# Supplementary material for: Characteristics of auto-quantified tumor-infiltrating lymphocytes and the prognostic value in adenocarcinoma of the esophagogastric junction, gastric adenocarcinoma, and esophageal squamous cell carcinoma
Source: Aging (Albany NY). 2024 Jul 5;16(13):11027–61. doi: 10.18632/aging.205999 (PMC11272125; doi:10.18632/aging.205999)
Supplement: Supplementary Dataset 1 [file aging-16-205999-s003.xls]

## Sheet: AEGJtrainingset
Supplementary Dataset 1. AEGJ cell feature training set
index	s.area	s.perimeter	s.radius.mean	s.radius.sd	s.radius.min	s.radius.max	m.cx	m.cy	m.majoraxis	m.eccentricity	m.theta	h.asm.s1	h.con.s1	h.cor.s1	h.var.s1	h.idm.s1	h.sav.s1	h.sva.s1	h.sen.s1	h.ent.s1	h.dva.s1	h.den.s1	h.f12.s1	h.f13.s1	h.asm.s2	h.con.s2	h.cor.s2	h.var.s2	h.idm.s2	h.sav.s2	h.sva.s2	h.sen.s2	h.ent.s2	h.dva.s2	h.den.s2	h.f12.s2	h.f13.s2	densityValues	numberNeighbors	sizeCytoplasma	classCell
1	173	43	7.03022	1.09007	4.66475	9.11512	81.8282	11.4571	18.7239	0.717625	-0.291996	0.0309124	1.85251	0.827157	6.35894	0.562713	28.9287	788.332	1.20237	1.59464	1.85251	0.535625	0.294034	0.650286	0.0233348	5.52239	0.490065	6.41479	0.387112	28.2687	750.287	1.17344	1.71402	5.52239	0.732629	0.117346	0.438619	8.97e-07	3	303	c
2	746	104	15.0594	4.53486	6.02759	23.2831	126.505	17.2447	45.0082	0.858956	-0.138079	0.0438746	1.17909	0.834965	4.57225	0.680827	30.619	882.354	1.13603	1.45962	1.17909	0.471711	0.315753	0.649215	0.0301946	3.04301	0.588582	4.6982	0.53034	30.3917	868.657	1.11872	1.60656	3.04301	0.624627	0.148365	0.47643	1.21e-06	6	835	c
3	580	78	13.4749	1.59245	11.1847	17.2751	309.391	22.8939	32.3841	0.638684	-0.631373	0.0262927	1.78899	0.854022	7.12761	0.597259	29.4762	818.621	1.26448	1.67975	1.78899	0.542005	0.301393	0.670106	0.017572	5.10081	0.586356	7.1657	0.418256	29.121	797.029	1.23787	1.85515	5.10081	0.714991	0.12686	0.471378	1.54e-06	4	657	c
4	511	95	13.6265	4.79944	5.22532	21.7204	254.595	30.9623	45.0549	0.929809	-1.18261	0.0294006	1.93989	0.855444	7.70983	0.580353	28.6154	773.634	1.25242	1.66925	1.93989	0.555005	0.293944	0.66137	0.0223596	6.03678	0.558639	7.83882	0.400736	28.1011	743.66	1.22475	1.80698	6.03678	0.757894	0.11139	0.43814	1.63e-06	6	809	c
5	406	66	11.3794	2.46861	7.24504	16.0134	278.156	28.1059	31.1916	0.828984	-1.03085	0.0359704	1.71666	0.775007	4.81491	0.606861	29.6848	826.974	1.16409	1.57017	1.71666	0.535437	0.239767	0.589941	0.0247746	4.80112	0.423986	5.16754	0.445074	29.5014	816.604	1.13354	1.72745	4.80112	0.712	0.0921842	0.392107	1.6e-06	4	464	c
6	470	86	12.6615	4.61845	5.09861	20.0318	172.809	30.162	43.7582	0.936972	-0.208795	0.0326774	1.79527	0.845603	6.81381	0.585732	28.0283	739.266	1.23636	1.61973	1.79527	0.539371	0.311441	0.670679	0.0221374	4.99005	0.569803	6.79973	0.424751	27.6766	719.126	1.20178	1.75121	4.99005	0.71832	0.137129	0.476724	1.56e-06	7	543	c
7	282	51	9.05859	0.621623	8.02366	10.7021	402.228	31.8265	21.4007	0.426191	0.0261702	0.0213522	2.85024	0.845952	10.2511	0.513044	24.943	591.349	1.33802	1.79813	2.85024	0.613814	0.298962	0.684471	0.0165305	7.81435	0.551218	9.70617	0.343724	24.211	552.395	1.2897	1.88666	7.81435	0.796878	0.131681	0.48324	1.98e-06	8	324	l
8	665	103	15.2259	5.30148	6.66535	24.5367	90.6395	36.9529	49.8468	0.927526	-0.0124522	0.0643768	1.18858	0.80302	4.01701	0.667372	29.0744	794.452	1.08201	1.36922	1.18858	0.473146	0.307266	0.625858	0.0435815	2.942	0.474858	3.80115	0.516297	28.6819	772.915	1.02954	1.50143	2.942	0.628698	0.0989833	0.380453	1.31e-06	7	753	c
9	391	76	11.5438	3.94811	5.37013	17.7415	341.936	46.863	38.7799	0.926528	-1.18857	0.0281024	2.21284	0.838757	7.86183	0.558372	28.2449	753.679	1.25522	1.6854	2.21284	0.576094	0.285433	0.655325	0.0195163	6.23511	0.540423	7.78353	0.402881	27.4451	707.942	1.23364	1.8239	6.23511	0.763632	0.114546	0.445841	2.13e-06	4	436	c
10	360	67	10.5304	2.16562	6.63239	14.8923	227.542	62.5875	27.2579	0.741917	-1.30084	0.078118	0.713313	0.79694	2.75641	0.740255	34.1293	1104.14	0.995878	1.22616	0.713313	0.389903	0.312611	0.604255	0.0535868	1.54072	0.57568	2.81551	0.5927	33.9577	1094.24	0.964976	1.35785	1.54072	0.495126	0.14019	0.430246	2.19e-06	5	636	c
11	514	94	12.1142	4.12148	2.65067	18.46	169.997	61.7034	38.663	0.847265	-0.0145394	0.0457723	0.900211	0.900736	5.53444	0.691816	31.5908	942.713	1.16918	1.45393	0.900211	0.426024	0.383112	0.705636	0.0294575	2.72811	0.710463	5.71116	0.522887	31.2857	923.42	1.16423	1.63114	2.72811	0.614047	0.188054	0.535927	2.08e-06	8	619	c
12	291	78	9.8671	3.24478	4.2888	16.8465	99.1026	71.6943	29.5914	0.846	-0.421255	0.0446693	1.15969	0.829732	4.40548	0.636182	31.9834	965.681	1.1092	1.43486	1.15969	0.455836	0.296815	0.627322	0.0378652	3.26009	0.555712	4.66889	0.455368	31.6906	948.401	1.08037	1.54431	3.26009	0.626631	0.124977	0.431346	1.84e-06	7	1876	c
13	268	51	8.81118	0.93842	6.64891	10.7463	592.639	76.5855	22.4485	0.633639	1.02664	0.0336552	2.52905	0.857983	9.90403	0.534522	26.7941	684.094	1.27925	1.70495	2.52905	0.601006	0.311424	0.683239	0.0233523	7.11872	0.576231	9.39929	0.374413	26.032	640.946	1.24351	1.82918	7.11872	0.79043	0.157686	0.518499	2.31e-06	9	1664	l
14	417	77	11.6836	2.87764	7.16268	17.3454	125.34	83.4136	33.2739	0.837654	-0.848975	0.0360987	1.47778	0.877878	7.05043	0.625466	28.3366	757.406	1.23158	1.57941	1.47778	0.505924	0.340114	0.690301	0.028102	3.90571	0.675281	7.014	0.468002	27.9171	733.851	1.20197	1.71671	3.90571	0.676082	0.171976	0.525388	2.19e-06	8	1274	c
15	205	48	7.98834	2.03151	4.16797	11.1223	223.32	85.7366	22.9284	0.841167	-1.00688	0.0481893	1.61339	0.782062	4.70148	0.601021	31.5096	936.667	1.12084	1.49325	1.61339	0.514395	0.25503	0.594721	0.030506	4.89881	0.427932	5.28167	0.415489	31.3988	929.326	1.11518	1.64299	4.89881	0.707911	0.10693	0.411584	2.56e-06	8	636	c
16	221	45	7.99529	0.629532	6.8257	9.08913	412.464	84.4696	19.7076	0.553443	-1.00737	0.0218832	2.75218	0.848098	10.059	0.503251	24.6177	576.319	1.31887	1.78081	2.75218	0.610365	0.304467	0.687369	0.0156327	7.73333	0.558249	9.75306	0.345564	23.7667	533.101	1.27619	1.89974	7.73333	0.799438	0.15704	0.525903	2.89e-06	10	457	l
17	546	87	12.6222	2.42206	6.08829	16.539	184.384	95.2099	29.1885	0.414807	1.1476	0.0694222	0.804626	0.856824	3.80992	0.711594	33.1895	1043.82	1.04315	1.29996	0.804626	0.405701	0.332501	0.636037	0.0511551	2.12227	0.62948	3.86391	0.566263	32.8428	1021.87	1.02242	1.43943	2.12227	0.560399	0.161534	0.472748	2.61e-06	7	700	c
18	635	88	13.9324	2.01134	9.98812	17.2834	106.588	107.294	33.1588	0.49304	0.153248	0.0581494	1.17309	0.910539	7.55643	0.676251	27.1957	700.731	1.20191	1.49085	1.17309	0.476104	0.40605	0.729474	0.0409183	3.22043	0.742677	7.25757	0.514699	26.7796	676.51	1.19246	1.6452	3.22043	0.646445	0.219915	0.577949	2.37e-06	7	1274	c
19	655	86	14.1125	1.95393	10.7107	18.1537	141.793	107.787	36.9959	0.688796	-1.23042	0.043646	1.92476	0.908188	11.482	0.608475	22.9377	508.172	1.30049	1.65114	1.92476	0.560477	0.399987	0.749666	0.0288206	5.3218	0.721518	10.555	0.463856	22.1488	468.128	1.28662	1.79685	5.3218	0.733796	0.229609	0.610363	2.62e-06	5	733	c
20	247	48	8.46616	1.02925	6.60919	10.2477	432.462	102.573	21.8218	0.645002	-1.39432	0.0282207	2.58732	0.860545	10.2765	0.533564	24.5517	575.229	1.29855	1.73	2.58732	0.604019	0.316929	0.69192	0.0244877	7.76852	0.586258	10.3881	0.378623	24.2778	558.959	1.27398	1.84487	7.76852	0.802714	0.148169	0.505603	3.03e-06	10	523	l
21	232	66	9.5342	4.08463	3.46055	16.4217	371.467	111.481	34.6898	0.9648	-1.27174	0.0564884	1.44417	0.665709	3.16005	0.588589	33.2356	1046.27	1.00098	1.35798	1.44417	0.485572	0.189659	0.497631	0.0424107	3.76786	0.150169	3.21683	0.424669	32.7083	1014.13	0.943062	1.48568	3.76786	0.648183	0.031746	0.216321	2.95e-06	4	313	o
22	152	42	6.698	1.72588	3.19837	9.7805	712.594	106.061	19.4149	0.834293	0.330351	0.0951023	0.752809	0.626151	2.00683	0.7	35.3446	1193.15	0.849933	1.096	0.752809	0.38275	0.189084	0.452297	0.078281	1.48649	0.250138	1.99117	0.591892	35.1622	1184.33	0.784036	1.14567	1.48649	0.496313	0.0405227	0.215129	1.5e-06	5	228	c
23	202	46	7.5935	0.726818	5.5605	8.92759	419.08	110.217	18.2792	0.446971	-1.16741	0.0198668	2.86207	0.845824	10.2818	0.5007	25.2869	608.327	1.32731	1.79889	2.86207	0.617392	0.289817	0.675638	0.0189556	8.04	0.504598	9.11462	0.332495	24.1467	548.816	1.24695	1.84135	8.04	0.801972	0.127755	0.471386	3.04e-06	9	523	l
24	239	55	8.26814	0.986955	6.41944	9.99683	538.414	119.036	19.4897	0.455179	-0.870102	0.0331582	1.51392	0.865569	6.63084	0.594752	29.2332	806.435	1.20774	1.57142	1.51392	0.502256	0.318765	0.67002	0.0236009	4.45274	0.606161	6.65299	0.411744	29	791.869	1.18437	1.71509	4.45274	0.685295	0.150587	0.493646	2.86e-06	11	1542	l
25	191	44	7.34778	0.871549	5.48142	8.84722	38.5508	119.003	18.2252	0.627974	0.0801088	0.043583	1.80029	0.793897	5.36745	0.606959	30.8586	898.214	1.15095	1.54646	1.80029	0.543064	0.262977	0.611477	0.0404043	4.3931	0.500488	5.3974	0.488549	30.2276	860.535	1.11851	1.58164	4.3931	0.69992	0.141232	0.46222	1.67e-06	5	3039	o
26	318	65	9.56814	1.61315	6.18951	12.5086	60.1378	129.703	24.8289	0.671404	0.0652503	0.0553369	1.80846	0.827059	6.22852	0.603008	28.3382	758.231	1.15136	1.51469	1.80846	0.546912	0.286497	0.630401	0.0464364	5.06564	0.508599	6.15428	0.458429	27.8224	728.679	1.11795	1.60016	5.06564	0.733157	0.101395	0.396365	2.12e-06	8	3039	o
27	262	51	8.69693	0.783109	7.23452	10.2482	239.952	129.766	21.3063	0.555634	0.119603	0.0438827	2.85073	0.805223	8.31794	0.557853	25.6775	624.681	1.2181	1.60796	2.85073	0.628792	0.292433	0.650756	0.0353306	7.31818	0.458143	7.75287	0.434217	25.0818	590.871	1.18249	1.64132	7.31818	0.789282	0.131931	0.454888	3.12e-06	11	2186	l
28	270	53	8.83292	0.991689	7.1054	10.8713	527.876	135.837	21.9202	0.619501	-1.42392	0.061728	2.42857	0.795255	6.93073	0.590163	27.2634	702.231	1.16867	1.58626	2.42857	0.601698	0.25655	0.610752	0.0422188	6.00448	0.481531	6.79059	0.454722	26.9103	681.672	1.13215	1.64456	6.00448	0.7585	0.119642	0.434546	2.94e-06	10	1542	l
29	86	28	4.79986	0.721123	3.42448	6.03075	731.354	131.497	12.4373	0.674705	0.217374	0.0814977	0.853242	0.688883	2.37126	0.683959	35.686	1214.93	0.896689	1.16033	0.853242	0.405925	0.21418	0.4929	0.0738814	2.04839	0.20605	2.29	0.53482	35.5968	1214.05	0.798166	1.19056	2.04839	0.531927	0.0940724	0.332992	1.21e-06	4	135	c
30	248	49	8.48023	0.94399	6.67547	10.8576	23.62	140.944	20.4217	0.553978	-0.103372	0.0610221	2.04319	0.738131	4.90117	0.621005	26.7896	673.87	1.09311	1.44078	2.04319	0.56441	0.25499	0.586222	0.0463039	5.47619	0.376826	5.39379	0.476262	26.5905	663.915	1.05979	1.54708	5.47619	0.715046	0.0939132	0.376029	1.64e-06	7	3039	l
31	294	57	9.25111	0.771332	7.20606	11.1959	60.5122	148.437	21.201	0.402207	-1.33547	0.0341162	1.42047	0.890087	7.46175	0.625798	28.1237	747.077	1.24156	1.59385	1.42047	0.498486	0.346575	0.698109	0.0238286	4.15289	0.665789	7.21298	0.452976	27.5744	715.824	1.20915	1.74663	4.15289	0.685379	0.170373	0.526955	2.32e-06	10	3039	l
32	208	45	7.69423	0.955236	6.06243	9.68491	38.6816	148.868	19.5834	0.639697	0.00685573	0.0535717	2.60985	0.76169	6.47575	0.581674	26.1891	645.682	1.16131	1.57906	2.60985	0.612431	0.240399	0.591984	0.0359485	7.03488	0.394648	6.81057	0.443964	25.8837	628.226	1.14471	1.68453	7.03488	0.781435	0.101519	0.406031	1.96e-06	8	3039	l
33	196	43	7.45057	0.523259	6.3945	8.40578	220.547	151.546	17.373	0.448934	0.982779	0.0715427	1.18582	0.712609	3.06307	0.663713	20.8993	402.985	1.00159	1.30339	1.18582	0.471043	0.226538	0.532182	0.0553605	2.42236	0.334668	2.82042	0.536118	20.6087	392.22	0.927216	1.3843	2.42236	0.592548	0.0619821	0.291099	3.3e-06	10	2186	l
34	268	50	8.81463	0.699916	7.15209	10.18	253.865	153.407	20.9433	0.452815	-0.875769	0.0343251	2.6833	0.833455	9.05578	0.543798	25.4022	612.394	1.25986	1.66899	2.6833	0.615875	0.291159	0.658605	0.0248845	7.72566	0.547285	9.5326	0.397065	24.8584	584.372	1.23708	1.77091	7.72566	0.792524	0.163362	0.519841	3.21e-06	12	311	l
35	358	69	10.7086	2.74455	6.11802	16.2421	78.1348	156.21	30.2318	0.812569	-0.630153	0.0462129	1.5233	0.876624	7.17341	0.647991	27.314	705.124	1.19974	1.54785	1.5233	0.519065	0.33293	0.67905	0.0339258	4.28094	0.654936	7.20311	0.510469	27.0167	688.674	1.16827	1.67403	4.28094	0.687899	0.185046	0.537767	2.66e-06	7	3039	l
36	190	41	7.34773	0.485496	6.28351	8.64867	543.749	155.505	16.5516	0.233284	-0.120638	0.0559838	1.1854	0.813718	4.18174	0.647093	20.1431	373.891	1.1076	1.40036	1.1854	0.469657	0.318101	0.641265	0.037461	2.9871	0.493151	3.94673	0.48691	19.7871	359.686	1.05514	1.53335	2.9871	0.611828	0.121945	0.424916	2.85e-06	9	1542	l
37	58	24	3.90172	0.831549	2.09207	5.16818	322.448	155.511	11.1125	0.768783	-0.804137	0.0885582	0.920213	0.538087	1.99609	0.654787	35.2819	1190.9	0.816866	1.08991	0.920213	0.401693	0.139026	0.387656	0.0726808	2.05405	0.159091	2.22133	0.491892	34.9189	1166.51	0.80615	1.16112	2.05405	0.50476	0.0698752	0.28396	2.96e-06	7	1242	l
38	291	53	9.19124	0.887924	7.59572	10.7307	179.871	162.437	22.608	0.597366	1.41028	0.0325269	2.52991	0.788645	6.98497	0.564598	24.472	560.945	1.24406	1.66416	2.52991	0.596848	0.272279	0.638877	0.0246995	6	0.448243	6.43718	0.423799	23.9421	534.026	1.17645	1.74271	6	0.745353	0.121654	0.449526	3.43e-06	14	741	l
39	174	40	7.00989	0.65253	5.74984	8.43568	525.683	158.629	15.5896	0.338558	-1.16538	0.174184	0.479936	0.58267	1.57501	0.777368	24.9422	588.309	0.724692	0.882271	0.479936	0.325083	0.197655	0.41945	0.140706	1.00735	0.246872	1.66878	0.655147	25.0368	593.229	0.714723	0.966846	1.00735	0.428974	0.0439275	0.206144	2.91e-06	10	1542	l
40	179	41	7.08327	0.573901	5.48482	8.12166	15.4488	165.413	16.913	0.495624	1.21991	0.0409482	2.31726	0.734578	5.36525	0.565356	27.6734	718.103	1.16002	1.56813	2.31726	0.590504	0.236763	0.586255	0.0318307	5.3741	0.362567	5.21543	0.439715	27.3309	700.095	1.0896	1.60285	5.3741	0.729188	0.102357	0.398484	1.63e-06	6	2600	l
41	608	97	13.3406	2.21373	9.10676	18.3504	649.582	176.716	32.1556	0.571706	-1.55287	0.0476787	0.854682	0.894316	5.04358	0.691387	34.6232	1135.83	1.14916	1.41303	0.854682	0.412149	0.382932	0.698497	0.0329235	2.29198	0.695891	4.76836	0.530855	34.2118	1107.77	1.12122	1.57287	2.29198	0.575447	0.171067	0.504873	2.11e-06	7	1083	c
42	251	53	8.49157	0.932431	6.8063	10.9055	146.894	171.044	20.7801	0.559434	-1.05681	0.0288933	1.9978	0.841684	7.30953	0.561571	25.8922	629.408	1.27172	1.67302	1.9978	0.555471	0.308647	0.676001	0.0225626	5.68844	0.505952	6.75698	0.406063	25.206	593.154	1.2099	1.7714	5.68844	0.742722	0.136368	0.47787	3.43e-06	13	923	l
43	303	64	9.71699	2.03952	5.79454	13.2659	220.656	176.866	24.5805	0.650061	-1.29149	0.0573525	2.06746	0.826161	6.94645	0.599947	27.5333	717.912	1.14778	1.49753	2.06746	0.570993	0.284919	0.626087	0.0411606	5.69531	0.518494	6.91406	0.453797	27.375	708.171	1.10314	1.58705	5.69531	0.746847	0.135692	0.45418	3.38e-06	12	2186	l
44	111	37	5.57693	1.25876	3.43509	7.99425	540.374	169.843	15.711	0.786589	1.5409	0.086932	1.09235	0.57057	2.27186	0.678628	22.8654	487.488	0.876962	1.17797	1.09235	0.463251	0.150103	0.417137	0.108599	1.08955	0.295093	1.77283	0.616418	22.403	471.226	0.741401	1.04547	1.08955	0.411569	0.0704083	0.271031	2.8e-06	7	1542	l
45	348	65	10.3864	2.63413	6.29154	14.6686	55.5437	178.369	31.9103	0.862222	0.481068	0.0272877	2.31142	0.874552	10.2127	0.571711	26.025	646.055	1.29619	1.73308	2.31142	0.587933	0.303265	0.679558	0.0202983	7.0102	0.625444	10.358	0.412456	25.3912	612.266	1.26971	1.85863	7.0102	0.77504	0.15899	0.524016	2.44e-06	11	442	l
46	115	38	6.06057	1.75947	2.85438	9.11564	162.669	175.497	17.88	0.878387	-0.895189	0.0693611	1.00767	0.665645	2.50689	0.655754	32.3325	990.42	0.941403	1.25176	1.00767	0.430962	0.187795	0.47803	0.0546914	2.55556	0.185104	2.56802	0.479085	32.2889	990.645	0.873473	1.31427	2.55556	0.570441	0.0402025	0.229114	3.51e-06	13	375	o
47	212	49	7.81586	0.969037	6.36427	9.97926	191.255	178.235	19.8574	0.606812	0.871431	0.0197662	2.96715	0.841264	10.3462	0.483462	25.3824	613.014	1.32835	1.81014	2.96715	0.618977	0.287505	0.674871	0.0154315	9.30675	0.482877	9.99858	0.31362	24.4356	563.163	1.27364	1.90599	9.30675	0.803018	0.161974	0.534158	3.5e-06	16	741	l
48	460	95	11.8276	3.88219	2.48902	18.1973	632.203	193.518	36.1213	0.843497	1.53202	0.0900053	0.525908	0.834067	2.5847	0.768493	37.3383	1328.18	0.973976	1.15199	0.525908	0.341944	0.366907	0.635666	0.0603419	1.29744	0.586833	2.57011	0.612821	37.1487	1315.97	0.941231	1.30492	1.29744	0.471085	0.148555	0.434666	2.2e-06	6	1083	c
49	199	59	7.62764	2.01092	3.50241	11.4683	593.788	187.197	20.7985	0.737671	0.187366	0.119359	0.616162	0.649899	1.87998	0.75772	39.6898	1515.14	0.802271	1.00619	0.616162	0.372059	0.207296	0.45564	0.0995984	1.07006	0.340501	1.81127	0.640764	39.7962	1526.4	0.754908	1.06145	1.07006	0.437823	0.0586089	0.249154	2.48e-06	7	852	c
50	492	88	12.6363	2.85302	6.51072	18.6542	678.746	194.951	33.4849	0.775435	-0.921788	0.0323248	1.28524	0.895853	7.17034	0.63188	32.2599	984.793	1.25351	1.58388	1.28524	0.480916	0.36878	0.715103	0.0218716	3.8756	0.68288	7.11061	0.450765	31.8373	957.279	1.23157	1.74612	3.8756	0.671598	0.177621	0.537119	1.72e-06	7	1307	c
51	135	35	6.20687	0.686053	4.98324	7.6029	203.511	187.923	15.3681	0.613342	0.788045	0.0310368	1.8072	0.786634	5.23498	0.542959	30.7225	889.322	1.15577	1.55271	1.8072	0.517235	0.25615	0.60521	0.0257951	5.63462	0.350651	5.33866	0.368934	30.1731	856.68	1.10488	1.64941	5.63462	0.723194	0.102799	0.404575	3.47e-06	13	741	l
52	176	53	7.26286	2.12578	2.66278	10.6504	154.179	191.111	22.256	0.84484	-1.51266	0.0366614	2.65517	0.701378	5.4457	0.541067	29.2266	802.497	1.1665	1.61385	2.65517	0.612503	0.20908	0.560319	0.0371598	5.89231	0.403527	5.93929	0.421585	28.6769	772.832	1.12757	1.61542	5.89231	0.750367	0.107291	0.409087	3.55e-06	14	375	o
53	280	61	9.43397	2.5914	5.37507	13.699	520.754	195.277	28.856	0.87364	-1.29058	0.0327368	2.06515	0.88365	9.87476	0.593648	28.1974	758.74	1.26593	1.64999	2.06515	0.568164	0.322996	0.685839	0.0242269	5.34234	0.690143	9.62065	0.439614	27.4595	716.525	1.24143	1.78182	5.34234	0.725458	0.182414	0.548345	2.71e-06	6	830	l
54	196	52	7.75508	2.01262	3.33114	11.4665	176.832	194.909	22.7107	0.838774	-0.947664	0.039394	1.54203	0.774748	4.4229	0.598334	30.8029	893.465	1.11594	1.49593	1.54203	0.497104	0.247959	0.587538	0.0314083	4.06849	0.447794	4.68385	0.425778	30.1781	857.084	1.08483	1.59526	4.06849	0.664333	0.106918	0.40607	3.56e-06	14	2034	o
55	267	51	8.85203	1.13584	6.64495	11.2293	406.359	198.57	23.2793	0.692959	-1.38426	0.0316788	2.85143	0.865494	11.5996	0.547361	25.8842	644.106	1.29644	1.72939	2.85143	0.624622	0.308318	0.68382	0.0264498	7.723	0.61042	10.9119	0.403965	24.9906	595.523	1.25039	1.80199	7.723	0.809777	0.193446	0.565837	2.76e-06	7	1367	l
56	409	68	10.985	1.04885	9.17846	12.9788	699.284	200.55	24.2304	0.329959	0.202353	0.0487374	1.10686	0.857592	4.88622	0.667321	33.7164	1075.9	1.13633	1.43614	1.10686	0.457208	0.328951	0.657173	0.032052	3.10644	0.6079	4.96129	0.499518	33.5994	1068.13	1.1127	1.59487	3.10644	0.619742	0.146405	0.47192	1.44e-06	5	1307	c
57	298	54	9.29229	1.01606	6.72824	10.7122	361.747	203.511	23.4924	0.608038	1.53503	0.0192914	2.36007	0.890227	11.7498	0.527925	26.6937	682.446	1.3598	1.79211	2.36007	0.581059	0.332494	0.714598	0.0142578	6.87952	0.662573	11.1941	0.358812	26.0522	645.2	1.32766	1.91756	6.87952	0.769805	0.171971	0.550339	2.66e-06	4	325	o
58	175	41	7.01374	0.649586	5.43881	8.11022	117.353	201.847	16.7603	0.512256	-0.105146	0.0635635	0.892971	0.763795	2.89024	0.678115	21.0879	410.006	1.00459	1.28378	0.892971	0.4144	0.269022	0.573617	0.038486	2.57343	0.433334	3.27067	0.490745	20.965	404.976	1.0034	1.48207	2.57343	0.582269	0.0897204	0.360502	3.37e-06	12	1142	l
59	266	68	9.47907	3.56813	4.49226	14.8057	581.121	204.862	33.1225	0.938687	-0.0249776	0.0360224	1.44937	0.815997	4.93844	0.59892	36.1878	1242.81	1.13766	1.50914	1.44937	0.493586	0.265925	0.608704	0.030742	4.06283	0.478902	4.89833	0.430385	35.4136	1190.32	1.08016	1.59911	4.06283	0.675887	0.121407	0.43212	2.46e-06	8	419	c
60	226	49	8.02794	0.646296	6.70758	9.36297	392.753	208.686	18.9878	0.409762	0.748048	0.0197385	2.86797	0.862238	11.4092	0.496247	27.2689	710.366	1.35376	1.81539	2.86797	0.617397	0.301683	0.689431	0.0180006	9.13757	0.577899	11.8239	0.341439	26.8201	684.196	1.32427	1.86308	9.13757	0.83094	0.170711	0.541949	2.66e-06	6	1367	l
61	288	55	9.23685	1.30842	7.10349	11.9676	509.162	214.861	23.3073	0.65088	-0.734198	0.0384408	2.64767	0.817693	8.2616	0.557582	25.2289	601.188	1.25411	1.67391	2.64767	0.609209	0.284395	0.652616	0.0273974	6.66116	0.519512	7.93166	0.40835	24.9752	585.958	1.20774	1.77204	6.66116	0.76829	0.151783	0.502519	2.57e-06	4	830	l
62	362	67	10.43	1.41263	7.50294	13.9694	221.41	217.055	26.2073	0.6428	0.745163	0.0389344	1.85553	0.885502	9.10286	0.619257	24.5327	571.543	1.2736	1.63142	1.85553	0.552214	0.361269	0.71618	0.0262403	5.0459	0.662222	8.46925	0.457515	23.8656	536.862	1.23748	1.76381	5.0459	0.726401	0.190711	0.557253	3.26e-06	11	2034	l
63	554	95	13.8447	4.71239	4.15897	22.0831	685.918	219.125	42.7939	0.890584	0.134743	0.0729183	0.557777	0.890718	3.55201	0.751536	36.5051	1268.29	1.02776	1.20963	0.557777	0.343876	0.420427	0.689038	0.0500634	1.47761	0.701018	3.47107	0.591258	36.2367	1249.4	1.00899	1.35967	1.47761	0.492296	0.211471	0.524365	1.54e-06	4	1307	c
64	160	40	6.77278	0.837473	4.97525	8.95003	112.282	216.193	15.4116	0.300394	0.565397	0.0894967	0.911032	0.701518	2.52611	0.69395	20.7224	396.931	0.930053	1.19867	0.911032	0.429071	0.229302	0.516607	0.0694401	2.18898	0.323381	2.61758	0.536359	20.4882	388.295	0.891911	1.29332	2.18898	0.559064	0.0952656	0.348357	3.33e-06	11	1142	l
65	79	30	4.64285	1.44552	1.99694	6.78143	583.389	216.962	14.7935	0.880688	-0.12019	0.136509	0.633588	0.480469	1.60977	0.724427	39.458	1501.7	0.729542	0.935604	0.633588	0.35548	0.118781	0.33382	0.0978996	1.77358	-0.141613	1.77679	0.520755	39.3962	1501.45	0.664896	1.07264	1.77358	0.487899	0.0349499	0.193485	2.38e-06	7	419	c
66	328	67	9.68483	1.76194	6.39574	12.9613	241.632	227.088	23.763	0.525819	0.0696427	0.0393596	2.34059	0.805745	7.02451	0.569453	27.2042	697.624	1.20674	1.63258	2.34059	0.592729	0.260375	0.621756	0.0268993	6.24906	0.463723	6.82633	0.428665	26.5358	660.881	1.16216	1.74774	6.24906	0.75621	0.109214	0.427582	3.05e-06	6	2034	l
67	550	85	13.5784	3.89886	6.39954	18.9439	707.913	235.081	41.1602	0.88822	-0.595815	0.075583	0.662598	0.865655	3.46602	0.737842	36.1772	1245.16	1.02106	1.2319	0.662598	0.377442	0.378059	0.66098	0.063162	1.64957	0.637698	3.27651	0.594822	35.8248	1221.35	0.983846	1.33386	1.64957	0.525177	0.167964	0.465798	1.22e-06	4	477	c
68	177	58	7.35517	1.96231	3.33205	10.7222	114.052	232.095	18.4731	0.578914	0.904038	0.0455365	1.46446	0.7731	4.2271	0.598775	30.4033	870.436	1.09474	1.45034	1.46446	0.495163	0.250358	0.582837	0.0399161	3.87786	0.40429	4.25482	0.446928	29.8626	840.64	1.02687	1.49854	3.87786	0.668224	0.0954411	0.373437	3.32e-06	10	1142	l
69	273	51	8.87526	0.41153	7.88033	9.70049	137.6	243.207	20.095	0.368443	0.452812	0.0338752	2.23876	0.76679	5.79987	0.567851	26.952	680.79	1.18716	1.62221	2.23876	0.583773	0.232921	0.589881	0.0242439	5.83913	0.391548	5.79835	0.417903	26.5087	657.13	1.13596	1.72893	5.83913	0.740697	0.108554	0.424266	3.43e-06	10	322	l
70	277	51	8.96231	0.579618	7.80698	10.3615	207.021	242.268	21.4581	0.442395	-0.273262	0.024572	3.07375	0.86797	12.6403	0.504714	24.9105	599.818	1.32386	1.77849	3.07375	0.637789	0.307419	0.689844	0.0201856	8.10619	0.608008	11.3397	0.369137	23.9381	546.718	1.27829	1.85363	8.10619	0.812253	0.162512	0.528725	3.26e-06	9	293	l
71	263	51	8.69127	0.700807	7.17363	9.95038	514.731	250.44	20.6193	0.498321	-1.45074	0.0341746	2.65836	0.78894	7.29764	0.56258	26.785	674.679	1.24789	1.69636	2.65836	0.607078	0.265291	0.636236	0.0234268	6.50463	0.460441	7.02773	0.434796	26.3194	648.687	1.19812	1.76026	6.50463	0.743108	0.137848	0.478977	2.23e-06	5	313	l
72	340	66	10.1249	2.30284	5.93539	13.9464	365.816	260.352	28.548	0.819474	-1.53436	0.0483832	0.99435	0.869491	4.80951	0.685648	32.7006	1010.79	1.1325	1.42666	0.99435	0.444534	0.34038	0.665589	0.0345491	2.66784	0.646807	4.77675	0.526621	32.5406	1000.64	1.10499	1.57834	2.66784	0.600961	0.161548	0.492173	2.22e-06	2	286	o
73	239	47	8.29075	0.705927	6.91892	9.71504	90.2202	258.214	20.1498	0.586294	-1.32338	0.0360226	2.77523	0.714704	5.86377	0.558999	25.2936	598.116	1.18059	1.63064	2.77523	0.611686	0.211572	0.565775	0.0225613	7.12919	0.362265	6.58946	0.389178	25.311	598.337	1.16337	1.77464	7.12919	0.773891	0.0909016	0.394322	3.02e-06	10	286	l
74	255	50	8.56288	0.571976	7.29178	10.096	159.414	258.376	20.4557	0.476692	-0.820342	0.0381426	2.19764	0.848543	8.25499	0.567748	24.9237	587.007	1.25552	1.62978	2.19764	0.575346	0.332648	0.691458	0.0246797	6.36715	0.541617	7.94523	0.403403	24.2126	549.916	1.22338	1.74934	6.36715	0.765292	0.168062	0.52398	3.41e-06	9	1797	l
75	250	53	8.57394	1.59696	5.49215	11.8112	282.098	262.025	23.2216	0.698492	-1.02089	0.0207531	3.09151	0.850552	11.3431	0.496467	25.7442	634.249	1.33176	1.80446	3.09151	0.631508	0.291135	0.677698	0.0185873	7.85263	0.560896	9.94166	0.357567	24.3579	561.029	1.26861	1.84015	7.85263	0.797712	0.15093	0.509392	2.56e-06	4	298	l
76	178	41	7.07578	0.620804	6.02933	8.33222	539.777	262.846	17.4232	0.544327	-1.39725	0.0235562	2.71205	0.825839	8.78606	0.488655	27.964	739.875	1.29112	1.73774	2.71205	0.596283	0.292422	0.669727	0.0208046	7.67424	0.449347	7.96831	0.337871	26.8106	675.958	1.20282	1.79975	7.67424	0.785186	0.141644	0.489834	2.11e-06	5	211	l
77	305	64	9.95348	3.16031	3.4848	15.5409	602.778	265.77	30.3681	0.879861	-0.242305	0.182895	0.338208	0.756244	1.69375	0.840768	34.3967	1133.97	0.758397	0.870958	0.338208	0.286618	0.340983	0.548582	0.121577	0.673387	0.549921	1.74808	0.731048	34.3105	1126.2	0.78616	1.00949	0.673387	0.377778	0.149491	0.387937	2.06e-06	8	682	c
78	336	62	9.91598	1.49584	6.98387	12.3732	164.953	273.943	25.5877	0.693155	-0.0430767	0.0334118	1.89069	0.843087	7.02462	0.611144	27.183	696.197	1.2217	1.61199	1.89069	0.552562	0.28831	0.647316	0.0230125	4.40288	0.639946	7.11419	0.457343	26.7122	671.489	1.18901	1.72496	4.40288	0.697152	0.167404	0.519918	3.35e-06	7	1797	l
79	193	45	7.38283	0.515895	6.25965	8.658	139.398	273.241	17.3232	0.422121	-0.78318	0.024429	2.14719	0.842485	7.81582	0.53369	27.2727	702.248	1.25096	1.6866	2.14719	0.557353	0.284855	0.654921	0.0166603	5.97386	0.587426	8.23974	0.351357	26.7974	676.279	1.23777	1.83058	5.97386	0.732659	0.154642	0.514012	3.34e-06	7	1797	l
80	362	76	11.4136	4.00974	5.04399	18.6313	617.209	283.177	36.7828	0.912534	-0.933006	0.0417003	1.01142	0.91578	7.0046	0.664155	34.9627	1162.88	1.20073	1.49016	1.01142	0.437234	0.39021	0.717235	0.0263182	2.88552	0.763562	7.10206	0.491139	34.6162	1138.2	1.19948	1.67216	2.88552	0.616511	0.209346	0.568868	1.92e-06	7	281	c
81	240	49	8.3064	0.647298	7.10368	9.85368	99.728	277.294	19.4451	0.411863	-0.00222174	0.0268563	2.0882	0.850718	7.99415	0.532087	27.4192	710.271	1.25854	1.67059	2.0882	0.55264	0.304045	0.671295	0.0183875	6.345	0.564814	8.28999	0.336299	26.995	686.902	1.22512	1.83462	6.345	0.728566	0.146822	0.502258	3.08e-06	9	838	l
82	231	51	8.33673	1.71361	5.59356	11.5255	647.308	282.724	22.0717	0.736517	-1.15764	0.0778816	0.784597	0.759823	2.63337	0.712947	36.5223	1269.7	0.970208	1.21481	0.784597	0.402168	0.285448	0.576791	0.0567564	1.73077	0.492572	2.70543	0.57888	36.3352	1257.72	0.942604	1.33949	1.73077	0.50962	0.131101	0.413914	1.76e-06	3	499	c
83	223	46	7.97897	0.581341	6.65274	9.69526	81.7345	280.769	18.6441	0.36698	0.137813	0.0341652	3.08158	0.804441	8.87892	0.534514	23.6452	529.724	1.25574	1.70416	3.08158	0.642985	0.275439	0.64791	0.0244707	8.98907	0.427891	8.85608	0.393	22.9563	495.265	1.21163	1.78547	8.98907	0.814555	0.137967	0.482159	2.86e-06	8	838	l
84	198	43	7.491	0.565403	6.31223	8.7222	127.139	283.247	18.189	0.500571	-1.25869	0.0313488	3.09244	0.780766	8.05284	0.50897	23.9608	540.243	1.26443	1.70556	3.09244	0.632478	0.269311	0.641768	0.0239969	8.01274	0.433372	8.07055	0.361725	23.3631	510.123	1.23043	1.7887	8.01274	0.808488	0.138432	0.483303	3.26e-06	8	1797	l
85	58	21	3.89227	0.3656	3.28813	4.63449	594.465	281.738	9.14245	0.399752	0.724661	0.0986952	0.947644	0.494787	1.93786	0.670681	33.534	1073.52	0.812225	1.1025	0.947644	0.426204	0.110143	0.347268	0.114583	1.36111	0.0867202	1.74518	0.619444	33.3611	1068.13	0.703636	1.05291	1.36111	0.489189	0.0263384	0.166466	1.98e-06	7	682	c
86	239	48	8.27979	0.605412	6.70319	9.33271	67.434	287.358	19.8461	0.473743	0.870646	0.046727	2.35821	0.83591	8.18571	0.577255	24.4707	567.199	1.2153	1.57844	2.35821	0.596091	0.322987	0.674955	0.0371773	7.1194	0.531285	8.5946	0.440601	24.2438	554.72	1.19034	1.68312	7.1194	0.771556	0.167269	0.514313	2.64e-06	7	838	l
87	335	58	9.91633	1.03929	7.9849	12.2742	339.024	288.823	24.2047	0.618307	0.0605116	0.0342439	1.56589	0.820216	5.35491	0.597275	29.6613	826.441	1.19047	1.56978	1.56589	0.507278	0.285124	0.637705	0.0262352	3.67148	0.559754	5.16981	0.440074	29.2744	804.29	1.14462	1.67804	3.67148	0.647483	0.130983	0.457804	2.07e-06	3	364	l
88	346	62	10.0608	0.798665	8.71399	12.2881	426.069	297.029	22.6892	0.390907	-0.564017	0.0296028	2.31505	0.780711	6.27853	0.545677	30.2602	862.315	1.21685	1.67078	2.31505	0.577574	0.236171	0.600606	0.0214275	6.33677	0.424079	6.50142	0.392351	29.9656	844.075	1.18359	1.78095	6.33677	0.75889	0.0859332	0.384425	1.87e-06	5	1175	l
89	200	43	7.53619	0.433517	6.50003	8.36906	178.753	296.448	17.2552	0.308829	-0.585845	0.0392087	2.26418	0.801541	6.7044	0.555582	26.6321	666.808	1.21055	1.59674	2.26418	0.58271	0.28949	0.646163	0.0341615	6.43478	0.439379	6.73898	0.396325	26.0248	634.515	1.16536	1.6559	6.43478	0.755652	0.113605	0.425226	3.25e-06	6	242	l
90	225	62	8.73919	3.26463	3.00017	14.2195	634.174	302.042	29.8127	0.926588	-1.23043	0.103475	0.569797	0.748295	2.13188	0.750127	36.8972	1301.79	0.871727	1.05955	0.569797	0.348593	0.284986	0.544805	0.0815644	1.28488	0.446144	2.15994	0.615698	36.7151	1290.24	0.841889	1.16656	1.28488	0.471366	0.092175	0.326499	1.78e-06	4	499	c
91	144	44	7.03831	2.71149	2.04407	11.2289	596.377	302.314	23.9977	0.940741	0.909927	0.134192	0.608081	0.539403	1.6601	0.749293	37.6667	1365.04	0.747795	0.949213	0.608081	0.364562	0.147271	0.374258	0.105769	1.15385	0.170984	1.69591	0.642308	37.75	1373.71	0.708342	1.02957	1.15385	0.459948	0.0174021	0.133834	1.86e-06	2	167	c
92	223	47	7.97148	0.636247	6.93646	9.05818	268.368	302.134	18.3769	0.348845	-0.382333	0.0548704	1.99753	0.820487	6.56376	0.573348	28.6568	776.423	1.15833	1.52572	1.99753	0.560961	0.288598	0.634227	0.0397445	5.51613	0.472668	6.23023	0.416001	28.4194	760.688	1.11948	1.61715	5.51613	0.736658	0.125636	0.441476	2.57e-06	6	253	l
93	268	51	8.81849	0.656587	7.45307	10.3715	97.6186	307.086	20.6173	0.528933	0.975012	0.0495388	2.31568	0.6423	4.2369	0.570683	27.1079	688.286	1.07616	1.50612	2.31568	0.58756	0.151293	0.467417	0.0382137	5.8114	0.160067	4.45944	0.439953	26.9342	679.602	1.01944	1.58209	5.8114	0.740434	0.0433567	0.260217	2.96e-06	6	5506	l
94	244	48	8.40091	0.865613	6.27564	10.0607	236.463	307.312	20.7869	0.571359	-1.08244	0.0267829	2.68581	0.830538	8.92454	0.52789	25.661	623.233	1.2844	1.73083	2.68581	0.613124	0.279156	0.655497	0.024994	6.48705	0.506047	7.56646	0.380166	24.5699	565.933	1.20001	1.76415	6.48705	0.767033	0.131259	0.468513	2.87e-06	8	3166	l
95	440	82	11.5907	2.43304	6.32579	16.3488	718.742	318.471	28.4539	0.561312	0.290808	0.0339945	1.21742	0.906317	7.49753	0.652126	31.9006	965.245	1.23343	1.56044	1.21742	0.474224	0.370737	0.713044	0.0287752	3.45692	0.737873	7.59397	0.492954	31.8381	961.841	1.19629	1.65541	3.45692	0.659071	0.203377	0.559072	1.07e-06	3	1095	c
96	327	76	10.8264	3.60975	4.66044	18.3779	29.0767	316.767	34.1616	0.907506	-0.378895	0.0400555	1.75616	0.78873	5.1562	0.599693	27.4605	706.533	1.16099	1.53393	1.75616	0.533342	0.271396	0.618259	0.0271915	4.52239	0.489244	5.42716	0.444205	27.194	692.675	1.12703	1.66623	4.52239	0.701867	0.105558	0.411661	1.91e-06	5	2133	c
97	491	81	12.4824	3.6241	6.30846	18.2654	53.948	326.541	37.8498	0.865371	0.458741	0.0373009	1.09571	0.870507	5.23076	0.644884	29.8482	837.118	1.19002	1.51943	1.09571	0.446537	0.33558	0.676838	0.0241024	3.32706	0.633368	5.53732	0.456308	29.5812	821.777	1.17422	1.70861	3.32706	0.633572	0.143996	0.482585	2.33e-06	7	2133	c
98	275	56	9.21187	1.83836	5.71599	13.1078	30.8515	336.714	24.6314	0.766344	-0.450576	0.0454524	1.14715	0.845278	4.70713	0.653171	29.4915	818.968	1.11391	1.43408	1.14715	0.464191	0.312711	0.642119	0.0344128	3.09459	0.579171	4.67679	0.504575	29.0676	794.476	1.08788	1.55886	3.09459	0.638263	0.143257	0.462389	1.9e-06	6	2133	c
99	351	59	10.1676	0.742594	8.83467	11.9242	236.549	341.5	23.6575	0.443858	-0.373981	0.0273983	1.85373	0.887744	9.25669	0.587955	26.1047	646.023	1.30853	1.70386	1.85373	0.545289	0.344064	0.712315	0.0190722	5.37667	0.661892	8.95111	0.413604	25.67	621.442	1.27708	1.83127	5.37667	0.72846	0.178341	0.548928	2.81e-06	11	3166	l
100	333	64	9.90977	1.93405	5.46663	13.7435	22.0439	352.823	26.0829	0.716633	-0.244831	0.0760954	0.809367	0.824372	3.30421	0.711668	30.3772	870.31	1.01899	1.26426	0.809367	0.407914	0.320062	0.618295	0.0506573	2.16547	0.536181	3.33439	0.533497	30.1223	855.444	0.9972	1.41416	2.16547	0.554461	0.118825	0.404479	1.71e-06	6	2133	c
101	383	62	10.5926	0.788635	9.2185	12.5369	267.854	354.246	25.7121	0.529765	-0.352349	0.0422754	2.4793	0.850264	9.27892	0.572377	23.5895	529.268	1.25942	1.64027	2.4793	0.600599	0.324958	0.686162	0.031603	7.2006	0.571714	9.4063	0.424369	23.1467	507.508	1.21309	1.72868	7.2006	0.762016	0.163507	0.514732	2.47e-06	7	436	l
102	275	56	8.98194	1.26277	6.60207	11.125	227.004	359.556	23.0972	0.677356	-1.32465	0.034139	2.89	0.754748	6.8919	0.540161	24.82	577.593	1.22094	1.68177	2.89	0.615657	0.216683	0.579206	0.0266163	6.97321	0.403418	6.84431	0.374085	24.375	555.169	1.16368	1.76676	6.97321	0.766291	0.1087	0.428709	2.85e-06	11	3166	l
103	262	48	8.71288	0.358645	7.98558	9.46808	101.913	367.256	19.8805	0.317451	0.0480778	0.0303182	2.39438	0.815976	7.50563	0.543898	24.411	559.673	1.25838	1.6826	2.39438	0.586071	0.281173	0.650642	0.0230202	6.21659	0.5088	7.32796	0.381472	23.7926	529.09	1.20957	1.76025	6.21659	0.734398	0.128814	0.46392	2.78e-06	10	5506	l
104	240	49	8.29913	0.63156	6.56918	9.28192	120.31	368.18	19.508	0.461787	0.296973	0.0501668	1.76835	0.839261	6.50067	0.594644	26.4564	659.045	1.18172	1.54068	1.76835	0.540813	0.311378	0.658372	0.0349674	4.56995	0.536684	5.93178	0.437835	25.8446	625.517	1.1391	1.63681	4.56995	0.706852	0.13933	0.466262	2.91e-06	10	5506	l
105	290	57	9.25218	1.19661	7.4304	11.4547	222.127	380.46	23.9416	0.667199	-1.42304	0.0241861	2.81604	0.86817	11.6806	0.535493	25.6745	632.37	1.33396	1.75774	2.81604	0.619732	0.322539	0.700946	0.0203078	7.46444	0.632524	11.1564	0.380137	24.9205	591.096	1.29986	1.82952	7.46444	0.782239	0.188325	0.562481	2.86e-06	11	3166	l
106	364	59	10.332	0.974215	7.30648	11.6762	629.929	378.407	23.9873	0.504064	-0.396347	0.045715	1.23185	0.838546	4.81488	0.636309	31.7933	953.988	1.13456	1.45382	1.23185	0.469894	0.312916	0.645635	0.0305664	3.40881	0.555293	4.83264	0.46546	31.5346	937.924	1.10431	1.61494	3.40881	0.643157	0.11535	0.423522	1.75e-06	5	394	c
107	225	57	8.22933	1.96316	4.73912	12.8248	71.8579	380.891	22.2558	0.74676	-1.16009	0.0728124	0.860025	0.755615	2.75957	0.701639	20.3228	380.292	0.980813	1.2348	0.860025	0.41567	0.278974	0.574361	0.0610186	2.02688	0.388721	2.6579	0.546331	20.1559	374.441	0.924785	1.31544	2.02688	0.552184	0.0795406	0.321306	2.43e-06	9	5388	l
108	334	66	10.6764	3.5795	5.51617	16.8236	475.489	385.742	34.3425	0.925675	0.995867	0.086435	0.898932	0.730469	2.66758	0.710155	35.6582	1209.36	0.965342	1.23053	0.898932	0.431303	0.256977	0.551635	0.0659439	2.1	0.402976	2.75872	0.578604	35.5286	1202.09	0.928701	1.30874	2.1	0.567027	0.0864262	0.333913	1.61e-06	7	353	c
109	263	57	8.67844	1.06403	6.457	10.7127	114.004	384.997	20.6213	0.442597	-1.3005	0.0585238	2.60778	0.820683	8.27144	0.572533	23.857	539.296	1.21151	1.61501	2.60778	0.610413	0.288087	0.647551	0.0433948	5.88835	0.500549	6.89482	0.455637	22.8495	489.567	1.1268	1.60346	5.88835	0.751869	0.137941	0.459845	2.82e-06	10	5506	l
110	379	77	10.9813	2.43095	5.74974	16.499	31.9772	391.577	29.8336	0.785346	-0.795434	0.0373706	1.20435	0.884762	6.22547	0.63665	29.3565	813.217	1.18704	1.51463	1.20435	0.464927	0.352412	0.690566	0.0253584	3.36677	0.681414	6.28393	0.447892	29.047	794.573	1.17582	1.67142	3.36677	0.627809	0.189102	0.542825	1.82e-06	7	5388	c
111	304	54	9.61103	1.57099	6.38524	11.9456	443.086	394.183	25.3993	0.763339	-0.876231	0.0416617	1.15385	0.865156	5.27844	0.652015	33.9499	1090.76	1.16583	1.49207	1.15385	0.46099	0.33736	0.673943	0.0249599	3.50199	0.600943	5.38784	0.47419	33.4622	1057.9	1.1535	1.69017	3.50199	0.648978	0.142748	0.478335	1.51e-06	4	277	c
112	282	54	9.08518	1.06472	6.90624	12.3735	95.5039	394.909	21.7649	0.529294	-0.293999	0.0455345	1.66796	0.830712	5.92639	0.620763	26.8563	677.304	1.18014	1.54243	1.66796	0.533198	0.307552	0.655076	0.0289412	5.25806	0.511077	6.37719	0.458244	26.6532	665.907	1.16487	1.71587	5.25806	0.726009	0.125319	0.452762	2.65e-06	8	5506	l
113	293	67	9.24408	2.19913	4.29791	13.2533	68.5489	400.349	25.1032	0.755575	1.08004	0.0966054	0.604762	0.746709	2.19381	0.749048	22.6676	478.047	0.898916	1.10366	0.604762	0.36321	0.272241	0.542	0.0679223	1.5	0.394705	2.23907	0.590678	22.6186	476.819	0.86175	1.24226	1.5	0.490524	0.0758654	0.305476	2.35e-06	11	5388	l
114	251	53	9.24013	2.89582	4.74126	13.5064	459.589	411.113	29.1141	0.918041	-0.906617	0.0959049	0.60663	0.786261	2.41909	0.764309	37.2099	1320.73	0.937963	1.14473	0.60663	0.369007	0.311686	0.587113	0.0710588	1.37688	0.560459	2.56627	0.635058	37.0352	1308.19	0.933889	1.28376	1.37688	0.482611	0.166098	0.455504	1.62e-06	6	263	c
115	588	87	14.1889	3.84262	6.57248	21.3725	469.833	425.352	41.5542	0.87308	-0.819535	0.0508324	0.912193	0.87806	4.74033	0.704831	33.6374	1069.29	1.15296	1.43152	0.912193	0.431908	0.374209	0.694711	0.0372132	2.48276	0.673321	4.8	0.545023	33.4866	1059.36	1.13469	1.57783	2.48276	0.587329	0.184035	0.523171	1.7e-06	6	572	c
116	377	83	10.756	2.94368	6.3096	16.7265	271.7	440.777	32.4109	0.802767	1.24577	0.0255152	2.11795	0.894451	11.033	0.586213	26.811	687.982	1.31652	1.72661	2.11795	0.572335	0.338965	0.711155	0.0160118	6.39009	0.695528	11.4937	0.41562	26.5511	672.116	1.32151	1.90185	6.39009	0.76577	0.169588	0.544987	2.5e-06	7	3271	l
117	354	65	10.2558	1.69581	6.69931	13.3043	318.046	441.771	24.3916	0.531202	-0.859042	0.0939757	0.853303	0.741405	2.64988	0.709646	31.8717	961.937	0.949397	1.20139	0.853303	0.421618	0.262384	0.551627	0.0658214	2.07692	0.351422	2.60114	0.572625	31.7224	953.483	0.914041	1.32501	2.07692	0.56736	0.0579312	0.275691	2.16e-06	8	494	c
118	285	61	9.10307	1.82357	4.51832	12.1523	58.2059	449.164	24.8579	0.75712	-0.691385	0.040178	2.07067	0.780878	5.72492	0.567838	28.1191	743.357	1.16488	1.57604	2.07067	0.565413	0.234813	0.585231	0.0306537	5.30263	0.427528	5.63134	0.410462	27.5307	711.211	1.11123	1.6545	5.30263	0.72921	0.0823721	0.364004	2.12e-06	8	5388	l
119	437	88	13.9894	6.08218	3.92955	24.2114	356.983	463.303	50.8658	0.970777	-0.941753	0.0701011	0.953972	0.799852	3.38316	0.709454	31.6248	945.427	1.01686	1.29973	0.953972	0.439771	0.295206	0.602042	0.0489923	2.03562	0.598619	3.53576	0.572515	31.5096	938.164	1.01275	1.43099	2.03562	0.552847	0.139042	0.438768	2.08e-06	6	685	c
120	690	88	14.4616	2.11365	10.6775	18.9667	456.669	457.813	36.8061	0.710147	-0.260598	0.0608714	0.95249	0.894854	5.52935	0.69606	31.1831	918.924	1.15385	1.41223	0.95249	0.44014	0.395884	0.708484	0.0497911	2.76973	0.68362	5.37721	0.54331	30.9952	906.552	1.13193	1.55119	2.76973	0.62366	0.187932	0.52452	1.81e-06	6	696	c
121	710	107	16.0336	5.13227	6.61233	26.0887	375.577	471.581	48.4352	0.873464	-0.921585	0.0411427	1.13504	0.883261	5.86147	0.666407	31.2663	922.282	1.2002	1.51625	1.13504	0.462415	0.348573	0.687569	0.0262451	3.1072	0.692394	6.05062	0.492234	31.248	920.669	1.1885	1.69687	3.1072	0.632742	0.163511	0.510667	2.06e-06	5	2076	c
122	212	55	7.93619	1.82344	3.959	11.1012	33.7161	460.517	20.6196	0.674804	1.27608	0.0383129	1.80267	0.785158	5.19533	0.577298	29	790.002	1.16076	1.54516	1.80267	0.537688	0.264085	0.612438	0.0325436	4.90303	0.439714	5.37547	0.42267	28.5515	765.092	1.11991	1.6127	4.90303	0.713585	0.12448	0.438989	1.76e-06	8	5388	l
123	167	40	6.90805	0.91004	5.525	8.62703	124.895	461.135	18.2609	0.679762	-0.991241	0.0261981	3.57215	0.776966	9.00809	0.493354	24.9111	586.969	1.27828	1.75853	3.57215	0.665951	0.244543	0.622366	0.0215182	8.86029	0.451876	9.08238	0.339921	24.7132	575.051	1.22746	1.79932	8.86029	0.817858	0.142188	0.490662	2.65e-06	6	216	l
124	312	56	9.58982	1.50219	7.39161	12.935	79.0372	470.506	25.9528	0.729567	1.54322	0.0233306	2.67219	0.860324	10.5657	0.527268	24.646	579.036	1.33411	1.78249	2.67219	0.610404	0.30597	0.689025	0.0198342	8.10687	0.572604	10.484	0.372477	23.9466	543.222	1.28839	1.88261	8.10687	0.8073	0.168107	0.540509	2.32e-06	8	1276	l
125	84	28	4.76984	0.825265	3.39586	6.32708	510.588	465.895	12.7645	0.724939	1.18231	0.0887535	1.09474	0.583977	2.31572	0.650526	35.8316	1225.71	0.881059	1.17268	1.09474	0.449607	0.161696	0.43175	0.0747929	2.95385	0.0938135	2.62982	0.501538	36.0615	1244.3	0.837454	1.23702	2.95385	0.595687	0.0374002	0.214598	1.77e-06	4	95	c
126	176	41	7.04033	0.648566	5.95622	8.25144	252.787	476.63	17.1403	0.553066	1.07601	0.0251632	2.22029	0.781533	6.08151	0.514911	27.9794	733.787	1.22719	1.68611	2.22029	0.556809	0.234735	0.601135	0.0180363	6.45833	0.433728	6.7025	0.34008	27.8472	727.018	1.18889	1.83655	6.45833	0.736676	0.111603	0.441738	2.54e-06	8	230	l
127	362	66	10.4773	2.18552	6.61337	14.1103	586.737	481.913	29.2751	0.791925	1.01021	0.0315608	1.50188	0.888479	7.73362	0.610495	29.9925	851.327	1.25409	1.60268	1.50188	0.50723	0.359508	0.710371	0.0237746	4.26045	0.677228	7.59979	0.463442	29.5916	827.026	1.2211	1.70945	4.26045	0.691284	0.215539	0.581644	1.66e-06	6	362	c
128	469	75	12.309	3.18828	7.39751	17.9723	472.376	489.648	37.165	0.869688	-1.16888	0.0529448	2.51922	0.851366	9.47456	0.587521	26.4917	669.514	1.23034	1.59929	2.51922	0.6066	0.325584	0.680518	0.046476	6.17949	0.545533	7.79861	0.491668	25.6872	622.341	1.16522	1.62787	6.17949	0.757533	0.15248	0.485417	1.79e-06	7	513	c
129	109	34	5.49899	1.1226	3.13439	7.40832	425.297	481.714	14.485	0.696181	-1.37077	0.195664	0.404826	0.689058	1.65097	0.810456	38.4102	1426.59	0.669083	0.797588	0.404826	0.307902	0.277546	0.476089	0.14875	0.975	0.329897	1.7275	0.6925	38.3	1416.92	0.683726	0.897675	0.975	0.436895	0.0629891	0.23814	1.93e-06	7	2076	c
130	366	68	10.9367	2.76403	4.96146	15.5317	562.113	487.175	31.5556	0.832439	-0.773093	0.0384314	1.28635	0.863729	5.71983	0.648283	31.9754	965.052	1.19456	1.52846	1.28635	0.483912	0.332558	0.675629	0.0274102	3.22112	0.643639	5.51946	0.487788	31.6832	946.142	1.16619	1.6514	3.22112	0.634155	0.160069	0.49974	1.66e-06	5	393	c
131	337	66	10.1619	2.19016	6.36632	14.9863	380.821	490.528	27.3333	0.761542	-0.947519	0.0388268	0.848337	0.92461	6.62631	0.684834	30.7721	894.544	1.22744	1.4889	0.848337	0.405942	0.424733	0.742946	0.0257826	2.65809	0.751299	6.34394	0.492323	30.3419	868.089	1.19794	1.6695	2.65809	0.591824	0.203816	0.561582	2.08e-06	5	2076	c
132	431	71	11.3218	1.47627	8.59273	14.3676	399.048	489.136	28.2131	0.689813	-0.828938	0.118987	0.4025	0.850755	2.34845	0.80625	35.6412	1210.08	0.926848	1.05482	0.4025	0.303052	0.416726	0.652748	0.0890199	0.831063	0.658473	2.21669	0.672752	35.4578	1198.23	0.900657	1.15767	0.831063	0.387909	0.209325	0.486951	2.02e-06	6	2076	c
133	315	60	9.61662	1.1267	7.37684	12.7391	67.5119	488.517	23.0774	0.550799	-0.253146	0.0430823	1.84649	0.828347	6.37856	0.620788	27.9922	738.752	1.17644	1.57275	1.84649	0.550292	0.275851	0.628841	0.0299701	4.96014	0.572855	6.80616	0.49032	27.9964	738.109	1.16646	1.70724	4.96014	0.723479	0.151875	0.494637	2.15e-06	9	1276	l
134	259	76	8.94645	2.78613	2.66823	13.9497	415.466	496.874	25.7339	0.796013	-1.35717	0.187672	0.424612	0.591959	1.52031	0.811641	38.1785	1407.08	0.689576	0.832725	0.424612	0.317836	0.203981	0.415137	0.177244	0.642857	0.281592	1.44742	0.739796	38.1633	1410	0.628599	0.840979	0.642857	0.372017	0.0563674	0.218193	1.95e-06	6	2076	c
135	557	96	13.4186	3.685	4.97581	20.6097	502.6	526.536	34.6414	0.641721	1.37319	0.0537228	1.02232	0.891622	5.71644	0.704236	34.4381	1127.21	1.13092	1.42001	1.02232	0.453117	0.362781	0.6834	0.0347027	2.83333	0.703312	5.77493	0.543044	34.1833	1108.9	1.12836	1.58262	2.83333	0.622714	0.174877	0.511477	1.46e-06	5	557	c
136	226	45	8.08915	0.686913	6.65202	9.71393	594.444	517.388	17.8994	0.264444	1.37367	0.0542118	0.836784	0.842572	3.65767	0.692692	33.8356	1083.53	1.06769	1.33286	0.836784	0.407089	0.332832	0.6424	0.0378482	2.03279	0.611301	3.61486	0.519769	33.5956	1067.92	1.04573	1.4735	2.03279	0.533795	0.147714	0.457647	1.5e-06	6	250	c
137	204	43	7.61661	0.388136	6.68559	8.44266	132.505	520.179	17.5254	0.308528	-0.786293	0.0320955	2.98376	0.772661	7.56236	0.537721	25.1083	592.981	1.23954	1.67566	2.98376	0.630137	0.267039	0.635096	0.0238437	7.63314	0.426114	7.6504	0.397581	24.9112	580.875	1.20667	1.7573	7.63314	0.798317	0.119795	0.447915	2.28e-06	10	243	l
138	301	63	9.33826	1.28177	5.86988	11.4064	460.556	523.273	21.1017	0.378083	-0.901736	0.0579975	0.820841	0.829252	3.40367	0.697075	34.8099	1147.68	1.06242	1.32278	0.820841	0.405859	0.322641	0.63153	0.0444727	1.95041	0.570383	3.26994	0.544871	34.5702	1133.36	1.01093	1.43841	1.95041	0.541821	0.141343	0.443276	1.6e-06	6	902	c
139	232	49	8.16383	0.816329	6.56147	9.62203	91.8594	523.399	20.8925	0.645935	-1.17885	0.0369641	2.60735	0.819531	8.22382	0.554286	23.8268	535.822	1.25395	1.6611	2.60735	0.609028	0.301452	0.667426	0.0247424	7.35859	0.508991	8.49334	0.403671	23.7222	528.914	1.22112	1.77904	7.35859	0.791973	0.168166	0.527879	2.11e-06	11	1079	l
140	714	94	14.8376	2.61618	9.26628	20.1154	537.061	537.293	38.4605	0.726438	1.51759	0.0467043	0.843866	0.898655	5.16332	0.70649	32.5212	998.251	1.17727	1.43668	0.843866	0.416661	0.403259	0.718332	0.0311734	2.17453	0.73845	5.15701	0.544914	32.3035	984.205	1.16262	1.60417	2.17453	0.566621	0.209461	0.5594	1.31e-06	3	688	c
141	316	57	9.62101	0.874346	8.16527	11.7558	47.2563	531.323	22.6901	0.531208	0.507797	0.0476482	1.55976	0.802035	4.93949	0.624648	27.632	716.016	1.14013	1.49261	1.55976	0.519818	0.27707	0.617459	0.0363979	3.91221	0.470392	4.6935	0.483943	27.1107	688.12	1.0865	1.55819	3.91221	0.670471	0.10235	0.39334	1.59e-06	8	2087	l
142	362	63	10.3845	1.71547	7.33095	13.6352	28.6275	540.954	27.5138	0.729997	-1.39554	0.0276515	1.92895	0.847643	7.33035	0.591704	26.3822	653.693	1.27642	1.6867	1.92895	0.551838	0.30904	0.678368	0.0199763	5.14706	0.582117	7.15849	0.431391	25.8856	626.948	1.23889	1.83194	5.14706	0.716938	0.145689	0.500135	1.24e-06	6	2087	l
143	286	61	9.33284	1.78108	6.27678	12.9768	57.4782	547.469	24.0546	0.74088	-1.42831	0.0331012	2.68177	0.709013	5.60806	0.568081	27.4995	708.507	1.17924	1.6387	2.68177	0.599243	0.208533	0.563174	0.0214872	6.49793	0.367581	6.13736	0.414128	27.3444	699.423	1.1648	1.77374	6.49793	0.744174	0.0955652	0.403818	1.48e-06	7	2087	l
144	243	50	8.3211	1.22839	5.10004	9.9081	610.035	542.638	20.6725	0.6205	0.0771138	0.0748161	0.952489	0.814599	3.56872	0.683937	33.6063	1071.13	1.02089	1.29082	0.952489	0.43552	0.311294	0.615363	0.0582561	2.59799	0.478631	3.49151	0.528909	33.2814	1050.45	0.984702	1.41076	2.59799	0.604515	0.102813	0.376549	1.31e-06	5	260	c
145	296	52	9.29079	0.681866	7.54251	10.3276	109.115	558.771	20.9724	0.401263	0.602574	0.0449828	2.11387	0.690117	4.41075	0.582515	27.921	730.241	1.11222	1.52227	2.11387	0.561804	0.198856	0.534296	0.0303884	5.13546	0.289335	4.61314	0.432033	27.7012	718.275	1.07494	1.63412	5.13546	0.717874	0.0777427	0.351875	1.57e-06	7	1079	l
146	284	53	9.24798	1.50302	6.81069	11.9483	107.698	15.6424	24.8716	0.77159	-1.03689	0.0517306	2.21422	0.779178	6.01358	0.582358	27.6878	722.119	1.14955	1.54625	2.21422	0.583615	0.248077	0.595494	0.0412956	5.44492	0.397581	5.51921	0.439733	27.089	689.097	1.08004	1.64613	5.44492	0.734568	0.0937882	0.386711	9.54e-07	3	279	c
147	155	42	6.82927	1.64165	4.73833	9.76263	230.066	15.6389	19.5492	0.82216	0.690778	0.0348738	2.7477	0.700704	5.59027	0.505439	30.6335	884.767	1.15211	1.619	2.7477	0.605653	0.181919	0.526068	0.0324764	7.5913	0.190979	5.69166	0.355417	30.1826	857.81	1.08562	1.58731	7.5913	0.786422	0.0939406	0.380573	9.2e-07	4	708	o
148	230	49	8.3253	1.79559	5.53799	11.6783	265.566	16.0283	23.5859	0.803221	0.534988	0.0386862	2.57452	0.808133	7.70913	0.556458	28.25	756.164	1.19632	1.61993	2.57452	0.604815	0.260111	0.619601	0.0292695	7.14894	0.470722	7.75348	0.386167	27.7766	728.392	1.15842	1.71088	7.14894	0.776004	0.118671	0.440607	8.91e-07	5	226	o
149	56	22	3.77378	0.277116	3.53553	4.30116	410.48	14.4889	9.14455	0.475969	-0.735919	0.0571981	1.50543	0.536956	2.62558	0.57337	34.0924	1104.1	0.93964	1.30978	1.50543	0.483277	0.135487	0.416333	0.0670611	4.02564	0.0709354	3.1665	0.453243	34.0256	1104.85	0.856293	1.2929	4.02564	0.657874	0.0962897	0.350139	1.09e-06	4	61	o
150	176	40	7.08137	0.846198	5.34912	8.48311	652.007	25.3781	17.8753	0.660883	0.409479	0.0508651	1.86846	0.725602	4.40466	0.583602	30.8764	898.208	1.10294	1.47052	1.86846	0.547276	0.239416	0.574145	0.0358936	5.04317	0.255682	4.38778	0.405074	30.4676	874.311	1.04309	1.57654	5.04317	0.709501	0.0777443	0.346017	1.16e-06	6	168	l
151	312	70	10.5099	3.46909	4.69722	17.3783	245.541	33.3037	33.8962	0.906132	0.658838	0.0237743	2.30268	0.845794	8.46626	0.559944	28.8562	786.696	1.30386	1.7541	2.30268	0.581983	0.293795	0.67337	0.0230931	5.87805	0.585426	8.08927	0.412457	28.1301	744.788	1.25427	1.79854	5.87805	0.749918	0.154444	0.50984	1.07e-06	5	708	o
152	227	47	8.04863	0.554881	6.47064	9.21129	478.322	28.9673	18.6029	0.318576	-1.11416	0.0423295	3.0097	0.809812	8.91244	0.526145	26.5515	670.339	1.21973	1.65042	3.0097	0.636891	0.275041	0.639703	0.0383137	8.94624	0.448724	9.11412	0.388056	25.871	633.709	1.16877	1.6961	8.94624	0.82356	0.129055	0.456761	1.51e-06	5	213	l
153	275	66	8.9685	2.63856	1.84581	12.7332	84.9036	33.9417	24.6911	0.678406	-0.992058	0.071313	0.798576	0.737739	2.52248	0.686165	33.7894	1083.1	0.959462	1.21394	0.798576	0.388494	0.252806	0.544264	0.0467553	2.13761	0.392416	2.75911	0.503022	33.4495	1061.16	0.949311	1.38109	2.13761	0.538558	0.0780334	0.32571	1.11e-06	4	339	c
154	250	51	8.57532	1.35485	6.47323	11.1435	554.348	31.7671	22.5127	0.735415	1.28035	0.0420781	1.55653	0.805564	5.00268	0.601795	30.7772	892.319	1.14839	1.50564	1.55653	0.512826	0.283332	0.625819	0.0288805	4.51691	0.460006	5.18237	0.429778	30.3333	865.616	1.12026	1.65709	4.51691	0.689007	0.106261	0.411944	1.55e-06	6	242	l
155	266	50	8.75734	0.537174	7.52066	9.66853	720.59	33.8692	20.4685	0.443097	0.224785	0.0331451	2.45791	0.825093	8.02634	0.522732	28.3162	760.136	1.21478	1.6412	2.45791	0.587274	0.264282	0.627166	0.0327374	7.43946	0.445079	7.70318	0.398289	27.7803	728.532	1.15023	1.65719	7.43946	0.795958	0.0874015	0.374897	7.43e-07	3	230	o
156	271	52	8.91741	1.19859	7.03733	11.4483	112.399	48.2915	22.972	0.6889	-1.45056	0.0599121	2.1665	0.800435	6.42805	0.59264	27.3148	705.119	1.13137	1.50934	2.1665	0.580849	0.261175	0.603775	0.0466396	5.45872	0.417975	5.68942	0.462595	26.422	656.252	1.0655	1.57054	5.45872	0.739884	0.0801707	0.350615	1.31e-06	8	264	c
157	229	59	8.40879	2.20157	4.01538	12.4371	416.825	43.0364	24.5755	0.838175	0.0566839	0.0345935	2.24201	0.786468	6.24984	0.546199	30.4214	873.963	1.17748	1.60868	2.24201	0.576158	0.239601	0.595492	0.0290586	6.91111	0.383494	6.60506	0.392905	29.8444	838.962	1.14857	1.69848	6.91111	0.78511	0.0765047	0.3555	1.5e-06	7	780	o
158	242	53	8.36211	1.15158	5.44215	10.7332	580.655	46.234	20.0325	0.498051	1.26605	0.0390732	2.124	0.797811	6.25251	0.584411	29.1894	802.408	1.19797	1.6149	2.124	0.575936	0.259449	0.618148	0.0365395	5.32161	0.492215	6.24003	0.453768	28.8593	783.717	1.14506	1.63592	5.32161	0.723649	0.141627	0.469777	1.66e-06	8	639	l
159	248	48	8.44105	0.424921	7.54193	9.46735	672.987	46.0069	19.5214	0.424925	-0.168674	0.0335889	2.87638	0.754171	6.85037	0.542163	27.5982	716.864	1.21001	1.6636	2.87638	0.621655	0.229349	0.591708	0.0275246	6.07538	0.365357	5.78645	0.421201	26.9296	679.254	1.11912	1.69381	6.07538	0.753015	0.110502	0.42394	1.21e-06	8	236	l
160	184	41	7.25675	0.666096	5.89901	8.6062	536.036	47.3531	18.057	0.619178	0.904573	0.0466304	2.68731	0.744941	6.26802	0.558826	28.7659	780.223	1.16444	1.58211	2.68731	0.614687	0.233392	0.584517	0.0327205	7.85714	0.335193	6.90934	0.405008	28.6234	770.908	1.14378	1.67851	7.85714	0.788609	0.119416	0.438156	1.79e-06	8	179	l
161	108	34	5.44431	1.09124	3.43312	7.44536	495.289	45.4081	14.9422	0.746604	0.273143	0.070485	1.56183	0.626325	3.08982	0.614342	32.7339	1014.49	0.989747	1.32751	1.56183	0.517807	0.190858	0.494255	0.0440958	3.89024	0.17839	3.36745	0.454525	32.8659	1023.88	0.955052	1.46244	3.89024	0.667907	0.0698027	0.316815	1.78e-06	9	84	o
162	75	29	4.41962	1.19088	1.71619	6.14877	153.45	50.0555	13.0888	0.799166	-1.10307	0.107042	0.681452	0.600242	1.85233	0.727016	35.2056	1185.89	0.808499	1.03204	0.681452	0.378078	0.176526	0.425582	0.0866908	1.42553	0.206501	1.89826	0.568085	34.7872	1159.58	0.766446	1.11554	1.42553	0.460094	0.0376173	0.204612	1.31e-06	5	87	c
163	309	60	9.68979	2.11289	5.69154	13.7548	377.51	57.44	27.0846	0.798222	-1.10809	0.0414698	1.75774	0.832548	6.24847	0.618561	30.4757	875.843	1.20783	1.58538	1.75774	0.542201	0.308553	0.662729	0.0312533	4.65637	0.558338	6.27142	0.476816	30.1622	855.672	1.19247	1.67623	4.65637	0.711368	0.150587	0.48876	1.47e-06	4	292	o
164	237	52	8.24953	1.23721	5.9752	10.2343	652.945	55.5436	21.4919	0.698393	1.41558	0.0456056	2.29569	0.744473	5.49207	0.577265	28.9825	791.691	1.12544	1.5284	2.29569	0.588742	0.226135	0.568094	0.0381872	6.2602	0.301998	5.48438	0.464172	28.75	776.969	1.08609	1.57324	6.2602	0.762214	0.0949359	0.380952	1.41e-06	7	223	l
165	410	69	11.1252	2.21284	7.4968	15.4512	38.0424	63.9016	30.1139	0.793466	-1.3788	0.0635917	0.778144	0.817763	3.13498	0.712837	32.8032	1017.7	1.02356	1.2744	0.778144	0.400586	0.315	0.615658	0.0417809	2.19764	0.52259	3.30163	0.534488	32.41	992.591	1.01605	1.45517	2.19764	0.565323	0.115981	0.405004	1.11e-06	5	719	c
166	190	49	7.48886	2.04924	3.40816	11.2605	405.471	58.9382	22.7865	0.859763	1.46197	0.048327	1.35259	0.739217	3.59333	0.643285	33.1156	1036.44	1.06223	1.40607	1.35259	0.494954	0.233114	0.556749	0.040491	3.41958	0.346724	3.61726	0.492626	32.6084	1005.33	1.01285	1.49251	3.41958	0.646617	0.0938649	0.36973	1.63e-06	7	188	o
167	432	72	11.2351	1.46479	7.34198	13.6418	709.773	61.0312	25.4091	0.320855	0.0416677	0.0503567	1.49844	0.832519	5.47347	0.639914	30.1659	858.409	1.14846	1.49905	1.49844	0.515754	0.291137	0.632434	0.0370257	3.94751	0.530549	5.2044	0.497617	29.6934	828.884	1.12742	1.63005	3.94751	0.67632	0.110368	0.416393	9.71e-07	5	399	o
168	415	73	11.1416	1.97355	6.05995	14.0414	179.679	68.6646	28.1154	0.664868	-0.936535	0.0468504	1.29188	0.829602	4.79079	0.666811	30.288	863.755	1.13519	1.46934	1.29188	0.482239	0.301057	0.637118	0.0319248	3.48747	0.566217	5.01982	0.503534	30.1448	855.366	1.11428	1.62499	3.48747	0.648428	0.12616	0.443313	1.4e-06	5	848	c
169	214	48	8.08383	2.14821	4.62505	11.1587	97.9065	67.0603	24.7523	0.861704	-1.03566	0.0293689	3.36328	0.754191	7.84126	0.509759	26.2643	649.736	1.24965	1.72553	3.36328	0.656863	0.229308	0.600337	0.0221981	9.02367	0.329523	7.72929	0.37905	25.3077	599.388	1.1935	1.77301	9.02367	0.837194	0.1011	0.414781	1.45e-06	7	211	c
170	356	66	10.6052	2.49667	4.88756	14.5761	490.417	68.9635	29.5529	0.808926	-0.713203	0.0799834	1.12193	0.75104	3.25324	0.689719	32.194	979.892	1.01708	1.30237	1.12193	0.469495	0.262477	0.570349	0.0548748	2.70227	0.428245	3.36313	0.537485	32.0615	972.537	0.984385	1.42429	2.70227	0.605821	0.0799914	0.334523	2.06e-06	10	605	o
171	663	106	13.5378	4.10037	2.71975	19.3742	216.752	72.6377	36.8449	0.626896	0.495227	0.0490515	0.935523	0.899966	5.67603	0.721991	32.6411	1008.27	1.16888	1.44162	0.935523	0.433646	0.394291	0.712298	0.0326743	2.40141	0.744155	5.69309	0.572226	32.3063	986.31	1.16249	1.60309	2.40141	0.577915	0.23117	0.585071	1.36e-06	6	661	c
172	348	59	10.1032	1.20804	7.04769	12.0673	147.841	72.9175	24.1061	0.552576	-1.18106	0.0424765	1.91291	0.724995	4.47795	0.577686	28.6392	769.094	1.12383	1.52683	1.91291	0.545409	0.21241	0.551644	0.0292074	5.36304	0.284626	4.74842	0.401257	28.4257	757.409	1.08021	1.66227	5.36304	0.723683	0.0495027	0.284453	1.48e-06	7	347	c
173	207	44	7.67821	0.405435	6.73146	8.38525	678.162	72.5404	17.0398	0.281889	0.0898929	0.0567985	1.68625	0.669719	3.55274	0.602364	31.3952	929.248	1.05177	1.41413	1.68625	0.526297	0.20012	0.519439	0.0492929	3.71515	0.219828	3.38098	0.467601	31.097	913.023	0.97698	1.47735	3.71515	0.665456	0.0480098	0.264753	1.3e-06	6	212	l
174	128	38	6.01566	1.48337	2.92105	8.22742	53.0283	76.8296	17.473	0.823299	1.5548	0.100225	0.761261	0.773456	2.68016	0.722072	34.3423	1122.28	0.931008	1.16654	0.761261	0.402013	0.276382	0.558657	0.0763161	1.5618	0.574916	2.83705	0.596629	33.9888	1098.43	0.933566	1.28741	1.5618	0.510746	0.169443	0.460502	1.31e-06	7	719	c
175	286	58	9.1235	1.23954	6.32874	10.9032	468.93	79.0057	22.3541	0.588695	-1.27696	0.0595272	1.58309	0.825999	5.5491	0.638357	30.0384	851.911	1.1369	1.46669	1.58309	0.523581	0.30761	0.642852	0.051925	3.93013	0.53787	5.25219	0.503446	29.4672	818.364	1.08969	1.54764	3.93013	0.676213	0.128072	0.436863	2.11e-06	7	264	o
176	256	52	8.78426	1.67703	5.90187	11.6712	117.154	82.0688	24.2076	0.791002	-0.920711	0.0474043	1.81009	0.801923	5.56914	0.594528	28.5161	764.578	1.16447	1.52025	1.81009	0.539173	0.285716	0.630517	0.0353306	4.6028	0.488455	5.49892	0.433917	28.1168	742.313	1.11829	1.62378	4.6028	0.699788	0.120077	0.432817	1.56e-06	7	274	c
177	314	73	10.3829	4.08074	4.01134	16.818	593.134	82.0584	36.974	0.948603	-0.0245527	0.0560029	1.40581	0.73571	3.6596	0.641461	31.5396	938.018	1.06364	1.39564	1.40581	0.503703	0.248292	0.571623	0.037656	3.74517	0.363759	3.9432	0.498439	31.3822	929.002	1.03467	1.51925	3.74517	0.671128	0.0913881	0.367968	1.9e-06	4	313	o
178	439	71	11.3977	1.29972	8.80028	13.9302	184.051	91.6258	28.1595	0.654941	-1.12265	0.0547311	1.43119	0.801436	4.60386	0.65202	28.5761	767.456	1.1085	1.43555	1.43119	0.505871	0.287419	0.618354	0.0436405	3.33973	0.417573	3.86708	0.510988	28.0137	736.542	1.02457	1.50165	3.33973	0.645146	0.0831171	0.349431	1.48e-06	6	848	c
179	87	30	4.92844	1.16019	2.57509	6.95446	18.4935	87.0546	14.2354	0.821033	-1.12802	0.172291	0.477816	0.515061	1.49266	0.777474	35.8498	1239.21	0.668676	0.824371	0.477816	0.323941	0.162194	0.367991	0.130972	0.95	0.109259	1.53326	0.645	35.8167	1238.83	0.636469	0.912028	0.95	0.402377	0.0138471	0.112412	1.05e-06	5	90	c
180	723	90	14.69	1.71509	10.8247	17.3493	245.236	98.2481	34.9514	0.615213	0.889803	0.0850625	0.723054	0.796482	2.77639	0.745735	32.6229	1006.24	1.00236	1.23767	0.723054	0.396657	0.319156	0.612377	0.0572905	1.88735	0.483401	2.8267	0.601563	32.483	998.371	0.971886	1.38817	1.88735	0.544765	0.111466	0.388773	1.44e-06	4	721	c
181	268	54	8.82864	1.3107	5.62929	11.2227	492.952	91.9824	21.8812	0.629392	-0.0748861	0.0893949	1.01331	0.752638	3.04822	0.683726	33.1709	1042.14	1.00008	1.27809	1.01331	0.448876	0.266966	0.570517	0.0801174	2.60092	0.348803	2.99703	0.557759	32.6927	1013.72	0.938394	1.35712	2.60092	0.609435	0.0821012	0.331202	2.25e-06	9	240	o
182	185	50	7.19398	1.61328	3.56707	10.3771	92.7832	93.3866	18.0012	0.546686	-0.742749	0.0459467	1.76923	0.685134	3.8095	0.57719	30.7877	892.488	1.07204	1.47528	1.76923	0.532588	0.182314	0.506131	0.0321589	4.55479	0.272851	4.13195	0.429098	30.4452	872.013	1.05065	1.60324	4.55479	0.701274	0.070676	0.332905	1.58e-06	6	433	c
183	354	65	10.2816	2.11936	6.19039	13.7951	280.494	98.6973	28.2844	0.78188	0.00251137	0.054528	1.53216	0.814639	5.13291	0.616859	29.7129	832.263	1.12505	1.44495	1.53216	0.516118	0.313637	0.644809	0.048147	4.28956	0.428237	4.75117	0.499718	29.1246	798.218	1.0621	1.51408	4.28956	0.689751	0.126644	0.430253	1.47e-06	5	329	c
184	184	45	7.30352	1.35968	4.88409	9.67637	11.5454	105.295	19.7371	0.768739	-1.14545	0.0801218	0.90411	0.800704	3.26826	0.702981	31.6621	948.354	0.99966	1.25558	0.90411	0.428447	0.316453	0.613399	0.0542687	2.33793	0.480416	3.24981	0.548114	31.3724	930.212	0.98244	1.39994	2.33793	0.581189	0.125631	0.41365	1.03e-06	4	363	c
185	241	55	8.77521	2.25484	4.56494	12.8842	88.9766	109.094	25.1911	0.858543	0.981614	0.0536691	1.82814	0.645446	3.57809	0.621406	30.218	858.793	1.05794	1.4323	1.82814	0.54519	0.199315	0.521273	0.0473588	3.3224	0.266417	3.2645	0.495264	29.6831	830.183	0.969876	1.46444	3.3224	0.645322	0.0879675	0.355058	1.63e-06	6	433	c
186	466	83	11.8229	2.50303	6.71111	15.1587	38.9608	118.645	30.0711	0.663516	-0.765566	0.0514615	1.08911	0.850687	4.64707	0.673171	30.3273	865.804	1.13305	1.43064	1.08911	0.457616	0.327022	0.654517	0.0355161	2.78788	0.637757	4.84808	0.510377	30.0404	848.948	1.12081	1.57452	2.78788	0.609461	0.154033	0.480706	1.35e-06	6	12223	c
187	152	49	6.88728	2.27435	2.62346	11.0705	296.388	117.776	21.7774	0.883722	-0.579907	0.0575166	1.63269	0.652033	3.34604	0.595572	33.0212	1032.28	1.01289	1.38233	1.63269	0.521711	0.173916	0.481137	0.0444249	3.34615	0.260271	3.26174	0.473982	32.6731	1011.42	0.960018	1.46301	3.34615	0.639442	0.0497263	0.268123	1.58e-06	6	417	c
188	74	28	4.44504	1.14029	1.96721	5.90507	156.185	119.815	12.9	0.797328	-0.595298	0.210091	0.565574	0.532749	1.60521	0.766393	35.8525	1238.12	0.691951	0.877967	0.565574	0.357466	0.155279	0.370677	0.158063	1.45283	0.0407803	1.7573	0.613208	35.6792	1226.66	0.678086	0.962654	1.45283	0.501515	0.0223381	0.14667	1.6e-06	4	236	c
189	106	37	5.4119	1.14723	3.21156	7.53841	153.796	130.929	13.9771	0.617982	-1.22301	0.150915	0.498599	0.610066	1.63934	0.764146	35.5798	1214.65	0.757492	0.918279	0.498599	0.322901	0.204678	0.434641	0.0979836	1.15942	0.235245	1.75803	0.611594	35.4783	1209.06	0.73368	1.04674	1.15942	0.432827	0.0495687	0.227626	1.62e-06	4	236	c
190	256	54	8.67192	1.76377	6.03707	11.4294	299.339	130.302	24.1086	0.803148	-0.0315742	0.0471557	1.28172	0.831258	4.79788	0.650829	30.9548	903.61	1.12699	1.4537	1.28172	0.4797	0.304031	0.637332	0.0342987	2.57282	0.627636	4.45471	0.498603	30.5631	879.325	1.09993	1.56223	2.57282	0.582296	0.16916	0.500749	1.63e-06	6	417	c
191	368	64	10.3706	1.07492	7.62188	12.3819	602.142	136.436	25.2955	0.559058	0.378235	0.0557956	2.90103	0.793904	8.03804	0.588339	24.8365	584.439	1.18935	1.58434	2.90103	0.618844	0.265775	0.620225	0.0438456	7.45741	0.458563	7.88668	0.456942	24.4038	560.541	1.15618	1.65633	7.45741	0.774249	0.130228	0.453918	1.94e-06	6	371	c
192	416	97	11.1686	3.62943	5.10385	19.6733	261.12	136.482	34.8682	0.855832	-0.200404	0.0897258	0.909333	0.63619	2.24974	0.707733	34.7107	1147.33	0.898799	1.1833	0.909333	0.434394	0.191035	0.470254	0.0752246	1.89688	0.231948	2.23486	0.599283	34.4656	1133.53	0.842916	1.27282	1.89688	0.550692	0.0558389	0.265529	1.56e-06	8	411	c
193	182	50	7.41354	2.49156	1.99289	11.3654	638.643	138.974	23.5289	0.876156	0.116674	0.238566	0.393417	0.483115	1.38057	0.816458	37.1301	1336.43	0.588376	0.716763	0.393417	0.305233	0.146644	0.327459	0.203841	0.637037	0.164026	1.38102	0.717037	37.0963	1336.32	0.55274	0.753109	0.637037	0.349073	0.0429873	0.180399	1.68e-06	6	84	c
194	262	64	8.99456	2.26509	3.07181	13.8112	53.03	144.41	24.4086	0.753971	-0.424219	0.146082	0.543103	0.738288	2.0376	0.796678	28.4784	766.697	0.854376	1.03065	0.543103	0.349079	0.320457	0.570239	0.118962	0.785	0.587274	1.95099	0.7275	28.355	760.004	0.841646	1.07752	0.785	0.409191	0.184204	0.44314	1.52e-06	5	12223	c
195	197	49	7.69563	1.98644	4.71588	11.2538	426.961	146.776	23.063	0.854431	-1.50498	0.0340044	2.31339	0.743069	5.50198	0.568865	31.2934	922.987	1.17215	1.60959	2.31339	0.575635	0.223633	0.57724	0.0285328	4.8	0.449499	5.35967	0.413099	30.9935	906.343	1.09866	1.65597	4.8	0.709834	0.114848	0.427455	2.22e-06	7	180	c
196	588	94	14.3911	4.33113	6.68195	22.4672	286.937	150.979	43.8017	0.884715	-0.489308	0.053157	1.46615	0.858871	6.19436	0.650345	30.4963	880.184	1.15571	1.49431	1.46615	0.510466	0.314446	0.653746	0.0366042	3.85573	0.638646	6.33512	0.487203	30.1522	859.045	1.14251	1.65335	3.85573	0.676777	0.13659	0.463945	1.66e-06	6	583	c
197	314	56	9.56038	1.08768	7.04108	11.573	742.098	149.513	23.8569	0.651945	1.22751	0.043512	2.23575	0.780594	6.095	0.600621	28.405	759.524	1.17671	1.57289	2.23575	0.577974	0.255643	0.607754	0.0347555	5.62357	0.471335	6.31866	0.464079	28.1027	742.778	1.13737	1.65745	5.62357	0.737589	0.13874	0.467903	7.06e-07	2	297	l
198	122	37	5.84574	0.860449	3.72434	7.52153	447.098	148.519	14.2547	0.555951	-0.857705	0.108353	0.587678	0.710377	2.01455	0.740284	36.1327	1246.73	0.872758	1.06984	0.587678	0.348483	0.257392	0.520549	0.0927169	1.29545	0.376662	2.03913	0.597727	35.8409	1229.07	0.82362	1.15824	1.29545	0.455379	0.0950008	0.3303	2.29e-06	8	207	c
199	296	57	9.34193	1.69283	6.16039	12.5343	529.686	156.951	25.2438	0.759696	-1.37834	0.0725761	2.15867	0.756486	5.43233	0.621466	28.8469	785.117	1.10617	1.46473	2.15867	0.579945	0.260113	0.595521	0.0520708	5.26471	0.331085	4.93526	0.505577	28.2563	750.928	1.04506	1.53887	5.26471	0.713594	0.108593	0.402459	2.3e-06	11	278	c
200	399	66	11.0211	1.88175	7.80602	14.5142	223.29	159.687	29.6205	0.781913	1.04443	0.0361447	1.33424	0.844783	5.29798	0.626315	29.4032	811.597	1.19439	1.54767	1.33424	0.486853	0.310532	0.658692	0.0235558	3.63372	0.572088	5.24588	0.464224	29.0698	792.343	1.15932	1.71364	3.63372	0.654679	0.110086	0.425407	1.56e-06	4	952	c
201	213	58	8.76836	3.29301	3.42601	15.1024	58.5316	162.864	29.9313	0.943778	-1.21675	0.119193	0.69571	0.608739	1.88906	0.750268	28.2105	753.782	0.807518	1.03419	0.69571	0.391937	0.192378	0.444506	0.109802	1.10323	0.312175	1.80197	0.641935	27.929	741.329	0.740354	1.03985	1.10323	0.446828	0.051014	0.230174	1.6e-06	6	12223	c
202	364	62	10.3952	1.47792	7.98467	13.7047	402.864	160.018	26.4585	0.694068	1.26713	0.0522703	1.81528	0.761859	4.81136	0.610222	28.9177	786.67	1.11047	1.47185	1.81528	0.548744	0.247839	0.583583	0.0378946	4.86392	0.387918	4.97326	0.471306	28.7373	776.49	1.07038	1.60196	4.86392	0.717007	0.0721817	0.336222	2.13e-06	9	358	c
203	681	97	14.2555	2.88074	6.95261	19.1895	204.77	169.1	39.0314	0.754387	0.90292	0.0437179	1.16569	0.942977	11.2212	0.680182	28.7889	798.064	1.25082	1.53523	1.16569	0.474751	0.441339	0.762102	0.0299059	3.56478	0.824318	11.1456	0.520875	28.4983	779.217	1.255	1.69246	3.56478	0.666899	0.271799	0.642479	1.59e-06	3	952	c
204	460	75	11.8281	2.41051	6.23163	16.2712	613.224	166.295	31.473	0.740913	1.21878	0.0703736	1.98657	0.746959	4.92538	0.612458	27.5018	712.114	1.0745	1.44033	1.98657	0.563427	0.222788	0.550546	0.0530654	5.08333	0.34784	4.8973	0.471832	27.1641	694.088	1.01874	1.54073	5.08333	0.706919	0.0614437	0.305042	1.84e-06	7	454	c
205	107	38	5.44469	1.17513	2.78164	7.54988	443.211	161.261	14.7316	0.709345	1.5109	0.0872955	0.791667	0.645947	2.11801	0.690833	36.2361	1253.83	0.878715	1.13426	0.791667	0.390506	0.201124	0.47331	0.0729547	1.62162	0.237244	2.063	0.562162	36.1351	1251.22	0.799754	1.20876	1.62162	0.487579	0.0546463	0.256233	2.28e-06	7	207	c
206	364	66	10.5006	2.62281	3.88024	14.9259	551.416	167.205	28.9598	0.780662	-1.36102	0.0524817	1.46901	0.747821	3.91263	0.629508	31.823	955.156	1.08257	1.43906	1.46901	0.507548	0.228687	0.557097	0.0398404	3.66343	0.394374	4.0245	0.492245	31.7605	952.21	1.03959	1.55417	3.66343	0.662891	0.0774383	0.343045	2.19e-06	9	332	c
207	191	44	7.45142	1.0675	5.75409	9.68224	657.688	164.755	18.6656	0.692368	-0.866219	0.077592	0.795918	0.767715	2.71324	0.717493	35.137	1172.83	0.978929	1.23637	0.795918	0.410086	0.270975	0.566807	0.0519899	2.2293	0.400109	2.85809	0.551425	35.1975	1177.97	0.951705	1.39428	2.2293	0.556473	0.0852107	0.341619	1.5e-06	6	164	c
208	248	58	9.0679	2.96342	3.8473	13.8517	75.7581	170.831	29.5897	0.91619	-1.10745	0.0358945	1.66742	0.814313	5.48984	0.570506	30.1169	854.942	1.1574	1.53408	1.66742	0.51076	0.274684	0.621642	0.0262741	4.18905	0.512942	5.30036	0.397605	29.7313	831.935	1.11452	1.64987	4.18905	0.654563	0.115174	0.427323	1.73e-06	7	249	c
209	300	58	9.72623	2.37733	5.47476	13.9522	381.593	172.494	28.1938	0.854769	0.663128	0.0419979	1.64325	0.790824	4.9279	0.606538	31.2418	918.13	1.17416	1.5691	1.64325	0.525819	0.260455	0.612304	0.0306285	4.42213	0.431909	4.89209	0.446481	30.7664	889.502	1.12933	1.68238	4.42213	0.691467	0.0993113	0.401525	2.06e-06	4	294	c
210	480	74	12.364	2.48901	7.9222	16.946	352.159	178.29	33.7194	0.803524	0.787555	0.0435005	1.44663	0.854067	5.9565	0.656968	29.823	838.635	1.18292	1.52254	1.44663	0.504355	0.334569	0.676451	0.0355875	3.2125	0.659178	5.71287	0.530588	29.2975	808.649	1.13707	1.61369	3.2125	0.641269	0.183873	0.527958	1.95e-06	3	507	c
211	506	76	12.4563	2.62505	7.25769	17.2105	30.6751	180.993	34.2694	0.783531	-0.964145	0.0314064	1.42956	0.894358	7.76603	0.623246	29.1001	800.458	1.26446	1.6347	1.42956	0.500627	0.352541	0.709384	0.0208012	4.24074	0.67643	7.55305	0.454075	28.5278	766.853	1.23527	1.81254	4.24074	0.68735	0.168063	0.531902	1.36e-06	5	476	c
212	445	83	12.5922	4.78733	2.56692	19.4248	568.541	183.989	43.3123	0.929269	-0.957699	0.0624224	2.34415	0.681737	4.68273	0.594833	28.289	752.045	1.09237	1.48731	2.34415	0.588936	0.196462	0.526091	0.0504646	5.86387	0.252583	4.92276	0.463451	28.2984	753.073	1.03589	1.53356	5.86387	0.723901	0.0623245	0.306501	2.06e-06	7	446	c
213	292	58	9.35525	2.30863	5.46095	12.8973	640.589	178.241	27.8519	0.847246	1.28103	0.0354953	2.53421	0.805997	7.53135	0.552154	28.1068	746.866	1.21307	1.6604	2.53421	0.605921	0.244744	0.608793	0.0289	7.1281	0.427377	7.22408	0.418541	27.5496	714.148	1.16057	1.727	7.1281	0.783261	0.0983437	0.404448	1.63e-06	6	270	c
214	644	90	14.1717	2.70711	9.23591	19.7138	252.515	185.242	36.6168	0.713232	1.43315	0.0494675	1.20008	0.853493	5.09564	0.669673	32.0421	971.14	1.12353	1.44149	1.20008	0.476228	0.311082	0.641867	0.0396277	3.14156	0.609932	5.02694	0.535771	31.6969	948.887	1.10409	1.54821	3.14156	0.642627	0.126487	0.434333	1.68e-06	5	606	c
215	725	97	15.5858	4.85529	6.15981	23.4588	103.991	187.88	48.1458	0.886699	-0.465863	0.0526419	1.08364	0.866847	5.06915	0.697083	29.6141	825.192	1.15361	1.4534	1.08364	0.462007	0.352058	0.68014	0.0389797	2.68643	0.654302	4.88551	0.557768	29.2917	805.734	1.13364	1.59691	2.68643	0.603679	0.167371	0.502988	1.87e-06	5	4030	c
216	326	66	10.2414	3.22725	4.06044	15.6303	673.138	192.057	32.4052	0.89831	-1.27755	0.0515187	2.08747	0.712749	4.63352	0.591678	29.8099	836.042	1.11158	1.52471	2.08747	0.57108	0.21532	0.554815	0.0576276	4.71429	0.32266	4.48	0.513708	29.6917	830.572	1.03224	1.50417	4.71429	0.709305	0.0777991	0.338583	1.36e-06	5	320	c
217	369	64	10.6431	2.38465	6.71455	14.6519	592.142	194.612	30.5879	0.833382	-0.318328	0.0478822	2.02349	0.834341	7.10743	0.603315	28.8032	785.079	1.1867	1.56758	2.02349	0.566106	0.287676	0.63989	0.0365433	4.78135	0.595175	6.90545	0.47128	28.3569	758.489	1.16043	1.65706	4.78135	0.706671	0.147022	0.480855	1.91e-06	5	329	c
218	502	81	12.5864	3.33656	6.82806	17.8659	298.662	203.789	36.3622	0.83396	1.25827	0.0509249	1.68486	0.762477	4.54672	0.662582	28.9026	783.538	1.13508	1.49638	1.68486	0.529812	0.269042	0.609892	0.0401718	3.43807	0.453956	4.14817	0.532652	28.6766	771.212	1.07122	1.58178	3.43807	0.649899	0.110664	0.411271	1.86e-06	5	492	c
219	768	98	15.6684	3.42905	9.04177	22.6423	126.471	206.417	41.5352	0.751067	-0.168988	0.0463476	1.16471	0.866476	5.36142	0.690179	28.8643	782.435	1.18481	1.49098	1.16471	0.470631	0.358327	0.69167	0.0320329	2.71723	0.671683	5.13812	0.550211	28.5729	765.481	1.15675	1.63522	2.71723	0.61099	0.173266	0.516431	1.96e-06	5	4030	c
220	277	56	9.20954	2.35775	5.23044	13.4616	474.481	196.41	27.1007	0.850544	0.341025	0.0400145	1.51338	0.799412	4.77236	0.593593	30.5045	875.724	1.1421	1.50816	1.51338	0.501905	0.274476	0.617328	0.0272793	4.54468	0.445529	5.09822	0.409018	30.2894	862.956	1.11561	1.6488	4.54468	0.692342	0.106614	0.411659	2.32e-06	8	282	c
221	275	51	9.1137	1.45628	6.62261	11.6019	335.784	201.092	23.9773	0.74212	0.712412	0.0516069	2.16501	0.764985	5.60611	0.584547	28.7932	781.051	1.13838	1.5271	2.16501	0.579817	0.244576	0.588708	0.0370057	5.63519	0.395104	5.65798	0.448779	28.4936	763.422	1.09968	1.63	5.63519	0.746427	0.080706	0.357913	1.96e-06	6	267	c
222	162	42	6.86562	1.40293	4.42018	9.27181	53.433	201.187	19.1795	0.807248	-0.461192	0.0548219	1.11324	0.742877	3.1648	0.652439	33.2491	1046.15	1.0218	1.34278	1.11324	0.453974	0.231008	0.54388	0.0359763	3.09231	0.432216	3.72314	0.452398	33.1231	1038.63	1.01651	1.50182	3.09231	0.59925	0.0894505	0.362199	1.66e-06	8	142	c
223	467	80	12.6429	3.70423	7.14397	19.0561	646.157	210.525	37.4419	0.894384	0.485817	0.0485512	1.28778	0.833387	4.86458	0.670286	32.8859	1021.34	1.15003	1.4859	1.28778	0.479845	0.305647	0.64418	0.0369428	2.97692	0.603929	4.75807	0.53357	32.7769	1014.59	1.11415	1.59436	2.97692	0.595805	0.160229	0.492427	1.57e-06	8	421	c
224	263	51	8.79015	1.29433	6.68179	11.2311	730.49	217.61	23.0835	0.728009	1.2244	0.0496859	2.38046	0.760564	5.97097	0.590045	27.0769	688.64	1.17061	1.55697	2.38046	0.590753	0.258404	0.608268	0.0406789	5.90411	0.396989	5.89552	0.455261	26.7808	672.415	1.11495	1.61736	5.90411	0.748888	0.0952173	0.386397	8.15e-07	2	263	l
225	488	98	12.5288	4.54701	3.77526	21.2374	36.7734	231.423	42.7192	0.918867	1.21015	0.0504144	1.86734	0.782701	5.29671	0.623157	29.1152	797.362	1.15021	1.52834	1.86734	0.550361	0.259859	0.605375	0.042904	4.34988	0.453281	4.97817	0.496222	28.5484	765.571	1.08917	1.60575	4.34988	0.692003	0.102682	0.399424	1.51e-06	7	1280	c
226	431	78	12.2695	3.53464	7.12825	18.9234	143.58	229.47	36.0381	0.890814	-0.83258	0.213041	0.402401	0.665372	1.60127	0.822299	28.8497	793.66	0.713244	0.847097	0.402401	0.312061	0.27724	0.488503	0.185181	0.77933	0.328991	1.58071	0.731006	28.6899	785.464	0.691357	0.920081	0.77933	0.410357	0.0722028	0.258068	2.08e-06	8	4030	c
227	438	71	11.4944	1.54116	8.21609	14.6282	57.2482	225.183	28.2842	0.679161	-0.975342	0.0392144	1.44076	0.8702	6.54991	0.680129	30.7311	892.364	1.20816	1.5393	1.44076	0.488538	0.348377	0.691105	0.0272571	2.75676	0.737208	6.24514	0.536986	30.6	883.757	1.18005	1.65889	2.75676	0.612216	0.2154	0.574443	1.75e-06	7	1280	c
228	614	82	13.9296	3.08903	8.63192	18.8763	620.342	226.983	39.2662	0.823483	-0.519899	0.0383143	1.12554	0.918186	7.87867	0.648658	30.2641	868.614	1.24296	1.54917	1.12554	0.456892	0.396474	0.731549	0.0292302	3.53663	0.738857	7.77145	0.481157	29.9029	846.084	1.22306	1.71022	3.53663	0.661007	0.198292	0.560092	1.7e-06	5	546	c
229	151	38	6.61365	0.987786	4.73172	8.31421	95.737	224.335	17.3028	0.736566	0.749586	0.038697	1.36381	0.788982	4.2315	0.61059	32.5354	998.612	1.1181	1.48318	1.36381	0.480263	0.253905	0.591919	0.0293378	4.17797	0.362613	4.27742	0.420326	32.161	975.421	1.0726	1.5975	4.17797	0.666052	0.0827535	0.358912	2.02e-06	11	127	c
230	357	68	10.5183	2.83223	5.46303	15.3572	475.023	239.007	31.0124	0.868915	-1.48665	0.0585869	1.08779	0.760822	3.27401	0.688103	33.4771	1059.76	1.04637	1.35809	1.08779	0.454656	0.255915	0.573332	0.0414171	2.32215	0.450636	3.11349	0.523599	33.396	1056.31	0.989503	1.46233	2.32215	0.57147	0.0761929	0.330719	2.3e-06	9	1070	c
231	413	69	11.2782	2.53732	6.44382	16.2093	391.362	237.694	30.6112	0.798428	1.48529	0.0434199	1.23057	0.857452	5.31632	0.667323	33.13	1038.03	1.16126	1.49047	1.23057	0.470598	0.324349	0.662137	0.0323502	3.45355	0.627113	5.63083	0.501964	33.082	1035.21	1.1423	1.63411	3.45355	0.645724	0.159825	0.497117	2.2e-06	6	396	c
232	288	63	9.54015	2.48185	5.03643	14.1455	451.569	241.958	28.4842	0.863885	1.35436	0.0486791	2.53839	0.74756	6.0277	0.568437	27.5058	712.133	1.15124	1.55715	2.53839	0.602699	0.230624	0.577615	0.0403285	6.5041	0.373895	6.1941	0.445322	27.3975	705.354	1.1091	1.63506	6.5041	0.76281	0.085844	0.369335	2.31e-06	9	1070	c
233	254	55	8.91977	2.26611	4.94816	12.8711	84.0522	240.746	26.1649	0.855132	1.05549	0.0495262	1.46783	0.789288	4.48303	0.637151	31.241	919.628	1.12185	1.48287	1.46783	0.509134	0.264194	0.60271	0.0308455	3.62019	0.464078	4.37754	0.479674	30.7067	887.451	1.08308	1.62469	3.62019	0.657693	0.113774	0.421883	2.01e-06	9	503	c
234	57	22	3.8302	0.453429	2.95979	4.55635	686.271	235.967	9.75456	0.623332	-1.14027	0.0946267	0.946524	0.487556	1.92354	0.65508	34.9679	1169.15	0.815327	1.10471	0.946524	0.411958	0.113357	0.352586	0.0883488	1.94444	-0.176471	1.82639	0.527778	34.5	1145.69	0.672098	1.09953	1.94444	0.527293	0.0265859	0.170854	1.27e-06	6	51	c
235	409	69	11.4837	2.74141	6.99893	16.459	653.414	243.493	32.5654	0.845652	-0.500535	0.0567766	1.8712	0.73416	4.51942	0.628804	28.9835	788.74	1.11713	1.48414	1.8712	0.549558	0.240226	0.577196	0.0424225	4.11111	0.417191	4.52698	0.507881	28.8575	781.882	1.07472	1.55721	4.11111	0.685632	0.0948221	0.378934	1.53e-06	6	406	c
236	334	58	9.96568	1.3486	7.01877	12.4729	66.4496	248.424	24.5701	0.638195	0.907411	0.0423137	1.78264	0.788717	5.21862	0.616807	28.717	774.112	1.16662	1.54118	1.78264	0.538225	0.265075	0.612854	0.0289747	4.52397	0.486435	5.40448	0.457772	28.339	753.31	1.13212	1.66434	4.52397	0.703169	0.103317	0.407227	1.88e-06	12	1280	c
237	326	59	9.82637	1.58918	7.07478	13.2493	531.996	247.067	25.537	0.706028	0.0529164	0.042883	1.57417	0.832397	5.69612	0.615093	29.8975	842.231	1.17432	1.53374	1.57417	0.520929	0.304965	0.651259	0.0323306	4.24727	0.529562	5.51417	0.472724	29.6073	825.133	1.12353	1.62852	4.24727	0.69312	0.133304	0.455545	2.09e-06	6	291	c
238	282	53	9.15505	1.4746	6.10067	12.2147	430.557	251.246	23.7468	0.685868	-1.23896	0.041247	2.25412	0.79698	6.55148	0.57803	27.4627	709.185	1.20941	1.59885	2.25412	0.582578	0.282147	0.639191	0.0317865	5.52137	0.505797	6.58613	0.444302	26.9231	680.023	1.17042	1.69567	5.52137	0.736442	0.134851	0.466313	2.29e-06	11	281	c
239	276	60	9.15598	2.59315	5.35664	13.9329	495.46	254.722	28.6515	0.875925	1.41559	0.048944	2.53693	0.751779	6.11022	0.574922	28.6367	773.436	1.14978	1.55898	2.53693	0.606577	0.237792	0.586035	0.03408	6.01786	0.41673	6.15872	0.421078	28.3393	755.988	1.11115	1.68371	6.01786	0.754985	0.0858285	0.374357	2.23e-06	11	258	c
240	54	21	3.74695	0.522788	2.93118	4.60035	514.211	247.249	9.75438	0.652941	0.939716	0.0468911	1.625	0.681543	3.55136	0.5625	33.8523	1085.65	1.0336	1.39333	1.625	0.500334	0.198889	0.514662	0.0493164	5.25	0.0344828	3.71875	0.372342	33.5	1065.68	0.941508	1.33931	5.25	0.711149	0.0316685	0.20538	2.17e-06	7	42	c
241	223	58	8.39487	2.75453	2.321	13.2382	18.0924	251.293	25.6327	0.843213	0.12768	0.24734	0.368354	0.546251	1.4059	0.826456	36.5861	1293.49	0.638343	0.757031	0.368354	0.296759	0.194085	0.387518	0.21293	0.698225	0.138128	1.40506	0.736095	36.4497	1286.49	0.59489	0.828526	0.698225	0.387782	0.0182425	0.123036	1.25e-06	5	747	c
242	264	54	8.84508	1.64549	6.00783	12.1785	408.688	257.088	22.3038	0.672396	1.15296	0.053524	1.27842	0.706719	3.1795	0.644725	33.3514	1051.9	1.0333	1.38645	1.27842	0.478754	0.204644	0.520569	0.0378783	2.69014	0.412968	3.29131	0.476955	33.1502	1039.97	1.00226	1.50889	2.69014	0.581031	0.0798601	0.343446	2.24e-06	10	262	c
243	204	50	7.80912	1.88012	3.21602	11.9692	131.49	254.061	20.1343	0.637188	1.39292	0.163989	0.533058	0.622597	1.70622	0.791322	28.5882	776.094	0.770854	0.948996	0.533058	0.352772	0.229102	0.466606	0.150859	0.9375	0.267891	1.64027	0.70375	28.4625	772.408	0.699504	0.980699	0.9375	0.438438	0.0562933	0.234994	2.23e-06	10	4030	c
244	326	71	9.84495	1.7738	6.38999	12.8305	462.632	260.301	23.8915	0.548819	-0.604994	0.0359372	1.80678	0.855035	7.23177	0.612944	28.7237	778.488	1.23978	1.62426	1.80678	0.547699	0.308684	0.668784	0.0342112	4.65926	0.596139	6.7684	0.497303	28.3111	753.687	1.19519	1.68282	4.65926	0.702819	0.165754	0.512097	2.29e-06	11	1070	c
245	272	56	9.00991	1.84362	6.04545	12.2741	91.4322	262.42	25.2449	0.803885	1.2481	0.0345868	1.45556	0.863668	6.33827	0.607695	31.2071	920.477	1.19742	1.56157	1.45556	0.500456	0.315303	0.665302	0.0235371	4.38393	0.60001	6.48005	0.438033	30.6875	888.482	1.17571	1.70735	4.38393	0.694843	0.152046	0.494911	2.1e-06	10	503	c
246	179	48	7.3179	2.15904	3.9654	10.6759	109.305	264.814	23.1988	0.893625	1.54122	0.0583522	1.1041	0.770798	3.40858	0.655929	32.7981	1017.29	1.03708	1.33496	1.1041	0.456306	0.266024	0.579737	0.038706	2.86713	0.454889	3.62986	0.484574	32.6014	1005.45	1.01343	1.48499	2.86713	0.6073	0.0912969	0.36391	2.21e-06	12	154	c
247	534	87	13.0663	3.96813	4.42529	20.057	26.2786	276.905	39.5887	0.842619	1.43908	0.0497156	1.75617	0.825069	6.01961	0.633281	28.2156	749.794	1.16988	1.53312	1.75617	0.537902	0.291909	0.63864	0.0349887	4.45916	0.52622	5.70594	0.488804	27.6336	717.07	1.12496	1.63985	4.45916	0.689369	0.127939	0.448102	1.32e-06	6	747	c
248	345	92	10.501	2.4586	6.17668	16.3674	134.117	274.103	27.4939	0.730895	1.39321	0.0721304	0.801471	0.807334	3.07994	0.720833	33.0221	1031.79	1.01783	1.25694	0.801471	0.412451	0.326438	0.622563	0.0507545	1.97037	0.522413	3.06284	0.589978	32.6444	1008.51	0.986409	1.3779	1.97037	0.558831	0.128995	0.415979	2.3e-06	10	4030	c
249	382	64	10.6394	1.41289	8.47019	13.9214	202.575	271.98	26.9089	0.682751	-1.56169	0.0490359	1.67138	0.816567	5.55583	0.61101	29.1329	800.142	1.14019	1.50461	1.67138	0.528717	0.271575	0.613804	0.0437689	4.30671	0.455725	4.95637	0.453993	28.4473	761.206	1.06687	1.57718	4.30671	0.692512	0.0894671	0.37057	2.26e-06	8	1520	c
250	322	62	9.77851	1.90736	5.41957	12.8747	288.477	269.057	27.1932	0.770384	-0.267802	0.0345787	2.30991	0.842227	8.32035	0.554396	27.6884	725.906	1.25103	1.65339	2.30991	0.58629	0.307187	0.671732	0.0216463	7.02545	0.524652	8.3898	0.40693	27.3527	705.054	1.22764	1.78498	7.02545	0.778145	0.136754	0.480109	2.14e-06	9	311	c
251	158	50	6.62388	1.45472	3.60111	9.66685	450.6	272.276	17.009	0.587225	1.4336	0.0285416	2.27206	0.775577	6.06201	0.528061	30.386	870.549	1.18717	1.62959	2.27206	0.567827	0.231402	0.589205	0.0260849	6.25439	0.370695	5.96928	0.365497	29.6754	829.363	1.11427	1.67544	6.25439	0.750204	0.139357	0.471121	2.27e-06	11	1070	c
252	370	61	10.6848	1.87636	6.84031	14.2703	326.882	275.064	27.6484	0.750315	-0.599657	0.0454694	1.22953	0.844793	4.96095	0.67468	31.7383	950.413	1.14748	1.47674	1.22953	0.476563	0.316204	0.652474	0.0344013	2.66667	0.629171	4.59555	0.528129	31.2929	923.534	1.09659	1.5607	2.66667	0.606892	0.150733	0.473958	2.15e-06	9	1316	c
253	669	88	14.2177	1.43461	11.4962	17.959	257.383	280.105	31.9887	0.417641	1.14586	0.0573289	1.59857	0.836243	5.88093	0.666627	27.6975	721.865	1.16569	1.50808	1.59857	0.516412	0.320432	0.661466	0.0405633	3.91433	0.584543	5.71088	0.515753	27.4465	707.233	1.1348	1.6404	3.91433	0.677075	0.137255	0.463402	2.22e-06	10	1676	c
254	322	59	9.76496	1.59027	6.57664	13.0941	395.671	279.27	25.1581	0.703956	1.34089	0.0516081	2.28994	0.706362	4.89926	0.604215	28.3221	753.565	1.11438	1.50086	2.28994	0.584648	0.2157	0.551655	0.0411202	4.76692	0.316838	4.48886	0.478476	27.8797	729.464	1.04175	1.54632	4.76692	0.707615	0.0701655	0.326117	2.2e-06	8	318	c
255	228	49	8.07213	0.937561	6.06617	9.73854	416.209	277.116	20.6776	0.648516	1.50339	0.0366909	2.63362	0.810587	7.95205	0.552227	27.5405	716.904	1.23976	1.6314	2.63362	0.607146	0.302486	0.663995	0.028499	6.85714	0.483625	7.63969	0.413315	26.8462	678.161	1.1857	1.66034	6.85714	0.772283	0.128578	0.451659	2.23e-06	11	225	c
256	510	78	12.4946	2.40631	6.91744	16.3779	67.8947	282.814	32.3258	0.758472	0.527814	0.217879	0.330526	0.725082	1.60114	0.850526	29.3695	822.764	0.721784	0.837324	0.330526	0.285197	0.32701	0.528353	0.160553	0.632287	0.518569	1.65667	0.750805	29.3229	818.403	0.750008	0.955819	0.632287	0.367767	0.145125	0.372718	1.86e-06	7	1172	c
257	202	46	7.87782	1.9004	4.97845	11.2193	226.457	281.311	22.6972	0.841383	1.10119	0.0405169	2.15193	0.710283	4.71386	0.578324	30.9696	904.273	1.11045	1.52854	2.15193	0.566665	0.211203	0.550442	0.0309595	4.68519	0.370806	4.72317	0.44856	30.7593	891.647	1.07022	1.63749	4.68519	0.710563	0.115381	0.42624	2.27e-06	9	191	c
258	282	58	9.28213	2.25608	5.3621	13.7863	442.073	284.738	25.9591	0.798454	1.105	0.0473676	1.70996	0.774958	4.7992	0.612073	30.3486	867.649	1.12259	1.49487	1.70996	0.535526	0.234953	0.572994	0.0382228	3.47706	0.43465	4.07514	0.483586	29.6789	829.296	1.035	1.54529	3.47706	0.654272	0.0890337	0.366206	2.23e-06	11	270	c
259	454	77	11.6044	2.09658	7.4324	16.1461	481.134	289.195	29.2415	0.621302	1.44491	0.0828901	1.3724	0.811265	4.63577	0.66451	30.1743	859.909	1.07553	1.4034	1.3724	0.502357	0.287121	0.612621	0.0789988	3.56218	0.481039	4.43203	0.532447	29.8316	840.663	1.01326	1.43436	3.56218	0.662942	0.118566	0.406674	2.18e-06	7	407	c
260	412	65	11.0509	1.35293	8.05368	13.3607	566.891	286.785	27.4368	0.664711	-1.22474	0.0538105	1.73272	0.798461	5.29873	0.612542	28.6037	769.445	1.1449	1.5009	1.73272	0.536342	0.278532	0.620264	0.0511337	4.69274	0.448849	5.25722	0.476749	28.3799	757.328	1.08534	1.57694	4.69274	0.705009	0.110426	0.410272	1.86e-06	3	394	c
261	104	33	5.34337	1.12379	3.28966	7.04342	683.259	280.195	15.2011	0.786778	-1.31034	0.0869524	2.31933	0.63971	4.21869	0.566873	31.5518	944.871	0.98525	1.34586	2.31933	0.588783	0.210017	0.520391	0.063824	4.7973	0.158485	3.85039	0.447945	31.1757	921.239	0.932749	1.35141	4.7973	0.708659	0.085576	0.337349	1.4e-06	7	90	l
262	283	54	9.07069	0.925036	7.61919	10.9602	502.979	286.516	22.1301	0.57644	-1.22578	0.0365591	2.27387	0.808381	6.93329	0.574561	28.7059	777.218	1.21482	1.62455	2.27387	0.582049	0.267909	0.628501	0.0270052	6.37917	0.488387	7.23437	0.442066	28.5042	764.79	1.18692	1.71558	6.37917	0.762721	0.116775	0.437778	2.12e-06	9	249	c
263	246	68	8.36367	2.41026	2.14303	12.5536	211.789	291.486	23.6147	0.770246	1.32665	0.103099	0.632558	0.717692	2.12033	0.736744	35.0488	1170.7	0.889664	1.09698	0.632558	0.364989	0.26155	0.530222	0.0765392	1.42781	0.34853	2.09583	0.600535	34.754	1152.95	0.842405	1.21576	1.42781	0.490771	0.0708059	0.292192	2.33e-06	9	1520	c
264	317	55	9.6786	0.952761	7.45889	11.3985	88.6075	292.085	21.3267	0.38312	-1.23802	0.166202	0.410806	0.698444	1.68114	0.806947	29.229	812.69	0.761883	0.894112	0.410806	0.308923	0.277504	0.500308	0.103557	0.97026	0.402154	1.81146	0.662082	29.171	808.648	0.774299	1.06172	0.97026	0.426363	0.0720321	0.27617	2.05e-06	9	1172	c
265	132	36	6.06657	0.972622	4.15675	8.01046	293.708	285.909	15.8084	0.720387	0.277735	0.0851572	0.887931	0.633788	2.21232	0.677586	34.6853	1145.41	0.899978	1.18161	0.887931	0.412164	0.174835	0.45009	0.0718258	2.2233	0.139428	2.29176	0.504455	34.5728	1140.72	0.841834	1.2771	2.2233	0.55156	0.0364664	0.215241	2.19e-06	8	120	c
266	373	68	10.6116	1.81426	7.29425	14.4609	314.895	296.468	27.6056	0.708532	-1.3534	0.0363255	1.14847	0.873058	5.52361	0.656897	30.575	879.808	1.20044	1.52878	1.14847	0.465295	0.347921	0.689031	0.0246602	3.31212	0.671942	6.04807	0.478794	30.4212	871.343	1.19002	1.68705	3.31212	0.635277	0.197062	0.555364	2.18e-06	7	1316	c
267	402	75	10.779	2.21771	5.34933	14.9903	333.513	299.096	28.6014	0.712882	-1.37466	0.0472839	1.18133	0.90983	7.55052	0.673134	32.2287	988.492	1.18886	1.5059	1.18133	0.473974	0.37631	0.708825	0.0346283	3.79042	0.733762	8.11847	0.518003	31.9281	969.341	1.19286	1.65022	3.79042	0.674165	0.224839	0.584514	2.16e-06	6	1316	c
268	158	39	6.8978	1.48082	4.25131	9.30243	427.275	293.938	19.9424	0.829765	0.951175	0.0413361	3.37321	0.690151	6.44333	0.514911	27.9589	736.466	1.16218	1.6089	3.37321	0.658151	0.193154	0.539502	0.0333252	9.55469	0.249907	7.369	0.368089	27.5234	713.277	1.11594	1.6481	9.55469	0.829587	0.0656936	0.325435	2.19e-06	9	158	c
269	244	55	8.32662	1.43707	4.64978	10.7822	700.031	299.645	21.9628	0.680897	-1.48063	0.0558878	2.28929	0.810029	7.02539	0.582689	28.8998	791.154	1.16277	1.54617	2.28929	0.586879	0.277549	0.626442	0.0459366	6.89163	0.489706	7.75261	0.440502	28.803	785.257	1.14183	1.63917	6.89163	0.782843	0.13134	0.453653	1.33e-06	6	598	l
270	383	74	10.9405	2.88397	6.2017	16.3683	714.062	307	31.8481	0.84788	-1.43572	0.0738325	0.86315	0.771029	2.88485	0.71096	33.9066	1089.25	1.00409	1.27147	0.86315	0.421524	0.271134	0.573479	0.0600415	1.91463	0.50297	2.92608	0.578912	33.9451	1092.87	0.974289	1.37877	1.91463	0.543409	0.107562	0.380878	1.22e-06	4	598	c
271	267	53	8.85921	1.74138	5.04423	12.0663	412.472	305.059	23.4116	0.71832	-1.41921	0.0358772	1.57862	0.81092	5.17448	0.608782	30.6023	881.682	1.16482	1.5454	1.57862	0.513779	0.267693	0.616231	0.030313	4.62996	0.513595	5.75936	0.44447	30.533	878.051	1.14523	1.66395	4.62996	0.705932	0.102278	0.405208	2.15e-06	7	260	c
272	468	84	12.045	3.20732	5.5965	18.3611	260.059	309.98	34.2509	0.800052	1.13643	0.105556	0.62907	0.754085	2.27904	0.770499	25.7186	620.069	0.907685	1.11463	0.62907	0.374595	0.302779	0.572828	0.0756492	1.37374	0.483631	2.33019	0.646903	25.5707	612.702	0.897747	1.25444	1.37374	0.493684	0.123513	0.390158	2.28e-06	8	1676	c
273	351	62	10.1351	1.19887	7.90798	12.1079	654.423	311.94	23.7207	0.494101	-1.30152	0.0512962	1.34618	0.774976	3.99121	0.65594	31.2197	917.879	1.09897	1.44703	1.34618	0.487574	0.259039	0.591513	0.0363909	2.81457	0.516742	3.91208	0.523142	31.0265	907.212	1.05353	1.53695	2.81457	0.616536	0.113544	0.410984	1.68e-06	7	343	c
274	169	43	7.00889	1.70495	3.75918	10.046	228.775	312.666	20.7533	0.834605	1.47738	0.0348194	1.97	0.765212	5.19527	0.561407	30.16	855.948	1.15763	1.55318	1.97	0.547599	0.259112	0.608438	0.0303391	4.27642	0.35302	4.30491	0.428503	29.0894	795.431	1.04504	1.56488	4.27642	0.670072	0.0933627	0.376947	2.32e-06	11	157	c
275	422	76	11.8865	3.5076	5.47009	18.2231	121.606	322.753	36.5442	0.892084	1.11556	0.057149	1.5103	0.815419	5.09115	0.637584	29.7136	832.183	1.12467	1.47222	1.5103	0.517322	0.281729	0.618813	0.0412783	4.73442	0.464481	5.4204	0.479658	29.4553	817.188	1.09615	1.62362	4.73442	0.719839	0.0958776	0.38838	2.19e-06	5	4030	c
276	531	83	12.5401	1.84026	8.65179	16.1536	486.922	319.476	30.4923	0.636893	1.07718	0.0882128	0.60303	0.839573	2.87945	0.756667	35.0737	1169.66	0.974691	1.17417	0.60303	0.36684	0.349775	0.626178	0.0582249	1.42198	0.629226	2.91758	0.607511	34.8593	1155.1	0.964623	1.32761	1.42198	0.49069	0.156751	0.449581	2.05e-06	4	415	c
277	268	65	9.16841	2.47484	5.60494	14.5459	136.18	318.548	27.4085	0.855678	1.51076	0.0317099	2.28571	0.788371	6.4003	0.574944	29.3285	810.278	1.20441	1.61718	2.28571	0.57706	0.264144	0.62346	0.0260754	4.79904	0.491106	5.71517	0.420471	28.3397	754.223	1.1338	1.70421	4.79904	0.697864	0.107927	0.420345	2.28e-06	6	4030	c
278	167	39	6.8896	0.864742	5.36045	8.62858	526.764	316.825	17.4409	0.676358	-1.3192	0.0616763	1.35846	0.702289	3.28151	0.650773	32.7387	1013.85	1.01992	1.35661	1.35846	0.491768	0.23062	0.545777	0.0518363	3.53147	0.360842	3.76259	0.502842	33.1399	1040.14	1.00551	1.44692	3.53147	0.664152	0.0841167	0.345418	1.95e-06	5	155	c
279	325	70	10.2577	3.1341	5.34125	15.7276	20.1386	325.425	31.529	0.897347	1.18161	0.174763	0.419492	0.650149	1.59953	0.806525	36.3347	1268.63	0.744764	0.885879	0.419492	0.313537	0.239438	0.462739	0.132511	0.818533	0.328244	1.60925	0.683398	36.2548	1264.53	0.717378	0.98578	0.818533	0.393684	0.0578774	0.238876	1.06e-06	2	307	c
280	240	57	8.54284	2.51641	4.82536	13.0889	339.818	323.154	27.02	0.892677	-1.51573	0.049032	1.09733	0.825679	4.14745	0.659253	32.9166	1024.25	1.09276	1.40287	1.09733	0.447918	0.304959	0.629577	0.0345179	2.68617	0.561226	4.06099	0.484449	32.5266	999.061	1.07023	1.53364	2.68617	0.593963	0.138459	0.451649	2.15e-06	5	1316	c
281	272	56	9.01674	1.95982	6.01934	12.3628	205.38	327.068	24.7986	0.800105	1.3737	0.126251	0.609312	0.643809	1.85532	0.758502	26.5283	663.584	0.822847	1.02684	0.609312	0.367521	0.218858	0.472254	0.0933081	1.23913	0.303826	1.88996	0.625652	26.587	667.992	0.786347	1.11708	1.23913	0.468411	0.0474774	0.229948	2.33e-06	9	1520	c
282	201	46	7.56749	0.951408	5.53268	9.4938	603.39	323.364	19.2399	0.631454	-1.18463	0.0332217	2.57735	0.791646	7.18502	0.522341	28.5663	770.824	1.20462	1.62914	2.57735	0.600869	0.254548	0.614997	0.0233489	7.15476	0.452784	7.53741	0.362789	28.4286	761.427	1.18096	1.73516	7.15476	0.787636	0.119744	0.445297	1.8e-06	3	181	c
283	371	63	10.418	0.923568	8.40222	12.0268	627.479	326.655	24.9544	0.55649	1.56642	0.0435277	1.86182	0.836618	6.69776	0.593975	28.6749	776.767	1.18241	1.5546	1.86182	0.551113	0.288557	0.638738	0.0363622	4.78233	0.540531	6.2042	0.453082	28.3028	754.806	1.12249	1.61506	4.78233	0.70467	0.12773	0.444719	1.79e-06	5	545	c
284	779	101	15.4652	2.86166	9.28403	20.809	100.536	336.358	36.1432	0.507347	0.876655	0.100899	0.654762	0.752838	2.32456	0.764456	33.6418	1075.43	0.9189	1.13472	0.654762	0.382266	0.290024	0.565235	0.0733624	1.32448	0.488827	2.29553	0.63781	33.5044	1067.43	0.891904	1.24804	1.32448	0.484084	0.1048	0.359062	1.96e-06	4	952	c
285	132	38	6.15558	1.73147	3.24528	9.50652	253.021	327.779	18.5155	0.854016	1.3941	0.144388	0.521834	0.613691	1.67541	0.770524	27.3122	706.997	0.763827	0.941184	0.521834	0.341443	0.196833	0.430979	0.1101	1.14	0.168611	1.6856	0.598	27.24	706.005	0.699414	1.01983	1.14	0.41155	0.0501315	0.226028	2.27e-06	7	1676	c
286	220	45	8.07662	1.40293	5.19187	10.0808	664.018	332.004	21.6887	0.76104	-0.967862	0.029728	1.96361	0.853259	7.69074	0.583518	30.4856	880.093	1.24017	1.64179	1.96361	0.546343	0.293536	0.656916	0.0223003	5.36022	0.606656	7.81364	0.413275	30.3925	873.761	1.20572	1.73634	5.36022	0.733232	0.165576	0.518726	1.71e-06	6	201	c
287	390	63	10.7425	0.941891	9.51763	12.8902	540.618	339.869	25.1322	0.55958	0.694676	0.0502107	1.8	0.74616	4.54554	0.588152	29.8428	838.1	1.10745	1.49293	1.8	0.541915	0.22045	0.556047	0.0426502	4.65046	0.329346	4.46711	0.440214	29.5684	822.546	1.04949	1.55828	4.65046	0.711386	0.0536897	0.287019	1.87e-06	2	367	c
288	102	35	5.39589	0.990291	3.40012	7.01555	340.298	343.073	13.5756	0.617803	1.50824	0.101267	0.699708	0.686646	2.11648	0.71312	35.9767	1236.57	0.86542	1.09297	0.699708	0.374352	0.221062	0.487719	0.0830046	1.51282	0.262382	2.02548	0.566667	35.9744	1239.88	0.79922	1.16174	1.51282	0.479894	0.0525077	0.246421	2.15e-06	3	82	c
289	226	52	8.5425	2.2885	4.8298	12.4754	623.792	348.426	25.9282	0.884508	-1.03946	0.0435167	1.77217	0.813549	5.75236	0.595375	30.2943	866.003	1.16075	1.53607	1.77217	0.538651	0.271485	0.618687	0.0348735	4.29143	0.498865	5.28171	0.414537	29.8343	838.272	1.10388	1.57055	4.29143	0.673522	0.128764	0.440888	1.83e-06	5	545	c
290	224	59	9.36795	3.53807	3.86574	15.1006	171.342	350.501	31.1719	0.948029	0.942555	0.0514789	1.24112	0.717393	3.19584	0.623096	33.368	1053.14	1.03231	1.37466	1.24112	0.465613	0.215033	0.530984	0.0382853	3.26901	0.30945	3.36696	0.452581	33	1031.29	0.982979	1.49724	3.26901	0.623947	0.062273	0.3029	2.2e-06	4	579	c
291	466	80	12.0183	2.87799	5.73723	17.2428	496.27	356.942	34.403	0.809687	-1.52687	0.0281042	1.47304	0.887552	7.54986	0.623968	31.5357	940.572	1.27271	1.65086	1.47304	0.507528	0.336393	0.69791	0.0180306	4.10914	0.673516	7.29302	0.449206	31.0228	907.823	1.24432	1.80682	4.10914	0.684739	0.16505	0.526785	1.93e-06	4	503	c
292	199	50	7.84839	2.44089	3.40658	11.5362	224.423	352.913	25.3473	0.901603	-1.21301	0.0385346	1.9548	0.77824	5.40748	0.582857	31.3644	929.001	1.14313	1.56315	1.9548	0.554198	0.248037	0.598033	0.0324417	5.78846	0.369378	5.58949	0.429174	30.9679	905.274	1.08978	1.67036	5.78846	0.752071	0.104326	0.409806	2.22e-06	6	180	c
293	232	55	8.47237	2.23143	4.79807	12.1806	649.914	360.834	25.3912	0.860833	-1.18118	0.0304166	1.84337	0.827473	6.34226	0.573065	30.8241	896.453	1.21114	1.61348	1.84337	0.536494	0.273025	0.632142	0.0242947	4.77957	0.561574	6.45083	0.404044	30.4785	875.777	1.174	1.70507	4.77957	0.705867	0.127766	0.455657	1.84e-06	5	525	c
294	448	103	12.9613	4.72556	4.78514	23.5024	132.179	371.518	42.0379	0.918446	1.41616	0.0623763	0.910161	0.858092	4.20687	0.689901	33.961	1093.67	1.07088	1.34992	0.910161	0.42774	0.330618	0.643548	0.0432143	2.55153	0.624661	4.39897	0.52793	33.6379	1072.33	1.0605	1.51535	2.55153	0.600335	0.151273	0.468648	1.93e-06	7	897	c
295	723	99	15.3859	4.43647	8.77136	22.8808	565.534	379.445	46.9962	0.89432	-1.3519	0.0705826	1.3014	0.820718	4.62946	0.680913	29.6891	829.785	1.11339	1.41682	1.3014	0.493037	0.324573	0.649957	0.0546775	3.23259	0.501944	4.24521	0.558858	29.356	809.989	1.06748	1.48367	3.23259	0.64264	0.142533	0.45126	1.81e-06	5	690	c
296	333	65	10.2462	2.86823	4.93999	15.3368	671.851	371.063	30.7963	0.873419	-0.97148	0.0407646	1.45522	0.7659	4.10811	0.61321	31.8726	956.659	1.12069	1.49592	1.45522	0.503412	0.241348	0.580291	0.0286976	3.62774	0.427376	4.16764	0.449685	31.6788	945.49	1.07742	1.6388	3.62774	0.642788	0.0764084	0.34939	1.8e-06	5	329	c
297	390	79	11.5056	4.29383	4.59997	18.3991	607.832	379.241	40.1356	0.937214	1.48682	0.0270537	1.85063	0.843872	6.92664	0.590921	30.0175	850.539	1.23068	1.64831	1.85063	0.543718	0.283845	0.648307	0.0190461	5.41141	0.549917	7.01157	0.422812	30.042	850.591	1.19839	1.78444	5.41141	0.715984	0.125679	0.461329	1.84e-06	5	377	c
298	468	89	12.091	3.62531	5.27781	17.7343	100.333	379.126	37.4502	0.8521	1.27371	0.0435406	1.23108	0.925436	9.25518	0.661982	31.1286	924.575	1.24913	1.55897	1.23108	0.479015	0.404683	0.739307	0.0256405	3.37845	0.800406	9.46329	0.492441	30.7569	900.044	1.26843	1.74658	3.37845	0.65014	0.242853	0.61882	1.66e-06	7	330	c
299	392	79	11.4777	4.18954	3.58976	17.9782	177.137	380.165	38.2091	0.91596	-1.56197	0.0524667	1.09986	0.798489	3.72903	0.672998	33.0091	1029.53	1.07607	1.38458	1.09986	0.458795	0.283996	0.606331	0.0369481	2.7403	0.524861	3.88368	0.519344	32.9075	1023.74	1.04929	1.51193	2.7403	0.606063	0.11143	0.404234	2.01e-06	3	579	c
300	320	54	9.70484	0.855168	8.23225	11.7407	290.695	374.658	22.7087	0.45133	-1.3672	0.060343	2.27858	0.8198	7.32236	0.58023	26.7494	678.098	1.15469	1.53471	2.27858	0.588503	0.270733	0.617701	0.0462364	5.86842	0.481769	6.66198	0.437081	26.0789	640.862	1.0973	1.62091	5.86842	0.743432	0.115865	0.425138	2.16e-06	6	308	l
301	338	60	9.94329	1.04955	8.01017	12.384	638.244	377.66	24.0571	0.57594	1.57052	0.0383544	1.93905	0.830919	6.73408	0.622411	28.4298	761.429	1.21896	1.61087	1.93905	0.552944	0.299052	0.65761	0.0327567	4.61922	0.56991	6.37006	0.487217	28.0142	737.954	1.16105	1.65359	4.61922	0.688876	0.161756	0.502489	1.88e-06	5	525	c
302	206	43	7.66669	0.420756	6.9096	8.56022	261.851	387.643	17.7619	0.392297	-0.356349	0.0333018	2.63539	0.815761	8.15209	0.527035	28.2011	752.933	1.23887	1.66772	2.63539	0.607593	0.266259	0.633126	0.0305594	6.72222	0.469805	7.33938	0.400527	27.4012	706.422	1.17555	1.68061	6.72222	0.765525	0.12569	0.449226	2.1e-06	6	193	l
303	463	77	12.3602	3.04307	6.86261	18.0286	131.959	402.218	35.5597	0.86419	-0.968377	0.0584156	0.98544	0.833385	3.95724	0.696	31.1648	915.288	1.09083	1.37009	0.98544	0.442615	0.328289	0.645098	0.0408511	2.31738	0.579417	3.75496	0.55158	30.927	901.292	1.05072	1.49306	2.31738	0.582453	0.136164	0.442716	1.71e-06	5	897	c
304	664	88	14.5791	3.0186	9.38182	19.608	467.26	403.104	39.1135	0.821984	0.920015	0.154915	0.45	0.694585	1.7367	0.79564	37.6428	1360.03	0.798141	0.949894	0.45	0.322592	0.267802	0.504489	0.111168	0.938671	0.3848	1.7629	0.667632	37.5281	1352.92	0.77482	1.06878	0.938671	0.421266	0.0755388	0.28369	1.91e-06	6	427	c
305	531	79	12.6422	1.38518	10.4677	16.5905	240.211	400.462	29.8781	0.57791	0.380368	0.0410206	1.10211	0.886271	5.84536	0.692575	31.083	910.348	1.21548	1.51985	1.10211	0.454176	0.379745	0.713826	0.0277478	2.88578	0.707082	5.92591	0.532204	30.7478	889.898	1.19991	1.6711	2.88578	0.611818	0.201573	0.558962	2.01e-06	4	493	c
306	360	63	10.4179	2.01973	6.61343	13.9167	293.373	400.141	27.3574	0.735865	-0.9724	0.0558814	1.4872	0.753022	4.0108	0.629671	30.6544	885.053	1.08247	1.44578	1.4872	0.508004	0.231096	0.5609	0.0460444	3.65	0.352055	3.8166	0.475406	30.3167	866.449	1.01083	1.54184	3.65	0.660854	0.0629531	0.308804	2.12e-06	8	361	c
307	584	81	13.3317	2.14881	9.60427	16.9227	505.609	409.254	34.9773	0.749571	1.19809	0.0464615	1.42213	0.863055	6.19234	0.654711	31.24	922.952	1.17997	1.52068	1.42213	0.503052	0.319465	0.662621	0.0361096	3.67704	0.62251	5.87038	0.515311	31.0311	909.999	1.12804	1.63292	3.67704	0.660552	0.14359	0.472469	1.85e-06	8	519	c
308	317	62	10.1202	2.55341	6.00784	15.4136	219.773	412.295	28.419	0.83766	0.962205	0.112835	0.634315	0.765496	2.35246	0.762912	26.1976	645.543	0.884185	1.09416	0.634315	0.378873	0.294633	0.561087	0.0778942	1.54307	0.453971	2.41299	0.619476	26.2022	645.819	0.870249	1.22229	1.54307	0.517053	0.112033	0.367467	1.92e-06	3	1033	c
309	318	66	10.1274	2.92679	4.89957	15.3684	311.558	411.899	30.6771	0.882028	-1.26531	0.0401205	2.24827	0.679828	4.51103	0.563814	30.641	883.712	1.11278	1.54695	2.24827	0.577382	0.180326	0.513862	0.0333096	4.87795	0.220596	4.12928	0.427816	30.2402	860.53	1.03587	1.61192	4.87795	0.714524	0.0530385	0.28996	2.12e-06	9	369	c
310	139	41	6.39038	1.92746	2.91073	9.41375	536.121	408.189	20.0249	0.873449	-1.4846	0.0617508	1.25	0.732333	3.33499	0.657353	36.2293	1248.6	1.00851	1.3413	1.25	0.485354	0.243159	0.556917	0.0443244	3.74074	0.304758	3.69024	0.500821	36.1296	1241.18	0.999086	1.45669	3.74074	0.665179	0.086441	0.35116	1.81e-06	6	85	c
311	79	28	4.62382	0.965163	3.21429	6.12164	69.2956	409.054	13.0785	0.797769	-1.54994	0.121324	0.837736	0.490905	1.82277	0.726038	36.1208	1252.1	0.770409	1.01857	0.837736	0.420581	0.133821	0.368662	0.139754	0.941176	0.221374	1.60438	0.647059	35.8824	1241.05	0.674718	0.949681	0.941176	0.401488	0.0492778	0.216443	1.2e-06	3	71	c
312	543	88	12.7252	2.22124	8.45642	17.6908	377.314	422.774	31.608	0.655978	1.12132	0.0422465	1.11249	0.875335	5.46191	0.675079	33.8499	1083.02	1.19591	1.51344	1.11249	0.454569	0.34925	0.68769	0.0285171	2.70772	0.693668	5.41959	0.508019	33.8058	1079.82	1.17383	1.65934	2.70772	0.599935	0.175439	0.522685	2.06e-06	7	538	c
313	558	94	13.6787	4.62371	6.59336	21.6014	444.509	428.259	45.3842	0.928863	1.53293	0.0391112	1.14588	0.861794	5.14555	0.672843	33.5022	1060	1.18247	1.50643	1.14588	0.469818	0.333778	0.673147	0.0276919	3.01217	0.651003	5.31547	0.546791	33.4828	1058.34	1.17034	1.63989	3.01217	0.610792	0.191518	0.541688	1.93e-06	6	473	c
314	260	51	8.88185	1.73771	5.84228	11.579	666.758	420.546	25.5636	0.813436	-0.578274	0.0235433	3.50844	0.814911	10.4777	0.516674	25.4114	614.451	1.3272	1.81428	3.50844	0.660584	0.274234	0.661962	0.0210431	8.21905	0.549868	10.1296	0.395346	24.7143	578.145	1.2655	1.82123	8.21905	0.802654	0.191756	0.566048	1.93e-06	7	260	c
315	309	62	9.59199	1.68808	6.65381	13.0266	270.309	422.349	23.7342	0.609574	-0.528964	0.0463145	1.46092	0.79902	4.63449	0.666766	31.6421	944.435	1.12394	1.46802	1.46092	0.501116	0.291046	0.627284	0.03265	3.22957	0.571324	4.76692	0.516122	31.3774	928.1	1.10762	1.60765	3.22957	0.624752	0.150281	0.479473	2.02e-06	8	296	c
316	101	32	5.25836	0.972791	3.8157	6.94601	726.895	421.153	14.1556	0.750111	1.39819	0.0913968	0.982709	0.554153	2.10207	0.671182	34.804	1155.95	0.855145	1.13679	0.982709	0.43616	0.151227	0.411953	0.0892485	2.44304	0.0514791	2.28781	0.537975	35.0253	1175.26	0.78273	1.202	2.44304	0.573889	0.0627495	0.273703	1.45e-06	7	113	c
317	444	82	11.7081	2.86366	5.52502	16.7671	477.961	434.479	31.1463	0.767184	1.16732	0.0872293	0.715337	0.809114	2.87373	0.75904	36.8061	1288.68	1.00256	1.22329	0.715337	0.387511	0.349763	0.636093	0.0622277	1.3617	0.635514	2.86798	0.644666	36.6968	1280.92	0.992279	1.34777	1.3617	0.48493	0.184367	0.489339	1.89e-06	6	284	c
318	295	53	9.36453	1.28167	6.94878	11.4019	706.484	428.191	23.8527	0.699461	1.00419	0.0463301	1.98801	0.796757	5.89072	0.617119	29.1282	798.676	1.18005	1.55549	1.98801	0.563842	0.285659	0.636015	0.0374045	4.64167	0.471904	5.39472	0.489833	28.5667	766.044	1.12387	1.62295	4.64167	0.698843	0.121558	0.435265	1.69e-06	10	282	c
319	762	98	15.4087	3.64453	9.22698	21.4579	154.637	446.814	44.0257	0.84164	-1.52985	0.0615638	1.04438	0.832833	4.12378	0.710596	30.7614	889.88	1.12313	1.4074	1.04438	0.455162	0.34471	0.665994	0.0399684	2.63845	0.604874	4.33875	0.563982	30.736	888.065	1.11595	1.57138	2.63845	0.606586	0.158008	0.486114	1.62e-06	4	748	c
320	663	98	14.1983	1.91491	10.8847	18.311	342.016	443.675	32.6957	0.505122	-1.24441	0.0649231	1.03013	0.853349	4.51218	0.726103	29.6344	826.755	1.10833	1.3648	1.03013	0.43842	0.373312	0.682275	0.0478171	2.25729	0.675205	4.47494	0.582338	29.482	818.123	1.08339	1.46599	2.25729	0.560744	0.18301	0.505669	2.04e-06	6	1670	c
321	618	94	13.9005	3.08916	7.9993	20.4593	185.448	451.023	36.5267	0.713269	1.28922	0.0619949	1.21732	0.844941	4.92534	0.690017	30.3662	869.823	1.12005	1.40887	1.21732	0.463489	0.343054	0.664825	0.0422774	2.55866	0.65881	4.74961	0.540002	30.1043	853.67	1.10032	1.54973	2.55866	0.598592	0.164039	0.491825	1.7e-06	4	960	c
322	138	37	6.21971	0.703994	4.50022	7.66587	681.83	438.409	14.9906	0.557756	-0.81073	0.0651189	0.855372	0.767416	2.83884	0.693802	26.4545	654.934	0.990176	1.25628	0.855372	0.412998	0.262256	0.56177	0.0461612	2.00935	0.475017	2.91373	0.54354	26.4206	653.941	0.958914	1.38828	2.00935	0.549705	0.0876805	0.34574	1.9e-06	9	789	c
323	224	59	8.79002	3.45697	2.85617	14.7063	311.275	450.33	29.9731	0.929441	1.18714	0.141864	0.632111	0.626785	1.84685	0.747661	36.574	1282.74	0.797124	1.00751	0.632111	0.372912	0.188174	0.434547	0.128217	1.1677	0.331862	1.87385	0.654658	36.5963	1287.13	0.752182	1.06759	1.1677	0.463735	0.0718669	0.276585	2.01e-06	9	216	c
324	365	63	10.3323	0.971193	8.61976	12.7547	742.378	447.821	24.4626	0.541844	-1.37944	0.0929529	1.49446	0.775785	4.33264	0.659787	29.5018	822.501	1.02966	1.32635	1.49446	0.517914	0.2822	0.594343	0.0731095	3.86319	0.385258	4.14212	0.537892	29.1661	803.829	0.968195	1.41184	3.86319	0.672379	0.0985157	0.368913	1.23e-06	4	343	c
325	687	100	15.5466	4.96052	7.94467	24.8338	118.613	460.293	47.4625	0.909182	-0.988962	0.0602516	0.899029	0.836363	3.74703	0.719016	32.6722	1007.29	1.09369	1.36427	0.899029	0.425215	0.338495	0.653017	0.041976	2.05132	0.627017	3.74989	0.574345	32.5613	1000.96	1.06499	1.48519	2.05132	0.552912	0.163025	0.481381	1.45e-06	3	677	c
326	127	37	6.21968	1.64465	3.50519	8.81736	277.944	444.318	18.8447	0.87596	0.605009	0.0635201	0.95	0.75739	2.95787	0.675	35.1182	1171.48	0.991999	1.27518	0.95	0.429787	0.256844	0.559685	0.057716	1.92222	0.439313	2.71417	0.558889	34.7667	1150.05	0.927183	1.30562	1.92222	0.541029	0.11372	0.381656	1.97e-06	7	117	c
327	305	65	9.83844	1.90553	5.70062	12.6353	403.364	450.44	25.4321	0.728492	0.945384	0.0492896	1.16243	0.852354	4.93655	0.653865	34.039	1097.1	1.13735	1.45957	1.16243	0.467392	0.322208	0.655082	0.035312	3.436	0.564336	4.9434	0.48263	33.628	1069.31	1.11696	1.57967	3.436	0.646136	0.134513	0.451356	1.95e-06	8	322	c
328	211	46	7.77079	0.970946	5.41518	9.70983	706.305	452.789	18.542	0.550213	0.815512	0.0432528	1.52493	0.823934	5.33057	0.645357	31.7585	952.458	1.15361	1.51637	1.52493	0.50765	0.289461	0.633583	0.0367122	3.53801	0.563452	5.05226	0.508022	31.6082	942.859	1.10921	1.57115	3.53801	0.664763	0.150729	0.475342	1.7e-06	9	199	c
329	683	87	14.2639	2.17515	8.19202	17.941	62.8501	466.205	34.6985	0.642708	-0.795497	0.123466	0.531469	0.765712	2.13422	0.787714	29.6208	829.173	0.895098	1.07276	0.531469	0.346218	0.320251	0.579413	0.0945506	0.98505	0.564841	2.13183	0.668937	29.51	823.394	0.87691	1.18053	0.98505	0.435206	0.137929	0.400563	1.06e-06	1	1016	c
330	348	72	10.1691	2.14424	5.64014	14.5385	198.838	469.701	26.2323	0.659923	-0.482578	0.0478392	0.986561	0.853018	4.35607	0.683999	32.0427	969.064	1.11331	1.40606	0.986561	0.439971	0.336375	0.658543	0.0310083	2.91864	0.5806	4.47954	0.512307	31.8339	956.236	1.0892	1.58795	2.91864	0.61793	0.150982	0.477944	1.71e-06	6	960	c
331	574	108	13.4294	3.67253	5.43789	21.6157	300.979	472.518	37.4342	0.736236	0.725084	0.0499826	1.25699	0.873747	5.97809	0.65573	30.7677	895.434	1.15722	1.48	1.25699	0.483707	0.337187	0.671801	0.0347934	3.51992	0.642042	5.91667	0.499891	30.3333	868.753	1.13391	1.63599	3.51992	0.65844	0.162038	0.500585	1.92e-06	6	1064	c
332	168	59	7.42742	3.17465	1.55978	12.9114	585.265	465.397	27.2227	0.932437	-0.693818	0.0464093	1.74912	0.577744	3.07116	0.563812	34.4735	1128.04	0.98468	1.38453	1.74912	0.522543	0.12232	0.406269	0.0402148	3.68376	0.129466	3.1158	0.431724	34.5214	1133.59	0.923579	1.45057	3.68376	0.646037	0.0460441	0.25706	1.94e-06	4	184	c
333	556	94	13.7437	3.82582	7.34312	21.2954	344.678	475.412	39.7051	0.877476	1.27782	0.0608498	0.854581	0.845029	3.75723	0.736619	32.9447	1024.95	1.08917	1.34152	0.854581	0.414298	0.356496	0.664237	0.0425408	2.07911	0.619571	3.73259	0.598648	32.8418	1018.86	1.06111	1.47609	2.07911	0.556034	0.17643	0.498451	1.92e-06	5	1670	c
334	132	37	6.09506	1.274	3.89527	8.23704	633.019	475.454	17.0992	0.786557	-1.49614	0.0463766	1.54447	0.718462	3.74291	0.586372	32.6074	1005.02	1.0543	1.41596	1.54447	0.501127	0.213907	0.536311	0.0448934	3.78788	0.334922	3.84769	0.438297	32.4747	997.49	1.01227	1.46647	3.78788	0.658689	0.0783433	0.335708	2.07e-06	9	117	c
335	431	68	11.4213	2.01343	7.9197	15.3417	599.111	486.58	30.837	0.774839	-1.24792	0.0515568	1.31215	0.862402	5.76807	0.67426	29.5128	821.373	1.1647	1.4758	1.31215	0.487298	0.349277	0.681532	0.0407356	3.1126	0.674169	5.7764	0.540349	29.3217	810.025	1.14314	1.57966	3.1126	0.629909	0.188715	0.5296	2.06e-06	6	392	c
336	173	43	7.32022	1.88617	4.2147	10.4813	211.991	485.89	21.6476	0.861967	-0.863424	0.0493681	1.11256	0.804206	3.84116	0.662508	32.9364	1025.25	1.07731	1.39857	1.11256	0.454973	0.278897	0.603698	0.0368308	2.65414	0.530925	3.82912	0.486269	32.6541	1007.62	1.04781	1.53238	2.65414	0.579056	0.130049	0.438132	1.73e-06	6	163	c
337	518	79	12.712	2.1192	9.20382	18.2819	310.631	500.526	32.9494	0.751006	1.31873	0.0403282	1.16658	0.883504	6.00695	0.687065	30.2137	860.013	1.21104	1.52251	1.16658	0.468637	0.373055	0.708893	0.0285365	2.84842	0.708924	5.8929	0.547092	29.871	839.266	1.19103	1.66382	2.84842	0.619292	0.21119	0.569983	1.86e-06	5	1064	c
338	101	35	5.34868	1.71873	1.90724	7.79435	676.943	489.808	17.0756	0.877792	1.48596	0.185731	0.488235	0.492117	1.48066	0.773529	37.0824	1326.51	0.6807	0.843032	0.488235	0.326356	0.147948	0.354981	0.216975	0.716418	-0.0106851	1.35442	0.713433	37.0149	1332.74	0.517817	0.733856	0.716418	0.38122	0.0035021	0.0507073	1.96e-06	11	66	c
339	180	42	7.15838	0.864156	5.44114	8.74704	631.958	489.694	18.1723	0.651962	0.289129	0.0474587	2.35659	0.769696	6.11626	0.561346	29.5907	827.016	1.1494	1.54741	2.35659	0.592279	0.251319	0.599198	0.0403188	6.40288	0.329041	5.77144	0.428234	28.8777	784.838	1.09002	1.605	6.40288	0.762029	0.0816125	0.357276	2.11e-06	8	153	c
340	256	59	8.77128	2.33111	4.4249	12.3811	172.521	501.11	26.5681	0.839316	-1.5002	0.0412842	2.1158	0.808422	6.52203	0.561151	29.4037	816.289	1.1846	1.57427	2.1158	0.570461	0.277971	0.631227	0.0398179	5.84112	0.488889	6.71415	0.419178	29.1121	800.054	1.12933	1.63741	5.84112	0.744733	0.12462	0.442225	1.64e-06	5	233	c
341	733	99	15.118	3.17567	8.90288	21.2417	541.713	512.69	40.8477	0.791829	-1.46747	0.0353856	1.47793	0.825295	5.22979	0.632202	32.3122	983.524	1.19821	1.57504	1.47793	0.507823	0.288561	0.641916	0.0243045	3.71586	0.556265	5.18702	0.477896	32.0926	969.813	1.16074	1.72375	3.71586	0.667564	0.113357	0.432542	2.15e-06	5	659	c
342	647	91	14.5397	3.70852	8.87633	21.2822	470.748	515.554	42.99	0.869411	-1.15294	0.0439382	1.72652	0.854207	6.92114	0.627581	30.1433	859.719	1.19923	1.57206	1.72652	0.536208	0.298393	0.651021	0.035375	4.41756	0.58564	6.33058	0.485119	29.6828	830.675	1.15613	1.69663	4.41756	0.705783	0.119903	0.441124	2.09e-06	7	562	c
343	453	71	11.7199	1.71711	8.23119	15.0961	234.326	511.187	29.3772	0.66472	0.764055	0.0383599	0.988744	0.888853	5.44791	0.664159	30.9532	901.779	1.20464	1.50513	0.988744	0.432178	0.371669	0.704957	0.0253228	2.68653	0.69528	5.40819	0.493905	30.557	878.255	1.17488	1.67206	2.68653	0.597552	0.176213	0.525455	1.76e-06	6	428	c
344	550	84	13.3172	3.63961	7.09288	19.0569	633.024	519.664	40.307	0.881784	-1.0939	0.0553635	1.47955	0.827053	5.27747	0.655369	28.8048	781.003	1.13941	1.46922	1.47955	0.510161	0.309852	0.645363	0.0437723	3.34183	0.564787	4.8393	0.521446	28.4671	761.618	1.08822	1.56464	3.34183	0.645396	0.132877	0.446817	2.16e-06	9	551	c
345	294	62	9.87284	2.8796	5.49716	14.8615	678.64	514.631	30.6537	0.894333	0.808094	0.0195596	2.96526	0.80089	8.44627	0.505662	27.3183	703.733	1.30075	1.81203	2.96526	0.61976	0.23608	0.61994	0.0152459	7.80913	0.464669	8.29374	0.325382	27.0871	689.383	1.24112	1.89252	7.80913	0.788363	0.122587	0.467947	1.93e-06	9	593	c
346	364	62	10.5383	2.07083	7.6619	14.8474	199.104	513.4	29.0559	0.801253	-0.329836	0.0387552	2.22363	0.757661	5.58784	0.584658	28.1568	742.918	1.19771	1.62085	2.22363	0.578209	0.241449	0.599358	0.0314378	4.77377	0.428992	5.18012	0.443492	27.882	727.855	1.12551	1.66392	4.77377	0.711107	0.0949863	0.391017	1.69e-06	6	360	c
347	299	69	9.04721	2.64184	1.26054	12.7095	142.053	517.272	25.5054	0.713119	-1.54009	0.0402525	2.30734	0.713009	5.01988	0.552734	30.2368	860.515	1.13792	1.55982	2.30734	0.5872	0.207912	0.551063	0.0309375	5.9375	0.294845	5.21007	0.424414	30.0375	849.356	1.08145	1.65449	5.9375	0.758255	0.0702432	0.336862	1.58e-06	5	284	c
348	153	43	6.64333	1.8553	3.72681	9.36872	610.144	513.948	21.0042	0.875321	-1.53169	0.0385738	2.62523	0.701688	5.40015	0.534957	29.0891	795.685	1.14787	1.57548	2.62523	0.607544	0.218042	0.565621	0.0371317	4.4955	0.44799	5.07193	0.430218	28.5856	768.07	1.08508	1.58797	4.4955	0.699967	0.101591	0.395346	2.17e-06	8	150	c
349	97	29	5.13448	0.44538	4.24152	5.89484	694.91	509.893	12.4507	0.582206	-0.849785	0.119425	0.776119	0.557576	1.87712	0.719403	34.8955	1164.45	0.811577	1.06043	0.776119	0.402823	0.154962	0.403936	0.127143	1.2	0.121339	1.68286	0.64	34.8	1164.18	0.70232	1.02446	1.2	0.463864	0.0174261	0.133596	1.77e-06	8	88	c
350	310	56	9.4988	0.767359	8.23245	10.9718	117.968	515.796	22.2108	0.508793	-0.846339	0.0376755	1.44084	0.837172	5.42444	0.630165	31.1446	913.285	1.19419	1.54927	1.44084	0.494777	0.315459	0.663509	0.0273895	3.18359	0.603671	5.01635	0.473259	30.6289	882.198	1.14474	1.6569	3.18359	0.631448	0.162325	0.50375	1.51e-06	5	287	c
351	481	81	12.5054	3.54049	6.57296	19.3453	515.117	527.953	37.7424	0.871951	-1.3642	0.0437608	2.28499	0.81088	7.04112	0.573327	28.4686	766.068	1.18883	1.60001	2.28499	0.584893	0.267962	0.624879	0.0330912	5.81127	0.488235	6.67768	0.441297	28.0074	738.457	1.14553	1.70292	5.81127	0.742455	0.116704	0.436198	2.23e-06	9	457	c
352	456	70	11.6136	1.2711	8.58457	14.4245	269.902	524.795	27.7216	0.576347	1.54033	0.0515974	1.46181	0.796702	4.59523	0.642939	29.6216	823.752	1.14649	1.48382	1.46181	0.510347	0.290421	0.629264	0.0407242	3.85316	0.443125	4.45963	0.495498	29.3367	807.652	1.09371	1.60327	3.85316	0.677546	0.102503	0.398804	1.81e-06	6	464	c
353	446	80	12.0747	3.72891	5.84665	18.3816	653.08	528.806	38.1656	0.906764	-1.34756	0.0569507	1.61613	0.757778	4.33605	0.6261	29.7156	831.159	1.08988	1.44441	1.61613	0.526659	0.235014	0.56508	0.0485665	4.02105	0.357847	4.13091	0.488137	29.4947	818.665	1.03139	1.52588	4.02105	0.676271	0.0635059	0.308602	2.09e-06	11	408	c
354	291	58	9.18247	1.11725	6.44496	11.172	33.2441	521.96	20.8611	0.327364	-0.409178	0.0467151	1.02256	0.87302	5.02643	0.679191	32.2519	983.792	1.1278	1.42176	1.02256	0.443922	0.346655	0.670148	0.030768	3.228	0.616991	5.214	0.506868	32.004	967.191	1.12418	1.60883	3.228	0.63382	0.144553	0.47088	9.66e-07	4	540	c
355	319	74	10.0473	2.93677	4.62889	16.4019	492.908	534.08	30.9041	0.856485	-1.45613	0.0280624	2.00348	0.825087	6.72709	0.563206	30.3568	869.028	1.23427	1.65286	2.00348	0.556693	0.272205	0.637145	0.0192947	5.62891	0.521267	6.87896	0.409917	29.8477	838.204	1.20648	1.8102	5.62891	0.743912	0.106419	0.42907	2.24e-06	9	567	c
356	362	62	10.5931	2.0607	7.40576	14.0416	82.6921	530.743	29.2304	0.807281	0.945085	0.0687909	1.64798	0.819726	5.57076	0.635307	28.4402	764.018	1.1019	1.43409	1.64798	0.533894	0.297221	0.627582	0.0516582	4.2918	0.483573	5.15528	0.500491	27.9574	736.04	1.05551	1.52957	4.2918	0.691206	0.12301	0.426222	1.38e-06	7	351	c
357	228	51	8.17356	1.74597	4.7576	11.3331	47.9544	535.402	22.7767	0.793796	1.46001	0.0818326	1.13642	0.766317	3.43154	0.658343	31.9233	962.992	1.02987	1.3239	1.13642	0.46471	0.258646	0.570229	0.072637	3.18378	0.347282	3.43887	0.530828	31.5514	942.523	0.958026	1.36733	3.18378	0.643462	0.0677097	0.302287	1.14e-06	6	540	c
358	260	71	9.66381	3.282	3.56942	15.8823	554.314	537.841	30.7267	0.908407	-1.10248	0.0297829	2.17904	0.81717	6.9592	0.530552	30.607	884.653	1.23021	1.64413	2.17904	0.564192	0.268669	0.632194	0.0207256	5.72857	0.542043	7.25448	0.373222	30.3667	869.662	1.20552	1.77651	5.72857	0.734612	0.121582	0.453258	2.28e-06	7	219	c
359	490	92	12.0087	3.39702	3.73592	18.2733	233.856	542.807	34.9103	0.805223	1.15469	0.0557406	1.35782	0.801684	4.42337	0.653881	30.5064	876.309	1.11297	1.44246	1.35782	0.498163	0.283077	0.61524	0.0503985	2.84987	0.522183	3.98218	0.528324	30.0051	848.159	1.03821	1.4956	2.84987	0.616087	0.100073	0.381795	1.74e-06	7	1005	c
360	302	63	9.78735	2.34913	5.76584	14.6273	584.598	542.06	27.6225	0.804842	1.33417	0.0462411	1.91538	0.786907	5.49424	0.597821	29.2457	805.599	1.14697	1.52459	1.91538	0.55112	0.264598	0.60976	0.0396231	3.92213	0.490473	4.84879	0.481214	28.8238	780.951	1.0843	1.56853	3.92213	0.67642	0.111842	0.411795	2.26e-06	7	260	c
361	669	100	15.038	4.77468	7.36699	22.748	705.659	551.465	48.2696	0.913651	-1.56151	0.0461187	1.58117	0.858762	6.59753	0.642272	27.4567	710.178	1.20089	1.53981	1.58117	0.52445	0.336649	0.681045	0.0345991	3.81834	0.629938	6.15906	0.506104	27.1332	691	1.16821	1.64771	3.81834	0.678186	0.166274	0.508234	1.55e-06	7	630	c
362	424	72	11.8187	3.50205	5.8332	17.9652	128.898	542.248	35.4532	0.874226	-0.668507	0.0514934	1.50543	0.760279	4.13997	0.661189	29.5259	818.031	1.11854	1.47031	1.50543	0.51414	0.269758	0.606422	0.0457504	3.16239	0.439736	3.82223	0.544181	29.2422	803.28	1.0437	1.52652	3.16239	0.642368	0.122994	0.42581	1.57e-06	5	438	c
363	265	63	9.08955	2.81323	3.86549	14.1838	264.423	543.825	28.1868	0.872738	0.643867	0.046011	1.27801	0.811389	4.38796	0.635661	33.0455	1032.3	1.10754	1.43514	1.27801	0.480791	0.280091	0.611057	0.0324173	3.17788	0.544518	4.48848	0.468754	32.6779	1008.8	1.08642	1.56804	3.17788	0.626023	0.126723	0.437214	1.8e-06	7	242	c
364	273	53	9.06015	1.42419	6.43241	12.1693	480.438	550.667	23.1421	0.679269	-1.17048	0.0466762	1.92246	0.837974	6.93256	0.59932	27.9567	737.482	1.20461	1.57186	1.92246	0.557102	0.309587	0.661602	0.031442	5.81092	0.582926	7.96629	0.437539	28.2059	751.55	1.1967	1.69897	5.81092	0.752136	0.153088	0.495443	2.3e-06	9	567	c
365	304	60	9.72143	2.83509	5.00228	14.3209	610.65	553.791	30.5516	0.88401	-1.15701	0.0502585	2.34445	0.773663	6.17912	0.576109	27.9639	737.488	1.1476	1.53581	2.34445	0.594086	0.24318	0.588511	0.0539838	6.06073	0.34521	5.62799	0.465818	27.5344	712.5	1.07599	1.52841	6.06073	0.743073	0.0816842	0.349353	2.22e-06	8	289	c
366	545	91	13.8001	4.40436	6.52011	22.6455	226.092	561.827	41.7543	0.890312	0.947023	0.0455158	1.31256	0.820997	4.66631	0.670385	30.6142	880.898	1.16012	1.4949	1.31256	0.481762	0.316701	0.655914	0.0336187	2.77468	0.584486	4.33885	0.536801	30.2554	860.486	1.10222	1.58444	2.77468	0.604859	0.154444	0.482635	1.72e-06	5	1005	c
367	547	102	13.1896	4.02109	6.01333	21.3671	530.716	560.462	40.1246	0.854723	-0.814233	0.0406401	1.18358	0.844033	4.79435	0.655478	33.3886	1053.82	1.14219	1.47563	1.18358	0.471558	0.30435	0.641271	0.0293676	3.02592	0.598214	4.76559	0.500486	33.2981	1048.21	1.10845	1.6197	3.02592	0.6235	0.12709	0.444222	2.37e-06	10	498	c
368	343	85	11.7677	5.48942	0.874475	20.0312	668.764	565.818	46.1404	0.957951	1.27799	0.0547823	2.0768	0.682662	4.27222	0.565629	30.7876	894.034	1.07189	1.47381	2.0768	0.566427	0.179225	0.501841	0.0454519	4.91603	0.226774	4.17891	0.438989	30.4962	877.134	1.01171	1.52848	4.91603	0.719048	0.0268598	0.20189	1.91e-06	9	318	c
369	366	67	10.611	2.4147	6.41551	15.0649	460.964	565.483	30.4212	0.816294	1.44422	0.0228432	2.18694	0.875899	9.81115	0.544038	28.9318	796.677	1.2981	1.73692	2.18694	0.567683	0.302987	0.679836	0.0172112	6.57742	0.635121	10.0132	0.359325	28.4161	766.51	1.26775	1.8708	6.57742	0.757607	0.155847	0.520657	2.28e-06	11	337	c
370	412	78	11.0998	3.10657	4.58561	16.8333	509.243	567.899	33.3271	0.846226	-1.46474	0.0422142	1.95506	0.823606	6.54172	0.591258	29.4197	817.181	1.18906	1.58827	1.95506	0.556126	0.260247	0.614998	0.0433743	5.43503	0.508145	6.52503	0.461862	29.2938	810.012	1.12738	1.60192	5.43503	0.742006	0.1037	0.400891	2.39e-06	13	375	c
371	461	78	12.1983	3.94883	4.76278	18.1748	57.0945	568.498	39.2714	0.907664	1.15762	0.0730608	1.51728	0.737803	3.8934	0.653405	28.7745	778.569	1.05239	1.39365	1.51728	0.515274	0.235433	0.557288	0.0545225	3.32828	0.429213	3.91552	0.502961	28.4545	761.317	1.01401	1.49073	3.32828	0.64733	0.0880992	0.35828	1.26e-06	6	791	c
372	358	62	10.2782	1.62179	7.75444	13.8821	35.0986	570.579	26.6583	0.720131	1.33542	0.0400769	1.17057	0.855543	5.05161	0.649135	29.3336	807.739	1.17859	1.50042	1.17057	0.458982	0.33033	0.669115	0.0328715	2.78025	0.657993	5.06461	0.484098	29.1242	795.793	1.15431	1.61656	2.78025	0.597817	0.166502	0.504408	1.08e-06	5	384	c
373	313	60	9.56676	1.56395	5.82504	12.8659	485.655	570.92	23.85	0.628018	-0.911404	0.030495	2.02265	0.829223	6.92191	0.570532	30.5557	882.444	1.21671	1.63366	2.02265	0.557172	0.275959	0.638163	0.0247263	4.95	0.607751	7.30976	0.420776	30.35	869.953	1.20101	1.74509	4.95	0.716325	0.141098	0.482423	2.36e-06	10	301	c
374	492	79	12.7005	3.5591	5.32177	18.4282	174.844	577.853	37.3048	0.879678	0.740977	0.0818763	0.750547	0.796551	2.84456	0.740842	32.0952	973.327	1.0034	1.24463	0.750547	0.401402	0.312753	0.607954	0.0583769	1.88498	0.474817	2.79459	0.598752	31.993	968.01	0.965281	1.38327	1.88498	0.547406	0.107705	0.381698	1.62e-06	4	534	c
375	201	51	7.75083	1.88725	4.49948	11.2176	426.038	579.541	21.9909	0.831003	-1.3505	0.085032	0.906294	0.716482	2.5983	0.711131	36.8951	1299.23	0.926412	1.19522	0.906294	0.432919	0.228958	0.5156	0.0664124	2.1465	0.392022	2.76527	0.569897	36.949	1304.23	0.903041	1.31462	2.1465	0.558405	0.0912857	0.343744	2.15e-06	8	190	c
376	244	51	8.38089	0.976748	6.46125	10.5469	335.083	578.188	20.3132	0.557251	0.219771	0.0445928	2.00453	0.795807	5.90843	0.599681	28.761	779.21	1.16429	1.55161	2.00453	0.561952	0.253963	0.602696	0.0337321	4.89583	0.487273	5.77431	0.444312	28.3333	754.588	1.12329	1.62037	4.89583	0.722679	0.132408	0.453075	1.9e-06	6	934	l
377	458	78	11.497	2.09541	5.34152	14.2124	589.407	583.148	29.6663	0.680063	-0.583917	0.0364272	1.29582	0.876956	6.26566	0.624004	28.8869	785.593	1.2133	1.55286	1.29582	0.479032	0.333148	0.680035	0.0282727	3.39796	0.646778	5.80995	0.481584	28.6429	770.342	1.17468	1.6585	3.39796	0.64919	0.151666	0.48814	2.23e-06	8	591	c
378	118	38	5.92036	1.66267	3.50948	8.6268	690.634	578.325	18.2693	0.872977	-1.55347	0.0504222	1.29383	0.701516	3.16733	0.622716	33.521	1064.52	1.0073	1.33474	1.29383	0.471642	0.223887	0.534541	0.0445511	3.4186	0.273657	3.3533	0.477565	33.6512	1075.25	0.95174	1.40747	3.4186	0.62756	0.103741	0.377794	1.66e-06	7	201	c
379	330	58	9.77968	0.601373	8.203	10.8029	311.738	582.151	22.9804	0.447077	-1.55505	0.0328467	2.1418	0.861049	8.70704	0.570432	26.6057	669.917	1.28321	1.66697	2.1418	0.574077	0.332965	0.697274	0.0287901	5.66312	0.617227	8.3975	0.418315	26.3014	652.061	1.23882	1.75071	5.66312	0.74713	0.171007	0.528382	1.88e-06	6	329	l
380	159	43	6.69066	1.07222	4.11937	8.67055	370.579	581.918	16.2775	0.566583	-0.31927	0.0630918	1.03405	0.683462	2.63338	0.644265	34.9122	1157.35	0.973323	1.27853	1.03405	0.429714	0.202169	0.499898	0.0529092	2.17213	0.32417	2.60701	0.491948	34.6639	1142.8	0.921671	1.3629	2.17213	0.526765	0.0658428	0.297686	1.96e-06	4	379	c
381	232	52	8.16097	1.14964	5.76795	10.1242	386.833	583.091	20.6509	0.670769	-0.204137	0.0769444	1.20714	0.798409	3.99405	0.676261	31.931	963.478	1.06497	1.36432	1.20714	0.481638	0.303898	0.621853	0.058481	2.94709	0.505139	3.9777	0.523424	31.7196	951.069	1.02585	1.48156	2.94709	0.627251	0.12255	0.419359	2e-06	5	379	c
382	398	70	11.2189	2.92359	6.82871	16.6211	629.308	595.886	33.3555	0.869105	1.41704	0.066376	1.52517	0.808873	4.98994	0.637075	29.415	816.25	1.09862	1.44428	1.52517	0.518104	0.275045	0.607524	0.0507549	3.68129	0.537517	4.97991	0.514489	29.3129	810.224	1.06423	1.5239	3.68129	0.661077	0.122795	0.425149	2.03e-06	7	345	c
383	318	59	9.75367	1.80157	6.52192	12.4782	53.906	592.494	26.6533	0.782583	1.0163	0.0324749	1.74743	0.843724	6.59085	0.602595	29.292	809.249	1.20933	1.59368	1.74743	0.530022	0.290591	0.646778	0.0228716	3.97328	0.625468	6.30433	0.432075	28.8359	782.216	1.17775	1.7149	3.97328	0.665455	0.148543	0.490469	1.22e-06	5	791	c
384	53	22	3.70259	0.696465	2.52017	4.80401	538.632	585.985	10.4283	0.761061	-0.979479	0.0479635	2.23977	0.487569	3.18543	0.523254	33.5731	1068.42	0.985973	1.4123	2.23977	0.565248	0.133066	0.427028	0.0600586	5.8125	-0.170271	3.4834	0.31168	33.5625	1073.63	0.859149	1.30129	5.8125	0.692197	0.134581	0.413749	2.35e-06	7	51	c
385	243	56	8.66562	2.71568	4.70335	13.0129	110.474	596.028	27.9076	0.905067	1.36241	0.0473332	1.23314	0.809109	4.22997	0.642467	30.6389	883.825	1.10688	1.44295	1.23314	0.476979	0.286013	0.618213	0.0350894	3.38424	0.466563	4.1721	0.501596	30.3596	867.561	1.06359	1.55619	3.38424	0.650399	0.126615	0.435549	1.47e-06	3	745	c
386	409	79	11.0027	3.54274	2.12225	16.7498	545.588	601.947	33.2135	0.827527	-0.463135	0.0337701	1.87125	0.783339	5.31838	0.597267	32.7292	1010.98	1.17645	1.59123	1.87125	0.550829	0.246692	0.600793	0.0274181	4.5194	0.475864	5.31129	0.463813	32.5433	999.126	1.13628	1.70238	4.5194	0.708437	0.104837	0.414333	2.27e-06	9	389	c
387	469	68	11.8311	1.39218	9.61374	14.8961	133.575	599.016	29.6368	0.677514	-0.258735	0.0424174	1.13789	0.869181	5.34911	0.674247	29.1972	800.615	1.19079	1.49221	1.13789	0.460463	0.359151	0.69256	0.0300654	2.94231	0.665721	5.40097	0.499523	28.9567	787.077	1.16436	1.62232	2.94231	0.61175	0.185558	0.531397	1.51e-06	6	745	c
388	201	47	7.624	1.19963	5.19711	9.86016	470.357	595.968	19.3854	0.696973	-0.0837894	0.0888069	0.668056	0.777851	2.50362	0.732639	36.3153	1257.84	0.924653	1.14024	0.668056	0.376455	0.286093	0.562668	0.0661564	1.42767	0.505809	2.44445	0.595597	36.1447	1246.95	0.894168	1.25094	1.42767	0.485573	0.109969	0.368062	2.29e-06	11	635	c
389	261	65	9.58078	3.65938	4.10841	15.9186	449.558	605.798	32.8166	0.937375	1.23945	0.065433	0.975189	0.717606	2.72665	0.667289	36.0777	1238.28	0.972866	1.26831	0.975189	0.423211	0.22191	0.520922	0.0449623	2.40191	0.346346	2.8373	0.512693	35.9904	1232.97	0.947332	1.41209	2.40191	0.572177	0.0520013	0.269479	2.18e-06	9	256	c
390	336	61	9.93642	1.5918	7.02659	12.5892	665.189	602.888	25.9244	0.707927	1.34959	0.0457286	1.34276	0.869273	6.13577	0.627063	30.2094	863.507	1.15242	1.47723	1.34276	0.490252	0.33045	0.665407	0.0420925	3.95455	0.615948	6.14845	0.46253	29.9755	848.861	1.12728	1.55245	3.95455	0.678104	0.156445	0.481279	1.79e-06	7	304	c
391	400	77	11.0752	3.16672	4.43559	16.8992	690.556	607.269	32.3584	0.838035	-1.18387	0.0451969	1.32766	0.827176	4.84106	0.659563	32.4203	992.231	1.1442	1.48995	1.32766	0.488055	0.288157	0.62805	0.0324518	3.42486	0.562233	4.91173	0.518796	32.4306	993.34	1.10783	1.62513	3.42486	0.653531	0.127808	0.446085	1.56e-06	6	404	c
392	230	54	8.23335	1.08963	6.45975	10.6017	488.899	598.738	20.3673	0.648262	0.0546445	0.0522784	0.86303	0.850956	3.89522	0.676121	33.6558	1071.79	1.08165	1.34752	0.86303	0.402687	0.341177	0.652323	0.0361486	2.59887	0.533693	3.78665	0.484613	33.0169	1030.97	1.04168	1.51196	2.59887	0.583112	0.12413	0.425852	2.31e-06	11	635	c
393	375	88	10.963	2.91086	5.6194	17.5787	164.865	605.505	28.533	0.680951	0.604781	0.121487	0.661688	0.685961	2.05351	0.752502	34.587	1141.79	0.849217	1.07419	0.661688	0.384603	0.225975	0.489295	0.0841027	1.71192	0.292966	2.21063	0.63395	34.4868	1135.9	0.830148	1.21839	1.71192	0.536122	0.0761738	0.303276	1.55e-06	6	985	c
394	264	55	8.71355	1.03174	6.46744	10.4729	505.583	604.429	21.1331	0.619673	-0.477565	0.0463607	1.23958	0.808471	4.23601	0.667929	33.7229	1075.56	1.10607	1.43715	1.23958	0.481062	0.28007	0.611371	0.0343364	2.76389	0.547231	4.05221	0.502344	33.6343	1070.23	1.0645	1.53578	2.76389	0.595066	0.124714	0.429835	2.29e-06	9	635	c
395	191	47	7.51256	1.53034	5.2619	10.3362	591.321	609.025	21.0276	0.812611	1.10585	0.0721292	0.978006	0.748681	2.94575	0.68695	33.0543	1034.94	0.989779	1.27732	0.978006	0.442383	0.256872	0.5601	0.0506309	2.84076	0.36266	3.22861	0.534098	33.0955	1038.92	0.957664	1.42962	2.84076	0.624128	0.102434	0.378188	2.1e-06	7	155	c
396	715	94	14.9147	2.91689	10.766	21.1235	400.845	623.451	39.0725	0.79364	-1.35708	0.0494109	1.06667	0.811012	3.82205	0.684732	33.7644	1077.97	1.08802	1.39011	1.06667	0.45804	0.293876	0.616868	0.0331841	2.56598	0.561019	3.92265	0.535091	33.6948	1073.45	1.07071	1.54557	2.56598	0.596395	0.116058	0.416405	1.89e-06	4	666	c
397	167	40	6.90245	0.973681	5.14132	8.774	478.781	612.886	17.9812	0.697881	1.2354	0.0245034	2.76007	0.801467	7.95115	0.522435	30.3809	873.835	1.24686	1.73822	2.76007	0.616159	0.241473	0.616106	0.0192278	8.33094	0.431101	8.32198	0.377254	30.3885	872.462	1.20792	1.81334	8.33094	0.800619	0.124541	0.462629	2.2e-06	8	157	c
398	426	78	13.3636	5.29235	5.51528	21.8622	25.8529	627.961	45.4403	0.961069	0.891787	0.050663	1.60141	0.741682	4.09969	0.650154	30.3832	867.709	1.11014	1.47958	1.60141	0.52153	0.249152	0.586238	0.0362762	4.05177	0.400214	4.37768	0.516807	30.2534	860.027	1.0889	1.58603	4.05177	0.674748	0.101325	0.394624	8.94e-07	5	453	c
399	550	78	12.8126	1.90722	8.01406	16.2912	161.17	628.137	31.4684	0.642165	-1.41409	0.0459794	1.40408	0.845307	5.53828	0.683182	28.3745	756.996	1.16698	1.50361	1.40408	0.494583	0.324997	0.664868	0.0375403	3.11321	0.648265	5.42551	0.542688	28.195	747.462	1.12333	1.59182	3.11321	0.624578	0.165755	0.500011	1.45e-06	4	985	c
400	289	57	9.17656	1.30697	6.85399	11.8327	736.129	624.034	23.3046	0.681446	-1.45799	0.0587139	1.89707	0.728342	4.49165	0.638253	28.9358	786.995	1.09831	1.44282	1.89707	0.543981	0.241204	0.571681	0.0473159	4.58607	0.36492	4.61062	0.501431	29.0123	791.618	1.0523	1.51839	4.58607	0.685254	0.0815935	0.348091	1.03e-06	4	585	c
401	383	67	10.7405	1.67939	7.0021	14.5443	427.698	628.077	26.3875	0.628546	1.55378	0.063275	1.1465	0.833874	4.45067	0.678704	31.4947	936.642	1.09755	1.40688	1.1465	0.468546	0.311552	0.636396	0.0505607	2.68976	0.611266	4.45964	0.537228	31.4307	933.247	1.06465	1.4983	2.68976	0.609655	0.152026	0.467423	1.93e-06	7	834	c
402	525	78	12.5764	2.00514	8.37536	16.4486	635.129	632.403	32.5929	0.677879	1.33131	0.0778322	2.01884	0.844902	7.50829	0.631849	25.8182	633.122	1.13813	1.47486	2.01884	0.561564	0.308771	0.64529	0.0724477	5.29677	0.593435	7.51405	0.519798	25.6237	621.924	1.105	1.56288	5.29677	0.724606	0.146008	0.467125	1.77e-06	7	511	c
403	492	90	13.6489	5.33388	4.48956	22.141	77.7168	642.461	46.9548	0.948078	1.1341	0.0495983	1.55218	0.750203	4.10689	0.631905	29.1259	796.351	1.09956	1.47165	1.55218	0.521559	0.233271	0.567457	0.0339804	4.17433	0.329624	4.11343	0.477371	28.8184	779.248	1.05207	1.60177	4.17433	0.691161	0.0702474	0.331773	1.13e-06	4	507	c
404	756	109	14.9181	2.25567	8.79085	19.473	509.137	637.213	35.9536	0.601534	-0.984847	0.0508941	0.927208	0.872397	4.63319	0.697377	34.3385	1117.45	1.11431	1.39535	0.927208	0.432257	0.345302	0.664397	0.0343366	2.26917	0.692977	4.69544	0.548742	34.3293	1116.58	1.10186	1.5451	2.26917	0.577014	0.176544	0.508508	1.98e-06	7	624	c
405	613	86	14.315	3.69648	6.89614	20.6448	130.822	641.353	41.698	0.863811	0.83073	0.0715609	1.31709	0.802494	4.33432	0.677175	28.5524	765.864	1.09619	1.40718	1.31709	0.490877	0.300683	0.626295	0.0517037	3.39889	0.483893	4.29282	0.530213	28.3006	751.294	1.06965	1.54053	3.39889	0.652939	0.106771	0.399376	1.3e-06	6	605	c
406	245	61	9.84495	4.17308	3.17627	16.1973	54.5366	639.085	36.6754	0.966284	0.998285	0.0261578	2.27682	0.758199	5.70804	0.542179	30.0992	852.301	1.18992	1.65612	2.27682	0.572325	0.20229	0.557798	0.0229394	5.10056	0.429149	5.4675	0.395184	29.4246	813.178	1.13309	1.7115	5.10056	0.711283	0.103725	0.413222	1.04e-06	6	237	c
407	440	85	12.3662	4.46247	5.0292	19.7701	368.103	645.721	42.0113	0.93636	-1.33468	0.0433492	1.47059	0.820001	5.085	0.63668	31.208	918.322	1.15056	1.51237	1.47059	0.507796	0.284437	0.627993	0.0321858	3.64785	0.541664	4.97945	0.476566	30.9167	900.648	1.11099	1.62406	3.64785	0.663616	0.115487	0.424845	1.62e-06	2	413	c
408	369	80	10.6652	3.14435	3.47729	16.9843	594.664	639.329	31.4381	0.815824	-0.852742	0.0342447	1.50788	0.835265	5.57666	0.615231	30.5431	878.301	1.19178	1.57043	1.50788	0.504668	0.290615	0.643222	0.0252011	3.59866	0.635106	5.93111	0.465602	30.5619	879.298	1.18209	1.68731	3.59866	0.652189	0.152591	0.493213	1.85e-06	7	760	c
409	321	68	10.0105	2.53633	6.09274	14.9658	470.791	640.368	28.846	0.836138	1.15361	0.0551964	0.996567	0.835333	4.026	0.696819	34.0266	1096.45	1.08204	1.36999	0.996567	0.44629	0.318438	0.636246	0.0371864	2.54826	0.589189	4.1015	0.530537	33.7606	1078.43	1.07153	1.5173	2.54826	0.595029	0.129254	0.43491	1.9e-06	8	297	c
410	338	68	9.86948	1.44668	7.1043	12.7672	733.489	644.992	23.8855	0.600353	-1.17475	0.0480225	1.30719	0.84351	5.17661	0.671317	32.924	1025.03	1.14929	1.47741	1.30719	0.485723	0.319585	0.655671	0.0368878	3.01071	0.630325	5.07211	0.543674	32.8393	1018.88	1.12804	1.58003	3.01071	0.617835	0.184116	0.523588	9.95e-07	5	585	c
411	425	70	11.2374	1.81581	6.72482	13.9108	297.099	646.952	26.2057	0.413866	-0.637495	0.0338225	1.71383	0.832962	6.13007	0.608264	30.2443	862.237	1.20241	1.59462	1.71383	0.537761	0.289008	0.645363	0.0228816	4.99732	0.546416	6.5087	0.454942	30.1555	856.329	1.18496	1.75394	4.99732	0.721174	0.122265	0.451886	1.64e-06	9	400	c
412	239	49	8.36181	1.1466	6.53329	10.5168	322.808	644.429	21.6545	0.67499	-1.09477	0.0220907	3.15535	0.818193	9.67776	0.497613	27.1024	697	1.3062	1.78592	3.15535	0.639123	0.262992	0.646309	0.0171034	8.86458	0.435419	8.85059	0.371709	26.3125	651.18	1.23977	1.86237	8.86458	0.833627	0.119696	0.459451	1.65e-06	5	229	l
413	645	104	15.1396	5.143	5.9142	24.164	529.357	657.846	48.0101	0.923753	-1.03596	0.0792391	0.822157	0.763129	2.73545	0.71381	34.1424	1105.01	0.992924	1.24754	0.822157	0.414482	0.277334	0.575161	0.0622496	1.81273	0.431859	2.59531	0.587872	33.9764	1096.1	0.938061	1.35175	1.81273	0.538249	0.0855667	0.337371	1.7e-06	5	946	c
414	246	55	8.77018	2.53718	3.87665	12.9724	109.918	649.333	26.9517	0.87548	1.08755	0.0414875	1.65688	0.77378	4.66212	0.597226	30.0406	849.348	1.1208	1.49423	1.65688	0.512601	0.255728	0.595621	0.0347376	4.10837	0.471199	4.88461	0.423496	29.8325	837.756	1.08663	1.54879	4.10837	0.661843	0.129586	0.439478	1.19e-06	3	256	c
415	572	91	13.6423	3.73896	6.39085	20.5455	419.945	653.574	40.0025	0.85552	-1.24006	0.0333797	1.62184	0.884682	8.03199	0.656572	30.4269	876.975	1.26409	1.62464	1.62184	0.517497	0.348353	0.704321	0.022027	3.85081	0.719822	7.87207	0.510137	30.2903	867.008	1.24948	1.77299	3.85081	0.66782	0.191777	0.559869	1.61e-06	6	834	c
416	381	70	10.7731	1.8521	7.56934	15.3821	676.258	649.664	26.2184	0.655762	-0.986212	0.0661041	1.13685	0.782521	3.6137	0.675892	31.0456	909.232	1.04705	1.35392	1.13685	0.469216	0.266168	0.583195	0.0454454	3.28481	0.367756	3.59774	0.527779	30.962	904.698	1.00218	1.49612	3.28481	0.648937	0.0606103	0.298789	1.42e-06	6	1099	c
417	415	67	11.2555	1.66395	8.70886	15.199	610.412	655.448	28.094	0.703104	1.15214	0.0644341	1.3939	0.812493	4.71692	0.690684	28.5373	764.044	1.14078	1.45762	1.3939	0.495109	0.329476	0.661271	0.0587867	3.32418	0.538713	4.60315	0.587046	28.4121	757.496	1.09163	1.51284	3.32418	0.635437	0.193516	0.526152	1.64e-06	7	760	c
418	371	64	10.673	2.46211	6.99068	15.1191	449.275	657.965	30.7542	0.8422	-1.34005	0.036316	1.60029	0.856685	6.58314	0.635907	30.4756	877.402	1.20665	1.57156	1.60029	0.515719	0.314796	0.666394	0.0258854	4.31595	0.621826	6.7063	0.471238	30.4325	874.102	1.18201	1.70508	4.31595	0.692647	0.15872	0.504671	1.62e-06	5	326	c
419	370	67	10.79	2.81855	6.5715	16.2239	543.194	668.086	31.9025	0.861881	-1.23417	0.042542	1.37987	0.866427	6.16524	0.621204	31.3358	928.631	1.18035	1.50907	1.37987	0.493846	0.335679	0.675249	0.0286968	4.16181	0.598017	6.1766	0.428399	30.9061	900.989	1.16654	1.67826	4.16181	0.67885	0.141653	0.475125	1.56e-06	6	946	c
420	324	56	9.7496	0.924868	8.00562	11.8088	715.679	669.877	22.5469	0.497571	-1.30895	0.0483318	1.47448	0.762547	4.10477	0.633242	31.0427	907.056	1.10756	1.46423	1.47448	0.505785	0.24544	0.579758	0.0409671	3.05926	0.433675	3.70097	0.49386	30.9407	901.892	1.03844	1.52775	3.05926	0.62474	0.0781151	0.341744	1.01e-06	6	298	c
421	766	122	15.2663	3.97537	5.73641	22.1601	681.18	674.846	43.5936	0.808749	0.431651	0.053282	0.856993	0.857056	3.99766	0.693552	32.0409	968.369	1.1017	1.37182	0.856993	0.414066	0.341469	0.65694	0.0381951	1.99705	0.659022	3.92842	0.557126	31.9028	959.731	1.0805	1.49834	1.99705	0.551321	0.168086	0.490302	1.17e-06	3	1099	c
422	446	72	12.3118	3.46123	6.55592	17.6331	43.4804	673.496	36.5443	0.890395	0.656266	0.0822741	1.12349	0.788302	3.65352	0.695163	29.5872	825.22	1.02619	1.30164	1.12349	0.467196	0.2878	0.595316	0.0683787	2.81443	0.470248	3.65637	0.566157	29.4227	816.869	0.978741	1.38947	2.81443	0.621335	0.0899454	0.35023	7.32e-07	5	12223	c
423	347	64	10.2697	2.3069	5.65757	14.2097	592.247	673.426	29.0145	0.78684	-1.2937	0.0330013	2.28527	0.825563	7.55042	0.593887	27.0721	689.465	1.27387	1.68858	2.28527	0.582159	0.303154	0.673073	0.0234657	5.25263	0.539884	6.70794	0.435925	26.5649	660.508	1.20887	1.78353	5.25263	0.722121	0.136826	0.480057	1.46e-06	7	340	c
424	591	93	13.891	4.19983	6.60346	20.8464	567.849	680.946	41.7786	0.883434	-1.38686	0.0461043	0.96098	0.867571	4.62829	0.691159	31.177	914.196	1.16622	1.45437	0.96098	0.434368	0.361153	0.687921	0.0322993	2.6	0.647337	4.68624	0.548383	31.2133	917.627	1.1221	1.59454	2.6	0.592355	0.187932	0.530669	1.38e-06	8	12223	c
425	193	44	7.45383	1.48888	4.73104	9.87748	194.085	673.555	21.0234	0.791263	-1.3887	0.0345779	2.7215	0.769697	6.90853	0.538123	28.8196	783.961	1.1963	1.65031	2.7215	0.616525	0.239804	0.601797	0.0268368	7.35032	0.380914	6.93643	0.389577	28.3185	754.091	1.15791	1.72337	7.35032	0.79525	0.124058	0.45147	1.24e-06	4	194	l
426	168	59	6.98244	2.51612	1.93525	11.5831	404.84	681.601	21.9162	0.851036	-1.06517	0.093547	0.795775	0.665464	2.18937	0.703521	36.7289	1291.05	0.85288	1.09674	0.795775	0.402434	0.202359	0.467755	0.0710059	1.86923	0.25945	2.26206	0.563846	36.8846	1303.38	0.826266	1.17362	1.86923	0.538046	0.0311059	0.190799	1.2e-06	3	110	c
427	276	54	9.00698	1.39501	5.93347	11.4238	243.635	687.774	22.7448	0.666076	-1.08791	0.0385279	2.11596	0.717208	4.74119	0.581883	29.5986	823.139	1.13301	1.54802	2.11596	0.562487	0.216549	0.559774	0.0286825	5.22458	0.364349	5.10963	0.416393	29.4534	815.297	1.09704	1.63081	5.22458	0.717608	0.092856	0.383192	1.23e-06	6	268	l
428	320	69	9.81586	1.57205	6.38414	12.7798	531.327	691.408	22.8927	0.510359	-0.196003	0.0501268	1.53912	0.827732	5.46724	0.65196	29.8383	838.682	1.16167	1.50758	1.53912	0.52125	0.306192	0.64822	0.0394679	4.01465	0.545683	5.41833	0.528403	29.641	826.785	1.12565	1.57998	4.01465	0.669483	0.157194	0.486082	1.21e-06	4	12223	c
429	180	46	7.23084	1.38567	4.38517	9.5787	428.09	691.807	18.4844	0.687038	-0.962441	0.0961224	0.739403	0.716224	2.3028	0.74898	36.4662	1269.09	0.904731	1.12964	0.739403	0.396764	0.265228	0.54044	0.088803	1.18382	0.470747	2.11839	0.646324	36.4338	1270.77	0.832105	1.157	1.18382	0.456026	0.135848	0.393927	1.08e-06	4	12223	c
430	122	32	5.83087	0.536756	4.41168	6.73798	191.651	691.648	13.7659	0.534332	-1.33856	0.10329	0.775701	0.692671	2.262	0.718692	35.1636	1178.53	0.896051	1.1504	0.775701	0.404683	0.228624	0.506875	0.0666025	1.7234	0.338431	2.30251	0.585106	35.2128	1184.16	0.851844	1.24309	1.7234	0.527371	0.0811077	0.315836	1.05e-06	3	119	l
431	155	42	6.54716	0.743303	5.48038	8.1291	626.477	694.793	15.6594	0.481999	1.23795	0.0478001	1.17122	0.85857	5.14063	0.632969	31.8707	962.16	1.10107	1.39272	1.17122	0.456733	0.334121	0.654241	0.0379266	3.86885	0.540071	5.20593	0.445516	31.4918	937.738	1.08156	1.50341	3.86885	0.655336	0.150707	0.466182	1.12e-06	4	12223	c
432	462	67	11.7518	1.13423	9.57204	14.2047	381.93	17.5684	27.7091	0.559141	0.693762	0.0715796	1.20648	0.836874	4.69799	0.681727	30.0856	853.549	1.10347	1.38549	1.20648	0.478875	0.34278	0.660494	0.0475547	3.10269	0.593917	4.82027	0.539825	29.802	835.823	1.10275	1.52699	3.10269	0.635627	0.158302	0.480495	8.2e-07	5	542	c
433	301	58	9.29804	1.87704	4.26563	11.9304	42.3499	18.2191	24.9803	0.745951	-0.676341	0.031307	1.66273	0.825551	5.76567	0.598514	32.1245	973.812	1.19863	1.58278	1.66273	0.522772	0.28184	0.63643	0.022471	4.51984	0.536207	5.8727	0.437662	31.7976	952.863	1.1726	1.72054	4.51984	0.70056	0.114835	0.43486	5.4e-07	3	2454	c
434	367	67	10.3035	1.62691	5.10013	12.6389	592.773	21.4144	25.2606	0.596042	0.161526	0.0382003	1.49852	0.83308	5.48871	0.626486	31.5371	938.047	1.17937	1.54024	1.49852	0.512626	0.291023	0.638901	0.0295327	3.74172	0.523323	4.92479	0.472308	31.053	907.808	1.12221	1.64968	3.74172	0.669442	0.104922	0.408605	7.72e-07	4	4640	c
435	186	45	7.3569	1.13072	4.87371	9.46325	12.2591	20.844	18.5316	0.663486	0.619117	0.0640525	1.20513	0.744483	3.35821	0.646784	33.6275	1070.87	1.02923	1.34043	1.20513	0.472263	0.253173	0.567413	0.0490131	2.6	0.43054	3.28287	0.491562	33.2483	1047.07	0.990948	1.42193	2.6	0.585666	0.0938488	0.361464	4.54e-07	3	382	c
436	111	33	5.53333	0.972203	3.53092	7.12534	840.762	23.6907	14.3553	0.693934	1.51783	0.16001	0.509091	0.576524	1.60109	0.782857	35.7818	1230.26	0.733811	0.906047	0.509091	0.341125	0.180368	0.405478	0.111358	1.03333	0.284952	1.72256	0.683333	35.8556	1235.78	0.728246	1.02224	1.03333	0.450641	0.0540685	0.234997	6.81e-07	2	202	c
437	754	102	14.6535	2.75034	5.96682	17.9808	180.223	34.1482	35.3436	0.493106	-0.95377	0.0386725	0.935586	0.915379	6.5281	0.686229	31.1946	918.616	1.23736	1.51906	0.935586	0.429735	0.410974	0.737717	0.0265651	2.61027	0.755314	6.33393	0.518471	30.8187	894.873	1.21894	1.68574	2.61027	0.602809	0.212302	0.574405	9.2e-07	5	1424	c
438	517	81	12.586	2.02074	8.35124	16.4599	652.479	36.7736	30.5094	0.618076	0.875582	0.087112	0.570166	0.838626	2.7666	0.764189	35.6991	1211.95	0.979369	1.17071	0.570166	0.356651	0.363126	0.636503	0.0578332	1.40227	0.612114	2.80758	0.614586	35.5614	1203.19	0.958502	1.32808	1.40227	0.492702	0.164528	0.460293	9.01e-07	6	4640	c
439	468	73	11.8814	1.83881	8.89277	15.83	352.49	33.7371	30.2161	0.710929	-0.24387	0.0635515	0.745121	0.893547	4.49978	0.724569	31.5419	938.909	1.11733	1.3461	0.745121	0.398605	0.412905	0.709662	0.0449941	2.03171	0.719873	4.62641	0.578809	31.5732	940.097	1.11626	1.52168	2.03171	0.56524	0.214798	0.553735	9.85e-07	5	2813	c
440	397	76	10.8631	1.30111	8.31523	13.4237	607.135	38.3433	24.4903	0.386294	0.717714	0.0697679	0.658167	0.866691	3.46857	0.732116	33.7002	1073.44	1.07775	1.28875	0.658167	0.372787	0.396632	0.686619	0.0469208	1.65465	0.654952	3.39772	0.57988	33.3604	1052.1	1.04687	1.44667	1.65465	0.517432	0.184068	0.504167	9.17e-07	5	4640	c
441	774	91	15.2443	1.30253	12.2619	17.3421	214.533	45.6228	34.5841	0.46093	1.36	0.0415596	1.39775	0.876333	6.6513	0.649384	29.2106	804.445	1.22424	1.56188	1.39775	0.50407	0.346831	0.693357	0.0283451	3.99855	0.621244	6.27852	0.49632	28.7544	776.741	1.19306	1.72263	3.99855	0.685443	0.148756	0.491759	1.02e-06	5	844	c
442	623	83	13.7746	2.6699	9.80587	18.9307	944.158	47.5139	37.9861	0.804209	1.36301	0.046243	1.56175	0.839151	5.85472	0.634814	27.3624	703.439	1.17881	1.53684	1.56175	0.520507	0.29363	0.640901	0.0368621	3.97222	0.548801	5.40185	0.484699	27.0019	683.393	1.12218	1.62707	3.97222	0.676235	0.112561	0.419996	8.68e-07	3	743	c
443	528	88	13.5476	4.74605	5.4508	22.485	630.426	53.5266	44.1842	0.924226	1.23637	0.0823037	0.587814	0.839958	2.83644	0.758321	25.8945	626.837	0.993137	1.1926	0.587814	0.360587	0.357315	0.636223	0.0581705	1.31532	0.658903	2.92806	0.625808	25.7162	617.638	0.99292	1.3491	1.31532	0.481581	0.175328	0.477891	1.03e-06	6	4640	c
444	733	90	15.0967	2.69219	9.59507	20.036	51.5272	49.1813	40.2479	0.754808	0.478824	0.0376099	1.28613	0.923619	9.4191	0.655603	27.929	742.659	1.27813	1.58839	1.28613	0.488045	0.420073	0.755176	0.0258817	4.00453	0.755017	9.17309	0.499591	27.5151	717.737	1.26535	1.76094	4.00453	0.689017	0.224994	0.600072	7.42e-07	5	2454	c
445	592	91	12.9724	3.35297	5.36484	18.3444	368.344	50.3553	37.0058	0.792416	0.0347261	0.0550478	0.91391	0.87518	4.66091	0.694616	32.5106	999.227	1.11802	1.39165	0.91391	0.429922	0.360054	0.676192	0.0362186	2.63086	0.654696	4.80949	0.521056	32.1777	977.929	1.1081	1.56414	2.63086	0.604623	0.156371	0.482751	1.11e-06	9	2813	c
446	564	76	13.1827	1.91463	10.0694	17.319	854.838	58.1513	33.5833	0.741945	-0.80997	0.129432	0.371752	0.837977	2.14722	0.829428	24.6221	568.412	0.869317	0.995431	0.371752	0.299992	0.407292	0.63164	0.0906451	0.820359	0.660345	2.20764	0.709581	24.517	563.147	0.870883	1.12745	0.820359	0.406999	0.202961	0.474162	9.84e-07	5	1781	c
447	548	78	12.974	1.68086	10.0997	16.5833	994.443	57.1655	32.1647	0.679946	0.640524	0.050501	1.2714	0.891834	6.8771	0.678289	27.8093	730.947	1.18773	1.49312	1.2714	0.486559	0.372332	0.70353	0.0402168	3.41856	0.693581	6.57824	0.549134	27.3938	707.356	1.15526	1.60995	3.41856	0.652013	0.195005	0.542038	8.02e-07	5	1460	c
448	50	21	3.56646	0.527371	2.39093	4.38638	141.663	49.6947	9.45559	0.687936	-0.680128	0.166988	0.540373	0.417116	1.46353	0.74472	38.2671	1416.01	0.654687	0.828329	0.540373	0.326318	0.106604	0.298424	0.119141	1.3125	-0.0566038	1.62109	0.56875	37.875	1387.99	0.634952	0.938472	1.3125	0.427383	0.0205087	0.138775	9.92e-07	6	251	c
449	278	59	9.18402	2.71825	4.55406	13.5175	408.69	53.1395	28.3261	0.884524	0.26297	0.0457861	1.2329	0.811967	4.27843	0.637498	34.0159	1095.77	1.09343	1.43403	1.2329	0.467555	0.280144	0.610924	0.0298271	3.73423	0.460162	4.45866	0.457683	33.6532	1071.43	1.07513	1.61117	3.73423	0.65505	0.112555	0.418119	1.09e-06	7	2813	c
450	174	54	7.38156	1.64143	4.2951	11.2383	86.5126	53.2297	18.9219	0.701897	-0.0714438	0.0670941	0.934454	0.702329	2.56961	0.657815	36.3765	1261.45	0.934908	1.21167	0.934454	0.411141	0.219881	0.508612	0.0695219	2.64706	0.261416	2.79198	0.489718	36.0924	1244.02	0.885855	1.24677	2.64706	0.573273	0.0470068	0.241354	8.91e-07	4	2454	c
451	530	78	13.1436	3.15671	9.00213	18.642	677.212	71.3003	37.356	0.858953	0.966704	0.0778072	0.843088	0.832811	3.52136	0.731813	32.9339	1026.28	1.04283	1.28675	0.843088	0.420454	0.354595	0.652457	0.0603744	1.92747	0.587627	3.33705	0.610338	32.6835	1010.28	1.01558	1.3974	1.92747	0.551358	0.157737	0.46132	1.12e-06	5	4640	c
452	224	65	8.18744	2.09247	3.66309	11.7206	868.885	73.0455	21.3114	0.626175	0.868464	0.0275001	1.8376	0.855255	7.34772	0.563495	30.6176	887.85	1.21872	1.61192	1.8376	0.537044	0.300783	0.659431	0.0218939	5.78286	0.560472	7.57848	0.383537	30.2514	864.755	1.1959	1.73249	5.78286	0.734725	0.132415	0.466713	1.1e-06	5	1781	c
453	328	66	10.1149	2.12513	5.23745	14.0413	1017.65	72.4556	26.6653	0.724895	1.02507	0.0541939	1.93787	0.785875	5.52508	0.606372	28.0739	741.78	1.1366	1.51608	1.93787	0.558252	0.252051	0.595129	0.0393521	4.31321	0.459844	4.99256	0.463431	27.6642	717.749	1.09175	1.57908	4.31321	0.693436	0.0961703	0.384001	7.8e-07	5	1460	c
454	366	69	10.9413	3.19577	5.59131	16.4278	500.84	75.8129	33.2404	0.873072	0.698232	0.0428312	1.37658	0.833855	5.14272	0.632434	31.8494	957.057	1.15958	1.50366	1.37658	0.496188	0.309476	0.65066	0.0301741	3.65232	0.558551	5.13673	0.481932	31.4338	930.8	1.13682	1.6257	3.65232	0.663753	0.144646	0.473189	1.14e-06	2	871	c
455	465	81	12.2341	3.55478	6.2439	19.1888	542.157	81.3637	37.4284	0.87197	1.21897	0.0299031	1.36242	0.878657	6.6139	0.608329	30.8982	900.312	1.24657	1.59012	1.36242	0.48233	0.354386	0.704163	0.0205546	3.76786	0.657899	6.50694	0.432717	30.4821	874.928	1.21326	1.74827	3.76786	0.652944	0.169296	0.52562	1.16e-06	4	1323	c
456	368	73	10.3638	1.87335	5.17099	13.5348	411.646	74.1652	26.1215	0.671693	-0.226055	0.0502454	1.03257	0.854263	4.54259	0.678238	33.265	1046.87	1.11323	1.41675	1.03257	0.451118	0.328798	0.653717	0.0322989	2.8961	0.614117	4.75257	0.516877	33.0519	1031.97	1.11673	1.58744	2.8961	0.619167	0.155725	0.484924	1.23e-06	7	2813	c
457	91	31	4.96173	0.899416	3.23161	6.21845	365.779	69.3649	11.9717	0.434473	0.0545959	0.161985	0.61039	0.455626	1.56063	0.753247	37.2078	1333.78	0.709182	0.91986	0.61039	0.367612	0.114068	0.324509	0.153194	0.933333	0.0661479	1.49972	0.673333	37.0333	1326.88	0.62155	0.903634	0.933333	0.421741	0.0334226	0.17392	1.22e-06	8	2813	c
458	280	68	9.37861	2.37836	4.77307	13.4652	830.386	76.0344	23.1304	0.599073	-0.541029	0.051759	1.05506	0.810523	3.78413	0.663463	32.2422	981.599	1.07307	1.3696	1.05506	0.447115	0.300819	0.619892	0.0428817	2.51174	0.523345	3.63476	0.516778	31.7512	952.271	1.02263	1.46758	2.51174	0.593686	0.115777	0.406231	1.11e-06	6	1781	c
459	287	60	9.0828	1.19082	6.12112	11.5802	390.407	76.5576	21.0855	0.397381	-0.198097	0.0388291	1.20554	0.89442	6.70916	0.655354	31.0526	912.371	1.20732	1.51663	1.20554	0.476513	0.3816	0.714779	0.0298477	3.26549	0.666029	5.88887	0.501161	30.3009	865.439	1.16072	1.62191	3.26549	0.628663	0.211575	0.564535	1.25e-06	9	2813	c
460	479	96	12.3364	2.98969	5.84354	17.3638	631.563	84.5788	30.0658	0.447602	-0.537758	0.0335119	2.45163	0.887396	11.8861	0.558708	26.7871	690.195	1.30958	1.72051	2.45163	0.598327	0.3347	0.706557	0.0285079	7.55808	0.656666	12.0069	0.402105	26.0884	651.722	1.2841	1.82984	7.55808	0.790665	0.177985	0.548248	1.19e-06	5	4640	c
461	797	112	15.6217	3.22621	8.36881	21.5498	50.8662	87.3927	39.401	0.626257	0.763279	0.0420259	1.00401	0.869137	4.83608	0.680452	32.7029	1009.02	1.16447	1.46454	1.00401	0.443703	0.346859	0.677591	0.0273173	2.69741	0.647989	4.83142	0.518714	32.2939	982.97	1.14364	1.63648	2.69741	0.606181	0.156215	0.492112	8.66e-07	6	1012	c
462	534	75	12.6798	1.85234	9.37397	16.3505	983.967	84.2994	31.9403	0.697365	0.335788	0.0579232	0.828258	0.863045	4.02382	0.709885	31.008	906.042	1.0952	1.34506	0.828258	0.412516	0.363098	0.670364	0.0432073	1.97419	0.667655	3.9701	0.564928	30.7699	892.565	1.06031	1.47334	1.97419	0.552276	0.16946	0.488614	9.88e-07	7	772	c
463	195	64	7.23799	1.93577	1.66448	10.5722	562.408	86.2373	19.3712	0.626354	0.943175	0.0588618	1.25976	0.637682	2.73847	0.627566	35.7853	1217.69	0.971495	1.31612	1.25976	0.467972	0.168913	0.464312	0.0475907	2.86331	0.269734	2.96046	0.490016	35.6403	1208.52	0.948159	1.42835	2.86331	0.604047	0.0449611	0.252162	1.18e-06	4	1323	c
464	322	61	9.67432	1.15132	7.61362	12.0361	943.458	87.8708	22.6468	0.458588	0.640993	0.0466242	1.60693	0.813104	5.299	0.630267	29.377	813.143	1.13601	1.4749	1.60693	0.528537	0.290238	0.627629	0.0342631	3.7803	0.516004	4.9053	0.48068	29	790.418	1.097	1.57635	3.7803	0.670515	0.112104	0.413193	1.13e-06	4	505	c
465	185	50	7.64868	2.39043	2.44205	11.4719	18.351	92.3705	23.317	0.871753	1.34876	0.0639606	1.09274	0.641112	2.52239	0.639104	35.711	1213.86	0.942297	1.25446	1.09274	0.441472	0.172342	0.458999	0.057593	2.13636	0.249244	2.42281	0.504545	35.2576	1186.16	0.868527	1.28384	2.13636	0.536803	0.052386	0.258328	6.93e-07	2	352	c
466	93	36	5.17865	1.74588	2.30823	7.92641	162.424	95.0379	17.0474	0.87976	-1.44337	0.0545421	1.76129	0.501367	2.76612	0.548577	34.6065	1139.06	0.935129	1.33422	1.76129	0.514256	0.129465	0.410656	0.0696282	5.28986	-0.0797659	3.44954	0.386235	34.4493	1131.68	0.875948	1.28161	5.28986	0.686429	0.0508039	0.254215	1.21e-06	6	231	c
467	237	54	8.76782	2.50577	4.59409	12.8925	492.478	95.3638	26.861	0.888029	0.462445	0.0501242	1.09871	0.776501	3.45797	0.63819	33.886	1086.56	1.05578	1.37361	1.09871	0.443386	0.260553	0.580817	0.0344289	2.79058	0.447265	3.52433	0.484663	33.4712	1060.04	1.02539	1.52956	2.79058	0.597281	0.0723495	0.329348	1.24e-06	4	871	c
468	190	49	7.33389	1.59837	3.84736	9.8864	659.109	97.5217	20.2872	0.767644	-1.31968	0.173642	0.423423	0.684944	1.67198	0.80991	37.6246	1364.46	0.716748	0.853446	0.423423	0.317301	0.260849	0.475254	0.133452	0.816456	0.361976	1.63983	0.713291	37.7532	1375.58	0.687828	0.913246	0.816456	0.411536	0.0647923	0.243557	1.23e-06	6	275	c
469	269	55	8.98748	1.65708	6.32795	12.0139	848.856	97.3477	24.1597	0.76448	-0.889222	0.0460345	1.4051	0.808399	4.66674	0.624892	30.4194	871.65	1.12112	1.4612	1.4051	0.493275	0.278664	0.61395	0.0306198	3.89545	0.504306	4.92929	0.452265	30.0318	848.973	1.09825	1.62178	3.89545	0.673014	0.0994965	0.395188	1.25e-06	6	435	c
470	442	79	12.1719	3.76043	6.43916	19.2125	367.142	96.9703	39.7871	0.913195	-0.260593	0.0297101	2.03431	0.875459	9.16725	0.570962	28.011	743.938	1.30329	1.68522	2.03431	0.563692	0.340425	0.706478	0.0214584	5.76613	0.622241	8.63202	0.411238	27.3091	703.196	1.26237	1.81309	5.76613	0.745822	0.164767	0.527138	1.32e-06	7	654	c
471	361	74	10.933	3.05071	5.88631	17.0294	417.245	101.047	32.225	0.873108	-0.466806	0.0553534	0.957382	0.824373	3.72561	0.691172	33.2922	1047.39	1.08282	1.35904	0.957382	0.43897	0.325768	0.640885	0.0389494	2.25352	0.572096	3.63321	0.537862	32.7887	1015.68	1.04922	1.50701	2.25352	0.575185	0.134748	0.442337	1.34e-06	8	1124	c
472	414	71	11.1389	2.18728	7.50392	14.0817	573.843	101.986	30.6218	0.780226	-0.105014	0.0331139	1.70711	0.896573	9.25272	0.626334	29.604	834.173	1.26909	1.64982	1.70711	0.537226	0.338345	0.699462	0.025852	4.99718	0.699016	9.3014	0.487914	29.2056	810.118	1.24299	1.77263	4.99718	0.718469	0.175882	0.538085	1.24e-06	4	1323	c
473	260	51	8.65508	0.876877	7.29269	10.2731	760.485	105.122	21.5732	0.633266	-1.31908	0.0720411	2.5857	0.734333	5.86643	0.589948	28.47	765.441	1.11019	1.49282	2.5857	0.605874	0.224402	0.560632	0.0727683	6.23585	0.277655	5.31639	0.489944	27.8679	731.128	1.03327	1.50613	6.23585	0.761064	0.0831422	0.34997	1.24e-06	7	305	l
474	273	69	9.83594	3.68919	4.4485	17.1504	101.669	102.058	33.6849	0.945491	0.0862603	0.0803235	0.928205	0.703929	2.56754	0.688513	23.8287	528.814	0.949214	1.2103	0.928205	0.431354	0.242354	0.532709	0.0557405	2.19469	0.33908	2.66033	0.544508	23.7788	527.041	0.918446	1.34462	2.19469	0.559646	0.0671268	0.298607	1.11e-06	5	1585	c
475	495	88	13.0826	4.15092	6.56367	20.5701	446.531	118.455	41.0458	0.901175	1.523	0.0398683	1.15115	0.876017	5.64236	0.653701	31.1961	917.833	1.18915	1.50507	1.15115	0.464793	0.352795	0.689335	0.029206	3.09398	0.65857	5.53091	0.497514	30.7325	890.086	1.15117	1.64181	3.09398	0.631712	0.178577	0.524647	1.36e-06	5	1583	c
476	293	55	9.26009	1.30965	6.04145	11.1228	460.871	108.902	22.073	0.546151	-0.999328	0.0578846	0.842204	0.82985	3.47489	0.689823	33.8338	1082.83	1.06535	1.32744	0.842204	0.407406	0.324748	0.634263	0.0413906	2.23554	0.563269	3.5594	0.530651	33.5909	1068.07	1.03219	1.47244	2.23554	0.570665	0.131808	0.433138	1.33e-06	5	1583	c
477	403	78	11.3329	3.11211	5.43222	17.9921	126.849	113.707	33.7344	0.85152	0.259259	0.0861507	0.662144	0.803951	2.68872	0.747083	25.0299	585.406	0.960921	1.17953	0.662144	0.38282	0.318875	0.600627	0.0617211	1.73088	0.548214	2.91559	0.609682	25.0227	585.23	0.954035	1.32374	1.73088	0.536657	0.136597	0.420004	1.2e-06	5	1585	c
478	297	78	10.3205	4.14972	3.31816	16.7189	634.009	115.918	36.0504	0.931748	1.2526	0.0932843	0.894587	0.600677	2.12013	0.701994	36.3514	1262.08	0.876171	1.15349	0.894587	0.427361	0.170286	0.439568	0.0683768	2.05702	0.144157	2.20175	0.566538	36.3377	1263.5	0.830733	1.26045	2.05702	0.551167	0.0357253	0.211692	1.28e-06	5	4640	c
479	85	37	4.9006	1.52127	2.47028	7.80815	824.142	106.697	13.3432	0.70595	-0.839246	0.133468	0.647059	0.550177	1.71924	0.742647	25.4265	610.641	0.760475	0.957909	0.647059	0.375163	0.159682	0.391346	0.0785322	1.83333	0.0380567	1.95293	0.55	25.2778	603.625	0.749297	1.14397	1.83333	0.51593	0.0225102	0.160337	1.28e-06	6	1043	c
480	230	52	8.42678	2.133	4.17839	11.8937	1001.1	107.903	24.7354	0.844115	0.45941	0.0400585	2.31522	0.733314	5.34071	0.557822	28.1075	741.534	1.15408	1.55613	2.31522	0.58669	0.22265	0.568206	0.0448653	5.44	0.302614	4.90028	0.454491	27.4057	704.886	1.04808	1.51723	5.44	0.736217	0.0902626	0.365529	1e-06	6	306	c
481	605	84	13.6412	2.69108	9.72584	19.0375	391.399	116.35	36.9691	0.806029	-0.10686	0.0383247	1.27089	0.869508	5.8696	0.673667	30.8171	894.83	1.20925	1.53096	1.27089	0.480448	0.356519	0.696653	0.0252864	3.60185	0.660386	6.30286	0.527323	30.6204	882.998	1.20288	1.69652	3.60185	0.654011	0.200909	0.561598	1.36e-06	7	1124	c
482	604	81	13.5692	1.81694	10.1766	17.4909	969.527	122.457	32.4086	0.610811	-0.980628	0.0678396	0.995601	0.792789	3.40238	0.710952	30.5187	877.063	1.04924	1.32292	0.995601	0.439881	0.31153	0.621491	0.0500699	2.1126	0.529524	3.24517	0.580424	30.2767	863.744	1.00428	1.42076	2.1126	0.553765	0.138177	0.436044	1.19e-06	8	748	c
483	499	80	12.7948	3.24363	7.8125	18.7393	804.193	120.903	35.6698	0.841259	-0.420381	0.132385	0.50324	0.743601	1.98136	0.786609	23.9665	537.238	0.862065	1.03174	0.50324	0.341594	0.296232	0.54906	0.0955142	1.02108	0.494043	2.00906	0.6637	23.897	534.176	0.850029	1.15992	1.02108	0.439609	0.105771	0.348566	1.31e-06	5	1043	c
484	312	58	9.53498	1.22842	7.02749	11.9152	878.967	118.728	22.2707	0.459381	0.829293	0.0505286	0.929319	0.845649	4.0104	0.689945	31.9258	962.04	1.08872	1.36967	0.929319	0.426836	0.329212	0.645842	0.0381611	2.1323	0.621667	3.81801	0.532743	31.572	941.479	1.03775	1.47083	2.1323	0.552233	0.17454	0.495149	1.34e-06	5	3199	c
485	665	97	15.0297	4.93681	7.40193	24.0435	902.851	134.316	46.8708	0.90489	-1.08632	0.0526348	1.04865	0.856499	4.65382	0.720474	30.1962	858.01	1.13691	1.42392	1.04865	0.453426	0.369228	0.689367	0.037705	2.33962	0.671462	4.56065	0.595058	30.0309	847.858	1.11799	1.5518	2.33962	0.585043	0.199899	0.539938	1.37e-06	5	3199	c
486	353	81	11.2751	3.8426	4.20103	19.2112	158.35	127.632	35.6424	0.916202	0.326593	0.0387193	1.31363	0.823306	4.71726	0.626649	32.4137	991.248	1.14564	1.4856	1.31363	0.484265	0.297805	0.636689	0.0281519	3.28623	0.520998	4.43029	0.462491	31.8007	953.267	1.09516	1.61724	3.28623	0.633177	0.105279	0.405584	1.25e-06	5	1585	c
487	287	75	10.3378	4.43218	1.07942	18.3512	473.86	128.884	37.7543	0.947916	-0.271696	0.0469215	1.13807	0.805307	3.92272	0.642522	34.8028	1148.06	1.07579	1.40248	1.13807	0.452763	0.267918	0.5933	0.0318716	3.05093	0.483271	3.95216	0.465035	34.3287	1116.54	1.04541	1.55805	3.05093	0.614079	0.091943	0.373397	1.36e-06	6	1583	c
488	593	89	13.8064	3.98449	7.27102	20.7514	931.178	140.067	42.6071	0.885078	1.38392	0.0456329	1.62325	0.86089	6.83441	0.629318	26.5155	662.156	1.2086	1.53638	1.62325	0.52518	0.349886	0.691923	0.032462	4.18324	0.620316	6.50884	0.470013	26.152	641.647	1.17616	1.66429	4.18324	0.686146	0.172591	0.519376	1.34e-06	6	3199	c
489	63	25	4.18624	1.18059	2.11698	5.98344	1012.77	126.964	13.1093	0.87281	0.545095	0.0711124	1.74634	0.491625	2.71757	0.576872	32.9463	1031.85	0.903788	1.25815	1.74634	0.529532	0.112065	0.372484	0.0692149	5.02273	-0.0438516	3.40586	0.378476	33.1136	1042.62	0.895379	1.21106	5.02273	0.682303	0.0715392	0.293145	9.85e-07	6	123	c
490	269	57	8.96178	1.70216	6.33285	12.4766	390.952	140.769	24.0285	0.767071	-0.27672	0.0493757	1.12999	0.820521	4.14797	0.661509	32.8475	1019.98	1.09029	1.41301	1.12999	0.458141	0.293402	0.620346	0.0355916	3.02643	0.558619	4.42837	0.490065	32.7181	1012.54	1.06606	1.55178	3.02643	0.61406	0.132867	0.445158	1.37e-06	6	367	c
491	377	61	10.5738	1.29126	7.59231	12.7859	498.279	146.791	26.4917	0.669962	0.451686	0.0642691	1.29857	0.85241	5.39926	0.667504	30.3743	871.54	1.12977	1.42889	1.29857	0.492164	0.350165	0.674364	0.0426295	3.33851	0.59716	5.14371	0.51765	30.0528	850.466	1.11788	1.56907	3.33851	0.652927	0.154386	0.480499	1.38e-06	2	438	c
492	556	99	12.6931	3.40839	5.27471	18.168	831.625	149.404	37.1289	0.811534	-0.229087	0.0621938	0.890998	0.828965	3.60473	0.703853	32.5436	1002.62	1.03015	1.2947	0.890998	0.427895	0.309997	0.614898	0.0436962	2.17227	0.58459	3.61461	0.551156	32.3361	989.106	1.0181	1.43315	2.17227	0.569702	0.122499	0.412998	1.38e-06	6	1227	c
493	594	83	13.4313	2.12056	9.3735	17.7593	340.087	153.238	34.1547	0.701828	-0.692015	0.0802778	1.18361	0.856811	5.13304	0.680068	30.1491	859.706	1.0913	1.36835	1.18361	0.478002	0.346282	0.660454	0.0613958	3.27326	0.554667	4.67506	0.536814	29.6686	830.186	1.05464	1.4813	3.27326	0.653666	0.130195	0.431741	1.28e-06	2	714	c
494	266	51	8.78507	1.09441	6.16101	11.2379	862.729	151.433	21.8452	0.589798	1.52284	0.0237449	2.28983	0.851008	8.68441	0.544312	26.4399	660.231	1.30459	1.73305	2.28983	0.580266	0.303365	0.679649	0.0179774	6.71171	0.564467	8.70518	0.372598	26.0901	640.085	1.27123	1.87329	6.71171	0.769158	0.137727	0.491943	1.4e-06	6	1227	c
495	318	75	10.634	4.38717	4.03549	17.8428	83.5768	148.917	38.7112	0.957902	-0.0951338	0.105922	1.14908	0.699606	2.91263	0.682825	33.728	1081.87	0.935169	1.21667	1.14908	0.471547	0.245304	0.536989	0.0654989	2.61446	0.321132	2.9256	0.557537	33.3534	1056.91	0.92161	1.34324	2.61446	0.60177	0.0713612	0.307606	1.04e-06	4	429	c
496	127	35	5.89367	0.624164	4.84511	6.9972	963.184	157.485	14.5087	0.569999	-1.42223	0.0479876	1.24215	0.755227	3.53735	0.607623	31.8027	953.851	1.06275	1.38475	1.24215	0.454606	0.259371	0.581489	0.0411728	2.87778	0.32997	3.1475	0.463072	31.2333	921.81	0.966218	1.4488	2.87778	0.595479	0.0781291	0.333349	1.27e-06	7	195	c
497	400	69	10.8802	1.6059	7.80277	14.3623	404.398	165.131	27.2909	0.637463	0.012834	0.040336	1.25118	0.878101	6.13205	0.643629	31.0851	912.593	1.19669	1.51453	1.25118	0.479942	0.361353	0.698032	0.0286979	3.6686	0.642718	6.13405	0.477983	30.7616	892.327	1.17346	1.66578	3.6686	0.666065	0.165922	0.510112	1.39e-06	4	556	c
498	374	64	10.5119	1.09896	8.67441	12.9577	446.905	165.489	25.5167	0.601922	0.759056	0.044827	1.60317	0.832156	5.77579	0.631846	29.7937	836.204	1.18065	1.53287	1.60317	0.527129	0.306331	0.65241	0.0305737	4.54969	0.540569	5.95144	0.486378	29.5124	818.946	1.16299	1.68682	4.54969	0.704298	0.12584	0.45022	1.43e-06	6	488	c
499	378	66	10.539	2.2099	5.4718	14.4075	913.673	167.55	27.7562	0.730768	-1.53676	0.138845	0.46949	0.716119	1.82691	0.793683	29.0625	800.814	0.813984	0.973705	0.46949	0.33102	0.281819	0.522903	0.112082	0.880126	0.453146	1.80472	0.696215	28.9558	795.615	0.790676	1.06329	0.880126	0.421894	0.100932	0.326911	1.39e-06	5	3199	c
500	607	97	14.0784	3.50925	7.14642	20.0437	370.228	177.934	37.898	0.749055	1.43134	0.0472366	1.45559	0.810933	4.8494	0.654167	31.8383	956.831	1.13177	1.48145	1.45559	0.50828	0.27989	0.618484	0.0310007	3.65725	0.533933	4.92353	0.500829	31.6798	946.348	1.11335	1.61912	3.65725	0.665952	0.105801	0.406767	1.33e-06	6	776	c
501	387	66	10.8328	1.27724	8.10374	13.5615	557.73	175.106	25.0497	0.476192	-1.33975	0.0646113	0.814003	0.788865	2.92768	0.699081	35.418	1191.48	1.00024	1.25972	0.814003	0.405209	0.282864	0.582819	0.0411951	2.1358	0.481574	3.05989	0.51968	35.179	1175.32	0.985226	1.43365	2.1358	0.550956	0.083171	0.342029	1.39e-06	2	592	c
502	356	74	10.4881	2.59149	5.28385	15.5033	140.722	172.133	29.8136	0.819853	0.278921	0.0513704	0.912037	0.851576	4.0724	0.693981	33.7269	1075.32	1.10873	1.39157	0.912037	0.428099	0.347244	0.665394	0.0394163	2.62838	0.550373	3.92285	0.528063	33.4324	1056.64	1.06611	1.53481	2.62838	0.604738	0.139921	0.454076	1.22e-06	4	1750	c
503	273	72	9.66044	3.31462	3.57193	16.6911	675.837	178.385	29.4562	0.8517	0.94094	0.121599	0.665625	0.615332	1.8652	0.732187	29.8073	842.891	0.822888	1.04273	0.665625	0.375595	0.190533	0.444021	0.0924067	1.46512	0.20738	1.92422	0.618413	29.7721	842.844	0.778779	1.15057	1.46512	0.505449	0.0299964	0.185558	1.35e-06	3	1507	c
504	308	57	9.64134	1.68054	7.02072	13.0999	836.255	173.457	25.9002	0.772923	-0.438409	0.0343469	1.3	0.865655	5.83828	0.640474	29.8398	837.806	1.2085	1.54692	1.3	0.479281	0.333494	0.679401	0.0242808	3.43701	0.633085	5.68366	0.47407	29.4134	812.529	1.1781	1.70034	3.43701	0.634921	0.153378	0.496055	1.4e-06	5	721	c
505	443	83	12.1225	3.643	7.0916	18.2259	85.6161	175.964	37.6506	0.891897	-0.0515637	0.0398535	1.51627	0.822849	5.27958	0.62124	31.558	939.167	1.1678	1.53026	1.51627	0.509366	0.282057	0.628469	0.0290575	3.79784	0.555021	5.26744	0.468494	31.221	918.816	1.12877	1.65288	3.79784	0.673831	0.11928	0.434902	1.03e-06	3	613	c
506	315	83	10.8428	4.20748	1.72394	18.182	942.418	186.579	36.5095	0.914596	1.09884	0.0677342	0.897849	0.74635	2.76986	0.684409	34.7401	1144.94	0.994683	1.28129	0.897849	0.420552	0.24423	0.547584	0.0480995	2.13765	0.408887	2.80816	0.534878	34.6154	1138.16	0.954397	1.42082	2.13765	0.552834	0.0739821	0.321569	1.33e-06	6	1209	c
507	528	73	12.5922	1.41379	9.78742	15.0719	975.428	192.736	30.1055	0.602461	-0.90751	0.0562225	0.933905	0.870736	4.6124	0.707595	31.6039	941.332	1.14386	1.41059	0.933905	0.435699	0.375421	0.692075	0.0383901	2.35032	0.687105	4.75576	0.567151	31.5435	937.568	1.13144	1.55456	2.35032	0.588715	0.197485	0.537293	1.21e-06	8	6223	c
508	575	102	14.7379	6.04555	3.95187	25.6372	855.592	198.406	53.0904	0.950857	-0.706148	0.0344136	1.63756	0.869567	7.27744	0.627994	30.9146	904.807	1.2273	1.60828	1.63756	0.527832	0.32053	0.677316	0.0285287	4.13404	0.638494	6.7178	0.491468	30.3468	868.784	1.19125	1.70457	4.13404	0.683379	0.154295	0.497978	1.4e-06	5	799	c
509	581	92	13.7249	3.6725	7.95833	20.4235	137.757	196.149	39.8354	0.864235	-0.540789	0.0715633	0.662043	0.860638	3.37527	0.75608	34.8174	1149.44	1.04453	1.26371	0.662043	0.385093	0.378684	0.66772	0.0455463	1.78175	0.646735	3.52183	0.608912	34.6667	1138.59	1.04704	1.44741	1.78175	0.545676	0.161719	0.474157	1.21e-06	5	1750	c
510	471	76	11.9531	2.33292	6.99042	15.2703	167.841	195.809	32.2603	0.754173	-0.0464796	0.0470643	1.92246	0.864367	8.08703	0.615535	27.7742	729.921	1.25075	1.62109	1.92246	0.557211	0.33734	0.694274	0.0414596	4.57474	0.596178	6.66431	0.490532	26.817	674.715	1.19218	1.69518	4.57474	0.706119	0.150733	0.491375	1.25e-06	5	1750	c
511	630	82	13.8509	2.04324	8.70182	17.1141	509.304	205.218	34.5932	0.698586	0.643309	0.044389	1.00674	0.876015	5.05993	0.691328	31.8719	957.456	1.1763	1.47331	1.00674	0.447853	0.365344	0.694555	0.0291008	2.78995	0.648161	4.9648	0.533448	31.5548	937.348	1.1528	1.64716	2.78995	0.618485	0.162331	0.502482	1.51e-06	4	843	c
512	471	81	12.2807	3.88382	4.12916	18.1353	96.6148	202.134	39.0448	0.884733	-0.189511	0.0357926	1.36619	0.878293	6.61262	0.633845	32.1513	979.108	1.19933	1.54656	1.36619	0.494216	0.332968	0.678878	0.0262165	3.86189	0.648759	6.4975	0.478805	31.6726	949.247	1.1584	1.69147	3.86189	0.664339	0.17074	0.52035	1.06e-06	3	591	c
513	535	78	12.577	1.44588	8.43128	15.3843	934.038	209.26	29.7131	0.521863	-1.23657	0.0402367	1.19431	0.892198	6.53932	0.661962	30.8926	902.527	1.20146	1.51644	1.19431	0.474241	0.365014	0.701363	0.0304689	3.12232	0.70541	6.29944	0.516098	30.6416	885.982	1.18137	1.65455	3.12232	0.629272	0.187899	0.538935	1.32e-06	7	1209	c
514	368	62	10.5123	1.91531	7.59465	13.9643	428.301	210.146	28.8691	0.793623	-1.2959	0.0419885	1.50404	0.838962	5.66981	0.63657	30.1218	853.992	1.194	1.53715	1.50404	0.513371	0.325266	0.670513	0.0305267	4.24611	0.570845	5.94705	0.487212	29.7913	834.886	1.16708	1.67913	4.24611	0.692408	0.151765	0.490922	1.49e-06	6	477	c
515	674	89	14.3002	1.84696	10.9099	17.9679	1011.98	212.635	35.447	0.65481	0.883572	0.069866	1	0.888069	5.46704	0.718063	30.7374	893.435	1.13055	1.37796	1	0.452026	0.407965	0.711682	0.0511912	2.30821	0.718165	5.09496	0.593926	30.4355	873.57	1.1183	1.50082	2.30821	0.584419	0.224952	0.562504	9.95e-07	6	6223	c
516	338	62	10.116	2.2207	6.39379	13.7692	451.306	214.092	28.5531	0.816521	-1.33127	0.0319744	1.63315	0.874369	7.49978	0.598744	31.041	912.758	1.23512	1.61312	1.63315	0.517185	0.321917	0.679315	0.0273656	4.37956	0.62467	6.83427	0.447351	30.3504	869.787	1.18138	1.70988	4.37956	0.698079	0.158294	0.504647	1.53e-06	8	397	c
517	562	82	13.0554	1.78901	9.91556	16.6521	322.619	217.199	31.3751	0.572864	-0.946326	0.0558959	1.14252	0.858679	5.04229	0.686813	31.0998	912.117	1.14829	1.44141	1.14252	0.466518	0.350753	0.677002	0.0402788	2.81391	0.630759	4.81039	0.529252	30.6871	886.636	1.12011	1.57563	2.81391	0.60066	0.165822	0.497903	1.25e-06	2	1101	c
518	728	90	14.8119	1.73487	12.1298	18.4397	637.011	216.017	36.3268	0.617117	0.241896	0.0381701	1.32753	0.913432	8.66755	0.668831	27.6068	722.987	1.2697	1.58406	1.32753	0.494113	0.417949	0.752977	0.0265227	3.88584	0.741259	8.50915	0.508933	27.2892	704.097	1.2518	1.73495	3.88584	0.676528	0.240552	0.61461	1.43e-06	6	1190	c
519	534	78	12.6546	1.79979	8.88128	16.2293	681.356	216.007	30.3811	0.511609	1.32408	0.0294806	1.6275	0.897214	8.91693	0.606212	28.3915	764.898	1.28324	1.64975	1.6275	0.526055	0.357868	0.716092	0.0231694	4.73662	0.685337	8.52648	0.465938	27.9015	735.881	1.24607	1.75006	4.73662	0.712541	0.197941	0.564962	1.41e-06	5	757	c
520	234	47	8.20222	0.630529	6.82816	9.06985	794.289	211.361	19.6285	0.5362	1.04755	0.0421268	2.69836	0.737536	6.14042	0.540108	29.0411	795.002	1.16386	1.60011	2.69836	0.61322	0.213277	0.563478	0.0357341	6.66316	0.316244	5.87247	0.420854	28.6526	772.386	1.09253	1.65806	6.66316	0.776304	0.0785989	0.356166	1.38e-06	6	280	l
521	467	77	11.9384	2.20938	7.73403	15.193	222.131	224.478	30.9752	0.722342	-1.48044	0.0817534	1.125	0.805006	3.8847	0.692772	30.981	906.009	1.0545	1.33077	1.125	0.469022	0.312262	0.623589	0.0629508	2.64938	0.508452	3.69494	0.566691	30.6444	885.939	1.01661	1.44988	2.64938	0.606569	0.125736	0.420453	1.27e-06	4	942	c
522	429	75	11.4508	2.8092	4.30524	16.5623	378.571	225.682	31.6257	0.783327	-1.15702	0.119815	0.521189	0.739524	2.00046	0.769007	27.7849	727.799	0.871777	1.04539	0.521189	0.339815	0.287887	0.544434	0.0839595	1.08219	0.49201	2.06517	0.646301	27.7288	725.353	0.855463	1.17507	1.08219	0.445459	0.105349	0.349997	1.39e-06	4	1350	c
523	428	75	11.1094	2.76626	3.78704	14.916	978.508	226.821	30.7545	0.790257	0.998303	0.164944	0.396203	0.721912	1.71237	0.81557	30.3392	875.781	0.787123	0.919743	0.396203	0.30626	0.300068	0.526552	0.131029	0.677686	0.496748	1.67331	0.717355	30.3251	875.792	0.765363	0.99037	0.677686	0.368875	0.128007	0.355908	1.15e-06	6	6223	c
524	382	67	11.1044	2.58015	7.04074	15.7728	550.036	228.868	31.186	0.847122	0.9192	0.0783768	0.862411	0.775629	2.92184	0.714326	33.5972	1068.54	1.01314	1.26716	0.862411	0.425728	0.304635	0.60481	0.0671916	1.6623	0.488848	2.62603	0.603259	33.1311	1040.58	0.948302	1.3299	1.6623	0.522037	0.118827	0.393262	1.53e-06	3	517	c
525	174	39	7.03523	0.607329	5.13743	7.91029	609.376	223.69	16.1181	0.430038	-0.345652	0.0609693	1.25	0.751592	3.51602	0.665889	33.6699	1073.06	1.04705	1.36152	1.25	0.483155	0.25541	0.573392	0.0429451	3.51701	0.380715	3.83957	0.520839	33.6667	1073.67	1.0196	1.47805	3.51701	0.631955	0.114936	0.406115	1.46e-06	6	1190	c
526	582	106	14.2115	4.22071	8.11255	24.307	146.265	231.233	43.1774	0.892671	-0.445795	0.0318028	1.68794	0.874242	7.71104	0.601243	32.027	973.255	1.2358	1.63535	1.68794	0.527473	0.302196	0.664311	0.0204678	4.6917	0.655898	7.81731	0.419962	31.8933	963.552	1.21798	1.79835	4.6917	0.699384	0.134136	0.477328	1.23e-06	7	756	c
527	304	53	9.43143	0.670798	7.89757	10.4626	662.201	239.046	21.1778	0.352233	1.38807	0.0371847	2.21696	0.762513	5.66754	0.582187	29.3009	806.644	1.19055	1.61533	2.21696	0.576268	0.236558	0.593031	0.028637	5.65251	0.418449	5.85986	0.439996	29.027	791.108	1.14655	1.68576	5.65251	0.730316	0.113876	0.429159	1.46e-06	6	365	c
528	571	86	13.2609	2.32411	8.5367	17.3833	29.7095	243.597	34.3814	0.756932	0.121237	0.0502145	1.08013	0.848521	4.56528	0.688353	33.6425	1069.69	1.13842	1.44774	1.08013	0.456406	0.322416	0.653283	0.0335841	2.74745	0.622492	4.63893	0.537115	33.3259	1049.42	1.11386	1.59761	2.74745	0.605885	0.147611	0.474117	6.61e-07	4	1365	c
529	374	66	10.5342	1.60325	6.40472	12.7988	187.841	248.492	26.2004	0.634491	-1.28601	0.0393431	1.36838	0.862059	5.96004	0.634454	30.4895	875.693	1.21114	1.5521	1.36838	0.494757	0.32743	0.674829	0.0256975	3.74295	0.618619	5.9071	0.468825	30.1818	856.816	1.18302	1.71552	3.74295	0.664339	0.137094	0.472377	1.31e-06	7	815	c
530	314	65	9.61472	1.40994	6.45458	12.3238	221.214	247.235	22.0384	0.400976	-0.848057	0.0434548	1.18405	0.811784	4.14546	0.644486	32.9106	1021.76	1.12436	1.4654	1.18405	0.464445	0.283206	0.619161	0.0305023	2.91016	0.53701	4.14279	0.49027	32.6367	1004.82	1.09057	1.60679	2.91016	0.615956	0.118449	0.427964	1.31e-06	5	942	c
531	417	63	11.0844	0.500554	10.0418	12.3731	460.052	248.727	25.1172	0.401934	-1.43744	0.0515964	1.37789	0.873633	6.45194	0.631695	30.491	879.976	1.17299	1.50839	1.37789	0.498009	0.331691	0.671621	0.0396336	4.08708	0.589849	5.9824	0.486469	29.9073	843.444	1.13924	1.65035	4.08708	0.691482	0.13169	0.455601	1.6e-06	10	854	c
532	319	57	9.70953	1.37615	7.16153	12.6729	615.886	250.218	23.8751	0.654096	-1.08397	0.0703492	0.793691	0.804361	3.02846	0.714663	34.6863	1141.38	1.01053	1.26661	0.793691	0.407653	0.29731	0.597882	0.0535881	1.91221	0.483232	2.85017	0.558756	34.4237	1125.04	0.964019	1.38804	1.91221	0.531024	0.104304	0.376365	1.51e-06	8	460	c
533	737	102	15.14	1.98441	11.5686	19.2381	984.169	261.157	32.9065	0.319002	-1.3079	0.064502	0.75469	0.877656	4.08431	0.732612	32.5664	1000.27	1.12294	1.35236	0.75469	0.403594	0.397463	0.699082	0.046166	1.89681	0.690626	4.06557	0.59294	32.4461	992.297	1.11034	1.50188	1.89681	0.55288	0.202297	0.535552	1.07e-06	5	6223	c
534	140	38	6.27755	1.00565	4.27686	8.03787	956.025	249.763	16.6258	0.73448	0.97499	0.0654395	1.06288	0.745632	3.08925	0.653263	34.6369	1138.59	1.00212	1.28698	1.06288	0.4437	0.260296	0.565359	0.0586675	2.44444	0.333352	2.83338	0.503624	34.1414	1108.34	0.923137	1.34762	2.44444	0.573607	0.0706124	0.306484	1.2e-06	6	208	c
535	296	71	9.78516	2.9389	4.91987	15.4958	168.28	250.739	29.4765	0.863191	0.366679	0.0304165	1.68083	0.840872	6.2814	0.58558	31.9981	967.26	1.2115	1.60119	1.68083	0.523883	0.286982	0.644365	0.0244991	5.34783	0.51758	6.5427	0.419037	31.4696	933.528	1.19242	1.73578	5.34783	0.726889	0.125056	0.454637	1.29e-06	5	815	c
536	246	54	8.46418	1.54361	5.70518	11.2016	243.615	257.034	22.802	0.76291	1.27188	0.0424065	1.46249	0.838264	5.52121	0.659203	32.813	1018.77	1.15631	1.50063	1.46249	0.509433	0.302253	0.643375	0.0292087	4.23301	0.547818	5.68065	0.493414	32.6796	1008.59	1.15025	1.62577	4.23301	0.678343	0.151193	0.483207	1.32e-06	5	341	c
537	446	68	11.5195	1.10285	9.18104	13.7005	398.407	258.124	28.0301	0.58038	-1.0159	0.0579367	1.80072	0.872479	8.06047	0.624856	27.1945	701.914	1.20462	1.53465	1.80072	0.547659	0.359672	0.699875	0.0464665	5.08571	0.609323	7.50885	0.489064	26.5403	665.266	1.15687	1.63208	5.08571	0.728725	0.191358	0.540399	1.49e-06	5	490	c
538	328	69	10.7298	3.66773	5.20153	17.3768	715.977	260.227	34.9529	0.923885	1.13236	0.031992	2.07809	0.814619	6.6049	0.563325	30.1839	858.772	1.22821	1.64285	2.07809	0.562857	0.266699	0.629947	0.0239569	5.33588	0.525101	6.61791	0.393454	29.6947	829.354	1.19522	1.75877	5.33588	0.725018	0.119343	0.44728	1.44e-06	6	440	c
539	393	81	11.2904	2.12931	7.12963	14.9964	799.215	260.522	27.8502	0.625175	-0.7663	0.0319171	1.75714	0.783295	5.05423	0.581586	33.2143	1041.38	1.1687	1.57507	1.75714	0.52917	0.241332	0.592427	0.0215723	4.5375	0.494331	5.48663	0.416704	33.2313	1042.29	1.1551	1.72349	4.5375	0.693132	0.0976247	0.402651	1.39e-06	6	1991	o
540	651	91	14.3086	3.56343	6.46428	20.179	920.869	264.865	40.3592	0.836942	0.981613	0.0783892	0.824877	0.802448	3.08775	0.734803	33.5221	1064.03	1.01821	1.26884	0.824877	0.419224	0.31452	0.614173	0.0547122	1.80526	0.546814	2.99175	0.606575	33.3947	1055.98	0.993839	1.40302	1.80526	0.54223	0.121143	0.40682	1.27e-06	2	796	c
541	307	61	9.51415	1.20295	7.03279	11.9569	429.58	258.452	22.681	0.554405	0.857189	0.0459029	1.74398	0.794533	5.24395	0.647887	30.6093	882.999	1.15139	1.52862	1.74398	0.539869	0.278061	0.624202	0.0341494	4.65385	0.462803	5.3316	0.503143	30.4769	874.663	1.11726	1.64551	4.65385	0.689108	0.137296	0.464105	1.56e-06	7	824	c
542	562	81	12.9366	1.68709	8.48787	16.073	52.2357	265.263	31.4354	0.655797	0.952901	0.052915	0.91564	0.839563	3.85357	0.698377	33.5251	1061.98	1.09861	1.38207	0.91564	0.427538	0.325653	0.644871	0.0351998	2.3456	0.601105	3.94012	0.545304	33.2127	1042.46	1.07168	1.53663	2.3456	0.586781	0.137425	0.450424	7.65e-07	3	1365	c
543	235	53	8.52505	2.32908	3.54657	12.4746	132.665	257.711	25.2791	0.852777	0.385128	0.0697756	0.833333	0.794055	3.0232	0.689716	34.8333	1152.07	0.998264	1.25137	0.833333	0.404777	0.308455	0.60533	0.0462908	2.48223	0.450024	3.25667	0.516005	34.7665	1147.38	0.99026	1.42183	2.48223	0.586327	0.09045	0.354991	1.19e-06	5	336	c
544	95	32	5.18904	1.09268	3.18765	7.10448	513.321	255.154	14.2558	0.776134	-0.702735	0.113232	0.559375	0.673237	1.85594	0.739062	36.8031	1298.28	0.811235	0.993112	0.559375	0.331261	0.242662	0.489767	0.0812067	1.48529	0.222329	1.95496	0.557353	36.75	1297.59	0.760323	1.11567	1.48529	0.465004	0.0603865	0.259058	1.62e-06	6	596	c
545	467	87	12.5064	4.57525	2.39544	19.6808	817.906	264.084	41.052	0.906761	-0.649051	0.0413537	1.70496	0.748772	4.39325	0.610352	31.2525	919.015	1.13359	1.52813	1.70496	0.533105	0.227845	0.570029	0.0310111	3.76842	0.405808	4.17105	0.471053	31.0053	904.905	1.07218	1.62445	3.76842	0.664865	0.0796803	0.355128	1.38e-06	6	1991	o
546	182	50	7.22812	1.60643	3.00892	9.72078	500.181	260.09	18.8258	0.648817	-0.987988	0.115566	0.557994	0.781719	2.27815	0.764263	36.9843	1307.65	0.885965	1.07204	0.557994	0.353369	0.307541	0.568046	0.082368	1.54478	0.465688	2.44558	0.621642	36.7687	1292.04	0.882745	1.23131	1.54478	0.517405	0.107929	0.362014	1.63e-06	8	596	c
547	545	91	13.6405	4.41753	5.34353	21.5953	646.202	272.904	43.4562	0.903295	1.07408	0.0390358	1.40594	0.862409	6.10912	0.633665	30.9158	902.522	1.19225	1.54083	1.40594	0.498414	0.319994	0.666326	0.0268392	3.80828	0.614245	5.93613	0.479244	30.5054	876.874	1.1637	1.69913	3.80828	0.673037	0.135681	0.46809	1.5e-06	7	1249	c
548	487	82	13.4101	4.6837	5.61678	21.0895	680.572	276.585	44.0628	0.937185	1.01605	0.0437414	1.72626	0.818216	5.74813	0.609056	29.8229	838.343	1.16843	1.52551	1.72626	0.53679	0.298	0.643321	0.0294513	4.59189	0.52508	5.83438	0.446433	29.685	829.37	1.14334	1.67237	4.59189	0.704779	0.116382	0.432091	1.48e-06	7	573	c
549	526	109	13.5213	5.83187	0.51507	23.6018	747.113	288.15	48.3013	0.918782	-1.3618	0.0389866	1.51985	0.754855	4.09991	0.601017	32.7247	1009.79	1.11917	1.50345	1.51985	0.505302	0.229483	0.568123	0.0298436	3.63765	0.391931	3.99115	0.463555	32.5553	1000.18	1.06153	1.61266	3.63765	0.66249	0.0658622	0.322512	1.42e-06	5	1168	o
550	729	91	14.919	2.15855	10.266	18.2545	317.148	280.708	37.4774	0.706536	-0.979394	0.0873087	0.660261	0.87537	3.64889	0.761522	32.0997	975.157	1.03168	1.22924	0.660261	0.384658	0.417	0.690443	0.0630524	1.53517	0.694443	3.51209	0.625558	31.8624	959.796	1.01952	1.35692	1.53517	0.514931	0.218006	0.531524	1.35e-06	2	832	c
551	359	65	10.38	1.54028	7.85291	13.6125	431.152	280.741	26.2907	0.711684	-1.1667	0.0368958	1.62293	0.834479	5.90248	0.629601	30.9261	902.322	1.18833	1.5584	1.62293	0.522119	0.290715	0.641449	0.0256568	4.47682	0.567519	6.17575	0.476953	30.5629	880.898	1.1576	1.6894	4.47682	0.701749	0.153338	0.494609	1.58e-06	8	824	c
552	389	69	11.3622	3.18038	5.87577	16.786	628.263	282.514	34.5956	0.884087	0.895736	0.0535769	1.41271	0.820063	4.92558	0.629576	31.72	950.658	1.11983	1.46086	1.41271	0.500443	0.282971	0.618183	0.0437258	3.67791	0.507726	4.73564	0.484777	31.4387	933.625	1.06827	1.55201	3.67791	0.665303	0.0997923	0.387839	1.52e-06	4	1249	c
553	612	97	14.3817	4.51986	5.50315	22.2853	475.893	288.466	44.1075	0.865326	-0.494833	0.0432604	1.09714	0.906702	6.8798	0.671788	32.0281	973.002	1.19665	1.48816	1.09714	0.460563	0.383873	0.711938	0.0305131	2.99424	0.747852	6.93747	0.516054	31.6123	946.268	1.19005	1.64142	2.99424	0.625001	0.203257	0.556968	1.64e-06	8	765	c
554	208	52	7.8149	1.64922	4.92206	10.7469	844.106	280.954	21.4036	0.718626	0.150798	0.022694	2.6752	0.812373	8.12904	0.517404	30.3005	869.258	1.2589	1.72171	2.6752	0.606567	0.259522	0.633697	0.019594	7.56707	0.476952	8.23363	0.347246	29.9329	846.234	1.21245	1.77461	7.56707	0.794982	0.144371	0.491213	1.35e-06	6	822	o
555	79	28	4.65474	0.921237	2.90056	6.16317	512.133	280.639	12.5612	0.7318	-0.486907	0.242044	0.390152	0.453927	1.35723	0.804924	38.3523	1425.95	0.604284	0.721731	0.390152	0.290463	0.144496	0.326069	0.190358	0.744681	0.0405366	1.38807	0.678723	38.1489	1413.69	0.560589	0.803229	0.744681	0.356273	0.0242182	0.139637	1.63e-06	7	741	c
556	181	41	7.21536	1.00703	5.60031	9.08081	869.601	282.623	19.1308	0.699987	0.306445	0.024975	4.13405	0.770064	9.98959	0.452657	27.5208	720.665	1.27502	1.77149	4.13405	0.686258	0.231898	0.609645	0.0238788	11.0411	0.377155	9.86344	0.355474	27.1096	694.534	1.22289	1.76257	11.0411	0.869493	0.150508	0.49939	1.33e-06	4	226	o
557	377	70	10.8782	3.15396	4.15466	16.2877	164.619	290.262	31.5145	0.813032	-1.03489	0.0517161	1.13831	0.804925	3.91761	0.673434	33.0094	1028.27	1.1074	1.41011	1.13831	0.46023	0.310884	0.636335	0.0410006	2.7707	0.501798	3.7807	0.522803	32.7643	1013.57	1.05921	1.51785	2.7707	0.608953	0.140717	0.453066	1.31e-06	8	1433	c
558	285	56	9.23455	1.69543	6.85112	12.5375	389.992	288.467	24.9901	0.772603	-1.33682	0.0428247	1.46929	0.835892	5.4766	0.602783	31.2044	919.176	1.15879	1.5071	1.46929	0.497738	0.313936	0.655356	0.0306694	4.42387	0.531585	5.72217	0.444684	31.0658	910.531	1.13149	1.65316	4.42387	0.698463	0.132471	0.457228	1.49e-06	7	352	c
559	419	74	11.2148	3.26821	3.27245	16.3329	991.127	291.749	33.3899	0.843288	0.169724	0.155708	0.400259	0.724368	1.72608	0.806088	29.2215	810.65	0.793598	0.920928	0.400259	0.301309	0.303618	0.529933	0.136318	0.669516	0.473546	1.63587	0.716524	29.0798	804.676	0.746016	0.964426	0.669516	0.362446	0.131757	0.356629	9.97e-07	5	6223	c
560	337	73	10.3986	3.40421	5.3244	16.4018	267.537	298.183	33.678	0.919024	1.545	0.138771	0.490612	0.701238	1.82108	0.788	36.9624	1309.73	0.810874	0.981032	0.490612	0.337544	0.261899	0.505915	0.101224	1.03285	0.394626	1.85307	0.663139	36.7993	1299.06	0.789763	1.105	1.03285	0.439956	0.0762136	0.289532	1.38e-06	5	471	c
561	339	63	9.90883	1.65203	5.70215	13.2338	849.045	297.973	24.4223	0.579733	-0.527731	0.0512298	1.31406	0.782361	4.01889	0.614779	32.4691	994.869	1.09859	1.43727	1.31406	0.477141	0.264467	0.595563	0.0437309	3.78214	0.37768	4.03875	0.458773	32.1536	977.304	1.02592	1.49806	3.78214	0.665027	0.0871845	0.357276	1.34e-06	5	822	o
562	81	29	4.82954	1.45405	2.20717	7.11549	495.989	298.881	14.9516	0.864885	-0.596887	0.285451	0.394052	0.396861	1.32667	0.816357	38.2156	1418.1	0.570123	0.701863	0.394052	0.305528	0.114013	0.285233	0.376654	0.413043	0.141032	1.24043	0.819565	37.8043	1394.96	0.462565	0.608001	0.413043	0.31591	0.0446211	0.165431	1.64e-06	7	741	c
563	129	38	6.23173	1.59815	3.78444	8.88855	511.221	302.994	18.2239	0.84284	-0.645991	0.107405	0.651007	0.639928	1.90399	0.722819	36.5302	1278.68	0.813002	1.02079	0.651007	0.362124	0.211285	0.462903	0.09519	1.20225	0.273968	1.82796	0.601124	36.191	1258.36	0.747422	1.06127	1.20225	0.43392	0.0681346	0.268563	1.63e-06	7	741	c
564	183	52	7.70777	2.78568	2.55769	12.2695	247.765	308.982	26.1784	0.92401	1.45146	0.0437908	2.24143	0.674059	4.4384	0.568014	31.9829	964.598	1.11077	1.52649	2.24143	0.582769	0.193514	0.528154	0.0415592	6.11268	0.210717	4.8723	0.441662	31.6197	944.642	1.0376	1.55539	6.11268	0.755575	0.0748789	0.337584	1.4e-06	6	1405	c
565	675	83	14.2644	1.19039	11.2196	16.3667	960.23	310.665	32.9098	0.532716	0.798606	0.0839971	0.896282	0.841498	3.82736	0.723232	31.1624	916.828	1.05571	1.29289	0.896282	0.433942	0.361559	0.659408	0.0605889	2.08	0.590045	3.53686	0.601864	30.9233	901.832	1.02744	1.41358	2.08	0.568039	0.166827	0.476289	1.11e-06	4	784	c
566	163	50	7.34241	3.06233	0.480833	11.8487	711.985	308.748	26.3922	0.93763	0.766028	0.0448103	1.37143	0.71412	3.39861	0.607857	34.3357	1115.85	1.05472	1.42261	1.37143	0.483302	0.204089	0.52561	0.0314311	3.50794	0.362879	3.75296	0.44629	34.5079	1128.47	1.02706	1.56503	3.50794	0.639204	0.0676197	0.322094	1.43e-06	7	318	c
567	309	57	9.58037	1.65373	6.78292	12.3987	231.059	311.471	25.0689	0.751983	1.20917	0.0438972	1.74758	0.741757	4.38359	0.617739	31.1689	914.302	1.12697	1.5162	1.74758	0.533567	0.226946	0.56717	0.0319037	3.78626	0.441088	4.38717	0.462915	31.0305	906.212	1.08976	1.62391	3.78626	0.663275	0.0992934	0.395037	1.41e-06	7	368	c
568	448	77	11.7774	2.73757	6.82472	15.9583	164.864	313.527	33.5952	0.829863	0.36401	0.0416282	1.22859	0.87212	5.80368	0.64047	31.6894	948.931	1.178	1.49312	1.22859	0.474048	0.341592	0.677798	0.0301048	3.39418	0.619786	5.46351	0.487008	31.2778	922.698	1.14079	1.64223	3.39418	0.651888	0.138911	0.466277	1.32e-06	8	1433	c
569	467	114	12.9289	5.26378	2.43405	23.801	397.623	326.175	45.9603	0.932117	1.56415	0.0418948	1.6806	0.813207	5.49855	0.618167	32.1857	979.115	1.15663	1.52454	1.6806	0.53562	0.286179	0.631657	0.0281406	5.03684	0.470313	5.75454	0.462274	31.8842	959.024	1.14266	1.68285	5.03684	0.714693	0.119173	0.438237	1.49e-06	5	2787	c
570	310	63	9.69075	2.49375	4.75568	14.0135	367.82	317.948	28.2695	0.847107	-1.43488	0.0806657	0.778269	0.796669	2.9138	0.710512	34.8595	1154.66	0.980649	1.21856	0.778269	0.401255	0.299433	0.590695	0.0548845	2.13755	0.499224	3.13423	0.544741	34.8216	1152.39	0.969017	1.37209	2.13755	0.563952	0.0999025	0.366546	1.43e-06	6	2057	c
571	574	88	14.5841	4.83184	7.19075	22.5036	418.152	322.176	45.5992	0.928282	-0.948136	0.0730287	1.36376	0.798025	4.37608	0.689893	30.0473	850.968	1.08477	1.38764	1.36376	0.493925	0.291158	0.613827	0.0577872	3.00206	0.51027	4.06502	0.56565	29.7691	834.979	1.03372	1.47718	3.00206	0.622486	0.116889	0.40933	1.53e-06	6	2787	c
572	379	71	10.4262	2.46171	3.51571	13.113	748.49	320.933	27.9892	0.677132	-0.669887	0.029225	2.18719	0.854211	8.50118	0.554148	28.6278	776.116	1.27274	1.68185	2.18719	0.575961	0.306299	0.675078	0.0196658	6.46933	0.585642	8.80644	0.393939	28.3773	760.382	1.25487	1.84197	6.46933	0.762532	0.138278	0.489266	1.38e-06	4	1168	o
573	580	85	13.7412	3.68117	6.92602	20.0958	443.227	322.971	40.4674	0.868597	-0.885123	0.0762104	1.24101	0.865837	5.62503	0.697836	30.8382	899.776	1.13106	1.42656	1.24101	0.478472	0.369788	0.690278	0.0651795	3.00596	0.642319	5.20202	0.558825	30.4493	874.775	1.10696	1.53826	3.00596	0.634524	0.178506	0.510188	1.58e-06	6	2787	c
574	96	31	5.11998	1.04635	3.23997	6.80943	858.793	311.904	14.6746	0.785893	0.0100245	0.0324862	3.07927	0.666376	5.61488	0.474426	31.7988	955.388	1.13923	1.57889	3.07927	0.619095	0.196482	0.539523	0.0340265	7.24638	0.168194	5.35581	0.321593	31.6232	945.914	1.03337	1.58441	7.24638	0.742119	0.123147	0.433274	1.33e-06	4	822	o
575	408	64	11.1324	1.952	8.25252	14.8106	652.146	320.32	29.2332	0.753403	1.01961	0.0450434	1.78524	0.758253	4.69239	0.619595	30.639	882.994	1.14307	1.52743	1.78524	0.534898	0.255298	0.600386	0.0325372	4.89014	0.357749	4.80703	0.460854	30.5465	877.561	1.09783	1.67455	4.89014	0.700673	0.0936652	0.389522	1.46e-06	7	524	c
576	197	58	8.49379	3.32947	1.76006	14.573	1020.56	320.584	29.7504	0.936903	0.694967	0.0760769	0.839941	0.799328	3.09282	0.70514	27.8003	726.661	0.983695	1.24724	0.839941	0.415251	0.283404	0.581002	0.0527111	2.22667	0.536489	3.40196	0.576513	27.7867	725.672	0.985723	1.3644	2.22667	0.572385	0.145955	0.439673	8.15e-07	4	6223	c
577	726	91	14.9228	2.77564	10.3484	21.2928	600.34	336.728	38.8603	0.766461	1.4028	0.0979162	0.495808	0.835547	2.50745	0.794969	25.914	628.933	0.946009	1.11408	0.495808	0.341444	0.379903	0.637932	0.0712192	1.04821	0.63749	2.44577	0.669765	25.8009	622.959	0.936829	1.24734	1.04821	0.44731	0.178823	0.466111	1.49e-06	3	1071	c
578	408	68	10.992	0.868187	9.11587	13.0557	258.208	329.823	24.2241	0.318989	0.617934	0.0460602	1.32365	0.829401	4.87942	0.638806	30.5918	880.864	1.15254	1.46769	1.32365	0.490246	0.316564	0.651302	0.0290825	3.69774	0.532489	4.95471	0.468127	30.4322	871.185	1.12241	1.63976	3.69774	0.658331	0.136428	0.461996	1.41e-06	5	1405	c
579	211	47	7.88982	1.69296	4.60244	10.1422	513.088	327.796	22.455	0.808292	-0.548035	0.032393	2.48221	0.781012	6.66746	0.542453	29.8314	839.693	1.20435	1.65804	2.48221	0.591659	0.230787	0.592587	0.032443	5.40964	0.51171	6.53937	0.405737	29.4096	815.21	1.15257	1.62652	5.40964	0.730355	0.119681	0.432463	1.61e-06	5	296	c
580	316	69	10.1209	3.53779	3.95734	15.7722	149.513	329.008	34.4613	0.922986	0.0548837	0.032591	1.95379	0.849053	7.47176	0.578176	30.6425	889.37	1.22423	1.61598	1.95379	0.556107	0.301171	0.660416	0.0247633	5.6717	0.570034	7.59552	0.415935	30.5019	879.618	1.19477	1.73658	5.6717	0.731527	0.14023	0.479998	1.26e-06	8	1433	c
581	152	49	6.6105	1.62338	3.00215	9.73698	554.609	335.245	16.4952	0.604192	-1.34974	0.139764	0.552987	0.60018	1.69154	0.760501	37.289	1336.03	0.767589	0.951448	0.552987	0.347473	0.192871	0.428715	0.171713	0.705882	0.257582	1.47539	0.729412	37.0196	1324.3	0.64512	0.876099	0.705882	0.387878	0.0530675	0.215956	1.56e-06	3	1648	c
582	126	36	5.89463	0.767944	4.45312	7.67733	908.458	336.171	14.971	0.614131	-1.40659	0.0250719	2.62812	0.751608	6.29026	0.490103	32.2608	983.38	1.19879	1.64322	2.62812	0.585616	0.239597	0.600538	0.0273438	6.94792	0.387157	6.66859	0.337637	32.1146	974.364	1.15271	1.63075	6.94792	0.753097	0.139966	0.466506	1.25e-06	3	198	o
583	350	70	10.8571	3.45667	5.34286	17.6045	646.613	347.381	34.5802	0.909863	1.17328	0.0506893	1.49765	0.81838	5.12305	0.660886	31.5196	937.159	1.1524	1.50181	1.49765	0.513172	0.31046	0.651276	0.0405113	3.8	0.542822	5.15593	0.54291	31.3379	925.496	1.12746	1.60756	3.8	0.66516	0.148117	0.476181	1.41e-06	4	449	c
584	267	53	9.01683	1.706	6.56848	12.1428	1031.61	340.398	24.2275	0.791613	0.889723	0.113343	0.606591	0.723714	2.09776	0.758496	27.4923	712.232	0.875603	1.07098	0.606591	0.366303	0.268445	0.531567	0.0796488	1.21364	0.471228	2.1476	0.622273	27.4773	712.365	0.850436	1.18073	1.21364	0.447368	0.114855	0.366065	7.34e-07	2	6223	c
585	508	74	12.4764	2.29061	8.31301	16.3103	126.806	343.765	34.0826	0.782303	0.404078	0.0294265	1.64301	0.894784	8.80781	0.617536	28.3612	760.975	1.31704	1.68192	1.64301	0.52982	0.371779	0.732187	0.0220448	4.45786	0.699228	8.4107	0.469283	27.8292	730.167	1.27766	1.81955	4.45786	0.705404	0.201948	0.579226	1.15e-06	5	575	c
586	228	59	8.81682	3.13425	3.34959	13.4328	801.003	348.963	29.9688	0.932514	1.25154	0.0273952	2.41235	0.744752	5.7255	0.524148	31.5481	937.146	1.20583	1.6676	2.41235	0.583539	0.216573	0.577089	0.023902	6.40571	0.301671	5.58646	0.357962	31.16	913.043	1.14162	1.72861	6.40571	0.750563	0.0878704	0.38327	1.31e-06	4	543	o
587	727	84	14.7969	1.05448	12.4015	16.7755	343.531	352.686	34.1176	0.532885	-0.790181	0.0728869	0.959768	0.854279	4.29316	0.702202	30.319	865.417	1.1093	1.35421	0.959768	0.442922	0.372177	0.679445	0.0533029	2.4419	0.605417	4.09427	0.558146	30.0719	850.559	1.07836	1.47374	2.4419	0.593556	0.163677	0.480667	1.4e-06	4	2057	c
588	479	78	12.6482	3.58195	6.90875	18.7995	456.541	347.977	38.2862	0.895459	-0.485397	0.0464044	1.05621	0.85656	4.68171	0.6784	32.8359	1018.07	1.14359	1.44374	1.05621	0.452292	0.335444	0.664197	0.0312759	3.02651	0.588817	4.68024	0.504544	32.5783	1001.75	1.11323	1.60533	3.02651	0.624412	0.134038	0.453837	1.57e-06	4	2787	c
589	603	92	13.7419	2.70181	8.54727	18.7527	253.236	352.27	32.2818	0.380638	-1.27266	0.0330192	1.502	0.863221	6.49061	0.620441	29.6417	826.508	1.25077	1.61498	1.502	0.507703	0.334436	0.690797	0.0212585	4.12098	0.630938	6.58305	0.450914	29.3233	807.626	1.22672	1.77917	4.12098	0.683052	0.147558	0.496803	1.42e-06	4	1405	c
590	514	76	12.8867	3.47333	6.36396	18.6682	683.043	352.45	38.4713	0.870483	0.560232	0.0806251	1.65641	0.809066	5.33765	0.645641	28.621	772.677	1.10764	1.43869	1.65641	0.533095	0.288858	0.620284	0.0616113	3.94407	0.527704	5.17542	0.540157	28.3289	755.538	1.07486	1.52467	3.94407	0.6774	0.117346	0.416048	1.35e-06	5	1289	c
591	601	84	13.543	2.33757	9.64198	19.1564	551.389	358.861	35.5579	0.732126	-0.995986	0.0371181	1.30923	0.892678	7.09954	0.646955	28.8256	783.668	1.24705	1.57323	1.30923	0.486135	0.375692	0.719033	0.0255766	3.54004	0.708554	7.07322	0.502602	28.5605	768.144	1.22206	1.72934	3.54004	0.665081	0.208574	0.575743	1.53e-06	2	1648	c
592	92	31	5.13304	1.42721	2.52129	7.18885	753.549	347.744	16.0602	0.870646	1.10963	0.0257286	3.20257	0.632048	5.35189	0.438803	32.5016	997.351	1.14646	1.65828	3.20257	0.615049	0.15268	0.489645	0.0295892	6.72881	0.0387212	4.49993	0.310382	32.0169	967.931	1.02242	1.57356	6.72881	0.719558	0.0669667	0.321393	1.32e-06	3	137	o
593	460	78	12.0695	3.82271	4.10539	17.0394	491.943	355.431	37.8684	0.879225	0.484547	0.0458219	1.69923	0.809902	5.46935	0.609259	30.4656	875.224	1.15608	1.51852	1.69923	0.530145	0.275516	0.62003	0.0362929	3.89378	0.526017	5.10751	0.47485	30.0026	847.565	1.10572	1.60578	3.89378	0.671875	0.114836	0.421529	1.58e-06	3	590	c
594	292	65	9.48204	2.33148	4.96075	13.4185	163.025	351.029	26.8057	0.828126	0.00613436	0.0272744	2.2656	0.843861	8.25505	0.570144	29.7344	837.527	1.26035	1.68769	2.2656	0.584953	0.290571	0.660752	0.0228562	6.16102	0.562387	8.03934	0.422044	29.1102	800.178	1.21426	1.76901	6.16102	0.762147	0.157265	0.510511	1.31e-06	7	2945	c
595	265	72	9.38314	2.75314	3.51018	14.8367	890.169	354.702	27.4385	0.827089	0.509316	0.0290034	1.91123	0.802048	5.8275	0.579677	32.6727	1008.52	1.19068	1.61953	1.91123	0.544233	0.246651	0.60495	0.0233204	4.7451	0.475578	5.52413	0.43064	32.3725	988.816	1.14012	1.71632	4.7451	0.705372	0.100563	0.407651	1.27e-06	3	1473	o
596	217	52	8.39374	2.69265	3.75276	12.7885	961.167	359.698	27.2407	0.905879	0.585466	0.0242498	3.12016	0.778771	8.05187	0.487767	29.624	829.51	1.26168	1.74578	3.12016	0.630844	0.235972	0.610867	0.0169112	8.60947	0.400865	8.18491	0.310389	29.3077	808.305	1.23323	1.8761	8.60947	0.801878	0.0942121	0.411463	1.08e-06	2	273	o
597	78	26	4.5595	0.499386	3.74679	5.61933	838.206	361.741	11.5771	0.601387	1.25675	0.0262641	2.99242	0.689686	5.82161	0.458601	32.8712	1022.07	1.15718	1.63218	2.99242	0.607772	0.180388	0.525804	0.0337359	7.10204	0.223214	5.57143	0.319716	32	967.896	1.06923	1.57024	7.10204	0.721189	0.131131	0.444709	1.29e-06	3	169	o
598	540	104	14.5359	6.20187	4.46188	24.8156	149.898	364.6	54.0993	0.963883	0.138454	0.0415965	2.36739	0.791348	6.67305	0.609782	29.4736	819.364	1.20629	1.60281	2.36739	0.590703	0.279178	0.636802	0.0282092	5.99777	0.454012	6.49258	0.47487	28.9733	788.371	1.18122	1.73135	5.99777	0.743862	0.110941	0.428969	1.26e-06	5	2945	c
599	150	45	6.95292	2.32084	3.32391	10.7592	809.43	370.366	22.7869	0.916738	1.21984	0.0311372	2.14231	0.731385	4.98769	0.537868	32.3962	989.701	1.15687	1.605	2.14231	0.563628	0.204654	0.553567	0.030221	5.58879	0.333951	5.19548	0.415848	31.9439	963.266	1.08825	1.61977	5.58879	0.739913	0.0800023	0.355346	1.27e-06	3	543	o
600	455	76	11.7944	1.90812	8.49542	16.2258	909.335	372.064	29.5707	0.681696	0.399912	0.0700844	1.60355	0.870977	7.2142	0.644659	27.5988	721.576	1.17303	1.49433	1.60355	0.528804	0.348159	0.683642	0.0469087	4.38168	0.632888	6.96777	0.494881	27.3333	705.118	1.14882	1.61831	4.38168	0.699062	0.174796	0.516263	1.23e-06	3	1473	c
601	554	76	12.8368	1.2222	9.62102	15.3275	667.994	374.348	29.4455	0.503442	0.279852	0.0599877	0.774256	0.853005	3.63361	0.714313	33.7646	1078.58	1.07182	1.3197	0.774256	0.401216	0.347399	0.652559	0.0438474	1.99385	0.59042	3.43402	0.557354	33.5881	1068.09	1.02512	1.45903	1.99385	0.549226	0.136416	0.438557	1.28e-06	3	1289	o
602	168	47	7.03551	1.58709	4.79404	10.3268	1004.83	373.666	19.4416	0.799512	-1.47077	0.0326788	2.07483	0.725832	4.78387	0.535776	33.6905	1072.66	1.13896	1.58475	2.07483	0.543719	0.189235	0.530999	0.025503	5.16923	0.311573	4.75438	0.366636	34.1692	1104.53	1.08329	1.65076	5.16923	0.697162	0.0847618	0.368701	8.52e-07	2	605	o
603	517	77	12.4443	1.43636	9.59636	15.8536	560.108	380.596	28.915	0.425984	-1.14467	0.03512	1.74093	0.924544	12.5361	0.627954	27.2912	719.071	1.31683	1.67532	1.74093	0.532589	0.386974	0.74323	0.0225743	5.11359	0.768463	12.0427	0.45576	26.686	683.036	1.30924	1.8278	5.11359	0.716929	0.217508	0.599886	1.47e-06	4	1648	c
604	612	89	13.7339	2.89559	9.19923	19.2499	476.847	379.167	38.0015	0.815928	-0.206245	0.0646063	0.889325	0.85118	3.98791	0.732484	31.8802	958.314	1.10273	1.36223	0.889325	0.427317	0.367841	0.677366	0.0454681	2.02642	0.642702	3.83575	0.600812	31.7245	948.633	1.07626	1.49024	2.02642	0.553021	0.184369	0.511024	1.56e-06	5	1590	c
605	238	66	8.34219	2.25048	3.19007	12.6896	705.489	379.456	20.6144	0.473266	0.654166	0.054991	1.00837	0.812008	3.68196	0.679208	34.1447	1104.44	1.05822	1.35724	1.00837	0.443824	0.295845	0.613002	0.0500126	2.3545	0.504584	3.37628	0.54748	33.9101	1091.61	0.978871	1.40459	2.3545	0.580841	0.109522	0.387547	1.22e-06	3	1048	c
606	458	80	11.9076	3.08457	4.73097	17.0369	588.055	385.914	33.0638	0.767408	-1.06469	0.0471491	1.36976	0.879516	6.68441	0.653469	30.8665	902.401	1.18431	1.49747	1.36976	0.501171	0.362511	0.696212	0.0357985	3.79845	0.666152	6.68889	0.514028	30.4703	877.19	1.17467	1.64016	3.79845	0.678206	0.178772	0.52469	1.39e-06	4	1217	c
607	309	77	10.057	3.2905	3.39448	16.5585	848.349	387.408	30.1844	0.849614	-1.12133	0.0266884	2.26186	0.828643	7.59985	0.558512	29.7162	834.428	1.25064	1.68325	2.26186	0.582663	0.270918	0.640239	0.0212939	5.70356	0.58824	7.92583	0.410807	29.7115	833.575	1.2233	1.74747	5.70356	0.747677	0.149694	0.496277	1.25e-06	3	1597	o
608	578	86	13.5272	3.36887	6.73272	19.6399	871.383	386.718	38.1072	0.802594	0.440461	0.0510227	1.35926	0.854349	5.66615	0.655959	28.6954	774.801	1.17274	1.49886	1.35926	0.493836	0.328279	0.667034	0.0380218	3.72079	0.589226	5.529	0.513515	28.5366	764.898	1.14132	1.63347	3.72079	0.658258	0.146284	0.476712	1.26e-06	3	1597	c
609	536	83	12.7667	1.49458	10.4244	16.4014	609.626	389.176	30.3862	0.568405	0.966188	0.0757641	1.47153	0.887925	7.56495	0.675741	28.3896	766.318	1.15858	1.45208	1.47153	0.513248	0.379265	0.702267	0.057186	3.85065	0.671297	6.85734	0.532138	27.8896	735.004	1.14218	1.56407	3.85065	0.674667	0.202273	0.544698	1.33e-06	3	1217	c
610	292	71	9.13019	2.11362	3.50498	12.6776	137.498	385.164	21.606	0.447294	-1.14654	0.0481128	1.15149	0.866791	5.32209	0.681704	31.2128	920.359	1.14256	1.46285	1.15149	0.473835	0.351023	0.680853	0.0338665	3.26556	0.632124	5.43839	0.535236	31.0996	912.507	1.13262	1.58952	3.26556	0.652119	0.189691	0.532269	1.21e-06	4	2945	c
611	328	68	9.61158	1.79764	4.73915	13.0414	496.056	390.358	24.4118	0.615685	-1.17237	0.047466	2.0176	0.838684	7.25357	0.599876	29.7477	839.208	1.17829	1.55668	2.0176	0.558988	0.292682	0.6431	0.0374146	6.09474	0.568887	8.0686	0.430141	29.6877	836.128	1.15794	1.68961	6.09474	0.752907	0.135011	0.465839	1.55e-06	4	1590	c
612	345	71	10.2427	2.67378	4.92855	15.7465	161.967	387.421	28.0852	0.773946	0.432686	0.0752765	0.748804	0.774126	2.65757	0.709809	34.2703	1114.21	0.978791	1.22645	0.748804	0.390838	0.277954	0.571786	0.0550463	2.01064	0.389021	2.64542	0.549124	34.1879	1110.46	0.933088	1.3834	2.01064	0.545564	0.0722398	0.313827	1.32e-06	5	2945	c
613	494	76	12.7624	3.48962	5.96228	18.4011	195.652	396.811	38.9121	0.879581	0.569433	0.0400507	1.60609	0.863085	6.86531	0.634855	27.9652	736.603	1.23041	1.58212	1.60609	0.525199	0.344713	0.6947	0.0266055	4.10165	0.633352	6.59344	0.481948	27.539	711.718	1.20564	1.72489	4.10165	0.67879	0.176809	0.533237	1.42e-06	6	621	c
614	441	87	12.7087	4.55054	5.80915	20.6992	709.598	396.015	42.2758	0.94005	0.48305	0.0714964	0.795285	0.804406	3.033	0.732543	35.1092	1170.33	1.00652	1.25951	0.795285	0.412476	0.308815	0.60721	0.0494749	1.78249	0.563301	3.04086	0.593595	35.0198	1164.05	0.995309	1.39211	1.78249	0.538238	0.130367	0.420069	1.15e-06	5	1048	c
615	269	54	8.93886	1.44116	6.33198	12.044	516.926	395.451	23.372	0.730765	-1.18049	0.0437939	1.34623	0.833944	5.05354	0.63303	31.7413	949.509	1.16945	1.50904	1.34623	0.492929	0.320334	0.661532	0.0270367	3.26244	0.566417	4.76219	0.464456	31.2624	919.937	1.12691	1.65138	3.26244	0.623777	0.135554	0.462029	1.52e-06	5	319	c
616	488	78	12.9829	3.98426	6.20127	19.6767	923.224	402.816	40.743	0.903402	0.881745	0.0338761	1.8521	0.872613	8.26957	0.60443	28.0342	743.939	1.26272	1.65053	1.8521	0.553371	0.336985	0.698379	0.0218587	5.26087	0.623662	7.98956	0.451307	27.628	718.829	1.24371	1.81932	5.26087	0.736364	0.148785	0.50355	1.16e-06	4	1473	c
617	356	85	10.1568	3.68919	0.598961	16.2349	435.989	401.122	31.4916	0.801472	0.260874	0.0900011	0.761532	0.711815	2.32125	0.719514	37.4871	1342.26	0.912035	1.15867	0.761532	0.397853	0.232899	0.513016	0.0710173	1.8705	0.30303	2.34188	0.604942	37.223	1326.78	0.846014	1.2416	1.8705	0.552728	0.0740778	0.301816	1.53e-06	7	587	c
618	472	71	12.0293	1.98976	7.78314	16.0444	475.16	399.944	30.4281	0.698171	0.0834056	0.0469269	1.20978	0.861694	5.37356	0.687972	31.5281	937.391	1.17841	1.48183	1.20978	0.477447	0.361015	0.692396	0.031868	3.04975	0.649527	5.35091	0.537114	31.1194	912.796	1.14539	1.61966	3.04975	0.6223	0.198356	0.547701	1.55e-06	7	1590	c
619	277	53	8.98034	1.50139	6.61939	11.3431	270.427	405.913	24.3349	0.755602	-1.46058	0.0353386	2.52663	0.81364	7.77889	0.573409	29.2643	809.809	1.24253	1.65714	2.52663	0.605124	0.291404	0.657104	0.0308011	6.89407	0.493761	7.8091	0.428666	28.9703	791.672	1.19752	1.7347	6.89407	0.775303	0.13832	0.476684	1.49e-06	3	898	c
620	390	73	11.2355	3.43717	4.64828	17.1461	541.701	412.282	34.723	0.878345	1.40663	0.0449847	1.9205	0.80764	5.99195	0.60152	29.1674	801.538	1.17646	1.55056	1.9205	0.555085	0.281344	0.630947	0.0355819	4.73313	0.509054	5.82042	0.477135	28.8067	780.215	1.13607	1.64011	4.73313	0.712295	0.126808	0.446242	1.44e-06	3	466	c
621	87	33	5.19832	1.86861	2.20901	8.07734	966.792	406.838	17.3793	0.916198	0.963631	0.129582	0.867596	0.359252	1.67702	0.691638	36.0523	1248.92	0.738196	1.01536	0.867596	0.415016	0.0782839	0.281771	0.1604	0.94	-0.0465375	1.4491	0.65	36.06	1260.12	0.573875	0.861648	0.94	0.404238	0.0141042	0.110293	1.01e-06	4	337	o
622	318	61	9.84122	2.33019	6.71181	13.8185	151.566	410.92	29.0203	0.848669	0.222184	0.0416757	2.10892	0.834035	7.3535	0.599541	28.169	750.559	1.20131	1.59347	2.10892	0.571464	0.295642	0.651669	0.0286906	5.46388	0.547746	7.04072	0.45643	27.73	723.584	1.18037	1.72252	5.46388	0.744625	0.131512	0.464023	1.29e-06	6	2945	c
623	328	64	9.81162	1.97867	4.51781	12.6221	878.944	411.271	26.1096	0.720388	0.0770635	0.0446578	0.975853	0.861798	4.53053	0.666944	32.5795	1001	1.14936	1.45014	0.975853	0.430448	0.344723	0.673336	0.0306012	2.71841	0.628386	4.65758	0.4895	32.278	981.898	1.13338	1.61267	2.71841	0.601315	0.146229	0.473956	1.21e-06	7	1597	c
624	423	81	11.4013	3.25287	5.42946	17.0941	75.744	417.988	34.5085	0.861821	0.691029	0.0522009	0.998071	0.836473	4.0517	0.671511	32.0643	968.892	1.11784	1.40425	0.998071	0.440128	0.340176	0.661536	0.033659	2.69638	0.579509	4.20623	0.503195	31.7214	947.669	1.10217	1.58443	2.69638	0.602169	0.136957	0.45586	8.88e-07	2	537	c
625	665	88	14.6932	3.27367	9.3051	21.2484	910.042	424.109	40.654	0.831363	1.05628	0.0376363	1.70818	0.822373	5.80834	0.606387	28.3988	757.837	1.19013	1.56769	1.70818	0.532212	0.285625	0.637878	0.0258798	4.14435	0.521221	5.32803	0.454196	28.0783	738.771	1.14123	1.69731	4.14435	0.683302	0.0973676	0.399335	1.15e-06	5	750	c
626	707	86	14.9226	2.67308	9.42455	19.5831	423.745	431.818	39.1225	0.782221	-0.778036	0.0734934	1.00785	0.838038	4.11139	0.704037	32.3452	990.38	1.05712	1.33574	1.00785	0.452758	0.323786	0.634917	0.0541469	2.50481	0.561866	3.8585	0.555861	32.1074	975.148	1.02331	1.45056	2.50481	0.596784	0.124084	0.417862	1.57e-06	7	3090	c
627	524	83	13.0196	3.50666	7.30169	19.8331	19.0061	436.92	38.7347	0.865536	-1.4796	0.0447905	1.35656	0.856697	5.73318	0.648915	29.8443	838.854	1.18631	1.50447	1.35656	0.495607	0.338689	0.677133	0.0343337	3.14091	0.625918	5.19816	0.517592	29.2091	801.668	1.13746	1.60337	3.14091	0.634624	0.155566	0.486803	5.98e-07	3	630	c
628	100	34	5.42825	1.60216	2.31924	8.17975	779.599	424.706	16.9107	0.867331	1.29198	0.0355467	2.61538	0.602473	4.28956	0.530354	33.3195	1049.64	1.08448	1.5206	2.61538	0.598384	0.161319	0.483935	0.0410204	6.34286	0.11357	4.57776	0.398434	32.9429	1027.77	1.00847	1.53042	6.34286	0.744753	0.055583	0.289445	1.06e-06	2	154	o
629	167	45	6.80606	1.28792	3.36269	8.70867	463.367	428.345	16.0744	0.406434	1.20646	0.246985	0.348639	0.532855	1.37316	0.829762	39.5629	1518.64	0.60792	0.718367	0.348639	0.28621	0.187768	0.371903	0.213652	0.598425	0.143263	1.34925	0.738583	39.4488	1513.14	0.56002	0.758502	0.598425	0.352183	0.0146435	0.105483	1.55e-06	7	3090	c
630	554	89	13.4391	4.12664	6.79991	20.1832	518.994	438.23	41.3454	0.899037	1.46091	0.0663117	1.04644	0.826611	4.01762	0.686885	32.9197	1024.63	1.08244	1.37378	1.04644	0.453991	0.312325	0.631336	0.0431101	2.56432	0.577356	4.03366	0.530328	32.7718	1015.48	1.0557	1.50738	2.56432	0.602176	0.122439	0.422467	1.45e-06	2	632	c
631	306	56	9.55001	1.53162	6.99143	12.3991	704.484	429.653	24.336	0.725803	0.710654	0.0564099	0.953654	0.834632	3.88343	0.709584	33.5383	1062.7	1.1019	1.38417	0.953654	0.433517	0.335677	0.654099	0.0388499	2.52918	0.540438	3.75173	0.561965	33.3541	1051.3	1.06137	1.52955	2.52918	0.596522	0.137715	0.449951	1e-06	3	754	c
632	518	89	13.5949	4.88852	5.14191	21.9238	177.793	436.102	44.788	0.933051	0.415992	0.0403463	1.41784	0.81259	4.78273	0.621228	30.5696	878.521	1.16202	1.51317	1.41784	0.499619	0.291996	0.635545	0.0303012	3.77778	0.506679	4.82892	0.462505	30.3492	865.467	1.12714	1.65162	3.77778	0.669427	0.106135	0.411089	1.43e-06	6	766	c
633	167	44	7.14551	1.84948	3.24714	10.3484	877.289	441.056	20.9712	0.855987	0.892462	0.0928756	0.787776	0.694604	2.28976	0.712054	35.0628	1170.83	0.90942	1.16176	0.787776	0.404623	0.233574	0.51432	0.0877686	1.57031	0.421316	2.3568	0.589844	34.8984	1162.15	0.864781	1.22754	1.57031	0.502345	0.0898375	0.330226	1.13e-06	5	1652	c
634	289	68	10.0967	4.10435	2.75035	16.923	55.7614	447.642	35.6193	0.941271	1.20656	0.0560223	1.25193	0.746169	3.46607	0.643646	32.9759	1027.6	1.05435	1.38738	1.25193	0.480898	0.24119	0.562572	0.0362055	3.33898	0.413198	3.84507	0.488151	32.7542	1014.8	1.02478	1.54636	3.33898	0.650964	0.10955	0.405065	8.37e-07	4	413	c
635	200	48	7.73333	1.71981	4.7157	10.6217	722.257	441.834	21.7327	0.809827	0.562048	0.0631351	1.29272	0.750012	3.58556	0.645288	32.8838	1022.46	1.04957	1.35358	1.29272	0.485848	0.269942	0.586965	0.0441415	3.24516	0.384671	3.63693	0.502242	32.5742	1002.9	1.02106	1.47982	3.24516	0.646692	0.0804591	0.341569	9.54e-07	3	754	c
636	255	54	8.70798	1.55919	6.17936	12.0046	234.765	445.988	23.3265	0.756112	0.964304	0.0419694	1.61489	0.824531	5.60163	0.616273	30.9871	906.26	1.1631	1.52296	1.61489	0.521658	0.279967	0.625223	0.036208	4.60369	0.536844	5.96991	0.47581	30.8802	899.874	1.13798	1.5987	4.60369	0.711547	0.138735	0.460495	1.59e-06	5	476	c
637	462	72	11.6633	1.10347	9.1446	13.6478	895.924	456.716	27.6947	0.511615	0.0884333	0.0491282	1.57898	0.885631	7.90299	0.644707	27.644	723.848	1.22783	1.57036	1.57898	0.521832	0.355436	0.701979	0.0422037	4.26536	0.690876	7.8991	0.503633	27.4939	715.034	1.1936	1.65507	4.26536	0.695621	0.204564	0.56052	1.09e-06	5	1652	c
638	644	91	14.9596	4.71507	7.34484	22.375	223.765	465.506	47.3162	0.917245	0.64392	0.0467382	1.1706	0.874791	5.6746	0.686105	30.2679	863.619	1.18026	1.48811	1.1706	0.472774	0.363856	0.695783	0.0317006	3.00522	0.679672	5.69084	0.54169	30.073	850.894	1.17432	1.6414	3.00522	0.625422	0.191259	0.541559	1.63e-06	7	2309	c
639	641	95	14.5302	4.38926	7.83492	22.7044	559.267	471.991	44.9493	0.901194	1.54927	0.0517438	0.978351	0.867017	4.67848	0.68177	32.3272	986.89	1.1318	1.40759	0.978351	0.434776	0.354386	0.674249	0.0364058	2.61989	0.636351	4.60223	0.519509	32.1012	972.625	1.10389	1.55382	2.61989	0.602776	0.161321	0.488514	1.3e-06	4	776	c
640	729	93	14.9132	2.01774	11.5693	19.3243	414.147	472.201	37.1541	0.695122	-1.0561	0.0525179	1.05045	0.889286	5.74399	0.70926	32.5539	1002.65	1.17365	1.45485	1.05045	0.451985	0.381328	0.704377	0.0339246	2.69632	0.715567	5.73982	0.562749	32.3558	989.377	1.16105	1.62372	2.69632	0.603139	0.200707	0.55126	1.64e-06	6	3090	c
641	458	78	12.4348	3.84379	5.90942	18.5285	199.3	469.695	39.3999	0.910861	0.470574	0.0880092	1.5513	0.791571	4.72141	0.65171	29.5419	826.132	1.03225	1.34331	1.5513	0.522773	0.267945	0.583151	0.0752308	3.9383	0.439458	4.51294	0.518886	29.1671	804.363	0.98466	1.40936	3.9383	0.675597	0.0910344	0.354649	1.58e-06	9	2309	c
642	680	92	14.3475	2.48628	8.56944	18.5302	40.7262	474.282	37.384	0.714348	-0.0562609	0.0427914	1.10109	0.899959	6.50323	0.671826	28.0191	738.854	1.22469	1.51949	1.10109	0.461134	0.392761	0.723976	0.0272481	3.37459	0.700027	6.62481	0.493188	27.7871	725.845	1.20292	1.71108	3.37459	0.650646	0.190125	0.549518	8.14e-07	5	1726	c
643	572	80	13.0841	1.6489	10.3126	16.2903	886.761	479.763	32.6904	0.653362	-0.0631103	0.0463742	1.11913	0.894553	6.30658	0.670367	28.7869	780.893	1.20454	1.49344	1.11913	0.465736	0.392013	0.719174	0.0322926	2.8246	0.706096	5.80531	0.514862	28.3246	753.7	1.17127	1.63196	2.8246	0.612834	0.205419	0.55835	1.04e-06	4	1652	c
644	616	99	13.4603	3.38178	5.27721	19.196	583.224	486.594	36.2099	0.712859	1.54762	0.0454868	0.987336	0.84066	4.0982	0.672908	33.8057	1079.66	1.12147	1.41543	0.987336	0.437549	0.324212	0.649393	0.0327305	2.42075	0.593899	3.98049	0.502963	33.6887	1072.52	1.08472	1.55238	2.42075	0.57372	0.137988	0.453358	1.23e-06	5	1261	c
645	585	91	14.7897	4.92271	7.33632	23.5096	954.008	491.048	46.4087	0.924563	0.896769	0.0460589	1.06061	0.852421	4.59334	0.673294	31.5721	939.088	1.14553	1.45528	1.06061	0.449638	0.329852	0.661211	0.0305498	2.93333	0.591397	4.58947	0.518028	31.4235	929.731	1.11996	1.62474	2.93333	0.623226	0.133369	0.455182	9.38e-07	5	799	c
646	467	70	12.0331	2.53574	7.65528	15.9464	186.604	486.766	34.1446	0.826048	0.556562	0.0486302	1.68503	0.8463	6.48153	0.622807	27.4705	710.695	1.19396	1.5266	1.68503	0.535396	0.331297	0.674213	0.0380433	4.83051	0.568076	6.59186	0.473619	27.2373	698.128	1.14915	1.62576	4.83051	0.711194	0.140982	0.467477	1.58e-06	6	567	c
647	88	30	4.9078	1.24329	2.90994	6.84113	434.243	490.249	14.7092	0.841055	-1.35319	0.0564164	1.48322	0.603988	2.8727	0.592144	35.2148	1177.8	0.983269	1.33747	1.48322	0.495664	0.162105	0.458439	0.0410651	3.95385	0.0481753	3.07698	0.407609	35.1231	1174.25	0.919267	1.46892	3.95385	0.647234	0.0528688	0.276894	1.64e-06	7	129	c
648	289	66	10.0462	3.62796	2.47768	16.3342	38.5905	495.484	32.2363	0.911405	0.489601	0.0687641	1.03757	0.690597	2.67673	0.663873	34.0145	1097.21	0.975987	1.29257	1.03757	0.44474	0.202942	0.503177	0.0493553	2.84483	0.233104	2.85477	0.516063	33.7155	1079.52	0.929103	1.42697	2.84483	0.619902	0.0404649	0.239231	8.45e-07	4	1726	c
649	733	94	14.8967	2.81328	8.42137	19.3117	907.722	508.708	38.1296	0.723445	-0.272959	0.0952086	0.59761	0.796372	2.4674	0.771604	24.9011	578.841	0.951823	1.1504	0.59761	0.36955	0.337898	0.611217	0.0707667	1.3323	0.53349	2.42794	0.657417	24.8168	575.014	0.92881	1.26597	1.3323	0.490362	0.152863	0.434786	1.01e-06	3	1365	c
650	107	35	5.45409	1.08489	3.95206	7.39818	641.029	500.86	14.4306	0.702034	0.89096	0.200988	0.431694	0.499991	1.43169	0.793989	37.9945	1395.76	0.651969	0.79167	0.431694	0.310916	0.145598	0.341905	0.156817	0.941176	-0.00472813	1.46837	0.670588	38.0941	1407.12	0.594941	0.879004	0.941176	0.422069	0.00641245	0.0750915	1.05e-06	2	380	c
651	274	56	8.78878	1.46593	5.4512	10.9415	454.188	509.852	20.5268	0.438389	-0.922567	0.091832	0.798995	0.716563	2.40948	0.703015	36.5779	1274.58	0.944415	1.20158	0.798995	0.401759	0.240223	0.528841	0.0569986	2.12554	0.370794	2.68907	0.547161	36.5152	1270.37	0.937931	1.37924	2.12554	0.562635	0.0789185	0.327314	1.61e-06	7	423	c
652	279	57	9.26363	1.98003	5.66783	12.6436	67.0672	512.512	25.0263	0.788334	0.922921	0.0549607	0.998026	0.778114	3.24896	0.663277	33.7463	1077.88	1.03719	1.34267	0.998026	0.43438	0.261933	0.576904	0.0403173	2.41014	0.463152	3.24471	0.500163	33.2765	1048.67	0.994945	1.43423	2.41014	0.572432	0.0893949	0.354394	1.05e-06	6	520	c
653	585	92	12.9435	3.64803	3.59124	19.8107	140.962	512.962	35.4916	0.744628	-0.226659	0.157725	0.567034	0.747991	2.12503	0.784803	23.8701	534.836	0.828725	1.00479	0.567034	0.363393	0.300778	0.547107	0.119569	1.37718	0.450268	2.25259	0.66367	23.8375	532.752	0.834941	1.1245	1.37718	0.500182	0.100662	0.335208	1.44e-06	7	1881	c
654	313	60	9.60941	1.63779	6.4751	12.7159	95.6004	511.41	23.8489	0.578143	0.0788348	0.0553351	1.73647	0.813722	5.66097	0.621777	29.3595	812.397	1.15508	1.51844	1.73647	0.540379	0.293236	0.637593	0.0467451	3.7381	0.525558	4.93947	0.505519	28.9365	787.409	1.0907	1.59306	3.7381	0.674405	0.11749	0.42465	1.21e-06	5	400	c
655	568	84	13.2821	3.16393	7.83337	18.6606	513.005	519.6	37.9659	0.837801	-1.44829	0.0677503	1.20301	0.836248	4.67327	0.685725	31.4004	931.013	1.10973	1.39603	1.20301	0.480746	0.340777	0.660619	0.0510823	2.91481	0.567181	4.36724	0.552285	31.0406	908.822	1.06945	1.50453	2.91481	0.624564	0.14869	0.463346	1.48e-06	2	651	c
656	214	49	7.82714	1.35384	4.82816	9.90284	552.846	512.005	21.0359	0.748899	1.50516	0.0433895	1.24191	0.809088	4.25258	0.638292	32.9961	1027.5	1.1255	1.45262	1.24191	0.475189	0.296174	0.629684	0.0292726	3.56354	0.471509	4.37142	0.464761	33.0221	1030.01	1.08322	1.60052	3.56354	0.644712	0.114326	0.420003	1.36e-06	4	279	c
657	354	65	10.2701	1.67285	6.26624	13.6118	179.169	514.329	26.0215	0.710883	0.417902	0.0888877	0.715926	0.743465	2.39538	0.738515	33.8874	1090.9	0.932331	1.16832	0.715926	0.394877	0.265564	0.54842	0.0648507	1.62013	0.415165	2.38512	0.571295	33.8929	1092.6	0.897759	1.29585	1.62013	0.501157	0.0806011	0.321123	1.59e-06	9	508	c
658	740	88	14.9741	2.01256	11.2769	18.2311	376.482	526.281	37.1356	0.695272	-1.21488	0.0628431	1.10192	0.816512	4.00271	0.691127	32.0235	967.753	1.09062	1.38535	1.10192	0.464156	0.30681	0.628264	0.0436667	2.96866	0.488569	3.90231	0.538735	31.8672	958.209	1.05209	1.52812	2.96866	0.622594	0.0974941	0.380747	1.73e-06	6	804	c
659	453	77	13.0916	4.8676	5.3569	20.8039	746.873	522.542	44.2143	0.945427	0.681906	0.0462792	2.47665	0.816701	7.75574	0.58437	29.3509	816.844	1.20311	1.61635	2.47665	0.603476	0.264512	0.623723	0.0379204	6.38743	0.501319	7.40433	0.470179	29.1047	799.52	1.17103	1.69733	6.38743	0.770776	0.116463	0.435125	8.96e-07	2	533	c
660	433	79	12.657	4.16114	5.9643	20.9058	961.74	524.508	38.8391	0.910717	1.01445	0.0328897	1.52453	0.864129	6.61021	0.618444	29.4465	817.364	1.22514	1.59535	1.52453	0.51543	0.327381	0.681526	0.0209309	4.4543	0.60371	6.62	0.442475	29.379	811.799	1.20506	1.77107	4.4543	0.70166	0.135577	0.476527	9.15e-07	4	1592	c
661	310	63	10.2224	2.92384	5.18248	15.2836	411.476	520.662	30.7298	0.890744	-0.710811	0.0826429	0.741563	0.760958	2.55111	0.726199	36.484	1267.67	0.95648	1.19098	0.741563	0.397555	0.285018	0.571754	0.0617756	1.57143	0.483393	2.52091	0.604762	36.3016	1255.79	0.928231	1.29463	1.57143	0.513322	0.109165	0.372628	1.68e-06	8	7169	c
662	713	110	14.9216	4.34241	7.32487	23.286	114.591	530.866	45.6825	0.879366	-0.160364	0.0651911	1.0173	0.832969	4.04525	0.707707	31.2068	918.612	1.08296	1.36707	1.0173	0.453072	0.323586	0.640367	0.0485818	2.55611	0.565495	3.9414	0.572558	31.0083	906.781	1.04875	1.49658	2.55611	0.602659	0.12528	0.425777	1.32e-06	6	1881	c
663	654	86	14.16	3.01544	9.46569	20.1031	45.2441	536.839	39.799	0.826736	1.24561	0.0793786	1.01989	0.854026	4.49338	0.718865	30.4355	874.375	1.08548	1.33738	1.01989	0.450567	0.365878	0.671246	0.0587654	2.37949	0.65843	4.48316	0.591015	30.2906	865.835	1.0625	1.42361	2.37949	0.579321	0.205846	0.527898	9.29e-07	5	787	c
664	594	82	13.6186	2.74284	8.12171	18.7398	241.312	538.426	36.8692	0.793237	1.2569	0.065206	0.691542	0.848844	3.28751	0.725328	33.521	1062.5	1.05508	1.28228	0.691542	0.380885	0.361165	0.65707	0.0426421	1.70038	0.650583	3.43317	0.561215	33.437	1057.61	1.03983	1.4497	1.70038	0.512947	0.16907	0.484652	1.73e-06	7	1351	c
665	565	76	13.305	2.67721	8.59202	17.5239	723.672	541.008	36.4999	0.81404	1.08336	0.046221	1.14878	0.868693	5.37441	0.668982	31.4247	931.907	1.16648	1.47474	1.14878	0.4692	0.343913	0.676763	0.034136	3.132	0.631	5.2439	0.520329	31.18	916.872	1.12957	1.61393	3.132	0.635967	0.153894	0.485714	9.78e-07	3	642	c
666	478	80	12.7537	4.08175	6.21138	19.5098	952.219	544.83	41.9621	0.920829	1.15284	0.0630632	2.22065	0.837226	7.8213	0.60573	26.8685	684.948	1.18032	1.56461	2.22065	0.582329	0.292504	0.644165	0.0586675	5.86341	0.558332	7.63781	0.489818	26.6439	670.877	1.14509	1.6055	5.86341	0.755763	0.147217	0.474542	9.62e-07	6	570	c
667	398	73	11.0887	3.10411	5.10121	16.2433	14.0945	543.383	33.0902	0.858317	1.47125	0.0391372	1.2821	0.862061	5.64736	0.66878	31.4092	931.016	1.18153	1.51698	1.2821	0.482336	0.33873	0.6792	0.0282871	3.33929	0.653877	5.82384	0.517643	31.0476	909.468	1.15595	1.6497	3.33929	0.648626	0.17426	0.519759	7.37e-07	2	1233	c
668	795	93	15.7244	2.39825	11.2591	20.4578	404.493	553.343	39.504	0.725924	-1.0522	0.0565774	1.23641	0.855145	5.26773	0.716036	30.8936	899.893	1.16045	1.45511	1.23641	0.472126	0.370529	0.695742	0.0405937	2.88392	0.648948	5.10753	0.580662	30.7021	888.402	1.12414	1.58071	2.88392	0.605799	0.195291	0.538261	1.64e-06	7	7169	c
669	405	82	12.1973	4.59612	5.77024	20.0226	212.215	543.356	42.4948	0.947703	0.2901	0.0339541	2.02905	0.826749	6.85583	0.580201	28.8912	787.587	1.21103	1.61413	2.02905	0.565236	0.28884	0.648162	0.027299	5.9269	0.521048	7.18736	0.437005	28.6345	772.194	1.18688	1.71223	5.9269	0.749875	0.146216	0.486516	1.66e-06	9	1351	c
670	386	63	10.6705	1.69522	7.69121	13.8963	645.252	553.579	27.617	0.732476	-1.49977	0.119744	0.666899	0.749488	2.33107	0.748673	22.9099	489.845	0.882937	1.0933	0.666899	0.384913	0.280802	0.548021	0.0883736	1.51335	0.429326	2.32593	0.644859	22.8309	486.236	0.86622	1.20121	1.51335	0.515058	0.105287	0.353514	1.2e-06	4	3021	c
671	779	90	15.4538	1.7716	12.2205	18.6371	80.4691	558.614	38.486	0.684388	0.619034	0.0688271	1.13214	0.889856	6.13937	0.693166	28.3724	760.912	1.14216	1.42981	1.13214	0.468484	0.364898	0.686834	0.046342	3.15439	0.690689	6.09907	0.543875	28.1204	745.516	1.13384	1.5943	3.15439	0.63956	0.179383	0.519234	1.12e-06	5	885	c
672	629	91	14.0901	2.73372	10.429	19.63	573.21	561.347	37.0995	0.786562	1.34881	0.0974205	0.944869	0.827416	3.73741	0.734331	31.2282	921.29	1.04065	1.27951	0.944869	0.441784	0.362373	0.657537	0.0671269	2.217	0.568578	3.56941	0.620772	30.9005	900.516	1.02656	1.40086	2.217	0.567093	0.169672	0.47826	1.39e-06	7	2283	c
673	364	75	11.0052	3.96733	3.57373	17.2464	601.978	560.825	36.4426	0.912722	-1.44258	0.0618414	1.10196	0.746672	3.17497	0.664728	34.7711	1146.27	1.02691	1.33896	1.10196	0.458146	0.240236	0.553357	0.0497616	2.4678	0.412666	3.10084	0.530479	34.5966	1136.18	0.977498	1.43632	2.4678	0.593238	0.0776787	0.331052	1.33e-06	9	3021	c
674	624	88	13.9582	3.52153	7.24923	19.7664	990.861	566.113	39.7873	0.834158	1.39254	0.0624291	1.32422	0.8149	4.57704	0.69816	29.8975	841.765	1.10892	1.42527	1.32422	0.489628	0.322417	0.649467	0.0468462	2.92714	0.580918	4.49233	0.584038	29.8051	835.991	1.08318	1.53871	2.92714	0.623948	0.170459	0.499282	8.36e-07	5	1592	c
675	600	91	15.1304	5.43101	6.55597	24.2009	917.212	569.095	50.1646	0.942599	0.983367	0.0487479	1.66174	0.833206	5.98143	0.636611	28.519	765.541	1.18264	1.51585	1.66174	0.52644	0.325532	0.667335	0.037211	3.88132	0.598251	5.83054	0.503309	28.2588	750.054	1.15501	1.61904	3.88132	0.667355	0.169487	0.508963	1.06e-06	4	720	c
676	682	93	14.4851	2.49315	9.9962	19.1665	430.226	568.741	37.1107	0.725974	-0.967961	0.0418688	1.08226	0.893078	6.06097	0.673964	32.7049	1012.11	1.19384	1.49953	1.08226	0.458123	0.36209	0.696201	0.0297671	3.09752	0.69889	6.1435	0.525325	32.6149	1005.6	1.1804	1.65732	3.09752	0.636924	0.164243	0.506584	1.55e-06	6	7169	c
677	648	83	14.0171	2.00367	9.25145	17.4504	140.795	567.251	35.8835	0.70925	0.532023	0.0392746	1.25174	0.896072	7.02213	0.662831	29.0866	798.229	1.24076	1.55375	1.25174	0.483738	0.380985	0.720204	0.0247081	3.43568	0.71728	7.07611	0.490509	28.8079	781.427	1.22966	1.7367	3.43568	0.65096	0.188335	0.550527	1.38e-06	6	1332	c
678	505	88	12.0539	2.85418	4.70247	16.6651	220.399	567.565	33.1591	0.744018	0.164374	0.0521896	1.58191	0.835003	5.79374	0.628193	29.6162	826.95	1.16697	1.51137	1.58191	0.524628	0.302729	0.645563	0.0362574	4.36111	0.541266	5.75342	0.475393	29.2639	805.441	1.14294	1.66727	4.36111	0.69716	0.113147	0.425719	1.61e-06	5	1555	c
679	733	101	14.9765	2.96662	7.64585	20.6339	622.993	576.693	37.3362	0.567059	0.944378	0.0321632	1.05451	0.926585	8.18186	0.661196	31.5051	940.517	1.29177	1.59554	1.05451	0.444143	0.415209	0.752716	0.0217753	2.93614	0.791157	8.02952	0.489575	31.0981	914.676	1.27375	1.75608	2.93614	0.619842	0.245872	0.623519	1.31e-06	7	3021	c
680	389	66	10.7938	2.42375	5.7799	14.4016	490.589	572.319	29.6716	0.791357	-1.39964	0.0567575	0.96103	0.826984	3.77728	0.675644	34.3751	1118.52	1.08293	1.36515	0.96103	0.433069	0.316882	0.633974	0.0429078	2.63205	0.532922	3.81757	0.524526	34.2878	1113.45	1.0492	1.50643	2.63205	0.606456	0.110182	0.401368	1.46e-06	5	682	c
681	477	70	11.9141	1.50921	8.94378	14.6684	451.494	584.145	28.0355	0.588085	-1.56988	0.138835	0.417558	0.768414	1.90152	0.806753	30.3421	874.32	0.827218	0.965582	0.417558	0.31263	0.333919	0.566517	0.0998396	0.896714	0.539037	1.97265	0.689671	30.3709	876.067	0.823085	1.10258	0.896714	0.424043	0.152647	0.408138	1.45e-06	6	7169	c
682	408	68	11.2792	2.18522	7.94676	15.3318	947.797	582.886	31.2788	0.800278	0.906505	0.0533923	1.87244	0.863469	7.85717	0.609957	27.5711	720.811	1.20337	1.55142	1.87244	0.55565	0.334751	0.681221	0.0352993	5.22319	0.610226	7.70028	0.463493	27.2058	698.012	1.19746	1.69914	5.22319	0.731603	0.163396	0.510792	1.01e-06	8	1170	c
683	579	88	13.409	3.03554	7.72213	18.9232	405.58	591.572	38.0433	0.829321	-1.38756	0.046522	0.937673	0.901265	5.74844	0.688993	33.163	1040.47	1.18784	1.45578	0.937673	0.433974	0.400307	0.719311	0.0290758	2.79764	0.696139	5.60349	0.520682	32.8723	1020.65	1.17005	1.63539	2.79764	0.615124	0.184015	0.531134	1.46e-06	5	624	c
684	726	98	15.458	4.2649	8.28225	23.1253	211.322	592.248	45.5997	0.877605	0.923552	0.0564749	1.10253	0.815256	3.98392	0.678348	31.911	960.026	1.10205	1.41025	1.10253	0.462754	0.299476	0.625677	0.0390807	2.81447	0.541305	4.0679	0.528	31.7516	951.042	1.06633	1.55775	2.81447	0.617128	0.111407	0.409735	1.47e-06	4	1555	c
685	464	68	11.7348	1.26334	9.0728	14.7017	239.081	595.127	28.2671	0.627128	1.1544	0.0830532	1.27938	0.742645	3.48563	0.681455	30.8024	895.121	1.02897	1.32483	1.27938	0.484813	0.26308	0.574951	0.0577662	2.82353	0.423377	3.44833	0.539018	30.6029	883.454	0.997458	1.45058	2.82353	0.619022	0.0792981	0.335979	1.51e-06	5	550	c
686	558	81	13.1763	2.912	7.49506	18.1952	952.609	612.809	37.0786	0.805021	1.19749	0.0399503	1.41989	0.890142	7.46239	0.636813	28.3879	761.157	1.24513	1.58407	1.41989	0.503073	0.362904	0.710321	0.0298489	3.86094	0.695631	7.34253	0.499175	28.1431	746.241	1.22231	1.72117	3.86094	0.679701	0.195096	0.557412	1e-06	6	1170	c
687	370	65	10.5971	2.43474	6.2773	14.7044	32.6203	611.335	30.9467	0.838717	1.33546	0.0333368	1.459	0.888282	7.52987	0.59786	30.7152	893.733	1.23519	1.59722	1.459	0.495202	0.343922	0.696349	0.0285261	4.40635	0.66468	7.57036	0.429987	30.2603	866.308	1.20119	1.71729	4.40635	0.694553	0.170294	0.523073	8.17e-07	3	428	c
688	338	65	9.95256	1.43527	6.1176	12.9636	516.695	609.236	24.1435	0.601815	-0.729509	0.0913309	0.72155	0.795703	2.76593	0.733172	35.1477	1173.38	0.985692	1.20453	0.72155	0.395155	0.329666	0.615145	0.0625485	1.7482	0.510762	2.78666	0.603005	34.8921	1157.23	0.953488	1.34722	1.7482	0.539056	0.140049	0.428517	1.27e-06	5	1340	c
689	664	115	13.3977	4.55968	3.25001	20.3202	94.4698	625.124	40.1815	0.787669	1.21552	0.0754063	0.854235	0.75145	2.71843	0.713498	34.1783	1107.27	0.993249	1.26529	0.854235	0.417037	0.263741	0.564925	0.0526278	1.81866	0.488241	2.77687	0.585083	34.0933	1102.75	0.965346	1.39563	1.81866	0.532838	0.0967775	0.36376	1.04e-06	5	1018	c
690	490	98	12.0598	3.62217	4.93254	17.9365	367.479	627.536	35.4564	0.801286	0.933812	0.0537333	0.779642	0.870189	4.00299	0.701454	35.4195	1188.78	1.10411	1.34972	0.779642	0.394737	0.378103	0.6834	0.0371391	1.99275	0.676111	4.0763	0.547528	35.2585	1177.6	1.09286	1.50832	1.99275	0.549936	0.178694	0.506153	1.26e-06	4	1150	c
691	488	83	12.6448	3.87808	6.92457	19.0816	792.735	631.803	38.8981	0.901862	1.332	0.0421217	1.45028	0.777869	4.26446	0.641294	32.7033	1008.94	1.1228	1.49973	1.45028	0.508732	0.246642	0.586702	0.0300073	3.45455	0.475059	4.29041	0.492465	32.5837	1001.51	1.09087	1.62319	3.45455	0.654597	0.103217	0.402409	1.26e-06	6	639	c
692	239	54	8.42063	2.23607	4.85726	11.9459	982.7	625.939	24.6449	0.842132	-1.54977	0.107841	0.696512	0.674392	2.06956	0.748023	34.9709	1166.99	0.862193	1.084	0.696512	0.392659	0.234807	0.50053	0.0907907	1.53093	0.334707	2.15057	0.630412	35.0773	1175.73	0.83321	1.17799	1.53093	0.516698	0.0786426	0.303197	8.79e-07	6	379	c
693	407	69	11.3149	2.97507	7.04689	16.2193	14.3992	634.741	34.1564	0.876216	1.24727	0.0901889	0.743198	0.81416	2.99957	0.723159	20.3703	382.734	0.993004	1.21397	0.743198	0.396999	0.344435	0.629738	0.0678322	1.7151	0.549169	2.90215	0.576236	20.0627	370.981	0.955424	1.32147	1.7151	0.52494	0.140787	0.425886	6.96e-07	5	4027	c
694	540	74	12.7542	1.79894	9.21146	15.8596	57.189	634.265	32.6002	0.71369	0.556724	0.0886789	1.4783	0.793937	4.58701	0.661137	29.0325	796.157	1.04527	1.35917	1.4783	0.512634	0.266036	0.58397	0.067918	3.49053	0.46391	4.25554	0.530474	28.7874	781.874	0.996322	1.4395	3.49053	0.651234	0.0924687	0.360916	8.89e-07	6	619	c
695	465	81	12.348	3.13291	6.72907	17.7725	354.323	648.507	34.8722	0.855243	-1.277	0.0627415	0.731395	0.83875	3.26789	0.714535	36.1384	1239.39	1.05199	1.29533	0.731395	0.388044	0.336069	0.638283	0.0446865	1.87147	0.573708	3.19505	0.5602	36.036	1234.56	0.998089	1.42797	1.87147	0.540336	0.130054	0.424436	1.12e-06	3	1150	c
696	746	90	15.3891	3.05616	10.5658	20.6794	153.193	655.679	41.5123	0.81502	0.949218	0.0649922	0.896246	0.846161	3.91293	0.730522	31.7638	951.132	1.09825	1.35623	0.896246	0.430488	0.365036	0.673986	0.0435931	2.08258	0.632103	3.83039	0.594402	31.545	937.548	1.07688	1.49873	2.08258	0.56418	0.164376	0.48519	1.03e-06	3	882	c
697	707	134	16.2879	5.69415	7.59111	27.8779	649.708	663.709	53.4488	0.932999	-1.5454	0.0424586	1.01	0.87049	4.89931	0.667904	35.1845	1172.18	1.16118	1.4719	1.01	0.440724	0.338569	0.671661	0.0299148	2.6661	0.660136	4.92231	0.507612	34.9056	1153.26	1.13818	1.63799	2.6661	0.596108	0.153826	0.48875	1.14e-06	6	1546	c
698	475	78	12.8348	4.09144	6.19363	19.4686	929.919	654.045	41.1915	0.919272	0.623815	0.0435104	1.62521	0.847648	6.33375	0.61507	29.5275	822.441	1.19503	1.55821	1.62521	0.526858	0.304997	0.655156	0.0312377	4.29975	0.590692	6.25247	0.469915	29.2973	807.577	1.17495	1.68774	4.29975	0.693654	0.143827	0.479734	9.86e-07	4	1435	c
699	483	70	12.1311	1.69689	9.35408	15.5687	967.199	654.089	29.8728	0.574052	-0.736306	0.0258481	2.433	0.875375	10.7613	0.566519	24.6102	577.591	1.35123	1.76611	2.433	0.587663	0.33988	0.717485	0.0182007	6.13882	0.679758	10.5847	0.4119	24.4118	565.969	1.30831	1.88907	6.13882	0.746163	0.202195	0.588368	8.81e-07	6	568	c
700	512	75	12.4123	1.98646	8.8763	15.6278	1011.09	659.292	32.5307	0.729142	-1.43243	0.0568167	1.4544	0.871178	6.64502	0.648322	28.2611	754.28	1.18425	1.47335	1.4544	0.512197	0.385908	0.711093	0.0449019	3.54773	0.650146	6.0703	0.511541	27.775	725.357	1.15502	1.58785	3.54773	0.660539	0.201645	0.547345	6.89e-07	4	820	c
701	540	79	13.1577	2.98303	8.01042	18.7846	55.1308	661.123	36.3853	0.819102	0.615595	0.0451488	1.39189	0.870185	6.36104	0.669761	29.7739	837.122	1.18945	1.52385	1.39189	0.49875	0.341663	0.682856	0.0345618	3.20563	0.684725	6.08386	0.544089	29.3052	809.177	1.16187	1.63653	3.20563	0.638432	0.190789	0.54027	8.01e-07	6	644	c
702	453	72	11.7248	1.87033	8.21269	15.5761	105.66	665.38	30.1141	0.722556	0.808708	0.0937255	0.478002	0.851755	2.6122	0.785256	25.6647	616.443	0.956955	1.11797	0.478002	0.330212	0.393809	0.649628	0.0707567	1.03439	0.661015	2.52572	0.654233	25.2249	594.927	0.93786	1.24783	1.03439	0.43645	0.186278	0.475503	9.09e-07	5	1606	c
703	510	74	12.4707	2.41837	7.47321	16.362	191.764	666.509	34.3651	0.796783	1.12371	0.0811089	1.98796	0.817222	6.43819	0.632003	27.2571	703.255	1.11342	1.47166	1.98796	0.562726	0.273281	0.610234	0.0577037	5.12222	0.516602	6.29815	0.505096	26.8911	682.28	1.08007	1.58023	5.12222	0.722463	0.111237	0.412113	1.02e-06	3	606	c
704	379	74	9.97562	2.32085	3.28478	13.6483	381.484	668.558	24.5112	0.457324	0.988494	0.0464694	1.14791	0.807206	3.97703	0.661799	35.3369	1182.72	1.10306	1.42927	1.14791	0.464059	0.286169	0.616074	0.033722	2.91667	0.517948	4.02526	0.501546	35.2438	1178.35	1.05076	1.55332	2.91667	0.617195	0.111794	0.409889	8.91e-07	4	483	c
705	427	70	11.4939	2.41375	8.00757	15.9035	789.648	671.571	32.6638	0.824138	1.17852	0.0435013	1.78891	0.860103	7.39367	0.613526	28.8122	784.899	1.22395	1.57224	1.78891	0.543009	0.334726	0.68447	0.0359182	5.192	0.609392	7.64605	0.470257	28.7813	782.636	1.19069	1.69552	5.192	0.72656	0.160758	0.506462	1.2e-06	7	493	c
706	504	105	13.8685	4.94338	4.67098	21.9395	17.9806	682.691	44.9134	0.920421	1.29615	0.0355916	1.38529	0.897458	7.75476	0.617907	31.7046	955.178	1.21621	1.5626	1.38529	0.492322	0.348724	0.695087	0.0261295	4.40654	0.69423	8.20565	0.45352	31.2897	929.502	1.20508	1.72091	4.40654	0.70123	0.174389	0.529334	5.87e-07	5	4027	c
707	408	66	11.0014	1.32875	8.22085	13.2095	413.615	672.99	26.5418	0.656497	1.11056	0.0538258	1.29842	0.790312	4.09608	0.662807	35.2497	1177.26	1.10032	1.4496	1.29842	0.487707	0.26843	0.601675	0.0453085	2.70845	0.546743	3.98777	0.552842	35.105	1168.68	1.0545	1.5258	2.70845	0.613254	0.138013	0.449925	7.9e-07	2	464	c
708	265	50	8.85315	1.36108	6.3237	11.3274	767.436	672.33	23.6197	0.745849	0.983634	0.0353071	2.00103	0.848793	7.61686	0.576238	30.8019	899.486	1.22112	1.60483	2.00103	0.559615	0.305444	0.662785	0.0270365	6.04036	0.582563	8.23506	0.39688	30.5695	885.509	1.1993	1.73946	6.04036	0.740604	0.152433	0.499508	1.23e-06	10	299	c
709	624	98	14.3557	5.14775	4.77082	22.4523	291.29	686.629	48.3574	0.924043	-1.47909	0.0313001	1.28811	0.901294	7.52494	0.641543	33.295	1051.11	1.25902	1.6122	1.28811	0.485757	0.360436	0.71259	0.022763	3.51873	0.724214	7.37944	0.49328	32.8296	1020.16	1.23596	1.76992	3.51873	0.661596	0.191568	0.559192	9.14e-07	5	790	c
710	266	55	8.87664	2.04042	5.11737	12.0154	256.318	680.848	25.6762	0.82642	-1.50431	0.0445876	1.871	0.818602	6.15718	0.607783	30.7688	894.949	1.16831	1.53998	1.871	0.552166	0.278921	0.626857	0.0394568	4.91556	0.53486	6.28395	0.470119	30.4444	875.692	1.12769	1.6077	4.91556	0.713684	0.145013	0.471444	9.73e-07	6	344	c
711	263	72	9.00439	2.84547	3.19363	14.548	738.793	690.163	27.3651	0.845047	-1.07621	0.0423263	1.54713	0.758122	4.19816	0.611191	35.61	1202.78	1.09138	1.48206	1.54713	0.514683	0.228255	0.563396	0.0374844	3.36224	0.485934	4.27025	0.497125	35.4745	1194.82	1.04923	1.53952	3.36224	0.650739	0.115195	0.41417	1.14e-06	9	1072	c
712	434	88	11.2955	3.34211	4.3736	16.1827	50.7723	691.903	34.5107	0.831278	0.731912	0.0519152	0.855696	0.849837	3.84922	0.678481	34.2089	1107.35	1.09074	1.36408	0.855696	0.403164	0.333634	0.648744	0.0353237	2.39452	0.584418	3.88092	0.501467	33.9288	1089.46	1.06032	1.52154	2.39452	0.572506	0.139153	0.451138	6.52e-07	5	684	c
713	485	109	12.5036	3.30009	6.23985	19.0386	98.7685	693.041	34.848	0.8238	0.719422	0.133022	0.544202	0.687312	1.8702	0.774742	36.6659	1287.32	0.827629	1.01612	0.544202	0.352877	0.249716	0.50169	0.104951	1.06948	0.374621	1.85506	0.664764	36.6526	1288.49	0.789889	1.1092	1.06948	0.451005	0.0788297	0.294967	7.46e-07	3	1606	c
714	535	94	13.6569	4.91728	5.98145	21.337	169.779	706.236	46.2046	0.939115	1.47334	0.0649456	1.0121	0.850923	4.39454	0.679566	31.6694	947.309	1.09578	1.36214	1.0121	0.447608	0.360353	0.671185	0.050575	2.62528	0.590118	4.20248	0.534492	31.2195	919.782	1.05998	1.47886	2.62528	0.607438	0.162681	0.48	7.43e-07	2	626	c
715	459	74	11.6087	2.05449	6.44859	14.6367	780.544	702.86	30.0698	0.684469	-1.49854	0.0451647	1.51874	0.864638	6.60988	0.635954	30.4871	878.542	1.20194	1.53775	1.51874	0.519826	0.345272	0.688199	0.0351075	3.79949	0.62976	6.13111	0.503747	30	848.308	1.16282	1.65114	3.79949	0.681149	0.170211	0.514281	1.02e-06	7	526	c
716	40	19	3.10827	0.572336	1.86675	3.89474	634.293	692.697	8.62951	0.720428	1.36865	0.1992	0.536	0.360223	1.4189	0.7512	39.304	1496.86	0.629504	0.807123	0.536	0.331487	0.103158	0.289907	0.178719	0.727273	0.12	1.41322	0.690909	39.2727	1498.88	0.569275	0.796548	0.727273	0.363406	0.0378923	0.174062	8.85e-07	3	1546	c
717	505	86	13.6712	4.85146	6.70592	22.1594	824.028	712.979	45.4737	0.936653	1.07908	0.0469345	1.86777	0.833398	6.60549	0.630889	27.9277	735.321	1.1926	1.55293	1.86777	0.549412	0.313433	0.662215	0.0352486	4.14657	0.610727	6.32605	0.502893	27.513	711.541	1.16184	1.61519	4.14657	0.686797	0.166811	0.504662	8.56e-07	2	644	c
718	352	60	10.2153	1.75209	7.75314	13.4825	1021.7	708.287	27.322	0.769515	1.33282	0.0389356	1.49039	0.837282	5.57968	0.654126	30.4343	872.566	1.18129	1.53275	1.49039	0.50094	0.315725	0.661131	0.0286223	3.47279	0.617582	5.54057	0.496507	30.1871	857.502	1.15584	1.64639	3.47279	0.620137	0.178286	0.524867	4.77e-07	2	443	c
719	113	32	5.59445	0.693861	4.1798	6.86263	974.246	703.828	14.1023	0.634329	-0.762727	0.0419329	1.44275	0.754394	3.93711	0.577863	33.4835	1059.36	1.09442	1.47007	1.44275	0.471971	0.233338	0.567285	0.0342969	3.5125	0.369168	3.78402	0.407981	33.3375	1051.51	1.02833	1.53851	3.5125	0.601769	0.110225	0.405328	6.42e-07	4	261	c
720	629	130	13.6916	4.23072	2.64617	20.4127	31.5094	719.745	38.6913	0.732351	1.4365	0.0313522	1.60889	0.897073	8.81563	0.622159	29.3833	819.679	1.27589	1.6478	1.60889	0.52496	0.355696	0.713991	0.0255402	4.24606	0.731634	8.91095	0.471662	28.7303	782.694	1.24767	1.75285	4.24606	0.688557	0.200649	0.568832	4.54e-07	3	4027	c
721	451	75	12.1716	3.37321	6.0106	18.2839	744.245	715.53	36.4873	0.875834	1.09509	0.0600991	1.89042	0.843545	7.0414	0.610272	29.9707	852.833	1.15125	1.51641	1.89042	0.553458	0.278752	0.622962	0.0461598	4.7328	0.558597	6.3611	0.46138	29.5635	826.522	1.10633	1.60322	4.7328	0.703172	0.109569	0.411823	9.3e-07	7	1072	c
722	167	49	7.3498	2.56455	2.88478	12.3477	909.252	712.542	23.9182	0.908959	1.43091	0.101761	0.679862	0.637976	1.93897	0.726162	29.3683	817.001	0.838964	1.06566	0.679862	0.376889	0.191558	0.449544	0.10474	1.10744	0.361151	1.86674	0.634711	29.4215	822.987	0.774888	1.03914	1.10744	0.439091	0.0723535	0.273939	7.09e-07	2	1466	c
723	653	94	14.4354	4.16254	7.3509	20.4105	709.072	718.235	44.3102	0.87899	0.325198	0.0770192	1.72379	0.871112	7.68713	0.633071	29.9066	852.547	1.13989	1.48786	1.72379	0.541142	0.315938	0.65406	0.0682077	4.62872	0.634139	7.3258	0.502741	29.5534	829.766	1.10888	1.58575	4.62872	0.715049	0.15096	0.477622	8.72e-07	5	698	c
724	364	59	10.3614	1.13495	8.12904	12.8207	963.145	727.775	26.1363	0.642107	1.12691	0.0309911	2.70984	0.845146	9.7497	0.554381	25.6987	627.129	1.30939	1.7589	2.70984	0.614712	0.300006	0.680065	0.0283617	6.93182	0.580826	9.26842	0.434229	25.3084	604.192	1.26577	1.80394	6.93182	0.777822	0.17182	0.536263	5.24e-07	2	429	c
725	367	64	10.3434	1.02391	8.1306	12.7346	771.123	729.474	24.5159	0.494176	0.121617	0.0285462	1.74022	0.874584	7.93782	0.608963	30.1653	860.472	1.27828	1.66307	1.74022	0.53756	0.336475	0.699788	0.0205079	4.46815	0.656694	7.50753	0.444406	29.9586	846.026	1.24511	1.79104	4.46815	0.684504	0.180797	0.547288	7.89e-07	3	565	c
726	229	59	8.08786	1.56699	4.53747	10.5555	662.442	17.5067	18.8565	0.322678	-0.162896	0.0330444	2.127	0.832204	7.33808	0.581558	26.82	678.436	1.22289	1.63342	2.127	0.565068	0.291379	0.653557	0.0243869	6.38542	0.543871	7.99957	0.4052	26.7083	672.646	1.19298	1.76165	6.38542	0.764723	0.149784	0.498155	6.07e-07	7	9498	l
727	230	47	8.10233	0.571013	6.624	8.96475	571.725	28.7617	19.7399	0.457285	1.16242	0.0209558	4.54241	0.800682	12.3949	0.470269	21.7658	458.313	1.3385	1.85481	4.54241	0.709286	0.255381	0.64731	0.0232492	12.4225	0.442619	12.1436	0.349391	20.7112	409.66	1.28166	1.84912	12.4225	0.894338	0.180728	0.554489	6.43e-07	7	1426	l
728	283	52	9.10053	1.39041	6.93215	12.0247	148.396	33.114	24.4087	0.699793	-1.5553	0.0299018	3.46577	0.831376	11.2766	0.492262	21.2941	437.207	1.30495	1.77173	3.46577	0.655064	0.280427	0.662498	0.0207017	9.77966	0.500305	10.7856	0.330507	20.4237	396.888	1.25277	1.86772	9.77966	0.841485	0.147483	0.507192	7.63e-07	9	749	l
729	200	44	7.57375	0.65188	6.44626	8.9295	394.843	32.3448	18.0223	0.423841	1.34755	0.0273061	3.65	0.811861	10.7003	0.50867	22.0667	465.853	1.3133	1.77225	3.65	0.661843	0.276206	0.658262	0.0194964	10.2025	0.481684	10.8419	0.33454	21.4294	435.355	1.2753	1.85767	10.2025	0.821114	0.170095	0.540396	5.15e-07	4	1440	l
730	198	45	7.48682	0.632308	6.2194	8.60445	662.659	33.2225	18.3909	0.553459	-0.83036	0.0310552	2.36466	0.816017	7.42629	0.557952	25.6999	621.479	1.24299	1.67924	2.36466	0.585467	0.272412	0.641207	0.0238728	6.46309	0.464845	7.03852	0.396236	24.7987	575.574	1.17911	1.73686	6.46309	0.762501	0.138713	0.477581	6.86e-07	7	9498	l
731	252	51	8.57326	0.774522	7.22043	10.2162	462.504	35.3093	21.1402	0.568641	0.517756	0.0425056	2.80174	0.82175	8.85903	0.555592	22.2832	471.176	1.24654	1.65977	2.80174	0.624307	0.287764	0.653901	0.0328102	7.84135	0.479118	8.52699	0.415674	21.6106	438.949	1.19778	1.70928	7.84135	0.799515	0.140327	0.476835	6.34e-07	5	1332	l
732	324	65	9.91096	1.32543	7.70319	13.314	721.551	38.0338	23.6452	0.453887	-1.22577	0.0295226	2.51482	0.862882	10.1703	0.559565	24.232	559.984	1.30129	1.71759	2.51482	0.601504	0.311033	0.684686	0.0227918	7.11567	0.581736	9.50621	0.404871	23.4291	518.503	1.2572	1.81568	7.11567	0.777791	0.164322	0.5268	6.69e-07	7	9498	l
733	202	49	7.62944	1.11139	5.36098	9.78156	552.103	43.1796	20.1295	0.647814	1.29967	0.0158825	3.87778	0.83152	12.5081	0.430467	23.0306	510.683	1.38505	1.91001	3.87778	0.658838	0.275703	0.676077	0.0136268	12.5409	0.480186	13.0629	0.260261	22.0126	463.703	1.3246	1.97311	12.5409	0.880732	0.183456	0.573322	7.14e-07	6	621	l
734	278	58	9.01425	1.4842	5.8477	11.9333	401.513	48.2651	23.692	0.678309	-0.874661	0.0501834	2.74975	0.838123	9.49335	0.562044	21.7171	450.235	1.24734	1.63606	2.74975	0.619712	0.306381	0.66839	0.0352128	7.33772	0.476133	8.00342	0.426603	20.6974	401.608	1.17988	1.67287	7.33772	0.786789	0.135695	0.464907	5.95e-07	5	1440	l
735	243	63	8.48738	1.91652	3.94677	11.7624	46.6547	56.0368	21.2308	0.498496	0.100815	0.02264	3.28455	0.848422	11.8346	0.512556	23.2009	517.863	1.34207	1.83458	3.28455	0.650594	0.267226	0.657362	0.016408	9.82967	0.523178	11.3075	0.328715	21.7637	450.838	1.28356	1.90717	9.82967	0.841242	0.140474	0.500348	5.9e-07	8	1912	l
736	169	41	6.9175	0.858544	5.56744	8.65582	515.513	54.7594	17.774	0.65359	-1.5666	0.0506258	2.78607	0.751241	6.59994	0.537073	26.0398	638.951	1.1533	1.57858	2.78607	0.622913	0.219159	0.567407	0.0359245	6.28244	0.438879	6.59811	0.391037	25.3664	604.201	1.11582	1.614	6.28244	0.75396	0.103684	0.402241	7.63e-07	7	626	l
737	211	43	7.85913	0.74958	6.31518	9.99524	78.1959	58.4307	18.5999	0.555441	-0.580839	0.0573425	0.864474	0.836799	3.64849	0.678289	29.8276	836.828	1.06832	1.32571	0.864474	0.405707	0.336282	0.644106	0.0405924	2.22699	0.539815	3.41967	0.497546	29.5276	820.231	1.01833	1.46174	2.22699	0.539272	0.131445	0.431145	7.55e-07	12	721	l
738	218	47	7.9424	1.02936	6.47312	10.2141	248.824	61.9344	20.5686	0.682609	-0.177608	0.0475309	2.23731	0.802265	6.65736	0.557391	26.9962	687.74	1.16311	1.56511	2.23731	0.58201	0.262339	0.613682	0.0285837	6.0113	0.446163	6.42695	0.400524	26.3503	651.962	1.12597	1.71392	6.0113	0.743982	0.110076	0.425421	7.22e-07	8	503	l
739	176	44	7.09249	1.12553	5.07872	9.33579	811.264	63.1013	17.676	0.540547	-0.616264	0.0219032	2.89711	0.800967	8.27794	0.506906	25.5981	617.056	1.29084	1.77137	2.89711	0.614139	0.251541	0.631908	0.017668	8.15556	0.454331	8.47299	0.333868	25.163	593.732	1.24653	1.84704	8.15556	0.78355	0.142345	0.496515	4.48e-07	5	486	l
740	283	60	9.24251	1.7964	6.08678	13.0275	404.052	66.6394	24.307	0.704629	1.23014	0.0329579	3.2271	0.749937	7.45257	0.52072	24.155	547.563	1.24254	1.72278	3.2271	0.640543	0.217707	0.586112	0.0312368	7.72018	0.283015	6.38378	0.36819	23.1239	497.279	1.13603	1.72412	7.72018	0.794125	0.0959242	0.39933	6.71e-07	7	1440	l
741	162	39	6.77914	0.786088	5.08035	8.19567	506.758	67.6338	17.1947	0.646361	0.77736	0.0586469	2.40657	0.733276	5.51136	0.576781	26.7249	670.459	1.13545	1.51713	2.40657	0.598319	0.239514	0.581561	0.03936	5.736	0.380292	5.62798	0.443507	26.008	633.623	1.0912	1.57191	5.736	0.733313	0.103193	0.396493	8.19e-07	6	626	l
742	207	46	7.6956	0.696868	6.0459	9.28935	803.08	77.0643	18.2141	0.490126	-1.32117	0.0361095	2.31635	0.794857	6.6457	0.556897	25.6542	617.456	1.21669	1.62113	2.31635	0.584665	0.275377	0.635699	0.025326	5.99394	0.426968	6.23002	0.406217	24.9152	579.347	1.15761	1.71565	5.99394	0.753108	0.115179	0.434923	5.19e-07	7	486	l
743	241	49	8.33474	0.833387	6.61945	10.0935	97.8563	78.372	20.6583	0.541453	-1.01471	0.0233784	3.77107	0.815025	11.1934	0.493252	22.7506	495.797	1.33108	1.82434	3.77107	0.674287	0.261096	0.649467	0.0153625	10.94	0.471649	11.353	0.342594	21.91	455.294	1.2988	1.94862	10.94	0.864583	0.135812	0.49717	9.05e-07	9	312	l
744	271	51	8.86666	0.658351	7.59178	10.0229	61.3747	80.0947	20.9103	0.557878	-0.886626	0.0497861	2.21026	0.638039	4.05318	0.601689	27.3994	701.812	1.09713	1.52189	2.21026	0.579804	0.181784	0.512222	0.0335718	5.82979	0.213417	4.70577	0.453092	27.1234	687.525	1.07476	1.66071	5.82979	0.748807	0.0628034	0.319507	7.43e-07	11	335	l
745	233	46	8.18765	0.616603	7.01672	9.76327	213.886	85.7669	19.7932	0.425011	-0.941465	0.0248265	4.63251	0.791367	12.102	0.464511	21.7538	456.752	1.33382	1.84495	4.63251	0.705809	0.253118	0.643529	0.0185285	11.2896	0.391925	10.2831	0.300817	20.0656	379.613	1.25679	1.87681	11.2896	0.863529	0.128953	0.477436	9.43e-07	10	292	l
746	155	42	6.59406	0.762094	5.13944	8.41962	131.232	88.6706	15.8837	0.508027	-0.583794	0.0590455	2.37798	0.691544	4.85466	0.561506	27.545	713.915	1.07092	1.46673	2.37798	0.587643	0.198756	0.525856	0.0406805	5.72174	0.199412	4.57346	0.392385	26.5913	663.564	0.998498	1.53593	5.72174	0.724707	0.0937875	0.374528	1.03e-06	11	451	l
747	204	43	7.64021	0.648925	5.90991	8.68286	116.302	91.7035	18.5095	0.522414	0.529734	0.0430244	3.21031	0.74698	7.34399	0.528162	23.4084	515.397	1.19959	1.65667	3.21031	0.647185	0.214165	0.572626	0.0334803	8.70303	0.28962	7.12562	0.377344	22.5455	474.07	1.13821	1.67867	8.70303	0.812456	0.10563	0.41319	1e-06	12	451	l
748	203	43	7.64373	0.854234	5.95971	9.43309	437.466	98.6561	19.0369	0.601691	-1.21886	0.048995	2.54843	0.77001	6.5403	0.586665	24.764	576.024	1.17562	1.57889	2.54843	0.60746	0.260442	0.613783	0.0406986	5.60759	0.436346	5.97432	0.470334	23.962	536.685	1.10606	1.65652	5.60759	0.741867	0.108345	0.415739	8.4e-07	8	2836	l
749	265	57	9.04175	1.88348	5.15864	12.7719	151.29	101.217	25.3976	0.795098	-0.838836	0.0289808	2.47495	0.844677	8.96709	0.565045	23.9885	544.452	1.2936	1.7244	2.47495	0.597919	0.297978	0.67325	0.0239234	5.64593	0.623301	8.49397	0.42345	23.0144	497.627	1.25897	1.78375	5.64593	0.746365	0.178042	0.542529	1.09e-06	12	3191	l
750	292	52	9.19801	0.441316	8.11279	10.0886	88.0184	103.416	22.1582	0.455985	-0.494081	0.0380384	3.65706	0.810488	10.6486	0.530582	20.6441	410.46	1.26566	1.72655	3.65706	0.668167	0.264698	0.639894	0.033064	8.46	0.533206	10.0618	0.403186	20.028	381.608	1.21789	1.74413	8.46	0.815092	0.134571	0.471674	9.36e-07	9	372	l
751	271	52	8.87638	1.06974	6.17439	11.191	560.174	109.698	22.0803	0.542629	-0.62775	0.0254145	2.77755	0.853067	10.4518	0.525938	23.4692	525.652	1.31917	1.77096	2.77755	0.615179	0.291262	0.673227	0.0193037	8.75	0.555274	10.8375	0.37108	23.2155	511.802	1.2792	1.88002	8.75	0.823561	0.151695	0.515288	9.92e-07	9	1474	l
752	200	52	7.48263	1.5248	4.4735	10.7923	458.07	109.78	20.0845	0.730166	0.318241	0.0552247	1.11033	0.771293	3.4274	0.648315	31.7468	950.927	1.04946	1.3704	1.11033	0.452179	0.249094	0.568235	0.0442245	3.39264	0.390691	3.78401	0.496486	31.6258	944.246	1.02343	1.49618	3.39264	0.645382	0.0984381	0.378819	9.05e-07	10	2836	l
753	216	49	7.84841	0.7926	6.2449	9.3065	443.353	113.27	19.0185	0.523873	-1.10644	0.0393007	2.15701	0.782054	5.94851	0.588855	23.9949	537.483	1.19472	1.59061	2.15701	0.574712	0.262184	0.617402	0.0306904	5.94915	0.42167	6.14339	0.413295	23.5989	519.032	1.13984	1.69282	5.94915	0.745761	0.121845	0.444066	8.81e-07	10	2836	l
754	243	49	8.36834	0.901696	6.89089	10.0679	678.056	111.906	21.295	0.610693	0.156505	0.0351515	3.70282	0.788062	9.73561	0.534619	21.4859	440.077	1.26615	1.7258	3.70282	0.667488	0.26027	0.635074	0.028936	10.3443	0.42831	10.0472	0.393787	21.0047	417.286	1.21982	1.76494	10.3443	0.855053	0.134449	0.473935	9.41e-07	8	1371	l
755	130	43	6.09924	1.36909	2.83158	8.7388	489.374	112.647	15.7457	0.66679	-1.44817	0.061173	1.25566	0.6334	2.71257	0.648776	31.776	954.571	0.970565	1.30546	1.25566	0.480682	0.183406	0.481374	0.0483525	2.73034	0.237533	2.79046	0.501291	31.2921	927.349	0.912575	1.40073	2.73034	0.588172	0.0590355	0.285795	9.58e-07	12	2836	l
756	241	49	8.3131	0.739983	6.75806	9.80722	526.57	117.265	20.6464	0.526393	0.621738	0.0286909	3.53478	0.833892	11.64	0.476065	22.9054	506.185	1.29149	1.79391	3.53478	0.658888	0.252462	0.635988	0.0190837	10.4478	0.512209	11.7093	0.311929	22.1692	469.601	1.25954	1.87996	10.4478	0.853809	0.140334	0.497022	9.99e-07	10	805	l
757	228	46	8.07112	0.495032	6.71331	9.11658	65.2894	119.586	19.6823	0.436232	1.53565	0.0260829	4.88675	0.791704	12.7303	0.456351	20.559	410.422	1.36561	1.88404	4.88675	0.721725	0.251102	0.646406	0.021381	12.8796	0.437403	12.4465	0.339176	19.6859	370.955	1.29976	1.8826	12.8796	0.908318	0.153164	0.517888	8.44e-07	7	290	l
758	171	49	6.90061	1.30995	3.75693	8.88545	691.42	122.101	17.3559	0.551889	1.2376	0.0320643	2.85092	0.751308	6.73183	0.524138	27.3869	705.679	1.20291	1.67588	2.85092	0.623159	0.229379	0.593485	0.0324306	6.79167	0.358501	6.29359	0.4191	26.275	646.951	1.12409	1.6619	6.79167	0.761842	0.120291	0.437727	9.4e-07	8	1371	l
759	223	51	8.05312	1.25217	5.89541	10.2857	659.133	123.964	21.1612	0.662474	1.04142	0.0254169	3.61423	0.813351	10.6819	0.501369	24.1286	556.662	1.29116	1.77307	3.61423	0.66568	0.277864	0.660074	0.021634	9.87978	0.517536	11.2389	0.357291	23.694	535.064	1.24431	1.80965	9.87978	0.842053	0.151663	0.506891	9.79e-07	10	9498	l
760	216	49	7.85879	0.637157	6.75041	9.37739	238.424	125.216	19.0387	0.507398	-0.199096	0.0403057	2.10769	0.846284	7.85578	0.58692	24.4385	564.132	1.22604	1.6101	2.10769	0.572355	0.314437	0.672	0.030173	6.89326	0.519676	8.17563	0.431652	24.073	545.449	1.18985	1.72116	6.89326	0.781693	0.154879	0.500947	9.92e-07	9	835	l
761	218	46	7.87204	0.671675	6.51365	9.327	732.896	131.98	18.745	0.525486	1.55592	0.0373681	3.25032	0.630548	5.39883	0.543698	26.0114	632.774	1.14315	1.61154	3.25032	0.644335	0.178662	0.520635	0.0342439	5.75	0.17529	4.48608	0.44652	25.1786	591.031	1.03657	1.57992	5.75	0.739256	0.0947506	0.381338	8.85e-07	9	272	l
762	321	55	9.70403	0.705331	8.34852	11.021	126.256	139.621	23.3882	0.485435	1.4197	0.0409208	3.68101	0.821543	11.3134	0.523855	21.2776	437.868	1.27027	1.73882	3.68101	0.672119	0.250649	0.626439	0.0322207	10.9635	0.470029	11.3435	0.380406	20.5109	402.929	1.21022	1.79657	10.9635	0.866281	0.137026	0.481917	1.15e-06	11	395	l
763	259	50	8.62499	0.812863	7.12101	10.2912	317.131	138.506	21.1243	0.609525	-1.33723	0.0345008	2.3154	0.765415	5.93509	0.571006	27.1783	692.963	1.18715	1.62465	2.3154	0.590065	0.234096	0.591586	0.0288693	5.73113	0.3978	5.75849	0.419962	26.5613	659.883	1.13338	1.67994	5.73113	0.737738	0.103751	0.409786	7.37e-07	5	316	l
764	238	49	8.33022	1.3773	5.66013	10.8099	214.317	141.836	23.0551	0.739839	1.26678	0.0261468	4.2419	0.816693	12.5705	0.458267	23.1377	518.095	1.31904	1.83073	4.2419	0.693244	0.248683	0.636735	0.0221083	12.7208	0.45874	12.7511	0.302495	22.203	472.89	1.26012	1.87725	12.7208	0.88808	0.155578	0.521006	1.12e-06	12	506	l
765	239	50	8.28917	0.872713	6.76225	10.0721	236.243	141.104	20.7323	0.571919	0.920019	0.0221124	3.04839	0.852114	11.3066	0.492566	23.3894	524.145	1.34475	1.81481	3.04839	0.624698	0.292281	0.680228	0.0182139	8.93814	0.528354	10.4755	0.322565	22.2784	470.095	1.27522	1.86566	8.93814	0.825684	0.13571	0.487705	1.04e-06	11	835	l
766	230	46	8.13135	0.702864	6.82515	9.97693	344.713	142.498	19.4583	0.490503	-1.3773	0.048502	3.21027	0.752949	7.49718	0.560749	25.1219	596.022	1.17937	1.60304	3.21027	0.646402	0.24271	0.598141	0.0402493	8.41579	0.371397	7.69404	0.442128	24.4263	560.67	1.13877	1.65535	8.41579	0.796303	0.137988	0.466439	7.12e-07	7	294	l
767	205	44	7.62009	0.44053	6.68371	8.41747	805.058	139.901	17.9969	0.364385	-0.406303	0.0283181	3.71332	0.788998	9.79927	0.507566	22.6339	487.023	1.29055	1.76252	3.71332	0.668154	0.25943	0.639283	0.0250092	11.3237	0.413051	10.6462	0.360534	22.422	476.264	1.23229	1.78198	11.3237	0.851835	0.130756	0.46974	5.85e-07	7	253	l
768	208	44	7.70184	0.72286	6.26498	9.34077	559.715	144.48	18.8304	0.574854	0.41858	0.0461924	3.38564	0.689312	6.44861	0.54225	25.0585	589.019	1.17107	1.641	3.38564	0.649444	0.182463	0.529814	0.0429382	7.04969	0.214956	5.49	0.434866	24.2547	548.594	1.06666	1.61223	7.04969	0.771504	0.100729	0.396469	1.06e-06	10	603	l
769	204	45	7.6372	0.682163	6.08341	9.39664	84.0825	148.781	18.1314	0.498204	-1.37662	0.0723985	1.96599	0.790595	5.69422	0.618916	26.3633	655.533	1.09032	1.42344	1.96599	0.564966	0.290285	0.619106	0.0635238	6.30409	0.421986	6.45323	0.501037	26.1871	647.382	1.05004	1.4601	6.30409	0.754483	0.114517	0.403141	9.83e-07	8	706	l
770	270	74	9.21484	2.06803	5.43754	13.8242	198.104	154.994	23.6982	0.575054	0.769717	0.02335	3.11404	0.864133	12.4599	0.493619	24.1721	564.473	1.33033	1.79585	3.11404	0.635535	0.287107	0.672531	0.0181508	10.2409	0.586266	13.3762	0.331509	23.65	538.384	1.30899	1.87927	10.2409	0.85271	0.150354	0.513092	1.19e-06	12	2151	l
771	199	45	7.46394	0.69374	5.33204	8.49232	779.519	155.741	17.7338	0.438085	1.05174	0.0431879	2.63305	0.745187	6.16664	0.557574	25.9244	630.823	1.16979	1.6015	2.63305	0.611834	0.232418	0.586272	0.0300454	6.49405	0.389771	6.32099	0.420787	25.7083	619.761	1.11217	1.67571	6.49405	0.761449	0.124628	0.446834	7.42e-07	8	475	l
772	193	42	7.41237	0.478719	6.17746	8.15732	769.211	165.167	17.1078	0.291857	1.06573	0.0345697	3.2147	0.76858	7.94558	0.535506	24.2867	556.034	1.2332	1.6816	3.2147	0.643113	0.249611	0.617228	0.0316194	7.28767	0.354455	6.64459	0.39472	23.4795	515.193	1.12096	1.66895	7.28767	0.760256	0.120879	0.439581	7.98e-07	9	475	l
773	183	51	7.35113	1.50535	3.66604	10.3065	14.1875	166.072	18.2053	0.612508	-0.914129	0.0450714	1.4649	0.810246	4.85999	0.622144	28.5195	764.745	1.11931	1.47312	1.4649	0.501679	0.266987	0.604029	0.030881	3.26866	0.566881	4.77339	0.44739	27.8955	729.892	1.09874	1.58585	3.26866	0.617099	0.132042	0.448157	5.23e-07	4	2367	l
774	341	72	10.3568	3.11328	4.42094	14.5961	201.15	175.187	34.154	0.886177	-0.961427	0.0182025	2.89104	0.885085	13.579	0.537558	23.4931	536.62	1.37539	1.86014	2.89104	0.624924	0.300173	0.693958	0.0129811	9.8363	0.61857	13.894	0.358693	22.6833	497.02	1.34596	2.00107	9.8363	0.844252	0.150466	0.52716	1.21e-06	12	2151	l
775	151	39	6.5171	0.869251	4.97971	7.84971	21.9602	177.713	16.9492	0.667013	1.36246	0.0307157	2.99625	0.767868	7.45377	0.5081	26.0694	640.115	1.22398	1.68121	2.99625	0.628178	0.232239	0.597564	0.0240951	7.29661	0.439322	7.50695	0.352763	25.6017	615.011	1.18285	1.73886	7.29661	0.776794	0.141652	0.482558	5.82e-07	4	2367	l
776	249	54	8.57727	1.2273	6.60094	10.8806	516.308	180.38	21.698	0.629522	-1.00871	0.041665	3.05463	0.787129	8.17483	0.53766	25.0435	594.26	1.19781	1.64407	3.05463	0.63943	0.227732	0.587031	0.0378821	8.70098	0.384493	8.06814	0.419037	24.4559	563.482	1.134	1.69657	8.70098	0.824929	0.0991084	0.402673	1.06e-06	8	4026	l
777	242	55	8.33008	1.60109	4.23308	11.5692	564.05	180.582	21.8733	0.628968	0.331101	0.0414077	2.71034	0.843963	9.68493	0.562443	24.1931	557.993	1.25921	1.70671	2.71034	0.618514	0.280258	0.65319	0.0300575	8.12183	0.526829	9.58234	0.412609	23.5431	525.026	1.20891	1.78269	8.12183	0.811581	0.141001	0.486771	1.07e-06	10	4026	l
778	214	48	7.83803	0.730499	6.52323	9.75162	629.23	183.834	19.5651	0.531963	-1.2177	0.0210172	3.88327	0.821109	11.8537	0.476694	22.69	495.138	1.34507	1.83739	3.88327	0.674737	0.280703	0.671692	0.0168779	9.96364	0.466643	10.3405	0.330011	21.2727	427.505	1.27005	1.89477	9.96364	0.839069	0.150204	0.514658	1.03e-06	8	9498	l
779	210	50	7.82266	1.14334	5.44783	10.1547	479.553	186.958	19.7061	0.61836	0.924946	0.0331134	2.70573	0.786274	7.32988	0.540916	25.0067	587.236	1.24489	1.65326	2.70573	0.616247	0.267408	0.632219	0.0272664	7.3	0.45394	7.68425	0.373076	24.5353	563.497	1.21019	1.72006	7.3	0.769057	0.163591	0.513758	1.01e-06	8	496	l
780	107	32	5.35892	0.301019	4.9375	5.86335	145.078	185.906	12.1477	0.200691	-0.000790297	0.0511656	1.77957	0.647149	3.5217	0.58327	29.1774	799.812	1.04373	1.42406	1.77957	0.538244	0.183617	0.500175	0.0442739	3.5974	0.182875	3.20126	0.437051	28.5584	769.225	0.91757	1.4195	3.5974	0.617565	0.0840275	0.342154	1.25e-06	13	157	l
781	219	45	7.91354	0.437826	6.62703	8.78545	534.686	190.286	17.9983	0.401754	0.0545398	0.0374052	2.77736	0.652806	4.99972	0.539652	25.8943	625.691	1.14622	1.61367	2.77736	0.608931	0.16564	0.502792	0.0236209	7.8984	0.204025	5.96146	0.350427	25.7594	619.398	1.11285	1.75104	7.8984	0.786589	0.0812644	0.37128	1.07e-06	7	4026	l
782	215	46	7.89537	0.948661	6.39312	9.76029	493.828	193.645	20.0829	0.614852	1.43094	0.0284668	3.94974	0.787617	10.2986	0.498551	20.759	412.395	1.28724	1.76433	3.94974	0.676101	0.251558	0.630963	0.0233245	10.5398	0.459438	10.7489	0.35719	20.2898	392.69	1.20484	1.75841	10.5398	0.842894	0.133767	0.472033	1.03e-06	10	496	l
783	381	65	10.6121	1.67896	7.04899	13.7588	566.923	196.291	28.2653	0.712811	-0.33264	0.0277464	2.61178	0.863826	10.5898	0.579163	23.2619	517.308	1.3174	1.76269	2.61178	0.603874	0.313016	0.692896	0.0200328	7.58514	0.591561	10.2855	0.422591	22.5759	482.919	1.28355	1.89951	7.58514	0.789295	0.158363	0.527907	1.07e-06	9	4026	l
784	204	48	7.62402	1.05622	5.66498	9.66568	152	211.234	20.1444	0.711968	-1.43398	0.053018	1.7708	0.839565	6.51877	0.600041	26.382	656.926	1.15063	1.52688	1.7708	0.541659	0.283147	0.629022	0.0377424	5.14744	0.509767	6.24999	0.426889	25.6603	618.559	1.11018	1.63158	5.14744	0.705337	0.121903	0.436895	1.27e-06	14	938	l
785	184	46	7.21755	0.772601	5.04816	8.99065	138.57	209.97	16.9252	0.477262	0.732887	0.0470753	1.5084	0.765341	4.21402	0.617818	27.8473	725.253	1.12833	1.4713	1.5084	0.508015	0.264742	0.601412	0.0315778	4	0.406027	4.36716	0.43583	27.7733	722.052	1.07907	1.61221	4	0.673315	0.118852	0.429314	1.25e-06	13	938	l
786	246	48	8.41582	0.55784	7.18131	9.50375	612.661	211.128	19.477	0.463339	-0.000710168	0.0426914	2.55791	0.676077	4.94833	0.549898	26.7339	669.015	1.12566	1.57268	2.55791	0.600977	0.173834	0.508668	0.0313504	7.0878	0.158513	5.21148	0.377866	26.3463	648.995	1.06321	1.6355	7.0878	0.767751	0.0409635	0.257119	1.02e-06	8	4026	l
787	229	46	8.1729	0.856426	6.17257	10.2285	475.784	217.842	19.3729	0.46491	0.426961	0.0290771	3.54513	0.715	7.21952	0.503123	23.9471	537.325	1.23159	1.72708	3.54513	0.661035	0.194035	0.556811	0.0259802	8.5615	0.282022	6.96223	0.345482	23.3209	506.417	1.15942	1.7582	8.5615	0.798969	0.0679968	0.341186	1e-06	7	4026	l
788	137	35	6.18173	0.509598	5.10022	7.01718	236.655	217.98	15.2462	0.548909	-0.577541	0.0413223	3.38636	0.706411	6.76719	0.52221	25.8657	629.353	1.1742	1.62819	3.38636	0.653911	0.203017	0.554806	0.0315193	7.49524	0.293745	6.30633	0.367822	25.0571	587.167	1.11059	1.64783	7.49524	0.773999	0.111976	0.42136	1.12e-06	9	190	l
789	164	39	6.78667	0.608067	5.66202	7.96351	165.157	219.532	16.1193	0.421749	1.07908	0.0315423	2.61433	0.795967	7.40666	0.526456	26.7235	673.539	1.21813	1.61962	2.61433	0.605637	0.281369	0.641547	0.0263441	8.21053	0.415036	8.01798	0.369388	26.1353	643.879	1.15499	1.659	8.21053	0.812402	0.133968	0.460395	1.29e-06	12	938	l
790	174	41	7.02783	0.653897	5.65354	8.47156	133.499	223.629	16.4763	0.460588	-1.37894	0.0438129	2.42926	0.755179	5.9613	0.548903	25.5354	610.549	1.18105	1.59763	2.42926	0.594231	0.248174	0.603378	0.02857	6.46763	0.359458	6.04856	0.412446	25	583.827	1.12322	1.68963	6.46763	0.763782	0.0981291	0.400003	1.24e-06	12	938	l
791	210	54	7.9079	1.70131	5.08596	11.1212	750.685	225.766	21.4757	0.740131	1.55516	0.0487602	2.79004	0.789554	7.62889	0.542497	25.0511	592.758	1.19674	1.60943	2.79004	0.622111	0.263327	0.62144	0.0395386	7.04294	0.424553	7.11954	0.434681	24.4294	559.999	1.13645	1.64021	7.04294	0.785638	0.125887	0.444705	9.07e-07	8	1654	l
792	191	46	7.36832	0.765419	6.00291	9.03328	493.752	232.545	17.9835	0.531246	1.4378	0.0370867	3.56642	0.70925	7.13315	0.515481	23.8613	534.812	1.19315	1.65938	3.56642	0.661353	0.196374	0.550687	0.0291556	8.28	0.287904	6.81382	0.398058	23.1067	498.287	1.12233	1.70109	8.28	0.812422	0.103524	0.411694	1.04e-06	9	4026	l
793	170	42	6.89982	0.472794	5.94237	7.75072	762.942	232.523	16.0053	0.344558	-1.40884	0.0254387	2.64851	0.7868	7.21133	0.521565	26.9026	679.791	1.25904	1.70688	2.64851	0.601304	0.258125	0.630098	0.0241393	6.44361	0.406103	6.42485	0.374733	26.1729	640.678	1.16449	1.70346	6.44361	0.759167	0.130924	0.460768	8.76e-07	8	1654	l
794	279	53	8.95051	0.770716	6.93039	10.3501	26.3125	238.008	21.7305	0.514703	-0.0455877	0.0413809	2.97754	0.781277	7.80665	0.533189	23.4463	519.054	1.20207	1.63283	2.97754	0.627996	0.24021	0.599719	0.0325642	7.28194	0.377764	6.85143	0.38152	22.3568	466.341	1.13851	1.69234	7.28194	0.773843	0.0929084	0.389891	6.33e-07	4	346	l
795	372	68	11.1253	2.98181	5.7624	16.394	269.37	244.09	32.9898	0.863108	-1.03779	0.0236499	1.94505	0.878699	9.01745	0.586188	26.5267	665.195	1.32614	1.74298	1.94505	0.550225	0.32184	0.698245	0.0160892	5.65409	0.675492	9.71178	0.413326	26.2893	652.967	1.31385	1.9092	5.65409	0.738955	0.172203	0.549678	9.8e-07	8	1582	l
796	203	43	7.59681	0.46827	6.56094	8.47291	553.728	239.943	18.6553	0.472563	-1.41636	0.025755	5.07483	0.785291	12.8179	0.472388	21.7687	459.46	1.34168	1.82934	5.07483	0.731451	0.269686	0.65925	0.0185803	13.0964	0.435764	12.6054	0.345544	21	422.064	1.28353	1.83766	13.0964	0.891528	0.149092	0.506212	1.07e-06	5	247	l
797	185	43	7.22874	0.647431	5.70806	8.57935	254.058	242.432	16.9739	0.394692	-0.966204	0.0497371	2.47885	0.785375	6.77485	0.576842	25.7598	625.295	1.16968	1.56358	2.47885	0.604123	0.25733	0.608138	0.0362624	7.25974	0.411338	7.1663	0.422915	25.4805	609.634	1.14476	1.67613	7.25974	0.785626	0.097549	0.397401	1.05e-06	9	1582	l
798	189	43	7.33323	0.568552	6.27976	8.53818	765.464	248.283	17.8835	0.504301	-1.57047	0.0315102	3.15611	0.787038	8.41005	0.523753	22.9116	495.712	1.24997	1.68006	3.15611	0.644039	0.270364	0.639203	0.0262053	8.72973	0.409652	8.39372	0.394637	22.2162	463.459	1.17784	1.69106	8.72973	0.815216	0.148589	0.487564	8.81e-07	10	1654	l
799	221	46	8.04211	1.08838	6.17575	10.0503	240.145	252.44	21.1024	0.705403	-0.753291	0.0322617	2.55125	0.840401	8.99267	0.547338	25.8912	635.707	1.26833	1.69752	2.55125	0.602973	0.286798	0.658435	0.0224712	6.68715	0.557367	8.55383	0.361317	25.1899	597.294	1.23653	1.79801	6.68715	0.759679	0.145744	0.496199	1.12e-06	9	1582	l
800	236	46	8.26408	0.505494	7.31537	9.61845	822.977	256.418	19.5341	0.400042	1.27348	0.0227184	3.47674	0.828236	11.1207	0.498307	23.207	515.344	1.33603	1.80973	3.47674	0.655242	0.281911	0.669199	0.0191672	10.3366	0.530538	12.009	0.35135	23.1659	512.209	1.291	1.84807	10.3366	0.850708	0.175002	0.546284	5.6e-07	5	564	l
801	219	50	7.90872	0.933058	5.64815	9.7643	172.396	256.778	19.6054	0.492496	-1.35709	0.0263633	3.43489	0.815305	10.2988	0.502005	22.3704	477.115	1.31443	1.77993	3.43489	0.653109	0.271196	0.654136	0.0172535	10.4432	0.495028	11.3404	0.331967	21.9784	458.781	1.29354	1.88114	10.4432	0.851581	0.155039	0.520629	1.29e-06	13	3015	l
802	230	49	8.1055	0.681332	6.71581	9.71534	488.881	256.903	19.5496	0.447254	1.13549	0.0253106	3.06938	0.835251	10.3153	0.506085	24.2799	562.523	1.29446	1.74227	3.06938	0.633765	0.289516	0.667501	0.0195617	8.03784	0.552126	9.97333	0.356099	23.573	525.519	1.26459	1.83739	8.03784	0.805094	0.133585	0.480905	1.05e-06	11	1516	l
803	208	54	7.61084	1.57441	4.29729	10.1755	755.241	259.705	18.2184	0.429935	1.38017	0.07165	1.62636	0.661121	3.39961	0.642767	29.2432	805.368	1.005	1.35006	1.62636	0.52874	0.206345	0.516732	0.0584818	3.93413	0.27221	3.7028	0.529536	29.0958	796.654	0.992837	1.46263	3.93413	0.672151	0.0852309	0.349412	9.21e-07	10	1654	l
804	233	47	8.26674	1.43508	6.04289	10.7518	249.579	270.093	23.1866	0.766923	-1.21753	0.0276662	4.49941	0.760255	10.3837	0.498729	22.2704	473.091	1.29286	1.78902	4.49941	0.707675	0.232111	0.612254	0.0225592	12.1878	0.379951	10.8281	0.367974	21.6701	443.965	1.25339	1.82956	12.1878	0.878301	0.129429	0.472941	1.08e-06	11	1582	l
805	238	48	8.3103	0.844262	6.44505	10.2468	164.279	271.275	20.4984	0.561951	-0.604188	0.0339363	2.12486	0.858858	8.52735	0.562095	24.5434	570.542	1.25049	1.63945	2.12486	0.566091	0.311885	0.67406	0.0290062	6.58065	0.496541	7.53544	0.389796	23.5269	518.635	1.18692	1.70384	6.58065	0.757139	0.1469	0.486542	1.28e-06	13	3015	l
806	229	48	8.27927	1.30175	6.00943	11.2356	228.622	273.322	23.1728	0.759017	-1.03799	0.0197772	3.8747	0.839377	13.0615	0.473708	22.5807	494.488	1.36476	1.87748	3.8747	0.675183	0.271025	0.667008	0.0156631	11.0635	0.550483	13.306	0.329932	21.6243	450.161	1.32654	1.93869	11.0635	0.871469	0.164377	0.541614	1.17e-06	10	1582	l
807	185	43	7.21758	0.555761	6.07262	8.49309	477.011	271.044	17.4319	0.47215	-0.496271	0.0313291	3.27669	0.778279	8.38923	0.517717	23.391	516.626	1.24722	1.6814	3.27669	0.650117	0.260023	0.628495	0.026717	7.9863	0.396741	7.6193	0.37542	22.4247	470.3	1.16885	1.71132	7.9863	0.796138	0.138629	0.474355	1.04e-06	9	1516	l
808	212	44	7.77421	0.550286	6.97786	9.12587	822.943	274.182	18.5378	0.499779	-1.46218	0.049069	1.90897	0.816639	6.20549	0.591219	27.6619	721.493	1.15567	1.50918	1.90897	0.556451	0.30867	0.650801	0.0419147	5.03571	0.501679	6.05269	0.45387	27.0595	688.382	1.1133	1.54698	5.03571	0.719979	0.136288	0.449982	5.71e-07	6	564	l
809	200	48	7.47899	0.807942	4.37029	8.66839	615.475	274.333	17.3798	0.322688	1.32724	0.0401399	2.40979	0.799936	7.02254	0.583208	25.2322	598.903	1.20671	1.63366	2.40979	0.595487	0.263296	0.625013	0.0337305	6.8625	0.40647	6.78109	0.435517	24.775	574.242	1.15341	1.68537	6.8625	0.774474	0.145873	0.482641	1.01e-06	7	1128	l
810	295	63	9.25067	1.49574	5.60589	11.9422	77.175	284.018	22.5656	0.508535	1.0662	0.0421567	2.7395	0.812932	8.32218	0.56675	24.3231	561.165	1.2013	1.6169	2.7395	0.617664	0.267812	0.627259	0.0366415	7.06695	0.505024	8.13867	0.43933	23.5272	522.494	1.14402	1.64448	7.06695	0.772191	0.126685	0.446566	1.01e-06	9	2564	l
811	181	45	7.1516	0.981466	4.67644	8.58048	487.287	281.786	17.3544	0.550891	-0.340066	0.0389091	1.56522	0.778853	4.53887	0.599708	28.8075	778.824	1.12653	1.50271	1.56522	0.50736	0.241448	0.581465	0.0308384	3.57143	0.473789	4.39354	0.438814	28.3083	751.991	1.06881	1.59071	3.57143	0.63141	0.115443	0.420798	1.07e-06	11	1516	l
812	262	55	8.84415	1.0103	7.15137	10.7101	790.234	281.995	21.6901	0.573156	-0.208556	0.034634	2.59201	0.830615	8.65122	0.569571	24.3123	558.689	1.27589	1.66522	2.59201	0.608164	0.321819	0.687025	0.0250722	6.07512	0.55993	7.90244	0.410951	23.6432	524.757	1.21058	1.73834	6.07512	0.747247	0.186715	0.548566	7.92e-07	12	1535	l
813	281	54	9.00211	0.860302	6.9081	10.5172	45.1424	284.76	21.8701	0.588496	-0.227758	0.0449866	2.03201	0.734111	4.82116	0.585674	26.4219	653.165	1.12543	1.51387	2.03201	0.559753	0.220539	0.559357	0.0299913	5.33333	0.366713	5.21083	0.426416	26.2	641.895	1.09252	1.65298	5.33333	0.729897	0.0808247	0.360514	8.07e-07	7	449	l
814	383	63	10.7712	1.06269	8.53162	13.1871	769.473	289.32	26.4277	0.591701	-0.867799	0.036949	2.40932	0.86215	9.73893	0.573074	23.6062	531.296	1.27351	1.69585	2.40932	0.596523	0.300356	0.671449	0.0323654	6.375	0.621052	9.41145	0.449485	23.1128	506.538	1.22064	1.75938	6.375	0.767327	0.174264	0.534113	8.96e-07	12	1535	l
815	216	45	7.85984	0.501548	6.84058	8.76573	615.721	290.76	18.3573	0.394079	-0.344594	0.0364621	2.41507	0.812882	7.45333	0.558664	24.3078	556.167	1.226	1.6333	2.41507	0.592912	0.276446	0.638606	0.0404082	6.23429	0.461386	6.78734	0.44761	23.7086	526.795	1.12806	1.65195	6.23429	0.767348	0.154922	0.492196	1.03e-06	7	1128	l
816	246	51	8.4575	0.863698	7.15783	10.721	179.385	297.787	21.0455	0.597994	1.11555	0.0412078	2.72067	0.775934	7.07113	0.571589	23.7799	530.86	1.2123	1.61666	2.72067	0.610847	0.265365	0.624664	0.0397	6.74	0.412357	6.73477	0.446614	22.97	493.153	1.13074	1.62367	6.74	0.75824	0.116925	0.427326	1.27e-06	12	3015	l
817	222	64	8.325	2.61802	2.5427	13.7328	493.289	296.681	21.6403	0.633959	0.112341	0.0339481	2.69948	0.77339	6.95624	0.529623	26.487	659.969	1.21169	1.65704	2.69948	0.613821	0.230092	0.591639	0.0255456	6.80952	0.426768	6.93959	0.404644	26.0595	637.313	1.15242	1.75035	6.80952	0.77784	0.134206	0.471809	1.1e-06	11	1516	l
818	179	41	7.10966	0.690762	5.68481	8.49677	464.809	296.822	17.8758	0.580027	-0.77018	0.0307522	3.37129	0.7682	8.27198	0.510693	22.4041	473.211	1.25	1.68989	3.37129	0.644516	0.266363	0.636438	0.0274654	6.47059	0.364857	6.0938	0.365301	21.1912	416.134	1.13552	1.68142	6.47059	0.747656	0.103076	0.408666	1.04e-06	10	426	l
819	267	54	8.81207	0.875463	7.3199	10.8742	750.962	297.976	22.1631	0.548033	-0.407623	0.0174532	3.59053	0.871569	14.9785	0.483429	23.2119	528.139	1.39875	1.89858	3.59053	0.66428	0.301194	0.699957	0.016625	9.99515	0.587155	13.1052	0.3242	21.6359	450.869	1.32722	1.94697	9.99515	0.834405	0.164453	0.542694	9.57e-07	10	1535	l
820	268	59	8.80463	1.54056	4.95437	11.1926	163.951	303.778	24.1313	0.718305	-1.47244	0.0230715	3.03505	0.853591	11.365	0.509768	22.1567	471.925	1.33603	1.79722	3.03505	0.629202	0.298565	0.683963	0.0163899	9.04525	0.557294	11.2159	0.34264	21.3167	432.842	1.29117	1.91666	9.04525	0.830459	0.157598	0.528739	1.27e-06	12	3015	l
821	100	33	5.25553	0.796675	3.88305	6.85693	619.097	304.029	13.4525	0.656643	0.971506	0.109343	0.944282	0.612366	2.21801	0.700293	30.8152	900.661	0.869745	1.11002	0.944282	0.439862	0.204008	0.472115	0.0796469	1.77465	0.283403	2.23825	0.569014	30.5352	886.44	0.815491	1.15492	1.77465	0.528772	0.126628	0.380202	1.04e-06	7	1128	l
822	217	46	7.87151	0.57196	6.90897	9.2334	574.305	306.695	18.6432	0.409909	-0.409646	0.0284099	3.25064	0.805595	9.36045	0.502675	23.5891	527.281	1.29355	1.76117	3.25064	0.643583	0.258125	0.63769	0.0211629	9.55495	0.42773	9.34829	0.353959	23.0495	499.044	1.25024	1.86054	9.55495	0.839759	0.113614	0.448081	1.12e-06	11	639	l
823	220	45	7.94438	0.541574	7.08945	9.21076	806.122	307.323	19.0474	0.439982	-0.404681	0.0283106	4.23905	0.806989	11.9814	0.485502	22.9099	505.709	1.32234	1.81834	4.23905	0.694246	0.266708	0.654642	0.0260201	10.4375	0.4664	10.7803	0.362863	21.9375	455.922	1.26775	1.78192	10.4375	0.849439	0.146642	0.495693	7.04e-07	7	269	l
824	163	39	6.76301	0.592524	5.52039	8.02482	470.206	308.801	16.005	0.419016	-0.952394	0.0478954	2.98103	0.714298	6.21703	0.563085	24.4121	558.847	1.15352	1.55402	2.98103	0.622931	0.217711	0.562052	0.0410156	7.625	0.320268	6.60883	0.443944	24.0469	542.133	1.08337	1.59332	7.625	0.768628	0.102717	0.39807	1.07e-06	11	426	l
825	240	50	8.31426	0.8988	6.34391	10.072	784.29	312.079	20.474	0.617656	-0.758633	0.0314081	2.28473	0.746227	5.50152	0.57589	27.1504	689.034	1.20214	1.65128	2.28473	0.578616	0.229495	0.59012	0.0230208	5.54404	0.367124	5.38004	0.430098	26.6218	661.326	1.13941	1.73731	5.54404	0.715246	0.112453	0.432417	8.39e-07	9	1535	l
826	137	39	6.31295	1.1103	4.89804	8.47416	559.558	313.57	16.9516	0.724555	-0.695128	0.0622183	3.04	0.713307	6.30185	0.554124	24.6905	574.28	1.10849	1.51533	3.04	0.639778	0.225561	0.565437	0.0582949	7.40196	0.231633	5.81668	0.45176	23.9118	535.816	1.02178	1.43748	7.40196	0.772667	0.093867	0.363333	1.15e-06	8	639	l
827	205	45	7.68606	1.10043	5.5219	9.6599	199.28	318.391	20.251	0.689109	1.10695	0.0225728	2.73478	0.811083	8.23804	0.509574	25.3194	604.016	1.28192	1.74949	2.73478	0.607416	0.260819	0.638971	0.0204714	6.85065	0.410104	6.80666	0.366177	23.9156	532.914	1.18811	1.79984	6.85065	0.774688	0.112585	0.439585	1.24e-06	12	1479	l
828	274	57	8.93025	1.37857	6.1387	11.2632	169.897	322.675	23.5169	0.6615	1.25107	0.024285	3.31864	0.821113	10.2758	0.486963	22.6032	487.837	1.2947	1.79485	3.31864	0.648664	0.24378	0.626441	0.0187241	9.60268	0.446092	9.66812	0.324912	21.6027	440.144	1.22931	1.8758	9.60268	0.836086	0.110999	0.444791	1.26e-06	11	3015	l
829	158	41	6.67797	0.793802	4.97495	8.268	546.753	319.292	16.2328	0.497269	-0.472893	0.0512985	2.99283	0.732539	6.59489	0.571458	23.7061	527.167	1.17212	1.56177	2.99283	0.627419	0.258171	0.608758	0.0354484	7.06612	0.371066	6.61753	0.442959	23.1322	500.842	1.09958	1.59836	7.06612	0.76681	0.146917	0.473156	1.17e-06	10	639	l
830	193	42	7.38685	0.362889	6.25398	8.10455	609.321	318.9	17.0938	0.375885	-0.0335698	0.0468312	2.2769	0.781239	6.20409	0.56236	26.1736	643.075	1.18289	1.56741	2.2769	0.584546	0.269458	0.621464	0.0488241	5.74194	0.403619	5.81399	0.44238	25.5226	609.863	1.10233	1.56583	5.74194	0.745193	0.130242	0.442707	1.08e-06	9	248	l
831	188	44	7.28537	0.664803	5.97187	8.76613	731.418	320.907	18.0171	0.546542	-0.000569232	0.0312472	3.12444	0.772828	7.87682	0.50806	25.2163	599.48	1.23511	1.68505	3.12444	0.636961	0.249817	0.617949	0.0298889	7.47333	0.442543	7.70306	0.380126	24.6333	569.982	1.16755	1.69488	7.47333	0.789776	0.150999	0.491745	1e-06	11	8929	l
832	298	58	9.33657	1.00889	7.40226	11.6545	95.4701	323.54	21.5572	0.482847	0.743799	0.029878	2.24404	0.722504	5.04337	0.547797	28.145	742.121	1.15993	1.61417	2.24404	0.576449	0.191005	0.537445	0.0206527	6.52632	0.273503	5.49163	0.373185	27.6275	714.177	1.11836	1.75295	6.52632	0.764404	0.055143	0.307608	1.12e-06	9	2564	l
833	183	45	7.19084	0.740689	5.55667	8.81217	748.033	324.886	17.1717	0.497532	0.575863	0.0495205	1.63859	0.818946	5.52514	0.615584	28.2083	748.311	1.15557	1.4815	1.63859	0.530654	0.320273	0.656973	0.0432431	4.01439	0.479778	4.85834	0.481175	27.3957	704.073	1.07736	1.53489	4.01439	0.687018	0.139339	0.453184	9.78e-07	11	8929	l
834	187	45	7.25067	0.816921	5.81229	8.70533	209.976	330.433	18.0279	0.511556	-1.36427	0.0199881	3.9955	0.812773	11.6702	0.460785	25.2009	609.077	1.31801	1.82073	3.9955	0.683212	0.264596	0.652724	0.0168461	11.2819	0.480614	11.8608	0.317586	24.4094	567.12	1.28022	1.86758	11.2819	0.866821	0.151489	0.513507	1.22e-06	11	1479	l
835	292	51	9.30475	1.05515	7.04708	11.1044	58.3042	334.147	23.8643	0.664804	0.912604	0.0443728	3.10801	0.791668	8.45928	0.526571	22.9088	497.443	1.2128	1.65579	3.10801	0.636733	0.247904	0.611633	0.0289768	8.08678	0.403328	7.77656	0.380314	22.1612	459.914	1.16366	1.7714	8.08678	0.806715	0.090125	0.392369	9.46e-07	10	815	l
836	252	52	8.48297	0.563296	7.12733	9.67703	747.935	339.941	19.7703	0.329427	0.603595	0.0423107	2.69532	0.838676	9.35376	0.557885	23.7095	535.02	1.25284	1.66839	2.69532	0.61733	0.298626	0.665784	0.0296065	6.77157	0.518733	8.03515	0.404023	22.5888	479.254	1.19059	1.71094	6.77157	0.770845	0.128325	0.457296	9.85e-07	12	8929	l
837	230	46	8.13078	0.632007	6.98692	9.45652	529.168	343.766	20.0451	0.553488	-0.0680975	0.0253094	3.4313	0.790858	9.20327	0.509473	23.0729	502.647	1.31822	1.79353	3.4313	0.653277	0.265027	0.64951	0.0189454	8.29412	0.453866	8.59348	0.358256	22.4011	469.337	1.25262	1.83856	8.29412	0.801542	0.139596	0.491042	1.22e-06	8	295	l
838	142	36	6.28402	0.524334	4.87197	7.02871	230.33	345.789	15.2195	0.500776	-1.09831	0.0228786	3.50099	0.752223	8.0648	0.496811	26.7614	674.769	1.26613	1.75869	3.50099	0.646877	0.228444	0.603858	0.0210477	7.0463	0.447927	7.38167	0.370219	26.1019	639.379	1.18401	1.75847	7.0463	0.758198	0.141362	0.484458	1.17e-06	10	1479	l
839	233	48	8.19537	0.90159	6.21843	9.90802	97.4709	354.817	20.8494	0.610822	-0.295823	0.0297146	3.50059	0.786998	9.21726	0.496718	23.4439	520.171	1.28986	1.75305	3.50059	0.653136	0.253764	0.631829	0.0256432	9.2328	0.433975	9.15583	0.36595	22.7566	486.037	1.24739	1.80495	9.2328	0.83617	0.11948	0.452721	1.15e-06	11	324	l
840	209	48	7.71565	0.776981	6.16191	9.08355	741.446	355.968	19.3073	0.573474	1.43725	0.0318203	2.72606	0.81302	8.28974	0.509812	23.9229	539.446	1.27307	1.7164	2.72606	0.604721	0.27584	0.650067	0.0276825	6.56173	0.471309	7.20564	0.367497	22.9321	490.963	1.19038	1.76399	6.56173	0.764705	0.143012	0.487767	1.01e-06	9	8929	l
841	277	52	8.95719	0.673261	7.47998	10.5187	201.043	356.589	21.7465	0.47532	0.176958	0.0214753	3.41732	0.836301	11.4378	0.498275	22.685	493.073	1.36042	1.85331	3.41732	0.657668	0.279153	0.672228	0.0177872	9.10619	0.517945	10.4452	0.364618	21.6637	443.361	1.29986	1.91259	9.10619	0.828444	0.148714	0.514348	1.24e-06	10	353	l
842	182	44	7.30002	1.50823	4.34097	10.2482	13.4645	359.086	20.987	0.803268	-1.28904	0.0291618	2.58398	0.80563	7.64705	0.535368	26.6733	670.861	1.23997	1.66327	2.58398	0.606437	0.26767	0.633956	0.0234329	7.58451	0.403183	7.35413	0.362768	25.9225	629.319	1.19427	1.74476	7.58451	0.795643	0.111227	0.430993	6.44e-07	5	1210	l
843	214	46	7.81953	0.927949	6.21834	9.31656	69.2158	358.183	20.302	0.664511	-1.45155	0.0419679	2.90323	0.813215	8.77157	0.552802	24.4129	565.887	1.22445	1.66592	2.90323	0.632119	0.275822	0.642777	0.04	8.45143	0.457402	8.78793	0.423963	23.5829	524.17	1.18935	1.70313	8.45143	0.807913	0.15338	0.49641	1.03e-06	12	538	l
844	258	52	8.70782	1.05822	7.00934	11.0059	726.917	362.254	21.7081	0.621994	-0.822951	0.055563	2.04463	0.814759	6.51884	0.616427	25.9426	634.16	1.16098	1.52808	2.04463	0.568432	0.282807	0.628873	0.0480991	4.62802	0.488224	5.52153	0.499912	25.3043	599.896	1.08786	1.55668	4.62802	0.711206	0.126656	0.435677	1.03e-06	9	8929	l
845	260	50	8.76081	1.17398	6.39766	10.8227	144.115	370.302	23.4609	0.693555	-0.76594	0.0332842	4.20316	0.827286	13.168	0.495802	21.8895	467.365	1.32503	1.8065	4.20316	0.696443	0.261733	0.647754	0.036757	11.1546	0.484741	11.8242	0.382166	20.5362	403.94	1.25418	1.79734	11.1546	0.864396	0.163458	0.523265	1.24e-06	9	331	l
846	235	47	8.19149	0.375196	7.12153	8.94743	669.073	372.15	18.4	0.369994	-0.946741	0.042233	3.36989	0.599092	5.20282	0.516715	26.6488	665.565	1.11206	1.59119	3.36989	0.654059	0.134159	0.452249	0.0361969	6.96335	0.144461	5.06957	0.382389	26.3141	648.475	1.03252	1.57637	6.96335	0.774766	0.03562	0.235722	1.1e-06	7	296	l
847	218	48	7.82593	0.868273	5.03331	9.47589	110.15	374.116	19.1543	0.558619	1.40845	0.0577556	2.50953	0.705991	5.26777	0.587908	24.5781	564.378	1.12999	1.52405	2.50953	0.598778	0.24001	0.583182	0.049936	5.72626	0.3321	5.28677	0.475931	24.0615	539.968	1.0713	1.54424	5.72626	0.74326	0.133808	0.445692	1.19e-06	9	532	l
848	323	57	9.74704	1.04434	8.14406	11.9447	228.568	377.334	25.4602	0.651969	-0.535375	0.0257913	3.47735	0.852866	12.817	0.524738	21.9253	466.65	1.36179	1.83231	3.47735	0.659992	0.304874	0.694752	0.0183872	11.007	0.559825	13.503	0.371859	21.5544	447.383	1.34603	1.9434	11.007	0.866591	0.165849	0.544368	1.2e-06	10	407	l
849	205	44	7.65741	0.721506	6.12394	9.20735	774.622	377.359	18.8322	0.500762	0.828244	0.0271344	4.05263	0.791967	10.7403	0.474956	22.9055	501.74	1.29926	1.792	4.05263	0.687666	0.249068	0.631979	0.0220479	11.3049	0.411729	10.6086	0.352527	22.1707	465.593	1.2312	1.83191	11.3049	0.875644	0.148147	0.504039	8.92e-07	10	1501	l
850	210	48	7.70288	0.689928	6.49375	9.40977	95.8429	378.557	19.0728	0.465108	-1.38252	0.0276544	4.15079	0.795968	11.1719	0.502048	19.7937	377.531	1.32762	1.81395	4.15079	0.686972	0.261606	0.648622	0.0208163	12.1943	0.444311	11.9722	0.369383	19.4171	360.578	1.28199	1.88444	12.1943	0.888432	0.155452	0.521657	1.16e-06	10	532	l
851	207	52	7.75193	1.09819	5.8301	10.0264	791.521	380.605	19.7255	0.613953	-0.504468	0.0231068	2.71816	0.852492	10.2136	0.510016	26.5068	669.213	1.30604	1.77101	2.71816	0.610288	0.281309	0.663294	0.0268389	7.85119	0.592137	10.6248	0.387509	26.1131	648.539	1.25569	1.78742	7.85119	0.80845	0.147823	0.498216	7.98e-07	8	1501	l
852	176	40	7.05874	0.773275	5.72505	8.47504	197.104	392.03	18.0322	0.615443	1.36348	0.0208225	3.60443	0.805199	10.2516	0.449386	24.443	568.239	1.31649	1.80769	3.60443	0.650892	0.253391	0.638868	0.0168306	11.6806	0.424627	11.1504	0.286598	23.9028	541.2	1.2692	1.89119	11.6806	0.865542	0.133676	0.487153	1.26e-06	11	3504	l
853	129	33	6.00896	0.529011	5.21423	7.30548	698.979	389.797	14.5589	0.566366	-0.563007	0.0913951	0.757709	0.696915	2.25	0.703084	20.9956	408.387	0.892236	1.12546	0.757709	0.388612	0.238974	0.51304	0.0678005	1.78095	0.360642	2.39277	0.555238	20.981	408.273	0.869201	1.23013	1.78095	0.516502	0.096318	0.342114	1.09e-06	10	8929	l
854	271	52	8.83479	0.891773	7.18554	10.582	468.79	396.214	20.96	0.578961	1.42695	0.0554593	1.37399	0.72013	3.4547	0.655408	28.874	782.916	1.04467	1.39078	1.37399	0.492767	0.219246	0.538499	0.04225	3.77922	0.290929	3.66491	0.499439	28.7662	777.901	0.998975	1.5174	3.77922	0.669092	0.0498245	0.273141	1.18e-06	11	2667	l
855	210	49	7.72706	0.735339	5.99632	9.3042	531.032	396.434	18.7219	0.457768	1.37971	0.0447578	2.29178	0.83469	7.93174	0.585969	22.313	469.752	1.23418	1.5785	2.29178	0.583023	0.333635	0.684483	0.0323784	5.91018	0.509777	7.02805	0.413418	21.491	431.195	1.1688	1.68316	5.91018	0.741788	0.163688	0.509152	1.3e-06	14	1057	l
856	252	64	8.53499	1.97139	3.63388	12.6572	708.967	402.672	21.4764	0.578683	-1.49834	0.0317065	2.86496	0.768398	7.18509	0.528292	26.8092	677.799	1.19815	1.65991	2.86496	0.617866	0.208658	0.566306	0.0272334	7.12042	0.371129	6.66128	0.405227	26.1885	643.744	1.12418	1.68948	7.12042	0.775084	0.0644398	0.326186	1.08e-06	11	8929	l
857	255	52	8.6217	1.13328	5.85213	10.2964	144.093	401.089	22.4167	0.663182	1.19241	0.056042	2.56681	0.848933	9.49562	0.591475	22.1616	470.074	1.21747	1.58298	2.56681	0.605227	0.318489	0.671563	0.0419274	7.32381	0.542747	9.00848	0.444367	21.7524	447.872	1.18149	1.67937	7.32381	0.775569	0.180026	0.531678	1.26e-06	9	3504	l
858	203	54	7.85874	2.02764	3.68923	11.715	621.527	399.813	21.8962	0.802351	0.157598	0.08289	0.735294	0.822908	3.07602	0.723109	19.6317	356.452	0.953236	1.18287	0.735294	0.39422	0.315846	0.598602	0.0738345	1.92053	0.551406	3.14061	0.577328	19.2583	342.789	0.923954	1.26247	1.92053	0.5388	0.130721	0.40232	1.23e-06	15	8929	l
859	103	28	5.36395	0.502304	4.52896	6.21151	689.621	400.09	12.6431	0.49647	1.17759	0.0769013	0.980392	0.626221	2.31146	0.671148	21.2381	418.092	0.895375	1.17993	0.980392	0.434441	0.175458	0.450587	0.0697419	1.87013	0.192543	2.15804	0.563636	21.0649	413.196	0.805759	1.1774	1.87013	0.538831	0.0233826	0.165747	1.11e-06	10	8929	l
860	140	35	6.24856	0.522541	4.87233	7.32683	673.494	403.273	14.9341	0.465676	0.285351	0.0473503	1.86465	0.670427	3.82888	0.568639	17.7273	286.914	1.07003	1.47315	1.86465	0.538295	0.173155	0.493616	0.048048	4.40541	0.289937	4.10212	0.419506	17.7207	286.702	1.02645	1.49214	4.40541	0.686515	0.0947726	0.371424	1.14e-06	11	8929	l
861	207	46	7.65153	0.681518	6.50004	9.00667	64.1574	405.807	18.0952	0.395012	1.02096	0.0332379	2.87316	0.772587	7.31708	0.535301	24.2003	551.042	1.20794	1.6539	2.87316	0.626717	0.237178	0.599338	0.0240895	8.21667	0.427675	8.17833	0.361364	24.0944	544.828	1.19617	1.76124	8.21667	0.808815	0.0972241	0.405853	1.05e-06	13	1044	l
862	213	48	7.80468	0.993097	6.04296	9.71772	189.077	409.929	20.2511	0.65164	-1.40734	0.024898	2.94545	0.801385	8.41497	0.511679	24.2545	554.794	1.27457	1.74755	2.94545	0.6269	0.240455	0.616238	0.022109	8.48876	0.461564	8.8828	0.362581	23.7697	531.098	1.22958	1.81256	8.48876	0.820942	0.116064	0.447384	1.28e-06	10	3504	l
863	190	59	7.46612	1.90033	3.98748	11.05	634.307	411.164	18.2334	0.491255	0.714111	0.0481693	1.54573	0.730757	3.87052	0.622355	31.5518	937.645	1.09352	1.45604	1.54573	0.504741	0.237314	0.569506	0.0368967	4.44755	0.340115	4.36994	0.485796	31.4685	934.171	1.05244	1.53561	4.44755	0.64639	0.155393	0.477456	1.22e-06	12	8929	l
864	343	79	10.194	2.37841	3.99152	14.9258	666.723	417.47	25.1909	0.552397	0.608368	0.0253228	2.06807	0.866044	8.71924	0.562845	25.4408	611.455	1.30277	1.72824	2.06807	0.559176	0.315005	0.689895	0.0185231	5.90459	0.606396	8.50068	0.39661	25.0283	588.806	1.26469	1.86293	5.90459	0.744899	0.15789	0.522855	1.16e-06	16	8929	l
865	106	32	5.35335	0.524635	4.27977	6.54342	494.225	408.909	13.0262	0.53607	-1.01787	0.0638025	1.47684	0.637534	3.03721	0.608174	30.703	889.943	0.983129	1.31045	1.47684	0.502388	0.188091	0.488058	0.0693333	3.6	0.16742	3.16196	0.494045	30.4533	877.817	0.910666	1.32334	3.6	0.66672	0.0535741	0.265062	1.25e-06	12	158	l
866	262	52	8.72099	1.06024	7.16382	10.8598	470.177	415.355	21.8478	0.64916	1.45618	0.0453965	1.92573	0.732293	4.59672	0.613904	26.6998	666.706	1.12158	1.5037	1.92573	0.557274	0.230804	0.569669	0.0388426	4.37209	0.339568	4.31003	0.47324	26.1581	640.144	1.03293	1.56457	4.37209	0.69314	0.100771	0.391125	1.19e-06	11	2667	l
867	176	42	7.01051	0.535722	5.76889	8.03824	774.608	413.644	16.7672	0.479838	1.00559	0.0432413	1.94453	0.808386	6.07408	0.550489	28.7021	776.853	1.16117	1.54097	1.94453	0.543699	0.278401	0.626488	0.0346981	5.79861	0.450054	6.27198	0.410944	28.4514	762.356	1.11886	1.64404	5.79861	0.742727	0.115273	0.426817	8.82e-07	9	1501	l
868	127	34	6.0295	0.721478	4.15945	7.4641	685.195	415.418	14.7139	0.583056	1.44181	0.103074	0.821759	0.509661	1.83795	0.691898	22.7847	486.258	0.790903	1.04764	0.821759	0.401899	0.138509	0.379947	0.102197	1.42697	0.134301	1.82417	0.583146	22.7079	484.535	0.738213	1.06616	1.42697	0.465061	0.0504291	0.231652	1.13e-06	11	8929	l
869	286	56	9.18179	1.5006	6.38889	12.0013	550.909	418.681	23.9256	0.705521	-0.877451	0.0283267	2.41053	0.834515	8.28321	0.567334	24.1809	552.019	1.26152	1.70075	2.41053	0.587353	0.282566	0.654665	0.0242764	6.3527	0.564573	8.29478	0.434372	23.9129	537.625	1.22368	1.78157	6.3527	0.765793	0.157872	0.512976	1.33e-06	13	1663	l
870	261	57	8.72992	2.3675	3.64055	12.1702	161.731	423.076	25.8327	0.823408	0.392718	0.0285308	2.03287	0.849082	7.73503	0.574123	28.1644	751.117	1.21609	1.6316	2.03287	0.563078	0.284518	0.646496	0.0213152	5.65714	0.593428	7.95712	0.420935	27.6095	719.369	1.20502	1.76599	5.65714	0.739811	0.13822	0.480267	1.29e-06	11	3504	l
871	245	53	8.35441	0.647191	6.96433	9.75318	534.678	421.844	18.9654	0.370817	1.49409	0.0490848	2.10662	0.709695	4.62829	0.607993	25.4287	603.186	1.12277	1.51212	2.10662	0.567415	0.21946	0.557821	0.035441	4.96985	0.335902	4.74181	0.460409	25.1508	589.268	1.0827	1.63238	4.96985	0.714833	0.098949	0.395318	1.33e-06	14	1663	l
872	381	66	10.6056	2.46848	5.97	14.265	711.952	424.976	30.8781	0.811382	0.0455541	0.0541087	2.90838	0.772647	7.39618	0.579629	23.843	535.396	1.19972	1.59143	2.90838	0.625789	0.273108	0.628895	0.0437767	7.38226	0.404805	7.20154	0.444775	23.4801	516.522	1.13962	1.65087	7.38226	0.773028	0.115645	0.428278	1.08e-06	11	8929	l
873	241	49	8.35722	1.15744	6.52631	11.0657	507.119	426.455	21.7485	0.689921	1.5541	0.0474329	2.40365	0.804163	7.13685	0.573426	25.423	609.641	1.18469	1.5911	2.40365	0.593645	0.267223	0.622762	0.046381	5.88832	0.477461	6.63434	0.454449	24.9239	582.463	1.13701	1.61009	5.88832	0.759289	0.132284	0.451592	1.29e-06	15	438	l
874	202	44	7.56469	0.572838	6.29156	8.67557	203.836	425.857	18.0144	0.497959	-0.899413	0.0409561	1.94247	0.804193	5.96015	0.579735	27.4658	708.602	1.18451	1.58104	1.94247	0.556877	0.265748	0.619694	0.0399082	5.16364	0.457886	5.7625	0.433795	27.103	688.049	1.13839	1.62985	5.16364	0.727767	0.104118	0.404855	1.28e-06	11	3504	l
875	168	42	6.84547	0.758597	4.75267	8.30761	623.937	425.068	15.924	0.321596	-1.14786	0.0364919	1.77685	0.798127	5.4009	0.587811	28.1023	741.518	1.1637	1.53896	1.77685	0.53896	0.27797	0.625738	0.0283783	4.9313	0.451627	5.4963	0.420611	27.5725	713.035	1.11537	1.61885	4.9313	0.697668	0.113315	0.420379	1.25e-06	14	8929	l
876	208	44	7.71937	0.668903	6.53732	8.92699	60.9111	427.514	19.0631	0.556743	1.36915	0.0345938	3.251	0.796081	8.9713	0.500365	24.1726	554.446	1.24205	1.69527	3.251	0.643091	0.256653	0.626861	0.02633	8.74534	0.35407	7.76957	0.350343	22.9068	491.129	1.16295	1.75769	8.74534	0.818538	0.0912167	0.393243	1.05e-06	11	275	l
877	184	46	7.24396	0.961225	5.87858	8.89021	263.178	425.079	18.4944	0.655391	0.0705022	0.0279625	1.87156	0.828217	6.44746	0.549379	28.5382	765.851	1.22646	1.62686	1.87156	0.533194	0.28773	0.64898	0.0250923	5.67516	0.507042	6.75623	0.381222	28.5924	768.361	1.18777	1.69214	5.67516	0.72424	0.143277	0.479414	1.16e-06	11	1160	l
878	205	45	7.77678	1.2803	5.50093	10.1988	655.696	433.42	20.8703	0.711775	-0.696454	0.0283613	3.12212	0.82511	9.92592	0.531548	24.0231	549.493	1.28737	1.7529	3.12212	0.643552	0.26659	0.645578	0.0280897	7.82317	0.54119	9.5255	0.396422	23.2622	511.685	1.23027	1.73268	7.82317	0.806387	0.139707	0.478685	1.19e-06	13	8929	l
879	229	51	8.10726	0.87344	6.04392	10.0606	603.514	433.933	19.9201	0.601937	-1.24673	0.0305127	1.81522	0.832175	6.40806	0.570226	26.7041	670.132	1.20284	1.60662	1.81522	0.532452	0.275522	0.633666	0.0246271	4.85484	0.528056	6.14345	0.41306	26.4355	654.75	1.15642	1.70439	4.85484	0.706953	0.109915	0.424054	1.29e-06	15	8929	l
880	187	44	7.26629	0.701292	5.31765	8.71806	105.582	435.269	17.3279	0.485779	1.15707	0.029785	1.86716	0.846441	7.07961	0.580756	25.7537	622.432	1.25923	1.64014	1.86716	0.541752	0.321554	0.683061	0.0220452	4.96552	0.550987	6.52937	0.406056	25.3103	598.238	1.20462	1.7468	4.96552	0.701834	0.173107	0.530868	1.23e-06	9	1663	l
881	188	46	7.35845	1.12442	5.0757	9.77695	486.159	436.54	18.3945	0.629227	-0.838981	0.0522275	1.82362	0.759552	4.79213	0.591911	27.71	720.491	1.1178	1.49561	1.82362	0.542945	0.244694	0.583924	0.0362719	4.54054	0.425077	4.94882	0.425411	27.3108	699.271	1.08075	1.58844	4.54054	0.697588	0.0985213	0.389577	1.25e-06	10	2667	l
882	185	46	7.21293	0.689277	5.56373	8.48776	617.744	436.892	17.0768	0.355288	1.34278	0.0459309	2.59848	0.804103	7.63227	0.564789	22.7015	486.312	1.19846	1.59833	2.59848	0.607732	0.282797	0.639763	0.044802	7.0274	0.436052	7.23053	0.42107	22.1918	461.836	1.12187	1.59847	7.0274	0.781946	0.159576	0.492029	1.26e-06	15	8929	l
883	219	46	7.96996	1.1121	6.11337	10.1801	85.8306	440.247	21.0303	0.690751	-1.18403	0.0258726	2.82494	0.827886	9.20659	0.499672	24.7494	581.313	1.26935	1.73373	2.82494	0.612396	0.261859	0.637886	0.0218938	8.96648	0.462526	9.34132	0.350934	24.095	547.371	1.22639	1.81102	8.96648	0.830831	0.124256	0.461869	1.17e-06	11	1663	l
884	196	44	7.43633	0.568212	6.02766	8.66371	630.722	442.279	17.9502	0.489878	-0.82069	0.0353867	2.59915	0.804893	7.66083	0.536132	25.6473	619.931	1.23652	1.64605	2.59915	0.60774	0.288221	0.652326	0.0289216	7.05063	0.430758	7.193	0.387683	24.9873	585.548	1.15823	1.68796	7.05063	0.782605	0.14322	0.478805	1.23e-06	14	8929	l
885	94	29	5.02185	0.644074	3.46221	5.89746	727.472	440.633	12.722	0.589311	1.41296	0.0397732	3.41796	0.640611	5.75524	0.472328	27.6471	717.437	1.15491	1.59741	3.41796	0.648698	0.177181	0.516671	0.0425971	9.23288	0.17983	6.62864	0.325748	27.7534	724.592	1.08303	1.5115	9.23288	0.783246	0.11876	0.416814	1.04e-06	9	149	l
886	163	39	6.74398	0.33724	5.86558	7.45378	539.577	443.562	15.7453	0.365026	0.901728	0.0375049	2.89708	0.757594	6.97569	0.515888	25.6518	619.943	1.17861	1.6151	2.89708	0.620991	0.234614	0.590784	0.029384	7.74603	0.32062	6.70081	0.363763	24.9206	581.003	1.13102	1.68183	7.74603	0.785122	0.106037	0.414308	1.34e-06	12	219	l
887	254	48	8.57112	0.692504	7.078	10.1845	698.872	447.043	21.2979	0.54546	-1.27832	0.024376	4.04413	0.812172	11.7655	0.478197	22.1518	472.758	1.32534	1.81859	4.04413	0.684625	0.257542	0.64486	0.0217938	11.4151	0.465203	11.6724	0.329335	21.6509	447.329	1.25351	1.83097	11.4151	0.861022	0.167975	0.534044	1.1e-06	11	502	l
888	151	39	6.47929	0.628401	4.99572	7.67335	250.598	444.478	15.7473	0.47827	-1.23679	0.0241841	3.03172	0.781699	7.94388	0.49221	26.9757	685.906	1.26268	1.74446	3.03172	0.626033	0.23963	0.614874	0.0276357	7.55856	0.418556	7.49982	0.363029	26.027	635.836	1.17959	1.69508	7.55856	0.797573	0.111503	0.425916	1.23e-06	13	182	l
889	277	52	8.92681	0.44307	8.0348	9.85181	44.5811	447.947	20.8081	0.399343	0.844615	0.0357569	2.51819	0.810092	7.63003	0.56524	24.1504	548.632	1.24565	1.6392	2.51819	0.601867	0.298773	0.661607	0.0276464	7.01261	0.497705	7.98056	0.42447	23.8109	531.617	1.21208	1.72432	7.01261	0.776858	0.139232	0.476906	9.47e-07	11	353	l
890	189	43	7.29285	0.505045	6.35399	8.43725	63.2408	458.529	17.701	0.490306	1.39232	0.019592	2.99413	0.814655	9.07715	0.48461	24.9354	587.126	1.31735	1.80186	2.99413	0.618154	0.260737	0.64606	0.018048	7.85034	0.505466	8.93711	0.311673	23.9184	537.126	1.26384	1.8303	7.85034	0.78209	0.15039	0.507376	1.07e-06	9	244	l
891	300	61	9.40742	1.92309	6.25933	13.0075	206.275	461.442	26.1274	0.788071	-0.37512	0.0375607	1.4808	0.821918	5.15765	0.610797	27.9561	731.74	1.18691	1.55882	1.4808	0.505076	0.288239	0.639084	0.0259808	4.28163	0.492769	5.2206	0.442608	27.4082	702.09	1.15003	1.6994	4.28163	0.687783	0.121369	0.444009	1.32e-06	10	4540	l
892	224	45	8.01928	0.528915	6.97696	9.0068	651.795	464.059	19.7381	0.505064	0.614614	0.043693	4.66871	0.78817	12.02	0.499163	21.6552	455.101	1.26674	1.73731	4.66871	0.715413	0.259035	0.63536	0.02806	11.4837	0.427971	11.0377	0.366585	21.038	420.831	1.23492	1.79945	11.4837	0.876833	0.155877	0.512141	1.18e-06	12	269	l
893	269	52	8.85354	1.19066	7.07277	10.8071	418.404	468.845	23.6213	0.705959	-1.13394	0.0295232	3.12398	0.822119	9.78111	0.524667	23.9248	544.398	1.2886	1.74955	3.12398	0.641338	0.278398	0.657354	0.0288324	8.37991	0.53274	9.96707	0.401345	23.6026	527.189	1.24863	1.78935	8.37991	0.814096	0.155816	0.510817	1.1e-06	4	591	l
894	251	49	8.50922	0.70854	6.90972	9.75984	49.1404	475.2	20.3826	0.527591	0.477406	0.0410551	1.91594	0.807106	5.96631	0.587215	26.691	668.855	1.17819	1.57718	1.91594	0.554497	0.263525	0.616776	0.0306127	5.19024	0.457119	5.78027	0.431998	25.9707	630.853	1.13281	1.71042	5.19024	0.729738	0.106092	0.417593	9.85e-07	10	327	l
895	199	43	7.56174	0.631872	6.18342	8.76846	27.7335	483.452	17.8579	0.474615	-0.68171	0.0394027	1.82985	0.833075	6.48105	0.581603	27.7099	723.793	1.18259	1.55517	1.82985	0.543526	0.29086	0.641087	0.0296026	5.17722	0.530353	6.51182	0.408223	26.8734	677.992	1.16113	1.67489	5.17722	0.71405	0.12633	0.449629	8.17e-07	8	1697	l
896	240	53	8.28983	1.15816	4.97859	9.97987	520.683	484.576	21.131	0.644288	0.506155	0.0320472	1.98037	0.808735	6.17704	0.57418	26.1212	639.228	1.21141	1.61798	1.98037	0.551909	0.276086	0.635951	0.0262845	4.52128	0.512885	5.64087	0.419865	25.3723	600.895	1.14731	1.69186	4.52128	0.697871	0.129169	0.456444	1.31e-06	11	8774	l
897	157	39	6.60483	0.402373	5.58009	7.43063	688.289	483.592	15.5357	0.369236	1.19267	0.0268352	3.30411	0.759628	7.87291	0.472595	25.5725	615.137	1.26301	1.7367	3.30411	0.63982	0.240736	0.615061	0.0213028	9.31008	0.400802	8.76878	0.321602	25.4341	608.374	1.2141	1.78873	9.31008	0.81984	0.150776	0.502989	1.11e-06	7	201	l
898	190	42	7.44793	1.06825	5.63421	9.14599	68.7546	488.284	19.5852	0.729408	0.978829	0.0511642	1.86257	0.754686	4.7963	0.595799	27.2895	698.421	1.11508	1.49468	1.86257	0.55203	0.240401	0.579048	0.0514832	4.60544	0.318823	4.3805	0.479982	26.5102	659.019	1.01309	1.49154	4.60544	0.714998	0.0797916	0.341442	1.11e-06	11	1185	l
899	201	44	7.5666	0.594049	6.50405	8.90265	501.605	487.772	18.6252	0.521663	-0.3762	0.0272313	3.2058	0.820305	9.92014	0.486995	22.7555	492.967	1.29644	1.73793	3.2058	0.631316	0.278125	0.655447	0.019428	8.78481	0.448669	8.96691	0.332601	21.9241	451.532	1.22505	1.84056	8.78481	0.813415	0.125042	0.466566	1.28e-06	11	8774	l
900	159	38	6.68486	0.52198	5.61372	7.76213	597.4	492.584	15.4338	0.294663	1.03191	0.0296666	2.95591	0.767927	7.36849	0.509071	25.3122	602.478	1.22982	1.67104	2.95591	0.620985	0.245204	0.610836	0.0258667	7.78689	0.386824	7.34964	0.345848	24.7541	573.508	1.17665	1.70736	7.78689	0.770245	0.128112	0.456513	1.26e-06	7	892	l
901	229	49	8.1155	1.1045	5.71968	9.95092	447.428	500.018	20.701	0.567405	-1.24266	0.0225023	3.72914	0.835409	12.3285	0.485189	22.5127	489.866	1.34005	1.82128	3.72914	0.670791	0.275067	0.663766	0.0174547	11.2804	0.518695	12.7186	0.327862	22.0635	466.231	1.31169	1.90547	11.2804	0.859127	0.148497	0.513182	1.17e-06	7	1735	l
902	268	56	8.99918	1.40566	6.23953	11.6835	24.4431	499.562	23.8052	0.713706	0.516581	0.0260829	2.6344	0.85844	10.3049	0.54801	24.6385	579.38	1.29767	1.74388	2.6344	0.606832	0.288222	0.666445	0.0205258	7.1028	0.619771	10.3402	0.397432	23.7196	534.691	1.26004	1.84998	7.1028	0.786929	0.159185	0.523277	7.86e-07	9	1697	l
903	162	41	6.7475	0.949097	5.06877	9.33181	194.762	500.548	17.1616	0.619571	-1.52474	0.0751641	1.05769	0.702156	2.77558	0.668357	18.4493	311.491	0.972277	1.26289	1.05769	0.452436	0.226058	0.5246	0.0533248	2.92537	0.294566	3.07346	0.494428	18.2537	305.119	0.940433	1.40408	2.92537	0.601952	0.0718853	0.31528	1.37e-06	13	4540	l
904	253	53	8.82219	1.63167	5.86137	11.9495	494.402	504.413	24.9043	0.788254	-0.727022	0.0320908	3.35699	0.830894	10.9257	0.531335	22.6627	492.931	1.29481	1.75776	3.35699	0.655876	0.271348	0.651236	0.0288136	10.1698	0.529502	11.8075	0.394868	22.3585	478.64	1.24972	1.78074	10.1698	0.854378	0.143379	0.490363	1.27e-06	10	8774	l
905	202	44	7.61394	0.826952	6.31221	9.17152	769.662	505.854	20.061	0.671621	-0.800048	0.0269187	4.08767	0.791518	10.8034	0.492062	23.7973	541.122	1.3029	1.78147	4.08767	0.683523	0.258805	0.641209	0.0209734	10.9879	0.443454	10.8715	0.346997	23.3636	517.512	1.24997	1.84401	10.9879	0.853161	0.130548	0.476499	8.87e-07	6	795	l
906	229	50	8.10387	0.571013	7.06408	9.36489	533.903	510.319	19.0048	0.459781	1.23795	0.0334099	1.75695	0.845441	6.68377	0.599503	25.1741	594.615	1.2234	1.60164	1.75695	0.538343	0.310945	0.667464	0.0315565	4.59893	0.548502	6.09297	0.445415	24.631	566.939	1.15408	1.65594	4.59893	0.701259	0.144203	0.47634	1.31e-06	13	8774	l
907	259	49	8.6377	0.641436	7.00431	9.85399	93.0324	514.374	20.3771	0.507926	1.32178	0.0601928	2.44515	0.68698	4.90573	0.584195	25.9241	630.402	1.08006	1.47267	2.44515	0.594136	0.18713	0.512014	0.048579	5.33333	0.29469	4.78084	0.470353	25.3426	601.098	1.02576	1.53807	5.33333	0.716752	0.0574581	0.29491	1.23e-06	12	314	l
908	336	63	10.0289	1.7589	7.17757	13.6653	45.8119	518.947	27.1706	0.736549	-0.895121	0.0288407	2.77085	0.861513	11.004	0.555838	24.115	557.384	1.30843	1.75449	2.77085	0.614642	0.295974	0.675548	0.018258	8.53448	0.585931	11.3056	0.398163	23.631	531.702	1.29241	1.89948	8.53448	0.811387	0.149181	0.513581	9.5e-07	12	1185	l
909	216	45	7.8637	0.826294	6.42318	9.42759	11.4742	516.859	19.9629	0.626331	-1.49572	0.0539726	3.10728	0.769822	7.74975	0.559367	24.6909	576.41	1.18523	1.60865	3.10728	0.64322	0.240423	0.596413	0.0410957	8.26667	0.385053	7.72145	0.438253	24.0556	543.709	1.14072	1.64574	8.26667	0.799282	0.128182	0.449224	6.68e-07	6	1697	l
910	214	48	7.77849	0.868974	5.68719	9.65501	518.814	514.944	18.8351	0.504079	0.0263723	0.0245488	2.0987	0.85631	8.30287	0.540107	25.3247	604.882	1.28784	1.69415	2.0987	0.554824	0.314438	0.684481	0.0188613	5.18788	0.601555	7.51016	0.371665	24.5576	565.443	1.22112	1.79648	5.18788	0.706104	0.178209	0.544375	1.3e-06	10	8774	l
911	214	46	7.81091	0.614619	6.46588	9.06876	171.675	523.095	19.5624	0.543548	-1.06511	0.0241242	3.86082	0.820025	11.726	0.47543	22.1546	473.118	1.32018	1.79332	3.86082	0.66883	0.282845	0.667911	0.0168264	12.1148	0.495425	13.0049	0.314788	21.8852	459	1.31597	1.91614	12.1148	0.873334	0.151979	0.519932	1.38e-06	13	1331	l
912	206	47	7.62158	0.782509	5.3516	9.03076	419.885	524.664	18.8856	0.526277	0.415088	0.0265507	2.63698	0.857221	10.2345	0.519176	23.8165	540.85	1.30983	1.75166	2.63698	0.605636	0.302291	0.681245	0.0221408	7.15244	0.590073	9.72404	0.340367	22.9207	497.286	1.2518	1.8134	7.15244	0.758287	0.174367	0.541082	1.15e-06	5	1304	l
913	264	54	8.84256	1.24551	6.03988	11.3186	545.398	530.172	22.4721	0.620714	-0.927644	0.0353966	3.19875	0.845414	11.3462	0.536663	23.6275	536.988	1.2936	1.71472	3.19875	0.646697	0.301485	0.675244	0.0268746	8.98618	0.543806	10.8491	0.384174	22.9954	502.161	1.27557	1.81047	8.98618	0.833167	0.151524	0.506774	1.3e-06	10	8774	l
914	240	47	8.31303	0.62892	7.18658	9.41864	219.849	536.31	20.5838	0.534044	0.468555	0.0300284	3.96571	0.832293	12.8233	0.492773	22.8594	507.037	1.32553	1.79006	3.96571	0.685287	0.276957	0.661478	0.0232374	10.6616	0.538522	12.5516	0.351417	22.0758	468.064	1.27866	1.87722	10.6616	0.865791	0.150465	0.513026	1.37e-06	11	274	l
915	200	43	7.54032	0.855216	5.71152	9.0396	73.498	538.233	18.7349	0.586753	-1.26687	0.0356504	2.31994	0.79021	6.52919	0.541751	25.8435	627.403	1.19381	1.61735	2.31994	0.584023	0.253662	0.612296	0.0329778	5.69333	0.392061	5.68249	0.398924	24.8267	576.047	1.09883	1.65181	5.69333	0.742368	0.0997345	0.398986	1.12e-06	8	1589	l
916	176	42	7.05062	0.635046	5.70962	8.9192	87.3013	538.134	17.4918	0.576541	-0.919549	0.0230146	2.37361	0.843313	8.57435	0.521642	24.8219	581.803	1.28729	1.71736	2.37361	0.566946	0.304919	0.678895	0.0222117	5.89855	0.598573	8.34699	0.352468	24.058	544.224	1.23836	1.73213	5.89855	0.730274	0.165265	0.517738	1.19e-06	8	1589	l
917	199	41	7.56696	0.581129	6.51927	8.74927	572.733	539.372	17.3393	0.130604	0.645353	0.0533116	3.52156	0.786061	9.23027	0.550483	21.2907	432.618	1.21038	1.61551	3.52156	0.662073	0.272238	0.631637	0.0380849	9.73457	0.412516	9.28497	0.413171	20.6728	403.635	1.17337	1.67407	9.73457	0.830255	0.129604	0.455031	1.27e-06	6	1448	l
918	210	47	7.76968	1.02684	5.52393	10.0182	34.6932	543.313	18.9157	0.550873	1.44633	0.0337222	2.18626	0.7969	6.38223	0.55577	25.7266	620.142	1.21535	1.62986	2.18626	0.569514	0.265465	0.626733	0.0291463	4.80124	0.468537	5.517	0.403464	24.7764	573.337	1.11059	1.65555	4.80124	0.702934	0.137904	0.46633	8.47e-07	7	1217	l
919	184	43	7.24876	1.19877	4.71956	9.44235	15.4716	545.266	18.6411	0.68749	1.48314	0.0793265	0.882979	0.705728	2.50027	0.691641	31.6155	945.455	0.950594	1.21503	0.882979	0.41642	0.240339	0.531454	0.0671779	1.8125	0.419566	2.56133	0.560417	31.3403	930.266	0.912775	1.28118	1.8125	0.529551	0.0859539	0.329688	6.87e-07	5	329	l
920	227	47	8.04498	0.505247	6.87129	8.94318	808.503	552.275	18.5078	0.442245	1.11547	0.0709774	1.71394	0.691482	3.7777	0.646421	26.5842	660.965	1.05841	1.37511	1.71394	0.536656	0.245738	0.565438	0.0485438	3.33152	0.396342	3.75944	0.502245	26.4837	656.491	1.01245	1.44754	3.33152	0.647373	0.0991225	0.37433	6.82e-07	4	771	l
921	274	54	8.9156	0.8901	6.84737	11.2512	281.782	553.266	22.8987	0.576127	-0.418169	0.0274391	3.4975	0.865486	14.0005	0.507773	20.0629	398.251	1.36143	1.80857	3.4975	0.65886	0.319394	0.705075	0.0226104	9.61607	0.620473	13.6685	0.369997	19.3839	368.096	1.29973	1.82218	9.61607	0.84023	0.217198	0.598772	1.29e-06	5	1240	l
922	185	43	7.22822	0.857944	5.82441	8.78916	592.883	559.11	18.63	0.658992	-1.32236	0.0856838	2.86466	0.722226	6.15646	0.57079	25.3398	605.847	1.08938	1.48399	2.86466	0.627987	0.22505	0.560014	0.069516	8.22293	0.313494	6.98898	0.446275	25.3185	604.048	1.06326	1.5228	8.22293	0.800449	0.0818987	0.349199	1.22e-06	4	235	l
923	184	41	7.20736	0.316907	6.3035	7.77911	169.865	559.012	16.8242	0.325254	0.553536	0.0388961	3.5098	0.757518	8.23726	0.514749	22.632	483.085	1.23932	1.69478	3.5098	0.663084	0.254519	0.624477	0.03125	7.47222	0.385099	7.07595	0.388092	21.7083	439.087	1.15948	1.72743	7.47222	0.795828	0.11437	0.434798	1.37e-06	8	1331	l
924	201	43	7.58329	0.714875	6.60911	9.38734	109.523	565.737	17.7693	0.39874	0.708475	0.0381574	2.57103	0.777654	6.78162	0.536181	23.8455	532.375	1.2221	1.64585	2.57103	0.600386	0.256873	0.61996	0.0254925	7.13095	0.431213	7.26857	0.360395	23.5952	520.069	1.18708	1.7646	7.13095	0.775933	0.128742	0.464305	1.26e-06	6	1589	l
925	205	45	7.61741	0.511391	5.98352	8.38134	802.265	567.147	17.8051	0.375021	-1.38616	0.0383459	2.76996	0.802601	8.01615	0.54554	23.5034	520.816	1.24308	1.63744	2.76996	0.6212	0.288476	0.651298	0.0286635	7.75	0.447793	8.01729	0.405636	23.0476	497.387	1.20574	1.72041	7.75	0.800147	0.145298	0.486088	7.33e-07	7	771	l
926	208	45	7.70061	0.572903	6.40617	8.88289	816.962	573.136	17.2434	0.219655	-0.510338	0.0897126	2.32091	0.720267	5.14843	0.620759	25.5806	616.579	1.03862	1.38286	2.32091	0.590339	0.234446	0.554407	0.0641298	5.21429	0.373305	5.16015	0.490091	25.381	604.397	1.02997	1.47456	5.21429	0.72906	0.120226	0.414606	6.33e-07	6	771	l
927	222	45	7.97204	0.463189	7.02447	9.58523	701.669	575.781	18.158	0.308822	-1.54762	0.0412916	2.30435	0.771714	6.04707	0.583859	25.1292	590.764	1.19428	1.59349	2.30435	0.590417	0.261587	0.617207	0.0308951	5.03889	0.427253	5.39888	0.460315	24.6944	567.806	1.13071	1.65373	5.03889	0.709644	0.121081	0.438128	1.12e-06	8	2750	l
928	266	54	8.81131	0.928139	7.33455	11.2472	118.855	578.285	22.0587	0.583083	-0.605324	0.0289341	2.0805	0.868543	8.9132	0.565806	22.1713	465.286	1.29755	1.70194	2.0805	0.565717	0.333947	0.703233	0.0178324	6.48246	0.61844	9.49467	0.38255	21.9386	453.925	1.28845	1.88002	6.48246	0.7635	0.166803	0.538277	1.28e-06	8	1589	l
929	202	46	7.56527	0.667714	6.46018	9.12922	134.798	576.924	18.1251	0.387632	0.687654	0.0372577	3.75137	0.786436	9.78278	0.533423	21.8091	453.848	1.25503	1.69861	3.75137	0.668375	0.255143	0.625701	0.0298187	10.414	0.391828	9.56174	0.39993	21.0382	418.529	1.17125	1.72812	10.414	0.82876	0.141766	0.481435	1.32e-06	10	1589	l
930	252	50	8.50187	0.524759	7.09808	9.42246	529.113	577.94	20.1631	0.416168	-0.421155	0.0370185	3.07935	0.810884	9.14143	0.54113	21.862	453.831	1.26232	1.69674	3.07935	0.634532	0.273304	0.64465	0.0300018	7.91346	0.514294	9.14636	0.400839	21.3269	429.198	1.21408	1.74123	7.91346	0.809303	0.139333	0.479113	1.32e-06	9	8774	l
931	209	45	7.7316	0.711924	6.30203	8.95073	309.6	579.144	18.4386	0.477679	1.14748	0.0450487	1.88845	0.82309	6.33731	0.595172	24.7782	575.856	1.19018	1.56291	1.88845	0.552776	0.303099	0.654092	0.0440482	4.94444	0.470276	5.667	0.467073	24.1049	542.855	1.10208	1.55234	4.94444	0.705354	0.167757	0.497422	1.26e-06	9	2153	l
932	255	51	8.95352	2.10175	5.61733	12.0491	325.077	582.158	25.5992	0.839308	-0.736847	0.0306016	2.42919	0.747221	5.80497	0.545011	26.4551	655.534	1.18176	1.63682	2.42919	0.582738	0.206249	0.56007	0.0245319	5.25743	0.367126	5.15361	0.408836	25.8614	624.107	1.1076	1.69898	5.25743	0.726888	0.0637667	0.32538	1.25e-06	9	2153	l
933	231	46	8.16016	0.580643	7.23132	9.62044	412.161	587.292	19.8696	0.526098	0.615562	0.0427284	3.28537	0.782886	8.56601	0.531155	23.6587	530.256	1.2249	1.65479	3.28537	0.652473	0.255717	0.620018	0.0357341	8.31579	0.443897	8.47684	0.424161	23.2	506.614	1.17678	1.7036	8.31579	0.813348	0.1137	0.43088	1.22e-06	5	281	l
934	247	50	8.43267	0.684182	7.30493	10.206	157.258	589.285	19.9122	0.400392	1.41503	0.0260605	2.72667	0.835105	9.2679	0.511557	23.78	535.624	1.30159	1.74083	2.72667	0.609124	0.299258	0.676811	0.0166643	7.86275	0.529272	9.35169	0.338617	23.1569	504.314	1.27605	1.87676	7.86275	0.795734	0.138008	0.492807	1.33e-06	11	1702	l
935	247	50	8.4298	0.828258	6.52629	9.94949	300.271	590.824	21.6843	0.592715	0.919261	0.0340813	4.13348	0.822567	12.648	0.487421	19.8598	386.316	1.31644	1.79487	4.13348	0.692302	0.271961	0.656974	0.0245763	12.5915	0.530142	14.3993	0.362042	19.7277	380.327	1.30702	1.88804	12.5915	0.885624	0.186747	0.567624	1.27e-06	9	2153	l
936	243	50	8.40301	1.05402	6.66321	10.4364	548.906	595.194	22.0429	0.671953	-0.542874	0.0280059	3.07143	0.846377	10.9967	0.515122	24.4229	571.658	1.2984	1.77169	3.07143	0.639101	0.277558	0.659569	0.0217625	8.57	0.579728	11.1958	0.370627	23.87	542.633	1.27753	1.83442	8.57	0.822528	0.170521	0.538169	1.31e-06	10	8774	l
937	255	55	8.60826	1.26292	6.09419	11.3327	224.14	603.053	22.4689	0.682319	-1.17669	0.0302954	2.50866	0.82002	7.96927	0.558816	24.7879	579.63	1.24511	1.68211	2.50866	0.604766	0.269291	0.638383	0.0229161	7.04785	0.532423	8.53655	0.408069	24.2536	553.745	1.21783	1.79671	7.04785	0.781323	0.137569	0.482828	1.32e-06	12	1017	l
938	277	53	8.97685	1.06503	6.79059	11.1938	700.293	602.644	23.3443	0.643281	1.38289	0.0248756	3.47389	0.84252	12.0296	0.506298	22.5852	492.413	1.33038	1.78381	3.47389	0.658143	0.295176	0.678836	0.0212949	9.83043	0.51756	11.1883	0.356792	21.8043	452.187	1.27962	1.79374	9.83043	0.836297	0.161758	0.520298	1.15e-06	13	2750	l
939	185	42	7.28955	0.90804	5.70421	9.09028	439.099	601.796	19.5012	0.692593	-0.504122	0.0247849	4.07068	0.814839	11.9923	0.45453	22.8376	503.135	1.31467	1.82464	4.07068	0.684311	0.25073	0.6382	0.018604	11.634	0.489252	12.3892	0.311296	22.5229	485.091	1.28215	1.87727	11.634	0.871408	0.150018	0.512328	1.24e-06	7	238	l
940	158	39	6.65257	0.51121	5.42264	7.6507	183.737	605.514	15.7877	0.415773	-0.796237	0.0287715	3.18182	0.786779	8.46131	0.507265	22.943	497.467	1.24494	1.70094	3.18182	0.64308	0.254331	0.62515	0.0276135	8.41803	0.426114	8.33423	0.338502	22.2377	464.426	1.1781	1.64751	8.41803	0.808597	0.115546	0.427708	1.32e-06	11	1702	l
941	312	68	9.50869	2.03939	3.61561	12.3103	536.706	608.685	25.7653	0.683567	1.16878	0.0188147	2.99025	0.865764	12.1381	0.517365	23.6977	539.93	1.37355	1.86563	2.99025	0.62683	0.293434	0.688138	0.0142	8.376	0.609185	11.7161	0.354692	22.912	500.317	1.32893	1.95772	8.376	0.808807	0.158436	0.534782	1.33e-06	14	8774	l
942	280	50	9.05775	0.746642	7.8243	10.5195	162.163	609.089	20.9163	0.36493	-0.0420567	0.0321357	2.63486	0.79909	7.55732	0.547689	24.1013	546.02	1.24463	1.67637	2.63486	0.607007	0.263882	0.631874	0.0243078	7.11538	0.424452	7.1814	0.402946	23.4145	511.544	1.18992	1.76943	7.11538	0.777298	0.111866	0.434907	1.31e-06	10	1702	l
943	130	35	5.99114	0.543707	5.00392	7.0191	629.714	607.568	14.6688	0.551803	-0.547098	0.0445143	2.26419	0.698325	4.7527	0.562381	28.5349	764.247	1.12143	1.50105	2.26419	0.579025	0.236955	0.576206	0.0348574	5.67021	0.260482	4.83372	0.422378	27.9255	731.685	1.0551	1.56636	5.67021	0.73195	0.139394	0.457374	1.18e-06	7	178	l
944	237	47	8.2832	0.756253	6.96707	9.70784	323.749	616.647	20.2424	0.581382	-0.62664	0.0382212	2.85052	0.739345	6.468	0.564496	24.6605	569.263	1.20327	1.64349	2.85052	0.619547	0.236275	0.596808	0.0353499	7.42857	0.359854	6.80224	0.440118	24.398	556.783	1.13849	1.6523	7.42857	0.769198	0.123216	0.441627	1.24e-06	14	1199	l
945	222	47	7.95158	0.545897	6.84525	9.19331	420.594	623.261	18.7382	0.40939	1.47319	0.0430801	3.04969	0.787071	8.16129	0.533871	24.5925	571.863	1.22017	1.64418	3.04969	0.63833	0.260577	0.623679	0.0331784	8.47802	0.399233	8.05599	0.379675	24.0824	544.624	1.17221	1.71443	8.47802	0.799209	0.127514	0.456337	1.25e-06	4	614	l
946	372	85	10.6285	2.33467	5.40978	15.3729	162.936	635.158	26.5974	0.621834	0.500881	0.0297152	2.01197	0.834663	7.08444	0.600732	26.018	634.468	1.27644	1.68688	2.01197	0.560185	0.306804	0.676288	0.021978	5.01639	0.5947	7.18849	0.449375	25.7311	619.037	1.25055	1.79302	5.01639	0.70329	0.169777	0.531959	1.27e-06	9	3171	l
947	187	45	7.32324	0.889865	5.86519	9.72171	753.788	632.603	17.8263	0.525119	-1.2834	0.0298639	2.52246	0.825173	8.21417	0.528972	24.25	554.588	1.26624	1.69385	2.52246	0.595634	0.285514	0.656628	0.0221333	7.45333	0.522198	8.7996	0.366555	23.96	540.354	1.23096	1.77792	7.45333	0.794517	0.147345	0.496317	1.08e-06	10	8303	l
948	178	45	7.03937	0.592864	5.39611	8.14222	433.49	633.58	15.8195	0.173624	-0.129667	0.0388865	1.51496	0.792805	4.65589	0.590014	29.1433	797.273	1.14037	1.51435	1.51496	0.50084	0.261105	0.604492	0.0286145	4.37037	0.438539	4.89196	0.410946	28.4741	759.842	1.1127	1.64038	4.37037	0.681141	0.0996703	0.397596	1.27e-06	6	614	l
949	157	41	6.6715	1.11999	4.29608	8.84653	320.326	638.173	17.4359	0.718926	-1.16633	0.0680821	0.888087	0.725846	2.61968	0.688087	32.1841	981.116	0.950707	1.21942	0.888087	0.420067	0.236841	0.528538	0.0511696	2	0.397748	2.66043	0.525077	31.8421	961.002	0.917035	1.32942	2	0.529628	0.0692637	0.301622	1.23e-06	9	1199	l
950	180	41	7.14458	0.486182	6.1077	8.03417	306.371	639.11	17.262	0.493175	0.541335	0.0315936	3.15635	0.780111	8.17714	0.513105	23.8622	537.211	1.24235	1.69906	3.15635	0.638795	0.241152	0.610274	0.0275749	7.7973	0.477393	8.46001	0.361201	23.5676	523.165	1.1818	1.75357	7.7973	0.787766	0.146791	0.492494	1.23e-06	12	1199	l
951	243	49	8.37978	0.595079	7.0245	9.33267	516.398	640.508	19.7799	0.405166	-0.951349	0.0364793	3.26357	0.821151	10.1238	0.523427	22.4514	481.985	1.26756	1.70382	3.26357	0.649777	0.274949	0.647359	0.0286356	9.59296	0.456449	9.82435	0.397619	21.9045	454.109	1.2066	1.75758	9.59296	0.816727	0.14533	0.490679	1.35e-06	13	8774	l
952	54	22	3.71824	0.651692	2.5	4.60977	418.987	638.617	10.2503	0.734549	-1.50855	0.041698	2.14857	0.711972	4.7298	0.527529	32.1714	977.462	1.11195	1.49882	2.14857	0.557489	0.219108	0.555375	0.0615234	7.1875	0.14319	5.19434	0.372822	31.6875	954.714	0.944634	1.31358	7.1875	0.758369	0.200436	0.503676	1.26e-06	6	614	l
953	373	64	10.5216	1.45475	7.31278	13.2739	569.664	650.776	25.7076	0.58496	-1.03898	0.0469626	1.31884	0.853641	5.50551	0.658608	27.8638	730.51	1.1466	1.47961	1.31884	0.486714	0.326595	0.662363	0.037854	3.13072	0.623017	5.15233	0.496566	27.3595	702.876	1.1031	1.57011	3.13072	0.629899	0.153297	0.479027	1.3e-06	11	1662	l
954	128	35	5.91643	0.477969	4.97668	6.90105	145.943	646.778	13.962	0.38117	1.28667	0.0311309	2.47111	0.721573	5.43762	0.510858	26.8489	674.689	1.16992	1.60511	2.47111	0.582612	0.221871	0.574507	0.0251479	7.01923	0.311308	6.09606	0.348176	26.5192	658.872	1.1124	1.68122	7.01923	0.768755	0.119021	0.437781	1.24e-06	9	3171	l
955	193	43	7.47912	1.10506	5.81535	9.25628	237.834	657.344	20.1351	0.730682	-1.08993	0.0301088	2.79683	0.789185	7.63336	0.516212	25.4798	611.861	1.22855	1.68251	2.79683	0.618196	0.244991	0.612239	0.0207617	8.2875	0.43694	8.35934	0.355909	25.1125	592.891	1.20139	1.78628	8.2875	0.816152	0.109487	0.432318	1.22e-06	10	261	l
956	263	50	8.69326	0.446444	7.82739	9.60354	309.064	660.251	20.9097	0.3991	-1.46075	0.0195245	3.8278	0.844621	13.3176	0.47343	21.4813	449.907	1.37003	1.86105	3.8278	0.676211	0.295599	0.68965	0.0192946	11.7354	0.538427	13.7124	0.332447	20.8744	421.394	1.32246	1.87574	11.7354	0.878851	0.180286	0.557155	1.2e-06	11	1181	l
957	319	63	9.72857	1.7128	6.75835	12.5651	752.608	662.336	25.679	0.747201	-1.01356	0.0517151	1.6661	0.778131	4.75469	0.628965	27.6986	719.132	1.13213	1.50563	1.6661	0.529265	0.257402	0.599204	0.0386464	4.37308	0.429899	4.83535	0.464817	27.3885	702.141	1.09829	1.58935	4.37308	0.694768	0.0906984	0.374368	1.11e-06	14	8303	l
958	282	54	9.09608	1.16346	7.47839	11.5998	214.83	659.751	24.1009	0.691224	-0.554777	0.0319752	3.66248	0.801229	10.2128	0.50928	21.7553	452.036	1.28955	1.75552	3.66248	0.666338	0.258442	0.637252	0.0240651	8.68996	0.453799	8.9549	0.366315	20.8996	410.039	1.22956	1.82494	8.68996	0.799576	0.127833	0.469669	1.22e-06	9	347	l
959	211	44	7.76804	0.915859	6.50004	9.36267	415.088	658.472	20.52	0.685201	0.141257	0.0349609	3.4366	0.786191	9.03661	0.518644	23.3843	518.585	1.25119	1.69758	3.4366	0.653623	0.2571	0.627672	0.02745	8.95858	0.403434	8.50846	0.377202	22.5562	477.346	1.19571	1.75881	8.95858	0.822073	0.115117	0.439687	1.28e-06	6	262	l
960	249	52	8.5999	1.23688	6.37696	10.9567	589.395	659.277	22.7738	0.714492	0.441947	0.0248832	3.5969	0.785626	9.38933	0.502202	23.4219	519.99	1.28531	1.79165	3.5969	0.657782	0.230997	0.611301	0.0215999	9.72596	0.442501	9.72286	0.360275	23.1779	506.051	1.24879	1.85432	9.72596	0.816379	0.112351	0.445051	1.26e-06	12	1662	l
961	177	41	7.06069	0.399638	6.22831	7.87318	532.957	661.629	16.249	0.246239	0.130136	0.030571	3.26299	0.7682	8.03838	0.498189	23.8488	535.635	1.24917	1.70731	3.26299	0.639234	0.246206	0.617107	0.0211486	9.64626	0.389845	8.90476	0.310901	23.7143	528.908	1.19907	1.79033	9.64626	0.820298	0.130585	0.470419	1.35e-06	15	1662	l
962	267	50	8.78706	0.513437	7.6788	9.85515	800.097	662.864	20.2134	0.478092	-0.287671	0.0430381	1.59857	0.768753	4.45642	0.606036	27.8478	726.264	1.12634	1.49665	1.59857	0.518208	0.244093	0.58343	0.0304683	4.14097	0.439035	4.69093	0.45238	27.9471	731.523	1.09756	1.63799	4.14097	0.686165	0.0777716	0.352328	8.21e-07	9	8303	l
963	152	37	6.51228	0.405378	5.30618	7.25735	331.357	665.604	15.0607	0.396672	1.05397	0.0333708	1.66359	0.782776	4.82919	0.577514	28.8355	780.425	1.14484	1.53294	1.66359	0.516904	0.252198	0.597914	0.0236918	4.56303	0.4309	5.00899	0.391479	28.563	765.646	1.10081	1.66585	4.56303	0.683382	0.100867	0.402718	1.2e-06	10	204	l
964	333	64	9.87064	1.7876	6.26997	12.7598	567.446	669.116	27.2048	0.73903	-0.262453	0.0273382	1.63562	0.903536	9.47785	0.594762	25.7778	631.189	1.30507	1.684	1.63562	0.521484	0.362211	0.724708	0.0201411	5.05923	0.681095	8.93218	0.427837	25.3171	605.324	1.26183	1.82383	5.05923	0.719625	0.187583	0.560755	1.3e-06	13	1662	l
965	199	43	7.60056	0.92145	5.81386	9.0816	655.962	671.439	19.8819	0.693303	-0.738359	0.0509511	3.09192	0.76729	7.64329	0.538005	25.0585	594.139	1.17006	1.56874	3.09192	0.639957	0.244763	0.59528	0.0544153	7.69565	0.408717	7.50759	0.438851	24.6646	574.036	1.09129	1.53908	7.69565	0.801837	0.13091	0.440382	1.2e-06	13	459	l
966	184	42	7.19683	0.352857	6.40759	8.08939	370.983	675.112	16.97	0.389735	0.616106	0.0207932	2.69486	0.830097	8.93059	0.480647	25.6616	622.002	1.31056	1.76292	2.69486	0.592403	0.294589	0.675375	0.0202546	7.40972	0.487812	8.2334	0.327659	24.8958	581.456	1.23294	1.80202	7.40972	0.776694	0.160346	0.519207	1.24e-06	11	655	l
967	276	54	9.02393	1.4651	6.72722	11.8586	789.773	678.722	23.8491	0.706259	1.35718	0.0230133	2.25099	0.866165	9.40959	0.548804	25.8978	636.089	1.30714	1.73432	2.25099	0.574842	0.316252	0.691909	0.0167517	7.25	0.583444	9.70231	0.374693	25.7161	625.009	1.27332	1.84186	7.25	0.786229	0.157987	0.520483	9.03e-07	11	8303	l
968	244	49	8.37835	0.706201	6.91186	9.52432	540.812	679.719	21.0677	0.562054	0.130899	0.0220879	4.21597	0.822569	12.8806	0.471962	22.2857	481.385	1.35539	1.85893	4.21597	0.687215	0.26722	0.660579	0.0167323	10.7761	0.521268	12.2548	0.313246	21.5821	445.5	1.30263	1.90922	10.7761	0.848092	0.161812	0.534294	1.35e-06	14	1048	l
969	278	54	9.01248	0.856991	7.59532	10.6382	202.051	682.16	21.5615	0.477623	-1.5598	0.0276908	3.01772	0.825389	9.64124	0.536109	22.9232	499.338	1.29476	1.76223	3.01772	0.625814	0.273801	0.6544	0.0196793	8.41048	0.540015	10.1421	0.395024	22.3843	474.378	1.26035	1.86158	8.41048	0.810213	0.153534	0.515991	1.19e-06	9	1652	l
970	174	42	7.05173	0.707429	5.6557	8.93822	395.368	679.887	17.3688	0.509982	1.10336	0.0237903	3.35864	0.809185	9.80076	0.492801	25.0226	594.944	1.29289	1.76621	3.35864	0.647446	0.258178	0.638441	0.0248693	8.69065	0.492894	9.56886	0.354612	24.6331	573.857	1.21788	1.73724	8.69065	0.82595	0.174512	0.531622	1.27e-06	9	1081	l
971	180	40	7.16743	0.558888	6.18794	8.25473	691.085	679.5	17.3363	0.512912	0.812635	0.0234089	2.42747	0.820964	7.77927	0.504021	26.125	642.181	1.27562	1.70233	2.42747	0.575803	0.286677	0.659007	0.0209921	5.76642	0.524201	7.05973	0.351514	25.2993	599.243	1.2001	1.76093	5.76642	0.719887	0.141037	0.48423	1.21e-06	12	1076	l
972	215	44	7.84805	0.570098	6.46434	8.68994	42.7751	682.088	18.9044	0.436455	-0.917919	0.0228616	4.49872	0.764271	10.5422	0.475929	20.809	413.639	1.31618	1.84548	4.49872	0.701023	0.228683	0.615676	0.0177073	12.392	0.360406	10.6874	0.324494	20.108	381.769	1.25559	1.86699	12.392	0.867513	0.110431	0.44278	8.68e-07	10	310	l
973	223	47	7.99025	1.09368	5.98599	9.95747	435.701	683.451	20.9379	0.666498	1.28709	0.0336534	3.83807	0.776083	9.57029	0.511868	23.1706	510.682	1.25623	1.72154	3.83807	0.679707	0.253257	0.626888	0.0243906	10.0894	0.427095	9.80547	0.387378	22.514	478.699	1.21687	1.781	10.0894	0.851037	0.144217	0.491733	1.31e-06	9	280	l
974	210	46	7.74251	0.87343	5.74526	9.28108	775.804	683.709	19.1047	0.565238	-1.53295	0.0400669	2.14644	0.813628	6.75849	0.566115	26.7639	674.889	1.1904	1.58291	2.14644	0.568924	0.270476	0.62489	0.0276408	6.38286	0.484331	7.18891	0.398004	26.5543	662.528	1.17408	1.69064	6.38286	0.766532	0.124296	0.448036	9.99e-07	16	8303	l
975	281	54	9.01423	0.770176	7.75448	10.6329	354.853	686.427	21.496	0.375634	1.12559	0.0252902	3.0485	0.867363	12.4919	0.517	22.8817	507.12	1.33634	1.78933	3.0485	0.638029	0.3078	0.691696	0.0169911	10.619	0.594504	14.0939	0.361828	22.7698	501.151	1.33636	1.9443	10.619	0.864452	0.165208	0.543515	1.21e-06	9	655	l
976	260	53	8.75858	1.15819	6.86958	11.3288	229.902	687.722	22.69	0.636124	-0.39858	0.0201029	4.00634	0.817873	11.9987	0.480682	21.6199	450.937	1.34798	1.87938	4.00634	0.681154	0.245943	0.640034	0.0156898	11.4521	0.500029	12.4527	0.331001	21.105	426.438	1.30403	1.94097	11.4521	0.8663	0.121943	0.472016	1.16e-06	10	1652	l
977	220	49	7.92772	1.07222	5.34729	9.67332	306.757	687.406	19.8096	0.549538	-1.40837	0.025883	2.87264	0.853297	10.7907	0.533922	23.1627	513.575	1.31583	1.74828	2.87264	0.625351	0.303358	0.681788	0.0213041	8.11798	0.595272	11.0289	0.377167	22.8258	495.933	1.28669	1.79936	8.11798	0.816279	0.176851	0.542833	1.16e-06	10	1181	l
978	277	51	9.07819	1.19115	7.00637	11.1668	157.909	689.859	24.7617	0.729976	-0.541432	0.0225123	3.43602	0.856604	12.9809	0.478934	21.7746	461.396	1.35627	1.85615	3.43602	0.651761	0.275986	0.669358	0.0162078	9.30045	0.580469	12.0843	0.331072	20.87	417.631	1.30993	1.94285	9.30045	0.835845	0.15355	0.525474	1.19e-06	9	3171	l
979	187	44	7.30427	0.659017	5.96655	8.82968	729.785	693.567	17.4304	0.422193	-0.964324	0.0243576	3.04335	0.819292	9.42064	0.507736	25.8535	634.599	1.27792	1.74841	3.04335	0.634066	0.259974	0.637915	0.0221204	7.81633	0.511653	9.00283	0.355254	25.381	607.055	1.23846	1.7594	7.81633	0.802613	0.116994	0.443148	1.18e-06	12	8303	l
980	170	41	6.95374	0.720241	5.53744	8.4683	253.141	693.385	17.5151	0.620911	-1.01194	0.0268271	2.64309	0.795498	7.46226	0.526924	26.7714	675.823	1.22501	1.6852	2.64309	0.596491	0.239867	0.606861	0.0236164	6.43411	0.44333	6.7791	0.366856	25.876	627.876	1.15363	1.73766	6.43411	0.747613	0.121301	0.448325	1.14e-06	9	240	l
981	241	49	8.29879	0.644474	6.79138	9.47932	786.707	701.319	19.6649	0.429341	-0.97734	0.024961	2.28246	0.856552	8.95572	0.530842	25.6014	620.441	1.29292	1.70938	2.28246	0.576036	0.317229	0.689254	0.0182141	6.7402	0.600461	9.43497	0.357984	25.3775	608.379	1.26563	1.82846	6.7402	0.767064	0.177261	0.547057	9.23e-07	12	8303	l
982	221	47	7.94943	0.584055	6.43936	9.07753	300.565	702.632	18.8928	0.384861	0.140238	0.0543445	3.385	0.815995	10.1981	0.55193	20.76	414.459	1.23945	1.66646	3.385	0.647941	0.279951	0.647056	0.0392069	10.1749	0.469392	10.5879	0.398754	20.2295	390.693	1.18966	1.71079	10.1749	0.826138	0.170734	0.522857	1.14e-06	10	1181	l
983	235	48	8.21824	1.01639	5.94685	9.97447	16.7038	704.445	21.0417	0.617372	1.22031	0.0215622	3.26082	0.828386	10.5004	0.507236	23.483	525.656	1.32643	1.80297	3.26082	0.64178	0.272952	0.659105	0.0170192	9.68528	0.535129	11.4172	0.340977	22.8528	496.46	1.30107	1.88974	9.68528	0.839208	0.157549	0.525509	6.95e-07	8	442	l
984	263	62	9.13029	2.79901	4.45734	14.2997	595.433	711.953	28.9439	0.891116	-1.51318	0.0319811	2.51899	0.795551	7.16042	0.519583	26.2046	645.974	1.22762	1.65148	2.51899	0.592616	0.266343	0.630843	0.0296775	6.62189	0.386507	6.39688	0.403362	25.2985	599.179	1.128	1.64312	6.62189	0.771661	0.11038	0.417926	1.23e-06	10	587	l
985	220	43	7.98883	0.854542	6.70175	9.80778	763.468	709.23	19.8004	0.613002	-1.5367	0.0498034	2.58897	0.733939	5.86538	0.57706	24.7769	575.392	1.14392	1.53486	2.58897	0.604978	0.232317	0.576178	0.0438404	5.69318	0.380438	5.59452	0.480861	24.4091	557.33	1.07146	1.54101	5.69318	0.737355	0.108926	0.40331	1.06e-06	13	2032	l
986	235	68	8.34168	1.96515	4.16163	12.0597	452.179	711.752	20.1447	0.391992	0.171641	0.0285087	2.47503	0.783055	6.70427	0.54006	26.1949	643.499	1.23178	1.68668	2.47503	0.595307	0.234471	0.600912	0.0201608	6.57955	0.43836	6.85744	0.378588	25.9545	630.324	1.18614	1.7967	6.57955	0.755222	0.113956	0.441772	1.35e-06	10	1187	l
987	182	44	7.18318	0.888472	5.49577	8.96072	696.194	708.386	18.4365	0.629067	0.621357	0.0359964	3.46615	0.766827	8.43257	0.512316	24.1431	550.66	1.24338	1.70601	3.46615	0.655565	0.235963	0.605344	0.029696	9.43836	0.382237	8.63914	0.375554	23.863	535.353	1.18628	1.71621	9.43836	0.827507	0.12176	0.446648	1.2e-06	10	1076	l
988	268	53	8.85111	1.1605	6.31783	10.8849	51.0472	713.024	23.2198	0.702869	-0.88742	0.026991	2.66053	0.821521	8.45334	0.531802	24.2086	552.758	1.28251	1.74216	2.66053	0.607683	0.269192	0.646812	0.0240747	7.58559	0.497198	8.54332	0.381239	23.7928	531.254	1.23916	1.8359	7.58559	0.806246	0.133224	0.480126	9.41e-07	9	793	l
989	280	52	9.03538	0.530661	7.94594	10.4414	67.6859	717.026	20.841	0.322486	0.877097	0.0409067	2.72833	0.803191	7.93142	0.568446	21.9026	452.242	1.23273	1.62732	2.72833	0.611319	0.291439	0.652704	0.0301857	6.88186	0.469948	7.49168	0.438867	21.4051	427.921	1.18536	1.69826	6.88186	0.771748	0.121559	0.444206	1.03e-06	11	793	l
990	234	57	8.3378	1.66278	5.0451	11.1755	749.01	717.602	21.0121	0.588215	-0.140036	0.0364362	2.74519	0.843846	9.79004	0.541514	24.7957	586.555	1.2555	1.68623	2.74519	0.616342	0.289265	0.659251	0.0343243	7.16022	0.546043	8.88645	0.414608	24.1105	549.996	1.18431	1.70671	7.16022	0.783179	0.165748	0.515182	1.12e-06	12	2032	l
991	187	41	7.29717	0.508606	6.51676	8.51426	547.843	720.978	17.9481	0.495245	0.904881	0.0271663	4.62908	0.790337	12.0393	0.460576	22.1632	474.283	1.31242	1.8225	4.62908	0.714418	0.240419	0.626318	0.0253598	12.7075	0.40383	11.6576	0.360503	21.619	445.797	1.22606	1.82205	12.7075	0.897214	0.149819	0.5055	1.32e-06	12	1045	l
992	229	46	8.11422	0.769947	6.18038	9.33328	473.069	727.882	20.8043	0.614764	0.410929	0.0330146	3.18848	0.828408	10.2908	0.537029	20.9316	419.771	1.28988	1.71334	3.18848	0.638398	0.300516	0.674117	0.0289256	7.81283	0.503746	8.87181	0.422988	20.2299	386.187	1.19019	1.7039	7.81283	0.779164	0.156168	0.500712	1.36e-06	13	1234	l
993	243	47	8.44462	0.983474	6.91421	10.2	566.416	728.328	21.9422	0.663726	1.01803	0.0247639	3.354	0.811376	9.8907	0.509793	22.5716	483.556	1.32666	1.77985	3.354	0.648402	0.294486	0.677618	0.0176278	9.63158	0.513099	10.8907	0.3545	22.445	477.452	1.29028	1.87543	9.63158	0.832617	0.14529	0.504573	1.27e-06	11	1045	l
994	249	49	8.68175	1.52011	5.95992	11.2934	787.233	731.187	23.7486	0.736551	0.801231	0.0353383	3.94598	0.814198	11.6187	0.506362	22.5325	489.018	1.3078	1.78535	3.94598	0.686117	0.263719	0.647005	0.0209302	11.6093	0.521834	13.1394	0.36134	22.7349	496.751	1.29188	1.87869	11.6093	0.880463	0.150355	0.513025	8.96e-07	11	2032	l
995	227	48	8.05877	0.656066	6.80692	9.36087	28.7897	735.562	20.066	0.485404	0.997831	0.0158053	4.38788	0.823172	13.4072	0.432099	20.1406	396.674	1.39406	1.94346	4.38788	0.692327	0.256655	0.660103	0.0163029	11.2898	0.496057	12.2014	0.295226	18.8125	340.093	1.30315	1.9253	11.2898	0.868472	0.157821	0.530088	8.09e-07	9	1090	l
996	210	45	7.7358	0.685204	6.25203	9.04182	656.664	737.669	19.1311	0.525626	-0.911039	0.0258605	3.56842	0.809897	10.3855	0.48541	23.4921	525.884	1.31306	1.75448	3.56842	0.664672	0.288411	0.668116	0.021008	9.99419	0.481913	10.6453	0.357239	22.9826	501.43	1.23761	1.79211	9.99419	0.840604	0.175394	0.539865	1.14e-06	10	252	l
997	219	47	7.91258	1.15342	5.27509	9.7368	695.277	742.931	21.3053	0.709751	-1.48041	0.0228493	2.84887	0.824148	9.10017	0.497919	24.4106	563.646	1.30009	1.75653	2.84887	0.614751	0.277856	0.657774	0.0181878	7.94286	0.507034	9.0562	0.345892	23.6914	527.896	1.25008	1.85822	7.94286	0.803709	0.144472	0.501257	1.15e-06	10	307	l
998	332	59	10.0035	1.49797	6.9727	12.5883	430.894	751.318	26.4311	0.708532	0.878786	0.020704	2.48078	0.893318	12.627	0.550892	25.4783	625.497	1.36465	1.81453	2.48078	0.596513	0.321966	0.708223	0.0156309	7.33798	0.69056	12.8569	0.383402	25.1986	608.874	1.34939	1.92385	7.33798	0.781175	0.179184	0.561437	1.33e-06	9	1305	l
999	311	67	9.75194	2.12815	5.26866	14.5252	80.6597	751.678	24.9572	0.60092	0.137245	0.0303551	2.90455	0.814858	8.84412	0.53943	21.7556	447.526	1.28477	1.7244	2.90455	0.626439	0.278641	0.654065	0.0211463	8.46067	0.503718	9.52407	0.395685	21.4869	435.145	1.25054	1.82751	8.46067	0.8122	0.126081	0.466918	1.1e-06	11	8589	l
1000	259	50	8.63813	0.562399	7.15726	9.63049	455.434	751.729	20.5398	0.404081	1.09705	0.0199663	3.37909	0.843195	11.7748	0.495691	23.1299	513.498	1.36344	1.84679	3.37909	0.648817	0.294654	0.686841	0.0148767	9.46575	0.570082	12.0088	0.331857	22.8174	496.177	1.3323	1.93534	9.46575	0.838012	0.172883	0.553776	1.35e-06	13	2433	l
1001	290	57	9.24772	1.85984	5.59319	12.5231	786.818	751.928	25.6045	0.775481	-0.51392	0.0403168	2.29123	0.791597	6.49712	0.584414	25.9369	631.225	1.20776	1.62146	2.29123	0.587596	0.263486	0.623403	0.0299399	6.35246	0.43377	6.60943	0.437304	25.6311	613.974	1.17938	1.70032	6.35246	0.760413	0.115204	0.433216	8.74e-07	8	2032	l
1002	210	46	7.7231	0.843474	5.61547	9.20839	391.806	753.494	19.0584	0.513873	0.140002	0.0261225	3.55482	0.807746	10.2451	0.482292	23.5892	530.48	1.29445	1.76392	3.55482	0.662073	0.269277	0.649927	0.0189122	10.9944	0.4813	11.598	0.315578	23.5706	528.199	1.28158	1.84549	10.9944	0.868229	0.160508	0.524735	1.28e-06	10	1305	l
1003	223	47	8.00686	0.804426	6.54839	9.90532	313.662	757.251	20.4673	0.593361	0.779801	0.0231817	4.07302	0.824731	12.6194	0.475876	21.1126	432.971	1.34985	1.83758	4.07302	0.685077	0.272778	0.663576	0.0195592	10.4343	0.49203	11.2706	0.333212	20.1943	388.635	1.27373	1.86295	10.4343	0.846862	0.151312	0.512684	1.11e-06	7	1368	l
1004	242	50	8.39116	0.869957	6.94058	10.1514	228.387	760.066	21.3414	0.602557	0.819559	0.0232555	3.00114	0.859769	11.7007	0.501743	23.3979	527.077	1.32364	1.78004	3.00114	0.621381	0.290336	0.673568	0.0168095	8.73737	0.576206	11.3085	0.346137	22.7374	492.518	1.28928	1.89375	8.73737	0.824662	0.147992	0.511024	1.06e-06	8	2096	l
1005	220	46	7.90514	0.36727	6.85913	8.68807	654.361	762.917	18.6775	0.303247	-1.5392	0.0262194	4.41302	0.800937	12.0845	0.485408	21.7497	457.137	1.32391	1.8008	4.41302	0.707076	0.277399	0.663394	0.0213652	12.6448	0.463211	12.7782	0.341399	21.4754	442.413	1.27777	1.82998	12.6448	0.876537	0.173683	0.542167	1.11e-06	6	278	l
1006	208	48	7.74296	1.49556	4.80641	10.0798	295.118	765.006	21.7245	0.781135	1.42693	0.0288832	2.4486	0.796978	7.03037	0.536665	26.6943	669.618	1.2395	1.67192	2.4486	0.591202	0.26204	0.629278	0.0215744	7.03529	0.438312	7.26263	0.393708	26.2353	645.215	1.19133	1.74277	7.03529	0.780724	0.13038	0.464522	1.07e-06	6	261	l
1007	332	65	9.99274	1.69462	6.75707	13.6431	83.3237	770.401	26.0118	0.701756	-0.623317	0.0251	2.19458	0.867742	9.29656	0.575741	22.1437	464.359	1.3262	1.74492	2.19458	0.575368	0.324225	0.700677	0.0181276	6.27778	0.61619	9.17823	0.402149	21.4926	435.022	1.27907	1.87144	6.27778	0.751631	0.168619	0.539914	1.12e-06	10	8589	l
1008	263	51	8.76272	0.988886	7.14428	11.2329	104.823	769.369	22.056	0.59904	0.358677	0.0294931	3.1103	0.813401	9.33417	0.533396	21.5952	442.056	1.30162	1.73821	3.1103	0.635843	0.290912	0.668308	0.0205265	8.43578	0.513023	9.66137	0.369598	21.2064	424.085	1.25961	1.83377	8.43578	0.801861	0.160789	0.523742	1.16e-06	10	8589	l
1009	228	48	8.07187	0.651136	7.05368	9.65251	179.289	770.306	19.6487	0.489554	-1.56887	0.0491865	3.71618	0.764469	8.88894	0.539137	22.4529	479.403	1.20289	1.64081	3.71618	0.669598	0.237859	0.598222	0.0399097	8.20225	0.378839	7.60235	0.425858	21.4045	429.627	1.12101	1.65913	8.20225	0.798577	0.120348	0.437497	1.11e-06	8	873	l
1010	233	50	8.27821	1.57075	5.27674	10.7891	452.468	773.499	22.2784	0.772891	1.13079	0.0416166	1.7263	0.704281	3.91882	0.587096	30.0083	846.616	1.0831	1.4814	1.7263	0.52686	0.196446	0.525184	0.0325928	4.00521	0.333536	4.00482	0.438256	29.8906	841.196	1.02573	1.56966	4.00521	0.667344	0.0710334	0.330412	1.35e-06	8	2433	l
1011	194	43	7.43961	1.07681	5.46912	9.32512	234.524	778.231	19.8918	0.696796	1.46656	0.0416643	3.649	0.768599	8.88458	0.523049	23.9814	545.712	1.22566	1.67677	3.649	0.668313	0.258479	0.626175	0.0379684	10.3269	0.364477	9.12474	0.409602	23.1987	506.932	1.18145	1.70282	10.3269	0.849431	0.147429	0.487239	1.04e-06	7	2096	l
1012	183	43	7.25694	0.840348	5.68375	8.83455	424.991	775.656	17.3175	0.589359	-0.55186	0.0556806	1.32722	0.783158	4.06033	0.648152	30.2416	859.218	1.11594	1.45109	1.32722	0.487081	0.277018	0.610635	0.0513043	2.67606	0.516071	3.76493	0.513466	30.1972	858.238	1.04493	1.46704	2.67606	0.597512	0.143964	0.451157	1.33e-06	7	2433	l
1013	197	48	7.45252	0.859679	5.15106	9.10541	378.768	780.857	18.2947	0.577939	0.532232	0.0572276	2.21225	0.734677	5.16898	0.594474	26.5	659.287	1.10664	1.48892	2.21225	0.58223	0.23848	0.576011	0.0486063	4.69079	0.403713	4.93333	0.468394	26.3092	648.802	1.05531	1.48169	4.69079	0.711565	0.115936	0.408279	1.26e-06	10	2433	l
1014	174	46	7.10384	1.04482	4.41197	9.42869	410.596	782.31	17.3929	0.549052	-0.727831	0.031186	2.71661	0.782975	7.25875	0.537197	24.4984	563.155	1.24247	1.6758	2.71661	0.610691	0.261416	0.629175	0.0270383	7.26119	0.457234	7.68906	0.381765	24.1866	548.15	1.19408	1.75095	7.26119	0.785938	0.141548	0.483852	1.31e-06	8	2433	l
1015	203	43	7.63257	0.915085	6.18884	9.36343	529.663	783.116	20.0016	0.653641	1.56002	0.0175915	3.96185	0.818977	11.943	0.449547	23.4632	528.125	1.36537	1.89295	3.96185	0.675011	0.25741	0.65449	0.0168782	10.6522	0.50059	11.6648	0.30576	22.6398	487.271	1.30284	1.90466	10.6522	0.860113	0.146839	0.510434	1.31e-06	13	1523	l
1016	197	43	7.47429	0.741174	5.66545	8.59176	779.416	783.357	18.2061	0.562527	1.29651	0.0362853	1.93671	0.788875	5.58664	0.582597	27.4782	708.33	1.17382	1.5716	1.93671	0.557016	0.270715	0.623405	0.0273909	5.20497	0.455009	5.77528	0.42931	27.2919	698.015	1.13626	1.6683	5.20497	0.720399	0.120834	0.439427	8.73e-07	8	281	l
1017	178	41	7.13638	0.893548	5.44422	8.80163	734.708	784.086	17.8005	0.580425	0.665323	0.0571388	3.26489	0.717146	6.77134	0.542836	25.4436	609.13	1.16787	1.60828	3.26489	0.650648	0.21916	0.571743	0.0535528	7.36296	0.317092	6.39089	0.436444	24.8296	577.106	1.104	1.57586	7.36296	0.799055	0.124313	0.434177	1.06e-06	10	223	l
1018	232	48	8.13765	0.380838	7.383	8.96802	394.951	786.958	18.722	0.160691	-1.27316	0.0384102	3.90995	0.793024	10.4454	0.518856	19.9834	383.875	1.27503	1.74886	3.90995	0.681293	0.253251	0.63069	0.0261891	10.8677	0.436067	10.6356	0.381156	19.4392	359.207	1.23113	1.79916	10.8677	0.869277	0.132162	0.474107	1.29e-06	9	2433	l
1019	288	54	9.14089	0.697879	7.48416	11.0627	35.4794	793.604	21.2793	0.442007	-1.1324	0.0411842	1.75735	0.863329	7.42913	0.613575	23.4483	517.101	1.24155	1.59811	1.75735	0.535292	0.338597	0.691869	0.0311828	4.23361	0.646469	6.9876	0.479279	23.0205	496.305	1.18958	1.66395	4.23361	0.681315	0.210417	0.569049	8.85e-07	9	8589	l
1020	316	56	9.71293	1.32207	6.88427	12.1963	199.283	795.941	24.6463	0.669862	-0.742859	0.0535577	1.89329	0.802377	5.79015	0.604174	25.8709	628.951	1.13868	1.50222	1.89329	0.553603	0.271192	0.613031	0.0439004	4.40076	0.465158	5.11408	0.471847	25.3626	601.599	1.08207	1.56686	4.40076	0.697682	0.111105	0.410287	1.07e-06	10	807	l
1021	242	49	8.32818	0.676223	6.98544	9.73215	373.514	795.404	19.4163	0.263994	-1.45572	0.0345713	3.33409	0.84207	11.5556	0.521248	20.8341	419.536	1.3239	1.76073	3.33409	0.655593	0.312091	0.691762	0.0248784	8.16923	0.495379	9.09442	0.384201	19.6769	363.768	1.24979	1.79285	8.16923	0.80292	0.153352	0.507472	1.25e-06	9	2433	l
1022	264	55	8.79417	1.82167	5.91136	11.8865	84.9364	799.262	26.1603	0.81133	1.5367	0.0192892	3.56296	0.845456	12.5273	0.479995	21.1883	435.196	1.37295	1.87221	3.56296	0.658295	0.277635	0.673164	0.0155505	10.9593	0.532835	12.7296	0.314027	20.4615	401.907	1.33176	1.93843	10.9593	0.854624	0.154464	0.526398	1.13e-06	13	8589	l
1023	195	42	7.44216	0.620618	6.19066	8.56852	574.047	796.319	18.616	0.565797	-0.188172	0.020499	3.13617	0.823027	9.86058	0.471091	24.2993	559.637	1.33561	1.82108	3.13617	0.625348	0.282843	0.671674	0.0179188	8.87097	0.511453	10.0789	0.315762	23.7097	530.006	1.29179	1.84833	8.87097	0.814836	0.158989	0.522782	1.21e-06	10	235	l
1024	304	55	9.43676	1.44499	7.1583	12.7331	717.446	801.459	23.9422	0.698664	1.47509	0.0630994	1.33513	0.742539	3.59287	0.651695	28.4534	759.272	1.06298	1.38933	1.33513	0.492181	0.245993	0.568101	0.0484996	2.79528	0.376732	3.24244	0.522421	28.1496	744.132	0.984228	1.47489	2.79528	0.618674	0.0831017	0.346468	1.05e-06	12	2530	l
1025	245	47	8.443	0.959854	6.70398	10.0078	764.682	802.46	21.9108	0.647789	1.12424	0.032105	4.04139	0.795632	10.8875	0.490539	22.0123	464.939	1.28961	1.77247	4.04139	0.68581	0.250861	0.631309	0.0254761	11.566	0.471762	11.9478	0.347726	22.0377	464.278	1.25186	1.77385	11.566	0.865258	0.1378	0.480512	9.19e-07	10	812	l
1026	230	55	8.20988	1.98992	4.72727	11.8353	172.742	801.245	23.2755	0.737513	-0.534789	0.0306027	2.26335	0.821626	7.34438	0.54495	25.6905	621.372	1.23123	1.63464	2.26335	0.578258	0.290185	0.652567	0.0264327	5.37143	0.549429	6.96069	0.395178	24.88	579.71	1.18953	1.68472	5.37143	0.728847	0.155535	0.497323	1.11e-06	10	807	l
1027	200	43	7.53093	0.509589	6.48987	8.51141	525.324	803.029	18.1489	0.406804	1.46181	0.0311318	4.52282	0.772368	10.9345	0.483095	21.6902	450.77	1.30503	1.78774	4.52282	0.70391	0.258274	0.64149	0.0241998	10.5605	0.424176	10.1699	0.377108	20.879	412.081	1.23308	1.78011	10.5605	0.850338	0.160343	0.516505	1.31e-06	12	1523	l
1028	311	55	9.68042	1.19441	7.58042	11.8171	729.053	814.583	24.9594	0.701736	-0.857773	0.0277629	1.88045	0.853523	7.41893	0.56929	24.5524	565.688	1.27377	1.66724	1.88045	0.540749	0.316464	0.682424	0.0220311	4.81855	0.559839	6.47362	0.398849	23.8185	528.473	1.20446	1.75401	4.81855	0.698594	0.138478	0.479258	1.01e-06	10	2530	l
1029	238	46	8.28706	0.64775	7.01339	9.56514	11.9263	816.656	20.0769	0.515921	0.282807	0.0323855	2.97465	0.791614	8.13735	0.512353	23.4885	520.946	1.23153	1.6967	2.97465	0.624649	0.235755	0.603799	0.0307153	7.48454	0.438278	7.66213	0.377123	22.9691	494.972	1.15604	1.71549	7.48454	0.78767	0.120184	0.443806	7.06e-07	7	566	l
1030	269	61	8.9849	2.06307	4.6305	12.5685	56.5532	824.01	24.7327	0.738203	1.18025	0.0247811	2.85552	0.834843	9.64486	0.513935	23.7905	537.462	1.30189	1.76334	2.85552	0.619622	0.272109	0.6528	0.0209525	7.45274	0.497964	8.42251	0.349515	22.4478	472.077	1.23834	1.82904	7.45274	0.783421	0.127149	0.468948	1.02e-06	14	8589	l
1031	296	54	9.25186	0.829882	7.93442	10.8112	646.859	824.313	23.6815	0.597083	-1.54613	0.0262503	3.69541	0.843755	12.8257	0.489631	21.2459	439.722	1.34325	1.80234	3.69541	0.669884	0.301062	0.687066	0.021208	11.5494	0.512786	12.8525	0.359614	20.7984	415.996	1.30135	1.87762	11.5494	0.868317	0.167917	0.539629	1.02e-06	7	3014	l
1032	150	42	6.45089	0.988308	4.69344	8.28825	397.583	823.999	16.9026	0.661808	-1.20348	0.0416469	2.77273	0.709237	5.76802	0.547454	25.4394	606.636	1.14255	1.57536	2.77273	0.619786	0.207123	0.552359	0.0358333	8.09167	0.263499	6.49332	0.3914	25.5417	610.706	1.11169	1.62583	8.09167	0.810631	0.078283	0.352224	1.28e-06	13	717	l
1033	166	39	6.8479	0.552652	5.60273	7.98593	545.216	824.692	16.4168	0.460353	0.837038	0.0303356	3.41821	0.765215	8.27946	0.491562	25.3339	606.289	1.23848	1.71372	3.41821	0.656381	0.229326	0.598723	0.0222455	9.54135	0.35778	8.42842	0.323369	24.9098	582.688	1.19236	1.80019	9.54135	0.831994	0.0984379	0.412361	1.27e-06	14	690	l
1034	245	58	8.52241	1.74816	5.82965	12.1777	706.717	826.22	23.5181	0.7213	-0.617561	0.0193679	3.83904	0.830089	12.2972	0.467827	23.2203	519.521	1.3532	1.85553	3.83904	0.674128	0.273715	0.666928	0.0175038	9.81865	0.51243	11.069	0.334297	22.5026	480.944	1.27792	1.8726	9.81865	0.849205	0.152412	0.515542	1.01e-06	10	2530	l
1035	217	49	7.97085	1.23867	5.50813	10.7235	350.075	828.556	20.3951	0.627126	-0.97899	0.0244828	3.03484	0.835877	10.2456	0.506111	22.8181	496.361	1.31427	1.7927	3.03484	0.632004	0.274768	0.659587	0.0213741	7.35673	0.493623	8.26408	0.367692	21.8596	448.469	1.20126	1.79396	7.35673	0.78474	0.153027	0.507105	1.2e-06	11	3175	l
1036	166	40	6.87117	0.924076	5.29699	8.52397	525.049	828.042	18.0917	0.689715	1.27227	0.0252836	3.17568	0.77333	8.00506	0.483588	25.9932	637.022	1.25103	1.72792	3.17568	0.63576	0.242685	0.616046	0.0199451	10.0741	0.361951	8.89443	0.33069	25.8074	625.924	1.22244	1.79657	10.0741	0.841807	0.117552	0.448315	1.3e-06	12	224	l
1037	322	67	9.89855	2.40062	4.90071	14.3585	171.914	834.699	28.4756	0.770074	0.544687	0.0253817	2.8094	0.862715	11.232	0.544948	24.0111	553.308	1.31332	1.77117	2.8094	0.617926	0.295008	0.676927	0.0182058	7.34717	0.646842	11.4021	0.385939	23.4377	524.42	1.2982	1.89159	7.34717	0.790544	0.153202	0.519001	1.09e-06	10	688	l
1038	204	44	7.65638	0.559235	6.32986	8.82011	26.311	834.254	18.1557	0.437198	1.03529	0.0332133	3.45245	0.762446	8.26665	0.52783	22.6562	483.931	1.24791	1.70743	3.45245	0.650525	0.241938	0.612339	0.0321108	6.94268	0.401522	6.80028	0.413937	21.6306	434.941	1.16883	1.66536	6.94268	0.766074	0.124522	0.445419	8.16e-07	9	551	l
1039	195	46	7.44191	1.08362	5.56271	9.28933	404.804	836.22	20.0127	0.688519	-1.50149	0.0197431	3.83119	0.796631	10.4193	0.463284	22.1288	466.106	1.3379	1.8644	3.83119	0.672918	0.248635	0.641108	0.0157051	11.7545	0.450666	11.6989	0.310743	22.1377	465.724	1.28867	1.87738	11.7545	0.865051	0.14609	0.506086	1.28e-06	8	717	l
1040	187	41	7.31825	0.744258	5.63842	8.58738	94.3587	835.376	18.1526	0.605677	0.498037	0.0539753	1.26449	0.729527	3.33755	0.641928	17.529	279.96	1.04035	1.38437	1.26449	0.479698	0.225989	0.545174	0.046156	2.78378	0.426259	3.426	0.486169	17.2297	270.16	1.00506	1.44212	2.78378	0.597669	0.0843366	0.345322	1.14e-06	13	8589	l
1041	228	59	8.18704	1.10168	5.92147	10.1512	614.986	836.672	19.4776	0.372076	-0.585295	0.0186544	3.12547	0.842935	10.9496	0.497102	24.7379	584.234	1.33786	1.83504	3.12547	0.632886	0.269113	0.65941	0.0175956	8.98315	0.528704	10.5303	0.331384	23.9494	543.597	1.26775	1.83406	8.98315	0.829747	0.14046	0.491935	1.06e-06	9	3014	l
1042	78	26	4.56044	0.5676	3.38483	5.50484	724.481	834.052	11.3582	0.572006	1.27094	0.0407053	1.78788	0.65647	3.60222	0.537879	33.3485	1052.63	1.03736	1.43844	1.78788	0.509531	0.171084	0.485741	0.0399306	4.35417	0.104566	3.43132	0.414093	32.5625	1004.94	0.946469	1.44986	4.35417	0.663266	0.073109	0.322775	9.85e-07	7	2530	l
1043	204	43	7.64014	0.462007	6.6749	8.65466	196.515	837.873	17.9444	0.454913	1.03257	0.0356178	2.14499	0.790794	6.12649	0.563419	25.9715	631.856	1.20271	1.601	2.14499	0.573133	0.273084	0.630322	0.0274195	5.18354	0.422296	5.48633	0.423106	25.2595	594.782	1.13439	1.67352	5.18354	0.719329	0.128654	0.453377	1.05e-06	10	457	l
1044	230	47	8.17338	1.10223	6.37166	10.2107	121.943	841.797	21.5066	0.662384	1.19271	0.034489	3.86451	0.788132	10.1201	0.511259	20.9197	418.317	1.28039	1.73818	3.86451	0.682559	0.264741	0.641572	0.0243959	9.82258	0.426199	9.55922	0.385994	20.1022	380.862	1.22232	1.81223	9.82258	0.83883	0.153465	0.50999	1.14e-06	12	1931	l
1045	221	57	8.19416	1.66421	4.69025	12.1272	330.269	847.2	21.5871	0.723256	1.55396	0.0383577	1.59435	0.784997	4.70774	0.608593	29.543	820.109	1.1375	1.53143	1.59435	0.515896	0.247745	0.592849	0.0339578	4.05455	0.413359	4.45573	0.467889	29.0364	792.867	1.05247	1.57904	4.05455	0.670889	0.141551	0.462381	1.16e-06	13	1882	l
1046	252	51	8.50307	0.820288	6.79428	9.88192	356.588	844.573	19.993	0.526421	1.46756	0.0423907	1.59304	0.749343	4.17772	0.596902	27.7149	718.738	1.11378	1.50108	1.59304	0.515748	0.224268	0.561752	0.0309156	3.92611	0.373637	4.13405	0.445763	27.4335	704.604	1.0518	1.60272	3.92611	0.67098	0.065386	0.32043	1.21e-06	12	3175	l
1047	235	48	8.21797	0.88859	6.50067	9.92935	145.266	850.535	21.3993	0.63782	1.09685	0.0310613	3.7178	0.796178	10.1202	0.51147	20.4321	398.059	1.31937	1.77664	3.7178	0.666422	0.277506	0.6602	0.023813	8.32973	0.472349	8.89321	0.372967	19.3892	352.591	1.24125	1.80767	8.32973	0.808662	0.151022	0.505658	1.12e-06	8	1931	l
1048	219	44	7.98243	0.782876	6.69529	9.74958	509.297	850.504	20.1024	0.59753	-1.24327	0.0412412	3.45283	0.816244	10.3951	0.505138	23.322	521.116	1.2542	1.67679	3.45283	0.662648	0.269931	0.63828	0.0410792	10.3209	0.483758	10.9961	0.402385	23.2299	515.415	1.19019	1.70118	10.3209	0.851446	0.172215	0.523704	1.31e-06	13	979	l
1049	160	40	6.74127	1.0964	4.69874	8.69069	295.664	852.044	18.4794	0.73818	1.26575	0.0316545	3.27241	0.750401	7.55533	0.501537	23.9895	541.301	1.22211	1.6706	3.27241	0.645946	0.239179	0.604004	0.0284534	9.21311	0.3122	7.69753	0.369718	23.1148	499.677	1.15797	1.70815	9.21311	0.810546	0.113172	0.43044	1.09e-06	10	229	l
1050	180	41	7.12794	0.455301	6.10955	8.12913	415.127	850.809	16.9521	0.468725	0.906635	0.0526016	2.97991	0.717844	6.2806	0.54734	24.6739	571.435	1.1517	1.5719	2.97991	0.636317	0.214303	0.56061	0.0501891	5.91971	0.309682	5.28767	0.437602	23.9489	535.794	1.04557	1.49922	5.91971	0.742318	0.0943128	0.37136	1.28e-06	7	717	l
1051	207	51	7.8011	1.37568	5.30587	10.9962	573.828	851.884	19.4603	0.58243	-0.545322	0.0212467	2.79728	0.799448	7.97397	0.504487	26.1306	643.108	1.27082	1.74971	2.79728	0.609842	0.238894	0.614756	0.0180232	6.71605	0.464925	7.2758	0.363438	25.6049	613.654	1.20684	1.82742	6.71605	0.768337	0.101796	0.421886	1.17e-06	12	648	l
1052	281	56	9.21114	1.80635	5.84463	13.1019	132.197	859.421	26.065	0.784461	1.11236	0.0338376	2.15152	0.886275	10.4593	0.578898	23.3695	523.426	1.28464	1.67992	2.15152	0.575793	0.335008	0.700973	0.0255802	5.32889	0.696368	9.77525	0.437923	22.5822	485.208	1.24127	1.76886	5.32889	0.739201	0.215749	0.589952	1.12e-06	11	1931	l
1053	270	72	8.84148	2.26098	4.06299	12.3043	675.817	858.328	22.7099	0.54934	-0.207049	0.0235427	2.68063	0.863777	10.8391	0.521816	27.0764	700.005	1.32126	1.77168	2.68063	0.604274	0.292877	0.674915	0.0182944	6.94366	0.645894	10.8045	0.357751	26.615	673.197	1.29857	1.86887	6.94366	0.764393	0.178248	0.553445	9.71e-07	8	2530	l
1054	182	42	7.20587	1.10092	4.68346	9.04652	537.188	857.266	19.3132	0.668933	-1.3752	0.0202127	4.99387	0.760488	11.4251	0.43085	22.2331	474.057	1.32019	1.84652	4.99387	0.719607	0.236709	0.625216	0.0190222	14.2333	0.386501	12.6001	0.304755	22.1133	466.178	1.2804	1.86138	14.2333	0.915891	0.140119	0.494537	1.27e-06	12	237	l
1055	96	29	5.08768	0.542054	3.97764	6.01959	231.131	860.354	12.7016	0.581466	-1.43764	0.0434963	1.83686	0.691623	3.97827	0.556069	27.9517	731.867	1.0855	1.46857	1.83686	0.531352	0.20739	0.536739	0.0311182	4.64935	0.259695	4.14016	0.384533	27.8961	729.632	1.03125	1.55374	4.64935	0.672178	0.0833392	0.35551	1.03e-06	8	152	l
1056	216	48	7.84764	0.861521	5.73598	9.83327	391.95	863.276	19.4198	0.518347	1.1512	0.0421017	3.44015	0.797013	9.47383	0.515117	21.0746	423.431	1.25103	1.72689	3.44015	0.661801	0.251756	0.625993	0.0309156	9.31034	0.452454	9.50188	0.382333	20.6552	402.357	1.2217	1.77605	9.31034	0.832129	0.140725	0.485534	1.25e-06	9	3175	l
1057	204	45	7.72063	1.26365	5.55333	9.99086	556.422	864.26	20.553	0.721692	-1.19596	0.050741	2.83515	0.772879	7.24149	0.518876	24.9632	588.246	1.17004	1.58684	2.83515	0.623617	0.242405	0.595388	0.0394888	6.82692	0.344614	6.20832	0.385963	24.0064	539.134	1.09075	1.64582	6.82692	0.772463	0.0844075	0.367441	1.22e-06	13	2757	l
1058	355	69	10.672	2.71468	6.0588	16.5016	50.5036	873.41	29.884	0.813039	-1.28112	0.0444597	2.51889	0.810673	7.65223	0.586194	21.4348	432.091	1.2358	1.64354	2.51889	0.59842	0.283071	0.646825	0.0285726	6.88502	0.484588	7.67914	0.420046	20.892	407.824	1.19446	1.74858	6.88502	0.776544	0.125871	0.45753	9.53e-07	12	8589	l
1059	199	44	7.55763	0.867831	6.11571	9.36104	336.709	865.986	19.549	0.601559	1.41832	0.0195794	4.50978	0.796659	12.0892	0.463608	20.8478	419.865	1.35372	1.88564	4.50978	0.703902	0.250116	0.645517	0.0168739	9.04575	0.52991	10.6213	0.312238	19.8431	373.853	1.28476	1.86141	9.04575	0.811625	0.158521	0.523637	1.17e-06	14	1882	l
1060	316	66	9.91034	2.59144	4.80466	13.9803	360.391	880.79	29.0622	0.836249	-1.54664	0.0333283	2.32985	0.742504	5.52405	0.564446	25.2054	592.083	1.19881	1.63821	2.32985	0.581439	0.228887	0.587536	0.0258823	5.2179	0.391351	5.28646	0.405383	24.7977	571.705	1.13806	1.72415	5.2179	0.714959	0.0961181	0.399722	1.2e-06	10	3175	l
1061	180	45	7.33213	1.19584	4.92938	9.48618	116.404	874.016	17.351	0.472175	0.287742	0.0864468	1.15591	0.6871	2.84709	0.678833	17.9748	295.692	0.961306	1.23717	1.15591	0.472229	0.219018	0.5122	0.0899281	1.98561	0.348526	2.52394	0.591198	17.6978	287.412	0.866271	1.22855	1.98561	0.557185	0.0678742	0.287569	1.11e-06	8	1931	l
1062	188	44	7.29427	0.866168	5.44791	9.52259	382.357	874.427	17.7476	0.534165	-0.0619964	0.0324587	1.75186	0.8049	5.48963	0.562285	26.6166	663.68	1.17115	1.56	1.75186	0.522732	0.272632	0.623589	0.0245412	4.77632	0.487897	5.66343	0.401904	26.3684	650.238	1.14224	1.66252	4.77632	0.700272	0.107621	0.415084	1.23e-06	10	3175	l
1063	263	52	8.79432	1.42755	6.07065	10.9951	211.123	883.259	24.1407	0.735371	-1.03373	0.0282033	3.39416	0.846101	12.0273	0.492913	22.3785	483.77	1.32964	1.81496	3.39416	0.657137	0.280638	0.668616	0.0262905	9.73364	0.539328	11.5646	0.36242	21.5748	443.883	1.29279	1.84304	9.73364	0.84935	0.148799	0.506385	1.03e-06	9	466	l
1064	255	52	8.56921	0.635948	7.55307	10.0063	459.002	882.44	20.6098	0.420824	0.575892	0.0435246	3.59849	0.818885	10.9343	0.520062	20.9634	423.971	1.26995	1.71085	3.59849	0.66685	0.278138	0.651626	0.0329079	10.1268	0.493892	11.0045	0.40058	20.6056	404.969	1.23871	1.75334	10.1268	0.844972	0.16938	0.526386	1.29e-06	9	2816	l
1065	293	61	9.22283	1.68153	5.56455	11.7744	556.768	883.073	24.502	0.671427	-0.189151	0.0211983	2.49154	0.870609	10.628	0.534011	24.3487	565.592	1.33626	1.78127	2.49154	0.59366	0.311055	0.693641	0.016884	6.4359	0.630912	9.71864	0.376465	23.6581	528.827	1.28876	1.8772	6.4359	0.764728	0.173649	0.54791	1.2e-06	12	2757	l
1066	254	52	8.6177	1.49646	6.09979	11.2428	181.192	886.913	24.0335	0.756427	-1.54163	0.0198688	2.90476	0.842504	10.2217	0.480661	22.9762	501.868	1.34553	1.82914	2.90476	0.613516	0.287099	0.677027	0.0170975	8.1619	0.528805	9.66086	0.324903	22.1524	462.18	1.27899	1.86921	8.1619	0.804672	0.175144	0.549078	1.04e-06	7	373	l
1067	272	52	8.93923	1.61034	5.70062	11.6238	286.912	887.112	25.0115	0.7425	-1.14422	0.0209294	3.15594	0.856131	11.9681	0.492974	22.9306	506.513	1.34826	1.83749	3.15594	0.635296	0.279132	0.670105	0.0166025	9.55111	0.557655	11.796	0.341609	22.0844	464.834	1.31907	1.92351	9.55111	0.835337	0.145595	0.510581	1.09e-06	8	1124	l
1068	255	53	8.62467	1.13314	6.13149	11.0099	60.8072	889.982	22.1874	0.61268	0.468795	0.0257782	3.52649	0.796903	9.68178	0.513892	20.5968	403.663	1.29748	1.78545	3.52649	0.658118	0.254532	0.637111	0.0191981	9.22535	0.484387	9.946	0.377614	20.0047	378.09	1.25554	1.86077	9.22535	0.815252	0.142115	0.497734	9.87e-07	11	8589	l
1069	282	53	9.02246	0.758884	7.57854	10.583	476.124	890.112	22.3112	0.515867	-0.949598	0.0290884	3.11122	0.855839	11.7908	0.531112	21.9159	464.242	1.31999	1.77126	3.11122	0.644776	0.298785	0.680605	0.0197681	8.69828	0.576534	11.2703	0.375626	21.3017	433.377	1.2769	1.86164	8.69828	0.829158	0.159942	0.52582	1.29e-06	11	2816	l
1070	332	64	10.3016	2.41324	5.57961	14.8632	19.3294	893.916	29.0195	0.814184	1.00619	0.0199841	2.24979	0.871023	9.7217	0.532936	24.0157	547.014	1.33577	1.78579	2.24979	0.570938	0.306498	0.689981	0.0145256	6.87273	0.615783	9.9438	0.365262	23.3455	514.511	1.30892	1.92593	6.87273	0.773928	0.160926	0.534909	7.33e-07	8	2099	l
1071	209	49	7.8283	1.21135	5.82792	10.1492	530.657	892.814	21.0387	0.694138	-1.1925	0.0167774	4.34358	0.822796	13.2559	0.440073	22.3944	486.179	1.38252	1.91587	4.34358	0.693071	0.264913	0.665515	0.0149805	11.6312	0.477427	12.1288	0.304498	21.3313	433.482	1.31632	1.91122	11.6312	0.851088	0.14581	0.509528	1.26e-06	12	2757	l
1072	246	53	8.48669	1.51281	5.95808	11.3357	546.085	901.48	23.2374	0.733138	-1.29909	0.0304126	3.89562	0.806788	11.0812	0.510883	21.431	441.903	1.2946	1.75892	3.89562	0.676901	0.265077	0.644815	0.034139	9.64583	0.455608	9.85927	0.394761	20.5208	399.48	1.1898	1.64764	9.64583	0.828106	0.136702	0.463417	1.22e-06	13	2757	l
1073	311	75	10.3882	4.17071	0.525442	17.7376	703.062	906.515	34.1171	0.902441	-1.37965	0.0310684	2.27248	0.859357	9.0789	0.573256	30.5081	886.677	1.23979	1.67231	2.27248	0.574545	0.274823	0.642683	0.0231883	5.80992	0.641822	9.11037	0.438392	30.3471	875.547	1.21096	1.77366	5.80992	0.736941	0.168865	0.528213	9.37e-07	7	817	l
1074	253	50	8.54825	0.879857	6.15575	10.0087	159.824	903.096	20.3041	0.512817	-1.05635	0.0371101	2.64674	0.699918	5.41003	0.552537	25.5098	607.367	1.17106	1.62244	2.64674	0.61198	0.200818	0.551221	0.0259428	6.35681	0.354346	5.92277	0.407767	25.3803	600.688	1.1449	1.72005	6.35681	0.759712	0.0891513	0.385073	1.04e-06	8	1420	l
1075	428	76	11.3563	1.98139	7.70101	14.8604	71.886	909.314	29.6412	0.641746	-0.279055	0.0302897	2.93295	0.866193	11.9596	0.590919	22.3194	482.042	1.31617	1.74737	2.93295	0.613966	0.325127	0.701834	0.0210538	8.44415	0.64043	12.742	0.435281	22.242	477.132	1.29904	1.85136	8.44415	0.792939	0.203946	0.585876	1e-06	10	8589	l
1076	222	48	8.00757	1.02315	6.07409	9.86253	523.59	910.786	20.8335	0.633855	-1.29672	0.043554	4.18408	0.803652	11.6548	0.505729	20.7935	419.188	1.28065	1.73278	4.18408	0.69902	0.274712	0.651225	0.0509902	10.7253	0.47668	11.2473	0.401829	20.2088	391.563	1.20092	1.67563	10.7253	0.860726	0.166257	0.511882	1.25e-06	11	2757	l
1077	323	84	10.7597	3.25955	6.13899	18.2482	25.4512	920.161	33.5595	0.888891	1.43415	0.0228609	2.277	0.872386	9.92147	0.545609	26.0226	644.485	1.3027	1.73832	2.277	0.572096	0.310999	0.687598	0.0192509	6.20233	0.675606	10.5599	0.376483	25.3385	610.268	1.29208	1.82024	6.20233	0.756461	0.182971	0.55399	7.54e-07	7	2099	l
1078	200	44	7.59486	0.737779	6.06788	9.4629	554.506	916.5	19.0535	0.592455	0.75539	0.0207256	3.0208	0.811648	9.01904	0.49221	24.0388	545.563	1.31203	1.7923	3.0208	0.624495	0.264311	0.648582	0.0178041	7.73913	0.50943	8.88789	0.325631	23.5528	520.957	1.25605	1.83766	7.73913	0.783206	0.183516	0.556929	1.18e-06	10	2757	l
1079	233	51	8.19427	1.05098	5.72955	10.2242	183.8	918.584	20.2775	0.641938	-0.911051	0.0627436	1.29739	0.738175	3.4776	0.651303	28.5438	765.422	1.03368	1.36366	1.29739	0.488554	0.233096	0.549711	0.0543415	2.94086	0.363975	3.31191	0.525541	28.2312	749.384	0.971748	1.4226	2.94086	0.625964	0.075607	0.325213	1e-06	8	1420	l
1080	245	49	8.36962	0.496038	7.40996	9.52276	167.349	919.836	18.7538	0.28761	1.36921	0.041987	2.6439	0.673761	5.05208	0.563507	24.5834	562.807	1.14751	1.58587	2.6439	0.606505	0.191748	0.53443	0.037433	6.45192	0.265617	5.39275	0.415246	24.4231	555.385	1.09358	1.61557	6.45192	0.733452	0.0762922	0.346804	1.01e-06	8	1420	l
1081	140	38	6.25314	1.18248	4.30116	7.90569	117.445	920.387	17.6864	0.772211	1.39298	0.0310287	3.47262	0.68893	6.58173	0.48794	25.5132	609.647	1.20696	1.67212	3.47262	0.654186	0.208978	0.568405	0.0310609	7.65094	0.26488	6.20388	0.368132	24.6698	567.74	1.12039	1.66685	7.65094	0.78947	0.0945621	0.39049	1.04e-06	10	199	l
1082	287	65	8.86947	2.33885	2.53604	12.8554	424.309	930.388	24.4589	0.665388	-1.31066	0.037142	2.64043	0.787898	7.22443	0.571876	23.8824	535.228	1.23355	1.63011	2.64043	0.611363	0.282161	0.643914	0.0243186	7.34034	0.48838	8.17362	0.423421	24.0546	543.125	1.21233	1.74182	7.34034	0.788931	0.145645	0.489259	1.18e-06	7	951	l
1083	127	38	5.98882	1.05775	4.25063	8.14115	439.825	924.679	15.6975	0.698477	-0.276799	0.0585841	1.40411	0.690982	3.27189	0.620911	29.8516	838.646	1.02518	1.3513	1.40411	0.497697	0.23578	0.550593	0.0564954	2.88636	0.323446	3.13314	0.49131	29.3864	815.009	0.937055	1.36003	2.88636	0.598706	0.0696602	0.30577	1.21e-06	8	951	l
1084	156	41	6.63216	1.0914	4.29338	8.63876	306.426	930.915	17.5649	0.685538	1.45671	0.0276613	3.00726	0.779836	7.8296	0.485936	24.1978	551.23	1.24312	1.71411	3.00726	0.622477	0.230793	0.600492	0.0188293	9.36719	0.422159	9.10533	0.309242	24.0234	543.229	1.21611	1.82426	9.36719	0.813451	0.117759	0.451757	1.1e-06	11	436	l
1085	335	66	10.1626	2.47675	6.76308	14.7467	694.791	938.99	30.7832	0.852318	1.5693	0.0215721	2.92741	0.891035	14.4328	0.528649	25.6827	642.214	1.36379	1.81647	2.92741	0.6315	0.316968	0.703922	0.021004	8.37681	0.669125	13.6586	0.385466	25.058	606.105	1.3125	1.84422	8.37681	0.81073	0.186096	0.561295	9.38e-07	8	817	l
1086	233	61	8.49639	2.1347	4.14793	11.9483	147.551	938.283	22.2997	0.63671	-0.0450749	0.0179137	3.82847	0.842785	13.1759	0.457883	21.8455	463.253	1.39122	1.9012	3.82847	0.664483	0.284603	0.684007	0.0166961	10.7584	0.531358	12.4783	0.312492	20.7697	412.852	1.33522	1.92117	10.7584	0.861698	0.150054	0.517465	9.88e-07	9	4080	l
1087	155	42	6.63432	0.922132	5.24788	8.63643	342.469	938.181	16.9189	0.671913	1.40886	0.0427669	1.38645	0.778429	4.12868	0.620545	28.3755	754.494	1.11072	1.45552	1.38645	0.488182	0.265932	0.600077	0.035488	3.768	0.439182	4.35938	0.431417	28.136	742.617	1.063	1.53222	3.768	0.645785	0.118299	0.41861	1.12e-06	9	2151	l
1088	350	67	10.3126	1.98829	6.78973	13.6632	436.436	945.034	26.7198	0.706575	0.296481	0.0668918	1.875	0.804955	5.80658	0.62058	24.2344	551.005	1.13343	1.47189	1.875	0.5536	0.287072	0.624038	0.0577778	4.35789	0.442837	4.91079	0.497274	23.6772	523.289	1.04969	1.51205	4.35789	0.688434	0.10376	0.390523	1.16e-06	8	951	l
1089	309	67	9.84124	3.2855	2.9367	14.6205	283.353	949.765	32.021	0.89076	1.49327	0.0403255	2.50402	0.791454	7.00353	0.565334	25.7391	624.418	1.18487	1.62142	2.50402	0.599658	0.243459	0.601688	0.0441983	6.03265	0.485334	6.86074	0.455509	25.0776	591.829	1.11051	1.64357	6.03265	0.750684	0.136018	0.461811	1.06e-06	11	445	l
1090	175	43	7.05103	0.786302	5.00135	8.53526	312.211	945.12	17.3725	0.473486	1.09306	0.0300006	4.00641	0.777342	9.99679	0.487812	19.9199	379.754	1.27119	1.7634	4.00641	0.687838	0.236765	0.614189	0.0268326	11.5217	0.394072	10.5075	0.348528	19.5507	363.622	1.19006	1.73623	11.5217	0.879299	0.14328	0.484834	1.09e-06	10	436	l
1091	247	60	8.38353	2.13269	2.46672	11.9311	85.6742	951.002	23.6751	0.682523	1.14937	0.024005	3.68977	0.838173	12.4004	0.513693	21.642	454.294	1.33484	1.82841	3.68977	0.666816	0.262209	0.651204	0.0198258	10.867	0.539579	12.8012	0.351042	21.468	443.609	1.28701	1.88055	10.867	0.848995	0.133886	0.486314	9.63e-07	10	1243	l
1092	194	42	7.43137	0.922946	5.62893	9.43494	348.553	953.786	19.1018	0.648835	1.38279	0.0346847	2.83977	0.764108	7.01923	0.540967	23.9814	538.863	1.23001	1.67059	2.83977	0.625727	0.255326	0.621884	0.0278497	7.56291	0.355492	6.8672	0.421165	23.2185	501.971	1.17166	1.74075	7.56291	0.799566	0.117699	0.442302	1.09e-06	9	2151	l
1093	269	52	8.85003	0.998844	6.84207	10.8187	411.608	962.401	21.8005	0.510701	-0.0574494	0.0316738	3.6297	0.813216	10.7163	0.497964	21.5727	447.138	1.27735	1.75782	3.6297	0.659858	0.244135	0.621809	0.0294267	8.76106	0.559238	10.9385	0.397548	21.3363	435.174	1.23204	1.77233	8.76106	0.82957	0.146955	0.495029	1.09e-06	6	386	l
1094	276	52	9.00459	0.878457	7.30855	10.6731	59.0302	967.042	21.8991	0.504729	0.637518	0.041536	3.3003	0.800112	9.25536	0.559861	20.1586	387.619	1.24039	1.67377	3.3003	0.644665	0.277836	0.645977	0.0327875	9.14163	0.483593	9.85119	0.421476	19.7167	369.218	1.1977	1.739	9.14163	0.813231	0.145234	0.488266	8.66e-07	10	891	l
1095	172	39	6.99012	0.569411	5.55565	8.05708	743.331	964.77	16.6933	0.419358	-0.538777	0.0285857	3.71429	0.78579	9.66974	0.490763	25.7045	627.857	1.27316	1.72772	3.71429	0.673539	0.264976	0.640353	0.0217074	9.58824	0.433261	9.45913	0.352585	25.3235	604.319	1.23887	1.82561	9.58824	0.847442	0.120874	0.457517	8.67e-07	9	206	l
1096	239	48	8.29888	0.848608	6.58693	10.096	573.371	968.178	20.8966	0.578102	1.4464	0.0420392	3.6908	0.796749	10.0794	0.507538	22.3138	477.245	1.22783	1.66886	3.6908	0.671702	0.261828	0.628609	0.0411823	9.26425	0.475201	9.82647	0.395516	21.5337	440.956	1.16422	1.68074	9.26425	0.842648	0.136149	0.466607	1.05e-06	6	387	l
1097	349	75	10.5213	2.47443	6.5396	15.6935	127.61	974.241	28.9643	0.774538	-0.620853	0.0222167	2.43128	0.848728	9.03613	0.548378	24.0632	546.823	1.32315	1.77082	2.43128	0.59303	0.294013	0.675908	0.0157799	6.51246	0.576758	8.69353	0.394367	23.3238	510.398	1.27534	1.91003	6.51246	0.775436	0.141765	0.502801	9.21e-07	8	4080	l
1098	317	67	9.74331	2.20078	4.55652	13.4175	105.455	976.151	26.3289	0.724532	0.453667	0.0309092	2.34057	0.772795	6.1508	0.527584	25.0252	585.852	1.20106	1.64511	2.34057	0.572463	0.228344	0.587895	0.0242699	6.23735	0.417538	6.3543	0.380765	24.6654	567.718	1.15925	1.74808	6.23735	0.748195	0.0785278	0.364889	9.22e-07	10	4080	l
1099	246	49	8.43893	1.10499	6.74403	10.8756	33.5763	980.366	22.5592	0.681728	1.4383	0.0262501	4.24219	0.791632	11.1796	0.489483	20.9029	419.663	1.32775	1.82463	4.24219	0.693068	0.259248	0.647516	0.0249283	11.7356	0.44951	11.6592	0.37674	20.6106	404.71	1.27645	1.81526	11.7356	0.885563	0.182469	0.552669	7.26e-07	9	317	l
1100	261	50	8.68463	0.753637	6.91587	10.1798	702.798	986.76	21.355	0.535698	1.43372	0.0304794	3.45236	0.818974	10.5355	0.51786	23.4984	528.147	1.28453	1.7381	3.45236	0.659683	0.281623	0.659022	0.0269763	9.51802	0.523769	10.9931	0.398364	23.4459	522.576	1.26213	1.80992	9.51802	0.834824	0.170911	0.535701	9.21e-07	12	298	l
1101	292	66	9.41343	2.57612	3.85054	13.8261	531.512	988.63	26.9702	0.753454	0.755487	0.0189753	2.9981	0.854283	11.2874	0.506028	24.3631	567.328	1.35928	1.85478	2.9981	0.62856	0.276208	0.669405	0.0150385	8.31489	0.586502	11.0543	0.357338	23.8553	540.268	1.30836	1.92041	8.31489	0.816172	0.164878	0.540219	1.09e-06	13	972	l
1102	254	56	8.66085	1.56234	5.41119	11.9147	57.0563	992.096	22.3606	0.628818	1.0502	0.0268637	3.10229	0.822301	9.72906	0.524026	23.0871	506.669	1.29589	1.76092	3.10229	0.643089	0.273094	0.653485	0.0201405	8.57005	0.519183	9.91197	0.383794	22.4444	475.575	1.26669	1.84705	8.57005	0.822274	0.143127	0.497785	8.07e-07	9	1944	l
1103	164	39	6.84205	0.806976	5.75097	8.32493	354.042	990.807	17.6741	0.6564	-1.32922	0.0208854	2.67521	0.806918	7.92766	0.46709	25.588	616.252	1.27308	1.7414	2.67521	0.58003	0.260227	0.637212	0.019989	7.29688	0.45743	7.72437	0.317754	25.0938	589.863	1.21358	1.77193	7.29688	0.768928	0.130147	0.467542	9.95e-07	8	2151	l
1104	298	58	9.29819	1.33696	7.00229	12.4609	737.794	1005.11	24.4116	0.660108	1.54186	0.0202702	2.50826	0.878911	11.3571	0.51883	26.3725	665.451	1.34188	1.7878	2.50826	0.590653	0.315554	0.698717	0.0150678	7.09664	0.637572	10.7904	0.349701	25.4916	617.34	1.29914	1.90249	7.09664	0.77745	0.17302	0.550056	8.34e-07	10	372	l
1105	225	48	8.13822	1.36926	5.45042	10.3661	588.769	1001.53	22.21	0.728356	-0.614139	0.0354824	3.69165	0.800604	10.2571	0.493244	23.4042	523.571	1.26294	1.7073	3.69165	0.671633	0.267724	0.640355	0.0265065	10	0.427756	9.73753	0.352635	22.9231	496.34	1.21157	1.76192	10	0.847576	0.120116	0.449009	9.64e-07	7	272	l
1106	194	46	7.47894	1.19538	5.40186	9.49861	266.062	1005.25	20.1858	0.741483	1.2748	0.0692762	2.75036	0.712057	5.77588	0.57373	23.8752	535.321	1.0943	1.48234	2.75036	0.618278	0.217039	0.550403	0.0595111	5.36667	0.379833	5.32679	0.47939	23.4467	513.917	1.04182	1.53513	5.36667	0.733804	0.0977317	0.382004	9.25e-07	11	959	l
1107	200	43	7.57154	0.791402	6.1681	9.05404	387.443	1007.32	19.5259	0.631192	0.302676	0.0389903	4.09141	0.748413	9.13121	0.510105	21.2659	429.666	1.23515	1.70648	4.09141	0.692068	0.227316	0.595357	0.0407927	9.67516	0.383657	8.84885	0.392281	20.6815	402.399	1.17055	1.71804	9.67516	0.84535	0.133449	0.466705	9.4e-07	9	275	l
1108	251	50	8.49947	0.610032	7.40316	9.78401	686.952	1010.72	20.6035	0.470878	0.932343	0.0272704	3.65137	0.830632	11.7794	0.501427	22.7071	495.417	1.35409	1.82928	3.65137	0.669971	0.280566	0.670469	0.0166888	9.38389	0.540132	11.2028	0.333845	22.3697	475.4	1.29902	1.91882	9.38389	0.827103	0.166299	0.54215	8.94e-07	11	765	l
1109	249	49	8.53744	0.866888	7.10946	10.6222	219.606	1013.83	21.3	0.574721	-0.652817	0.0264706	2.54746	0.856755	9.89196	0.537229	21.8389	454.467	1.30969	1.74144	2.54746	0.592767	0.300887	0.678463	0.0203505	7.27053	0.611227	10.3506	0.381953	21.6087	444.097	1.26255	1.84238	7.27053	0.787154	0.166411	0.533147	8.41e-07	9	7564	l
1110	241	50	8.31585	0.827864	6.97002	10.4049	545.935	1019.73	19.3073	0.424815	1.27914	0.0393611	1.72311	0.781061	4.93513	0.596783	26.9703	680.097	1.16174	1.5386	1.72311	0.531252	0.26363	0.610941	0.0296967	4.40102	0.413929	4.75468	0.43634	26.6345	662.326	1.10595	1.62223	4.40102	0.6846	0.106732	0.408842	9.67e-07	11	1853	l
1111	182	50	7.53341	1.69581	4.57515	10.3601	369.067	1019.91	19.796	0.731291	1.10461	0.0354945	2.62715	0.777748	6.9103	0.515331	24.8955	582.471	1.20039	1.62884	2.62715	0.603298	0.243204	0.602492	0.0285917	6.57971	0.412413	6.59893	0.374966	24.2609	549.454	1.16025	1.68972	6.57971	0.743219	0.109673	0.421952	8.89e-07	10	1226	l
1112	249	52	8.5709	1.38545	6.07841	11.4918	569.666	1021.56	22.9875	0.705858	-1.20589	0.0257336	3.01215	0.864631	12.1257	0.515732	24.389	574.16	1.30932	1.76496	3.01215	0.635396	0.292839	0.673945	0.0213412	8.03077	0.611825	11.3443	0.401668	23.4667	525.435	1.28359	1.82374	8.03077	0.808306	0.176439	0.545309	9.34e-07	9	385	l
1113	222	56	8.13535	1.84838	4.26651	11.5088	234.269	1023.51	23.2298	0.791283	1.34001	0.0222793	3.61111	0.778273	9.14315	0.48366	22.7475	489.172	1.29495	1.78414	3.61111	0.662806	0.246761	0.628343	0.0186112	8.86364	0.471168	9.38039	0.354598	22.2159	464.209	1.25043	1.8512	8.86364	0.818421	0.137514	0.489062	8.24e-07	10	7564	l
1114	235	49	8.23249	0.786942	7.12818	10.1315	620.691	1024.58	19.1644	0.380858	1.37481	0.0215225	3.43611	0.808602	9.97635	0.503462	22.8406	495.258	1.32803	1.81917	3.43611	0.650969	0.257824	0.645244	0.0174567	7.41753	0.525494	8.81605	0.360283	22.2938	465.847	1.27	1.86648	7.41753	0.775722	0.146403	0.505322	8.77e-07	10	2465	l
1115	212	45	7.79191	0.594821	6.71144	8.91809	678.466	1023.72	18.8768	0.484007	0.587532	0.0388329	3.15817	0.806971	9.18054	0.554304	21.8771	454.575	1.26134	1.67986	3.15817	0.621817	0.283146	0.652232	0.0338062	7.21765	0.508165	8.33747	0.418008	21.5118	435.032	1.19184	1.70686	7.21765	0.783646	0.161641	0.509213	8.67e-07	13	765	l
1116	271	50	8.85338	0.53815	7.63204	9.85332	532.412	1032.46	21.0525	0.419936	-0.620052	0.0265317	3.21508	0.836971	10.8604	0.524062	22.5357	486.757	1.30998	1.76498	3.21508	0.647178	0.28274	0.663905	0.0218929	8.79018	0.537456	10.502	0.39086	22.0312	459.955	1.27703	1.82534	8.79018	0.825263	0.135788	0.483212	9.22e-07	10	1853	l
1117	254	50	8.54036	0.661431	7.18226	9.94308	550.413	1036.49	19.498	0.466179	-1.03245	0.0462823	1.77754	0.671065	3.70196	0.6114	28.4104	755.868	1.08204	1.48261	1.77754	0.537096	0.189471	0.516508	0.0406951	3.92925	0.252091	3.62682	0.472514	28.3255	752.71	1.01006	1.54325	3.92925	0.676858	0.0541622	0.286924	8.95e-07	8	1853	l
1118	201	44	7.57128	0.751077	5.89859	9.00367	672.533	1036.85	19.2001	0.604459	0.612515	0.025873	3.46345	0.817775	10.5032	0.495382	24.1421	555.813	1.31086	1.76814	3.46345	0.658499	0.281312	0.662899	0.0223825	9.29878	0.51705	10.6271	0.369242	23.7012	533.057	1.25468	1.77235	9.29878	0.8223	0.149893	0.499628	8.28e-07	12	765	l
1119	174	46	6.98329	0.741492	5.46621	8.55221	624.766	1039.52	16.9684	0.468364	-1.11173	0.056588	2.97724	0.814754	9.03592	0.55627	22.8081	495.178	1.22084	1.64353	2.97724	0.631548	0.277354	0.641047	0.0485694	8.52672	0.483517	9.2546	0.415098	22.6336	485.349	1.16599	1.64269	8.52672	0.811834	0.155438	0.491766	8.28e-07	9	2465	l
1120	200	44	7.52031	0.713406	5.87982	8.67229	816.487	1056.2	19.074	0.585986	1.30734	0.026375	4.07331	0.810616	11.7541	0.483399	24.3887	571.685	1.30745	1.78753	4.07331	0.682911	0.261376	0.6448	0.0240817	11.1358	0.478566	11.6781	0.339341	23.9383	545.867	1.26031	1.7986	11.1358	0.852055	0.177945	0.544273	3.74e-07	5	404	l
1121	229	46	8.11406	0.641469	6.86599	9.35359	347.317	1059.42	19.9178	0.522216	1.32797	0.0315504	3.92317	0.776352	9.77085	0.526049	22.2065	468.996	1.28196	1.73494	3.92317	0.678247	0.26189	0.638088	0.0253964	9.0765	0.420794	8.8353	0.400622	21.4153	430.923	1.2	1.75538	9.0765	0.805405	0.161464	0.515094	7.05e-07	8	575	l
1122	204	44	7.62402	0.443453	6.71128	8.62056	304.884	1066.21	17.8169	0.319362	1.30997	0.0286071	3.67571	0.777988	9.27818	0.51067	21.1981	425.608	1.29406	1.77422	3.67571	0.666471	0.25098	0.63168	0.02422	7.22293	0.40934	7.11428	0.390898	20.0382	372.932	1.17827	1.76707	7.22293	0.789041	0.132779	0.471404	6.66e-07	8	1102	l
1123	193	41	7.44499	0.775846	6.09034	9.15021	135.765	1065.63	18.8741	0.570123	-0.367863	0.021016	4.75144	0.767314	11.21	0.464872	21.2256	431.993	1.32822	1.86924	4.75144	0.721095	0.22758	0.61744	0.0163574	13.0248	0.424487	12.3159	0.321479	21.0994	424.508	1.29358	1.91826	13.0248	0.898069	0.146054	0.510725	6.06e-07	7	250	l
1124	179	41	7.10249	0.473773	6.3602	8.12785	230.554	1069.39	16.9961	0.3465	0.353854	0.01747	4.59502	0.772988	11.1206	0.415821	21.081	425.945	1.33112	1.8793	4.59502	0.700644	0.223933	0.614352	0.0177606	11.0368	0.38308	9.94506	0.297661	20.1691	382.938	1.2431	1.82892	11.0368	0.851883	0.12966	0.473266	6.11e-07	6	7564	l
1125	138	38	6.24039	1.21054	4.03113	8.07775	783.428	1068.97	18.2258	0.787083	0.250371	0.020136	5.78969	0.750007	12.5797	0.404263	24.9732	599.918	1.3218	1.86226	5.78969	0.74709	0.227009	0.615859	0.0203041	14.2424	0.306674	11.2711	0.27224	24.0808	548.672	1.2372	1.78343	14.2424	0.873032	0.157585	0.512773	4.74e-07	7	170	l
1126	207	44	7.71047	0.565924	6.67772	8.93416	317.913	1075.2	18.6461	0.468248	1.24829	0.0316007	4.24433	0.754418	9.64135	0.484995	19.5607	365.492	1.25306	1.76736	4.24433	0.69182	0.212206	0.585376	0.0249591	12.1445	0.395059	11.0378	0.36324	19.474	361.414	1.21453	1.81797	12.1445	0.878751	0.142698	0.493686	6.19e-07	7	1102	l
1127	228	48	8.09886	1.2311	6.10644	10.2509	117.625	1080.59	22.2683	0.721909	1.36225	0.0333599	3.83092	0.812357	11.208	0.495786	21.2174	433.884	1.29547	1.75215	3.83092	0.680256	0.290457	0.669816	0.0351474	10.1323	0.538228	11.9711	0.380055	20.8095	416.391	1.24837	1.7149	10.1323	0.85254	0.179469	0.535615	5.48e-07	5	512	l
1128	168	40	6.91578	1.17534	5.10055	9.125	511.929	1081.27	18.6305	0.747639	-1.34571	0.0435514	2.06	0.73664	4.911	0.567937	27.9033	730.173	1.13414	1.54455	2.06	0.562748	0.222392	0.566171	0.0311578	4.64029	0.428478	5.05959	0.42546	28.0791	739.492	1.09962	1.618	4.64029	0.701893	0.103592	0.402523	6.6e-07	7	1853	l
1129	309	62	9.74416	2.00872	5.31889	13.3767	170.42	1085.32	26.1501	0.703216	-0.220797	0.0235871	2.58519	0.872738	11.1569	0.542857	23.9839	551.418	1.32616	1.78268	2.58519	0.606443	0.3041	0.687277	0.0177246	7.99267	0.633254	11.8968	0.372687	24.1319	556.023	1.31896	1.87557	7.99267	0.810417	0.155624	0.520879	5.08e-07	5	7564	l
1130	233	52	8.17339	1.02723	5.65908	9.93954	99.2515	1089.7	20.6298	0.583393	-1.34814	0.0198266	3.35434	0.821662	10.4044	0.490484	23.2592	515.3	1.32668	1.82439	3.35434	0.650157	0.263432	0.651974	0.0180855	8.43094	0.478185	9.07848	0.339768	22.1326	459.828	1.2533	1.85035	8.43094	0.814298	0.145887	0.502613	5.1e-07	6	1324	l
1131	279	64	9.2262	2.07519	5.46084	13.7741	61.3246	14.5567	24.6406	0.752935	-0.604648	0.0383975	1.286	0.843162	5.09978	0.630176	33.77	1079.25	1.14896	1.49126	1.286	0.476913	0.294664	0.634592	0.0273259	4.21834	0.524631	5.43691	0.431712	33.3013	1049.03	1.12214	1.63836	4.21834	0.673976	0.121582	0.437158	6.99e-07	2	621	c
1132	274	59	8.90039	0.969501	6.95719	11.0804	328.914	16.142	21.0589	0.53303	0.769757	0.063062	1.09447	0.781384	3.50319	0.695634	32.6523	1007.37	1.05392	1.36376	1.09447	0.465222	0.283912	0.60263	0.0504097	3.19737	0.39827	3.65681	0.55642	32.4342	995.465	1.00119	1.49306	3.19737	0.631663	0.119508	0.415755	9.74e-07	3	1290	c
1133	654	83	14.0829	1.25045	11.7883	16.8845	509.106	22.858	31.1995	0.45193	0.350803	0.198951	0.439283	0.603654	1.55417	0.814588	30.9136	913.969	0.711098	0.866949	0.439283	0.325312	0.216157	0.435317	0.138256	0.806957	0.345536	1.6165	0.705043	30.8278	908.155	0.71975	0.986849	0.806957	0.406896	0.0646758	0.252646	8.99e-07	4	876	c
1134	98	32	5.21015	1.15619	3.17491	7.01909	160.245	21.1958	14.7148	0.804096	-0.497816	0.257637	0.38024	0.589488	1.46313	0.827844	38.9012	1468.24	0.602808	0.726461	0.38024	0.303599	0.204698	0.390725	0.237781	0.808824	0.272869	1.55617	0.736765	38.8971	1468.33	0.59676	0.789313	0.808824	0.412392	0.0606203	0.219423	9.95e-07	2	649	c
1135	594	114	13.9265	4.16727	5.94072	21.9376	602.242	30.4821	42.2466	0.87343	-0.60322	0.112217	0.469857	0.799377	2.171	0.790474	37.1997	1322.5	0.89155	1.04939	0.469857	0.329352	0.339564	0.590741	0.0748454	1.10103	0.550514	2.22477	0.647423	36.899	1300.82	0.884745	1.20156	1.10103	0.450967	0.125925	0.386148	1.22e-06	7	846	c
1136	93	33	5.06687	1.30898	2.27131	7.23678	354.318	21.2734	14.6682	0.793245	0.248556	0.156754	0.632588	0.555691	1.71188	0.729712	37.4441	1349.24	0.742269	0.95321	0.632588	0.360115	0.168032	0.400533	0.115817	1.87879	0.142678	2.09573	0.569697	37.3636	1342.49	0.757875	1.03882	1.87879	0.534483	0.0265918	0.166157	9.58e-07	3	1290	c
1137	608	100	14.7263	5.15992	7.21598	23.7855	12.3399	41.3362	48.0853	0.932941	-1.47655	0.0423545	1.44567	0.824506	5.11886	0.644292	31.5685	939.623	1.16134	1.50889	1.44567	0.510282	0.303768	0.646147	0.0292323	3.90649	0.533017	5.18269	0.495908	31.1317	912.64	1.13475	1.65396	3.90649	0.678886	0.121566	0.438992	5.63e-07	2	980	c
1138	275	55	8.96074	1.45569	6.23806	11.6058	211.321	32.8749	23.5495	0.732029	-1.56949	0.0458167	1.36291	0.802667	4.45333	0.63084	31.9432	962.489	1.12048	1.45554	1.36291	0.492925	0.291529	0.625689	0.0377523	3.81385	0.471892	4.61086	0.472259	31.5368	938.154	1.08152	1.54483	3.81385	0.659562	0.12234	0.427013	1.18e-06	5	759	c
1139	506	70	12.4692	1.96116	9.14657	15.739	169.023	39.185	31.6831	0.739583	-0.928424	0.056947	1.14075	0.746064	3.24614	0.673987	33.8102	1081.09	1.04975	1.37278	1.14075	0.46739	0.239315	0.558086	0.0355723	3.1183	0.370381	3.47634	0.506905	33.5558	1065.26	1.02168	1.53951	3.1183	0.633896	0.0549511	0.288638	1.17e-06	5	556	c
1140	443	72	11.583	1.88057	7.26042	15.3222	351.27	39.9519	29.3306	0.692428	0.587728	0.0494082	1.42961	0.817356	4.91365	0.661838	31.142	913.909	1.14726	1.47836	1.42961	0.499007	0.310286	0.647277	0.0372091	3.4097	0.527176	4.60568	0.511219	30.4501	872.16	1.10482	1.59422	3.4097	0.63034	0.143003	0.466597	1.14e-06	5	1290	c
1141	366	66	10.3645	1.81776	6.5494	14.006	555.333	49.7302	26.4982	0.708986	-1.45597	0.11657	0.564122	0.727731	2.03596	0.770423	37.9459	1378.11	0.871245	1.06697	0.564122	0.358376	0.271588	0.533744	0.0727471	1.2871	0.462557	2.19743	0.618767	37.7645	1363.94	0.880438	1.24189	1.2871	0.467554	0.0925077	0.336874	1.29e-06	5	450	c
1142	365	66	10.4509	2.28685	6.73553	14.437	217.926	56.0673	29.2025	0.818715	1.53541	0.0665532	0.875186	0.801042	3.19942	0.7093	34.0416	1097.23	1.03694	1.30218	0.875186	0.42521	0.296857	0.604052	0.0421413	2.47484	0.494512	3.44797	0.52404	33.8396	1084.27	1.02259	1.48658	2.47484	0.577407	0.0998139	0.380252	1.4e-06	6	759	c
1143	526	93	13.6971	5.06912	4.93681	23.3205	31.6618	78.0814	46.0416	0.935188	-1.44184	0.0727472	0.886317	0.797233	3.18556	0.721765	24.841	575.935	1.00663	1.26625	0.886317	0.427816	0.297306	0.597811	0.0505144	2.234	0.509192	3.27584	0.568721	24.5563	562.191	0.991037	1.40882	2.234	0.571346	0.112196	0.392668	7.63e-07	5	1903	c
1144	424	78	11.6978	3.35945	6.88481	17.4412	174.796	73.3107	36.2957	0.894371	-1.45299	0.0360583	1.80958	0.828704	6.28203	0.639431	31.6064	942.871	1.21638	1.57378	1.80958	0.505495	0.323934	0.675086	0.0280302	3.47324	0.657756	6.07421	0.483546	31.0676	909.626	1.18781	1.68884	3.47324	0.654568	0.173792	0.524305	1.43e-06	4	463	c
1145	320	63	9.93911	2.55969	6.10193	14.3127	196.211	71.2583	29.6482	0.86405	-1.43776	0.0444512	2.16809	0.763463	5.58299	0.578982	29.8797	841.839	1.14513	1.55317	2.16809	0.57584	0.230332	0.576681	0.0307476	5.4963	0.404147	5.61213	0.413373	29.3037	808.023	1.1067	1.65149	5.4963	0.735151	0.0765398	0.350947	1.48e-06	7	367	c
1146	540	83	12.9352	2.77969	6.70738	17.9313	488.326	88.5361	35.2188	0.813656	0.661946	0.152739	0.393819	0.73679	1.74811	0.813858	31.2921	933.278	0.785083	0.912762	0.393819	0.303765	0.313266	0.536235	0.11034	0.855204	0.429549	1.74959	0.675566	31.0407	918.482	0.769628	1.03621	0.855204	0.400318	0.0916038	0.307716	1.28e-06	5	2157	c
1147	169	42	6.9711	1.08489	5.13977	9.11504	408.291	90.5421	17.8043	0.687305	1.56031	0.0465073	1.2995	0.742015	3.51855	0.61381	34.8968	1153.16	1.06805	1.42213	1.2995	0.473734	0.228708	0.554404	0.0347796	3.61364	0.358136	3.81495	0.433939	34.3864	1120.12	1.03253	1.55545	3.61364	0.632987	0.0942152	0.377557	1.27e-06	3	2589	c
1148	113	45	5.76117	1.86402	1.65358	9.25688	385.307	104.006	18.5055	0.877342	1.41882	0.183499	0.538874	0.444218	1.48479	0.753083	38.2869	1415.48	0.682614	0.862101	0.538874	0.33522	0.108487	0.306853	0.132431	1.1519	0.00187435	1.57703	0.621519	38.2152	1413.24	0.637452	0.974732	1.1519	0.442364	0.0115826	0.106261	1.4e-06	3	2589	c
1149	108	38	5.49477	1.23963	3.6248	8.11641	376.456	102.61	15.134	0.752021	1.38575	0.290145	0.42033	0.425118	1.36558	0.812912	38.0687	1405.54	0.592101	0.737744	0.42033	0.317083	0.120804	0.30082	0.289708	0.895522	-0.00449775	1.44576	0.731343	37.9104	1395.7	0.563313	0.773735	0.895522	0.4341	0.016134	0.111831	1.43e-06	4	2589	c
1150	625	81	13.7371	1.25634	11.8326	16.949	656.878	109.655	32.6933	0.597532	0.299386	0.0535722	0.993644	0.874354	4.95414	0.678602	31.6233	943.532	1.14858	1.42489	0.993644	0.441984	0.363695	0.684997	0.0327008	2.85455	0.624467	4.80066	0.501864	31.0909	910.007	1.12995	1.61452	2.85455	0.61594	0.142102	0.467803	1.55e-06	4	677	c
1151	576	92	14.3763	4.8232	6.6556	22.3245	464.844	116.784	44.2951	0.910305	0.943222	0.0989546	0.644829	0.815033	2.74309	0.755507	37.5873	1347.98	0.95875	1.17619	0.644829	0.378579	0.32422	0.604675	0.0636744	1.48479	0.619596	2.95159	0.616055	37.3834	1331.66	0.978156	1.34112	1.48479	0.496743	0.151092	0.443658	1.33e-06	3	742	c
1152	196	47	7.57556	1.69511	4.88737	10.9987	400.171	105.141	21.6348	0.823155	-0.223729	0.0403764	1.26961	0.864926	5.6997	0.628816	34.6476	1137.89	1.1758	1.5276	1.26961	0.475576	0.324249	0.66807	0.0260861	3.45775	0.639496	5.79571	0.453461	33.8803	1085.08	1.17923	1.67308	3.45775	0.645288	0.177817	0.527807	1.35e-06	3	2589	c
1153	687	109	15.118	5.83824	4.4252	24.9825	179.934	137.598	50.6386	0.906409	-1.2155	0.0406695	1.13354	0.884527	5.90827	0.673112	33.6201	1070.99	1.17796	1.49003	1.13354	0.458348	0.353687	0.687623	0.0279412	3.66497	0.643372	6.13836	0.508131	33.0663	1033.83	1.17677	1.66398	3.66497	0.656904	0.16424	0.507452	1.66e-06	4	762	c
1154	294	64	9.60048	2.92497	3.71993	14.4253	201.537	133.236	30.2712	0.899324	1.49597	0.0497335	1.26898	0.7761	3.8338	0.647828	33.4246	1056.34	1.07835	1.42158	1.26898	0.482094	0.25457	0.582618	0.0346544	3.14463	0.494867	4.11268	0.494071	32.938	1026.04	1.05179	1.53863	3.14463	0.639413	0.121117	0.424183	1.77e-06	6	366	c
1155	662	90	14.4601	3.37722	7.97775	19.8399	20.625	141.958	41.2599	0.838778	-1.16703	0.0460554	1.20129	0.882528	6.11307	0.672096	30.9217	903.195	1.19045	1.49887	1.20129	0.476875	0.364767	0.698301	0.0312379	3.13865	0.680582	5.91307	0.51647	30.3692	868.684	1.17719	1.65216	3.13865	0.632519	0.175723	0.522118	6.2e-07	1	753	c
1156	608	92	13.3933	1.82921	8.77379	18.3018	342.218	139.721	32.0421	0.599041	-0.133987	0.0569464	0.91597	0.81598	3.48878	0.689309	34.0009	1093.2	1.07425	1.36286	0.91597	0.428384	0.304215	0.621891	0.0388753	2.63006	0.493391	3.59575	0.520114	33.7322	1076.16	1.04563	1.52954	2.63006	0.603744	0.105773	0.396264	1.68e-06	3	1357	c
1157	600	80	13.3827	1.1303	11.1097	15.817	681.334	153.846	30.906	0.477182	-0.763363	0.0464681	1.10973	0.907595	7.00473	0.679729	31.1283	917.175	1.22405	1.53363	1.10973	0.464723	0.392798	0.726265	0.0324789	3.17143	0.725975	6.78675	0.519283	30.6076	884.12	1.21129	1.70267	3.17143	0.639873	0.19867	0.55956	1.43e-06	4	697	c
1158	678	102	13.4948	4.03348	2.19295	18.6995	146.644	158.451	37.1778	0.725769	0.531838	0.0973539	0.636005	0.75818	2.31504	0.755902	36.4891	1269.73	0.920759	1.1345	0.636005	0.37689	0.286505	0.561891	0.0617149	1.65936	0.451707	2.5132	0.596817	36.3642	1260.94	0.916457	1.30574	1.65936	0.517991	0.0905521	0.341296	1.45e-06	5	2171	c
1159	561	78	13.0393	2.01542	10.0901	16.5967	335.58	162.141	33.5875	0.741833	-0.196332	0.0681373	0.98293	0.851164	4.30207	0.69339	30.6377	884.333	1.10628	1.37119	0.98293	0.445356	0.356006	0.669186	0.0451556	2.77016	0.578809	4.28849	0.533145	30.3468	867.016	1.0785	1.53194	2.77016	0.618342	0.136964	0.449088	1.73e-06	3	1357	c
1160	318	60	9.75371	2.16446	6.16417	14.0082	407.528	167.979	27.4033	0.809068	-1.47085	0.0406088	1.46569	0.791374	4.51273	0.613374	33.7539	1077.26	1.12447	1.49225	1.46569	0.501081	0.254757	0.594272	0.0314632	4.21132	0.408499	4.55986	0.451134	33.2981	1048.04	1.07997	1.6	4.21132	0.682787	0.0770558	0.346913	1.42e-06	2	349	c
1161	487	72	12.0946	2.01657	8.97232	15.2508	451.328	170.987	32.0163	0.755306	-1.33922	0.0413597	1.25946	0.878134	6.16742	0.658198	31.6972	949.133	1.20585	1.54268	1.25946	0.485503	0.348068	0.691379	0.0315269	3.43541	0.64147	5.79097	0.516741	31.134	913.703	1.16774	1.67357	3.43541	0.646191	0.169212	0.515835	1.42e-06	2	537	c
1162	636	90	13.9487	3.42257	7.12499	19.4419	134.595	181.928	40.1663	0.844454	1.16258	0.0540808	0.895597	0.849766	3.98067	0.715102	33.6428	1069.85	1.10324	1.37015	0.895597	0.429821	0.343901	0.658736	0.035203	2.26449	0.627828	4.04227	0.559408	33.337	1049.83	1.08902	1.53741	2.26449	0.570766	0.15281	0.473912	1.37e-06	3	2171	c
1163	612	95	14.1346	3.99726	8.49732	22.1068	621.047	190.391	42.1077	0.86848	-0.286895	0.0439571	1.0919	0.900732	6.49977	0.673845	32.3847	993.939	1.19123	1.49293	1.0919	0.458641	0.373979	0.704831	0.0297936	2.98447	0.716594	6.26535	0.50163	31.8272	957.984	1.16927	1.65006	2.98447	0.629121	0.186299	0.536194	1.74e-06	3	650	c
1164	363	71	10.9423	3.46285	4.61086	16.7283	675.106	191.288	34.6042	0.902448	-0.316216	0.0969395	0.524565	0.810228	2.38209	0.775813	28.2721	753.093	0.920887	1.09694	0.524565	0.345263	0.345663	0.606385	0.0651551	1.26621	0.562698	2.44775	0.624915	28.0648	741.828	0.911512	1.25157	1.26621	0.472596	0.13515	0.407316	1.45e-06	6	888	c
1165	603	86	13.5424	1.98994	9.90434	18.0729	330.258	199.672	33.0225	0.666823	-0.0420736	0.0576881	0.900618	0.876513	4.64662	0.726536	30.8264	894.225	1.15253	1.4168	0.900618	0.43466	0.393428	0.707377	0.0377903	2.46082	0.659923	4.61803	0.584047	30.6362	882.169	1.13776	1.58309	2.46082	0.587624	0.196852	0.540597	1.73e-06	6	1700	c
1166	693	95	14.7727	3.01521	9.77759	20.6288	359.122	216.256	39.6688	0.788335	-0.664305	0.0499076	1.45374	0.800261	4.6391	0.66332	30.5179	876.573	1.13298	1.48109	1.45374	0.503882	0.283373	0.621892	0.0326287	3.61944	0.517235	4.74865	0.504517	30.2158	858.676	1.10737	1.63276	3.61944	0.652886	0.107534	0.411527	1.54e-06	3	1369	c
1167	542	82	13.0604	2.41423	9.30644	17.8031	703.454	213.888	33.6365	0.7451	-0.756596	0.0502123	0.922657	0.853241	4.14345	0.680863	33.6296	1068.94	1.11368	1.39762	0.922657	0.424463	0.330538	0.651941	0.032518	2.56466	0.596855	4.18081	0.505014	33.2802	1046.25	1.09178	1.5849	2.56466	0.593132	0.120408	0.428685	1.22e-06	7	951	c
1168	496	87	12.9432	4.66352	4.42709	20.6918	736.319	219.225	42.0507	0.921463	-0.46082	0.0741296	0.657377	0.817496	2.801	0.733607	35.7678	1215.92	0.991724	1.20928	0.657377	0.373557	0.329023	0.61553	0.056157	1.50732	0.557849	2.70453	0.594634	35.4488	1194.92	0.958015	1.33606	1.50732	0.501736	0.130982	0.41325	9.19e-07	4	659	c
1169	345	74	9.65042	2.02472	4.0653	12.6752	117.812	233.147	24.8849	0.635313	-0.456091	0.167988	0.397764	0.709156	1.68381	0.815495	38.0527	1393.87	0.749523	0.881241	0.397764	0.307076	0.282748	0.501879	0.109115	0.937037	0.362218	1.73461	0.664815	37.7519	1371.13	0.750158	1.03517	0.937037	0.417175	0.0600294	0.249108	1.37e-06	2	585	c
1170	287	58	9.43017	2.00614	6.19753	13.3208	419.668	232.765	26.4042	0.810543	-0.797583	0.029845	1.65646	0.867263	7.23965	0.597814	34.0163	1098.1	1.23211	1.60371	1.65646	0.522201	0.318265	0.674548	0.0247714	5.14043	0.58574	7.20435	0.424018	33.4468	1060.15	1.1904	1.70602	5.14043	0.721431	0.158212	0.504035	1.37e-06	2	276	c
1171	381	64	10.5387	0.916872	8.55413	12.3219	689.859	246.01	24.2478	0.388678	-0.580677	0.0358427	1.43241	0.883773	7.16213	0.612056	30.276	866.743	1.23248	1.57316	1.43241	0.498877	0.351402	0.699014	0.0254677	4.16667	0.648071	6.91975	0.449078	29.7778	836.254	1.19908	1.72751	4.16667	0.683275	0.161702	0.511933	1.27e-06	4	473	c
1172	450	85	11.9028	4.16259	3.17821	19.1008	622.75	250.599	38.0694	0.898678	-0.40489	0.112631	0.45697	0.810695	2.20697	0.793333	28.2764	754.121	0.894802	1.04741	0.45697	0.324503	0.358182	0.605662	0.0805188	1.10992	0.553869	2.24394	0.644504	27.9893	738.785	0.879877	1.18081	1.10992	0.443279	0.14633	0.41241	1.7e-06	3	1233	c
1173	601	99	14.5845	5.34851	5.1971	24.7137	326.9	259.728	47.7426	0.926916	0.0965734	0.102595	0.705935	0.713507	2.23203	0.7532	25.7968	623.998	0.901469	1.12252	0.705935	0.390135	0.264852	0.538641	0.0733968	1.43462	0.44254	2.28674	0.632376	25.6731	618.256	0.883085	1.24031	1.43462	0.501353	0.0929857	0.337529	1.59e-06	3	984	c
1174	686	91	14.339	1.35448	10.6553	16.4947	56.9737	270.22	31.2112	0.340445	-0.0259039	0.0673941	1.14385	0.881808	5.83897	0.704482	33.4036	1058.82	1.14515	1.42773	1.14385	0.46064	0.374992	0.694692	0.0470384	2.72295	0.734158	6.12136	0.560717	33.2213	1046.72	1.14397	1.56023	2.72295	0.611155	0.207934	0.55115	1.15e-06	5	1093	c
1175	323	92	9.82779	4.27786	1.84017	18.2374	83.221	275.942	36.5055	0.928263	1.55284	0.0658878	0.975352	0.811819	3.59152	0.691901	35.4894	1197.48	1.02073	1.27953	0.975352	0.443035	0.303598	0.606171	0.0456722	2.38197	0.522358	3.49347	0.523075	34.8026	1150.1	1.00154	1.40672	2.38197	0.58291	0.115137	0.397369	1.38e-06	6	1305	c
1176	746	95	15.1731	2.89014	10.0705	20.7091	103.548	280.988	39.3826	0.76833	0.886437	0.0659128	0.811012	0.901329	5.10968	0.753947	34.5837	1136.54	1.10361	1.33996	0.811012	0.407644	0.405225	0.702757	0.043358	1.75457	0.788211	5.14227	0.616272	34.3918	1122.66	1.10744	1.48235	1.75457	0.52901	0.241362	0.57817	1.53e-06	7	1305	c
1177	485	73	12.0958	1.67758	8.46593	15.2064	288.192	288.851	29.9976	0.649184	-0.805124	0.0375104	1.62673	0.838882	6.04825	0.635667	29.4368	815.298	1.21034	1.58023	1.62673	0.520523	0.304019	0.657658	0.026164	3.97163	0.604814	6.02501	0.480572	29.0402	792.21	1.18195	1.70507	3.97163	0.66996	0.138406	0.473233	1.71e-06	8	803	c
1178	439	72	11.4778	1.68156	8.02438	15.0463	426.734	288.235	29.4132	0.713393	0.676499	0.0465305	0.856005	0.895681	5.10282	0.695527	35.2053	1174.31	1.16481	1.4241	0.856005	0.414966	0.397571	0.711835	0.0332787	2.24339	0.715014	4.93596	0.517336	34.8307	1147.99	1.14851	1.58735	2.24339	0.560257	0.197218	0.54167	1.31e-06	4	411	c
1179	285	64	9.346	2.29401	5.08053	13.5115	65.0767	293.339	26.0128	0.760713	-1.52627	0.0281489	2.96689	0.844584	10.545	0.558578	27.8783	741.258	1.30679	1.75799	2.96689	0.62825	0.297091	0.677122	0.0267951	8	0.533158	9.56822	0.424886	26.9156	685.49	1.24034	1.76789	8	0.803963	0.153621	0.504835	1.33e-06	9	1093	c
1180	162	47	7.8219	3.11719	2.45272	12.3217	312.549	292.074	27.6902	0.956768	0.675532	0.0631393	1.10357	0.644237	2.55099	0.6475	35.3321	1186.69	0.957822	1.28522	1.10357	0.450834	0.167163	0.457146	0.0487618	2.67521	0.187257	2.64579	0.488336	35.1538	1177	0.903461	1.38436	2.67521	0.591272	0.04384	0.245285	1.55e-06	4	803	c
1181	430	70	11.4359	2.4085	5.44631	15.5464	682.815	300.827	31.2441	0.782434	-0.394261	0.0617858	1.33458	0.822625	4.76203	0.657793	31.0256	909.236	1.10036	1.39373	1.33458	0.498459	0.328415	0.649379	0.0488607	3.37057	0.514197	4.46908	0.530352	30.6294	885.768	1.0446	1.46825	3.37057	0.649187	0.150456	0.460965	1.22e-06	3	505	c
1182	289	63	9.7149	3.04532	5.30624	14.6952	738.249	321.809	31.6187	0.914718	-1.30538	0.0263016	2.08787	0.835127	7.33175	0.588982	30.4814	877.646	1.25113	1.67574	2.08787	0.565852	0.283852	0.65234	0.0184656	5.62656	0.557055	7.3513	0.424855	30.0747	852.438	1.21885	1.79891	5.62656	0.725912	0.138607	0.48479	7.97e-07	2	341	c
1183	411	74	11.1783	2.5835	6.61638	15.3647	426.811	316.806	30.8762	0.786954	-0.271632	0.0503981	0.951879	0.855771	4.2999	0.695715	37.0587	1304.46	1.1113	1.40054	0.951879	0.438736	0.333391	0.654966	0.0322409	2.48094	0.647365	4.51771	0.532164	36.6804	1276.37	1.11661	1.59441	2.48094	0.594304	0.160143	0.492309	1.28e-06	4	421	c
1184	733	99	14.9829	2.37493	9.77851	20.0369	161.004	325.129	37.8863	0.678959	-0.522891	0.0424112	1.0698	0.896206	6.15347	0.683298	31.4467	933.251	1.21906	1.52336	1.0698	0.460248	0.387825	0.72076	0.0268741	3.31459	0.68723	6.29876	0.518657	31.1079	911.782	1.20971	1.72057	3.31459	0.646931	0.18775	0.547613	1.87e-06	4	846	c
1185	366	77	11.0896	4.25652	4.61302	17.8346	303.381	316.69	38.928	0.94194	0.0694739	0.0557612	1.00225	0.781525	3.29374	0.665416	34.6062	1134.3	1.04828	1.34723	1.00225	0.437429	0.273805	0.589737	0.0396188	2.70764	0.4485	3.4548	0.515048	34.3754	1119.79	1.01857	1.51305	2.70764	0.610071	0.0882027	0.360977	1.51e-06	5	1763	c
1186	591	90	13.5368	3.11959	6.41189	18.1439	272.803	330.022	38.7105	0.81375	0.475636	0.0352485	1.50567	0.888745	7.76672	0.620977	29.4077	819.081	1.23823	1.60004	1.50567	0.509233	0.33649	0.690321	0.022378	4.54808	0.669218	7.87473	0.453768	29.0327	796.216	1.22504	1.77283	4.54808	0.705299	0.148298	0.497196	1.64e-06	7	1763	c
1187	201	45	7.5802	1.23624	4.93413	10.1078	674.146	342.926	18.3561	0.553618	-1.00402	0.110451	0.645341	0.695057	2.05813	0.754103	26.7316	672.505	0.868135	1.08029	0.645341	0.375575	0.256097	0.521419	0.0841322	1.21818	0.435244	2.0785	0.616364	26.5515	664.283	0.837948	1.17487	1.21818	0.45457	0.109808	0.357208	1.2e-06	4	1038	c
1188	706	98	15.0045	3.44526	9.0484	20.7393	607.866	354.047	41.324	0.819891	-1.39096	0.0724734	0.893032	0.838505	3.76489	0.728463	32.0328	967.82	1.0868	1.33961	0.893032	0.428966	0.3583	0.665394	0.049986	2.28732	0.565747	3.63362	0.582267	31.7769	951.792	1.0597	1.47912	2.28732	0.578134	0.155308	0.469539	1.47e-06	4	2808	c
1189	374	72	10.9394	3.50746	4.76099	16.5404	581.812	367.106	35.5194	0.908366	1.32967	0.0509805	1.17068	0.843615	4.74294	0.655155	32.7082	1011.58	1.12063	1.44221	1.17068	0.467955	0.312385	0.643192	0.0418232	3.51402	0.558356	4.97834	0.50184	32.486	997.887	1.0935	1.56685	3.51402	0.660377	0.132617	0.44668	1.5e-06	3	464	c
1190	517	92	13.4651	4.45211	6.58236	20.9435	426.755	379.787	43.0845	0.924726	1.4932	0.0376787	1.53814	0.782679	4.53887	0.61072	35.0805	1164.42	1.14223	1.52678	1.53814	0.511083	0.246389	0.590647	0.0268701	3.86897	0.466213	4.62407	0.434278	34.6506	1136.03	1.10348	1.6784	3.86897	0.662545	0.0866096	0.375453	1.35e-06	3	774	c
1191	520	94	13.3865	5.04685	4.55231	21.8408	400.372	406.231	45.5934	0.938581	1.44032	0.0518682	1.16632	0.806142	4.00818	0.674719	35.4543	1192	1.08666	1.40179	1.16632	0.468539	0.279624	0.604968	0.038183	2.84327	0.563151	4.25429	0.519279	35.298	1181.55	1.0727	1.54046	2.84327	0.620716	0.109505	0.404279	1.39e-06	1	547	c
1192	355	67	10.7118	2.84771	5.79752	15.8862	725.584	400.445	31.4559	0.861535	-0.955733	0.0683971	0.943164	0.821214	3.63769	0.699738	33.6928	1075.69	1.04193	1.31407	0.943164	0.439367	0.320464	0.627978	0.0507623	2.11661	0.556455	3.38601	0.57722	33.0848	1036.23	1.0099	1.43195	2.11661	0.569774	0.124635	0.416311	8.86e-07	2	431	c
1193	654	102	13.4695	3.22751	4.00002	17.316	218.901	406.94	33.2457	0.514429	0.237193	0.0885361	0.697973	0.773401	2.5401	0.744849	24.7129	569.794	0.957202	1.18435	0.697973	0.390967	0.294772	0.579649	0.0666985	1.65591	0.466721	2.55258	0.600633	24.4839	559.554	0.925451	1.30865	1.65591	0.522907	0.106416	0.36984	1.67e-06	3	1426	c
1194	458	80	12.0134	2.97748	5.24412	16.8997	356.088	403.975	34.6551	0.840423	-0.226999	0.0362668	1.80955	0.725852	4.30032	0.585584	32.8125	1015.38	1.12684	1.54336	1.80955	0.539956	0.202655	0.542149	0.0257518	4.64151	0.349475	4.56751	0.41994	32.3019	983.616	1.09311	1.68353	4.64151	0.699037	0.0630837	0.322278	1.28e-06	4	551	c
1195	241	51	8.38377	1.31267	5.71625	10.6812	660.809	411.514	20.842	0.627144	-1.43017	0.0342379	2.14302	0.738358	5.09532	0.577377	30.2963	862.26	1.17553	1.60869	2.14302	0.571323	0.218746	0.571308	0.0248348	4.4712	0.420072	4.85497	0.427916	29.6545	826.233	1.10127	1.69721	4.4712	0.692742	0.0978585	0.400291	1.15e-06	1	291	c
1196	412	71	11.1356	1.77166	7.70948	14.5486	605.954	426.989	26.0337	0.519445	1.00774	0.175602	0.392363	0.753198	1.79489	0.821988	27.8499	736.427	0.764119	0.893967	0.392363	0.306924	0.338403	0.55245	0.126673	0.746479	0.552438	1.83394	0.711268	27.8338	734.343	0.782848	1.01204	0.746479	0.390459	0.159983	0.40171	1.29e-06	3	931	c
1197	439	71	12.2085	3.52719	6.51582	17.8918	476.453	438.748	37.1027	0.898296	-0.677239	0.0475378	0.827183	0.879177	4.42312	0.693419	33.7399	1076.29	1.12965	1.38881	0.827183	0.405425	0.372027	0.685514	0.030456	2.32615	0.646771	4.29269	0.522832	33.4043	1054.12	1.1045	1.57619	2.32615	0.571741	0.152244	0.478273	1.61e-06	2	492	c
1198	610	84	13.629	2.6194	8.69229	17.8114	371.8	474.044	36.6259	0.788695	0.125044	0.0564652	1.50566	0.753879	4.05877	0.657129	30.9225	900.472	1.09399	1.44318	1.50566	0.510561	0.250106	0.581405	0.0366144	3.84448	0.422389	4.32792	0.503126	30.8318	894.696	1.07903	1.615	3.84448	0.67043	0.0794093	0.353574	1.72e-06	5	679	c
1199	716	102	15.0021	3.6438	6.86513	21.4438	445.801	495.865	43.0781	0.819882	-0.800182	0.0339356	1.13504	0.900311	6.69295	0.655401	30.3106	865.637	1.25896	1.57465	1.13504	0.454635	0.383428	0.725396	0.0223505	3.0065	0.726423	6.49481	0.483984	29.7837	834.229	1.23105	1.74563	3.0065	0.614023	0.195506	0.5612	1.9e-06	8	1634	c
1200	531	79	12.7316	2.49573	8.52584	17.2486	182.431	490.448	34.0558	0.775858	-0.296134	0.0576099	0.922999	0.841219	3.90652	0.696516	33.7101	1074.78	1.08986	1.36965	0.922999	0.43201	0.324774	0.641889	0.0361527	2.4197	0.59633	3.99713	0.524519	33.5161	1062.17	1.07218	1.54707	2.4197	0.588175	0.129503	0.439125	1.63e-06	5	1250	c
1201	378	68	10.5868	1.70565	7.19647	13.6056	480.193	490.725	26.2534	0.679367	-1.04	0.0580709	1.1176	0.768366	3.41244	0.675983	34.8074	1147.75	1.05506	1.36847	1.1176	0.465215	0.266989	0.586548	0.0411934	2.8949	0.469604	3.729	0.537843	34.7102	1141.45	1.04373	1.51859	2.8949	0.630602	0.104252	0.392199	1.8e-06	5	1159	c
1202	688	86	14.6341	2.23732	10.8986	18.7155	538.961	495.933	37.4785	0.747511	0.72867	0.0614711	0.835637	0.867223	4.14677	0.710238	31.7465	949.796	1.11904	1.3676	0.835637	0.417608	0.374812	0.683989	0.0410071	2.17264	0.646041	4.06905	0.554891	31.4202	929.675	1.09576	1.53377	2.17264	0.567753	0.166523	0.493114	1.63e-06	5	797	c
1203	181	61	7.317	2.50726	1.70192	11.6138	335.937	496.974	20.657	0.769395	-0.182444	0.110226	0.63961	0.701894	2.07279	0.744481	37.3961	1339.36	0.848783	1.06137	0.63961	0.373799	0.243892	0.505298	0.0807407	1.62963	0.293664	2.15358	0.585185	37.4222	1343.05	0.815341	1.18597	1.62963	0.509865	0.0650596	0.276868	1.73e-06	5	1190	c
1204	179	57	7.2875	1.53139	4.64568	10.8176	426.162	512.476	19.6257	0.751241	-0.796224	0.0415308	1.36215	0.801971	4.43928	0.608416	34.5432	1130.77	1.10106	1.44398	1.36215	0.481772	0.262194	0.59431	0.0283508	3.96094	0.444647	4.56615	0.428496	33.8203	1082.34	1.07829	1.59428	3.96094	0.668208	0.084611	0.362467	1.99e-06	8	1634	c
1205	486	71	12.0163	1.04126	8.80722	14.2113	189.265	516.139	28.0672	0.496029	-0.884923	0.0719309	1.92527	0.823505	6.45419	0.644259	28.5165	769.452	1.13839	1.47076	1.92527	0.553352	0.296704	0.633199	0.0525343	4.63158	0.52519	5.8773	0.499439	27.9474	736.263	1.08875	1.55393	4.63158	0.693872	0.120841	0.425617	1.64e-06	5	1250	c
1206	396	65	10.8382	1.26296	7.75978	13.0696	500.269	517.338	25.6096	0.505118	0.584665	0.0458196	1.7551	0.831682	6.21366	0.626651	30.2993	867.121	1.17851	1.54258	1.7551	0.541835	0.296543	0.644627	0.0331091	4.77035	0.530472	6.07994	0.487113	30.0029	848.338	1.14483	1.6721	4.77035	0.713852	0.109985	0.420525	1.84e-06	6	1159	c
1207	647	95	14.8156	5.21503	6.11949	23.672	720.508	534.868	48.8171	0.92864	-0.420111	0.040954	1.30095	0.841064	5.09268	0.668469	31.8408	955.57	1.17327	1.5145	1.30095	0.481932	0.314479	0.657054	0.0271035	2.95567	0.618929	4.87811	0.517862	31.594	940.095	1.13846	1.66095	2.95567	0.621366	0.13541	0.462978	1.12e-06	5	941	c
1208	264	58	8.87315	2.33922	4.4743	12.6158	528.419	538.065	27.1362	0.857223	-1.55819	0.0272796	2.41379	0.814402	7.50275	0.562306	29.1599	802.092	1.25835	1.67996	2.41379	0.597156	0.297192	0.666092	0.021816	5.90566	0.468163	6.55213	0.440081	28.2358	748.058	1.18488	1.76638	5.90566	0.734819	0.138639	0.480996	1.83e-06	7	304	c
1209	238	59	8.63214	2.14602	5.18467	13.1032	145.684	544.898	23.9102	0.803043	1.23277	0.08788	0.773852	0.682667	2.2193	0.703534	37.8575	1370.53	0.892236	1.13689	0.773852	0.394485	0.212658	0.486855	0.0649398	1.57627	0.426463	2.37417	0.557627	37.6893	1359.44	0.87193	1.25135	1.57627	0.48588	0.0963018	0.344843	1.67e-06	6	1717	c
1210	329	61	9.88139	2.21128	6.23393	13.9152	368.105	547.196	28.3608	0.824435	-1.52775	0.0423057	1.65674	0.807357	5.30003	0.611359	31.6915	947.457	1.16423	1.5268	1.65674	0.529076	0.284513	0.630367	0.0279564	5.13074	0.456357	5.71885	0.451838	31.3216	924.269	1.14667	1.69167	5.13074	0.727952	0.0925821	0.38916	2.1e-06	4	357	c
1211	599	86	13.5773	2.56699	9.68448	18.282	548.972	553.587	35.9494	0.784738	-1.44101	0.0994269	0.643111	0.806586	2.66252	0.764844	34.3498	1119.92	0.974517	1.18191	0.643111	0.38197	0.3488	0.62695	0.0658451	1.61495	0.513135	2.65852	0.629115	34.2692	1114.78	0.956097	1.34429	1.61495	0.525868	0.123979	0.403469	1.84e-06	6	699	c
1212	127	43	6.07584	1.74351	2.34227	9.22951	296.169	544.316	16.9094	0.759285	-1.06311	0.143397	0.5	0.631447	1.67833	0.766822	33.0794	1045.79	0.775048	0.940099	0.5	0.326712	0.213546	0.448648	0.0973307	1.125	0.298322	1.80165	0.625	32.9583	1038.56	0.764003	1.0748	1.125	0.43851	0.0536767	0.239917	1.82e-06	9	2395	c
1213	621	88	13.5928	2.45257	6.8783	17.6569	600.674	556.819	33.4055	0.585652	1.23465	0.0427778	1.24936	0.861179	5.49988	0.672823	30.9635	902.895	1.19533	1.53082	1.24936	0.483359	0.342244	0.684481	0.0281527	3.52708	0.633346	5.80981	0.510187	30.7617	890.402	1.18657	1.7083	3.52708	0.658229	0.153185	0.496765	1.72e-06	4	709	c
1214	358	62	10.5511	2.50272	6.62165	14.8631	61.1324	556.828	30.6968	0.851664	-1.10841	0.038408	2.90386	0.746978	6.73835	0.557393	29.5246	822.394	1.19892	1.64965	2.90386	0.629489	0.221385	0.580337	0.0277755	8.05461	0.239931	6.29861	0.410011	28.6962	772.872	1.133	1.75941	8.05461	0.801317	0.0631227	0.329161	1.26e-06	6	383	c
1215	535	80	13.1894	2.91667	8.79891	18.6915	269.073	560.195	36.1318	0.832686	-0.816763	0.0488839	1.58271	0.837995	5.88476	0.663242	31.6257	943.404	1.20451	1.56703	1.58271	0.515332	0.324151	0.674228	0.0363641	3.72949	0.611515	5.80004	0.523286	31.0909	910.192	1.17902	1.69568	3.72949	0.649609	0.17662	0.529148	1.77e-06	3	604	c
1216	275	70	9.77795	3.4	3.7516	16.6387	304.356	554.688	31.9473	0.921137	-0.19753	0.194119	0.417617	0.656053	1.60709	0.806114	33.4041	1069.63	0.729743	0.869248	0.417617	0.312249	0.251259	0.470142	0.15543	0.748792	0.462315	1.69631	0.71256	33.3575	1066.29	0.734587	0.965659	0.748792	0.385968	0.114053	0.332015	1.9e-06	9	2395	c
1217	445	80	11.2346	2.30711	4.16672	14.4261	26.6968	566.144	28.4849	0.622986	-0.391109	0.0316668	1.80915	0.821814	6.07656	0.579989	31.1348	913.333	1.22094	1.62224	1.80915	0.53893	0.272732	0.633152	0.0214225	5.31283	0.457417	5.89587	0.40336	30.6658	884.026	1.17416	1.76635	5.31283	0.728516	0.0756622	0.360119	9.67e-07	5	1380	c
1218	530	76	12.6335	1.92847	9.55819	16.3455	92.4058	571.42	32.7397	0.731127	1.43361	0.0310999	1.87116	0.832444	6.58369	0.584101	30.622	884.101	1.23434	1.64149	1.87116	0.54005	0.281339	0.64478	0.0206752	5.23441	0.532447	6.59766	0.406015	30.2796	862.625	1.20263	1.80426	5.23441	0.724875	0.100396	0.41669	1.53e-06	7	927	c
1219	149	46	6.78391	2.08602	3.0283	10.3607	135.739	572.539	21.1644	0.888751	-1.35436	0.0694088	1.14922	0.607194	2.46284	0.641667	37.1298	1316.33	0.913383	1.23742	1.14922	0.458589	0.155128	0.433444	0.0637603	3.24545	0.086096	2.7756	0.484866	36.7182	1288.71	0.873349	1.3035	3.24545	0.625077	0.0561975	0.269445	1.7e-06	8	1717	c
1220	163	47	7.08027	2.43543	2.44125	11.0281	146.376	576.797	23.2708	0.908576	-1.44502	0.0486949	2.28822	0.658468	4.34994	0.554575	34.1652	1106.67	1.06605	1.46972	2.28822	0.583721	0.170668	0.489742	0.0511153	5.28696	0.3001	4.77694	0.425536	33.3913	1057.08	1.02991	1.49566	5.28696	0.726462	0.0810255	0.34446	1.72e-06	7	1717	c
1221	410	78	11.3581	2.95291	5.43426	17.0284	69.6703	584.218	32.6136	0.855155	-1.28799	0.13006	0.757636	0.710101	2.30672	0.73672	37.4655	1342.17	0.890864	1.13055	0.757636	0.405115	0.244587	0.51985	0.107784	1.71965	0.354554	2.33214	0.611536	37.3497	1335.48	0.854923	1.21513	1.71965	0.529374	0.0661938	0.282526	1.39e-06	6	486	c
1222	183	44	7.33759	1.66769	4.18237	10.1216	579.577	576.696	21.375	0.831449	0.429372	0.0506497	1.81317	0.738671	4.46913	0.589695	31.1547	915.128	1.10363	1.44792	1.81317	0.540556	0.247081	0.578913	0.0522861	4.20567	0.313784	4.0644	0.466817	30.617	884.835	1.00649	1.47298	4.20567	0.684174	0.0949095	0.369463	1.86e-06	6	236	c
1223	696	99	14.3996	2.11297	9.59039	17.8367	32.7118	587.887	33.7608	0.525279	0.461727	0.0318002	1.81867	0.822614	6.1263	0.608373	30.977	903.143	1.23724	1.65449	1.81867	0.543125	0.276948	0.642251	0.0203212	5.66938	0.477623	6.42653	0.437125	30.6336	882.06	1.20527	1.83936	5.66938	0.742298	0.0981228	0.415778	1.07e-06	6	1380	c
1224	271	58	9.27772	2.56201	4.59737	13.7702	155.404	597.984	27.0362	0.861939	-1.15253	0.0553145	1.13456	0.753761	3.30377	0.650171	35.5158	1195.94	1.05045	1.38611	1.13456	0.458505	0.236233	0.556923	0.0367403	3.1039	0.400616	3.58924	0.477352	35.3636	1186.17	1.02822	1.5391	3.1039	0.623388	0.0926948	0.372757	1.74e-06	5	338	c
1225	418	69	11.1725	1.74119	7.63559	14.5058	607.067	597.336	28.0721	0.720317	1.13948	0.0901538	0.562218	0.835362	2.70743	0.775371	24.1109	542.609	0.951854	1.1423	0.562218	0.360053	0.355893	0.624618	0.0619209	1.3545	0.611729	2.74427	0.645814	24.2222	547.849	0.936473	1.2734	1.3545	0.496938	0.148178	0.429377	1.9e-06	8	1481	c
1226	264	60	9.34149	3.35699	3.88165	15.5928	704.386	606.431	30.8618	0.928571	-1.24412	0.168995	0.401475	0.707232	1.68565	0.815701	29.9125	851.664	0.769399	0.9056	0.401475	0.309158	0.293103	0.517007	0.131746	0.828571	0.355078	1.64238	0.7	29.8	847.704	0.714559	0.97671	0.828571	0.408921	0.0840952	0.286651	1.5e-06	6	1553	c
1227	390	71	11.1594	2.98992	5.8244	16.302	322.549	607.7	33.4224	0.870705	-1.13302	0.0336527	2.08844	0.81155	6.54111	0.587964	29.2584	805.825	1.22713	1.63784	2.08844	0.564357	0.27307	0.635822	0.0224722	5.65635	0.476273	6.40009	0.432032	28.6223	768.991	1.18059	1.77069	5.65635	0.732204	0.102412	0.4171	2.05e-06	7	734	c
1228	259	65	8.83406	1.97262	4.58833	12.9973	350.652	609.732	23.722	0.75031	-1.32693	0.0404347	1.33369	0.819559	4.69566	0.650226	33.2687	1045.5	1.14316	1.48305	1.33369	0.492997	0.297387	0.635872	0.0279278	3.94444	0.487019	4.84463	0.502344	33.1019	1034.79	1.11191	1.63353	3.94444	0.670684	0.126597	0.445088	2.09e-06	7	792	c
1229	631	84	13.7296	1.33067	10.6033	16.7268	238.723	614.931	32.0622	0.56879	1.45915	0.0662958	0.744118	0.835839	3.26643	0.726261	33.7777	1079.39	1.05058	1.2873	0.744118	0.398136	0.348488	0.64742	0.0446021	1.76882	0.614338	3.29322	0.582822	33.6039	1068.59	1.02804	1.43754	1.76882	0.532126	0.160458	0.470968	1.76e-06	5	715	c
[truncated: 1,155 more rows]
