# Supplementary material for: Characteristics of auto-quantified tumor-infiltrating lymphocytes and the prognostic value in adenocarcinoma of the esophagogastric junction, gastric adenocarcinoma, and esophageal squamous cell carcinoma
Source: Aging (Albany NY). 2024 Jul 5;16(13):11027–61. doi: 10.18632/aging.205999 (PMC11272125; doi:10.18632/aging.205999)
Supplement: Supplementary Dataset 2 [file aging-16-205999-s004.xls]

## Sheet: ESCCtrainingset
Supplementary Dataset 2. ESCC cell feature training set
index	s.area	s.perimeter	s.radius.mean	s.radius.sd	s.radius.min	s.radius.max	m.cx	m.cy	m.majoraxis	m.eccentricity	m.theta	h.asm.s1	h.con.s1	h.cor.s1	h.var.s1	h.idm.s1	h.sav.s1	h.sva.s1	h.sen.s1	h.ent.s1	h.dva.s1	h.den.s1	h.f12.s1	h.f13.s1	h.asm.s2	h.con.s2	h.cor.s2	h.var.s2	h.idm.s2	h.sav.s2	h.sva.s2	h.sen.s2	h.ent.s2	h.dva.s2	h.den.s2	h.f12.s2	h.f13.s2	densityValues	numberNeighbors	sizeCytoplasma	classCell
1	96	32	5.11049	0.988269	3.1275	6.65442	526.699	11.7167	12.6348	0.490396	-0.229699	0.0300256	3.09509	0.646337	5.37576	0.484875	30.9969	905.188	1.151	1.64721	3.09509	0.624981	0.16984	0.513235	0.0364224	6.31343	0.287135	5.42821	0.400815	31.0597	910.725	1.07095	1.53561	6.31343	0.745509	0.128671	0.436311	3.65e-06	6	185	c
2	109	34	5.51762	1.11709	3.2741	7.27702	392.021	12.8098	15.7956	0.785347	0.482683	0.0454639	4.82181	0.582399	6.77323	0.499679	28.7633	781.48	1.13707	1.62668	4.82181	0.716107	0.137312	0.461777	0.0569778	7.72	0.18787	5.75293	0.40584	27.96	737.309	1.01528	1.475	7.72	0.785893	0.120336	0.414845	6.06e-06	8	371	c
3	139	43	6.48007	2.07772	3.45316	9.84501	457.154	12.538	21.31	0.907221	0.0810656	0.0504317	2.92739	0.590719	4.57625	0.574883	30.1763	857.987	1.07979	1.49624	2.92739	0.625758	0.166856	0.488299	0.0431042	5.71963	0.233208	4.72958	0.451047	30.1869	860.702	1.00639	1.48841	5.71963	0.730633	0.110923	0.400462	5.95e-06	8	174	c
4	44	20	3.30219	0.650393	2.15	4.16203	366.038	14.7407	9.51176	0.768255	0.0402673	0.0343926	2.77698	0.521604	3.90239	0.435952	34.6475	1138.16	1.04209	1.51923	2.77698	0.552947	0.133472	0.441917	0.0529132	7.96552	-0.150537	4.46165	0.260368	34.6552	1143.49	0.926672	1.29886	7.96552	0.738115	0.0877017	0.335131	6.03e-06	8	137	c
5	64	24	4.09876	0.785375	2.5	5.22015	496.894	15.4204	11.1541	0.735962	-0.269706	0.0268974	3.64929	0.557042	5.11922	0.457432	33.6398	1070.03	1.12511	1.6408	3.64929	0.654583	0.131594	0.45427	0.0515928	6.84211	0.0385364	4.55817	0.380445	33.3684	1058.54	0.947032	1.37366	6.84211	0.768741	0.089182	0.346905	5.27e-06	7	122	c
6	41	19	3.19614	0.434909	2.29778	4.21349	429.106	17.1123	8.34301	0.634863	0.663921	0.0506287	2.01562	0.406811	2.69897	0.498437	35.2812	1185.91	0.913691	1.34839	2.01562	0.510854	0.107524	0.37691	0.0960744	2.81818	-0.267658	2.11157	0.463636	34.9091	1175.84	0.642374	1.05816	2.81818	0.580714	0.112466	0.344197	6.89e-06	9	878	c
7	243	56	8.59468	2.40072	4.72192	12.6848	445.1	22.5484	26.0482	0.862945	0.207969	0.0397253	1.96216	0.734322	4.69274	0.588814	31.8154	954.543	1.12769	1.52607	1.96216	0.553817	0.211651	0.550613	0.0332548	3.98421	0.462353	4.70523	0.466865	31.5526	938.644	1.09271	1.58085	3.98421	0.677712	0.0936391	0.379265	7.41e-06	7	878	c
8	85	29	4.72485	0.586543	3.48702	5.81206	332.407	22.832	11.8697	0.541761	0.271362	0.038321	3.50694	0.597261	5.35387	0.488515	31.0347	909.312	1.11143	1.56476	3.50694	0.658142	0.158053	0.485287	0.0334911	9.10769	0.150514	6.36071	0.328694	31.4154	932.995	1.07301	1.5883	9.10769	0.785681	0.0984273	0.389381	6.65e-06	10	361	c
9	184	50	7.97652	3.03722	3.16708	12.715	355.509	30.8717	28.2058	0.943375	0.724979	0.0439292	2.70342	0.615727	4.51757	0.553069	31.3121	924.262	1.09795	1.55299	2.70342	0.612138	0.150878	0.473146	0.0320182	5.70548	0.288457	5.00923	0.421474	31.5274	936.424	1.09562	1.62602	5.70548	0.739132	0.0861111	0.368941	8.42e-06	11	234	c
10	150	40	6.77987	1.88886	3.625	9.80003	309.768	29.2261	20.951	0.875307	-0.659457	0.0239956	4.97909	0.632862	7.78095	0.450451	28.9259	790.66	1.20375	1.78721	4.97909	0.717724	0.149066	0.500139	0.0409898	8.65138	0.296319	7.14723	0.449445	28.5229	767.474	1.10878	1.5727	8.65138	0.796568	0.154007	0.480424	6.97e-06	11	361	c
11	229	78	10.3566	5.11938	2.09889	18.7479	486.07	27.1421	41.6151	0.981724	-0.0630108	0.0345699	2.52224	0.494172	3.49317	0.509205	33.3609	1052.24	1.0376	1.52626	2.52224	0.588628	0.084571	0.35509	0.0379947	4.10759	0.090468	3.25808	0.407173	33.2089	1045.71	0.947675	1.51607	4.10759	0.660487	0.0339495	0.225857	6.76e-06	9	878	c
12	282	88	10.6607	5.09728	0.267468	20.1061	111.061	38.6185	41.0472	0.948166	-0.423614	0.0315935	2.50562	0.777103	6.62057	0.577616	32.6261	1008.73	1.18167	1.63321	2.50562	0.584646	0.235633	0.594587	0.0239268	5.8867	0.516736	7.09057	0.445101	32.6749	1010.67	1.17573	1.71831	5.8867	0.713383	0.172175	0.525875	4.89e-06	7	602	c
13	167	42	6.90101	1.19058	5.10196	9.22117	427.193	35.3024	18.5156	0.718265	0.509531	0.0354301	2.91077	0.714473	6.0972	0.533241	28.803	780.365	1.18263	1.62298	2.91077	0.628175	0.216214	0.570325	0.0456034	5.53175	0.356396	5.29748	0.460856	28.3571	756.94	1.05728	1.51048	5.53175	0.736489	0.123416	0.424484	8.46e-06	11	218	c
14	74	26	4.40392	0.624103	3.51708	5.5526	265.409	40.8501	11.513	0.656755	-1.33723	0.0433945	4.14056	0.489728	5.05721	0.478033	31.6586	948.655	1.05526	1.56855	4.14056	0.675006	0.132203	0.446229	0.0262574	9.38462	-0.0134995	5.62981	0.314098	31.5	938.074	1.02149	1.6391	9.38462	0.812502	0.138656	0.465479	6.87e-06	4	89	c
15	187	50	7.71087	2.19281	3.18025	11.6565	285.36	46.2737	23.4645	0.845013	-0.721891	0.0305306	2.83866	0.734646	6.34881	0.52823	31.8037	955.617	1.1922	1.66908	2.83866	0.622643	0.199269	0.555745	0.0276737	6.02041	0.434331	6.3215	0.385616	31.8163	957.417	1.12185	1.66784	6.02041	0.740583	0.116918	0.432513	8.6e-06	8	278	c
16	239	61	8.80172	2.99812	3.71307	13.8375	470.551	42.8359	29.2962	0.921113	-0.0167522	0.0377785	1.87104	0.726836	4.42476	0.596249	32.4033	990.043	1.12686	1.53457	1.87104	0.548971	0.219694	0.561494	0.0291421	4.57979	0.353974	4.54458	0.463779	32.1543	975.007	1.08323	1.63293	4.57979	0.701686	0.0934972	0.384699	7.67e-06	12	290	c
17	212	65	8.99903	3.87951	2.93217	15.3517	522.818	43.0329	33.974	0.962339	0.0553488	0.0274463	3.47226	0.66657	6.20688	0.501831	30.6116	882.921	1.19113	1.697	3.47226	0.66198	0.167674	0.516699	0.0195021	8.2071	0.290841	6.7865	0.365622	30.8225	894.775	1.16045	1.7963	8.2071	0.809388	0.0820593	0.377464	5.81e-06	9	300	c
18	51	24	3.64317	1.17403	1.625	5.25744	390.993	41.6751	11.918	0.881128	-0.171257	0.0793758	1.77019	0.328465	2.31801	0.569565	34.5528	1139.45	0.848951	1.24681	1.77019	0.520928	0.0783735	0.310968	0.0679012	3.81481	-0.148936	2.66015	0.415468	34.6296	1147.67	0.794058	1.24276	3.81481	0.633484	0.0690191	0.291562	9.12e-06	10	121	c
19	129	38	6.01914	1.05979	4.22579	7.99766	445.283	45.2829	15.184	0.562917	-0.791295	0.0346804	3.29688	0.630762	5.46443	0.509794	29.4219	813.813	1.15083	1.62999	3.29688	0.64998	0.169567	0.510548	0.0354017	8.53684	0.136697	5.94429	0.350386	28.9579	787.671	1.09339	1.66217	8.53684	0.814179	0.0821039	0.364211	8.15e-06	9	285	c
20	175	45	7.12507	1.41345	4.45621	9.91923	87.0303	46.4703	18.8818	0.718538	-0.211763	0.0507674	2.28226	0.599256	3.84753	0.550268	31.4855	935.759	1.04455	1.48811	2.28226	0.570563	0.14791	0.459944	0.0507059	4.15909	0.234564	3.71681	0.438423	31.2045	919.217	0.996788	1.50095	4.15909	0.669893	0.0718083	0.325226	5.4e-06	7	602	c
21	159	39	6.79364	1.18072	4.26266	8.4802	331.053	46.844	18.4481	0.76068	-0.993855	0.0596664	2.97699	0.599662	4.7181	0.55756	29.8478	840.27	1.0663	1.49017	2.97699	0.629285	0.152963	0.467672	0.0587463	7.51562	0.146738	5.40405	0.42997	29.9062	845.844	0.997027	1.48446	7.51562	0.777085	0.0956747	0.372249	9.86e-06	15	243	c
22	91	30	5.08979	1.0978	3.46731	6.94902	117.212	47.6093	14.5772	0.795181	-0.741564	0.0584357	4.79288	0.543242	6.24663	0.491125	27.9385	737.19	1.08715	1.52173	4.79288	0.71682	0.151187	0.469389	0.0683956	6.57377	0.0786297	4.56739	0.438392	27.3279	705.252	0.916581	1.31837	6.57377	0.7511	0.05908	0.277712	6.52e-06	10	119	c
23	86	28	4.87717	1.02343	2.87006	6.39375	347.383	47.1452	13.6935	0.778123	-0.617773	0.0335494	3.4055	0.516364	4.52072	0.495337	31.055	908.417	1.09268	1.61255	3.4055	0.647289	0.119703	0.430824	0.044615	7.33871	0.0806733	4.99135	0.403828	31.0484	910.567	1.01607	1.48929	7.33871	0.787403	0.111333	0.401287	9.88e-06	14	299	c
24	155	44	7.07979	2.36407	3.21099	10.5912	140.764	49.6538	23.8892	0.922169	-0.543736	0.0349726	3.86111	0.699299	7.42018	0.502812	30.8056	898.813	1.19148	1.70774	3.86111	0.681491	0.177057	0.53134	0.0322788	6.15741	0.415106	6.2637	0.39991	29.9722	846.819	1.12916	1.62121	6.15741	0.751772	0.13391	0.455619	7.12e-06	11	436	c
25	95	29	5.15405	0.97009	3.25017	6.50555	367.205	48.7125	14.0668	0.735839	-0.757995	0.0282698	2.97846	0.62924	5.0167	0.488706	30.6523	883.721	1.14582	1.63475	2.97846	0.617392	0.171813	0.514341	0.0354938	7.69444	0.212789	5.88715	0.370307	30.75	890.739	1.10401	1.57842	7.69444	0.796674	0.11327	0.415506	9.67e-06	13	299	c
26	188	55	8.49588	3.39632	2.47413	14.3993	400.938	57.5597	30.4763	0.950495	-0.589646	0.0242564	3.48313	0.649476	5.96846	0.481659	32.0199	966.68	1.19318	1.71858	3.48313	0.657483	0.152398	0.496856	0.0249947	7	0.314865	6.10849	0.396787	31.971	963.701	1.14461	1.70196	7	0.788962	0.140898	0.476852	8.67e-06	10	252	c
27	182	57	7.87086	3.22973	2.56236	13.1491	541.565	53.5345	28.1401	0.945821	-0.0541145	0.0829482	1.52373	0.357742	2.18623	0.628379	36.0712	1242.6	0.866377	1.24658	1.52373	0.517912	0.0659315	0.285446	0.0772959	2.35714	0.00448199	2.18388	0.554538	36.5143	1278.19	0.79584	1.23792	2.35714	0.579412	0.0470023	0.24051	5.17e-06	8	204	c
28	147	43	6.4817	1.56369	2.87056	9.46514	180.606	56.6073	18.281	0.759475	0.870571	0.0311541	3.24462	0.631973	5.40813	0.496519	32.8689	1020.35	1.15196	1.63526	3.24462	0.644478	0.156386	0.492206	0.0395455	7.15455	0.161188	5.26469	0.386192	32.4818	998.917	1.03325	1.55632	7.15455	0.772871	0.0744229	0.336671	7.98e-06	10	459	c
29	101	34	5.33505	1.45582	2.73972	7.80499	507.377	55.419	16.0709	0.852921	-0.299864	0.0683176	1.29155	0.541082	2.40716	0.627114	36.481	1268.76	0.922329	1.26937	1.29155	0.480128	0.124743	0.394193	0.0494589	3.2716	0.134074	2.88908	0.442193	36.7531	1288.81	0.912859	1.3952	3.2716	0.619559	0.0345345	0.218738	6.65e-06	12	147	c
30	151	40	6.69323	1.84408	3.5	9.6566	149.382	57.8404	20.1734	0.856892	-0.398116	0.0311641	3.93585	0.617339	6.14274	0.540529	30.2189	860.253	1.17378	1.67875	3.93585	0.666595	0.180786	0.532635	0.0262675	7.33929	0.264006	5.98597	0.414901	29.8571	838.373	1.12095	1.66985	7.33929	0.755985	0.141259	0.473454	8.4e-06	12	436	c
31	138	39	6.64636	2.14761	2.848	9.91287	302.979	59.0855	21.5607	0.913441	-0.785067	0.0356279	2.1858	0.665965	4.27182	0.565243	32.7662	1013.34	1.10494	1.55708	2.1858	0.569002	0.174046	0.506787	0.0255	5.11	0.332371	4.82698	0.414424	32.39	990.089	1.08679	1.66844	5.11	0.704633	0.0853628	0.3718	1.03e-05	13	254	c
32	56	23	3.80738	0.713793	2.76523	4.98201	274.167	57.6424	10.665	0.757433	-1.20155	0.0423711	2.21429	0.466673	3.07592	0.506044	36.1923	1245.55	0.986297	1.44384	2.21429	0.544956	0.10579	0.38593	0.0519395	4.41026	-0.0393554	3.12163	0.384012	36.359	1262.76	0.881018	1.35811	4.41026	0.640515	0.0760913	0.319152	9.44e-06	5	142	c
33	62	24	3.98552	0.476166	3.13138	4.84481	316.339	57.7723	10.0213	0.553394	-0.276136	0.0335396	4.49268	0.547593	5.96531	0.447125	31.2146	919.99	1.13771	1.67777	4.49268	0.69834	0.120619	0.440169	0.034188	6.30769	0.138315	4.66009	0.345423	30.9744	904.989	1.03014	1.50601	6.30769	0.722445	0.102095	0.386758	1.04e-05	14	254	c
34	87	32	5.0958	1.74933	2.07006	7.69156	165.085	60.7198	17.3526	0.911753	-0.43644	0.0402653	7.46021	0.374636	6.96469	0.407168	28.8581	784.493	1.14361	1.6706	7.46021	0.790394	0.0916586	0.385052	0.0377527	14.8276	-0.141628	7.49405	0.313944	28.7586	779.07	1.04724	1.53637	14.8276	0.884767	0.12111	0.423889	8.71e-06	13	100	c
35	216	55	7.94925	2.22535	2.25286	11.1226	187.875	69.9391	23.0528	0.76836	-0.544256	0.0421434	2.94263	0.684247	5.65971	0.535112	31.7066	949.97	1.14076	1.58426	2.94263	0.633412	0.198986	0.543475	0.0336593	6.10714	0.294476	5.32809	0.403773	31.2619	922.214	1.07899	1.60415	6.10714	0.754136	0.0833266	0.360818	9.4e-06	10	459	c
36	477	88	12.2382	3.50635	5.81628	19.1082	434.303	73.439	35.975	0.834478	-0.666438	0.0396531	1.67788	0.758137	4.46866	0.607314	34.2457	1109.27	1.12364	1.51383	1.67788	0.523481	0.226342	0.566111	0.0307087	3.43951	0.541811	4.75337	0.486157	34.0617	1097.64	1.10624	1.62027	3.43951	0.646228	0.115709	0.424788	7.53e-06	9	640	c
37	222	67	8.23353	3.00049	2.87502	13.2647	244.757	74.4854	27.7409	0.895966	-1.42157	0.0299115	2.72962	0.615458	4.54919	0.539353	34.564	1130.19	1.11668	1.6089	2.72962	0.613962	0.139315	0.46271	0.027181	5.86747	0.224448	4.78277	0.382247	34.6024	1134.54	1.05727	1.63628	5.86747	0.743907	0.0794353	0.355799	9.55e-06	6	660	c
38	100	31	5.24689	0.81594	3.7885	6.67188	333.892	66.5981	13.1362	0.575887	1.01232	0.030948	2.30029	0.698787	4.81838	0.531085	34.9767	1158.97	1.12416	1.57568	2.30029	0.575026	0.183609	0.522302	0.0328897	6.69444	0.197521	5.1711	0.331105	34.8056	1148.58	1.06261	1.55702	6.69444	0.742699	0.112739	0.412001	1.03e-05	15	297	c
39	190	45	7.39476	1.43398	4.71111	10.0827	544.752	67.8481	20.2867	0.773473	-0.169155	0.0436678	2.70294	0.619545	4.55225	0.534147	31.3794	927.472	1.11448	1.5631	2.70294	0.59886	0.161934	0.490659	0.033058	6.28846	0.234098	5.10527	0.385864	31.5449	937.707	1.08877	1.64633	6.28846	0.745013	0.0804006	0.358919	5.16e-06	7	224	c
40	296	67	10.9765	4.46339	3.7452	18.839	404.06	77.1341	38.3931	0.953102	-0.930818	0.0291143	2.62476	0.727836	5.82203	0.546735	31.9178	960.773	1.1914	1.65692	2.62476	0.602603	0.209408	0.566818	0.0268969	6.17467	0.369704	5.89823	0.454316	31.6681	945.674	1.13526	1.71453	6.17467	0.753239	0.1215	0.445999	8e-06	11	940	c
41	58	25	3.88217	1.05716	2.02267	5.47825	63.9918	66.7172	11.8405	0.836145	0.241905	0.0380337	3.64171	0.49867	4.63205	0.520141	33.4278	1057.22	1.08078	1.53715	3.64171	0.658985	0.123148	0.427403	0.0605956	9.02632	-0.143183	4.94789	0.303751	33.6053	1074.55	0.928301	1.26973	9.02632	0.771502	0.152845	0.435341	6.48e-06	8	300	c
42	50	21	3.57664	0.467966	2.36806	4.67395	73.8259	68.4919	8.45107	0.349513	-0.214869	0.0414062	2.75	0.627103	4.68734	0.493439	33.025	1033.75	1.06022	1.48114	2.75	0.591302	0.17605	0.498679	0.0529337	5.82143	0.179063	4.5456	0.391511	32.6786	1012.35	0.992768	1.33417	5.82143	0.715913	0.129243	0.410305	7.21e-06	11	300	c
43	101	37	5.52885	1.9732	1.77001	8.66637	306.659	71.0466	18.8994	0.911194	-0.218379	0.023406	4.13905	0.55119	5.61114	0.452651	31.8136	954.409	1.1525	1.71665	4.13905	0.686204	0.11664	0.437659	0.0222222	8.78667	0.133419	6.06973	0.293199	31.88	959.51	1.0901	1.72192	8.78667	0.794508	0.112344	0.430488	1.04e-05	14	140	c
44	148	39	6.40025	0.683693	5.22127	7.9198	256.805	76.1023	15.4995	0.512752	1.06427	0.0245014	2.66031	0.77473	6.9047	0.530852	32.5725	1004.11	1.21722	1.6946	2.66031	0.605474	0.230451	0.59737	0.0238964	6.58491	0.420039	6.67702	0.411835	31.9057	961.373	1.16075	1.71608	6.58491	0.760202	0.153528	0.498263	9.73e-06	6	660	c
45	392	88	12.3412	4.92177	4.78572	20.9104	506.912	75.0899	42.3853	0.945037	0.00697558	0.0368717	1.85634	0.782414	5.26575	0.623333	32.9577	1025.31	1.17561	1.55623	1.85634	0.546964	0.280423	0.630907	0.02778	3.70701	0.589789	5.51842	0.484785	32.9045	1021.89	1.1629	1.66348	3.70701	0.663841	0.151628	0.48872	6.6e-06	10	612	c
46	198	49	7.49806	1.48342	3.84216	9.74716	141.846	78.0298	19.3602	0.661433	-1.06957	0.0414909	1.58014	0.733191	3.96118	0.607472	34.7433	1143.1	1.08569	1.47491	1.58014	0.512488	0.212814	0.54424	0.0407284	3.05806	0.453519	3.79796	0.4964	34.4903	1127.07	1.0398	1.51548	3.05806	0.629996	0.0992235	0.382543	1.01e-05	13	553	c
47	51	21	3.66754	0.731799	2.43277	4.80221	289.501	74.0897	10.3992	0.78632	0.901403	0.0770003	2.06098	0.25098	2.37578	0.551435	34.8171	1157.57	0.844673	1.25425	2.06098	0.552601	0.0366056	0.213757	0.0868014	2.7931	-0.0674847	2.30826	0.467546	34.7931	1161.6	0.746627	1.17563	2.7931	0.578229	0.086105	0.316827	1.02e-05	12	56	c
48	141	40	6.35587	1.54267	3.87919	8.74346	40.8702	77.2734	18.8678	0.840047	-0.0924832	0.0417684	4.03846	0.65973	6.9342	0.525167	28.4676	766.065	1.14789	1.63518	4.03846	0.667168	0.155049	0.490211	0.0372443	8.69725	0.259386	6.87164	0.416387	28.6055	770.372	1.11764	1.62478	8.69725	0.806911	0.143878	0.47188	5.76e-06	6	234	c
49	101	34	5.38603	1.55582	2.47566	7.90827	120.818	79.2323	16.507	0.855664	-0.702911	0.0280727	3.62281	0.582288	5.33649	0.507803	31.6345	943.186	1.14741	1.67314	3.62281	0.661064	0.149355	0.486482	0.0288711	7.92647	0.121634	5.51206	0.414972	31.6029	941.227	1.08893	1.59944	7.92647	0.74311	0.197158	0.543314	9.81e-06	14	181	c
50	60	26	4.01711	1.31235	1.98701	5.87908	532.465	78.9202	13.2414	0.889913	0.276583	0.0380816	3.08808	0.424848	3.68458	0.486254	34.1347	1103.61	1.02936	1.52724	3.08808	0.619867	0.0954836	0.376813	0.0577064	3.64865	0.116007	3.06373	0.4853	34.3514	1123.19	0.906065	1.30273	3.64865	0.661176	0.160912	0.451497	5.6e-06	8	612	c
51	187	47	7.4135	1.71766	3.89821	10.4629	192.508	84.1283	20.9783	0.788664	-0.365363	0.0462717	1.89023	0.736571	4.58774	0.596486	33.1203	1037.5	1.10403	1.49775	1.89023	0.550464	0.229221	0.566942	0.046345	3.88028	0.400139	4.23432	0.483356	32.6549	1008.92	1.03424	1.51305	3.88028	0.680449	0.110638	0.402977	9.65e-06	8	228	c
52	62	25	4.15223	1.18142	1.95018	5.82436	215.118	81.7684	12.881	0.869044	0.795493	0.070419	1.37313	0.467723	2.28987	0.6	37.2438	1326.82	0.870221	1.22667	1.37313	0.47624	0.10589	0.358	0.0609418	2.26316	0.388702	2.85111	0.496285	37.7368	1360.66	0.919433	1.26181	2.26316	0.53774	0.112054	0.372968	9.42e-06	8	99	c
53	216	54	8.32933	2.17278	4.56773	12.5909	53.7983	87.2568	24.2261	0.850437	-0.350222	0.0815074	3.26693	0.541311	4.56115	0.582964	28.8086	783.762	1.0096	1.41334	3.26693	0.627237	0.119348	0.405234	0.0654047	5.96491	0.202812	4.74122	0.472886	28.7836	782.492	0.971898	1.44378	5.96491	0.737021	0.066245	0.306895	7.18e-06	7	606	c
54	157	43	6.5999	1.36162	3.2251	9.11714	363.633	86.8896	17.9562	0.73586	-0.356821	0.0267012	2.59891	0.784488	7.02963	0.533813	32.1633	978.502	1.22821	1.69356	2.59891	0.601879	0.221509	0.586664	0.0222795	7.48739	0.438485	7.66713	0.370309	31.8067	955.796	1.20256	1.76216	7.48739	0.793081	0.12435	0.456468	8.74e-06	9	357	c
55	292	67	9.91573	3.45038	4.96676	16.0102	289.6	88.7255	33.0534	0.929241	0.26278	0.0299637	2.4188	0.775151	6.37872	0.546086	32.1472	977.16	1.19459	1.64454	2.4188	0.594742	0.227141	0.586407	0.0228072	6.36087	0.386269	6.18213	0.37376	31.613	942.012	1.15579	1.7503	6.36087	0.762769	0.0725523	0.351363	9.57e-06	10	384	c
56	41	19	3.15878	0.49368	2.33722	3.91212	162.708	85.3755	8.59951	0.690054	0.205417	0.0490956	2.41085	0.310368	2.74793	0.517966	35.9767	1232.78	0.931007	1.39911	2.41085	0.568486	0.0858392	0.34341	0.0850662	2.86957	-0.202853	2.19282	0.452174	35.4783	1211.66	0.696677	1.10161	2.86957	0.576223	0.138033	0.388187	1.01e-05	13	553	c
57	85	32	4.90466	1.47836	2.59375	7.17914	490.865	85.7104	15.8713	0.890218	-0.0621427	0.0370338	2.77113	0.575293	4.2624	0.500518	35.1444	1171.34	1.06996	1.51633	2.77113	0.60835	0.119645	0.418915	0.0285645	6.84375	-0.00950735	4.38965	0.297214	35.5625	1203.26	0.971457	1.57141	6.84375	0.712154	0.117761	0.422497	6.87e-06	8	95	c
58	104	38	5.27296	0.961463	2.54598	6.89072	350.006	90.2107	12.7434	0.359754	-0.819205	0.0336943	2.98854	0.661488	5.41423	0.51005	32.2378	981.497	1.14396	1.61294	2.98854	0.6301	0.186938	0.53193	0.0325268	6.96203	0.245476	5.61352	0.337405	32.2785	985.434	1.07044	1.59812	6.96203	0.756805	0.100112	0.393704	8.91e-06	10	357	c
59	278	74	9.23733	2.41313	4.56159	14.2363	42.8376	99.5027	25.699	0.757452	0.327571	0.061345	1.21509	0.68437	2.92486	0.652719	35.156	1173.82	0.989728	1.30915	1.21509	0.475566	0.197288	0.499146	0.0577665	2.17241	0.417557	2.86491	0.54561	34.7931	1150.72	0.948839	1.35746	2.17241	0.566505	0.0860242	0.338928	7.02e-06	7	606	c
60	255	62	8.87754	2.34343	3.80843	13.507	327.825	94.8701	24.5285	0.713269	0.2357	0.024965	2.64474	0.773046	6.82658	0.513382	32.0263	968.412	1.24076	1.71437	2.64474	0.601089	0.230574	0.600274	0.0203656	6.36181	0.459002	6.8797	0.395706	31.7186	948.664	1.19799	1.78173	6.36181	0.762694	0.124049	0.458184	9.05e-06	13	354	c
61	183	50	7.51754	2.30151	2.90338	11.187	520.029	93.1883	23.0752	0.882286	-0.35428	0.0377519	1.96579	0.653418	3.83596	0.562374	36.5319	1267.02	1.06858	1.49805	1.96579	0.549388	0.150141	0.464613	0.032449	3.87857	0.29855	3.76468	0.428342	36.6643	1278.04	1.01522	1.54712	3.87857	0.662368	0.0842356	0.356656	5.74e-06	8	236	c
62	66	27	4.24522	1.33027	1.54716	6.235	132.393	91.5784	13.6327	0.882891	-0.377377	0.127626	0.995349	0.395099	1.82274	0.653023	37.4698	1349.23	0.769106	1.00027	0.995349	0.424243	0.0982058	0.313286	0.078125	2.375	-0.0172668	2.16734	0.5025	37.175	1327.13	0.77675	1.15042	2.375	0.564437	0.0233873	0.163879	1.01e-05	12	553	c
63	110	40	5.86392	2.29007	1.45602	9.57706	450.355	95.7136	20.4434	0.925916	-0.55026	0.0763159	1.26087	0.399027	2.04902	0.62679	38.8207	1446.2	0.830281	1.16994	1.26087	0.47292	0.0719605	0.289183	0.0942323	1.55556	0.0363289	1.8071	0.605556	38.7778	1449.93	0.721827	1.10467	1.55556	0.510432	0.0163049	0.134148	7.49e-06	7	179	c
64	175	55	7.94618	3.27727	1.84131	12.895	91.5934	96.1579	28.7051	0.945024	-0.261173	0.0334645	3.15423	0.56935	4.66218	0.499213	31.3499	924.905	1.12723	1.61745	3.15423	0.636341	0.135514	0.457737	0.0217062	7.9084	0.114056	5.46326	0.33713	31.4962	934.461	1.09033	1.74313	7.9084	0.796484	0.0491859	0.290081	9.37e-06	10	241	c
65	41	20	3.17925	0.860153	1.55	4.28981	147.999	93.5616	9.81562	0.832898	-0.264908	0.0807242	1.74803	0.171544	2.05499	0.578416	37.748	1368.16	0.792828	1.20045	1.74803	0.531737	0.0298445	0.188987	0.0661157	3.54545	-0.0847029	2.6343	0.372727	37.9091	1382.89	0.762169	1.2123	3.54545	0.553604	0.188578	0.472309	1.01e-05	13	553	c
66	459	104	14.4725	6.68773	3.07166	26.0542	373.127	106.133	55.8424	0.973295	-0.261608	0.0331092	2.58575	0.773283	6.70259	0.543192	31.8128	957.199	1.20276	1.64478	2.58575	0.606534	0.224959	0.583879	0.0246416	6.16253	0.413555	6.25414	0.391524	31.4132	930.475	1.154	1.74174	6.16253	0.7529	0.0801412	0.367877	8.01e-06	6	940	c
67	265	56	8.90265	2.2927	3.6308	12.1378	479.502	106.056	26.0893	0.813225	-0.982277	0.0260808	2.40188	0.811102	7.35761	0.567799	31.7505	953.282	1.25046	1.69822	2.40188	0.584936	0.264122	0.635267	0.0235852	5.41333	0.57057	7.30293	0.417521	31.7067	949.999	1.20747	1.7399	5.41333	0.728844	0.134449	0.470969	7.01e-06	5	292	c
68	209	55	7.83192	1.678	3.96001	10.3735	427.705	102.75	20.6958	0.730903	-0.122666	0.0986852	0.852703	0.587883	2.03454	0.698514	38.8851	1450	0.849386	1.11957	0.852703	0.413659	0.160001	0.420626	0.0811204	1.74138	0.174225	2.05439	0.569878	38.9713	1460.46	0.787651	1.192	1.74138	0.525378	0.0425028	0.224603	7.71e-06	5	629	c
69	84	29	4.74614	0.843095	2.87761	6.1508	256.95	101.923	12.6824	0.692469	-0.106791	0.0381993	4.68662	0.480492	5.51063	0.47329	29.8556	838.845	1.1243	1.62975	4.68662	0.713605	0.115008	0.424669	0.0594993	5.83333	0.046391	4.05856	0.407698	29.3148	811.437	0.941657	1.32879	5.83333	0.746588	0.0441702	0.241356	8.54e-06	5	128	c
70	120	42	6.32634	2.57024	2.43289	10.4615	122.544	104.378	22.6782	0.948263	-0.375249	0.0573175	2.38025	0.449561	3.16213	0.554961	33.3383	1053.52	0.977049	1.40414	2.38025	0.585705	0.0864378	0.345162	0.0667014	5.30488	-0.0570298	3.50933	0.429781	33.5732	1074.25	0.869651	1.33805	5.30488	0.725754	0.0480035	0.252373	1e-05	7	252	c
71	66	28	4.26538	0.978298	2.38886	6.08213	292.089	103.444	11.9741	0.743031	1.07072	0.033208	2.60377	0.601978	4.27089	0.501195	34.1038	1100.12	1.09405	1.56069	2.60377	0.592435	0.157292	0.483629	0.0374483	5.84091	0.10901	4.27776	0.336641	33.8409	1085.74	1.00081	1.49519	5.84091	0.711943	0.0748448	0.331292	8.7e-06	7	198	c
72	340	67	10.0976	1.89761	5.53601	13.6482	410.219	109.106	24.9612	0.658181	-0.302209	0.0549713	1.16961	0.741609	3.26326	0.662051	36.5008	1265.63	1.03602	1.37082	1.16961	0.467673	0.227694	0.544867	0.0420525	2.55903	0.448605	3.3205	0.530988	36.6146	1275.27	0.997892	1.47006	2.55903	0.593405	0.0974252	0.373858	7.8e-06	6	629	c
73	127	44	6.36756	2.40719	2.97727	10.1936	179.197	107.915	22.1292	0.935839	0.0898946	0.0422158	3.77829	0.579758	5.49537	0.486251	31.7367	950.983	1.12986	1.59242	3.77829	0.677419	0.134057	0.452241	0.0325385	10.6224	0.107872	6.95343	0.332565	32.051	970.964	1.10311	1.57032	10.6224	0.817015	0.135392	0.451568	9.31e-06	9	186	c
74	84	31	4.69695	0.797416	2.88705	5.85961	299.633	109.983	11.2968	0.366559	-1.00678	0.0334152	2.53381	0.661709	4.74501	0.508794	35.4448	1190.37	1.12389	1.5504	2.53381	0.590432	0.173691	0.505366	0.0285837	7.40678	0.184611	5.54187	0.32653	35.678	1207.37	1.08586	1.62603	7.40678	0.768553	0.0776573	0.350871	8.43e-06	6	198	c
75	235	69	10.1857	4.83669	2.38427	17.6493	78.2089	116.65	39.2527	0.973681	-0.522625	0.034265	3.61934	0.569296	5.20166	0.498357	31.257	921.024	1.1267	1.63648	3.61934	0.659588	0.125898	0.444271	0.032761	7.94382	0.167035	5.7684	0.382956	31.3258	926	1.07903	1.66001	7.94382	0.803302	0.075704	0.349918	9.46e-06	9	966	c
76	45	22	3.36757	1.07583	1.53808	4.75799	69.3496	110.619	11.0058	0.865169	-0.204448	0.0317602	4.35	0.408719	4.67846	0.444062	31.0214	907.155	1.07495	1.57771	4.35	0.689846	0.109139	0.408051	0.1136	7.08	0.0509383	4.73	0.439692	30.6	898.658	0.753425	1.04292	7.08	0.684676	0.138487	0.379123	8.9e-06	7	966	c
77	83	31	4.84368	1.63208	2.14874	7.2981	45.7339	116.051	15.8775	0.892614	-0.348439	0.0286836	4.28986	0.465319	5.0116	0.431929	32.3768	990.058	1.09901	1.65714	4.28986	0.687782	0.0920833	0.384477	0.0382766	5.84615	-0.0517631	3.77922	0.345144	32.1923	981.301	0.950819	1.46276	5.84615	0.696985	0.0591151	0.291977	7.94e-06	8	407	c
78	109	40	6.11228	2.4678	2.23607	9.84886	522.55	118.245	21.8429	0.947657	-0.430073	0.0382351	3.79396	0.436753	4.36793	0.463871	32.2885	985.263	1.05409	1.56168	3.79396	0.66813	0.0766456	0.342098	0.0296124	8.3494	-0.0290637	5.05679	0.286823	32.6867	1010.18	1.02754	1.59589	8.3494	0.780846	0.0977322	0.3889	4.93e-06	4	147	c
79	194	60	7.39108	2.38058	1.76675	10.8745	31.8974	123.908	21.0144	0.58947	0.782621	0.0347836	2.88856	0.73624	6.47574	0.564393	33.1352	1040.16	1.1799	1.60896	2.88856	0.623234	0.200651	0.549103	0.0349779	4.71533	0.591253	6.76802	0.486867	32.6569	1011.68	1.13997	1.58394	4.71533	0.702148	0.157688	0.487334	7.51e-06	10	407	c
80	65	26	4.16821	1.18933	2.06155	5.85235	167.361	119.167	12.8037	0.837601	-0.225854	0.0947957	1.34434	0.40841	2.13621	0.62217	36.6085	1283.2	0.831413	1.14951	1.34434	0.482887	0.0868932	0.314887	0.0726573	3.44681	-0.117405	2.54233	0.467584	36.8511	1302.69	0.796019	1.22409	3.44681	0.632351	0.0452689	0.234775	9.91e-06	8	115	c
81	70	25	4.38419	0.877097	2.74401	5.71048	456.648	122.504	12.2881	0.780591	0.525071	0.0720864	3.13305	0.480429	4.01503	0.528794	33.4678	1063.66	0.9912	1.39876	3.13305	0.638508	0.10531	0.37948	0.0677438	5.35714	0.110295	4.01063	0.420047	33.0714	1041.76	0.898789	1.28074	5.35714	0.732317	0.0988475	0.353119	7.62e-06	7	76	c
82	360	66	10.4633	2.07956	6.06644	14.0027	434.346	131.613	27.2198	0.69857	0.741213	0.0328397	1.66793	0.834361	6.03481	0.60312	32.7451	1013.66	1.19843	1.58137	1.66793	0.525266	0.289235	0.643556	0.0269405	4.01923	0.599407	6.0166	0.472425	32.5641	1002.14	1.16196	1.69382	4.01923	0.683816	0.131604	0.460741	8.07e-06	7	400	c
83	113	36	5.70407	1.33066	3.32058	8.03974	125.808	124.221	16.0803	0.760034	-0.292482	0.0261651	4.05412	0.651557	6.81749	0.487336	30.7552	892.06	1.21122	1.74681	4.05412	0.684762	0.153236	0.501647	0.0178906	9.45	0.191876	6.84687	0.318392	30.25	860.842	1.14837	1.81034	9.45	0.800221	0.109043	0.434089	1.06e-05	13	137	c
84	213	70	9.72777	4.77197	1.47316	17.3567	292.505	125.915	39.3466	0.980316	-0.309412	0.0409435	2.96448	0.432672	3.61267	0.51853	34.1175	1101.91	1.0354	1.52521	2.96448	0.628272	0.0784552	0.342202	0.0324414	6.025	0.0750336	4.25687	0.408337	34.35	1117.47	1.02632	1.62424	6.025	0.751216	0.0388325	0.249594	8.24e-06	3	240	c
85	101	30	5.22553	0.618619	4.14461	6.38053	492.207	124.25	12.7738	0.555626	-0.1309	0.05103	1.70201	0.659544	3.49959	0.574549	35.6046	1204.57	1.01735	1.39865	1.70201	0.51967	0.16634	0.473412	0.047574	3.36232	0.329255	3.50641	0.425746	35.2754	1183.42	0.971502	1.41702	3.36232	0.606807	0.100453	0.37307	6.49e-06	9	142	c
86	144	44	6.63163	2.19288	3.27304	10.1258	323.64	126.536	21.7067	0.908241	-0.089632	0.0219638	3.78357	0.658737	6.54348	0.452634	32.1202	973.027	1.22304	1.76774	3.78357	0.666378	0.16219	0.517713	0.0190058	9.90351	0.189067	7.10624	0.298604	32.2895	983.404	1.16259	1.80613	9.90351	0.826221	0.0834429	0.38148	8.05e-06	5	189	c
87	110	40	5.77604	2.27702	2.45	9.1325	262.677	127.509	21.0097	0.936203	-0.0579304	0.0337872	3.50404	0.57416	5.11427	0.520071	32.938	1025.08	1.12406	1.61864	3.50404	0.651075	0.134992	0.457046	0.0393825	5.10145	0.281845	4.55177	0.437063	32.2319	983.832	1.01127	1.48747	5.10145	0.724245	0.105892	0.391436	8.49e-06	5	142	c
88	197	58	8.13707	3.12965	1.48336	13.3	352.748	131.139	27.3952	0.911251	-0.482986	0.0277578	3.53052	0.70069	6.89777	0.494579	31.4782	937.281	1.19255	1.71758	3.53052	0.65742	0.163409	0.513176	0.0218418	9.05195	0.273644	7.23107	0.322294	31.5325	937.724	1.17045	1.76767	9.05195	0.816673	0.0852602	0.381651	7.95e-06	8	267	c
89	194	48	7.37315	0.877414	5.04274	8.83247	8.28683	132.639	16.9199	0.44205	1.46509	0.0492727	1.48559	0.757286	4.06037	0.6371	35.1628	1171.14	1.09843	1.45505	1.48559	0.50348	0.239043	0.571264	0.0376117	3.23377	0.482168	4.12241	0.494582	35.1299	1172.03	1.03046	1.52322	3.23377	0.608021	0.123467	0.426181	6.34e-06	9	727	c
90	269	62	9.4754	3.42323	3.44516	14.7254	220.625	132.694	32.329	0.931847	0.380994	0.0485358	1.51242	0.773471	4.33826	0.634542	35.2205	1177.72	1.07556	1.43139	1.51242	0.51559	0.237637	0.565898	0.0348145	3.42723	0.531569	4.6582	0.514591	35.2394	1177.74	1.08482	1.55015	3.42723	0.652063	0.129489	0.439494	9.56e-06	9	378	c
91	70	26	4.32576	0.884239	2.84979	5.7216	152.705	129.432	12.0048	0.759896	0.100995	0.0565826	3.12931	0.452958	3.86021	0.519258	33.0862	1037.32	1.00803	1.45518	3.12931	0.633737	0.106255	0.38815	0.108566	5.56098	-0.215289	3.28792	0.418872	32.3415	1001.17	0.756948	1.08773	5.56098	0.678129	0.145802	0.396525	1.08e-05	12	766	c
92	149	44	6.62707	1.46755	4.0109	9.76757	166.376	133.121	18.3325	0.783716	-0.595274	0.0454152	3.45753	0.609232	5.42401	0.518161	30.8514	898.818	1.10948	1.54247	3.45753	0.653958	0.166828	0.494752	0.0469835	8.47273	0.177867	6.15289	0.412292	30.5455	882.665	1.04078	1.52916	8.47273	0.811447	0.0681635	0.319831	1.1e-05	12	766	c
93	439	102	13.3583	5.23663	4.81182	23.5317	399.371	138.861	44.0398	0.92882	0.252372	0.0354325	2.01325	0.829674	6.91	0.614078	34.3628	1121.62	1.19667	1.59256	2.01325	0.56328	0.269895	0.625757	0.0260301	5.42778	0.575277	7.38978	0.468661	34.3444	1119.84	1.18259	1.71001	5.42778	0.728456	0.131917	0.463204	8.25e-06	8	557	c
94	263	65	9.7326	3.67989	3.39857	16.3165	97.455	140.807	32.9204	0.943822	-0.325096	0.0332349	3.03305	0.569954	4.52642	0.528923	32.5682	1000.65	1.11068	1.61061	3.03305	0.626662	0.121932	0.434412	0.0261853	6.03756	0.252003	5.03582	0.401346	32.892	1021.6	1.08794	1.68022	6.03756	0.755112	0.0556246	0.302752	1.14e-05	11	312	c
95	73	30	4.71027	1.674	2.22361	7.23034	461.512	139.195	15.9996	0.922317	-0.429402	0.0432089	4.08017	0.40469	4.42693	0.438457	33.0338	1032.61	1.04959	1.52565	4.08017	0.677273	0.0872646	0.360492	0.0724826	9.60417	-0.282671	4.74382	0.377943	33.4375	1069.73	0.812982	1.23603	9.60417	0.794474	0.107268	0.361566	7.79e-06	10	134	c
96	59	24	4.13667	1.24683	2.23607	5.83095	71.0529	139.944	13.3394	0.892276	-0.62451	0.0457756	4.84737	0.365209	4.81808	0.44435	31.0368	909.306	1.0555	1.52911	4.84737	0.719615	0.0853214	0.356934	0.104082	8.91429	-0.129266	4.94694	0.353322	31.4286	944.3	0.811146	1.14658	8.91429	0.720834	0.106646	0.348097	1.05e-05	14	76	c
97	164	57	6.2957	2.24116	0.448313	10.5027	153.875	143.687	18.2045	0.637161	0.0278127	0.0463388	2.67986	0.456259	3.46427	0.549501	34.8129	1147.89	1.03854	1.51714	2.67986	0.609045	0.094751	0.374253	0.0362571	5.12174	-0.0235816	3.50187	0.412891	35.0348	1167.34	0.940054	1.52743	5.12174	0.718846	0.0470767	0.266447	1.2e-05	14	766	c
98	68	25	4.25459	0.738146	2.71912	5.42896	189.528	142.255	11.8415	0.75304	-1.28542	0.0305917	3.04867	0.596007	4.77318	0.46092	32.6062	1002.13	1.14055	1.62554	3.04867	0.611102	0.140236	0.466275	0.043905	6.61364	0.167896	4.97404	0.325632	32.3864	995.766	0.978032	1.44213	6.61364	0.723215	0.158137	0.468354	1.13e-05	14	116	c
99	67	24	4.24901	0.866879	2.3863	5.44926	19.8312	142.882	11.8645	0.786459	-1.07735	0.187434	0.59009	0.311791	1.42871	0.748198	38.9234	1467.25	0.633409	0.824021	0.59009	0.356385	0.068282	0.237887	0.234321	0.688889	0.149649	1.40506	0.708889	38.9556	1477.38	0.530941	0.730656	0.688889	0.365604	0.0663288	0.221112	7.79e-06	11	727	c
100	294	60	9.2503	1.5094	5.86546	11.8661	41.0713	148.777	22.4541	0.601535	-0.880153	0.0684067	1.08793	0.653027	2.56775	0.664695	36.7175	1284.05	0.956273	1.272	1.08793	0.454352	0.181082	0.473011	0.0543894	2.06751	0.367456	2.63428	0.556267	36.5907	1277.04	0.917553	1.36591	2.06751	0.557838	0.0726354	0.312778	9.59e-06	16	966	c
101	101	36	5.7412	2.17734	2.36127	9.35225	171.97	143.426	20.0359	0.93643	-0.487185	0.0528974	6.52522	0.324022	5.8265	0.435521	27.3027	701.647	1.05642	1.57813	6.52522	0.765085	0.0893528	0.370443	0.0649704	11.4	-0.147537	5.96716	0.417577	27.1538	697.527	0.903923	1.32107	11.4	0.784202	0.0843336	0.33137	1.17e-05	16	766	c
102	225	51	8.29968	1.93342	5.28823	11.7183	260.726	146.955	24.0354	0.842399	-0.336824	0.0437465	2.36375	0.739988	5.54546	0.575976	32.1591	977.296	1.15135	1.55586	2.36375	0.591789	0.224696	0.570561	0.0367754	6.42246	0.361509	6.0294	0.412	31.9947	967.729	1.10722	1.60071	6.42246	0.735586	0.106082	0.405166	9.52e-06	9	578	c
103	68	26	4.2454	0.829518	2.7351	5.56258	280.79	148.212	11.7434	0.757095	-0.524247	0.0983901	1.03556	0.419503	1.89196	0.668261	38.12	1395.3	0.800199	1.09835	1.03556	0.439836	0.102052	0.333776	0.105679	1.13333	0.192044	1.70136	0.62	38.2889	1414.08	0.706921	1.01792	1.13333	0.433728	0.0402346	0.202324	9.1e-06	5	94	c
104	192	56	8.22919	3.08196	3.64443	13.03	515.261	156.336	28.4816	0.944156	1.30146	0.0354965	2.5693	0.648931	4.65925	0.525112	32.7511	1013.12	1.11165	1.57551	2.5693	0.597942	0.158939	0.488025	0.0300973	5.80153	0.164611	4.47235	0.351032	32.0611	970.656	1.03579	1.60302	5.80153	0.720722	0.0601473	0.307613	5.29e-06	8	321	c
105	110	38	5.74889	2.02772	2.31055	9.02171	116.293	149.8	19.3459	0.919498	-0.319973	0.0715451	1.93566	0.400759	2.61509	0.59612	34.9062	1161.19	0.896345	1.28923	1.93566	0.558342	0.0730593	0.30518	0.0830192	2.49296	-0.0330881	2.20656	0.521044	34.4648	1137.26	0.77614	1.16115	2.49296	0.537612	0.0804139	0.304469	1.23e-05	14	349	c
106	91	37	5.35909	1.32088	3.10105	8.1337	381.746	150.579	14.6924	0.758738	0.555577	0.0217654	4.0473	0.695345	7.64243	0.436761	32.8041	1019.43	1.23019	1.74059	4.0473	0.675189	0.184626	0.546035	0.0243056	10.8667	0.281305	8.56	0.294653	32.6	1007.41	1.16703	1.71785	10.8667	0.851312	0.156195	0.502514	8.4e-06	8	547	c
107	82	29	4.7501	1.07404	2.72414	6.58946	489.949	150.916	13.7738	0.770049	-0.51192	0.0203306	5.8	0.592649	8.11917	0.399681	31.4509	936.509	1.22125	1.78864	5.8	0.748089	0.131314	0.471456	0.0323959	16.2075	0.0571485	9.59496	0.300682	30.5472	884.468	1.11426	1.63553	16.2075	0.885477	0.121077	0.435949	6.77e-06	10	209	c
108	54	24	3.80203	1.14918	1.5052	5.43283	206.893	151.094	12.1618	0.877953	0.353063	0.091705	1.39535	0.3399	2.05692	0.637209	36.9302	1306.1	0.829462	1.20008	1.39535	0.498968	0.0788258	0.306243	0.115434	3.10714	-0.0466165	2.48438	0.512815	36.75	1298.74	0.751251	0.998526	3.10714	0.551949	0.10989	0.331089	1.14e-05	12	201	c
109	181	48	7.54697	2.18528	4.11768	10.9866	471.985	155.166	23.8595	0.890623	-0.39395	0.0286099	4.05016	0.664763	7.04073	0.466776	30.0094	849.886	1.20362	1.7192	4.05016	0.681126	0.170683	0.523874	0.0359353	8.06977	0.265837	6.4959	0.363558	29.093	796.835	1.11229	1.65447	8.06977	0.805239	0.111711	0.42165	7.47e-06	12	210	c
110	180	49	7.3768	2.01414	3.69438	11.083	373.932	157.997	21.8554	0.800333	0.60113	0.0259167	2.84945	0.735952	6.39569	0.52543	32.4596	995.445	1.2072	1.69962	2.84945	0.620769	0.203863	0.565778	0.0193163	7.14685	0.392178	6.87906	0.361693	32.4196	992.552	1.17566	1.78797	7.14685	0.760812	0.128861	0.46721	8.4e-06	9	547	c
111	180	50	8.15711	3.11351	2.88922	13.1342	331.382	158.513	28.5015	0.950623	0.677511	0.0250327	3.14331	0.692148	6.10522	0.519358	32.3471	986.809	1.20983	1.71208	3.14331	0.635719	0.180375	0.536492	0.0221674	6.78519	0.368043	6.3684	0.390896	32.0889	971.088	1.16317	1.76249	6.78519	0.771061	0.116142	0.441959	8.58e-06	8	240	c
112	139	39	6.38198	1.32744	4.21177	8.76886	395.451	156.608	17.8885	0.801007	0.720032	0.0377695	3.10288	0.649587	5.42746	0.498901	32.428	992.985	1.14895	1.59088	3.10288	0.638242	0.173357	0.510524	0.0210616	7.7027	0.203446	5.83502	0.335472	32.4955	996.434	1.11403	1.74149	7.7027	0.792135	0.0760204	0.358567	8.42e-06	9	547	c
113	60	24	3.92937	0.814996	2.30489	5.03115	86.5443	154.649	10.9534	0.744896	-0.312753	0.0647517	1.64796	0.397798	2.36828	0.57398	35.7398	1218.3	0.890471	1.27936	1.64796	0.511735	0.0765596	0.311178	0.0623583	3.30952	-0.0776188	2.53557	0.448535	35.6905	1218.6	0.822615	1.25906	3.30952	0.60861	0.0273783	0.185326	1.19e-05	13	101	c
114	266	75	10.4455	4.95253	2.13021	18.7209	289.167	157.839	41.5955	0.974858	-0.256807	0.0282442	2.83726	0.701979	5.76016	0.541153	34.0064	1094.22	1.17331	1.65455	2.83726	0.612719	0.181745	0.530683	0.0256225	5.08416	0.449329	5.61633	0.439053	34.005	1094.86	1.11912	1.67144	5.08416	0.728717	0.107187	0.415288	9.28e-06	7	359	c
115	68	26	4.24321	0.785131	2.80004	5.47669	18.24	156.691	11.2271	0.666005	-0.360026	0.06533	1.48214	0.485093	2.43923	0.610609	37.5446	1345.87	0.916845	1.28594	1.48214	0.49702	0.122075	0.392375	0.0738636	3.04545	0.105311	2.70196	0.459091	37.6818	1358.81	0.870793	1.1967	3.04545	0.592983	0.0821956	0.312239	8.25e-06	12	727	c
116	42	19	3.24335	0.573006	2.0634	4.0581	425.362	155.68	8.98392	0.723102	-0.618796	0.0473772	3.68182	0.404002	4.08879	0.444611	33.803	1084.65	1.00099	1.44705	3.68182	0.652516	0.0983548	0.372855	0.0754438	6.69231	-0.0745843	4.11391	0.4316	34.0769	1109.19	0.85904	1.27634	6.69231	0.763537	0.0958454	0.347241	8.35e-06	11	76	c
117	279	59	9.2288	1.91239	6.22209	13.2077	173.657	161.329	24.6567	0.74666	0.176829	0.0289525	2.63304	0.770261	6.73049	0.551827	31.3096	926.058	1.2136	1.67581	2.63304	0.603671	0.229268	0.593345	0.0204348	6.39565	0.450386	6.81831	0.384879	31.2391	919.741	1.19145	1.79095	6.39565	0.758451	0.0918739	0.39801	1.27e-05	17	364	c
118	130	42	6.66259	2.58208	2.43289	10.9181	96.4619	160.553	23.6431	0.944632	-0.472908	0.0373505	5.88488	0.458386	6.43272	0.451034	28.9774	790.215	1.14994	1.71321	5.88488	0.746444	0.0901499	0.386438	0.0308042	9.59551	0.108915	6.38417	0.322065	28.6292	770.674	1.08411	1.66338	9.59551	0.819392	0.111734	0.422717	1.24e-05	15	349	c
119	120	36	5.74826	1.08582	3.36249	7.50375	258.748	161.484	15.3498	0.736675	0.407709	0.0550747	2.07933	0.423813	2.80439	0.559736	37.2476	1323.11	0.943672	1.39537	2.07933	0.562054	0.0685383	0.307057	0.0647645	4.43158	-0.0415229	3.12745	0.480021	37.4421	1340.98	0.878486	1.29802	4.43158	0.684002	0.0322029	0.203947	1.03e-05	11	578	c
120	282	76	9.84302	3.46381	2.50498	16.2274	138.891	165.837	31.4456	0.884327	0.0808424	0.0452182	1.65431	0.727403	4.03435	0.613171	33.2776	1045.2	1.11054	1.50556	1.65431	0.528049	0.214964	0.551494	0.0333853	3.66667	0.41978	4.15972	0.465676	33.1667	1038.93	1.07377	1.60425	3.66667	0.656029	0.0963186	0.387099	1.3e-05	18	667	c
121	526	96	13.6823	4.92048	6.52882	22.1679	218.126	167.897	45.8207	0.933189	-0.125496	0.0409965	1.54742	0.813411	5.14662	0.642328	31.766	951.651	1.16186	1.52273	1.54742	0.513335	0.291989	0.637067	0.0335462	3.36239	0.590232	5.10279	0.532549	31.3853	928.919	1.12198	1.60726	3.36239	0.651085	0.172577	0.511686	1.18e-05	16	876	c
122	231	53	8.43604	2.15611	5.04466	12.5087	41.6476	168.298	24.6179	0.841284	-0.51724	0.0449064	2.59518	0.709357	5.46454	0.547781	30.9036	902.228	1.12166	1.55483	2.59518	0.609192	0.200185	0.540738	0.0405798	4.94318	0.364832	4.89124	0.442764	30.3068	865.79	1.06357	1.57737	4.94318	0.722718	0.0782549	0.347209	1.01e-05	17	1635	c
123	51	29	3.73243	1.27819	1.69808	5.89746	194.352	166.086	10.9221	0.754307	0.0192962	0.110017	1.29139	0.226851	1.83515	0.656291	38.1921	1404.62	0.741147	1.05592	1.29139	0.488976	0.0484513	0.226009	0.289931	1.08333	-0.2	1.45139	0.708333	38.1667	1417.67	0.524297	0.720088	1.08333	0.457694	0.095498	0.263949	1.24e-05	16	876	c
124	110	32	5.55398	0.912134	3.59375	7.11794	478.056	168.158	14.9769	0.71535	0.442682	0.0397007	5.08136	0.572907	6.94878	0.458478	27.4068	708.32	1.14648	1.64099	5.08136	0.724013	0.160521	0.499037	0.0551194	10.8101	0.155577	7.4009	0.398596	26.9367	686.154	1.02608	1.43065	10.8101	0.831116	0.0760864	0.327093	6.69e-06	9	140	c
125	139	38	6.39048	1.35511	4.02089	8.75149	504.037	172.189	17.8283	0.807468	-1.02948	0.0501647	1.61396	0.618758	3.11672	0.574659	33.8152	1083.03	1.01004	1.40416	1.61396	0.505653	0.156624	0.460738	0.0523967	3.27273	0.25901	3.20835	0.456125	33.9455	1093.72	0.958213	1.42368	3.27273	0.631214	0.0666343	0.305735	5.21e-06	7	194	c
126	52	21	3.61891	0.364006	2.51841	4.14723	24.2729	169.526	8.83941	0.440433	0.660544	0.0290606	3.60355	0.482451	4.48136	0.453552	32.3491	987.679	1.0864	1.6102	3.60355	0.654536	0.109295	0.412139	0.0470679	7.88889	0.0526316	5.16358	0.366538	33.1111	1042.5	0.959393	1.39254	7.88889	0.769503	0.0644468	0.297596	8.77e-06	13	77	c
127	124	41	6.0641	2.21457	2.03158	9.39151	107.561	170.107	20.4939	0.903244	-0.156457	0.0435424	5.33333	0.601389	7.6899	0.472303	28.4681	766.332	1.17513	1.67886	5.33333	0.741474	0.128895	0.454424	0.0382231	11.6023	0.0730391	7.25823	0.331594	28.2841	753.072	1.08774	1.62078	11.6023	0.850553	0.131039	0.450888	1.26e-05	16	173	c
128	251	62	9.72994	3.89386	2.792	16.2586	51.6243	176.963	33.3631	0.948547	-0.476776	0.0419059	2.39013	0.657805	4.49236	0.582807	32.7511	1013.35	1.1004	1.54734	2.39013	0.587404	0.183695	0.518402	0.0385536	4.57949	0.360631	4.58126	0.491119	32.6103	1005.91	1.04811	1.57238	4.57949	0.710208	0.100398	0.391318	1.03e-05	16	1635	c
129	70	34	4.35647	1.26211	1.89084	6.356	156.867	171.257	12.2475	0.699268	-0.0291312	0.0279498	4.28311	0.626864	6.73933	0.453137	32.4292	995.959	1.16768	1.65545	4.28311	0.692963	0.154007	0.491278	0.0420525	10.6667	0.190917	7.59182	0.339073	31.7222	954.477	1.08277	1.4558	10.6667	0.796347	0.134415	0.435014	1.29e-05	19	667	c
130	147	40	6.41968	1.14354	3.96611	8.09506	344.715	176.714	16.9372	0.7064	-1.21922	0.0245764	2.88395	0.657108	5.20533	0.482007	32.9729	1025.47	1.16832	1.68818	2.88395	0.611418	0.151232	0.491256	0.0267024	6.93694	0.241507	5.57284	0.326064	32.6126	1003.56	1.11332	1.66914	6.93694	0.764102	0.0822112	0.365153	8.53e-06	10	219	c
131	131	43	7.06571	3.03861	2.10333	11.7505	195.067	176.908	25.8821	0.962754	0.622818	0.0606474	1.91648	0.464921	2.79084	0.578496	34.4266	1125.37	0.95839	1.35318	1.91648	0.553613	0.097599	0.360051	0.0594131	3.57143	-0.0699105	2.66903	0.462319	34.4505	1133.53	0.828797	1.34316	3.57143	0.635914	0.0793413	0.32409	1.25e-05	15	876	c
132	41	19	3.15878	0.49368	2.33722	3.91212	9.5552	173.574	8.59505	0.694823	0.24771	0.0267412	3.11628	0.696339	6.13118	0.477155	30.8992	900.338	1.18509	1.65281	3.11628	0.623665	0.199153	0.553349	0.0299587	5.77273	0.335632	5.34452	0.308042	31.5909	944.469	1.0481	1.54767	5.77273	0.61558	0.225706	0.570509	7.39e-06	11	75	c
133	76	30	4.64652	1.58249	1.71432	7.03365	138.357	175.228	15.1682	0.898844	-0.316163	0.053486	1.98367	0.418041	2.70431	0.563649	35.7306	1216.72	0.918439	1.31557	1.98367	0.550529	0.073528	0.309104	0.0558432	3.13462	-0.0252192	2.52875	0.41957	36.4808	1273.96	0.830023	1.30763	3.13462	0.57428	0.0492164	0.252687	1.28e-05	17	667	c
134	112	36	5.53146	1.24792	3.45786	7.62752	379.755	175.673	15.8796	0.788313	-0.353139	0.0442641	1.75521	0.7148	4.07715	0.5803	35.4375	1192.7	1.05508	1.44496	1.75521	0.530092	0.218319	0.546083	0.0462266	3.59494	0.39444	3.96827	0.48776	35.1139	1171.64	1.00577	1.40518	3.59494	0.652875	0.0953302	0.362237	8e-06	10	367	c
135	364	68	10.6592	2.31193	5.3667	15.2896	448.03	181.967	28.3309	0.721724	1.12407	0.0522336	1.94906	0.763434	5.1195	0.595928	30.0375	850.592	1.1227	1.50347	1.94906	0.55755	0.237051	0.576689	0.045305	4.63934	0.430628	5.07409	0.455051	29.7738	835.938	1.06348	1.55341	4.63934	0.699926	0.124349	0.431444	6.46e-06	8	506	c
136	141	39	6.38802	1.51928	3.18052	9.05894	277.183	177.72	18.1725	0.814429	-0.358858	0.0471242	1.88057	0.534139	3.01838	0.568409	33.8927	1088.21	0.998672	1.42875	1.88057	0.540409	0.114228	0.398668	0.040168	3.78448	0.132935	3.18235	0.399926	34.2845	1116.27	0.947895	1.4961	3.78448	0.631459	0.042678	0.251317	1.03e-05	8	2086	c
137	78	28	4.6218	1.06482	2.77838	6.42579	70.1858	177.568	13.3573	0.801355	-0.411649	0.0400296	2.61923	0.532082	3.79881	0.502275	31.6115	942.868	1.04535	1.52143	2.61923	0.591815	0.115761	0.412928	0.0420992	4.54902	0.00987448	3.29719	0.410452	31.2157	922.992	0.911353	1.45064	4.54902	0.674146	0.0910906	0.359567	1.12e-05	15	116	c
138	143	38	6.33632	0.934484	4.48142	8.34323	239.096	180.393	16.3117	0.678595	0.0871911	0.0517743	1.93056	0.647789	3.74062	0.585142	31.8671	958.584	1.05225	1.42891	1.93056	0.549718	0.198439	0.519667	0.0527768	3.26415	0.27945	3.26504	0.479356	31.3585	930.594	0.947992	1.3926	3.26415	0.629702	0.0714267	0.313067	1.14e-05	14	228	c
139	77	32	4.97621	1.99267	1.78125	7.95599	83.881	181.244	17.9317	0.942981	-0.490267	0.0467331	4.98394	0.303162	4.57611	0.464878	30.0281	850.153	1.031	1.53109	4.98394	0.72118	0.0573313	0.293951	0.0384	9.58	-0.166159	5.1075	0.343022	30.3	868.168	0.951777	1.49712	9.58	0.76261	0.151732	0.466829	1.13e-05	14	120	c
140	175	49	7.33308	2.32352	3.07236	11.0754	170.644	183.025	23.6281	0.881775	0.175695	0.0398037	2.7814	0.676204	5.29499	0.543028	29.8254	837.296	1.13927	1.57804	2.7814	0.615292	0.194929	0.537416	0.0353501	6.11511	0.340821	5.63842	0.421513	29.9137	842.397	1.10466	1.62187	6.11511	0.745314	0.0932065	0.382918	1.25e-05	19	269	c
141	158	40	6.6991	1.05071	4.76898	8.60483	477.358	184.154	16.6409	0.591053	-0.134866	0.0420823	2.69286	0.611024	4.46147	0.558747	29.8643	838.091	1.10775	1.53546	2.69286	0.618129	0.16559	0.492039	0.0331035	5.87097	0.238635	4.85555	0.440689	29.6935	829.74	1.05462	1.5926	5.87097	0.744223	0.060462	0.307446	5.29e-06	8	206	c
142	184	47	7.86126	2.42564	3.0628	11.9493	132.614	191.855	24.7372	0.902911	-0.641775	0.0378503	2.94907	0.702928	5.96356	0.542306	30.2238	862.353	1.14717	1.62076	2.94907	0.620137	0.179389	0.522887	0.0283939	5.76596	0.380766	5.65571	0.411445	29.9645	845.35	1.11158	1.70105	5.76596	0.740643	0.0881369	0.380994	1.14e-05	14	758	c
143	195	57	8.75684	3.59547	2.23311	14.931	215.929	191.885	31.5479	0.953555	-0.54884	0.0285046	3.42541	0.638934	5.74346	0.507371	30.4623	873.614	1.16958	1.68873	3.42541	0.647137	0.15936	0.503529	0.0292933	7.95918	0.232688	6.1864	0.378542	30.3537	867.415	1.1197	1.70993	7.95918	0.812661	0.0640237	0.32701	1.15e-05	13	2086	c
144	176	45	7.45805	2.11173	4.05054	10.8272	331.47	192.431	23.1848	0.889549	0.718462	0.038708	1.86334	0.776884	5.17573	0.585702	32.3778	990.548	1.14147	1.53431	1.86334	0.544417	0.242687	0.587734	0.0285958	4.07914	0.516658	5.21972	0.407307	32.2374	982.567	1.09632	1.62032	4.07914	0.647461	0.138795	0.463335	8.45e-06	8	227	c
145	240	56	8.45437	2.05289	4.55389	11.3918	54.1077	195.699	23.8993	0.785898	1.39388	0.0472818	2.06257	0.703187	4.47453	0.590742	30.679	885.718	1.11752	1.51438	2.06257	0.566968	0.214567	0.552358	0.0400068	3.71277	0.411171	4.15267	0.501107	30.4681	875.851	1.02402	1.52312	3.71277	0.659824	0.123862	0.426825	8.17e-06	11	1635	c
146	68	24	4.3337	0.845899	2.64641	5.56059	25.3756	192.418	11.8844	0.777427	-0.768007	0.0413991	2.5	0.463112	3.32823	0.50146	33.9248	1090.12	1.01111	1.4897	2.5	0.568296	0.0987271	0.378599	0.0474802	3.26531	0.196392	3.03165	0.417527	34.5306	1133.43	0.936373	1.40347	3.26531	0.595456	0.118355	0.402304	6.94e-06	12	94	c
147	99	36	5.31503	1.82818	2.41347	7.86288	255.305	192.591	17.7461	0.903217	-0.0499084	0.057321	1.92216	0.385699	2.56451	0.541071	34.5629	1136.28	0.918532	1.33994	1.92216	0.535483	0.0630495	0.289026	0.0428481	3.97101	0.0534695	3.09767	0.410912	34.4348	1128.62	0.90564	1.43011	3.97101	0.646736	0.0578196	0.285702	1.06e-05	10	2086	c
148	296	62	9.35169	2.36405	4.49792	13.1568	283.768	196.448	27.5135	0.841334	-0.335499	0.0391515	1.74188	0.810849	5.60445	0.627753	31.9963	966.736	1.17324	1.55853	1.74188	0.533251	0.278429	0.629257	0.028317	4.32271	0.563	5.94589	0.494504	32.0359	968.662	1.16189	1.67805	4.32271	0.679468	0.161213	0.504879	9.58e-06	6	2086	c
149	209	51	7.82595	1.98811	3.90551	11.3041	395.989	199.021	23.4116	0.833628	-1.52726	0.0256286	2.83624	0.786876	7.65398	0.512701	30.9866	908.766	1.23785	1.70083	2.83624	0.617665	0.234918	0.603416	0.0288015	8.10759	0.408161	7.84949	0.372794	30.3987	873.587	1.17038	1.66642	8.10759	0.806846	0.149686	0.486138	6.11e-06	7	319	c
150	86	34	5.10256	1.86021	2.16331	7.92449	309.586	194.47	17.7748	0.928003	0.296068	0.0254414	5.70423	0.41291	5.85805	0.381313	31.2465	919.932	1.14326	1.70093	5.70423	0.729447	0.0865009	0.377547	0.0277008	10.3684	-0.0669053	5.85911	0.299831	31.1404	915.006	1.04154	1.66459	10.3684	0.822688	0.114375	0.427613	8.98e-06	9	119	c
151	134	42	6.54891	2.21443	2.48681	10.033	145.214	199.104	21.5217	0.907006	-0.51156	0.0302535	3.37527	0.599639	5.21529	0.491382	30.9067	900.14	1.12998	1.64954	3.37527	0.6504	0.13974	0.46851	0.0373407	5.68421	0.128707	4.26194	0.42008	30.6526	885.947	1.01172	1.54464	5.68421	0.734791	0.0752196	0.337231	1.06e-05	13	421	c
152	82	29	4.73494	1.01421	3.0738	6.50994	425.778	199.507	13.4766	0.789237	1.3618	0.0357265	3.44928	0.685871	6.49022	0.509763	32.3551	991.211	1.16694	1.61361	3.44928	0.656928	0.171524	0.511083	0.039239	9.24138	0.134377	6.33799	0.320628	32.3103	987.368	1.08124	1.48967	9.24138	0.814298	0.071268	0.322871	5.26e-06	5	298	c
153	66	24	4.20089	0.738393	3.04395	5.43283	35.1007	199.845	11.6945	0.755269	-0.371919	0.0319009	3.61644	0.531085	4.85617	0.471727	30.6119	881.415	1.12278	1.60456	3.61644	0.655135	0.156988	0.489056	0.0293628	8.57143	0.0918719	5.71928	0.312824	30.9796	904.356	1.07892	1.60183	8.57143	0.78853	0.0859867	0.366123	6.43e-06	10	1635	c
154	269	78	8.67191	3.53546	0.205128	15.4635	117.295	208.038	29.7403	0.850303	-0.897508	0.0393883	2.34505	0.657857	4.427	0.571518	32.6262	1005.12	1.10236	1.5316	2.34505	0.586346	0.173591	0.502583	0.0367162	4.22613	0.403904	4.54484	0.478448	32.4271	994.251	1.05362	1.58074	4.22613	0.695905	0.0921802	0.376376	8.38e-06	11	758	c
155	132	45	6.80565	2.83961	2.37528	11.0221	155.197	203.307	25.5502	0.957195	-0.511683	0.0234299	4.2953	0.605683	6.44651	0.434272	30.962	904.035	1.18707	1.72677	4.2953	0.688215	0.129503	0.461158	0.0229492	10.8854	0.0938611	7.00648	0.278086	30.7604	892.134	1.1126	1.71486	10.8854	0.852462	0.0925632	0.391565	1.01e-05	14	421	c
156	143	44	6.46291	2.31347	2.07616	10.1283	73.1716	203.485	21.2564	0.893505	0.237554	0.0278583	2.46138	0.694876	5.03341	0.533286	33.3557	1050.95	1.14896	1.6239	2.46138	0.587961	0.17933	0.523237	0.0243176	5.09804	0.427967	5.45607	0.399237	33.1961	1042.17	1.11106	1.67653	5.09804	0.702109	0.137659	0.468531	7.66e-06	11	1635	c
157	85	39	4.74304	1.65794	0.564685	7.61482	199.751	205.03	14.7784	0.810054	-0.158768	0.0470919	1.9037	0.596699	3.36015	0.557027	34.6296	1137.37	1.0166	1.42328	1.9037	0.540424	0.154041	0.459819	0.045124	4.12727	0.195787	3.56603	0.448235	34.5636	1135.48	0.957884	1.42418	4.12727	0.665088	0.142662	0.443287	9.9e-06	12	2086	c
158	87	32	4.81062	0.825309	3.08553	6.56376	243.017	203.967	11.719	0.489691	0.871241	0.0585375	1.5	0.611116	2.92859	0.617789	35.2103	1176.79	0.996675	1.36491	1.5	0.505983	0.150336	0.446075	0.0601389	3.75	0.11969	3.12993	0.459372	34.8833	1158.04	0.923548	1.37435	3.75	0.634241	0.113086	0.38972	9.5e-06	10	2086	c
159	146	40	6.50636	1.33946	3.93677	8.8458	353.356	205.839	17.1109	0.673544	0.444096	0.0268592	2.65166	0.764001	6.61795	0.535343	30.8474	897.761	1.2173	1.68412	2.65166	0.595347	0.227898	0.592914	0.0200733	6.23729	0.495087	7.1766	0.377273	31.2373	921.646	1.18438	1.75578	6.23729	0.747561	0.130338	0.465981	6.41e-06	7	353	c
160	125	41	6.08773	2.10341	2.20378	9.27246	217.842	203.779	20.5535	0.909382	-0.0852702	0.029469	2.96037	0.678569	5.605	0.543992	31.4499	933.506	1.1506	1.6439	2.96037	0.62863	0.177636	0.52364	0.0325964	4.0119	0.5128	5.11731	0.477358	30.9167	901.887	1.09336	1.57256	4.0119	0.660344	0.199541	0.542495	9.93e-06	11	2086	c
161	73	26	4.42068	0.676474	3.33974	5.69075	252.61	204.617	11.4712	0.663584	-0.62379	0.0382818	2.30041	0.623113	4.05186	0.538069	31.716	948.58	1.07828	1.51612	2.30041	0.56813	0.158561	0.479368	0.0390625	4.54167	0.13133	3.61415	0.388669	31.4583	936.58	0.951528	1.44986	4.54167	0.675448	0.0735012	0.323624	9.2e-06	8	2086	c
162	101	33	5.19244	0.843613	3.41027	6.32165	416.499	205.315	13.6983	0.673663	-1.30822	0.041467	2.88473	0.705487	5.89745	0.526609	30.5159	879.608	1.14064	1.59424	2.88473	0.620769	0.189455	0.532626	0.0431111	6.02667	0.282266	5.1984	0.44411	30.08	855.046	1.02352	1.52921	6.02667	0.753083	0.132074	0.440982	4.81e-06	5	298	c
163	104	33	5.35253	1.04649	3.76356	7.1783	317.83	206.969	14.9118	0.775817	1.0354	0.0253239	3.11204	0.790551	8.42913	0.516104	29.7563	839.605	1.24315	1.71489	3.11204	0.632111	0.231455	0.601372	0.0322978	6.80769	0.557866	8.69868	0.413657	29.6795	833.621	1.22542	1.63978	6.80769	0.769119	0.218564	0.575557	7.23e-06	7	126	c
164	62	25	4.0683	0.934307	2.17624	5.48234	298.219	206.342	11.7436	0.801554	0.708099	0.058058	1.74752	0.413088	2.48874	0.54802	35.8762	1226.33	0.917373	1.3364	1.74752	0.511136	0.087951	0.340128	0.0927684	3.10811	0.0943918	2.71603	0.512401	35.973	1236.45	0.863261	1.23948	3.10811	0.622524	0.112092	0.369954	7.85e-06	6	2086	c
165	120	35	5.77407	0.909217	4.13408	7.55205	177.564	214.415	15.4354	0.706017	-0.668122	0.0373303	4.30144	0.592325	6.27557	0.476749	27.5646	714.718	1.14648	1.63658	4.30144	0.6939	0.150281	0.483225	0.0332872	6.38824	0.193947	4.96266	0.377122	26.7412	669.682	1.04644	1.58199	6.38824	0.747293	0.0884307	0.368999	8.01e-06	11	176	c
166	78	30	4.63522	1.35658	1.81873	6.5758	129.756	217.769	14.3343	0.855785	-0.567995	0.0544589	1.52713	0.529097	2.62149	0.575969	35.8992	1227.93	0.928259	1.29379	1.52713	0.492441	0.114138	0.380737	0.0669277	2.58491	0.0137861	2.31052	0.477358	36.0566	1244.45	0.817458	1.23058	2.58491	0.566058	0.0382056	0.216333	6.65e-06	8	758	c
167	47	21	3.41654	0.646505	2.34109	4.39748	160.389	215.455	9.67772	0.737196	0.159805	0.0608222	4.92	0.519214	6.11662	0.478563	28.3467	759.497	1.0712	1.45903	4.92	0.72159	0.128892	0.426728	0.0499405	7.89655	-0.275031	4.09661	0.347206	28.3103	757.491	0.869479	1.3599	7.89655	0.788777	0.137561	0.426609	7.7e-06	11	114	c
168	48	20	3.46599	0.294777	2.91548	3.80789	766.458	35.5464	7.9454	0.209692	-0.574649	0.0492495	2.67532	0.320278	2.96795	0.502027	35.2987	1185.22	0.9473	1.41758	2.67532	0.591742	0.068518	0.309327	0.0689655	5.68966	-0.221131	3.32967	0.360446	35.4828	1205.46	0.815301	1.21966	5.68966	0.674391	0.113735	0.369834	1.13e-06	10	391	c
169	56	22	3.78846	0.564841	2.31818	4.6232	774.481	30.9691	9.67682	0.620444	1.13535	0.0491505	3.36612	0.374435	3.69047	0.487358	33.0929	1035.5	1.02884	1.5043	3.36612	0.646785	0.0815466	0.346476	0.0664037	5.69231	-0.095672	3.59763	0.370066	33.3846	1059.5	0.906961	1.28899	5.69231	0.7241	0.076132	0.311425	1.1e-06	12	391	c
170	497	91	12.1922	2.44533	7.01623	17.0157	755.358	119.789	30.3851	0.615305	-0.783189	0.0289468	2.7425	0.720344	5.90333	0.550069	29.9613	843.338	1.21292	1.70314	2.7425	0.613486	0.191856	0.550745	0.0260333	6.02174	0.381022	5.86426	0.424326	29.872	837.842	1.1595	1.78089	6.02174	0.75628	0.079266	0.369726	1.65e-06	11	1289	c
171	131	39	6.03534	1.34683	2.96417	7.70891	779.525	105.47	17.1557	0.775097	-1.3517	0.0240551	4.43736	0.818708	13.2382	0.479927	28.033	758.919	1.30464	1.80928	4.43736	0.699517	0.25294	0.638586	0.0276336	9.53922	0.627608	13.808	0.381409	28.2059	767.212	1.27041	1.73429	9.53922	0.841153	0.222924	0.593977	1.66e-06	14	1289	c
172	255	53	8.63071	1.98947	4.6486	11.8563	803.115	109.589	24.1767	0.808922	-0.154692	0.0560023	1.48108	0.660943	3.18412	0.61091	33.4962	1061.27	1.03056	1.4105	1.48108	0.501577	0.172823	0.483934	0.0476377	2.79397	0.33607	3.10411	0.529503	33.0251	1032.57	0.979163	1.48677	2.79397	0.618692	0.0679496	0.315112	1.7e-06	15	1039	c
173	94	29	5.07526	0.719459	3.73705	6.38155	820.208	115.504	13.7917	0.704443	0.184638	0.0210206	5.12733	0.736509	10.7296	0.421818	29.6739	840.579	1.2699	1.82246	5.12733	0.720413	0.184475	0.55634	0.0186982	14.0923	0.274327	10.7098	0.25846	29.2615	811.533	1.21182	1.7927	14.0923	0.874059	0.201454	0.575109	1.69e-06	17	1039	c
174	109	35	5.51908	1.46975	3.24383	7.88722	829.047	101.982	17.028	0.85641	-0.10527	0.0261124	4.38503	0.622332	6.80541	0.457324	28.7861	779.1	1.21322	1.75302	4.38503	0.697885	0.14419	0.48832	0.0250657	8.71795	0.26122	6.90023	0.34872	28.7436	776.622	1.14398	1.6909	8.71795	0.82635	0.115852	0.433294	1.61e-06	21	1039	c
175	76	27	4.49364	0.924789	2.79354	5.97434	817.324	91.9629	13.1226	0.761573	-0.136369	0.0234679	7.40784	0.519699	8.71167	0.39138	24.6863	574.659	1.20819	1.79348	7.40784	0.795924	0.123201	0.458035	0.024963	14.6538	0.0261502	8.52367	0.237407	24.4615	560.351	1.11824	1.69442	14.6538	0.869195	0.19001	0.547133	1.6e-06	18	1039	c
176	51	21	3.58181	0.393381	2.848	4.21637	834.633	91.0619	8.72358	0.343811	0.843512	0.0388797	6.61818	0.340937	6.0209	0.431992	29.2606	807.555	1.08102	1.63481	6.61818	0.765373	0.0826439	0.362561	0.0564804	6.93103	0.0608233	4.68995	0.355281	28.5862	771.977	0.942975	1.34952	6.93103	0.696773	0.214827	0.526621	1.53e-06	17	1039	c
177	50	20	3.64092	0.65665	2.3585	4.58939	847.974	92.7868	10.1855	0.760154	0.633104	0.0314803	4.11801	0.573609	5.82891	0.454045	31.646	945.996	1.13697	1.62001	4.11801	0.670431	0.158955	0.493985	0.0428994	6.46154	0.180488	4.94231	0.355099	31	908.466	1.01403	1.42065	6.46154	0.733363	0.215336	0.538739	1.46e-06	17	1241	c
178	188	47	7.2942	1.17376	4.9392	9.38151	854.6	83.8997	18.3084	0.617241	0.681303	0.0343762	3.09581	0.570185	4.60133	0.510494	29.2485	802.958	1.11226	1.62269	3.09581	0.633994	0.115721	0.425095	0.0309197	6.59603	0.0869819	4.61221	0.387147	29.3377	809.78	1.01943	1.61642	6.59603	0.76559	0.0480187	0.276491	1.36e-06	16	1241	c
179	143	44	6.30689	1.57031	2.89717	8.95864	867.94	77.3128	16.761	0.660796	-0.488418	0.0296525	2.40771	0.64511	4.39219	0.526986	33.5761	1064.52	1.1206	1.59113	2.40771	0.582693	0.1503	0.477338	0.0284155	4.61616	0.308111	4.33591	0.377481	33.5859	1066.03	1.06969	1.60385	4.61616	0.667756	0.0837983	0.361778	1.21e-06	12	1241	c
180	61	26	4.02902	1.28514	0.707107	5.70088	895.504	89.587	12.6947	0.848988	-0.0241314	0.17169	0.671795	0.230352	1.43643	0.713333	37.8308	1385.89	0.617708	0.837463	0.671795	0.362306	0.0445339	0.193459	0.174885	0.846154	-0.000388651	1.42291	0.669231	38.0256	1403.69	0.571019	0.839853	0.846154	0.390056	0.0152086	0.113086	9.84e-07	7	1241	c
181	115	35	5.64611	1.24173	2.91932	7.42445	732.072	144.077	16.7755	0.795042	-0.126164	0.0314891	5.35176	0.731095	10.951	0.447111	27.9296	746.255	1.25003	1.77824	5.35176	0.739309	0.206493	0.579653	0.0197572	12.6591	0.361297	10.91	0.280089	27.7955	731.47	1.25325	1.80661	12.6591	0.885897	0.131366	0.473622	1.66e-06	12	1289	c
182	135	46	6.16046	1.946	1.02197	8.94432	728.643	131.001	17.8786	0.708033	-0.696772	0.024974	3.51957	0.610344	5.51625	0.473054	32.4848	995.839	1.15917	1.68262	3.51957	0.65286	0.135196	0.46529	0.0309546	7.88043	0.271353	6.40758	0.354673	32.5109	1000.38	1.10012	1.56024	7.88043	0.776095	0.0933739	0.376452	1.6e-06	12	1289	c
183	664	102	14.3731	3.66065	6.55616	19.638	577.884	341.096	40.7781	0.832609	-1.28574	0.0299153	2.4196	0.661926	4.57852	0.547488	33.1883	1039.05	1.13903	1.62544	2.4196	0.587608	0.153001	0.485883	0.0250932	4.38382	0.380196	4.53646	0.43675	33.3167	1047.7	1.09961	1.68258	4.38382	0.690254	0.0605323	0.315756	1.76e-06	14	1342	c
184	287	57	9.29284	2.1497	5.51592	13.3221	613.559	278.286	26.5002	0.826087	1.44037	0.0292887	3.01051	0.652429	5.33078	0.527929	31.3295	923.97	1.16899	1.67681	3.01051	0.633409	0.160522	0.503706	0.0224085	6.2735	0.304494	5.51003	0.374236	31.0513	907.513	1.12227	1.74002	6.2735	0.753414	0.0907046	0.390362	1.68e-06	10	1476	c
185	198	53	8.53998	3.39267	3.43842	13.9505	369.375	278.607	30.3581	0.955089	-0.568129	0.0261058	5.25072	0.548993	6.82111	0.456852	29.4063	813.588	1.20077	1.79547	5.25072	0.730385	0.109383	0.433122	0.0237088	9.35294	0.223828	7.02504	0.363253	29.3399	810.354	1.13337	1.75425	9.35294	0.819869	0.0856868	0.381227	1.14e-06	7	315	c
186	148	39	6.47938	1.02204	4.71753	8.74415	394.623	276.61	16.941	0.679104	1.40111	0.0208259	3.97323	0.695889	7.53254	0.448098	30.4054	872.476	1.24513	1.80073	3.97323	0.67159	0.176981	0.54319	0.0268496	9.86239	0.301492	8.05961	0.35099	29.9908	849.478	1.16199	1.7394	9.86239	0.845144	0.11546	0.438125	1.24e-06	9	443	c
187	151	44	6.43287	2.04353	1.01639	9.39228	408.113	281.93	19.8486	0.833669	1.18876	0.0323317	3.15458	0.534107	4.38552	0.497879	33.3149	1047.9	1.10447	1.62548	3.15458	0.633111	0.108314	0.412123	0.0285746	6.49138	0.124905	4.70896	0.388236	33.4052	1054.96	1.05373	1.64376	6.49138	0.757821	0.0808656	0.359664	1.31e-06	11	443	c
188	424	70	11.2455	1.656	7.88562	14.3092	437.019	306.505	26.8851	0.576498	0.682653	0.0230814	4.15649	0.739935	8.99126	0.495522	28.5941	774.079	1.2762	1.8365	4.15649	0.685387	0.185853	0.559995	0.0154057	8.42817	0.449249	8.65153	0.366626	28.1746	746.865	1.25464	1.9412	8.42817	0.813482	0.080914	0.388584	1.49e-06	8	536	c
189	129	39	6.04196	1.65845	2.62154	8.33747	460.508	300.649	18.6804	0.85124	1.41587	0.0204904	5.8058	0.574215	7.81777	0.400523	28.1674	747.159	1.2287	1.82942	5.8058	0.746621	0.120297	0.456907	0.0216667	10.8778	0.105278	7.07886	0.297213	27.3889	703.275	1.12414	1.75555	10.8778	0.83877	0.087476	0.385177	1.55e-06	7	183	c
190	176	48	6.87733	1.76114	2.14492	9.10681	474.722	314.235	19.0406	0.702626	1.54219	0.0154765	5.46527	0.717123	10.6601	0.42356	29.2682	814.95	1.30794	1.90476	5.46527	0.737765	0.177981	0.557433	0.0253623	11.9565	0.385432	10.7276	0.367547	29.2464	812.768	1.214	1.76574	11.9565	0.882412	0.151094	0.500685	1.62e-06	9	236	c
191	159	50	6.20643	2.05382	0.601664	8.55815	459.898	325.888	18.113	0.692272	-0.383258	0.0293036	2.76095	0.707467	5.71903	0.501431	33.8193	1083	1.15621	1.65517	2.76095	0.605864	0.171004	0.515934	0.0255501	5.83929	0.434919	6.16677	0.370869	33.6071	1069.24	1.13536	1.68339	5.83929	0.734533	0.136496	0.467496	1.61e-06	6	233	c
192	541	90	11.9868	3.16298	2.22117	15.7268	484.697	338.191	29.3862	0.428091	-0.788359	0.0356885	2.21016	0.695592	4.63025	0.569554	30.9462	900.572	1.1425	1.58426	2.21016	0.56873	0.19045	0.532514	0.0258201	4.71116	0.375903	4.77438	0.43657	30.6455	883.274	1.10084	1.69375	4.71116	0.710611	0.0729874	0.347008	1.7e-06	12	876	c
193	270	58	9.20829	2.38864	5.15468	13.4184	367.783	347.298	27.4135	0.85314	-0.56757	0.0441097	4.94882	0.693825	9.08169	0.508774	26.8813	686.088	1.21593	1.72272	4.94882	0.717023	0.185668	0.545099	0.0301599	10.8447	0.282416	8.55644	0.369542	26.3973	655.21	1.18161	1.78223	10.8447	0.861652	0.100642	0.414857	1.43e-06	13	317	c
194	155	44	6.78838	2.22834	1.91827	9.83259	480.128	359.907	21.4232	0.882442	-0.784302	0.0195195	3.94085	0.708643	7.76293	0.46114	32.6506	1010.17	1.23315	1.79987	3.94085	0.673457	0.171367	0.535103	0.0258456	7.98319	0.372516	7.36127	0.340764	32.8403	1021.48	1.15411	1.74849	7.98319	0.790808	0.128561	0.462116	1.74e-06	8	876	c
195	91	32	4.99216	1.3226	2.67822	6.86825	446.256	347.261	15.093	0.841516	1.53221	0.0452472	3.2443	0.350739	3.49846	0.502858	33.4072	1058.69	0.973502	1.50161	3.2443	0.647772	0.0791699	0.341215	0.0530185	5.16418	0.071234	3.78013	0.425177	33.791	1086.16	0.924661	1.39968	5.16418	0.671458	0.0858501	0.343497	1.63e-06	6	136	c
196	109	34	5.54592	1.25908	2.92229	7.44065	442.088	364.653	15.7138	0.806454	-0.417346	0.0431893	2.71467	0.369937	3.15428	0.507695	35.744	1213.89	0.987898	1.47938	2.71467	0.609293	0.0573059	0.289098	0.0491453	5.07692	-0.00527241	3.52515	0.423921	35.7692	1218.42	0.935362	1.42742	5.07692	0.701648	0.0802498	0.335399	1.66e-06	5	2449	c
197	303	72	10.093	3.42956	3.54265	16.1931	436.043	382.446	31.6912	0.873693	-0.490289	0.0265055	2.50276	0.740845	5.8287	0.529627	33.2541	1045.43	1.18214	1.66386	2.50276	0.591533	0.190457	0.543587	0.0324858	4.57391	0.502404	5.59601	0.466427	32.6174	1006.43	1.11148	1.60619	4.57391	0.712465	0.134535	0.454747	1.68e-06	6	2449	c
198	251	58	9.59909	3.74411	3.31577	14.8867	411.616	404.23	33.8217	0.950112	-0.710813	0.030127	2.73073	0.646949	4.86732	0.520963	32.7285	1010.04	1.14837	1.6508	2.73073	0.61036	0.151551	0.486979	0.0256664	5.85204	0.297856	5.16727	0.398566	32.5663	1000.72	1.10367	1.69428	5.85204	0.748435	0.0777191	0.357815	1.65e-06	10	2449	c
199	201	50	8.36892	2.77674	3.86145	12.6992	386.577	429.196	27.3123	0.929659	-0.754329	0.0261834	2.94803	0.734653	6.55505	0.511871	32.0857	972.919	1.20449	1.71055	2.94803	0.621573	0.186985	0.545258	0.0274769	5.33775	0.448735	5.84137	0.435209	31.8411	957.6	1.12344	1.63714	5.33775	0.729875	0.106763	0.410608	1.62e-06	11	2449	c
200	459	82	12.7608	4.03851	6.29734	19.7484	351.954	456.373	40.8117	0.91751	-0.646078	0.0278917	2.4686	0.788041	6.82329	0.551312	31.3347	928.312	1.21018	1.69085	2.4686	0.595499	0.212703	0.575605	0.0251251	5.50663	0.516612	6.69587	0.444444	30.9019	901.729	1.16212	1.73293	5.50663	0.735789	0.1042	0.416473	1.6e-06	10	2449	c
201	287	84	8.6908	3.2267	0.747255	14.4465	313.005	480.928	28.1648	0.828841	-0.998902	0.0231795	3.704	0.615703	5.81918	0.483709	33.208	1041.52	1.17754	1.72954	3.704	0.667029	0.121984	0.448584	0.0217036	8.70968	0.232754	6.67593	0.344202	33.2903	1046.4	1.15922	1.7947	8.70968	0.824379	0.066285	0.340252	1.64e-06	13	1392	c
202	121	36	5.75137	0.774054	4.42094	6.98334	327.274	484.585	13.9633	0.448415	-0.693592	0.0173643	4.71838	0.678894	8.34708	0.416647	30.4893	879.425	1.25306	1.83242	4.71838	0.702081	0.151501	0.509365	0.021337	12.7011	0.204197	8.98008	0.285916	29.8966	843.035	1.19437	1.73271	12.7011	0.890044	0.0967438	0.40188	1.64e-06	13	1392	c
203	43	19	3.28171	0.510743	2.29898	4.04853	317.684	497.796	8.78815	0.693141	0.598024	0.0656358	1.55882	0.451926	2.42209	0.6	34.3676	1124.04	0.902651	1.29277	1.55882	0.512695	0.101238	0.358853	0.0632	3.36	-0.112288	2.5104	0.466353	34.72	1152.52	0.81068	1.25321	3.36	0.639109	0.0894826	0.332812	1.68e-06	10	1392	c
204	204	53	7.70568	2.04286	3.3753	11.2257	302.81	506.025	22.9289	0.79396	-1.2022	0.0196908	4.34349	0.720543	8.77129	0.471554	27.4626	712.385	1.27781	1.83861	4.34349	0.694121	0.185051	0.559161	0.017337	8.86061	0.394217	8.31335	0.357191	27.5515	713.631	1.2221	1.84546	8.86061	0.824661	0.0958344	0.411736	1.7e-06	12	1392	c
205	117	37	5.59502	0.993947	2.5319	6.80061	293.218	521.162	13.9599	0.584645	1.39849	0.0720558	1.22637	0.558332	2.38834	0.637562	37.2711	1326.86	0.904442	1.25215	1.22637	0.468487	0.13519	0.40746	0.0641333	2.13483	0.281343	2.48529	0.536153	37.3708	1336.11	0.87001	1.28907	2.13483	0.554607	0.0724453	0.303892	1.74e-06	13	1392	c
206	161	41	6.95744	1.75603	4.56104	9.89324	338.602	516.441	20.4878	0.856606	-1.09872	0.0207066	3.77329	0.680045	6.89659	0.47886	30.5325	878.129	1.23549	1.79049	3.77329	0.663621	0.159932	0.517172	0.0254511	7.96269	0.383921	7.46239	0.366754	30.8731	898.048	1.20563	1.74641	7.96269	0.792667	0.142323	0.484545	1.72e-06	14	290	c
207	183	47	7.35126	1.56632	3.91333	9.80964	318.356	575.728	20.0788	0.769091	-0.459138	0.0632465	1.47612	0.738394	3.82126	0.624395	32.7612	1015.45	1.04939	1.41786	1.47612	0.507707	0.234774	0.560523	0.0514678	3.0963	0.423819	3.68691	0.486301	32.3556	990.867	0.999292	1.4863	3.0963	0.617741	0.121741	0.418625	1.86e-06	13	1016	c
208	131	36	6.05862	0.787113	4.33093	7.76253	305.813	581.125	14.9124	0.609413	1.06219	0.0444523	1.9607	0.654622	3.83848	0.572027	33.1135	1036.3	1.06819	1.48678	1.9607	0.55219	0.187938	0.51515	0.0418835	3.60606	0.325753	3.67414	0.46803	32.9798	1029.37	1.00667	1.51313	3.60606	0.648207	0.107964	0.398243	1.88e-06	13	1016	c
209	230	61	8.15014	2.41464	2.28834	11.3646	160.001	606.887	22.7926	0.655166	0.477212	0.0303373	3.00369	0.608942	4.84047	0.522366	30.679	884.807	1.14171	1.65518	3.00369	0.630659	0.13384	0.459714	0.0334721	4.26882	0.409283	4.61325	0.473037	31.0968	910.65	1.08901	1.62197	4.26882	0.683527	0.106271	0.407962	1.81e-06	12	524	c
210	130	40	6.22672	1.68072	2.85974	9.15577	177.025	621.11	18.626	0.829206	-0.538802	0.0272815	4.88889	0.685844	8.78099	0.460802	28.2222	754.773	1.23078	1.75731	4.88889	0.714238	0.172432	0.531253	0.0232571	8.2234	0.472307	8.79185	0.329897	27.9468	738.658	1.19398	1.71441	8.2234	0.796472	0.170178	0.522536	1.89e-06	14	171	c
211	118	34	5.69466	0.634838	4.09342	6.8636	154.115	629.335	13.8991	0.46804	-1.1743	0.0336015	4.48418	0.765918	10.5782	0.470952	28.1338	756.163	1.25754	1.75062	4.48418	0.706046	0.213759	0.585057	0.0422526	11.907	0.387466	10.7194	0.32928	27.5116	722.991	1.12944	1.57786	11.907	0.843944	0.140279	0.460246	1.86e-06	14	319	c
212	230	58	7.92868	1.7351	3.25173	11.4088	149.977	666.854	21.1111	0.646774	-1.15462	0.0255947	5.03423	0.61268	7.49879	0.453542	27.1638	694.361	1.21386	1.77951	5.03423	0.716374	0.128307	0.465288	0.02252	9.25434	0.251555	7.18237	0.343044	26.8728	676.852	1.15558	1.78372	9.25434	0.820134	0.0690904	0.346174	1.81e-06	15	291	c
213	105	38	5.78995	2.00642	2.29491	8.92974	172.83	661.681	19.5312	0.9211	-0.331259	0.030451	3.78693	0.43711	4.36383	0.479812	31.4119	929.37	1.08535	1.61597	3.78693	0.670919	0.0790675	0.352932	0.0337114	5.63768	-0.0878032	3.59131	0.360802	31.2899	926.281	0.932749	1.53128	5.63768	0.717578	0.0541172	0.285739	1.87e-06	15	579	c
214	162	42	6.91121	1.55544	4.24618	9.73856	183.378	675.488	20.1106	0.828138	1.00008	0.0387458	4.16259	0.652259	6.98518	0.508978	28.4423	764.543	1.15193	1.65904	4.16259	0.685683	0.143108	0.475017	0.0421594	6.63934	0.381106	6.36388	0.432122	28.2295	751.721	1.08352	1.54942	6.63934	0.771273	0.120854	0.425081	1.81e-06	13	232	c
215	249	53	8.58992	1.50036	5.18343	11.67	167.492	691.231	22.1006	0.675185	-0.790013	0.0308645	2.54435	0.776508	6.69224	0.548618	30.2672	864.568	1.20959	1.65837	2.54435	0.594441	0.233956	0.596294	0.0252425	6.44811	0.473286	7.12108	0.411175	30.2689	863.643	1.18955	1.73788	6.44811	0.744201	0.125157	0.455056	1.69e-06	16	1144	c
216	41	19	3.15878	0.49368	2.33722	3.91212	194.6	722.704	8.5404	0.692324	-1.3618	0.0929331	1.21705	0.507184	2.2348	0.614729	35.5271	1204.03	0.881706	1.18249	1.21705	0.453842	0.133767	0.394876	0.0604915	3	-0.0437356	2.43715	0.485166	35.3478	1196.72	0.793906	1.28961	3	0.608056	0.0570775	0.270131	1.39e-06	14	1144	c
217	131	35	6.07864	0.922498	4.08122	7.51944	200.933	736.943	15.7961	0.691359	0.529194	0.0316735	1.96078	0.772469	5.30882	0.555934	33.5904	1066.94	1.16105	1.59248	1.96078	0.548335	0.222571	0.57349	0.0198025	5.78125	0.400375	5.82072	0.354636	32.9062	1022.2	1.14622	1.7495	5.78125	0.714986	0.105725	0.421192	1.2e-06	12	1144	c
218	69	25	4.2552	0.544489	2.95919	5.19199	211.898	743.651	10.9617	0.627633	-0.995147	0.0370132	3.25652	0.496359	4.23298	0.479096	30.4739	873.719	1.07929	1.56194	3.25652	0.638195	0.115557	0.417529	0.047619	5.33333	0.110943	3.99943	0.382436	29.9524	848.558	0.936983	1.40562	5.33333	0.689383	0.12474	0.412985	1.11e-06	11	1144	c
219	139	40	6.43777	1.71541	3.05164	8.83247	228.369	742.505	18.6158	0.850031	-1.11245	0.0800308	1.27651	0.519479	2.32825	0.637789	35.4012	1194.84	0.893213	1.23714	1.27651	0.476481	0.146827	0.421923	0.0656817	2.30189	0.200742	2.44001	0.514317	35.7736	1222.33	0.861233	1.31855	2.30189	0.567844	0.0441398	0.24037	1.11e-06	10	389	c
220	98	30	5.22312	0.832725	3.83739	6.54667	241.583	728.028	14.2205	0.74852	-0.696449	0.0369027	3.05638	0.633007	5.16409	0.514167	30.7834	891.727	1.15018	1.59284	3.05638	0.627863	0.174486	0.512351	0.0287396	7.84211	0.204328	5.92798	0.36209	30.8421	895.751	1.11196	1.58864	7.84211	0.787981	0.102085	0.39635	1.28e-06	12	134	c
221	208	62	7.84505	3.25913	0.451901	13.2316	272.317	671.948	26.2693	0.875175	1.41924	0.0229817	5.14993	0.446058	5.64844	0.449125	29.7827	833.004	1.15471	1.74987	5.14993	0.723712	0.0769575	0.36151	0.0327617	8.23841	0.0573771	5.36994	0.374999	29.6689	828.115	1.0529	1.59084	8.23841	0.808207	0.0491959	0.277672	1.75e-06	13	1417	c
222	387	84	12.155	5.09365	3.39121	20.9267	295.904	658.875	42.0653	0.949185	-0.835989	0.0267952	3.41315	0.60704	5.34287	0.498212	31.2273	916.897	1.17838	1.72283	3.41315	0.646265	0.129053	0.459934	0.0295195	6.53994	0.231929	5.25738	0.401464	31.147	912.581	1.11213	1.7432	6.53994	0.768648	0.0603785	0.320696	1.78e-06	12	1417	c
223	246	52	8.76871	2.32166	4.90177	12.4448	233.531	715.154	25.5536	0.853333	-0.943686	0.0424454	1.98313	0.638682	3.7443	0.56646	32.2306	980.836	1.05622	1.48767	1.98313	0.550674	0.143014	0.452532	0.0431722	3.63021	0.167013	3.17903	0.467192	31.7448	953.894	0.942063	1.48397	3.63021	0.654407	0.0438037	0.253571	1.45e-06	15	470	c
224	91	30	5.02692	0.992788	3.44642	6.7536	243.385	701.488	13.7568	0.720597	-1.16825	0.0381908	3.77346	0.496208	4.74506	0.502147	30.466	874.503	1.08411	1.59227	3.77346	0.676748	0.10558	0.403266	0.0424383	8.69444	0.0678359	5.66358	0.386476	31.1111	915.793	1.01404	1.51139	8.69444	0.80447	0.130583	0.436287	1.58e-06	14	470	c
225	225	51	8.12744	1.79926	5.02363	11.2189	118.666	638.926	23.1391	0.807782	-0.109531	0.0321428	2.97164	0.67956	5.63681	0.534688	30.217	859.84	1.16079	1.65425	2.97164	0.625526	0.164956	0.507207	0.0324691	5.98889	0.36859	5.74247	0.474414	30.3111	865.443	1.11415	1.62278	5.98889	0.742637	0.117166	0.427642	1.76e-06	17	598	c
226	121	39	6.16109	2.28368	2.05192	9.41794	99.3869	658.009	21.2554	0.920188	-0.761303	0.016083	5.7767	0.642879	9.08787	0.42115	27.4272	710.186	1.28122	1.88598	5.7767	0.748183	0.165316	0.536788	0.013417	16.2626	0.21748	11.3912	0.272859	28.303	757.15	1.25034	1.92596	16.2626	0.909869	0.161633	0.535986	1.65e-06	14	174	c
227	128	39	6.35104	2.07349	2.88333	9.36884	83.7549	678.171	20.8264	0.904028	-0.979614	0.0274225	3.17045	0.627159	5.25175	0.491295	31.5659	939.38	1.14316	1.65276	3.17045	0.628389	0.151349	0.486925	0.0326348	5.53933	0.248636	4.68618	0.377867	31.0899	911.766	1.04724	1.56515	5.53933	0.717078	0.0970652	0.384156	1.48e-06	13	339	c
228	184	48	7.2194	2.21521	1.51869	10.8443	91.5362	693.989	22.42	0.838841	-1.18108	0.0218844	4.44359	0.634159	7.07312	0.460011	28.3787	756.942	1.22921	1.79692	4.44359	0.692042	0.140238	0.487218	0.0203433	8.6014	0.305579	7.19321	0.319785	28.1958	746.25	1.17585	1.79485	8.6014	0.804361	0.141203	0.48854	1.42e-06	13	246	c
229	81	27	4.62665	0.345699	3.82397	5.28385	77.3681	716.199	11.2352	0.439988	-0.786154	0.0243438	4.56	0.667963	7.8667	0.428662	29.3891	816.71	1.21457	1.74941	4.56	0.702256	0.176451	0.535911	0.0305947	13.5424	0.170469	9.16267	0.283871	29.1017	799.771	1.16135	1.65228	13.5424	0.882706	0.16973	0.513754	1.15e-06	9	319	c
230	67	28	4.26832	1.37055	1.66139	6.23723	70.9523	728.362	13.7734	0.865971	-0.46104	0.0365903	3.45622	0.377367	3.77549	0.482874	32.8664	1021.63	1.02323	1.52954	3.45622	0.652312	0.0868537	0.360091	0.0401662	6.55263	-0.127838	3.90495	0.348166	32.3421	991.894	0.928301	1.45193	6.55263	0.732987	0.134636	0.434838	9.99e-07	8	319	c
231	144	42	6.34143	1.41821	2.97429	8.83924	124.283	570.75	17.5954	0.773441	-0.484098	0.0326234	2.96407	0.552868	4.31454	0.489693	32.3333	985.732	1.10133	1.59783	2.96407	0.621053	0.111912	0.415401	0.0333526	6.18627	0.133446	4.56947	0.405123	32.1275	976.069	1.01512	1.55094	6.18627	0.759478	0.0774013	0.34263	1.52e-06	8	603	c
232	119	36	5.99095	1.61842	3.51825	8.65963	98.6069	581.712	18.3031	0.867441	-0.585745	0.0269277	4.06373	0.562695	5.64633	0.458622	30.1127	852.138	1.17114	1.7121	4.06373	0.681229	0.118968	0.441272	0.0232558	8.60465	0.131242	5.95227	0.295026	30.0698	849.824	1.11083	1.72428	8.60465	0.784737	0.123297	0.45026	1.47e-06	11	603	c
233	114	32	5.70016	1.11471	4.02531	7.57978	87.3315	590.241	15.9362	0.773882	-1.03481	0.0393975	4.96456	0.505795	6.02277	0.506197	27.5671	713.128	1.14737	1.66218	4.96456	0.715784	0.140192	0.470806	0.032872	9.81176	0.116107	6.55031	0.367629	27.4588	707.117	1.10114	1.65073	9.81176	0.808628	0.145484	0.477674	1.46e-06	15	603	c
234	257	68	8.69131	2.98725	2.39345	13.9155	65.4415	596.985	28.4663	0.879672	0.0761394	0.0212702	4.06278	0.576372	5.79521	0.447693	30.1685	854.941	1.1888	1.77017	4.06278	0.675004	0.11099	0.433365	0.0215	7.19048	0.129155	5.12845	0.359403	29.7831	832.631	1.08974	1.7415	7.19048	0.782387	0.0530445	0.300883	1.34e-06	11	488	c
235	44	19	3.33341	0.448784	2.51367	4.07207	53.5965	613.151	8.75459	0.664736	-0.652191	0.0654337	1.75714	0.375272	2.40633	0.572689	34.0571	1104.05	0.888124	1.29113	1.75714	0.510264	0.0997862	0.356104	0.181474	3.08696	0.0508573	2.62618	0.539898	33.8696	1105.24	0.67582	0.895112	3.08696	0.52652	0.0439601	0.198582	1.3e-06	15	1625	c
236	94	30	5.39046	1.59641	2.85677	7.67427	67.9131	613.73	16.9262	0.88803	-0.77011	0.0285986	5.35849	0.501404	6.37358	0.437753	27.3836	704.62	1.14466	1.72108	5.35849	0.737674	0.114722	0.434717	0.0394287	11.0781	0.0252516	6.68256	0.322673	27.1406	691.846	1.0601	1.52365	11.0781	0.816586	0.119049	0.41882	1.42e-06	16	144	c
237	237	52	8.2022	0.997847	6.36829	9.94298	49.7352	627.641	20.1854	0.5877	0.212764	0.0516608	2.47497	0.680639	4.87488	0.565593	30.3306	867.032	1.10721	1.52327	2.47497	0.593373	0.175851	0.504473	0.0441897	5.06878	0.29504	4.59508	0.467879	29.8942	842.876	1.02266	1.53744	5.06878	0.714609	0.0851593	0.357508	1.29e-06	14	1625	c
238	103	34	5.57755	1.46675	2.92126	7.96342	41.6042	646.224	16.5813	0.867079	-0.965398	0.0534898	2.70286	0.236566	2.7702	0.515379	33.1486	1043.2	0.917878	1.39874	2.70286	0.607536	0.0334514	0.215572	0.0723562	3.85714	-0.187476	2.62409	0.451037	33.3377	1061.93	0.790991	1.27158	3.85714	0.652502	0.0683104	0.293272	1.21e-06	13	1625	c
239	148	43	6.71115	1.79624	4.0248	9.78675	35.2237	662.609	19.7045	0.859139	-1.29592	0.0463332	1.93411	0.525087	3.03628	0.550719	33.4845	1061.37	1.00135	1.4338	1.93411	0.538985	0.110991	0.393776	0.0596219	3.86957	0.0509176	3.03858	0.455301	33.5043	1066.34	0.915112	1.38381	3.86957	0.672778	0.0802255	0.330482	1.13e-06	10	1625	c
240	81	28	4.62722	0.623343	3.36265	5.64613	19.9608	689.973	12.0331	0.643256	-1.18192	0.0295168	4.18613	0.577493	5.95392	0.469221	28.5	763.196	1.15833	1.68167	4.18613	0.687919	0.139266	0.471745	0.0340254	5.82353	0.335381	5.3811	0.346846	27.5098	710.228	1.08015	1.54894	5.82353	0.706363	0.127722	0.436454	8.88e-07	7	1625	c
241	65	25	4.2397	1.05496	2.45601	5.84055	42.5246	691.706	12.7613	0.843631	0.874679	0.0362362	3.25352	0.463409	4.03166	0.464158	32.5775	1002.89	1.04945	1.57058	3.25352	0.629248	0.101139	0.392507	0.0490702	7.95455	-0.0619225	4.74535	0.354493	32.8636	1027.96	0.911633	1.39484	7.95455	0.806433	0.128773	0.417942	1.09e-06	11	179	c
242	282	64	9.14209	2.02213	5.07187	12.999	376.968	696.486	22.484	0.482941	-1.40125	0.0267247	3.83842	0.602222	5.82483	0.495984	29.1606	798.293	1.18146	1.72906	3.83842	0.672125	0.13623	0.472601	0.0349146	8.11842	0.225079	6.23822	0.417005	29.1096	795.814	1.12788	1.73513	8.11842	0.814654	0.0747306	0.354996	1.41e-06	11	1508	c
243	132	45	6.47639	2.54869	2.34389	10.3572	388.601	674.856	23.5844	0.941585	-1.46834	0.0171656	5.21508	0.583215	7.25632	0.413079	31.4723	934.744	1.22441	1.83406	5.21508	0.727407	0.112115	0.442428	0.0321746	8.16346	0.246849	6.41954	0.359752	32.1827	978.595	1.11695	1.64657	8.16346	0.803066	0.123902	0.442111	1.59e-06	13	1508	c
244	357	73	10.8032	3.75575	3.42326	16.8943	404.386	666.452	35.0364	0.904916	-0.92726	0.0461258	2.5857	0.574367	4.03748	0.558433	29.1299	797.099	1.06684	1.53419	2.5857	0.604563	0.120824	0.423136	0.05022	4.02414	0.248363	3.67692	0.495543	28.9483	788.578	0.985905	1.49271	4.02414	0.663343	0.0649206	0.308717	1.64e-06	16	1508	c
245	199	56	8.33928	3.39141	3.098	13.6797	399.032	641.775	29.9041	0.950299	-1.14481	0.0296485	3.58393	0.616907	5.67763	0.468422	30.0631	850.918	1.15307	1.67902	3.58393	0.653116	0.133443	0.461983	0.0274836	7.82432	0.158562	5.64938	0.383056	29.6757	828.356	1.08227	1.68684	7.82432	0.807025	0.0618305	0.319431	1.77e-06	14	1126	c
246	107	33	5.39306	0.983042	3.4435	6.82087	423.684	630.467	14.9082	0.720492	1.55477	0.0206447	6.42818	0.633736	9.77533	0.419838	26.2927	654.507	1.27601	1.83925	6.42818	0.771207	0.158185	0.52047	0.0178475	18.6163	0.175343	12.2873	0.266356	26.6395	671.506	1.24321	1.84643	18.6163	0.968214	0.118125	0.454859	1.8e-06	14	1895	c
247	364	83	11.3619	3.95558	5.25108	18.8653	427.549	660.758	37.5215	0.921019	1.23969	0.029692	3.5084	0.686101	6.58842	0.520905	28.229	749.023	1.20722	1.70534	3.5084	0.651203	0.171779	0.523631	0.0275825	7.72425	0.351271	6.95337	0.425001	28.1429	744.062	1.16189	1.7391	7.72425	0.793998	0.113154	0.433901	1.68e-06	11	1895	c
248	107	43	5.49576	1.83293	0.477169	9.07051	440.418	669.448	14.7765	0.55836	-0.726587	0.04155	4.17579	0.419761	4.59834	0.502701	30.3199	865.547	1.07387	1.57938	4.17579	0.683295	0.113456	0.415948	0.0767906	4.71212	-0.0254028	3.29769	0.516191	29.7727	840.22	0.863539	1.2791	4.71212	0.662343	0.123209	0.39319	1.65e-06	11	1895	c
249	73	26	4.49592	1.0884	2.4389	6.22851	440.034	691.68	13.6847	0.830146	-1.07576	0.0333283	6.77778	0.540316	8.37222	0.419725	25.9712	637.448	1.17732	1.71564	6.77778	0.771615	0.141872	0.480082	0.0282584	12.6471	0.170753	8.62562	0.317955	26.451	659.521	1.11987	1.61301	12.6471	0.871164	0.162367	0.498012	1.5e-06	8	137	c
250	127	38	6.08368	1.69585	2.82512	8.94323	479.027	720.348	18.4321	0.85202	-0.850672	0.0406858	2.71754	0.561954	4.10189	0.516081	28.9863	788.168	1.08512	1.55936	2.71754	0.607016	0.129464	0.440622	0.0453457	5.62245	0.227159	4.63752	0.445372	29.0306	793.6	1.01861	1.52162	5.62245	0.737058	0.0713812	0.326379	1.34e-06	9	188	c
251	197	48	8.02907	2.3795	4.62073	12.1731	505.523	695.443	24.7321	0.904113	-0.981976	0.0653224	1.49073	0.59301	2.83141	0.629173	32.2582	984.097	0.98102	1.35015	1.49073	0.506586	0.152802	0.447418	0.0411594	3.28758	0.251332	3.19562	0.474364	32.2026	981.02	0.969211	1.49334	3.28758	0.630001	0.0505078	0.272876	1.64e-06	17	577	c
252	154	52	7.22141	3.07119	1.59801	12.0294	528.352	673.085	26.8777	0.94834	-1.52118	0.0264667	4.41288	0.602286	6.54781	0.467558	28.4242	759.644	1.18704	1.74703	4.41288	0.694584	0.140371	0.481487	0.0237564	11.0268	0.183334	7.7511	0.29876	28.7411	777.85	1.13904	1.72442	11.0268	0.857536	0.0854196	0.377647	1.8e-06	14	305	c
253	127	38	6.08368	1.69585	2.82512	8.94323	479.027	720.348	18.4321	0.85202	-0.850672	0.0406858	2.71754	0.561954	4.10189	0.516081	28.9863	788.168	1.08512	1.55936	2.71754	0.607016	0.129464	0.440622	0.0453457	5.62245	0.227159	4.63752	0.445372	29.0306	793.6	1.01861	1.52162	5.62245	0.737058	0.0713812	0.326379	1.34e-06	9	188	c
254	101	32	5.27051	0.78437	3.99377	6.70915	457.6	739.886	13.7091	0.620159	-1.13916	0.0294621	5.82709	0.509534	6.94036	0.449242	23.6657	523.337	1.18454	1.709	5.82709	0.754101	0.125458	0.452192	0.0303111	13.7333	0.109592	8.71182	0.366763	23.7067	526.449	1.13822	1.62247	13.7333	0.879044	0.108303	0.411755	1.04e-06	4	160	c
255	92	29	4.99212	0.524345	3.54921	5.9199	830.974	682.089	12.304	0.54659	0.703194	0.0261073	4.82857	0.463636	5.50121	0.458067	28.473	759.5	1.15408	1.71197	4.82857	0.699573	0.108555	0.422381	0.0239899	9.56061	0.0867406	6.23433	0.309784	28.0455	737.43	1.10008	1.68709	9.56061	0.817171	0.129354	0.456182	1.05e-06	7	820	c
256	176	46	7.06791	1.01019	5.32041	9.19606	846.357	690.438	16.7018	0.424416	1.18014	0.0313412	2.83013	0.647865	5.01852	0.509245	29.9038	840.317	1.14496	1.63638	2.83013	0.613989	0.152342	0.486313	0.041099	4.89474	0.25852	4.30065	0.399219	29.6316	827.162	1.01595	1.52438	4.89474	0.696101	0.0786996	0.342636	9.41e-07	5	820	c
257	74	29	4.3721	0.795413	1.93257	5.35727	858.265	690.207	10.6317	0.429238	-0.486043	0.0380012	2.54545	0.510517	3.60015	0.500961	32.9339	1026.44	1.01858	1.48454	2.54545	0.58854	0.108776	0.396212	0.0353224	5.74074	0.0955263	4.17353	0.389239	33.4815	1061.13	1.01345	1.49966	5.74074	0.740866	0.0715699	0.324565	8.82e-07	7	820	c
258	140	43	6.47479	2.08066	3.36246	9.88676	887.144	672.26	21.5462	0.904595	0.296662	0.031776	4.52577	0.59853	6.63651	0.473273	27.8784	729.922	1.19686	1.70292	4.52577	0.709276	0.153629	0.496761	0.0211713	8.36364	0.218987	6.35435	0.300623	27.4343	704.557	1.13789	1.74168	8.36364	0.787766	0.108185	0.424985	7.47e-07	6	186	c
259	94	36	4.95639	1.75983	0.177865	7.35062	616.666	342.33	15.7074	0.817711	1.11855	0.0377733	2.63782	0.418921	3.26976	0.47023	35.5865	1202.29	1.00545	1.49296	2.63782	0.577422	0.0774709	0.336697	0.0659769	2.52459	-0.0958936	2.15184	0.482932	35.4426	1205.03	0.759093	1.24757	2.52459	0.569177	0.0300341	0.193201	1.78e-06	12	694	c
260	51	21	3.60404	0.461198	2.70592	4.4119	672.589	358.372	9.39534	0.663309	0.743724	0.0633609	1.6303	0.430469	2.43127	0.570303	36.0909	1243.47	0.886177	1.26389	1.6303	0.50742	0.0830622	0.322095	0.0743802	4	-0.127329	2.7741	0.413904	36.5455	1278.34	0.834941	1.19459	4	0.641141	0.0979498	0.340247	1.86e-06	8	255	c
261	137	40	6.11883	1.29178	2.67231	8.11426	683.865	331.876	15.8752	0.536618	-0.791704	0.0326604	4.57053	0.648031	7.49279	0.471919	28.4147	761.385	1.21208	1.72944	4.57053	0.707	0.158869	0.507979	0.0331453	7.93269	0.331169	6.93027	0.377305	28.2596	750.721	1.14998	1.68245	7.93269	0.793753	0.151105	0.490338	1.86e-06	13	7703	c
262	54	23	3.75318	0.858982	1.61573	5.00453	701.554	329.136	10.6857	0.755507	1.2253	0.0386247	2.59538	0.510969	3.65359	0.491431	33.763	1078.35	1.04705	1.51489	2.59538	0.587717	0.110419	0.402814	0.0369407	5.32258	0.104282	3.97112	0.351438	33.7742	1081.46	0.988599	1.4985	5.32258	0.677858	0.158452	0.476766	1.88e-06	17	7703	c
263	178	54	7.71021	3.01736	2.36175	12.424	711.963	353.791	28.6872	0.947783	0.130049	0.0212104	4.6462	0.728864	9.56802	0.478255	28.5234	773.493	1.24949	1.80362	4.6462	0.696951	0.20365	0.579354	0.0223058	9.04918	0.489992	9.87161	0.395946	27.8525	736.09	1.21316	1.77267	9.04918	0.817448	0.171048	0.531227	1.89e-06	14	295	c
264	679	106	14.9154	5.17564	4.61623	24.3006	709.346	376.292	46.5946	0.884382	-0.540273	0.0483874	1.59763	0.721241	3.86561	0.621609	30.6806	884.997	1.098	1.47992	1.59763	0.519891	0.214956	0.547563	0.0400348	2.87652	0.45814	3.6543	0.517159	30.3096	864.044	1.04691	1.54279	2.87652	0.620791	0.0945591	0.376798	1.9e-06	9	7703	c
265	99	39	5.33972	1.57567	2.45566	8.03547	721.305	384.796	14.7915	0.745482	0.360164	0.0472947	1.92923	0.505029	2.94883	0.551873	34.04	1099.3	0.972864	1.38743	1.92923	0.542704	0.103327	0.374562	0.0611216	4.53623	0.118292	3.57241	0.484156	33.9855	1098.28	0.932051	1.3337	4.53623	0.691173	0.0754577	0.31512	1.89e-06	8	7703	c
266	64	25	4.11696	0.943728	2	5.45894	711.315	397.652	11.781	0.785218	-1.25547	0.0598073	2.08095	0.324155	2.53952	0.56741	34.4619	1130.23	0.903721	1.33919	2.08095	0.566631	0.0722883	0.309126	0.06395	3.07317	-0.0977476	2.39976	0.45165	34.2439	1121.38	0.794693	1.27672	3.07317	0.603497	0.0730472	0.303742	1.91e-06	10	7703	c
267	100	32	5.28298	0.93083	3.29847	6.88784	727.341	330.772	13.9607	0.729837	-0.779353	0.0342119	2.4898	0.672273	4.79858	0.546881	32.3907	989.092	1.14347	1.60318	2.4898	0.590682	0.184902	0.527871	0.0439964	5.10448	0.2894	4.59167	0.420147	31.5522	942.906	0.996655	1.47197	5.10448	0.680389	0.200391	0.528681	1.9e-06	19	7703	c
268	144	40	6.33351	0.962657	4.42832	8.14923	740.165	331.149	15.3645	0.486962	1.54541	0.0236041	3.80632	0.609767	5.87699	0.470645	28.8063	779.087	1.17689	1.73421	3.80632	0.66607	0.127578	0.458774	0.0271241	6.87755	0.252349	5.59944	0.359622	28.102	741.101	1.09128	1.65528	6.87755	0.766641	0.115826	0.429113	1.89e-06	16	7703	c
269	73	26	4.39137	0.657132	3.23077	5.47506	735.61	349.099	12.0904	0.722493	1.38466	0.0238401	4.59592	0.575459	6.41281	0.410068	29.1347	798.687	1.17702	1.72007	4.59592	0.696276	0.132472	0.46533	0.0460225	10.0204	0.0848089	6.47449	0.311746	27.8571	731.519	1.031	1.46606	10.0204	0.793525	0.0977489	0.373989	1.89e-06	13	103	c
270	48	21	3.45003	0.626138	2.38856	4.41216	738.423	368.107	9.7817	0.748933	1.46441	0.05958	1.95455	0.507237	2.98325	0.542972	33.0455	1035	0.967151	1.35153	1.95455	0.539352	0.11542	0.390602	0.102811	4.03846	-0.0226634	2.97448	0.452262	32.5769	1012.75	0.813884	1.13687	4.03846	0.64593	0.0611904	0.263148	1.88e-06	10	7703	c
271	99	39	5.33972	1.57567	2.45566	8.03547	721.305	384.796	14.7915	0.745482	0.360164	0.0472947	1.92923	0.505029	2.94883	0.551873	34.04	1099.3	0.972864	1.38743	1.92923	0.542704	0.103327	0.374562	0.0611216	4.53623	0.118292	3.57241	0.484156	33.9855	1098.28	0.932051	1.3337	4.53623	0.691173	0.0754577	0.31512	1.89e-06	8	7703	c
272	190	48	7.32873	1.63107	2.97982	10.1409	737.364	395.209	19.6385	0.720035	-1.49135	0.0348521	3.66963	0.83889	12.3886	0.524788	30.5289	900.565	1.22563	1.67132	3.66963	0.650799	0.259757	0.626757	0.0384218	8.45205	0.636198	12.6163	0.439386	30.2877	884.958	1.18535	1.64035	8.45205	0.798092	0.21056	0.565908	1.87e-06	10	7703	c
273	182	52	7.15337	1.29327	4.31044	9.56572	753.732	392.394	17.6108	0.550467	-1.07284	0.0338345	1.99372	0.775325	5.4369	0.57897	31.3626	927.495	1.16758	1.6057	1.99372	0.559164	0.232829	0.587361	0.0372194	3.87143	0.551431	5.31531	0.494233	31.2857	924.395	1.10286	1.58968	3.87143	0.68209	0.156085	0.485752	1.82e-06	8	7703	c
274	161	43	6.91765	1.64249	3.59029	9.82081	525.572	391.738	19.4025	0.804767	0.819132	0.0250721	4.04594	0.480845	4.89665	0.438799	31.3145	922.477	1.13277	1.69275	4.04594	0.67077	0.0918547	0.387795	0.0221124	7.87903	0.086141	5.31086	0.353356	31.379	927.369	1.08044	1.71609	7.87903	0.804801	0.0489755	0.287314	1.87e-06	8	1457	c
275	268	58	9.03095	2.63059	5.1231	13.4935	765.55	328.391	28.3812	0.887741	0.0497079	0.023798	3.13889	0.739846	7.03275	0.521675	29.3858	813.482	1.23461	1.746	3.13889	0.632468	0.198097	0.564625	0.0218522	5.97235	0.479637	6.73864	0.433594	29.4286	814.942	1.18039	1.75683	5.97235	0.751194	0.123841	0.454971	1.86e-06	18	7703	c
276	176	56	8.0679	3.68846	2.12568	13.9239	786.718	348.022	31.7275	0.966212	0.373611	0.0307629	2.95868	0.61553	4.84774	0.514502	32.086	970.358	1.13558	1.6368	2.95868	0.61929	0.142197	0.470783	0.0292932	5.27869	0.325793	4.91474	0.401644	31.8852	959.726	1.07379	1.59453	5.27869	0.716065	0.124863	0.437405	1.76e-06	11	7703	c
277	369	64	10.3917	1.78523	6.10826	13.5934	800.367	372.007	26.5854	0.700065	0.394922	0.0427505	2.40455	0.626086	4.21538	0.569605	30.0962	851.161	1.10129	1.55442	2.40455	0.584322	0.151743	0.474624	0.0346406	4.36278	0.295339	4.09565	0.443215	30.0473	849.62	1.03698	1.60126	4.36278	0.683459	0.0483531	0.276185	1.63e-06	9	7703	c
278	101	36	5.42863	1.69031	2.225	8.1959	793.698	332.173	17.2827	0.880826	0.238898	0.0437002	5.36364	0.45945	5.96128	0.441947	28.0909	743.204	1.09605	1.61993	5.36364	0.727795	0.0809805	0.357469	0.0331361	12.1846	-0.0603502	6.74556	0.28246	27.6923	721.621	1.03105	1.57183	12.1846	0.857131	0.0935042	0.377999	1.76e-06	14	7703	c
279	90	31	5.03116	1.28817	3.34505	7.19962	810.215	344.636	15.94	0.8564	-1.17325	0.0289073	7.70724	0.620969	11.167	0.432936	26.3388	662.343	1.25133	1.79038	7.70724	0.79292	0.169048	0.530575	0.0403117	15	0.300954	11.7289	0.352333	25.9508	644.301	1.1237	1.58483	15	0.9131	0.244868	0.597821	1.64e-06	13	7703	c
280	285	65	9.39621	2.62651	4.97815	13.8946	828.651	368.079	28.8367	0.869371	-0.132042	0.0238302	2.79223	0.755518	6.71051	0.54339	30.6175	883.306	1.23626	1.7367	2.79223	0.622368	0.216101	0.586052	0.0187985	7.43644	0.372408	6.92459	0.395529	30.3517	867.53	1.1752	1.83071	7.43644	0.79648	0.105372	0.429232	1.44e-06	9	7703	c
281	74	30	4.41933	1.09117	2.06047	5.99824	847.571	334.867	13.3179	0.802996	0.0636403	0.0312537	3.97119	0.539026	5.30739	0.438748	29.1317	798.061	1.11735	1.64167	3.97119	0.666794	0.120831	0.43626	0.0839359	4.90909	0.019802	3.50413	0.423941	28.7273	781.072	0.871128	1.20983	4.90909	0.708979	0.0940528	0.335485	1.4e-06	14	349	c
282	84	28	4.71263	0.325765	4.18406	5.30559	840.616	343.188	11.0466	0.194092	0.0136457	0.0167123	7.37063	0.59242	10.0419	0.393504	27.0839	694.143	1.28962	1.90415	7.37063	0.78909	0.141569	0.50181	0.0234722	15.25	0.238003	11.0066	0.26583	27.4167	712.789	1.18668	1.7017	15.25	0.908651	0.182206	0.537623	1.43e-06	13	349	c
283	403	98	13.8634	6.29206	2.76689	25.2567	875.001	352.756	50.7243	0.972816	-0.360165	0.0247322	3.04227	0.704027	6.13945	0.53512	30.4643	872.918	1.21705	1.73718	3.04227	0.626065	0.18325	0.543717	0.0189772	6.26498	0.384893	6.0926	0.402101	30.2145	857.74	1.16913	1.80965	6.26498	0.753271	0.0898373	0.395628	1.08e-06	9	7703	c
284	77	24	4.58355	0.395018	3.87858	5.23228	712.041	19.6148	11.4303	0.524029	0.463535	0.0222545	8.37548	0.594682	11.332	0.372126	26.682	678.657	1.27127	1.84108	8.37548	0.814068	0.159436	0.522587	0.0242347	20.6964	0.189384	13.7659	0.273394	27.0893	698.027	1.25017	1.7064	20.6964	0.949334	0.162816	0.510876	8.44e-07	6	296	l
285	102	32	5.27113	0.796968	3.81019	6.64869	736.608	60.8977	14.5702	0.707843	-0.492657	0.0298658	7.07123	0.649805	11.0961	0.428006	26.547	672.931	1.25635	1.77924	7.07123	0.784734	0.185306	0.55197	0.0378086	16.375	0.112491	10.2253	0.325947	25.2083	600.42	1.12735	1.61531	16.375	0.937814	0.131368	0.450746	1.27e-06	10	168	l
286	104	32	5.36528	0.901879	3.53912	7.00181	611.699	106.685	13.7585	0.632133	1.16912	0.0219367	6.9581	0.559349	8.89525	0.395646	28.0028	741.229	1.23329	1.85911	6.9581	0.780106	0.126262	0.470776	0.02	11.52	0.13253	7.64	0.266437	27.6	713.749	1.1669	1.7677	11.52	0.851623	0.105588	0.422907	1.32e-06	8	137	l
287	43	18	3.30046	0.36706	2.71314	3.87657	607.491	126.807	8.64073	0.593705	-0.458269	0.0236827	7.32117	0.390926	7.01008	0.344891	27.2336	696.141	1.16785	1.74663	7.32117	0.776465	0.105229	0.419934	0.0902367	13.7308	0.027197	8.05732	0.377421	27.0385	696.599	0.921409	1.21676	13.7308	0.844357	0.152654	0.426807	1.43e-06	10	77	l
288	89	28	4.98431	0.843529	3.19298	6.37367	504.166	162.366	13.9578	0.754342	-0.545871	0.0324727	6.79276	0.564118	8.79198	0.424056	25.6809	623.549	1.20289	1.76569	6.79276	0.772444	0.152393	0.502681	0.0288762	14.5968	0.136736	9.45441	0.312987	25.1452	595.547	1.13836	1.62961	14.5968	0.90047	0.124618	0.441279	1.39e-06	11	117	l
289	97	32	5.40774	1.60976	2.50176	8.10918	369.591	145.883	16.8763	0.875742	-0.977382	0.0251106	3.95732	0.574139	5.64626	0.471804	32.0183	965.967	1.1745	1.71417	3.95732	0.669423	0.140024	0.476946	0.0308163	9.01429	0.119865	6.12097	0.366619	32.0429	969.204	1.09558	1.54612	9.01429	0.794328	0.11364	0.412267	9.1e-07	7	157	l
290	68	24	4.22853	0.606449	3.20833	5.14394	617.892	161.314	11.3441	0.662407	-0.0341227	0.0380174	9.59912	0.454874	9.8045	0.405915	26.859	684.782	1.18486	1.75766	9.59912	0.844175	0.11808	0.4449	0.0975057	13.2143	0.161073	8.87571	0.343761	26.5952	676.442	0.940735	1.20489	13.2143	0.775071	0.0815532	0.312037	1.57e-06	15	93	l
291	81	27	4.62625	0.479798	3.85345	5.54084	606.191	188.23	12.0477	0.598488	-1.2686	0.0231802	9.28727	0.483832	9.99636	0.366739	25.6	621.063	1.22041	1.84185	9.28727	0.830386	0.124382	0.46555	0.0314349	13.2115	0.0294369	7.80612	0.293116	24.7115	572.436	1.08057	1.65789	13.2115	0.844405	0.138863	0.468154	1.62e-06	16	94	l
292	83	27	4.71606	0.624289	3.86323	5.81812	697.566	165.972	12.3184	0.658345	0.0733054	0.0226095	5.1383	0.633303	8.0062	0.473559	29.4574	819.654	1.23037	1.7633	5.1383	0.715998	0.180327	0.543089	0.0262856	7.16949	0.462023	7.66339	0.350234	29.2034	806.251	1.15403	1.62654	7.16949	0.730067	0.169246	0.509632	1.65e-06	11	206	l
293	78	27	4.55267	0.643811	3.0743	5.62792	696.125	175.858	12.3372	0.666309	-0.424918	0.0325507	9.60837	0.467901	10.0287	0.419348	24.3688	562.825	1.21027	1.78349	9.60837	0.834193	0.150838	0.502449	0.0320661	18.4182	0.0305461	10.4993	0.2985	24.0545	543.825	1.15811	1.64253	18.4182	0.921389	0.221914	0.579953	1.67e-06	10	206	l
294	75	25	4.48326	0.426548	3.76276	5.29513	878.599	162.294	11.6591	0.601592	0.7885	0.0358465	8.2332	0.618149	11.7807	0.436426	24.834	592.084	1.22902	1.70839	8.2332	0.813201	0.155952	0.500955	0.0379464	22.3929	0.16392	14.3916	0.316958	24.9286	593.432	1.21658	1.62918	22.3929	0.981469	0.101417	0.399683	1.36e-06	15	105	l
295	53	21	3.66401	0.430116	2.86349	4.34353	901.108	204.214	9.46776	0.57816	1.42203	0.0326439	7.87283	0.243688	6.20475	0.39404	23.8844	532.771	1.08474	1.67229	7.87283	0.786667	0.0952971	0.392539	0.0844233	5.93103	-0.16	3.55648	0.405613	22.3448	466.569	0.84426	1.23025	5.93103	0.732258	0.125059	0.389046	1.12e-06	11	71	l
296	76	27	4.46891	0.689927	3.22563	5.60729	892.965	218.836	12.5405	0.705637	0.478616	0.0271742	10.7137	0.481188	11.3252	0.366711	24.8314	587.027	1.24241	1.82956	10.7137	0.859918	0.130408	0.474619	0.0349865	21.3922	0.0275018	11.9986	0.250858	24.5294	569.762	1.13795	1.59917	21.3922	0.944905	0.235613	0.589579	1.2e-06	12	97	l
297	70	25	4.28558	0.377578	3.82769	5.03698	764.794	181.974	10.9768	0.565152	-0.817366	0.0269353	7.04255	0.540838	8.66892	0.408592	25.8511	630.239	1.22169	1.77005	7.04255	0.783308	0.148174	0.496665	0.0251978	17.2245	0.0739397	10.2999	0.244708	25.6735	620.579	1.16626	1.67656	17.2245	0.88019	0.139403	0.471333	1.82e-06	14	93	l
298	106	34	5.48455	1.42796	3.24464	7.81767	779.28	194.437	17.3953	0.855298	1.45324	0.0258615	6.82044	0.692185	12.0788	0.437769	26.2569	661.451	1.27779	1.8268	6.82044	0.77812	0.2033	0.581902	0.0443582	13.3117	0.416807	12.4128	0.363075	26.2987	661.706	1.21151	1.62439	13.3117	0.903487	0.213354	0.567061	1.84e-06	16	342	l
299	73	27	4.44178	0.754763	3.2542	6.34188	468.858	195.608	12.0325	0.673551	-0.299919	0.0333311	9.45455	0.592677	12.6057	0.419923	28.595	784.514	1.25376	1.7913	9.45455	0.839447	0.148205	0.499282	0.0601128	14.1042	0.319021	11.3558	0.366182	27.8125	739.853	1.11917	1.42569	14.1042	0.849126	0.167873	0.479502	1.36e-06	9	197	l
300	92	29	4.98458	0.589692	3.83441	5.96073	503.905	291.313	12.7381	0.587704	-0.847679	0.0204636	6.44762	0.554426	8.23518	0.396372	25.927	631.53	1.24832	1.8579	6.44762	0.768584	0.129158	0.475676	0.0217751	13.2154	0.154713	8.8171	0.258804	25.0923	589.853	1.17997	1.75262	13.2154	0.870248	0.178309	0.538915	1.62e-06	13	179	l
301	62	23	3.99083	0.309761	3.35234	4.48901	510.374	299.971	9.89916	0.478698	1.28019	0.0240362	7.01456	0.44103	7.27455	0.384934	28.7233	775.635	1.19965	1.77692	7.01456	0.778631	0.112428	0.436775	0.0364892	12	0.0264562	7.16305	0.274796	28.4103	760.451	1.06435	1.53295	12	0.856127	0.143799	0.459797	1.65e-06	14	179	l
302	94	32	5.01175	0.597457	3.71993	6.12069	541.37	311.246	12.7053	0.541763	1.16376	0.0249359	6.35423	0.673187	10.7215	0.396444	26.5172	669.175	1.28545	1.85361	6.35423	0.769022	0.167563	0.536206	0.0259412	14.4242	0.225711	10.3145	0.262493	26.1212	645.306	1.17181	1.69566	14.4242	0.899454	0.163068	0.509865	1.69e-06	15	1000	l
303	96	29	5.12014	0.688363	3.68595	6.38155	601.466	302.171	13.5307	0.64501	1.53087	0.0232507	7.13636	0.59774	9.87033	0.410536	25.1667	600.613	1.24453	1.82609	7.13636	0.789979	0.152446	0.51008	0.0331686	14.0484	0.107073	8.86648	0.303812	23.6613	525.633	1.11766	1.65788	14.0484	0.905184	0.159938	0.500393	1.7e-06	14	127	l
304	88	30	4.8176	0.495135	4.0223	5.70779	633.8	276.214	12.1236	0.540331	-0.00316696	0.0243566	5.51839	0.754868	12.256	0.440879	26.6488	683.405	1.27365	1.80693	5.51839	0.740914	0.197057	0.571235	0.0326056	12.8814	0.42118	12.1273	0.344417	26.6102	678.731	1.17193	1.64542	12.8814	0.876233	0.161754	0.501415	1.71e-06	10	1476	l
305	91	28	4.95138	0.517909	3.84074	5.71038	651.458	300.444	12.9058	0.627513	-1.53063	0.0265553	6.55449	0.617022	9.55726	0.409406	27.7083	727.947	1.24567	1.8124	6.55449	0.768777	0.14839	0.502103	0.0231864	16.1364	0.167787	10.6948	0.291021	27.4697	713.575	1.18411	1.75804	16.1364	0.929223	0.196254	0.563816	1.78e-06	14	484	l
306	64	23	4.07945	0.276514	3.4102	4.61321	745.838	268.129	10.0273	0.417168	0.843473	0.0314863	6.82629	0.491897	7.71743	0.407576	24.4977	564.08	1.17306	1.70685	6.82629	0.775249	0.147665	0.488105	0.0332018	12.9744	-0.0259956	7.32281	0.300868	23.7949	528.743	1.06985	1.55043	12.9744	0.871731	0.111329	0.408718	1.86e-06	14	281	l
307	96	31	5.10321	0.879266	3.62211	6.78164	810.787	257.626	14.1782	0.730648	-0.290088	0.0319241	6.37386	0.499572	7.36841	0.431279	24.2766	553.443	1.16073	1.73623	6.37386	0.76911	0.107332	0.422782	0.0307692	9	0.109287	6.05213	0.345983	23.3385	507.708	1.05618	1.62194	9	0.812336	0.103255	0.402339	1.76e-06	14	131	l
308	53	21	3.66401	0.430116	2.86349	4.34353	383.93	358.969	9.8278	0.645077	1.37428	0.0332955	7.72254	0.407166	7.51325	0.376116	25.9306	633.636	1.12528	1.70056	7.72254	0.79891	0.114983	0.432846	0.0319091	17.4419	0.0182648	9.88318	0.274034	27.9535	738.946	1.10474	1.60262	17.4419	0.950739	0.125923	0.440175	1.5e-06	10	76	l
309	77	26	4.559	0.663634	3.19948	5.8709	397.829	353.037	11.7169	0.654206	0.680269	0.0288085	5.72973	0.752581	12.579	0.445181	30.1776	878.101	1.23775	1.73975	5.72973	0.746277	0.213465	0.583227	0.0342176	7.15686	0.657891	11.4599	0.340324	29.9412	860.489	1.20433	1.574	7.15686	0.762383	0.256229	0.60855	1.52e-06	10	202	l
310	112	32	5.57376	0.608842	4.45112	6.91466	822.583	266.44	13.8479	0.528127	1.12489	0.0231329	5.11568	0.645345	8.21218	0.429245	25.6144	617.38	1.24953	1.81013	5.11568	0.722594	0.160613	0.520602	0.0381287	11.0116	0.196805	7.85489	0.350562	25.5698	614.277	1.11841	1.61351	11.0116	0.869271	0.0970473	0.389543	1.7e-06	15	136	l
311	99	34	5.22976	1.53249	2.55663	7.19116	351.618	479.755	16.5697	0.861258	1.51682	0.0245801	6.78209	0.517763	8.03191	0.407606	29.7731	837.289	1.20842	1.80528	6.78209	0.785527	0.118784	0.451508	0.0189043	13.3472	0.0632958	8.12457	0.269968	30.375	868.813	1.1575	1.78791	13.3472	0.871486	0.104671	0.423323	1.64e-06	11	2449	l
312	41	19	3.15878	0.49368	2.33722	3.91212	311.408	340.153	8.54097	0.630718	-1.47363	0.0179376	10.876	0.432736	10.5863	0.301188	27.5736	720.994	1.23879	1.84323	10.876	0.855796	0.146392	0.502585	0.0362426	23.5385	-0.158922	11.1553	0.170827	28.3846	764.009	1.05467	1.51044	23.5385	0.928509	0.195137	0.527857	1.24e-06	11	70	l
313	94	30	5.06413	0.884512	3.73348	6.62361	330.127	366.188	14.3199	0.756257	-1.22339	0.0376046	7.41615	0.537489	9.01727	0.43165	26.6149	670.986	1.19183	1.72923	7.41615	0.787873	0.147167	0.490101	0.0383715	9.40323	0.0796339	6.10842	0.371945	25.3387	600.298	1.06388	1.57641	9.40323	0.840171	0.149594	0.474337	1.4e-06	10	123	l
314	64	24	4.10574	0.598466	2.76008	5.15927	335.5	389.756	11.0955	0.687091	0.760549	0.0246195	6.26415	0.58516	8.55008	0.420008	27.9151	737.055	1.21081	1.7487	6.26415	0.752051	0.13591	0.474425	0.0274943	11.9286	0.288099	9.37798	0.27189	27.5	717.026	1.12875	1.60877	11.9286	0.844878	0.153314	0.484172	1.47e-06	7	206	l
315	82	27	4.67161	0.641853	3.57786	5.75303	253.599	417.098	12.4394	0.65583	0.137271	0.0431267	6.20144	0.541234	7.75882	0.428372	27.705	724.353	1.1811	1.68648	6.20144	0.766474	0.143122	0.478467	0.037461	12.5323	0.110418	8.0439	0.389849	28.3387	758.313	1.08674	1.57304	12.5323	0.864619	0.13687	0.454264	1.34e-06	8	97	l
316	94	30	5.06413	0.884512	3.73348	6.62361	330.127	366.188	14.3199	0.756257	-1.22339	0.0376046	7.41615	0.537489	9.01727	0.43165	26.6149	670.986	1.19183	1.72923	7.41615	0.787873	0.147167	0.490101	0.0383715	9.40323	0.0796339	6.10842	0.371945	25.3387	600.298	1.06388	1.57641	9.40323	0.840171	0.149594	0.474337	1.4e-06	10	123	l
317	54	22	3.69302	0.416638	2.97823	4.43712	206.219	535.825	9.60672	0.51405	0.71164	0.0245513	9.96591	0.45341	10.1164	0.371493	24.4886	567.783	1.22314	1.80886	9.96591	0.852177	0.129577	0.470835	0.0285494	16.3611	-0.0692081	8.65104	0.21942	24.75	573.058	1.11074	1.59385	16.3611	0.897975	0.121792	0.432136	1.69e-06	13	82	l
318	104	33	5.39462	1.34157	3.32685	7.63811	216.901	560.44	16.6361	0.852171	-0.25966	0.0235271	6.85154	0.729954	13.6859	0.456969	28.5714	788.855	1.27742	1.81204	6.85154	0.77783	0.204893	0.582038	0.0280762	9.84375	0.506076	10.9648	0.344443	27.125	703.713	1.16931	1.64146	9.84375	0.822831	0.213812	0.570048	1.8e-06	15	129	l
319	41	18	3.18763	0.247504	2.82843	3.60555	333.071	592.097	8.11307	0.574427	0.782862	0.109852	3.63846	0.350998	3.80312	0.531887	27.9462	737.268	0.933313	1.29838	3.63846	0.667322	0.0918379	0.342761	0.0793951	5.04348	0.0140429	3.55766	0.468424	27.8261	732.636	0.854832	1.1999	5.04348	0.644113	0.188807	0.470455	1.88e-06	14	63	l
320	54	22	3.69302	0.416638	2.97823	4.43712	206.219	535.825	9.60672	0.51405	0.71164	0.0245513	9.96591	0.45341	10.1164	0.371493	24.4886	567.783	1.22314	1.80886	9.96591	0.852177	0.129577	0.470835	0.0285494	16.3611	-0.0692081	8.65104	0.21942	24.75	573.058	1.11074	1.59385	16.3611	0.897975	0.121792	0.432136	1.69e-06	13	82	l
321	49	21	3.48384	0.379494	2.75245	4.08887	188.756	583.918	9.10776	0.551974	0.247248	0.0328673	8.44937	0.472571	9.00996	0.37044	27.2722	703.808	1.19117	1.7336	8.44937	0.815104	0.145223	0.487588	0.0229492	16.5	-0.0439941	8.90234	0.194013	27.125	692.146	1.10507	1.66507	16.5	0.898111	0.186234	0.538148	1.8e-06	13	172	l
322	87	28	4.83201	0.486968	3.56875	5.65877	192.711	594.546	11.9101	0.508354	0.527657	0.0207008	5.60943	0.584873	7.75627	0.389786	28.2694	752.99	1.22173	1.80257	5.60943	0.731788	0.144128	0.494165	0.0250693	12.7937	0.295376	10.0784	0.308775	28.5079	771.634	1.15626	1.70381	12.7937	0.897833	0.165455	0.514383	1.85e-06	14	172	l
323	43	19	3.24319	0.251814	2.84649	3.65591	156.951	649.922	8.17614	0.476278	-0.83702	0.0481645	7.21898	0.297084	6.13502	0.42675	25.9927	634.73	1.06462	1.57551	7.21898	0.771736	0.0850478	0.361377	0.0502959	10.2692	-0.0790394	5.75851	0.357261	26.3462	652.172	0.980682	1.37434	10.2692	0.818589	0.145201	0.440002	1.87e-06	16	92	l
324	96	33	5.14411	1.29315	2.27354	7.1744	230.51	670.937	15.3668	0.78913	1.49868	0.0256615	6.87077	0.586598	9.31003	0.433467	26.8646	683.016	1.2395	1.82405	6.87077	0.779984	0.155597	0.514692	0.0285966	11.3968	0.217865	8.28571	0.323129	26	635.981	1.13567	1.66732	11.3968	0.862449	0.179778	0.529727	1.83e-06	15	653	l
325	74	26	4.40008	0.602206	2.61793	5.29946	239.277	666.276	11.4096	0.581266	0.289039	0.0185137	5.69231	0.629363	8.67908	0.378579	26.7449	675.431	1.24187	1.83382	5.69231	0.733228	0.16013	0.522756	0.0281191	12.2826	0.0654273	7.57124	0.279806	25.6739	617.064	1.1166	1.62098	12.2826	0.873409	0.111866	0.418039	1.84e-06	16	653	l
326	55	22	3.72184	0.300035	3.12812	4.163	234.507	638.845	8.7869	0.128654	-1.51148	0.0536265	6.37222	0.408233	6.38407	0.459779	26.8611	680.557	1.06591	1.51905	6.37222	0.770876	0.104098	0.391971	0.0520833	7.86111	-0.0747402	4.65721	0.375449	26.8056	674.949	0.956345	1.38502	7.86111	0.792855	0.114706	0.393826	1.94e-06	18	637	l
327	96	31	5.10107	0.465149	4.21841	6.4674	207.152	626.672	11.9664	0.199768	0.758837	0.0236838	6.8872	0.563254	8.88466	0.407861	25.1006	594.394	1.23133	1.79837	6.8872	0.767311	0.163194	0.523	0.0331964	11.2206	0.100602	7.23784	0.345391	24.2794	551.231	1.09536	1.63095	11.2206	0.85082	0.148349	0.479559	1.94e-06	16	298	l
328	86	26	4.84019	0.392282	3.86247	5.36328	131.979	649.097	11.575	0.349087	-0.371589	0.0391388	5.78912	0.651385	9.30302	0.450997	26.2585	655.457	1.1979	1.6936	5.78912	0.758157	0.171508	0.521715	0.0373456	10.7288	0.206168	7.75761	0.341597	25.3729	604.703	1.1159	1.56129	10.7288	0.822962	0.160499	0.488352	1.81e-06	14	598	l
329	66	24	4.133	0.499931	3.16913	5.01266	83.7619	746.192	11.0894	0.646625	1.54457	0.0387603	6.56364	0.534209	8.04568	0.42927	25.3	604.248	1.16229	1.6761	6.56364	0.771217	0.136188	0.466103	0.0412328	14.8571	0.102772	9.27947	0.351278	25.6735	622.137	1.09957	1.51493	14.8571	0.872656	0.149322	0.465699	8.65e-07	4	92	l
330	56	23	3.7586	0.600554	2.44756	4.73095	32.629	692.441	9.9403	0.546558	0.111606	0.0271706	8.82967	0.499344	9.8181	0.389553	26.8846	684.239	1.23708	1.79865	8.82967	0.830773	0.159549	0.517599	0.0371094	16.7188	0.109609	10.3884	0.277001	26.0938	646.257	1.08531	1.50727	16.7188	0.892559	0.163438	0.485074	9.95e-07	7	179	l
331	112	35	5.6438	1.58015	2.4247	7.92604	41.6902	708.841	17.5648	0.852276	-0.994406	0.0337626	6.08333	0.547801	7.72639	0.429755	29.3073	812.078	1.17803	1.68896	6.08333	0.764743	0.115177	0.431863	0.0442965	11.5769	0.0962295	7.40479	0.369871	28.7821	781.238	1.08375	1.52654	11.5769	0.875806	0.101016	0.387177	9.76e-07	11	154	l
332	85	28	4.74406	0.353996	4.13747	5.46849	289.47	702.226	11.6605	0.461731	-0.717374	0.0430737	8.20345	0.474702	8.80838	0.447395	25.969	638.536	1.15958	1.66351	8.20345	0.811011	0.108297	0.416445	0.0459504	15.6545	0.0306138	9.07446	0.389838	25.5818	618.737	1.04422	1.46351	15.6545	0.828831	0.1312	0.430992	1.47e-06	12	108	l
333	87	28	4.79655	0.251485	4.33027	5.17906	325.621	704.465	11.043	0.0580326	1.056	0.0379093	6.31879	0.444851	6.69108	0.430381	25.3389	602.308	1.13433	1.69665	6.31879	0.755042	0.111162	0.425471	0.0690893	6.57627	0.0454508	4.4447	0.443862	25.1864	595.206	0.937667	1.3653	6.57627	0.742014	0.0892601	0.346062	1.38e-06	10	119	l
334	46	20	3.38195	0.466242	2.499	4.18868	359.267	681.847	9.1004	0.621595	-1.15105	0.0806377	7.58503	0.302616	6.43821	0.469224	25.0952	591.858	1.06006	1.46689	7.58503	0.779234	0.105548	0.388322	0.0813609	10.1154	-0.0012446	6.05141	0.440997	25.4231	610.724	0.915249	1.2106	10.1154	0.771824	0.12506	0.386174	1.54e-06	13	70	l
335	89	29	4.8924	0.688076	3.56292	6.18713	422.525	686.411	12.7233	0.568628	0.734472	0.0191158	6.9637	0.628169	10.3641	0.398254	25.5908	621.941	1.27105	1.86939	6.9637	0.775996	0.150188	0.511674	0.0380658	10.6111	0.143201	7.1923	0.377403	23.9074	535.727	1.06952	1.5512	10.6111	0.817022	0.176731	0.509621	1.52e-06	11	1895	l
336	168	50	7.19003	1.82251	4.15235	10.5812	390.08	710.149	21.2147	0.84431	1.34552	0.0276412	4.68376	0.648309	7.65891	0.50301	27.6957	722.648	1.22505	1.75698	4.68376	0.704568	0.157433	0.509273	0.0214359	8.26515	0.400867	7.8976	0.353285	28.0227	739.409	1.18835	1.79767	8.26515	0.79405	0.121452	0.45542	1.28e-06	11	1508	l
337	81	29	4.64074	0.499503	3.5341	5.95444	381.453	720.345	11.2824	0.372101	-1.10339	0.0354604	7.52206	0.495239	8.45111	0.410165	25.1838	598.604	1.17712	1.73833	7.52206	0.794722	0.126719	0.45779	0.0408264	17.5273	0.0492756	10.2179	0.339864	25.2364	602.187	1.09421	1.49867	17.5273	0.880191	0.11973	0.416837	1.16e-06	9	1508	l
338	111	32	5.48164	0.351374	4.92602	6.2061	467.931	665.355	13.0405	0.384028	-1.51063	0.0237466	4.86563	0.605577	7.16803	0.44425	24.5969	566.801	1.20898	1.76885	4.86563	0.717089	0.146929	0.494567	0.0342971	8.97619	0.288663	7.30938	0.335396	24.6905	571.659	1.1236	1.57237	8.97619	0.801667	0.146034	0.468413	1.71e-06	7	144	l
339	90	28	4.938	0.533387	3.61191	5.64828	490.506	638.543	12.7041	0.601476	-1.26994	0.0290363	7.09091	0.494693	8.01643	0.399628	24.2532	552.252	1.20379	1.75274	7.09091	0.787238	0.121899	0.451106	0.024974	14.8065	0.0591775	8.86889	0.262229	23.4839	515.375	1.15215	1.70194	14.8065	0.881928	0.143623	0.481173	1.81e-06	9	406	l
340	139	38	6.55051	1.81924	3.43237	9.32411	546.169	602.831	19.9802	0.874386	-0.565	0.0279408	5.7716	0.527857	7.11214	0.436701	23.9979	539.16	1.18385	1.73783	5.7716	0.746615	0.110124	0.428179	0.0234921	8.5619	0.215861	6.45943	0.339694	24.3524	551.916	1.14376	1.72282	8.5619	0.812361	0.112882	0.431572	1.91e-06	13	180	l
341	60	23	3.9207	0.359209	3.19972	4.48901	530.326	617.152	9.9597	0.512647	-1.39675	0.0520993	9.59596	0.249207	7.39055	0.410859	22.6768	482.104	1.08654	1.62652	9.59596	0.829042	0.0923338	0.381683	0.0328731	11.7436	0.0892311	7.44707	0.302367	22.8205	486.32	1.08863	1.57281	11.7436	0.791933	0.168845	0.501769	1.88e-06	12	83	l
342	63	24	4.00979	0.379178	3.16667	4.54911	550.341	663.949	10.1651	0.500084	1.3481	0.0297269	6.89474	0.478945	7.61613	0.424871	23.6411	523.901	1.18384	1.70202	6.89474	0.786309	0.145525	0.48417	0.0677438	10.881	-0.0610575	6.12741	0.387895	23.4524	515.453	0.961839	1.37228	10.881	0.844733	0.124247	0.40771	1.85e-06	14	174	l
343	104	35	5.43886	1.37769	2.67917	7.32165	549.491	678.094	16.2674	0.817884	-0.415799	0.0248457	6.73654	0.50663	7.82707	0.432851	24.0227	540.757	1.21509	1.78708	6.73654	0.766626	0.124827	0.460151	0.0256574	10.2838	0.125308	6.87852	0.348317	23.7162	525.422	1.08456	1.7057	10.2838	0.845736	0.13654	0.470286	1.8e-06	18	320	l
344	84	31	4.9142	1.24288	2.72671	7.26788	548.999	688.348	14.5731	0.79423	0.887036	0.0268608	7.54874	0.472579	8.15627	0.399439	24.4368	561.329	1.19349	1.77188	7.54874	0.796185	0.123222	0.455614	0.0546875	10.25	0.000746083	6.12883	0.357994	24.3571	556.814	0.978759	1.38104	10.25	0.803897	0.0835986	0.336917	1.75e-06	20	320	l
345	72	25	4.36924	0.503734	3.48368	5.37922	565.068	682.886	11.5347	0.638016	-1.01612	0.0415272	8.37603	0.355911	7.50223	0.410678	23.4256	515.371	1.11556	1.67162	8.37603	0.805329	0.0969769	0.395786	0.076843	11.551	0.00794105	6.82174	0.384378	23.7551	530.991	0.96794	1.25993	11.551	0.809977	0.0854966	0.326236	1.78e-06	16	93	l
346	68	27	4.22822	0.756373	2.60947	5.8968	541.455	691.299	11.943	0.72688	-1.32768	0.0438257	8.02232	0.497159	8.977	0.45471	24.4152	563.872	1.17758	1.66617	8.02232	0.795785	0.1403	0.471475	0.0540166	4.81579	0.469868	5.54207	0.413798	23.4474	518.054	0.981812	1.39354	4.81579	0.681319	0.209359	0.527348	1.73e-06	18	320	l
347	74	26	4.45956	0.785348	3.08772	5.75755	533.027	701.71	12.4881	0.74262	1.10881	0.0463385	9.34274	0.334929	8.02386	0.400684	24.7137	574.41	1.14133	1.67996	9.34274	0.831183	0.0771438	0.355116	0.0292562	18.2182	0.0417652	10.5061	0.276941	25.7091	621.823	1.17306	1.67313	18.2182	0.958725	0.193834	0.549277	1.65e-06	20	192	l
348	82	27	4.65554	0.290747	4.05754	5.15866	573.331	701.548	11.39	0.429435	0.921199	0.0346219	7.91398	0.458258	8.3042	0.40102	24.043	544.418	1.17129	1.73156	7.91398	0.788281	0.11575	0.43776	0.0277148	15.5714	0.133423	9.98444	0.321745	24.3968	560.466	1.15677	1.66068	15.5714	0.924436	0.181857	0.531663	1.65e-06	18	294	l
349	66	23	4.16767	0.362627	3.44824	4.798	515.546	723.745	10.2897	0.48271	-0.390076	0.0339669	8.44545	0.35044	7.50091	0.401599	25.6	616.161	1.13363	1.63372	8.44545	0.813047	0.102244	0.401762	0.0349716	13.8261	0.0092787	7.97779	0.314711	26.0435	637.416	1.07689	1.53591	13.8261	0.883696	0.136897	0.4495	1.41e-06	15	94	l
350	68	25	4.18744	0.336694	3.42812	4.76151	535.094	733.928	9.94967	0.277903	-0.958432	0.0324186	5.4978	0.516469	6.68505	0.405577	25.304	601.082	1.1412	1.70491	5.4978	0.733448	0.132274	0.463185	0.0503308	9.56522	0.141645	6.57183	0.375373	25.1304	594.055	1.0196	1.50948	9.56522	0.789751	0.148685	0.464012	1.32e-06	15	255	l
351	69	25	4.22319	0.364291	3.14197	4.84066	538.902	748.861	10.5335	0.460262	0.900432	0.036225	8.01732	0.406003	7.74862	0.411891	23.368	512.933	1.14285	1.68763	8.01732	0.806704	0.113777	0.429195	0.0216837	18.75	0.0376747	10.742	0.239155	24.8214	578.79	1.18731	1.71978	18.75	0.950229	0.14481	0.485242	1.12e-06	12	92	l
352	65	23	4.12763	0.513032	3.29088	5.29597	550.607	742.3	10.914	0.638677	1.37059	0.0413237	7.55093	0.329235	6.6286	0.416708	23.3657	511.159	1.0903	1.64287	7.55093	0.777621	0.0909619	0.380683	0.0555556	7.71795	-0.0234079	4.77071	0.35601	22.3846	466.917	0.947446	1.3466	7.71795	0.770622	0.0630026	0.289606	1.21e-06	15	207	l
353	88	30	4.83137	0.626367	3.78139	5.93567	555.543	733.371	12.3295	0.55408	-0.11154	0.027276	6.08027	0.653988	9.78621	0.429734	26.4615	666.116	1.22165	1.77572	6.08027	0.75563	0.165308	0.5233	0.0277253	13.4348	0.249864	9.95489	0.314516	26.8551	683.308	1.14665	1.65786	13.4348	0.875375	0.135255	0.462347	1.33e-06	16	207	l
354	52	22	3.58578	0.345618	3.04138	4.03113	562.612	745.933	8.98016	0.47774	-0.0962481	0.0410525	4.47929	0.449974	5.07189	0.448717	25.4379	604.134	1.10012	1.56808	4.47929	0.678811	0.109627	0.407789	0.0339506	9.5	0.0158273	5.82639	0.25157	25.1667	591.716	1.04385	1.52695	9.5	0.794583	0.149597	0.467736	1.16e-06	12	79	l
355	44	19	3.3033	0.344542	2.65985	3.82802	573.321	743.701	8.17726	0.488234	0.339031	0.0372449	3.33571	0.441194	3.98468	0.448639	30.4357	873.12	1.03304	1.51837	3.33571	0.619575	0.111632	0.405374	0.0463734	6.37931	0.0468153	4.34631	0.353171	30.4483	877.031	0.952087	1.38066	6.37931	0.727648	0.139576	0.432566	1.17e-06	11	88	l
356	164	43	6.78403	1.34468	3.86474	8.87937	574.675	568.695	18.4275	0.731649	-1.03774	0.0303448	5.96207	0.595153	8.36337	0.446826	24.9586	586.503	1.23075	1.78889	5.96207	0.753242	0.148473	0.499413	0.0273998	12.3889	0.194588	8.69103	0.310495	24.7222	573.444	1.16232	1.73424	12.3889	0.890894	0.110422	0.428332	1.95e-06	11	198	l
357	73	25	4.37655	0.278902	3.85331	4.82162	628.028	557.655	10.8582	0.435415	-1.29743	0.0308431	12.4146	0.402581	11.3902	0.375465	23.9919	548.563	1.20114	1.79984	12.4146	0.876723	0.102547	0.420462	0.0345689	21	0.0717185	12.3112	0.341604	23.5714	526.241	1.16616	1.57712	21	0.922203	0.117986	0.423579	1.87e-06	13	83	l
358	69	24	4.26464	0.477257	3.4098	5.15203	640.747	580.74	10.9419	0.592712	1.02369	0.0426341	8.60173	0.232237	6.60181	0.413897	24.1602	545.624	1.09898	1.67117	8.60173	0.796798	0.0866723	0.374835	0.0545606	12.9388	0.101983	8.20408	0.39565	25.4286	612.285	1.00711	1.41618	12.9388	0.850106	0.131219	0.424675	1.81e-06	14	88	l
359	79	26	4.58424	0.410062	3.65445	5.21548	631.762	596.123	11.571	0.53523	-0.755711	0.0315841	6.3209	0.539284	7.85987	0.425559	23.6642	526.246	1.18914	1.73837	6.3209	0.754862	0.139416	0.478901	0.041605	10.1731	0.125495	6.81648	0.313636	22.5577	474.965	1.06649	1.50763	10.1731	0.787821	0.17567	0.501994	1.82e-06	15	107	l
360	92	28	4.97951	0.468809	4.01591	5.7183	605.971	616.779	12.3784	0.532656	0.960591	0.0537224	5.69937	0.449516	6.17669	0.490638	25.4082	607.047	1.07636	1.55503	5.69937	0.738066	0.110017	0.406937	0.0799948	8.69355	0.0754589	5.70155	0.519398	25.0161	590.82	0.918263	1.27052	8.69355	0.739238	0.192865	0.48737	1.87e-06	16	263	l
361	74	26	4.39664	0.470441	3.37783	5.10902	599.459	636.44	10.927	0.451405	-0.20911	0.040451	7.94378	0.429868	7.96661	0.430743	24.1928	551.77	1.13095	1.6801	7.94378	0.799699	0.118417	0.436588	0.0644444	10	0.0258803	6.13284	0.438544	23.1556	503.646	0.949371	1.36604	10	0.733679	0.148375	0.443419	1.87e-06	15	319	l
362	91	30	4.93435	0.970663	3.52278	6.57343	643.46	619.369	14.3676	0.783072	-0.115456	0.0281325	5.54019	0.652056	8.96132	0.423154	25.6688	623.801	1.22508	1.77544	5.54019	0.737246	0.149382	0.499208	0.0350296	11.1231	0.169912	7.69994	0.335232	25.2154	596.596	1.11311	1.61776	11.1231	0.867865	0.175086	0.516587	1.79e-06	16	352	l
363	82	26	4.73191	0.528307	3.6877	5.57321	668.43	625.018	12.4367	0.662515	0.935108	0.0603281	7.29032	0.40818	7.15923	0.462542	24.9319	586.02	1.08503	1.5548	7.29032	0.778513	0.0907765	0.370729	0.0448023	10.1429	0.0686343	6.44515	0.404624	24.9286	582.313	1.03976	1.4847	10.1429	0.819504	0.108104	0.395043	1.71e-06	15	101	l
364	83	27	4.68778	0.419066	3.85826	5.34695	650.014	631.879	11.893	0.552755	0.149407	0.0285432	6.77032	0.509918	7.90733	0.394081	23.9435	538.815	1.18482	1.74224	6.77032	0.772614	0.118387	0.443698	0.042889	8.32143	0.282091	6.7956	0.38557	23.8214	532.831	1.06247	1.48503	8.32143	0.800301	0.115572	0.408077	1.76e-06	14	170	l
365	66	23	4.15702	0.223526	3.83004	4.55589	653.196	651.058	10.0929	0.374248	-0.895991	0.0342233	8.79186	0.423976	8.6315	0.418661	23.4977	521.031	1.15279	1.72701	8.79186	0.821909	0.144608	0.485812	0.0250979	23.1132	0.0668276	13.3842	0.277509	25.3774	611.465	1.18973	1.70366	23.1132	0.966226	0.189375	0.547532	1.71e-06	16	84	l
366	56	21	3.80581	0.382341	3.00604	4.30814	664.18	652.838	9.39443	0.451834	1.3746	0.0274102	7.1087	0.356268	6.52147	0.364202	24.5326	562.104	1.14186	1.72413	7.1087	0.769431	0.0906757	0.388659	0.053272	15.8605	-0.0683424	8.42293	0.340156	26.5116	663.252	1.02788	1.37417	15.8605	0.85515	0.0585837	0.282112	1.67e-06	15	82	l
367	64	26	4.20041	1.27274	2.17639	6.07376	611.494	674.355	14.1894	0.8855	1.16476	0.0240847	10.2548	0.378486	9.24986	0.354013	24.101	547.767	1.18759	1.82019	10.2548	0.857226	0.109324	0.43568	0.0305571	25.0465	-0.00991135	13.4004	0.218425	24.1628	553.109	1.17248	1.60806	25.0465	0.981294	0.119297	0.429584	1.75e-06	14	84	l
368	70	26	4.26136	0.602504	3.04721	5.20881	646.907	681.611	10.9941	0.5303	1.32762	0.0320231	8.55794	0.489669	9.3847	0.398425	24.2403	556.369	1.18849	1.78054	8.55794	0.829502	0.138465	0.482393	0.0338542	18.1042	0.0421494	10.4504	0.328802	24.2708	557.038	1.09023	1.54468	18.1042	0.931929	0.171633	0.501738	1.59e-06	16	122	l
369	80	25	4.64919	0.350247	3.98276	5.36492	628.123	698.732	11.3852	0.455234	-0.255626	0.0244445	8.53676	0.487334	9.32585	0.396064	24.5735	570.936	1.20326	1.78717	8.53676	0.815637	0.11949	0.450747	0.0406569	14.6607	0.213649	10.322	0.32977	24.625	576.591	1.08856	1.51817	14.6607	0.899995	0.122152	0.423354	1.52e-06	11	116	l
370	87	28	4.82183	0.669103	3.68134	6.09292	648.231	694.713	13.1484	0.693022	-0.25637	0.0331089	7.02357	0.527866	8.43811	0.430751	24.7946	580.179	1.18423	1.75895	7.02357	0.777673	0.116772	0.442697	0.0261708	15.3485	0.173261	10.2825	0.318473	24.7727	578.476	1.17836	1.67799	15.3485	0.923872	0.159217	0.501937	1.49e-06	15	116	l
371	78	27	4.60515	0.863705	3.04448	5.98535	636.901	724.186	12.9553	0.752485	-0.922566	0.0334407	5.77481	0.470299	6.451	0.445942	26.416	654.929	1.13956	1.70377	5.77481	0.734402	0.114005	0.431452	0.0334423	10.7759	0.19924	7.72852	0.351801	27.2931	702.147	1.10133	1.58613	10.7759	0.856627	0.171211	0.506897	1.22e-06	9	119	l
372	80	27	4.61925	0.565288	3.56037	5.78074	653.243	716.144	12.2191	0.637529	-1.09402	0.0266064	6.26937	0.544654	7.88418	0.395451	23.8856	536.43	1.18842	1.76482	6.26937	0.760143	0.115798	0.441597	0.039282	13.129	0.119724	8.45734	0.31955	25.0968	591.632	1.11903	1.53985	13.129	0.898012	0.1228	0.427161	1.25e-06	9	115	l
373	79	28	4.57649	0.876772	2.94616	5.71038	698.642	646.474	13.1695	0.754777	0.0227712	0.037912	8.79699	0.430809	8.72763	0.419853	24.4662	565.089	1.16433	1.68049	8.79699	0.812326	0.101218	0.405006	0.0543802	16.6909	0.0217391	9.53091	0.353807	24.8	581.465	1.05064	1.42885	16.6909	0.892396	0.077235	0.329312	1.58e-06	12	114	l
374	133	44	6.37052	2.47617	1.24814	10.1046	722.27	657.311	22.2392	0.914495	-1.15557	0.0178745	7.94923	0.526288	9.39035	0.355434	25.4547	610.972	1.26054	1.90481	7.94923	0.809791	0.0988978	0.424004	0.0217588	15.8182	-0.00386809	8.87862	0.262285	24.5909	564.438	1.16567	1.79811	15.8182	0.930065	0.137551	0.482962	1.48e-06	12	286	l
375	88	27	4.87725	0.535283	4.01386	5.75423	757.357	666.127	12.3853	0.583428	0.194593	0.0493262	4.99336	0.541715	6.44787	0.474266	25.5581	613.229	1.1362	1.62912	4.99336	0.72261	0.151428	0.483997	0.067034	8.84848	0.223404	6.69697	0.426276	26	637.038	1.03807	1.41188	8.84848	0.802851	0.107229	0.384489	1.36e-06	12	136	l
376	73	25	4.3753	0.356562	3.59578	4.97691	727.051	738.571	11.1481	0.550809	-1.20067	0.0329747	6.60976	0.536398	8.12869	0.438929	24.1951	551.632	1.17932	1.69517	6.60976	0.770166	0.133828	0.464576	0.033284	13.5385	0.130988	8.78957	0.348497	23.7308	529.972	1.09557	1.57568	13.5385	0.869571	0.150991	0.476337	8e-07	4	101	l
377	68	25	4.2223	0.556561	3.33802	5.25951	746.338	609.592	11.3289	0.665349	0.394032	0.0490986	5.67401	0.41774	5.8724	0.454218	22.2643	462.959	1.07132	1.56277	5.67401	0.735327	0.103585	0.396161	0.0689981	11.0217	0.085035	7.02304	0.421086	21.8043	447.495	0.961499	1.31233	11.0217	0.842123	0.12082	0.394056	1.54e-06	12	100	l
378	92	28	4.97951	0.468809	4.01591	5.7183	605.971	616.779	12.3784	0.532656	0.960591	0.0537224	5.69937	0.449516	6.17669	0.490638	25.4082	607.047	1.07636	1.55503	5.69937	0.738066	0.110017	0.406937	0.0799948	8.69355	0.0754589	5.70155	0.519398	25.0161	590.82	0.918263	1.27052	8.69355	0.739238	0.192865	0.48737	1.87e-06	16	263	l
379	79	26	4.58264	0.327658	3.864	5.15227	766.546	628.748	11.3459	0.475866	-0.977846	0.0446995	7.35448	0.567172	9.49585	0.446908	23.459	523.697	1.16394	1.64639	7.35448	0.792381	0.137022	0.463775	0.0448558	9.60377	0.314687	8.00685	0.369829	22.6226	484.115	1.04275	1.45194	9.60377	0.787724	0.175245	0.493326	1.46e-06	12	158	l
380	72	24	4.37984	0.479795	3.24091	5.0501	801.245	624.407	11.0824	0.5098	-0.851018	0.0236152	9.70661	0.500293	10.7123	0.354792	24.5	571.131	1.21936	1.84812	9.70661	0.840081	0.144329	0.499852	0.0318617	19.3469	0.123117	12.0317	0.321175	24.5306	571.569	1.14709	1.60121	19.3469	0.9211	0.154049	0.484272	1.35e-06	11	183	l
381	71	24	4.33975	0.405986	3.6688	5.15203	810.689	621.663	11.085	0.540685	0.97185	0.0248858	11.0126	0.466426	11.3196	0.369678	24.2092	557.993	1.2369	1.82491	11.0126	0.863545	0.118894	0.453882	0.0279459	23.1698	0.189166	15.2876	0.299279	25.0189	604.742	1.12826	1.66958	23.1698	0.933461	0.124853	0.446486	1.31e-06	10	183	l
382	71	24	4.39475	0.648484	2.98172	5.25744	818.646	615.54	12.205	0.723967	0.807092	0.0319628	8.29412	0.474382	8.88987	0.400844	23.1092	503.643	1.19172	1.76515	8.29412	0.810816	0.134275	0.473671	0.0581008	16.5714	-0.0490956	8.89796	0.337092	22.8571	490.554	1.05042	1.37826	16.5714	0.900624	0.128898	0.415876	1.28e-06	10	96	l
383	66	24	4.14578	0.533631	3.2059	4.99444	906.248	687.29	10.864	0.623221	1.2788	0.0331612	8.35909	0.442862	8.50181	0.410619	24.6045	570.75	1.17163	1.66206	8.35909	0.791612	0.114423	0.427405	0.0352079	13.087	0.183705	9.01607	0.305459	25.3913	608.144	1.11856	1.57101	13.087	0.873816	0.153212	0.479022	5.94e-07	6	97	l
384	60	26	3.93678	0.68065	2.66747	5.01153	696.133	416.395	10.2593	0.504194	1.52761	0.0264757	8.92188	0.528886	10.4689	0.378359	27.4323	717.181	1.1982	1.69958	8.92188	0.817393	0.125818	0.451696	0.0301247	19.6053	0.0111598	10.9133	0.261907	27.2895	703.001	1.15609	1.57575	19.6053	0.926204	0.134028	0.45008	1.93e-06	15	7703	l
385	63	23	4.04864	0.470084	3.1479	4.88526	863.521	324.401	10.6905	0.629519	1.38004	0.0273918	9.83254	0.296775	7.99103	0.366427	23.4402	515.436	1.13987	1.73282	9.83254	0.831471	0.085702	0.3791	0.029195	17.4048	0.083454	10.4948	0.290671	23.4048	518.119	1.09906	1.6177	17.4048	0.878028	0.171486	0.511584	1.29e-06	12	87	l
386	72	25	4.36218	0.636418	2.92684	5.31097	832.996	311.689	11.9521	0.667253	-1.36004	0.0359068	10.722	0.466188	11.0429	0.410795	24.3568	565.768	1.19829	1.7261	10.722	0.829856	0.145459	0.48704	0.0393861	27.4615	0.121418	16.6283	0.345375	25.5769	634.951	1.08408	1.53006	27.4615	0.920027	0.184316	0.516745	1.58e-06	15	85	l
387	68	24	4.20274	0.208703	3.64029	4.50944	735.986	306.151	9.80411	0.214125	-0.355176	0.0422341	6.01316	0.460001	6.56775	0.464321	26.136	641.696	1.12721	1.63048	6.01316	0.752678	0.140951	0.468026	0.0498866	9.69048	-0.0052042	5.82015	0.375578	25.0714	589.397	0.99224	1.40781	9.69048	0.802374	0.114984	0.397253	1.89e-06	17	221	l
388	56	24	3.81013	0.987915	2.41667	5.24471	772.439	286.981	11.783	0.830418	-1.47273	0.0503648	7.39227	0.257656	5.979	0.450774	22.7403	483.865	1.02993	1.52774	7.39227	0.779366	0.0976537	0.381007	0.0509886	12.6452	-0.12	6.64516	0.298452	22	451.723	0.981268	1.39169	12.6452	0.834042	0.128287	0.416748	1.85e-06	14	82	l
389	64	23	4.07945	0.276514	3.4102	4.61321	745.838	268.129	10.0273	0.417168	0.843473	0.0314863	6.82629	0.491897	7.71743	0.407576	24.4977	564.08	1.17306	1.70685	6.82629	0.775249	0.147665	0.488105	0.0332018	12.9744	-0.0259956	7.32281	0.300868	23.7949	528.743	1.06985	1.55043	12.9744	0.871731	0.111329	0.408718	1.86e-06	14	281	l
390	70	25	4.28558	0.377578	3.82769	5.03698	764.794	181.974	10.9768	0.565152	-0.817366	0.0269353	7.04255	0.540838	8.66892	0.408592	25.8511	630.239	1.22169	1.77005	7.04255	0.783308	0.148174	0.496665	0.0251978	17.2245	0.0739397	10.2999	0.244708	25.6735	620.579	1.16626	1.67656	17.2245	0.88019	0.139403	0.471333	1.82e-06	14	93	l
391	106	34	5.48455	1.42796	3.24464	7.81767	779.28	194.437	17.3953	0.855298	1.45324	0.0258615	6.82044	0.692185	12.0788	0.437769	26.2569	661.451	1.27779	1.8268	6.82044	0.77812	0.2033	0.581902	0.0443582	13.3117	0.416807	12.4128	0.363075	26.2987	661.706	1.21151	1.62439	13.3117	0.903487	0.213354	0.567061	1.84e-06	16	342	l
392	177	55	8.5511	3.78705	2.09557	14.5349	595.751	25.0935	32.2184	0.970106	-0.822042	0.0332448	2.28336	0.639218	4.16446	0.538867	33.4728	1059.19	1.08736	1.55064	2.28336	0.57588	0.141443	0.458512	0.0302338	4.61475	0.257846	4.10903	0.413801	33.4508	1059.11	1.02718	1.60052	4.61475	0.69207	0.0770305	0.346911	7.19e-07	6	534	s
393	98	29	5.16858	0.533489	4.18962	6.02591	616.673	36.5822	12.1118	0.423141	-1.30697	0.0420285	3.7426	0.42988	4.2823	0.494608	29.3935	811.035	1.08009	1.56016	3.7426	0.667992	0.084698	0.359011	0.0486242	4.53623	0.246612	4.01055	0.412624	29.1739	800.865	1.00728	1.43259	4.53623	0.692582	0.127389	0.420824	8.38e-07	7	127	s
394	122	46	6.33609	2.59278	0.978502	10.7986	643.484	31.822	23.3801	0.919715	-0.311106	0.015648	6.44059	0.548271	8.12883	0.398766	29.2624	806.595	1.2531	1.89355	6.44059	0.7622	0.122006	0.467015	0.0214063	14.4	0.0907476	8.91859	0.28815	29.275	806.501	1.18182	1.76704	14.4	0.890352	0.146985	0.494435	8.29e-07	9	190	s
395	57	23	3.81399	0.669166	2.58869	4.90842	658.348	18.5387	10.7152	0.712154	-0.096478	0.02772	7.8172	0.437124	7.94398	0.391391	26.7097	671.704	1.18037	1.73777	7.8172	0.798825	0.107254	0.422804	0.0314286	13.9143	0.0603897	8.40429	0.288849	25.8	626.581	1.08406	1.56759	13.9143	0.86779	0.193675	0.534312	7.36e-07	7	71	s
396	123	40	6.04975	1.98696	2.95	9.06104	671.159	28.1076	19.9018	0.900617	0.00206861	0.0243565	4.6872	0.588776	6.69909	0.452511	30.1943	859.75	1.18326	1.73578	4.6872	0.70421	0.119965	0.445758	0.0264721	7.82955	0.380595	7.32022	0.39767	30.4432	875.33	1.15362	1.65417	7.82955	0.790151	0.14673	0.480039	8.39e-07	7	165	s
397	108	38	5.76823	2.08286	1.88337	8.95425	696.83	27.7644	19.5933	0.919455	-0.296656	0.0343331	2.70604	0.489608	3.65095	0.500123	34.1676	1105.32	1.04029	1.53174	2.70604	0.599262	0.0952639	0.376905	0.0361246	5.76471	-0.0592574	3.72111	0.381569	34.4706	1129.39	0.940519	1.52248	5.76471	0.729147	0.0683045	0.319493	8.85e-07	5	296	s
398	83	27	4.72445	0.650453	3.22563	5.67296	745.182	12.8757	12.361	0.650132	-0.505156	0.0196167	5.80851	0.734994	11.9592	0.396872	31	920.625	1.29147	1.83832	5.80851	0.745832	0.199771	0.578808	0.0224793	16.7091	0.305343	13.0269	0.262752	29.7273	844.007	1.22098	1.72597	16.7091	0.944881	0.171247	0.525551	8.5e-07	7	162	s
399	41	18	3.20329	0.522386	1.84675	3.92562	747.875	37.5033	8.81784	0.67517	-1.09022	0.0249084	6.71318	0.397827	6.57412	0.373953	30.4961	876.437	1.15582	1.68542	6.71318	0.764031	0.12357	0.446175	0.0498615	9.84211	-0.134238	5.33864	0.301839	29.5263	822.313	0.981607	1.33017	9.84211	0.775329	0.237451	0.548823	1.11e-06	9	78	s
400	53	22	3.66012	0.56973	2.68951	4.67652	788.713	25.7984	10.2116	0.692294	-0.286705	0.0226136	7.38372	0.53673	8.96914	0.383616	29.1744	806.361	1.21251	1.77731	7.38372	0.793285	0.137259	0.480035	0.0354938	18.0556	0.0288039	10.2955	0.263243	29.6111	832.819	1.08582	1.49982	18.0556	0.862799	0.160851	0.480371	1.06e-06	12	391	s
401	106	32	5.34781	0.601589	3.81301	6.5222	806.933	27.9853	13.6924	0.562663	0.989433	0.0247656	7.83607	0.623799	11.4147	0.424893	25.8852	639.017	1.28455	1.87438	7.83607	0.789857	0.1507	0.513065	0.0468161	10.0704	0.374727	9.05282	0.395286	25	594.203	1.08218	1.50266	10.0704	0.838643	0.156029	0.473855	1.08e-06	12	146	s
402	105	36	5.7054	2.00697	2.32223	8.65085	817.093	19.6235	19.1443	0.910666	1.04601	0.0344968	2.49435	0.52337	3.61666	0.511717	34.2853	1112.78	1.0466	1.52259	2.49435	0.582732	0.104322	0.392799	0.0358064	4.05634	0.20824	3.56159	0.393997	34.0845	1101.28	0.992397	1.50928	4.05634	0.652338	0.0849266	0.353963	9.73e-07	11	395	s
403	110	32	5.47545	0.562473	4.08695	6.49639	839.482	11.2138	13.8213	0.578252	0.00526937	0.0223061	6.13613	0.637035	9.45277	0.442554	26.0209	641.359	1.24829	1.81981	6.13613	0.757569	0.17486	0.54258	0.0237141	9.68354	0.356968	8.5296	0.374309	25.6329	618.465	1.17826	1.74265	9.68354	0.837866	0.124977	0.4553	8.16e-07	8	131	s
404	100	31	5.2715	0.838119	3.88452	7.02249	850.655	28.7017	14.1717	0.734391	0.415628	0.0208812	5.00872	0.730383	10.2886	0.457113	30.6308	894.396	1.26671	1.82999	5.00872	0.707459	0.196111	0.572948	0.0285494	10.9444	0.405532	10.2052	0.332958	30.1111	863.864	1.16309	1.6477	10.9444	0.839573	0.152938	0.488674	9.5e-07	10	135	s
405	63	26	4.08199	1.11475	1.80237	5.77948	831.271	37.6375	12.3102	0.813984	0.521669	0.0427119	3.18627	0.36727	3.51788	0.485085	33.6471	1072.23	1.00748	1.50405	3.18627	0.629251	0.0831916	0.349845	0.0385488	6.38095	-0.0839753	3.94331	0.314501	33.5238	1068.48	0.918834	1.46647	6.38095	0.706611	0.132218	0.432994	1.13e-06	13	395	s
406	100	31	5.2715	0.838119	3.88452	7.02249	850.655	28.7017	14.1717	0.734391	0.415628	0.0208812	5.00872	0.730383	10.2886	0.457113	30.6308	894.396	1.26671	1.82999	5.00872	0.707459	0.196111	0.572948	0.0285494	10.9444	0.405532	10.2052	0.332958	30.1111	863.864	1.16309	1.6477	10.9444	0.839573	0.152938	0.488674	9.5e-07	10	135	s
407	139	42	6.52826	2.09194	3.53297	9.8564	864.891	45.0285	21.2873	0.909474	-0.334148	0.0330444	2.91079	0.640244	5.0455	0.508283	31.8859	957.738	1.15372	1.63137	2.91079	0.623603	0.153902	0.488004	0.02715	6.67	0.25624	5.48398	0.346052	31.71	947.721	1.10845	1.67724	6.67	0.756706	0.0768245	0.354134	1.01e-06	9	278	s
408	102	36	5.40392	1.56663	2.66334	8.00583	877.713	25.6122	17.669	0.873525	-1.36682	0.0190674	7.34783	0.637919	11.1467	0.399977	26.913	689.748	1.29061	1.89717	7.34783	0.795568	0.172943	0.549306	0.0221186	10.6761	0.426944	10.315	0.277745	26.5634	670.166	1.19446	1.73281	10.6761	0.82215	0.214411	0.583453	7.51e-07	7	129	s
409	132	38	6.07761	1.3019	2.90632	8.01803	897.024	27.0012	16.7068	0.723536	0.06734	0.0162193	5.73478	0.676552	9.86508	0.409657	28.4478	766.749	1.29964	1.89981	5.73478	0.749049	0.151585	0.517422	0.0174406	12.6327	0.17246	8.63265	0.287839	28	736.666	1.19015	1.83685	12.6327	0.878816	0.110617	0.439915	6.21e-07	4	195	s
410	153	39	6.78456	1.44321	4.17437	9.46463	597.32	49.7086	18.5144	0.808682	-0.967177	0.0750151	1.10351	0.666603	2.65495	0.67397	33.8244	1085.12	0.967032	1.26956	1.10351	0.459702	0.216971	0.51556	0.0792848	1.84553	0.489771	2.80853	0.639646	33.9593	1096.9	0.921318	1.27243	1.84553	0.543402	0.160177	0.445792	9.28e-07	8	225	s
411	43	20	3.27349	0.729209	1.84459	4.28981	605.01	66.352	9.76304	0.795407	-0.21881	0.033251	5.04444	0.436709	5.47765	0.409748	29.3111	809.484	1.08669	1.61187	5.04444	0.714838	0.124184	0.438387	0.0376	8.52	-0.225688	4.4756	0.214027	29.24	806.166	0.941888	1.46405	8.52	0.672281	0.200292	0.527354	1.06e-06	10	118	s
412	90	30	5.33945	1.70954	2.51683	7.88677	651.734	60.2554	17.5112	0.907304	-0.917459	0.0330742	7.43377	0.490595	8.29653	0.427549	26.6192	668.145	1.19496	1.75949	7.43377	0.800809	0.102183	0.415455	0.0457786	17.3881	0.0523683	10.1745	0.313813	27.0597	691.521	1.13266	1.56691	17.3881	0.945234	0.146524	0.46844	1.06e-06	9	145	s
413	96	33	5.32643	1.7313	2.29524	7.8332	668.329	58.6736	17.2606	0.896943	0.583817	0.0400081	2.98762	0.53496	4.21222	0.504884	31.2539	920.516	1.07682	1.56121	2.98762	0.626326	0.110915	0.409275	0.0340909	7.21212	0.121722	5.10583	0.344446	31.303	925.178	1.03809	1.57179	7.21212	0.77766	0.105928	0.401524	1.07e-06	9	140	s
414	69	24	4.30733	0.500764	3.38937	5.19498	658.426	77.7204	10.6953	0.641126	-0.666846	0.0963344	1.35065	0.461772	2.25472	0.646753	36.3983	1267.76	0.844251	1.16296	1.35065	0.493241	0.0906443	0.32333	0.0941043	2.35714	0.0141079	2.19544	0.507143	36.1667	1257.57	0.738679	1.13284	2.35714	0.559489	0.0737842	0.288319	1.18e-06	6	193	s
415	107	32	5.52513	1.10144	3.96986	7.30649	788.671	58.0834	15.6624	0.809494	-0.699391	0.0261697	4.75272	0.52036	5.95447	0.444553	29.8832	838.768	1.18293	1.75689	4.75272	0.713968	0.11135	0.432566	0.0272763	7.77465	0.154507	5.5977	0.298969	29.493	816.789	1.09978	1.66136	7.77465	0.751459	0.121297	0.439408	1.38e-06	14	244	s
416	91	28	4.98576	0.596001	3.91442	5.94329	788.336	75.8124	11.9237	0.526059	0.592367	0.0413509	2.49518	0.453103	3.28121	0.50732	33.9164	1089.24	1.01329	1.47321	2.49518	0.585452	0.0818109	0.343642	0.0363314	4.30769	0.137931	3.49846	0.410957	34.4	1123.76	0.962365	1.47573	4.30769	0.671554	0.0556472	0.284607	1.52e-06	13	131	s
417	134	40	6.25953	1.79919	2.96332	8.95161	805.355	71.9502	19.355	0.860306	-0.460685	0.0240652	3.61505	0.722831	7.52138	0.493905	30.8753	901.742	1.22276	1.74109	3.61505	0.666044	0.175186	0.533065	0.0217626	11.1782	0.214917	8.11913	0.359717	30.4653	874.492	1.18747	1.75313	11.1782	0.86589	0.104309	0.418879	1.49e-06	16	335	s
418	66	28	4.32976	1.53469	1.57143	6.52781	812.931	59.5694	14.6705	0.903117	-0.357895	0.0279266	9.34742	0.343499	8.11912	0.321245	27.8545	730.881	1.17578	1.76784	9.34742	0.831082	0.0918738	0.395647	0.049169	13.7368	-0.249905	6.49515	0.268613	27.4211	707.149	0.984241	1.40959	13.7368	0.877219	0.1384	0.434839	1.39e-06	17	335	s
419	86	27	4.87096	0.592073	3.87741	5.85607	848.835	57.5379	12.9231	0.681476	-0.654692	0.0318964	5.91497	0.605465	8.49612	0.421571	26.398	658.652	1.20704	1.7282	5.91497	0.755855	0.161063	0.511078	0.0310906	12.9286	0.0848269	8.06346	0.319009	25.1786	595.669	1.08824	1.63388	12.9286	0.879139	0.13989	0.46678	1.22e-06	15	142	s
420	139	42	6.52826	2.09194	3.53297	9.8564	864.891	45.0285	21.2873	0.909474	-0.334148	0.0330444	2.91079	0.640244	5.0455	0.508283	31.8859	957.738	1.15372	1.63137	2.91079	0.623603	0.153902	0.488004	0.02715	6.67	0.25624	5.48398	0.346052	31.71	947.721	1.10845	1.67724	6.67	0.756706	0.0768245	0.354134	1.01e-06	9	278	s
421	169	47	7.99598	3.11743	2.89628	12.7765	558.718	74.8262	27.8097	0.953277	-0.77913	0.0266594	3.59455	0.611818	5.62998	0.465935	30.6917	887.406	1.15387	1.69055	3.59455	0.654668	0.126516	0.451813	0.0277431	6.6	0.212984	5.19306	0.337404	30.1667	856.37	1.07718	1.66849	6.6	0.750817	0.0760315	0.351491	1.09e-06	10	228	s
422	286	60	9.52316	2.60683	5.78624	14.0243	585.258	91.3415	28.3822	0.877203	-0.418104	0.0464688	1.30703	0.743709	3.54989	0.627889	33.18	1039.45	1.07766	1.43766	1.30703	0.48262	0.230341	0.558748	0.0332351	3.03704	0.454836	3.78543	0.478338	33.2181	1042.84	1.05075	1.56187	3.03704	0.618923	0.0899232	0.369808	1.22e-06	11	429	s
423	54	22	3.73459	0.69619	2.5	4.71699	591.91	112.724	10.3079	0.718291	-0.504751	0.0224653	7.96571	0.552666	9.90354	0.351436	26.88	685.182	1.23759	1.8167	7.96571	0.803069	0.150412	0.505789	0.0292969	15.6875	-0.0308008	8.60938	0.238297	26.25	650.092	1.04401	1.59212	15.6875	0.823859	0.23135	0.583662	1.35e-06	9	122	s
424	403	83	11.1086	3.63664	1.87259	17.157	654.17	106.545	32.3792	0.743235	1.53508	0.0487371	1.71038	0.724668	4.10603	0.596513	31.6503	943.674	1.10588	1.49298	1.71038	0.527531	0.210799	0.54459	0.0370479	3.73089	0.415666	4.19243	0.456919	31.3639	927.174	1.06317	1.58248	3.73089	0.665545	0.0799491	0.351385	1.34e-06	9	529	s
425	131	41	6.21087	1.9844	3.00802	9.43395	698.807	91.8973	20.311	0.901041	-1.52965	0.0354946	3.20705	0.646335	5.53401	0.570121	30.6123	882.49	1.15795	1.61052	3.20705	0.624005	0.19371	0.540448	0.0250109	5.72917	0.518915	6.95443	0.428563	30.625	884.797	1.18509	1.68429	5.72917	0.733124	0.168761	0.516597	1.34e-06	10	185	s
426	101	31	5.28768	1.1527	3.33149	7.13253	716.689	95.522	15.1576	0.78725	-0.384735	0.0272156	6.41787	0.554263	8.19916	0.409689	26.7233	673.724	1.20188	1.75245	6.41787	0.763954	0.133904	0.471556	0.0237056	12.1831	0.0662511	7.52376	0.278054	26.493	659.258	1.0893	1.69415	12.1831	0.860633	0.151235	0.492013	1.41e-06	9	176	s
427	232	53	8.1956	1.84996	4.38418	11.0911	645.553	186.561	23.4475	0.807715	0.0631212	0.02538	3.189	0.70898	6.47899	0.520118	29.3947	812.883	1.21396	1.71466	3.189	0.639365	0.186005	0.544487	0.0219136	5.23333	0.461013	5.85478	0.402296	28.9444	786.74	1.14959	1.7334	5.23333	0.721917	0.108631	0.424906	1.65e-06	15	287	s
428	79	30	4.70143	1.28922	2.51683	6.67841	742.342	172.368	14.5405	0.863937	0.100165	0.0293689	3.58015	0.736814	7.80156	0.500151	32.2137	986.337	1.18616	1.65941	3.58015	0.658417	0.193037	0.54636	0.0424	5.62	0.531815	7.0019	0.420785	31.82	961.516	1.10961	1.49258	5.62	0.747156	0.17962	0.505108	1.76e-06	15	344	s
429	152	40	6.80943	1.52288	4.28515	9.6831	755.321	160.65	19.357	0.801169	-0.691078	0.0216934	4.55431	0.670265	7.90602	0.45657	27.1124	691.804	1.25247	1.80246	4.55431	0.699225	0.176894	0.543285	0.021538	10.5798	0.336607	8.97403	0.337756	27.1681	695.452	1.20394	1.78817	10.5798	0.827251	0.146259	0.495838	1.77e-06	14	344	s
430	134	37	6.08561	0.945387	4.49819	7.73488	781.286	154.615	15.7276	0.62953	0.427639	0.024693	4.56503	0.625423	7.09358	0.467087	27.3113	700.862	1.21431	1.7636	4.56503	0.699655	0.161565	0.516272	0.030421	8.9902	0.345502	7.86801	0.373619	27.4412	709.785	1.14852	1.71517	8.9902	0.82774	0.145561	0.485854	1.81e-06	13	178	s
431	86	27	4.79831	0.418516	3.96573	5.50969	803.079	141.324	11.9493	0.48434	-1.36139	0.0287265	7.79932	0.650038	12.1431	0.384826	25.5272	625.967	1.2539	1.82774	7.79932	0.810662	0.165618	0.530191	0.0380556	18.2167	0.14742	11.6833	0.288909	24.3167	560.867	1.15741	1.59255	18.2167	0.937557	0.111555	0.414138	1.79e-06	13	216	s
432	52	21	3.62197	0.296116	2.86744	4.06885	799.349	172.407	8.77476	0.387222	0.269455	0.0267848	6.00592	0.405318	6.04969	0.388534	28.858	782.285	1.14352	1.70283	6.00592	0.738389	0.112553	0.428712	0.0395508	10.5	-0.034045	6.07715	0.269244	28.4375	762.463	1.00296	1.47811	10.5	0.807711	0.19218	0.519299	1.83e-06	17	1056	s
433	363	69	10.2987	1.99962	5.47945	13.427	815.526	163.674	25.1229	0.509304	-1.1593	0.025963	3.52517	0.726281	7.4394	0.511161	27.704	721.318	1.26375	1.79269	3.52517	0.658174	0.199087	0.572042	0.0210577	8.37061	0.393145	7.89671	0.388618	27.8275	726.921	1.22475	1.84391	8.37061	0.819619	0.119822	0.457653	1.8e-06	16	1056	s
434	56	22	3.82724	0.581205	2.88663	4.85854	833.629	176.833	10.1314	0.688679	0.670084	0.0618412	4.6612	0.319535	4.42501	0.486001	29.8743	842.752	1.00022	1.4792	4.6612	0.706441	0.0789435	0.338338	0.0488281	4.96875	0.217652	4.17554	0.329878	29.2188	807.204	0.943847	1.40149	4.96875	0.648544	0.150207	0.451179	1.74e-06	16	77	s
435	211	51	7.78118	1.56569	4.42829	10.572	848.072	165.628	21.5134	0.73831	-0.722831	0.0204891	4.24701	0.738889	9.13259	0.47451	27.0465	692.158	1.28072	1.83505	4.24701	0.682445	0.197468	0.575377	0.0186382	9.7193	0.446212	9.77528	0.350323	27.0643	691.613	1.25287	1.86733	9.7193	0.841449	0.139654	0.494455	1.64e-06	16	344	s
436	42	20	3.22386	0.804196	1.6	4.30813	855.62	177.214	10.1158	0.820761	-1.3076	0.0268924	7.51145	0.455527	7.89791	0.356626	27.8931	732.593	1.2002	1.71161	7.51145	0.791304	0.117358	0.438362	0.0408163	13.0952	0.0417323	7.83277	0.332157	27.381	709.458	1.01388	1.42608	13.0952	0.82725	0.200612	0.521905	1.59e-06	14	344	s
437	136	40	6.35634	1.69468	3.96548	9.50921	870.326	183.963	19.1173	0.858896	1.07802	0.0294523	3.65254	0.740563	8.03937	0.497754	31.0593	914.239	1.23091	1.73614	3.65254	0.666612	0.201997	0.568336	0.0273503	6.11881	0.560263	7.95736	0.395195	31.1485	920.192	1.17383	1.6855	6.11881	0.752012	0.204018	0.564042	1.46e-06	16	532	s
438	104	33	5.33571	0.980238	3.18514	7.06847	893.1	173.069	14.9886	0.744294	-1.04717	0.040424	5.52661	0.573489	7.47886	0.450626	27.5826	717.55	1.17882	1.68084	5.52661	0.744721	0.133112	0.461661	0.0749851	9.08451	0.0306398	5.68583	0.457296	26.9437	684.532	0.965333	1.37567	9.08451	0.801939	0.0932943	0.354899	1.21e-06	12	149	s
439	190	46	7.39322	1.27301	4.88589	9.691	811.249	191.287	18.8977	0.632292	-0.925139	0.0190124	4.11046	0.680982	7.44235	0.46151	29.1414	799.497	1.25164	1.81984	4.11046	0.686294	0.162349	0.524382	0.026205	9.01987	0.346918	7.90562	0.368987	28.9934	790.701	1.20672	1.7203	9.01987	0.825749	0.104352	0.415384	1.81e-06	15	1056	s
440	78	29	4.60437	1.0754	2.75215	6.30997	825.181	187.291	13.2995	0.812525	0.0901925	0.0382249	2.59231	0.589523	4.15768	0.513794	34.6077	1135.57	1.05871	1.52972	2.59231	0.579425	0.154813	0.475807	0.0368656	5.16667	0.331633	4.86514	0.347285	34.7593	1145.88	1.06087	1.54913	5.16667	0.688545	0.141396	0.458243	1.77e-06	16	1056	s
441	42	20	3.22386	0.804196	1.6	4.30813	855.62	177.214	10.1158	0.820761	-1.3076	0.0268924	7.51145	0.455527	7.89791	0.356626	27.8931	732.593	1.2002	1.71161	7.51145	0.791304	0.117358	0.438362	0.0408163	13.0952	0.0417323	7.83277	0.332157	27.381	709.458	1.01388	1.42608	13.0952	0.82725	0.200612	0.521905	1.59e-06	14	344	s
442	136	40	6.35634	1.69468	3.96548	9.50921	870.326	183.963	19.1173	0.858896	1.07802	0.0294523	3.65254	0.740563	8.03937	0.497754	31.0593	914.239	1.23091	1.73614	3.65254	0.666612	0.201997	0.568336	0.0273503	6.11881	0.560263	7.95736	0.395195	31.1485	920.192	1.17383	1.6855	6.11881	0.752012	0.204018	0.564042	1.46e-06	16	532	s
443	151	44	6.96799	2.23892	2.82888	10.9359	867.708	196.456	21.5671	0.869623	0.755247	0.0315303	4.99617	0.506168	6.05857	0.46209	27.3602	702.735	1.13999	1.69998	4.99617	0.720771	0.105032	0.414435	0.026743	8.74775	0.0971036	5.84427	0.354918	27.036	683.519	1.09591	1.6761	8.74775	0.810942	0.0908839	0.384058	1.48e-06	16	532	s
444	128	42	6.00359	1.34646	3.62546	8.46287	853.236	198.82	15.5026	0.548594	0.28215	0.0258804	6.34247	0.460251	6.87538	0.414324	25.0274	585.688	1.18356	1.76724	6.34247	0.762726	0.0916677	0.395158	0.0229917	11.8316	0.0695202	7.35778	0.385647	25.1789	592.665	1.11517	1.72717	11.8316	0.852115	0.157784	0.506072	1.6e-06	18	532	s
445	43	18	3.30046	0.36706	2.71314	3.87657	889.272	199.641	8.50476	0.576287	-1.08146	0.028904	6.67883	0.41233	6.68247	0.374947	28.0073	737.897	1.14011	1.66753	6.67883	0.757756	0.128259	0.451995	0.08375	6.15	-0.0533076	3.91938	0.426216	26.15	646.794	0.826761	1.19567	6.15	0.742327	0.129999	0.391354	1.26e-06	13	105	s
446	42	19	3.20052	0.453218	2.38938	3.93014	879.66	216.425	8.68218	0.665843	0.143482	0.0312058	3.15038	0.471995	3.98328	0.449138	31.2105	918.628	1.04689	1.56556	3.15038	0.613054	0.1244	0.433044	0.0453686	6.86957	0.0304162	4.54253	0.285815	31.2174	923.457	0.94932	1.36814	6.86957	0.686247	0.149784	0.445754	1.35e-06	13	187	s
447	79	28	4.58554	0.825049	2.77217	5.86509	876.505	224.797	12.4939	0.64048	0.34632	0.0264009	8.13962	0.540279	9.85278	0.385564	24.3585	561.984	1.23465	1.80874	8.13962	0.816524	0.149024	0.502662	0.0425532	10.5319	0.248656	8.00871	0.343006	23.1702	505.757	1.07373	1.5303	10.5319	0.814543	0.206757	0.545287	1.37e-06	13	187	s
448	58	24	3.9389	1.14745	1.13728	5.60893	850.336	229.041	12.1087	0.827766	1.23007	0.0371864	4.08065	0.389411	4.34156	0.46497	31.2527	920.698	1.06308	1.55499	4.08065	0.67252	0.085136	0.359358	0.0452653	5.35484	-0.124072	3.38189	0.345643	30.3871	874.245	0.890116	1.3931	5.35484	0.69913	0.128312	0.416979	1.59e-06	16	153	s
449	105	35	5.41231	1.43311	2.6069	7.3947	828.374	222.17	17.0174	0.85307	-1.43433	0.0149983	4.82173	0.690256	8.78341	0.388304	29.1671	803.867	1.28245	1.87072	4.82173	0.698913	0.168716	0.539968	0.0160204	9.05714	0.339701	7.85837	0.273762	28.6286	770.738	1.19937	1.84994	9.05714	0.784257	0.130317	0.476775	1.73e-06	15	185	s
450	93	29	4.9917	0.409057	4.07918	5.63717	815.245	219.354	12.1484	0.435924	0.684116	0.0154087	6.26646	0.683655	10.9045	0.397014	26.6991	677.782	1.31342	1.91666	6.26646	0.74968	0.176144	0.55625	0.0393046	11.9841	0.302612	9.59215	0.29768	25.8889	633.814	1.1618	1.5579	11.9841	0.879397	0.132004	0.444552	1.78e-06	16	374	s
451	186	44	7.33408	1.09869	5.59257	9.54437	803.967	210.011	18.6593	0.645343	1.41737	0.0230871	3.5753	0.722011	7.43065	0.481543	28.1355	745.638	1.23776	1.75879	3.5753	0.659588	0.175139	0.535272	0.0262346	8.26389	0.367017	7.52773	0.391135	28.0139	737.396	1.18949	1.75743	8.26389	0.810491	0.132948	0.470554	1.82e-06	15	374	s
452	190	46	7.39322	1.27301	4.88589	9.691	811.249	191.287	18.8977	0.632292	-0.925139	0.0190124	4.11046	0.680982	7.44235	0.46151	29.1414	799.497	1.25164	1.81984	4.11046	0.686294	0.162349	0.524382	0.026205	9.01987	0.346918	7.90562	0.368987	28.9934	790.701	1.20672	1.7203	9.01987	0.825749	0.104352	0.415384	1.81e-06	15	1056	s
453	78	29	4.60437	1.0754	2.75215	6.30997	825.181	187.291	13.2995	0.812525	0.0901925	0.0382249	2.59231	0.589523	4.15768	0.513794	34.6077	1135.57	1.05871	1.52972	2.59231	0.579425	0.154813	0.475807	0.0368656	5.16667	0.331633	4.86514	0.347285	34.7593	1145.88	1.06087	1.54913	5.16667	0.688545	0.141396	0.458243	1.77e-06	16	1056	s
454	93	32	5.15719	1.48827	2.55582	7.40994	475.52	200.481	16.5052	0.87326	-1.13199	0.0332519	7.5828	0.447027	7.85639	0.41134	25.7102	622.129	1.16866	1.74122	7.5828	0.796486	0.105901	0.420623	0.0445274	12.8305	-0.0580515	7.06327	0.336155	25.0339	587.541	1.03143	1.55534	12.8305	0.875797	0.118483	0.421775	1.4e-06	12	197	s
455	158	55	7.35323	3.13089	1.92599	12.8261	449.689	195.884	27.3082	0.947158	-1.00532	0.0235923	4.63296	0.646207	7.54756	0.436775	31.3783	931.345	1.21559	1.78278	4.63296	0.705703	0.133636	0.474677	0.0218914	11.6667	0.229871	8.57448	0.308143	30.9825	906.722	1.18161	1.73189	11.6667	0.874094	0.0744915	0.354135	1.28e-06	4	441	s
456	119	40	5.75874	0.879667	4.24124	7.31014	454.622	203.191	14.3367	0.554033	-1.56263	0.0197257	5.61084	0.761681	12.7717	0.441252	31.266	938.18	1.32099	1.86802	5.61084	0.736062	0.207759	0.59287	0.0278159	12.0864	0.460208	12.1954	0.306568	30.6543	899.422	1.21409	1.65459	12.0864	0.874575	0.211326	0.568858	1.32e-06	4	441	s
457	141	39	6.51555	1.62895	3.48577	9.35054	421.673	195.286	19.0433	0.842165	-0.678382	0.0270755	3.04472	0.587699	4.69235	0.49276	33.6829	1071.16	1.13399	1.6611	3.04472	0.624018	0.118779	0.434996	0.0307813	5.9802	0.163939	4.57641	0.404978	33.3465	1051.6	1.0467	1.58922	5.9802	0.749372	0.0970171	0.386775	1.15e-06	7	193	s
458	144	47	7.60782	3.51621	1.11657	13.0438	394.516	200.13	28.4252	0.967167	-0.77616	0.0181158	6.34497	0.531636	7.77355	0.383367	31.2033	919.043	1.23174	1.84982	6.34497	0.755567	0.0965366	0.413618	0.0355759	9.40909	0.113663	6.30785	0.320677	30.6364	886.359	1.0638	1.63342	9.40909	0.808585	0.139433	0.466	1.05e-06	6	319	s
459	101	29	5.31413	0.77277	4.00312	6.54355	465.778	219.012	14.4994	0.723426	-0.571833	0.0190228	6.46991	0.679465	11.0924	0.378256	27.0143	695.455	1.2936	1.87924	6.46991	0.765246	0.170402	0.543458	0.0304178	11.5303	0.202528	8.22928	0.322025	25.7121	623.025	1.1024	1.61246	11.5303	0.867107	0.151459	0.481875	1.4e-06	9	128	s
460	118	37	6.44783	2.47418	2.46183	10.1984	447.398	230.269	22.6461	0.945421	-0.722895	0.0283425	7.03491	0.693161	12.4635	0.460653	30.1621	874.66	1.25119	1.77014	7.03491	0.777314	0.190863	0.558281	0.0286719	13.6	0.422314	12.7711	0.387961	30.125	868.315	1.23157	1.69608	13.6	0.882056	0.173568	0.524941	1.35e-06	7	134	s
461	101	29	5.31413	0.77277	4.00312	6.54355	465.778	219.012	14.4994	0.723426	-0.571833	0.0190228	6.46991	0.679465	11.0924	0.378256	27.0143	695.455	1.2936	1.87924	6.46991	0.765246	0.170402	0.543458	0.0304178	11.5303	0.202528	8.22928	0.322025	25.7121	623.025	1.1024	1.61246	11.5303	0.867107	0.151459	0.481875	1.4e-06	9	128	s
462	71	25	4.31992	0.519103	3.29679	5.12141	491.117	212.448	10.5184	0.381122	-0.833451	0.0295893	7.24895	0.522492	8.5904	0.429104	28.2278	753.362	1.20471	1.74216	7.24895	0.778413	0.135824	0.473503	0.0298765	11.8444	0.131435	7.8184	0.278746	27.7556	726.228	1.09474	1.60218	11.8444	0.846458	0.190906	0.535636	1.47e-06	13	917	s
463	43	19	3.29465	0.540439	2.10526	4.07309	501.705	209.311	8.73827	0.647052	-0.537802	0.0261949	10.1176	0.282388	8.04952	0.33977	28.0882	744.256	1.14059	1.69465	10.1176	0.844608	0.0914733	0.387217	0.0378072	8.04348	-0.132703	4.55057	0.327026	27.4348	708.162	0.93944	1.47285	8.04348	0.78749	0.147321	0.456974	1.5e-06	14	917	s
464	67	25	4.31563	1.03967	2.60277	5.94427	471.016	232.141	12.9169	0.834047	-0.56455	0.0232387	5.95928	0.465808	6.57784	0.432172	28.7466	776.692	1.17234	1.76253	5.95928	0.750858	0.120095	0.449041	0.058518	7.10526	0.0477074	4.73061	0.420165	28.1579	747.718	0.956769	1.35414	7.10526	0.780723	0.177935	0.482072	1.45e-06	9	100	s
465	63	27	4.24396	1.3877	1.70732	6.50841	518.965	197.458	13.5456	0.883108	-0.778781	0.0460261	4.21393	0.253926	3.82407	0.478254	30.8209	896.255	1.00189	1.51246	4.21393	0.673622	0.0757462	0.335048	0.0987144	2.84848	-0.112626	2.28007	0.476292	30.303	877.619	0.716768	1.12832	2.84848	0.577464	0.0995595	0.333915	1.51e-06	13	917	s
466	55	23	3.78339	1.03608	1.62971	5.29597	525.818	187.793	11.4466	0.812141	-1.21956	0.0291516	4.01136	0.510953	5.10121	0.453237	30.625	884.19	1.0988	1.6173	4.01136	0.676094	0.126642	0.443179	0.0416362	9.51351	0.0260245	5.88386	0.318906	31.2432	925.768	0.981943	1.446	9.51351	0.797986	0.130931	0.428236	1.51e-06	12	917	s
467	116	35	5.91913	1.52659	3.43583	8.34467	517.039	216.301	18.5191	0.876375	-0.583345	0.0213438	6.5125	0.680005	11.1759	0.4293	27.7525	735.818	1.26426	1.89006	6.5125	0.770409	0.169789	0.543868	0.0272062	10.6049	0.369941	9.41583	0.358876	27.4198	711.934	1.1733	1.64762	10.6049	0.825611	0.11787	0.431816	1.54e-06	13	222	s
468	62	26	4.27079	1.44473	1.80278	6.26498	497.484	237.98	14.4875	0.907986	-0.516121	0.0234338	9.40201	0.351332	8.24717	0.345329	26.4975	660.093	1.18926	1.79492	9.40201	0.835975	0.0946708	0.404187	0.054784	16.0833	-0.0606824	8.5816	0.349353	26.25	652.539	0.985477	1.39948	16.0833	0.894926	0.117399	0.400198	1.53e-06	13	121	s
469	122	41	5.89367	2.19809	1.4878	9.09269	475.784	252.518	20.2525	0.897274	-0.785096	0.0160943	5.90097	0.724616	11.7141	0.408697	28.8333	794.264	1.31409	1.90633	5.90097	0.744191	0.187905	0.571453	0.0177038	17.3793	0.387233	15.181	0.285601	28.3218	770.44	1.28306	1.84302	17.3793	0.932406	0.25149	0.641477	1.5e-06	7	178	s
470	110	44	6.42414	2.84091	1.97727	10.7788	541.042	236.083	24.5309	0.965538	-0.390191	0.014125	9.31768	0.425935	9.11552	0.304136	28.2017	749.018	1.25962	1.9421	9.31768	0.826198	0.0887485	0.406242	0.0195337	16.3188	-0.0936963	8.46041	0.186308	28.5507	764.776	1.14173	1.77344	16.3188	0.887093	0.144085	0.490616	1.58e-06	9	223	s
471	129	42	6.51659	2.40888	2.97095	10.3357	562.713	221.96	22.8535	0.937921	-0.407635	0.0236398	6.55782	0.514604	7.75513	0.443189	29.4785	819.234	1.21592	1.79581	6.55782	0.776555	0.114941	0.443484	0.0281802	13.1064	0.19785	9.16953	0.357843	29.7872	838.473	1.17078	1.6984	13.1064	0.864603	0.18638	0.542827	1.59e-06	10	183	s
472	99	31	5.18046	0.76846	3.32509	6.44266	587.632	227.589	13.6714	0.664076	-1.29554	0.0227638	7.32059	0.696994	13.0799	0.41534	27.9382	751.454	1.28388	1.87764	7.32059	0.782177	0.184269	0.562933	0.0174576	16.2222	0.264471	12.0276	0.285025	27.9722	742.278	1.24415	1.83064	16.2222	0.913891	0.175588	0.544963	1.61e-06	8	130	s
473	119	38	5.76185	1.68026	1.98121	8.15501	611.616	220.621	17.749	0.847646	0.65918	0.022227	6.02941	0.617698	8.88567	0.406621	30.7647	897.624	1.23318	1.77347	6.02941	0.757457	0.145175	0.492354	0.0241115	13.046	0.264417	9.86778	0.352892	30.6782	892.159	1.1869	1.71718	13.046	0.877905	0.179314	0.535701	1.64e-06	12	318	s
474	100	30	5.2313	0.621051	4.01013	6.23012	626.882	202.185	12.4324	0.311508	-1.26389	0.0190475	6.0436	0.71957	11.7756	0.409884	26.8401	688.131	1.32399	1.88354	6.0436	0.759037	0.189887	0.57135	0.020544	13	0.431541	12.4344	0.24557	26.6111	674.47	1.27867	1.79199	13	0.874956	0.191297	0.561689	1.65e-06	14	127	s
475	232	53	8.1956	1.84996	4.38418	11.0911	645.553	186.561	23.4475	0.807715	0.0631212	0.02538	3.189	0.70898	6.47899	0.520118	29.3947	812.883	1.21396	1.71466	3.189	0.639365	0.186005	0.544487	0.0219136	5.23333	0.461013	5.85478	0.402296	28.9444	786.74	1.14959	1.7334	5.23333	0.721917	0.108631	0.424906	1.65e-06	15	287	s
476	59	22	3.9674	0.605931	2.64263	4.84128	652.086	205.778	10.658	0.711283	0.751611	0.026929	3.91237	0.554488	5.39087	0.43377	32.4691	995.343	1.13711	1.63965	3.91237	0.666136	0.123225	0.440126	0.033179	10.9444	-0.0791236	6.07099	0.270829	31.7778	957.577	0.984315	1.54694	10.9444	0.80381	0.186752	0.522369	1.68e-06	14	86	s
477	107	35	5.70535	1.66083	3.01032	8.5943	637.864	212.612	17.8141	0.876068	0.542491	0.0356237	6.57967	0.471245	7.22185	0.451418	26.9478	683.566	1.1552	1.68918	6.57967	0.773932	0.110037	0.42256	0.0402528	13.25	0.0228232	7.77974	0.392086	26.6974	670.728	1.06811	1.56729	13.25	0.885608	0.142979	0.463063	1.67e-06	13	262	s
478	107	36	5.55383	1.46562	2.18104	8.20103	651.659	218.689	17.1923	0.850852	-0.370575	0.0179936	6.07438	0.679305	10.4707	0.418965	27.865	737.047	1.30868	1.89695	6.07438	0.75075	0.174928	0.552138	0.0225575	11.1358	0.384347	10.0439	0.299271	27.8519	733.471	1.23548	1.84033	11.1358	0.868686	0.153463	0.513357	1.69e-06	13	262	s
479	52	21	3.67215	0.585639	2.43603	4.51779	681.199	202.524	9.75377	0.693026	0.545863	0.0583546	3.48214	0.24724	3.31292	0.487552	32.8988	1024.97	0.973945	1.44447	3.48214	0.64867	0.0744945	0.32519	0.125911	2.29032	-0.263128	1.90661	0.551613	32.2258	998.608	0.64619	1.06114	2.29032	0.565569	0.106743	0.335819	1.71e-06	13	176	s
480	108	33	5.45603	0.995099	3.43762	7.12224	729.508	199.451	15.3759	0.766299	1.41305	0.028894	4.54692	0.663493	7.75606	0.431418	29.1153	801.065	1.2121	1.73031	4.54692	0.701606	0.166328	0.519048	0.050378	9.62821	0.272228	7.61485	0.379912	28.8333	787.66	1.06952	1.51053	9.62821	0.843059	0.169948	0.494604	1.78e-06	15	280	s
481	67	26	4.16089	0.87234	2.03882	5.40682	744.269	189.015	11.8156	0.753419	0.171415	0.019543	6.05882	0.624764	9.07335	0.392836	29.0271	796.829	1.26757	1.81073	6.05882	0.750441	0.168421	0.532198	0.0303391	8.78049	0.346787	7.721	0.327309	28.4878	764.758	1.16282	1.60816	8.78049	0.790956	0.215994	0.567929	1.79e-06	14	233	s
482	84	29	4.71074	0.631439	3.30045	5.84541	754.022	198.596	12.1612	0.595954	1.51682	0.0238412	4.17193	0.595264	6.1539	0.430256	28.3053	752.398	1.17678	1.72474	4.17193	0.677853	0.135302	0.470561	0.0260725	8.36538	0.0807681	5.5502	0.296494	27.3269	699.731	1.06106	1.65021	8.36538	0.782771	0.104365	0.40762	1.81e-06	12	233	s
483	118	37	6.44783	2.47418	2.46183	10.1984	447.398	230.269	22.6461	0.945421	-0.722895	0.0283425	7.03491	0.693161	12.4635	0.460653	30.1621	874.66	1.25119	1.77014	7.03491	0.777314	0.190863	0.558281	0.0286719	13.6	0.422314	12.7711	0.387961	30.125	868.315	1.23157	1.69608	13.6	0.882056	0.173568	0.524941	1.35e-06	7	134	s
484	122	41	5.89367	2.19809	1.4878	9.09269	475.784	252.518	20.2525	0.897274	-0.785096	0.0160943	5.90097	0.724616	11.7141	0.408697	28.8333	794.264	1.31409	1.90633	5.90097	0.744191	0.187905	0.571453	0.0177038	17.3793	0.387233	15.181	0.285601	28.3218	770.44	1.28306	1.84302	17.3793	0.932406	0.25149	0.641477	1.5e-06	7	178	s
485	62	26	4.27079	1.44473	1.80278	6.26498	497.484	237.98	14.4875	0.907986	-0.516121	0.0234338	9.40201	0.351332	8.24717	0.345329	26.4975	660.093	1.18926	1.79492	9.40201	0.835975	0.0946708	0.404187	0.054784	16.0833	-0.0606824	8.5816	0.349353	26.25	652.539	0.985477	1.39948	16.0833	0.894926	0.117399	0.400198	1.53e-06	13	121	s
486	99	30	5.21652	0.72201	3.60555	6.32456	507.958	273.779	13.487	0.637902	-1.47743	0.0165441	7.57059	0.554533	9.49737	0.369635	26.5412	664.769	1.27558	1.89184	7.57059	0.788063	0.124243	0.470828	0.0295139	17.0972	0.128286	10.8067	0.312073	26.5972	667.893	1.18534	1.60155	17.0972	0.878873	0.136254	0.456917	1.59e-06	11	139	s
487	77	27	4.50606	0.531495	3.48089	5.3719	522.723	278.25	10.6445	0.44425	1.42379	0.200807	0.682171	0.146979	1.39986	0.737984	37.6744	1376.45	0.5863	0.812145	0.682171	0.384489	0.0230276	0.1369	0.147443	1.13725	-0.129008	1.50365	0.643137	37.4902	1363.46	0.577025	0.877202	1.13725	0.449882	0.0170913	0.122507	1.61e-06	12	135	s
488	100	31	5.23211	0.859909	3.31882	6.58065	536.784	262.564	14.2621	0.712425	-1.30798	0.0251318	6.6686	0.575536	8.85533	0.425266	26.7907	677.798	1.23596	1.7956	6.6686	0.771369	0.141569	0.489222	0.0215547	14.1842	0.209677	9.97368	0.275914	27	687.3	1.20098	1.78722	14.1842	0.903045	0.118799	0.449516	1.6e-06	12	117	s
489	137	43	7.14165	2.95771	2.7352	11.8181	369.825	233.148	25.8508	0.959822	-0.627383	0.0310447	3.66595	0.51843	4.80625	0.499569	32.0642	968.861	1.12394	1.65966	3.66595	0.664063	0.112012	0.422792	0.0283645	7.13131	0.119501	5.04959	0.414935	32.0606	970.793	1.04891	1.65274	7.13131	0.771908	0.10469	0.408514	1.01e-06	7	277	s
490	87	36	5.34616	2.31766	1.36111	8.78872	367.188	253.603	19.9356	0.95345	-0.398718	0.0538339	4.33922	0.321319	4.19681	0.456002	32.3816	992.705	1.00875	1.5022	4.33922	0.698473	0.0571571	0.29085	0.0550129	9.54237	-0.134441	5.20576	0.324442	32.7966	1021.05	0.956934	1.43724	9.54237	0.785781	0.123351	0.414924	1.05e-06	7	124	s
491	113	41	5.83628	2.35305	1.8639	9.2663	426.578	259.253	21.6202	0.932524	0.0462284	0.0158824	6.82677	0.573614	9.00538	0.382141	29.21	805.954	1.26791	1.89865	6.82677	0.77707	0.137271	0.494056	0.0191282	15.1975	-0.0375916	8.32346	0.287865	29.0494	792.753	1.14497	1.76303	15.1975	0.922365	0.183026	0.546769	1.33e-06	8	149	s
492	77	28	4.53015	1.08947	2.92857	6.09491	430.058	273.318	13.4905	0.828925	1.56017	0.0322772	4.15116	0.709516	8.14525	0.476922	34.0194	1102.98	1.17807	1.6608	4.15116	0.686008	0.18774	0.539575	0.0315775	10.3607	0.259384	7.99463	0.367356	34.2951	1118.19	1.12026	1.57547	10.3607	0.844936	0.120249	0.427261	1.38e-06	8	96	s
493	40	18	3.14101	0.366102	2.68742	3.72678	454.643	279.8	8.09531	0.583891	-0.853269	0.0345175	3.53968	0.57845	5.19841	0.458989	34.6667	1140.35	1.09443	1.58496	3.53968	0.653961	0.172132	0.508015	0.0303254	9.07692	-0.057931	5.28994	0.236925	34.6154	1137.52	1.00836	1.54233	9.07692	0.750092	0.147313	0.466377	1.48e-06	5	62	s
494	99	30	5.21652	0.72201	3.60555	6.32456	507.958	273.779	13.487	0.637902	-1.47743	0.0165441	7.57059	0.554533	9.49737	0.369635	26.5412	664.769	1.27558	1.89184	7.57059	0.788063	0.124243	0.470828	0.0295139	17.0972	0.128286	10.8067	0.312073	26.5972	667.893	1.18534	1.60155	17.0972	0.878873	0.136254	0.456917	1.59e-06	11	139	s
495	134	39	6.56691	1.94467	3.23707	9.70153	577.226	277.288	21.1349	0.903163	-0.533908	0.0293074	6.89677	0.527133	8.29251	0.45522	26.7505	674.4	1.21376	1.77479	6.89677	0.781228	0.119989	0.450243	0.023807	14.3299	0.136712	9.29961	0.340259	26.4948	659.787	1.17848	1.73795	14.3299	0.896681	0.123721	0.452581	1.64e-06	8	257	s
496	236	66	8.42004	3.47411	0.83677	14.7146	551.011	294.719	29.0341	0.880138	-0.924288	0.018299	5.70944	0.667446	9.58424	0.420244	29.2688	811.493	1.28904	1.86269	5.70944	0.749206	0.154011	0.516862	0.0163989	13.0684	0.270539	9.95758	0.292055	29.3421	811.363	1.26007	1.89427	13.0684	0.89809	0.0917753	0.408133	1.66e-06	12	1000	s
497	122	37	5.85247	1.3583	3.22755	8.04117	569.288	299.372	17.7113	0.822177	0.0247076	0.0194379	6.04255	0.681585	10.4885	0.390821	28.2033	756.414	1.28672	1.87586	6.04255	0.757599	0.151624	0.514691	0.0184949	12.8929	0.295618	10.1519	0.261089	27.3929	709.746	1.20065	1.82396	12.8929	0.833063	0.162484	0.525086	1.68e-06	12	149	s
498	115	33	5.60776	0.867893	4.06162	7.38425	533.022	316.74	15.1997	0.70421	0.608474	0.0212122	4.70677	0.732254	9.78961	0.432297	27.6842	727.499	1.28255	1.81771	4.70677	0.704233	0.196163	0.571447	0.0242023	11.1628	0.381388	10.0224	0.290499	27.1628	696.361	1.25074	1.73007	11.1628	0.852759	0.125667	0.455022	1.7e-06	14	1000	s
499	206	56	7.2797	2.26334	0.817927	10.0352	516.518	321.652	19.9803	0.585005	0.393881	0.016232	4.86226	0.72174	9.73691	0.451761	29.3278	814.92	1.31292	1.90528	4.86226	0.715615	0.170043	0.546062	0.0147379	10.5686	0.402053	9.83742	0.288566	28.634	773.818	1.26544	1.9156	10.5686	0.856889	0.115412	0.457308	1.7e-06	16	1000	s
500	118	35	5.70181	1.28554	3.13636	7.36068	524.09	338.834	16.6423	0.794752	-1.30344	0.0157101	6.37164	0.65965	10.3604	0.387734	27.2176	703.765	1.28124	1.93604	6.37164	0.762022	0.136312	0.496626	0.0193157	13.7303	0.33426	11.3121	0.294938	27.1461	699.62	1.22115	1.80639	13.7303	0.905345	0.157115	0.51487	1.75e-06	14	1000	s
501	96	33	5.02118	0.760514	3.00963	6.16173	516.274	355.777	12.7457	0.486202	-0.199951	0.0259678	8.17593	0.598726	11.1875	0.389529	26.7994	685.034	1.25609	1.8464	8.17593	0.811877	0.13702	0.48769	0.02657	15.4493	0.259946	11.4379	0.31998	26.9565	689.084	1.21197	1.68939	15.4493	0.913854	0.127524	0.453381	1.78e-06	11	246	s
502	113	34	5.65318	1.02986	3.83234	7.34717	513.539	367.164	15.5698	0.715246	-0.872146	0.0295529	6.61282	0.614351	9.57363	0.422736	26.9103	687.465	1.224	1.77428	6.61282	0.779423	0.143849	0.490341	0.0266436	13.9412	0.172421	9.42287	0.311762	26.6706	670.617	1.15851	1.69856	13.9412	0.908733	0.108073	0.419985	1.8e-06	9	246	s
503	83	30	4.7923	1.37212	2.13333	6.76888	499.09	371.154	15.2955	0.862175	-1.19273	0.0262085	7.79496	0.503592	8.85136	0.417711	27.1619	695.488	1.24127	1.83172	7.79496	0.805704	0.120997	0.458415	0.0258789	17.25	0.111737	10.71	0.281383	28.3125	758.211	1.17173	1.66934	17.25	0.940071	0.146832	0.482116	1.8e-06	8	114	s
504	136	61	6.39277	2.14472	2.28857	10.6159	538.442	352.62	18.0591	0.713363	-1.05628	0.0189138	6.93151	0.71672	13.2344	0.422998	27.7078	738.061	1.32491	1.88781	6.93151	0.781028	0.184666	0.564731	0.0143244	17.5888	0.384471	15.2875	0.271531	28.0935	756.781	1.31249	1.89937	17.5888	0.946889	0.125022	0.473036	1.78e-06	12	594	s
505	389	81	10.1991	2.64482	2.68875	14.4929	543.745	366.045	25.64	0.501961	-1.50018	0.016303	4.66218	0.7276	9.55761	0.4403	27.8222	733.034	1.2993	1.89821	4.66218	0.709211	0.16582	0.538995	0.0136046	10.1171	0.372066	9.05586	0.31665	27.5665	714.477	1.25352	1.93663	10.1171	0.850843	0.0822733	0.391275	1.81e-06	9	594	s
506	164	53	6.97959	2.82028	0.622927	11.4559	629.375	263.049	23.9328	0.892622	0.885589	0.0567932	1.86988	0.498664	2.86489	0.589512	36.4724	1266.79	0.958946	1.3597	1.86988	0.541316	0.099847	0.364905	0.0539239	4.26446	0.129496	3.44942	0.487189	36.2314	1250.11	0.952782	1.40586	4.26446	0.672779	0.068095	0.30717	1.69e-06	11	1476	s
507	81	30	4.71495	1.24022	2.34473	6.78953	656.381	268.418	14.466	0.845817	1.29806	0.0198186	4.96679	0.490592	5.87506	0.388742	31.6384	942.814	1.17067	1.75397	4.96679	0.707454	0.0948492	0.400306	0.032	12.64	-0.173936	6.3836	0.283318	30.84	898.241	1.01808	1.598	12.64	0.842048	0.179143	0.519422	1.75e-06	14	412	s
508	139	42	6.08516	1.50762	2.10617	7.99748	666.692	296.738	15.2342	0.28608	0.632923	0.0218229	7.57708	0.699992	13.6281	0.432474	28.7188	794.585	1.30252	1.89032	7.57708	0.794148	0.170288	0.544627	0.0264757	14.9167	0.390617	13.2391	0.354818	27.7083	734.241	1.24702	1.74193	14.9167	0.892709	0.178536	0.53785	1.8e-06	14	484	s
509	70	28	4.59462	1.65575	1.56002	7.06132	683.613	307.629	15.2955	0.90899	0.757626	0.021124	6.10132	0.525707	7.43201	0.402664	30.207	860.754	1.20486	1.7957	6.10132	0.747142	0.133497	0.475949	0.04259	4.63158	0.490632	5.5464	0.365182	29.8421	842.949	1.04289	1.41133	4.63158	0.633753	0.215827	0.53783	1.85e-06	14	484	s
510	144	41	6.8822	2.36244	2.74181	10.4113	656.873	248.671	22.6159	0.919242	0.814668	0.021776	4.422	0.632587	7.01776	0.472484	29.158	800.335	1.21724	1.78954	4.422	0.698358	0.164973	0.524531	0.0191927	11.5702	0.284888	9.08982	0.342243	29.9339	846.659	1.19594	1.81362	11.5702	0.865334	0.192675	0.566304	1.73e-06	12	412	s
511	68	25	4.27373	0.880469	2.60768	5.45894	669.276	232.061	12.3632	0.767715	1.13073	0.0252346	6.44889	0.541232	8.02849	0.406889	29.2933	811.85	1.18311	1.76036	6.44889	0.759471	0.128995	0.46424	0.0392562	12.8636	0.107192	8.20403	0.255258	29.0455	795.978	1.11652	1.55102	12.8636	0.857514	0.169949	0.500294	1.73e-06	12	381	s
512	188	52	7.44693	2.18055	3.46688	10.6238	683.892	230.771	23.0001	0.841976	-0.0232907	0.0195021	5.17647	0.696479	9.52736	0.424248	28.0905	747.577	1.28297	1.87028	5.17647	0.728452	0.160198	0.527238	0.018661	12.4113	0.280172	9.62105	0.278093	27.6879	722.216	1.22773	1.84728	12.4113	0.882462	0.127644	0.471861	1.75e-06	13	381	s
513	85	34	4.93743	1.73774	2.11765	7.3133	691.807	252.188	16.9541	0.910783	-0.103069	0.0378251	5.87589	0.383571	5.76607	0.463252	27.2518	696.7	1.10771	1.61172	5.87589	0.740968	0.082659	0.360198	0.0497919	13.5517	-0.072003	7.32075	0.387919	27.6897	722.375	1.03174	1.48858	13.5517	0.869335	0.135128	0.440503	1.79e-06	12	121	s
514	87	30	4.78989	0.814631	3.50143	6.08769	710.457	253.404	13.3633	0.71556	-1.56643	0.018895	7.21622	0.633662	10.8491	0.404625	26.0946	647.239	1.29422	1.86661	7.21622	0.787252	0.161582	0.52889	0.0260107	14.4828	0.273443	10.9667	0.294908	25.1724	598.596	1.23056	1.69321	14.4828	0.894788	0.184575	0.539706	1.82e-06	13	149	s
515	77	28	4.51929	0.774783	3.00191	5.91705	693.496	267.552	12.2555	0.666673	-0.311469	0.0242999	7.26744	0.557441	9.2107	0.408839	27.5155	717.048	1.21964	1.80663	7.26744	0.775108	0.151582	0.506402	0.0242975	20.6182	0.116697	12.6711	0.295503	28.5455	775.356	1.17229	1.68552	20.6182	0.932787	0.213047	0.575289	1.82e-06	15	187	s
516	125	43	5.77564	1.85392	0.832675	8.64791	737.206	258.23	17.0523	0.708105	-0.705175	0.0259571	6.25882	0.476924	6.9827	0.422363	26.4376	655.223	1.18787	1.7707	6.25882	0.768505	0.0942607	0.400848	0.0238062	12.0824	-0.126089	6.36474	0.276936	26.1529	638.955	1.06154	1.71529	12.0824	0.856358	0.10149	0.409338	1.85e-06	14	281	s
517	92	33	5.04985	1.59414	2.40332	7.38878	756.806	219.55	16.6795	0.88284	-0.15471	0.0466025	6.46452	0.434867	6.71947	0.455597	25.0774	590.249	1.12254	1.57282	6.46452	0.75832	0.115948	0.419527	0.042454	11	-0.0859772	6.06456	0.354526	24.5873	565.506	1.00239	1.51442	11	0.867873	0.12264	0.423693	1.83e-06	16	128	s
518	99	33	5.51113	1.72814	2.69203	8.00975	752.695	240.635	18.1938	0.902162	-0.606336	0.0257296	8.05075	0.455494	8.3927	0.398728	25.1194	593.373	1.20597	1.78917	8.05075	0.809803	0.109105	0.431916	0.0381084	12.0303	0.0490673	7.32553	0.318263	24.303	554.087	1.0476	1.56043	12.0303	0.877893	0.135264	0.450094	1.84e-06	11	143	s
519	71	25	4.33067	0.545957	3.32674	5.36537	771.205	208.892	11.394	0.645654	-0.941083	0.0343902	5.42017	0.549069	7.00997	0.431122	27.7899	727.313	1.16861	1.6931	5.42017	0.740191	0.1662	0.514074	0.0453978	12.3265	0.0679012	7.61224	0.355721	27.7143	723.046	1.08867	1.46415	12.3265	0.873338	0.151866	0.462455	1.84e-06	15	342	s
520	112	33	5.49977	0.91939	2.94875	6.82007	788.287	242.502	13.8735	0.506918	1.10408	0.0295255	6.37726	0.691209	11.3262	0.418478	27.6227	729.595	1.2662	1.77489	6.37726	0.766922	0.171684	0.532418	0.0376471	17.0941	0.194959	11.6169	0.329587	27.4235	715.069	1.16147	1.61276	17.0941	0.929767	0.144833	0.471819	1.82e-06	14	165	s
521	112	32	5.57376	0.608842	4.45112	6.91466	822.583	266.44	13.8479	0.528127	1.12489	0.0231329	5.11568	0.645345	8.21218	0.429245	25.6144	617.38	1.24953	1.81013	5.11568	0.722594	0.160613	0.520602	0.0381287	11.0116	0.196805	7.85489	0.350562	25.5698	614.277	1.11841	1.61351	11.0116	0.869271	0.0970473	0.389543	1.7e-06	15	136	s
522	55	22	3.76619	0.692124	2.68336	4.78829	843.222	260.27	10.621	0.746393	1.30677	0.0241409	4.24022	0.514249	5.3646	0.451474	30.0726	849.61	1.15218	1.71355	4.24022	0.688794	0.122518	0.447658	0.0405827	5.64516	0.250535	4.76613	0.35532	29	793.025	1.00705	1.45471	5.64516	0.717739	0.121469	0.414115	1.59e-06	13	190	s
523	165	50	7.31153	2.69064	2.83584	11.7729	901.228	257.035	24.9513	0.932088	-0.184684	0.0377573	2.65739	0.533751	3.84975	0.561217	31.5478	937.326	1.07514	1.54862	2.65739	0.598828	0.13528	0.448599	0.0389803	4.85714	0.11707	3.75058	0.471179	31.563	941.885	0.973159	1.50031	4.85714	0.664779	0.130439	0.434616	1.06e-06	8	274	s
524	380	85	10.9899	3.52896	4.0704	17.0094	373.674	308.597	33.2204	0.844679	-0.502384	0.0310972	3.77826	0.853802	13.9217	0.539898	32.4902	1021.19	1.29263	1.78872	3.77826	0.665867	0.251673	0.634416	0.025672	8.34539	0.699167	14.8705	0.445957	32.3783	1013.26	1.29578	1.81103	8.34539	0.803857	0.179012	0.547333	1.29e-06	8	457	s
525	149	49	6.91674	2.89846	2.19518	11.2867	326.751	344.894	26.0298	0.948508	-1.56357	0.0186462	3.89844	0.784555	10.0474	0.459191	32.5977	1012.31	1.29236	1.81627	3.89844	0.67645	0.224836	0.607264	0.0228108	9.80583	0.445055	9.83495	0.33558	32	972.891	1.22083	1.72626	9.80583	0.816637	0.175852	0.53208	1.31e-06	10	209	s
526	53	21	3.66239	0.246623	3.18514	4.04762	337.683	351.329	8.496	0.33668	-0.994465	0.118865	1.15029	0.311715	1.83562	0.653757	38.5029	1426.16	0.767408	1.08983	1.15029	0.465473	0.0717754	0.279161	0.0964506	2.27778	-0.0892989	2.04552	0.527778	38.6111	1437.33	0.724096	1.10276	2.27778	0.565226	0.0542488	0.244211	1.37e-06	10	69	s
527	137	38	6.35718	1.29527	4.47368	8.72161	365.777	376.473	17.7315	0.796441	-0.859016	0.0238932	3.45625	0.706198	6.88194	0.496099	33.2687	1047.62	1.21342	1.73719	3.45625	0.654469	0.172201	0.528349	0.0202268	9.02857	0.303721	7.48345	0.314549	33.2381	1044.92	1.17544	1.77764	9.02857	0.792936	0.132224	0.471711	1.5e-06	8	227	s
528	169	56	8.82063	4.25646	1.74452	15.6333	304.448	408.846	35.086	0.98014	-0.766967	0.0258372	3.52715	0.614728	5.57747	0.47813	32.8126	1017.31	1.14988	1.68327	3.52715	0.651455	0.123376	0.445586	0.025316	6.33613	0.253875	5.24603	0.381214	32.8739	1021.97	1.07269	1.68164	6.33613	0.752491	0.0709155	0.341028	1.45e-06	10	333	s
529	139	38	6.279	1.0444	4.3358	8.24999	307.193	389.271	17.2151	0.754398	0.40461	0.0248347	3.98569	0.704369	7.74097	0.466304	29.7117	833.451	1.24286	1.76046	3.98569	0.67749	0.182559	0.545796	0.0317825	8.79798	0.234761	6.74852	0.378727	28.6162	771.143	1.10349	1.64111	8.79798	0.815039	0.0929425	0.384479	1.4e-06	7	187	s
530	48	21	3.45003	0.626138	2.38856	4.41216	293.154	399.503	9.63513	0.747337	0.103164	0.0535714	1.97403	0.524961	3.07775	0.576988	36.026	1234.01	0.987747	1.41225	1.97403	0.553493	0.144779	0.444768	0.0535077	3.41379	0.056988	2.81005	0.441988	36.0345	1242.13	0.844934	1.34292	3.41379	0.621221	0.120903	0.398375	1.39e-06	8	67	s
531	178	56	6.9402	2.8774	0.482473	11.4213	273.808	407.923	23.455	0.849129	-0.530689	0.0207786	4.01307	0.804435	11.2602	0.485744	31.8431	971.034	1.28161	1.80775	4.01307	0.683571	0.213523	0.592348	0.0231457	7.48361	0.635628	11.2692	0.381501	31.4672	947.031	1.24408	1.77094	7.48361	0.786957	0.190848	0.558365	1.36e-06	8	220	s
532	192	48	7.59423	2.22916	2.95525	11.0295	370.301	399.963	22.9525	0.854101	-0.450717	0.0216254	3.91056	0.694597	7.4023	0.490739	29.9721	846.648	1.2502	1.79181	3.91056	0.678931	0.189324	0.559023	0.0184542	7.32414	0.410813	7.21546	0.35929	29.7241	831.112	1.20092	1.80237	7.32414	0.768018	0.117648	0.449134	1.55e-06	6	230	s
533	136	40	6.18512	1.31834	2.86466	8.88855	345.1	413.499	16.8285	0.731525	1.00895	0.0266774	4.90063	0.670165	8.42891	0.441329	28.8076	784.817	1.23947	1.76922	4.90063	0.72126	0.171835	0.531916	0.024072	13.5413	0.20537	9.52049	0.347546	28.8624	787.25	1.17286	1.7485	13.5413	0.907702	0.111163	0.431289	1.53e-06	9	387	s
534	197	47	7.54036	1.34207	4.62662	9.76431	339.541	425.018	17.9398	0.371309	-0.810296	0.0258338	3.38462	0.779028	8.65846	0.521867	30.6439	890.028	1.27078	1.7565	3.38462	0.659259	0.233143	0.609061	0.0214875	7.43791	0.523284	8.80119	0.38468	30.3399	870.59	1.23964	1.80961	7.43791	0.796949	0.164162	0.525818	1.54e-06	10	387	s
535	183	47	7.23753	1.59169	3.55497	9.52821	266.287	434.352	19.8489	0.747858	1.4384	0.0161526	6.00924	0.609689	8.69802	0.423391	28.2219	750.897	1.27538	1.89332	6.00924	0.754902	0.148458	0.511718	0.0152195	12.3676	0.238995	9.12587	0.278546	27.7647	724.933	1.21669	1.89029	12.3676	0.881955	0.101952	0.428696	1.46e-06	13	228	s
536	78	26	4.67208	1.00962	2.80769	6.02227	240.802	426.948	13.904	0.816043	0.782811	0.0265282	7.10687	0.671175	11.8065	0.417312	28.7786	793.846	1.25178	1.78701	7.10687	0.78979	0.160214	0.517164	0.0308802	14	0.257114	10.4227	0.330441	27.9615	744.481	1.114	1.59742	14	0.88978	0.283949	0.640775	1.34e-06	11	932	s
537	165	51	7.24632	2.11997	2.72182	10.7838	238.157	444.35	21.1559	0.827436	-1.37103	0.0204278	4.08627	0.7854	10.5206	0.457842	29.5123	830.37	1.29223	1.80594	4.08627	0.680451	0.21776	0.597334	0.0226082	9.71311	0.506765	10.8463	0.342919	29.0902	805.521	1.2361	1.71568	9.71311	0.827096	0.140948	0.478611	1.43e-06	14	932	s
538	271	66	9.45759	3.19328	3.25334	14.8092	227.783	464.694	31.0704	0.910542	-0.822598	0.0237951	3.88613	0.73016	8.2008	0.486233	28.7723	781.122	1.27307	1.80463	3.88613	0.678475	0.1892	0.560499	0.0164305	8.93953	0.390946	8.33886	0.349309	28.6419	771.245	1.2406	1.8924	8.93953	0.832724	0.110016	0.444671	1.5e-06	15	932	s
539	82	27	4.73051	0.663192	3.53776	5.85607	208.484	474.006	12.8778	0.711469	-0.874516	0.0187037	7.39928	0.647946	11.5087	0.387587	28.9676	800.802	1.28791	1.87933	7.39928	0.782465	0.172306	0.546232	0.0449246	13.2963	0.229399	9.62723	0.337601	28.4815	771.863	1.08349	1.50863	13.2963	0.853899	0.150126	0.466037	1.48e-06	15	96	s
540	82	28	4.69873	0.59636	3.65404	5.95776	213.278	488.79	12.1947	0.603301	-1.08111	0.0244828	8.52899	0.593025	11.4785	0.386582	27.1159	701.324	1.27143	1.84201	8.52899	0.812565	0.147522	0.504241	0.0233056	21.3492	0.151772	13.5846	0.278711	27.7937	736.733	1.19019	1.73782	21.3492	0.955885	0.129753	0.462885	1.56e-06	17	932	s
541	102	30	5.42543	0.950593	3.85069	6.88678	261.488	704.316	15.2824	0.786124	-0.761337	0.037747	6.69602	0.642337	10.3608	0.436814	27.2131	706	1.22744	1.78416	6.69602	0.779451	0.147648	0.497548	0.0224204	18.7368	0.175373	12.3608	0.268667	26.6316	674.863	1.17266	1.74447	18.7368	0.925118	0.168021	0.5233	1.52e-06	13	1417	s
542	443	100	11.363	4.63111	0.666408	18.3282	249.974	640.264	38.7088	0.855181	1.46792	0.0225178	3.62477	0.815797	10.8391	0.514323	29.1507	811.764	1.29336	1.80418	3.62477	0.669581	0.230752	0.612684	0.0207741	8.57386	0.558801	10.7165	0.377107	28.767	786.175	1.27372	1.87394	8.57386	0.827491	0.118225	0.458036	1.92e-06	18	637	s
543	59	23	3.88051	0.43941	3.04472	4.56936	28.024	732.114	9.56078	0.397593	-0.429073	0.0263577	6.53093	0.527502	7.91106	0.385549	28.5515	770.526	1.17615	1.74066	6.53093	0.762983	0.141767	0.48296	0.0302433	11.3333	0.0794617	7.15582	0.285676	28.3077	753.972	1.09221	1.58902	11.3333	0.805696	0.154277	0.482996	7.18e-07	9	94	s
544	97	30	5.09918	0.498394	4.03113	6.03738	8.84726	740.542	12.927	0.573357	-0.765802	0.0259645	5.32335	0.662647	8.88988	0.447147	28.3593	761.741	1.23909	1.76005	5.32335	0.72066	0.190341	0.556269	0.0289855	11.7971	0.218549	8.5482	0.318987	27.7391	725.698	1.14397	1.63712	11.7971	0.845591	0.191151	0.540826	5.43e-07	4	122	s
545	91	32	5.00065	1.25833	3.00585	7.10001	26.1787	752.992	15.2892	0.8222	-0.21811	0.0270719	5.26384	0.718576	10.3522	0.461456	29.3355	820.597	1.2561	1.73383	5.26384	0.725347	0.202932	0.569222	0.0297291	12.6061	0.340016	10.5503	0.317263	29.3636	818.537	1.2044	1.65537	12.6061	0.878051	0.116201	0.429788	5.57e-07	5	124	s
546	106	32	5.37341	0.868564	3.9406	6.92574	584.523	710.28	14.849	0.726289	0.105081	0.0217385	5.85246	0.719353	11.4267	0.428169	26.4536	670.479	1.26179	1.82723	5.85246	0.732648	0.189478	0.563749	0.0356834	9.33824	0.435493	9.27114	0.37529	25.75	628.842	1.15131	1.57752	9.33824	0.832868	0.190187	0.531217	1.55e-06	16	294	s
547	79	26	4.57373	0.429552	3.80944	5.31076	587.392	730.156	10.8141	0.225729	1.04137	0.0387057	6.73134	0.631951	10.1446	0.425957	25.6493	626.919	1.21421	1.73119	6.73134	0.787601	0.163432	0.514942	0.0306953	13.9808	0.129171	9.02727	0.291224	24.7885	578.295	1.12063	1.59811	13.9808	0.910895	0.164913	0.499663	1.32e-06	11	216	s
548	115	34	5.66407	0.867824	3.97277	7.36969	565.306	717.61	15.3187	0.707684	1.06827	0.0370508	5.0804	0.602352	7.38806	0.494068	25.7638	625.188	1.17284	1.6428	5.0804	0.716906	0.185331	0.533911	0.0554017	7.53947	0.135326	5.35972	0.393819	24.4079	557.424	1.00865	1.43325	7.53947	0.780563	0.117634	0.404978	1.51e-06	17	159	s
549	57	23	3.82764	0.647388	2.17087	4.75665	595.228	614.675	10.2956	0.703011	-1.073	0.0361313	3.66129	0.442907	4.28607	0.461517	32.8333	1018.92	1.06175	1.57651	3.66129	0.660063	0.085258	0.361919	0.0408163	7.65714	0.0299897	4.94694	0.353703	32.5714	1004.76	1.00205	1.47948	7.65714	0.783421	0.147659	0.458387	1.89e-06	12	263	s
550	65	27	4.14663	1.14946	2.38882	5.86602	618.793	663.398	12.9424	0.855173	0.0367295	0.0322357	4.56808	0.367149	4.60912	0.438311	28.5775	765.325	1.09189	1.63776	4.56808	0.704722	0.073126	0.341895	0.0312314	7.07317	0.0702221	4.80369	0.293143	29.1707	801.515	1.00385	1.56231	7.07317	0.71798	0.155126	0.48068	1.78e-06	14	97	s
551	93	29	5.00323	0.506631	3.99836	5.85933	630.552	650.149	12.4229	0.556421	-0.164832	0.0210002	6.18809	0.646617	9.75549	0.448874	28	743.6	1.26489	1.82045	6.18809	0.761639	0.163199	0.52572	0.0211834	12.7538	0.239176	9.3816	0.289136	27.5231	713.942	1.19496	1.7463	12.7538	0.870491	0.12124	0.44921	1.79e-06	17	128	s
552	64	24	4.18422	0.908636	2.69258	5.59017	588.647	665.767	12.2877	0.820593	-1.09998	0.0318614	5.43602	0.499297	6.42839	0.463665	27.3981	706.574	1.12462	1.65347	5.43602	0.72488	0.12619	0.446818	0.0609756	9.82927	0.0193192	6.01145	0.349375	27.6829	723.371	0.977977	1.37982	9.82927	0.811565	0.140276	0.433497	1.83e-06	16	319	s
553	120	38	5.83629	1.71659	2.86842	8.21529	668.078	713.893	18.4499	0.866957	1.5313	0.0241896	7.37198	0.557276	9.32571	0.43116	26.4831	663.624	1.23051	1.79326	7.37198	0.793861	0.135676	0.479297	0.0286028	17.2045	0.0533062	10.0866	0.280591	26.25	648.24	1.16817	1.64596	17.2045	0.928382	0.0815425	0.361348	1.22e-06	11	238	s
554	60	23	3.92182	0.406946	3.04627	4.60829	676.14	714.07	9.6813	0.461139	-1.31099	0.0306984	5.50505	0.503408	6.54283	0.447877	27.202	694.141	1.17368	1.6713	5.50505	0.728926	0.137474	0.467589	0.0558843	11.641	-0.0102705	6.76134	0.39951	26.9231	682.492	1.01771	1.36144	11.641	0.78585	0.208446	0.521083	1.19e-06	11	238	s
555	103	32	5.39293	1.32779	3.17168	7.55791	675.215	668.401	15.3361	0.772982	0.605363	0.0226022	6.04261	0.473451	6.73794	0.4522	27.6506	716.8	1.19511	1.79755	6.04261	0.757187	0.127669	0.466267	0.0272847	7.73077	0.312906	6.6257	0.362047	28.2949	752.742	1.12927	1.66372	7.73077	0.778029	0.147871	0.483009	1.57e-06	16	240	s
556	45	19	3.38338	0.406145	2.73735	4.11907	685.392	679.117	8.76011	0.623443	0.532833	0.0292004	4.625	0.411596	4.93012	0.404303	28.9583	787.993	1.08546	1.6369	4.625	0.684132	0.0979076	0.393803	0.0613905	9.5	0.00611313	5.77922	0.364008	29.1923	809.42	0.911513	1.29781	9.5	0.752484	0.120133	0.390955	1.48e-06	15	240	s
557	71	28	4.34172	1.06677	2.65466	5.73	691.532	690.617	13.2273	0.813193	0.00658508	0.0367587	9.9234	0.42882	9.68675	0.380478	24.6979	577.039	1.19862	1.7719	9.9234	0.84879	0.115442	0.441742	0.0302169	14.5	-0.197304	7.05527	0.216555	24.2273	547.019	1.04759	1.6126	14.5	0.894141	0.176875	0.518341	1.37e-06	14	103	s
558	135	40	6.18842	1.97001	1.17154	9.07042	713.155	692.063	19.2786	0.843765	-1.55619	0.0186939	4.2618	0.649012	7.07116	0.430914	29.1073	797.256	1.22839	1.80616	4.2618	0.677531	0.147005	0.499172	0.0264994	9.34694	0.181173	6.70752	0.331955	28.9184	786.37	1.11752	1.6586	9.34694	0.833923	0.0634363	0.320884	1.3e-06	11	218	s
559	99	31	5.26122	0.997965	3.27765	6.87218	750.357	684.609	14.2408	0.717728	-0.76742	0.0268358	5.20059	0.595686	7.43138	0.460575	26.4513	656.676	1.22929	1.78204	5.20059	0.728264	0.155617	0.509617	0.0337235	11.8592	0.178728	8.22	0.347524	26.3662	655.161	1.10475	1.60096	11.8592	0.862543	0.15161	0.480597	1.27e-06	11	135	s
560	85	32	4.93005	1.8193	1.5239	7.64917	467.256	717.819	17.2683	0.906371	-1.05853	0.0205418	6.17794	0.475539	6.88979	0.378209	27.1317	690.441	1.18828	1.79284	6.17794	0.754263	0.102745	0.420109	0.0301783	11.0556	0.0130872	6.60108	0.305047	26.7222	669.455	1.06864	1.5728	11.0556	0.861202	0.0925432	0.376216	1.33e-06	8	300	s
561	105	36	5.31734	1.35252	2.25017	7.5577	788.988	699.127	15.1387	0.729437	0.594159	0.0221208	4.1264	0.542862	5.5133	0.43027	30.4073	869.567	1.15597	1.73289	4.1264	0.671149	0.109213	0.425935	0.0416667	7.77778	0.136099	5.50154	0.349454	30.2222	861.725	1.0418	1.47455	7.77778	0.75578	0.0713948	0.321596	1.08e-06	10	150	s
562	69	25	4.26246	0.543501	3.19625	5.27788	791.85	716.725	11.3461	0.655206	-0.99822	0.0227883	6.3	0.581145	8.52051	0.382395	29.2565	810.167	1.21396	1.77958	6.3	0.756682	0.132201	0.471898	0.0301235	13.9778	0.0552561	8.39765	0.275296	29.1778	801.403	1.14582	1.59549	13.9778	0.834782	0.162182	0.495399	9.36e-07	7	176	s
563	74	28	4.44681	1.01964	2.68071	6.0392	758.002	719.236	13.1597	0.781898	-0.189252	0.036197	8.26016	0.50979	9.42513	0.418293	26.4309	662.38	1.19324	1.68777	8.26016	0.795001	0.155749	0.498033	0.0432322	12.0426	-0.0180635	6.91444	0.321226	25.9574	632.26	1.0447	1.47266	12.0426	0.843156	0.122777	0.418589	9.6e-07	8	127	s
564	58	22	3.86685	0.385628	3.18214	4.5165	792.069	737.843	9.66677	0.497666	-0.577837	0.030605	7.90576	0.50924	9.0546	0.390761	25.4869	614.815	1.18667	1.74034	7.90576	0.789168	0.153574	0.501361	0.0509259	14.9444	0.154088	9.83333	0.316594	25.3333	609.341	1.065	1.42251	14.9444	0.833508	0.0941567	0.362112	7.49e-07	6	100	s
565	55	22	3.79582	0.722168	2.53651	4.94306	812.676	733.003	10.8793	0.774371	-0.401215	0.0533847	5.78212	0.482078	6.58204	0.453615	28.0838	745.57	1.08336	1.55578	5.78212	0.742904	0.104616	0.397245	0.074707	7.875	0.170882	5.74902	0.389853	27.9375	743.724	0.870862	1.18879	7.875	0.747268	0.140188	0.405063	7.7e-07	5	82	s
566	40	18	3.13999	0.442719	2.54951	3.80789	757.441	601.454	8.39504	0.67159	0.272577	0.0428319	2.66667	0.429111	3.33554	0.519026	33.4444	1059.94	0.990477	1.43502	2.66667	0.598338	0.0966445	0.36825	0.0761834	5.38462	-0.066198	3.52515	0.362896	34.2308	1118.36	0.859525	1.14446	5.38462	0.672367	0.0345983	0.198727	1.52e-06	13	171	s
567	106	32	5.35913	0.806714	3.5625	6.52429	786.539	625.974	14.8589	0.71432	-1.37279	0.018565	5.64033	0.719313	11.0473	0.383247	25.5259	620.809	1.31307	1.87843	5.64033	0.729404	0.195978	0.57888	0.0206404	13.5694	0.300557	10.7002	0.278767	24.0694	547.657	1.21281	1.74489	13.5694	0.885784	0.125266	0.456059	1.41e-06	14	149	s
568	70	28	4.37459	1.21036	2.57143	6.20237	12.0559	5.41063	13.6242	0.868469	-0.136126	0.079603	1.51304	0.371486	2.20367	0.611458	33.9478	1097.76	0.865297	1.2161	1.51304	0.497893	0.0821946	0.31463	0.0840625	2.3	-0.156505	1.99438	0.45	33.15	1054.65	0.700503	1.15131	2.3	0.498357	0.0938381	0.327364	2.41e-07	4	2978	c
569	443	73	11.5644	2.54578	5.93252	16.3741	337.028	12.8635	32.0036	0.808902	-0.0828074	0.144861	0.547895	0.692567	1.89108	0.78975	25.4082	607.625	0.819393	1.0032	0.547895	0.357423	0.263152	0.511989	0.121977	0.893899	0.4415	1.80027	0.702653	25.3183	604.34	0.781941	1.05727	0.893899	0.427524	0.0976624	0.320737	4.8e-07	5	215485	c
570	415	84	11.0409	2.01274	6.17604	15.7978	103.834	19.4104	28.1216	0.699193	1.21473	0.185516	0.471211	0.593812	1.58004	0.792191	35.8901	1238.7	0.721206	0.878994	0.471211	0.330156	0.192538	0.413253	0.139853	0.905882	0.241148	1.59688	0.674118	35.8882	1240.57	0.687536	0.969035	0.905882	0.41561	0.0291455	0.168089	5.57e-07	10	215485	c
571	316	65	10.0585	2.22149	6.37172	14.5929	247.117	16.1438	26.7902	0.800561	-0.0362806	0.0689052	1.27439	0.716607	3.24845	0.660251	30.3354	866.026	1.03849	1.36908	1.27439	0.484787	0.224122	0.540536	0.051488	2.712	0.38623	3.2093	0.520311	30.104	854.012	0.985509	1.44595	2.712	0.6061	0.089052	0.355076	5.17e-07	5	215485	c
572	638	108	13.8006	2.31364	8.52201	17.8501	307.082	25.7199	33.0213	0.57901	0.580664	0.0501083	1.49722	0.748072	3.97152	0.621806	32.0424	969.272	1.07653	1.46501	1.49722	0.506475	0.210776	0.540275	0.0442454	3.15084	0.479325	4.02572	0.505078	31.9628	965.949	1.02739	1.53319	3.15084	0.637847	0.0988668	0.383927	5.64e-07	8	215485	c
573	79	29	4.59885	1.05006	2.66322	6.3726	129.131	15.1669	12.9586	0.77687	0.376538	0.299142	0.340909	0.433854	1.30108	0.838636	37.1515	1342.79	0.519211	0.629304	0.340909	0.287195	0.126633	0.285585	0.24536	0.382979	0.387844	1.31281	0.808511	36.9362	1324.95	0.54827	0.663558	0.382979	0.289025	0.117972	0.282527	5.56e-07	11	215485	c
574	766	108	15.6656	2.90436	11.3418	22.6693	83.669	31.372	41.4758	0.778352	0.583441	0.0395278	1.24635	0.868918	5.75407	0.656381	30.1858	858.444	1.19142	1.53064	1.24635	0.477471	0.329054	0.672866	0.02973	3.00448	0.66292	5.45663	0.523584	29.8774	839.394	1.16207	1.66032	3.00448	0.630666	0.159623	0.500248	5.83e-07	9	215485	c
575	322	62	9.90398	2.31629	5.75137	13.8581	174.077	26.6841	27.607	0.825326	0.316393	0.0374007	2.12214	0.707482	4.62737	0.573129	29.7795	832.881	1.13522	1.56516	2.12214	0.567759	0.200881	0.543112	0.0290566	4.63774	0.34462	4.5382	0.460043	29.634	824.588	1.08448	1.65151	4.63774	0.693296	0.0994715	0.398445	6.3e-07	8	400	c
576	242	76	9.42812	4.22387	1.27469	16.8911	149.489	32.8639	34.5388	0.937179	0.806527	0.0454679	1.8762	0.674009	3.87769	0.580151	33.5084	1063.01	1.05261	1.45158	1.8762	0.547452	0.165079	0.479438	0.0396367	3.96648	0.351337	4.05743	0.462772	33.6425	1073.33	1.00704	1.50371	3.96648	0.669898	0.0829328	0.349276	6.79e-07	10	215485	c
577	202	49	7.63956	1.30815	5.48536	10.7584	28.5844	28.0036	18.857	0.64666	0.421387	0.117434	0.708738	0.649527	2.01112	0.737171	26.7503	674.294	0.84748	1.08161	0.708738	0.390082	0.201954	0.46444	0.0846042	1.20915	0.406411	2.01851	0.60719	26.8954	682.838	0.819124	1.16196	1.20915	0.44566	0.0868545	0.316431	3.72e-07	4	215485	c
578	153	43	6.44215	1.31432	3.57694	8.74864	42.1455	29.3266	17.5529	0.736069	1.36657	0.0699939	0.928972	0.710403	2.6039	0.679065	26.3907	652.657	0.951111	1.23457	0.928972	0.419078	0.224163	0.517477	0.0554746	2.23664	0.339664	2.69356	0.512663	26.4504	656.717	0.91257	1.34209	2.23664	0.557882	0.0586575	0.279107	4.31e-07	7	215485	c
579	51	28	3.56242	1.15692	0.386309	5.17611	135.968	28.5294	10.6027	0.73099	0.463691	0.308884	0.318182	0.328976	1.23709	0.840909	36.7727	1319.24	0.460126	0.555908	0.318182	0.271647	0.0811913	0.214372	0.356771	0.458333	-0.16044	1.19748	0.770833	36.5417	1309.2	0.363316	0.501288	0.458333	0.29952	0.0238222	0.109604	6.48e-07	12	215485	c
580	51	28	3.56242	1.15692	0.386309	5.17611	135.968	28.5294	10.6027	0.73099	0.463691	0.308884	0.318182	0.328976	1.23709	0.840909	36.7727	1319.24	0.460126	0.555908	0.318182	0.271647	0.0811913	0.214372	0.356771	0.458333	-0.16044	1.19748	0.770833	36.5417	1309.2	0.363316	0.501288	0.458333	0.29952	0.0238222	0.109604	6.48e-07	12	215485	c
581	172	52	7.3523	1.60592	4.08318	11.4076	121.776	33.2973	18.7328	0.690521	0.220211	0.177963	0.539384	0.394748	1.44559	0.750856	36.3339	1275.36	0.639177	0.814804	0.539384	0.333121	0.104581	0.293241	0.16906	0.729323	0.185569	1.44775	0.689474	36.5188	1290.92	0.604223	0.834767	0.729323	0.362643	0.0412123	0.185787	6.69e-07	13	215485	c
582	170	45	6.90555	1.49215	3.58054	9.11154	134.793	45.8057	18.5737	0.738139	0.930994	0.156155	0.731219	0.431804	1.64346	0.736561	35.6294	1219.83	0.729701	0.964804	0.731219	0.396114	0.0997609	0.310388	0.137091	1.34586	-0.0205989	1.65935	0.633835	35.6617	1226	0.665878	1.01025	1.34586	0.491099	0.012834	0.113862	7.57e-07	16	215485	c
583	224	58	8.25569	2.35077	2.82359	12.5783	172.247	48.9146	24.0076	0.803826	1.25211	0.0403973	1.96396	0.666528	3.94472	0.594793	32.4916	997.216	1.06869	1.48927	1.96396	0.555563	0.16825	0.489237	0.0340434	3.1227	0.457833	3.87983	0.466927	32.3865	991.972	1.0245	1.53973	3.1227	0.62049	0.105476	0.396931	7.75e-07	11	215485	c
584	219	60	7.83594	2.62206	2.21121	12.4254	19.4281	51.7296	24.693	0.847131	0.669402	0.0794292	0.869001	0.639206	2.20429	0.677562	34.1971	1112.85	0.896934	1.17415	0.869001	0.406084	0.176968	0.451487	0.0677083	1.625	0.329116	2.21109	0.593803	33.9702	1100.83	0.840071	1.24606	1.625	0.520481	0.0707635	0.295561	4.08e-07	6	2978	c
585	154	42	6.70612	1.33809	4.63675	9.32096	159.23	48.9562	18.6431	0.784917	-0.0214747	0.0303328	2.85448	0.711751	5.95141	0.520024	29.194	801.474	1.18469	1.67164	2.85448	0.614983	0.189777	0.543749	0.0318576	5.70642	0.315642	5.16918	0.414141	28.6789	772.273	1.08718	1.59439	5.70642	0.733518	0.153426	0.482444	7.8e-07	13	215485	c
586	337	74	10.0654	2.93992	3.94948	14.4514	201.058	54.0777	30.5326	0.861671	0.0675465	0.117449	0.572131	0.710617	1.98854	0.776885	35.1279	1179.56	0.832346	1.02416	0.572131	0.362586	0.258779	0.512297	0.107433	0.989324	0.51087	2.01131	0.697509	34.968	1169.39	0.816291	1.06886	0.989324	0.447715	0.128678	0.369733	7.88e-07	10	215485	c
587	96	30	5.12242	1.14003	2.62573	6.84308	207.328	75.2062	13.3595	0.651378	-0.85778	0.251729	0.37963	0.430356	1.33322	0.810185	33.5216	1085.71	0.586012	0.700292	0.37963	0.288321	0.126855	0.30082	0.164256	0.681818	0.227669	1.4414	0.695455	33.6212	1090.39	0.616643	0.835841	0.681818	0.345721	0.0447099	0.193658	8.96e-07	13	215485	c
588	96	30	5.12242	1.14003	2.62573	6.84308	207.328	75.2062	13.3595	0.651378	-0.85778	0.251729	0.37963	0.430356	1.33322	0.810185	33.5216	1085.71	0.586012	0.700292	0.37963	0.288321	0.126855	0.30082	0.164256	0.681818	0.227669	1.4414	0.695455	33.6212	1090.39	0.616643	0.835841	0.681818	0.345721	0.0447099	0.193658	8.96e-07	13	215485	c
589	244	57	8.61592	2.0582	4.80167	12.7163	162.56	81.5914	23.9531	0.813164	0.57172	0.144967	0.565865	0.54505	1.6219	0.758305	35.4456	1206.07	0.744751	0.937052	0.565865	0.352695	0.15125	0.377026	0.143669	0.84127	0.200144	1.52589	0.687302	35.381	1206.69	0.661726	0.925801	0.84127	0.404622	0.0245079	0.150696	9.52e-07	13	215485	c
590	46	19	3.3995	0.526475	1.93524	4.26835	226.19	79.2949	8.67892	0.595723	-1.23361	0.191986	0.6	0.343738	1.45713	0.733103	33.6207	1088.28	0.650257	0.850026	0.6	0.347544	0.0797385	0.261075	0.253903	1.18182	-0.0756373	1.54936	0.663636	34.2121	1136.14	0.520475	0.693795	1.18182	0.473065	0.0402531	0.167627	9.04e-07	15	215485	c
591	494	91	11.9127	2.7414	3.88733	16.9301	324.367	89.3358	31.7291	0.733943	-0.81447	0.0896933	0.956522	0.562194	2.0924	0.67356	33.519	1068.8	0.878654	1.17862	0.956522	0.429088	0.134188	0.394891	0.0733568	1.85401	0.193433	2.14932	0.562473	33.3869	1062.68	0.830268	1.26861	1.85401	0.538199	0.0220197	0.166884	9.33e-07	11	215485	c
592	105	39	5.36943	1.35301	2.67565	7.77769	256.206	84.6503	15.2934	0.780803	-1.37579	0.175501	0.643059	0.523621	1.67495	0.760057	34.7394	1159.94	0.711672	0.920855	0.643059	0.377555	0.16585	0.391671	0.226667	0.786667	0.125926	1.45	0.702667	35	1187.86	0.549368	0.759946	0.786667	0.387407	0.0355031	0.164603	9.14e-07	15	215485	c
593	134	44	5.96796	1.48898	2.07429	8.22872	267.758	85.1791	15.2642	0.490789	-1.30205	0.0907561	1.41087	0.37215	2.12357	0.620345	32.637	1015.16	0.823755	1.16857	1.41087	0.498633	0.0621948	0.268826	0.140074	1.86022	0.109555	2.04454	0.597407	32.6344	1019.83	0.735952	1.09419	1.86022	0.552362	0.0276621	0.173856	9.13e-07	16	215485	c
594	728	116	16.4594	6.06601	7.37892	29.0158	366.158	91.8532	52.3562	0.926545	-0.176444	0.0369992	1.25009	0.881651	6.2814	0.658957	28.6446	773.051	1.20052	1.53987	1.25009	0.484975	0.341337	0.685141	0.0286257	3.28931	0.688452	6.27898	0.546983	28.6069	770.153	1.17836	1.66438	3.28931	0.647811	0.180537	0.530368	9.58e-07	14	215485	c
595	70	26	4.44767	1.12038	2.54225	6.3125	222.728	89.6141	13.1484	0.846427	0.809751	0.242543	0.956522	0.405559	1.80456	0.719386	33.6783	1092.13	0.665059	0.890964	0.956522	0.434906	0.10081	0.300417	0.272813	0.5	0.229287	1.32438	0.78	33.95	1116.15	0.553164	0.724209	0.5	0.337418	0.0493981	0.189779	9.5e-07	16	215485	c
596	79	44	4.59048	1.36261	1.2258	6.90868	235.121	92.2142	12.4257	0.609936	1.27402	0.0802328	1.3195	0.31071	1.95715	0.619087	34.8382	1161.26	0.797767	1.13969	1.3195	0.476809	0.043537	0.222392	0.100777	2.65385	-0.163424	2.14053	0.503846	35.2308	1191.53	0.73981	1.09522	2.65385	0.584469	0.0342937	0.193632	9.53e-07	15	215485	c
597	127	49	6.02869	1.44989	2.8467	8.63557	173.431	96.5874	15.3556	0.545947	0.832413	0.144203	0.568019	0.495349	1.56278	0.753222	36.043	1251.46	0.690753	0.874199	0.568019	0.350272	0.127741	0.335336	0.114371	1.10714	0.113834	1.62468	0.632143	35.9643	1247.2	0.668321	0.947418	1.10714	0.437148	0.00688856	0.0807929	1.01e-06	14	215485	c
598	146	46	6.79568	2.34758	2.48102	10.6558	263.605	97.5973	22.2278	0.911717	0.236292	0.073782	1.42744	0.520614	2.48882	0.617612	33.3439	1055.55	0.924504	1.28655	1.42744	0.500782	0.113291	0.378369	0.0654098	2.8125	0.0775868	2.52453	0.527444	33.6339	1077.73	0.855267	1.32446	2.8125	0.614643	0.0424504	0.236272	9.64e-07	17	215485	c
599	339	65	10.0165	1.71347	6.34729	12.8821	307.691	108.586	25.5761	0.696839	-0.404275	0.0417843	1.88116	0.767031	5.03737	0.609665	30.6314	884.009	1.13999	1.55241	1.88116	0.539824	0.23471	0.58156	0.039723	3.07719	0.618977	5.03807	0.530241	30.6	882.871	1.10769	1.60851	3.07719	0.624881	0.16782	0.505192	1.01e-06	14	215485	c
600	235	67	8.45827	2.08853	3.69634	12.9242	168.267	111.314	22.2974	0.704967	0.769588	0.0821331	0.979319	0.570566	2.14024	0.670925	34.174	1112.07	0.880043	1.18304	0.979319	0.4349	0.138551	0.40184	0.0684568	1.95	0.172901	2.17882	0.556765	34.0833	1108.83	0.825854	1.2586	1.95	0.5465	0.0286766	0.189618	1.05e-06	11	215485	c
601	96	30	5.25053	1.09431	3.56854	7.14151	276.613	107.387	14.7121	0.811756	-0.633031	0.105861	1.39939	0.203662	1.87864	0.607622	31.8323	967.934	0.754688	1.11715	1.39939	0.489657	0.0291545	0.18031	0.103252	2.10448	-0.188526	1.88533	0.520896	31.8955	976.982	0.661806	1.04603	2.10448	0.542907	0.0619784	0.254392	9.96e-07	12	215485	c
602	211	59	7.74461	2.25515	3.11145	10.994	230.427	117.675	22.7425	0.780554	-0.789865	0.0665971	1.10583	0.793995	3.684	0.677716	33.5617	1067.58	1.03561	1.34232	1.10583	0.461184	0.273853	0.588922	0.0620701	2.19608	0.585125	3.64667	0.564014	33.3725	1056.77	0.993858	1.36257	2.19608	0.573839	0.213784	0.527552	1.03e-06	16	215485	c
603	128	41	6.31729	2.17803	2.73312	9.6642	202.67	114.381	21.0033	0.92181	0.442648	0.0921098	0.977221	0.497463	1.97229	0.664465	34.8679	1161.22	0.833927	1.11562	0.977221	0.427469	0.117514	0.360583	0.117202	1.29348	0.0836577	1.70578	0.588043	34.9457	1175.62	0.680632	1.00417	1.29348	0.448797	0.0614551	0.248361	1.04e-06	15	215485	c
604	169	59	7.31918	2.49282	1.08699	11.5059	219.04	127.166	22.9733	0.853657	1.20589	0.0611573	1.37368	0.596766	2.70333	0.63452	34.0649	1102.52	0.942677	1.30623	1.37368	0.495791	0.147321	0.433104	0.046941	4.00741	0.110029	3.25143	0.490555	34.2148	1112.12	0.941436	1.4211	4.00741	0.681731	0.041516	0.241805	1.06e-06	12	215485	c
605	761	126	15.3155	4.63805	4.91074	23.7006	283.414	129.239	45.0539	0.840052	-0.165637	0.0670946	1.36006	0.574056	2.59652	0.635252	32.1327	976.554	0.963323	1.3318	1.36006	0.487215	0.134976	0.418723	0.0570251	2.45625	0.176958	2.49218	0.520874	32.0063	972.286	0.881123	1.37069	2.45625	0.587446	0.0232633	0.178178	1.06e-06	11	215485	c
606	105	34	5.40372	0.946016	3.80698	7.30182	238.2	125.852	13.2036	0.512817	-1.00163	0.0600632	1.71148	0.56515	2.9679	0.581613	31.8179	956.793	0.985596	1.37905	1.71148	0.520628	0.140387	0.433552	0.0773892	3.19737	0.217308	3.04255	0.496791	31.8816	964.47	0.905822	1.24374	3.19737	0.639153	0.0779124	0.3097	1.05e-06	17	215485	c
607	186	50	7.56957	1.37404	5.04516	10.8855	583.588	127.998	20.1151	0.734818	-0.930138	0.0506335	1.8383	0.550008	3.0426	0.590147	32.2151	980.339	1.00599	1.41625	1.8383	0.537218	0.123558	0.412494	0.0415351	4.73381	0.0488165	3.48838	0.43066	32.0576	972.36	0.958671	1.50754	4.73381	0.685136	0.0387867	0.240595	1.15e-06	15	215485	s
608	254	61	9.2222	3.30802	2.81533	14.8161	205.18	134.816	30.1451	0.914985	0.420216	0.0942429	0.720751	0.673782	2.10471	0.715121	34.5817	1139.94	0.873462	1.1106	0.720751	0.384248	0.216805	0.486483	0.108592	0.876238	0.497537	1.87194	0.674752	34.5693	1143.28	0.795548	1.07307	0.876238	0.406017	0.126359	0.367082	1.08e-06	12	215485	c
609	120	46	6.03222	1.9666	1.06588	9.15834	235.848	136.59	17.3039	0.775193	-0.060186	0.0726703	1.44081	0.522315	2.50811	0.629871	35.073	1173.09	0.889785	1.23281	1.44081	0.501579	0.112125	0.369082	0.065	2.425	0.101748	2.34984	0.505735	35.225	1186.83	0.817741	1.25654	2.425	0.567491	0.0288801	0.190135	1.07e-06	16	215485	c
610	125	46	5.99427	1.26489	2.55192	9.20015	237.103	148.316	14.5313	0.522336	0.541999	0.248089	0.398551	0.3473	1.30531	0.812319	36.8575	1319.63	0.542094	0.672429	0.398551	0.305512	0.0795766	0.232814	0.270318	0.472527	0.0164635	1.24022	0.763736	36.8022	1322.5	0.442652	0.584897	0.472527	0.300374	0.000201068	0.0108448	1.08e-06	13	215485	c
611	78	29	4.64919	1.03668	2.9361	6.33817	961.92	192.522	13.8838	0.807488	-1.38175	0.0194839	7.73359	0.548465	9.56367	0.361482	25.8031	629.146	1.25468	1.86361	7.73359	0.797468	0.125987	0.470794	0.0480769	15.2692	0.0882834	9.37389	0.283686	25.3462	607.355	1.07418	1.46179	15.2692	0.888741	0.13686	0.439616	7.49e-07	11	4915	s
612	105	33	5.65393	1.54339	3.20267	7.9439	978.353	207.153	17.9826	0.881896	-0.939646	0.0157122	7.75487	0.607796	10.8863	0.389051	26.2953	655.143	1.32823	1.92625	7.75487	0.806339	0.160002	0.533541	0.019052	18.642	0.236307	13.2052	0.285625	26.716	677.477	1.274	1.8234	18.642	0.973089	0.184564	0.556581	5.89e-07	7	129	s
613	106	38	6.40867	2.77134	1.89492	10.4962	945.99	208.9	23.7502	0.966627	-0.665302	0.0203894	5.78632	0.560097	7.57682	0.422845	29.9801	848.449	1.20631	1.82858	5.78632	0.738014	0.129353	0.472699	0.0354938	9.79167	0.208748	7.18745	0.345182	30.0139	852.467	1.07414	1.58689	9.79167	0.807258	0.178	0.516332	8e-07	10	143	s
614	47	20	3.43052	0.411155	2.70416	4.20862	898.766	225.174	8.70274	0.554853	-0.450725	0.0378492	4.27152	0.368092	4.37986	0.42225	30.7483	891.555	1.0447	1.52867	4.27152	0.677591	0.0661144	0.315032	0.0702663	5.5	0.162141	4.28217	0.445505	30.4231	879.43	0.896798	1.25975	5.5	0.706706	0.0708343	0.297254	1e-06	12	69	s
615	133	40	6.32193	1.9933	2.64764	9.66488	954.336	229.404	20.2819	0.886202	-0.457683	0.0263313	2.62963	0.71896	5.67838	0.495785	31.8105	953.326	1.19605	1.66727	2.62963	0.59399	0.197827	0.553645	0.0232603	6.36275	0.477874	7.09311	0.358559	32.0098	968.248	1.18387	1.6852	6.36275	0.752378	0.140866	0.474735	6.76e-07	7	162	s
616	94	30	5.21768	1.1866	3.09857	7.03807	981.853	229.79	15.2053	0.834942	-0.622523	0.0301562	2.86875	0.629905	4.87569	0.511419	31.2688	919.942	1.1472	1.64424	2.86875	0.619961	0.151543	0.486124	0.0360078	4.51471	0.308272	4.26335	0.391794	31.0735	910.371	1.043	1.53639	4.51471	0.670377	0.130541	0.439442	5.09e-07	6	202	s
617	421	102	12.8965	5.47453	4.26736	23.2791	881.079	242.371	45.9591	0.943347	-0.417687	0.0186781	3.78776	0.685923	7.02998	0.471301	30.0339	849.41	1.24022	1.80938	3.78776	0.670055	0.154911	0.511869	0.0150701	8.21365	0.342986	7.25074	0.33081	29.9228	841.587	1.20356	1.88834	8.21365	0.808014	0.0590653	0.329501	9.9e-07	11	577	s
618	59	25	3.95882	1.08433	1.89526	5.86788	857.117	252.969	12.0105	0.820557	-0.188437	0.0167036	9.66842	0.401864	9.08213	0.33243	26.3211	652.033	1.23375	1.89696	9.66842	0.837392	0.0924297	0.409785	0.0322449	20.5714	-0.193634	9.61714	0.165018	26.4	656.664	1.04716	1.54953	20.5714	0.901334	0.175646	0.507913	1.02e-06	8	577	s
619	175	53	8.45845	3.82769	1.91609	14.4363	914.125	260.594	31.7014	0.967703	-0.59797	0.0197466	4.03827	0.606899	6.13643	0.431777	31.7621	951.301	1.18766	1.75344	4.03827	0.667235	0.117442	0.44328	0.0174852	9.40769	0.0992553	6.22217	0.269848	31.7769	951.16	1.12274	1.81728	9.40769	0.800027	0.0477359	0.29161	7.92e-07	6	264	s
620	102	32	5.44533	1.26117	2.93816	7.46712	971.32	271.948	15.8435	0.829219	-0.687697	0.0417402	2.26934	0.616135	3.95591	0.52852	33.8739	1086.38	1.05895	1.48246	2.26934	0.571374	0.143333	0.452308	0.0340577	5.35135	0.188974	4.29912	0.374304	33.7838	1081.05	1.024	1.52799	5.35135	0.706187	0.0846559	0.355452	5.11e-07	4	114	s
621	63	23	4.06852	0.411425	3.0602	4.75665	838.104	272.928	10.1307	0.589584	-0.698135	0.0706142	1.57416	0.444923	2.41797	0.5689	34.0526	1103.95	0.888632	1.26183	1.57416	0.493542	0.103096	0.358008	0.0779478	2.54762	0.00520199	2.28047	0.494258	34.4048	1133.28	0.778835	1.2111	2.54762	0.578465	0.0316547	0.19546	9.79e-07	8	84	s
622	77	29	4.61304	1.29273	2.41699	6.73748	868.993	272.699	14.2736	0.863157	0.307032	0.053154	2.30469	0.470433	3.17601	0.535743	33.3047	1051.68	0.97384	1.40813	2.30469	0.57456	0.0991508	0.369621	0.0596	4.64	0.0292887	3.39	0.450244	33	1036.61	0.880131	1.33175	4.64	0.708619	0.0725083	0.308771	9.1e-07	7	101	s
623	116	38	5.9363	1.96276	3.04138	9.01388	770.121	274.035	19.9719	0.91535	-0.325887	0.0284634	3.37215	0.66016	5.96138	0.491218	32.0506	970.826	1.15804	1.66386	3.37215	0.650722	0.162044	0.504251	0.0325968	5.28378	0.297403	4.76018	0.357399	31.4189	931.851	1.05291	1.57245	5.28378	0.698743	0.101064	0.392579	1.08e-06	10	134	s
624	164	60	8.93997	4.27308	1.3233	15.5933	945.684	280.725	34.803	0.980932	-0.494034	0.057027	1.8725	0.663436	3.78178	0.6408	35.9235	1226.97	1.0277	1.39554	1.8725	0.536787	0.203618	0.520776	0.0528658	3.60377	0.290361	3.53916	0.519856	36.2642	1252.48	0.96649	1.40996	3.60377	0.642094	0.109826	0.388752	6.34e-07	4	221	s
625	123	39	6.24679	2.05271	2.80473	9.69641	790.099	285.542	20.8096	0.913575	-0.564427	0.0219278	4.72447	0.616102	7.15328	0.444747	29.361	811.785	1.22039	1.78603	4.72447	0.707539	0.148398	0.498951	0.0202623	9.82609	0.218287	7.28497	0.307678	29.3478	809.503	1.16646	1.75723	9.82609	0.838061	0.136973	0.477184	1.01e-06	10	141	s
626	183	52	8.21248	3.03342	3.61723	13.124	804.549	294.572	28.2422	0.946209	-0.63044	0.0330321	3.62853	0.473471	4.4457	0.49796	30.0298	846.976	1.10191	1.63167	3.62853	0.658826	0.0961865	0.389871	0.0412649	5.40146	0.192024	4.34259	0.416537	29.9562	845.627	1.01388	1.51498	5.40146	0.737347	0.0812927	0.347097	9.65e-07	9	221	s
627	167	43	6.94413	1.42212	3.96066	8.87056	832.438	302.159	19.285	0.755258	-0.316372	0.0230316	3.16751	0.796521	8.78337	0.485034	31.1371	921.36	1.24737	1.74109	3.16751	0.637676	0.223416	0.595493	0.0191079	9.45865	0.422976	9.19605	0.331891	30.812	899.421	1.21312	1.76509	9.45865	0.838483	0.110248	0.431423	9.18e-07	10	240	s
628	247	76	10.0444	4.01553	3.79555	17.9857	934.158	308.591	32.9902	0.945164	-0.415279	0.062759	1.56272	0.601741	2.96194	0.624637	34.4889	1128.88	0.983642	1.36762	1.56272	0.51508	0.160647	0.460979	0.0569593	2.62644	0.236091	2.71908	0.493647	34.4885	1133.62	0.882401	1.3596	2.62644	0.587469	0.0876225	0.342259	7.1e-07	8	1224	s
629	156	46	6.90108	2.02113	3.84297	10.607	731.957	305.066	20.8549	0.848457	-0.394344	0.0209284	5.50185	0.705765	10.3494	0.46056	28.5609	774.339	1.31308	1.87417	5.50185	0.742865	0.189791	0.570058	0.0223501	13.9412	0.30492	11.0285	0.34536	28.6639	777.932	1.24564	1.80083	13.9412	0.896672	0.20069	0.57518	9.95e-07	11	376	s
630	128	48	6.51974	2.83446	0.989748	10.5406	647.672	308.07	24.556	0.948818	-0.43009	0.0314788	3.01405	0.780603	7.86895	0.520089	32.8735	1029.21	1.1758	1.62229	3.01405	0.62602	0.221409	0.576446	0.0284055	6.23596	0.591819	8.63871	0.415354	32.8652	1028.63	1.17425	1.6348	6.23596	0.740033	0.222388	0.579408	1.03e-06	11	214	s
631	125	42	6.48988	2.40853	3.04483	10.4122	795.147	310.739	22.3698	0.937912	-0.414125	0.0203737	5.56941	0.547429	7.15308	0.41136	28.7224	775.854	1.21214	1.81341	5.56941	0.74505	0.11559	0.446611	0.0212049	10.8506	0.133835	7.26358	0.295404	28.4828	762.091	1.13524	1.75801	10.8506	0.854182	0.110282	0.430707	9.4e-07	10	153	s
632	192	54	7.91505	2.96037	3.82671	13.505	747.108	311.259	27.7104	0.935062	-0.0802329	0.021544	4.10519	0.70086	7.86165	0.484249	29.1363	800.746	1.25432	1.79584	4.10519	0.689386	0.175431	0.540387	0.0186067	9.89209	0.283033	7.89857	0.345185	28.4676	762.327	1.17981	1.84799	9.89209	0.828256	0.122588	0.463056	9.68e-07	11	376	s
633	40	18	3.13999	0.442719	2.54951	3.80789	696.498	312.494	8.30442	0.682388	0.289498	0.132842	0.865079	0.261831	1.58596	0.672222	38.3413	1420.98	0.664957	0.909432	0.865079	0.400028	0.0407151	0.192592	0.12574	1.34615	-0.146818	1.58691	0.557692	38.1923	1413.88	0.604055	0.924021	1.34615	0.422468	0.0299193	0.16636	9.89e-07	8	88	s
634	68	26	4.24581	0.820235	2.90098	5.71371	633.115	314.923	11.5289	0.738586	-0.383497	0.0379062	2.32	0.636785	4.1937	0.527976	33.6622	1071.79	1.08412	1.52982	2.32	0.56291	0.171757	0.499819	0.0362879	6.29268	0.0297193	4.24271	0.330951	33.1707	1043.16	0.976311	1.51719	6.29268	0.704726	0.19149	0.524201	1.02e-06	10	214	s
635	113	33	5.83703	1.51902	3.19334	8.10446	845.873	320.697	17.4795	0.866574	-0.588143	0.0282742	2.97692	0.63289	5.05453	0.485183	32.3821	989.033	1.14439	1.65894	2.97692	0.619956	0.145472	0.478695	0.0241638	6.72619	0.203417	5.2219	0.365295	32.369	989.359	1.07691	1.67556	6.72619	0.747744	0.103756	0.409307	8.99e-07	10	132	s
636	165	47	7.00773	2.01755	2.9879	10.0208	606.43	321.852	21.6265	0.851258	0.0847838	0.0280157	2.48705	0.750404	5.98214	0.56086	31.848	957.297	1.19096	1.64341	2.48705	0.596785	0.224204	0.582791	0.0214808	5.95868	0.42158	6.15083	0.391368	31.3636	928.103	1.14016	1.71803	5.95868	0.731906	0.138359	0.474733	1.01e-06	13	209	s
637	179	59	8.37216	3.44513	2.69726	14.037	747.263	325.433	29.333	0.951322	-0.339705	0.0230527	3.49266	0.687671	6.59132	0.464144	29.9886	846.899	1.21313	1.72662	3.49266	0.65164	0.180851	0.539053	0.0225904	9.47445	0.290376	7.67569	0.336118	30.2044	860.302	1.16864	1.75423	9.47445	0.838526	0.125893	0.458221	9.33e-07	9	547	s
638	520	101	14.6322	5.85157	6.88044	25.17	677.404	335.038	49.677	0.954304	-0.581798	0.0207802	3.06204	0.774974	7.80376	0.521887	30.7718	893.705	1.28365	1.79697	3.06204	0.625458	0.219034	0.597707	0.0151848	6.85102	0.50239	7.88392	0.392767	30.8059	894.12	1.25192	1.8971	6.85102	0.775106	0.102916	0.431313	9.32e-07	11	547	s
639	316	82	10.9899	4.52625	4.4794	18.7152	716.595	331.559	40.5746	0.960874	-0.206106	0.0236086	3.23957	0.71906	6.7656	0.539072	30.2121	858.891	1.24539	1.75559	3.23957	0.636784	0.198571	0.56651	0.0200076	6.5498	0.464831	7.11938	0.433898	29.9761	845.156	1.21451	1.81734	6.5498	0.753464	0.137158	0.484559	9.26e-07	9	547	s
640	74	28	4.54243	1.33496	2.43748	6.38737	771.907	330.579	14.5259	0.861151	-0.533641	0.0181823	7	0.519187	8.27934	0.358878	28.4016	760.123	1.23537	1.83158	7	0.775368	0.112684	0.443224	0.0388	17.04	-0.0891798	8.8224	0.2494	28.48	764.216	1.09448	1.50427	17.04	0.88539	0.128732	0.432383	9.22e-07	14	91	s
641	56	26	3.87391	1.33297	1.72778	5.74327	658.432	329.325	13.0912	0.902812	-0.142358	0.203399	0.966292	0.321815	1.71241	0.698876	36.5843	1289.06	0.707034	0.942484	0.966292	0.435923	0.0709143	0.25874	0.125625	1.625	-0.217513	1.66734	0.5475	37.175	1337.7	0.614741	1.00556	1.625	0.48684	0.0493191	0.222657	9.59e-07	10	98	s
642	90	36	5.20327	2.01061	1.21112	8.29459	799.903	331.161	18.1978	0.923931	-0.378831	0.231898	0.672297	0.364214	1.52871	0.753041	37.9966	1396.3	0.648778	0.847781	0.672297	0.383205	0.0772931	0.256692	0.230394	0.711864	0.0080064	1.3588	0.725424	38.2373	1421.99	0.537532	0.775126	0.711864	0.387681	0.0162917	0.112477	9.19e-07	12	84	s
643	149	44	7.13854	2.70013	2.8124	11.6502	858.637	336.328	24.6486	0.940522	-0.501215	0.0209105	3.95534	0.657847	6.78008	0.476463	31.0078	906.239	1.22398	1.78085	3.95534	0.681393	0.156067	0.510156	0.0227166	6.45631	0.399675	6.37734	0.386119	30.6117	883.647	1.13974	1.71961	6.45631	0.747396	0.126237	0.454772	9.14e-07	8	171	s
644	148	44	6.6198	1.89456	3.6863	9.96119	588.529	335.739	20.5542	0.866515	-0.0276045	0.0184669	3.75048	0.74328	8.30461	0.459856	30.1528	859.68	1.27007	1.82179	3.75048	0.664342	0.186368	0.558844	0.0158264	8.63636	0.435812	8.6538	0.302464	29.9455	845.339	1.25119	1.85376	8.63636	0.804054	0.122873	0.4642	9.74e-07	9	1674	s
645	100	38	5.43976	1.45158	2.20927	7.99584	881.361	338.661	14.8304	0.773959	-0.530383	0.0481382	1.50751	0.691642	3.44441	0.608824	34.8769	1154.91	1.01481	1.38043	1.50751	0.505305	0.188597	0.499827	0.0466696	2.77612	0.375464	3.22254	0.487445	34.7761	1148.72	0.973622	1.3947	2.77612	0.601171	0.0799118	0.331069	9.07e-07	8	14595	s
646	119	47	6.36245	2.88672	1.72432	10.8007	537.267	342.745	24.8635	0.958302	-0.185835	0.0421519	2.52284	0.434836	3.23196	0.492117	35.1777	1175.15	0.99069	1.44491	2.52284	0.581034	0.0889687	0.354795	0.0351111	6.37333	-0.151918	3.7664	0.363198	35.12	1175.59	0.901615	1.47875	6.37333	0.731991	0.0892023	0.359108	9.54e-07	7	1674	s
647	79	30	4.6955	1.5004	1.73237	7.06171	768.734	344.654	15.1385	0.878979	-0.483581	0.103698	1.11494	0.478761	2.06951	0.680527	36.6475	1285.6	0.836399	1.14923	1.11494	0.460653	0.118348	0.366878	0.0694444	1.8	0.256028	2.20972	0.56	36.8333	1299.09	0.832563	1.228	1.8	0.507856	0.0724734	0.296999	9.09e-07	12	104	s
648	489	108	15.0645	6.92402	4.37037	26.769	594.576	350.08	58.1342	0.976738	-0.253241	0.0291312	4.3743	0.733667	9.21209	0.534917	26.8207	681.101	1.27419	1.77236	4.3743	0.693337	0.215307	0.589875	0.0221676	8.94885	0.445986	9.07637	0.426844	26.3299	652.9	1.23922	1.83041	8.94885	0.805462	0.134456	0.481571	9.41e-07	9	1674	s
649	121	35	5.82392	1.10526	3.83635	7.51211	823.516	346.341	15.7232	0.731356	0.129512	0.0485356	2.46556	0.505363	3.49229	0.543212	31.8385	957.436	1.01751	1.45577	2.46556	0.591485	0.107015	0.389569	0.0524567	3.85882	0.192071	3.3881	0.449047	31.6235	947.931	0.927636	1.36237	3.85882	0.642549	0.049083	0.2574	9.3e-07	11	132	s
650	108	37	5.54258	1.68785	2.15573	7.99315	478.488	347.851	17.9207	0.889107	0.0227665	0.0519	2.14674	0.697599	4.5495	0.57035	34.0924	1102.73	1.06698	1.4826	2.14674	0.574441	0.198702	0.528189	0.0426562	4.8875	0.359272	4.81402	0.418205	34.2625	1114.47	1.03455	1.50243	4.8875	0.696968	0.14944	0.464174	9.44e-07	9	145	s
651	121	35	5.8336	1.12345	3.82003	7.71963	641.451	353.13	16.0374	0.760753	-0.305812	0.0489447	3.46793	0.493239	4.42167	0.499443	28.9169	786.766	1.05026	1.51845	3.46793	0.648196	0.111526	0.405196	0.0345285	6.29213	0.0698022	4.38215	0.384152	28.764	777.722	1.00642	1.5429	6.29213	0.753921	0.0286572	0.209444	9.13e-07	12	140	s
652	43	20	3.27349	0.729209	1.84459	4.28981	735.997	350.587	9.6239	0.796003	-0.247183	0.0508642	2.03704	0.400576	2.69916	0.505926	35.1037	1172.86	0.926264	1.35849	2.03704	0.515986	0.0854453	0.337926	0.0643491	4.61538	-0.173815	2.96598	0.337557	35.4615	1203.97	0.810148	1.23286	4.61538	0.589639	0.156532	0.434631	8.93e-07	12	55	s
653	197	50	7.74393	2.18319	3.35935	11.9048	520.344	356.317	23.1684	0.860795	-0.4373	0.0773474	0.97711	0.689144	2.57164	0.676252	34.8455	1154.28	0.949024	1.24218	0.97711	0.436215	0.195542	0.485824	0.0824558	1.54194	0.435586	2.36596	0.58425	34.5742	1140.06	0.867524	1.22222	1.54194	0.499062	0.0903509	0.330478	9.26e-07	6	1674	s
654	241	73	9.80874	4.03186	3.09638	16.9806	542.85	357.593	34.2666	0.95217	0.00716031	0.0309388	2.59264	0.764917	6.5143	0.577899	31.3741	930.596	1.18915	1.63239	2.59264	0.602857	0.236367	0.595305	0.0327964	4.59064	0.60299	6.78151	0.454829	30.7778	896.098	1.15409	1.63062	4.59064	0.696648	0.171036	0.512697	9.27e-07	7	1674	s
655	476	94	12.6311	4.03776	3.48737	21.6208	781.232	361.139	37.9905	0.8286	0.122924	0.0325091	1.81656	0.807847	5.72687	0.58634	30.5745	880.148	1.19664	1.60932	1.81656	0.539487	0.256942	0.614635	0.0246975	4.53944	0.525441	5.7828	0.444526	30.2545	861.26	1.15689	1.72543	4.53944	0.700813	0.111775	0.42984	9.14e-07	13	1011	s
656	559	115	14.4341	6.55232	1.78721	25.6444	706.402	363.643	49.0232	0.937102	0.10882	0.0250028	2.77995	0.739714	6.34019	0.532602	32.3183	986.123	1.213	1.71567	2.77995	0.620007	0.185457	0.543882	0.0209517	6.85306	0.373063	6.46551	0.425389	32.4857	995.345	1.17539	1.77848	6.85306	0.775963	0.0560711	0.312266	8.74e-07	9	610	s
657	127	52	6.42315	2.22492	2.54661	10.4598	752.78	358.707	19.0966	0.853271	-0.152988	0.0756027	1.22356	0.478986	2.17421	0.630189	35.8293	1225.44	0.872646	1.21116	1.22356	0.466482	0.098802	0.343922	0.0628077	2.21348	0.0880816	2.21364	0.484931	35.7416	1222.7	0.812232	1.26984	2.21348	0.52925	0.0304818	0.196325	8.94e-07	12	1011	s
658	40	22	3.16545	0.860389	1.74867	4.6185	449.146	357.088	9.63175	0.791452	-0.149211	0.0324653	5.83333	0.398203	5.8466	0.367994	30.3833	871.331	1.09549	1.58785	5.83333	0.711215	0.112652	0.415537	0.0536	19.16	-0.263119	8.5844	0.253479	30.68	894.03	0.967173	1.33334	19.16	0.859349	0.157645	0.451686	9.41e-07	13	236	s
659	152	40	6.76548	1.43947	4.35388	9.17912	373.351	362.846	19.1653	0.826339	-0.677181	0.0292183	2.55514	0.665972	4.82474	0.530018	31.3514	925.953	1.13205	1.61257	2.55514	0.598541	0.172625	0.512475	0.0254943	5.50806	0.346207	5.21239	0.399303	31.4274	931.789	1.08855	1.68398	5.50806	0.71478	0.0932709	0.389735	9.65e-07	11	462	s
660	68	30	4.50866	1.63734	1.85951	7.04683	438.135	359.25	15.9248	0.924762	-0.358027	0.0250715	5.50459	0.554406	7.17669	0.405296	29.6055	826.942	1.18474	1.74309	5.50459	0.724413	0.14169	0.48313	0.0416419	9.58537	0.219653	7.14173	0.354703	29.4878	822.549	1.07008	1.56124	9.58537	0.819315	0.314044	0.664088	9.43e-07	12	236	s
661	94	42	5.67786	2.39531	1.67633	9.62638	674.241	365.319	20.6595	0.952099	-0.162886	0.0899796	1	0.441371	1.89505	0.635099	36.8742	1304.43	0.792997	1.0911	1	0.409869	0.0959906	0.322769	0.143796	1.62687	-0.0358131	1.78531	0.598507	37.0896	1327.46	0.67596	0.974071	1.62687	0.521724	0.0317601	0.175917	8.78e-07	9	181	s
662	77	34	4.83016	2.01357	1.79797	8.50244	657.563	365.247	17.9232	0.948279	0.0867912	0.052104	2.54618	0.301577	2.82281	0.550546	34.5542	1134.48	0.942697	1.40865	2.54618	0.60206	0.0522408	0.269775	0.043698	5.37931	-0.19556	3.2497	0.351225	34.9655	1166.29	0.867547	1.43169	5.37931	0.686376	0.0535626	0.275265	8.86e-07	11	181	s
663	355	82	11.6233	4.62208	5.33723	19.8088	454.454	370.272	41.0906	0.954385	-0.106601	0.0221463	3.08736	0.787441	8.26237	0.510819	28.6084	773.573	1.26594	1.77011	3.08736	0.633906	0.223374	0.599372	0.0165778	7.75524	0.447938	8.02389	0.366356	28.2937	753.154	1.22317	1.87423	7.75524	0.797786	0.0983997	0.419898	9.19e-07	10	841	s
664	46	20	3.44927	0.728022	2.15	4.5412	153.867	368.899	10.1092	0.800684	-1.08796	0.041049	2.50685	0.473464	3.38051	0.516277	33.3288	1051.79	1.00578	1.45599	2.50685	0.581039	0.0919664	0.361872	0.092	5.96	-0.124528	3.65	0.338118	33.4	1065.69	0.826176	1.07904	5.96	0.618525	0.084181	0.30078	9.79e-07	15	60	s
665	41	18	3.24639	0.564771	2.11549	4.05898	177.628	368.016	9.03986	0.756599	0.611938	0.0360255	2.5814	0.556314	3.90903	0.490656	33.2481	1045.48	1.05452	1.52839	2.5814	0.569791	0.134843	0.445283	0.0485537	5.5	-0.115909	3.46436	0.303476	33.2273	1050.11	0.889244	1.37314	5.5	0.631251	0.121739	0.403803	9.66e-07	14	56	s
666	124	40	6.14868	2.08505	2.16708	9.40459	295.834	369.723	20.3377	0.90383	-0.454003	0.0166782	5.16235	0.630247	7.98081	0.413073	28.6071	770.455	1.26306	1.85909	5.16235	0.717965	0.149783	0.509827	0.0176321	13	0.141954	8.57536	0.228683	28.5484	765.98	1.18639	1.81373	13	0.862881	0.158345	0.517625	9.38e-07	10	196	s
667	215	67	9.29125	3.90454	2.75797	15.4522	351.596	371.716	33.8814	0.954629	-0.349236	0.0280621	3.95418	0.5458	5.35291	0.466707	29.7143	829.466	1.14842	1.7032	3.95418	0.680455	0.111407	0.426662	0.031139	7.12583	0.131135	5.10065	0.365756	29.8543	838.6	1.05633	1.64567	7.12583	0.781722	0.051558	0.288804	9.56e-07	12	462	s
668	152	55	6.7598	1.80532	2.99553	10.2439	774.766	371.761	16.5012	0.33795	-0.834526	0.0205264	3.53635	0.750576	8.08901	0.474647	30.5069	880.345	1.2575	1.74988	3.53635	0.65357	0.211754	0.582476	0.0216312	7.33028	0.436131	7.49998	0.334749	30.0092	848.873	1.19593	1.74071	7.33028	0.781618	0.153714	0.50162	9.12e-07	12	1011	s
669	154	52	7.7213	3.25601	2.95335	13.0675	623.535	372.857	28.1837	0.963526	-0.392757	0.0225316	4.64176	0.513223	5.76786	0.448931	32.4349	991.99	1.1689	1.76351	4.64176	0.705378	0.0896691	0.390611	0.0212524	10.4771	0.0209838	6.35081	0.324532	32.8073	1016.28	1.09999	1.74065	10.4771	0.842306	0.0682459	0.340186	8.97e-07	11	189	s
670	163	61	8.26424	4.01216	0.98265	14.568	261.443	374.603	33.508	0.973441	-0.255057	0.0249291	3.72943	0.595715	5.61238	0.490802	31.5722	938.69	1.17535	1.70661	3.72943	0.668333	0.133084	0.464729	0.0224372	7.0885	0.164119	5.24013	0.329958	31.6549	945.283	1.07038	1.68936	7.0885	0.755407	0.0846582	0.372456	9.16e-07	8	201	s
671	340	93	12.2419	5.48072	3.97995	22.1	668.051	377.935	43.5839	0.969083	-0.0655934	0.0232751	3.1834	0.684432	6.04392	0.503982	32.3602	988.543	1.19045	1.69737	3.1834	0.641209	0.160948	0.506979	0.0218144	7.99248	0.247159	6.30821	0.376157	32.3008	983.837	1.14635	1.74131	7.99248	0.787062	0.0591512	0.317334	8.71e-07	11	644	s
672	107	40	5.80607	1.94508	2.33586	9.61282	783.887	380.021	17.0727	0.832495	-1.0648	0.0400833	2.43099	0.547015	3.68329	0.538493	35.3549	1185.55	1.04392	1.49703	2.43099	0.589929	0.108836	0.397844	0.0391274	5.06579	0.222377	4.25723	0.365915	35.2763	1183.2	0.994619	1.48945	5.06579	0.695055	0.0967995	0.374955	9.29e-07	11	1011	s
673	265	74	8.37611	2.83686	0.095555	12.4535	527.895	380.982	22.5092	0.52205	0.199728	0.045202	2.14914	0.736014	5.07056	0.587736	34.1084	1102.14	1.12342	1.54145	2.14914	0.55218	0.218488	0.561099	0.0460617	4.21287	0.448327	4.81827	0.471693	33.9356	1091.76	1.06164	1.58421	4.21287	0.677055	0.114752	0.418807	8.97e-07	8	336	s
674	230	65	9.24238	3.83961	3.17035	15.9192	557.2	380.16	33.8159	0.959594	-0.187828	0.0287022	2.93951	0.635294	5.02997	0.527981	31.8556	955.594	1.1568	1.6533	2.93951	0.619469	0.149583	0.484308	0.024481	5.81176	0.284003	5.05851	0.396567	31.5647	939.085	1.09073	1.68372	5.81176	0.739279	0.107787	0.417787	9.03e-07	11	267	s
675	143	39	6.32516	1.47481	3.73779	8.785	140.309	380.458	18.3967	0.815104	-0.184107	0.0436486	2.57455	0.616869	4.35989	0.552042	30.0616	850.521	1.0848	1.53194	2.57455	0.607879	0.149369	0.468068	0.10991	3.56863	0.307959	3.57834	0.570278	30.0196	853.474	0.920986	1.23914	3.56863	0.657968	0.135286	0.405664	9.56e-07	15	177	s
676	101	33	5.29441	1.04556	3.53729	7.08158	394.429	380.206	14.7169	0.740897	0.350944	0.0235051	4.17733	0.792429	11.0624	0.459998	30.7703	904.867	1.29502	1.80586	4.17733	0.679431	0.236695	0.61983	0.0185479	12.4225	0.429194	11.8816	0.313281	30.2817	871.818	1.28662	1.79555	12.4225	0.887934	0.17771	0.543559	9.39e-07	13	119	s
677	61	25	3.98139	0.684508	2.97321	5.1614	594.942	379.882	10.5477	0.6283	-0.886066	0.0263749	3.9697	0.534182	5.26099	0.434288	32.0808	971.962	1.1149	1.64508	3.9697	0.670105	0.125701	0.444981	0.0288532	7.08108	0.186199	5.35062	0.269488	31.9459	963.195	1.07729	1.59046	7.08108	0.705399	0.1265	0.439635	9.03e-07	9	187	s
678	96	34	5.41553	1.88486	2.24957	8.35263	426.755	381.599	18.2906	0.925165	-0.437475	0.0595511	1.3882	0.596078	2.7184	0.611052	34.0466	1099.38	0.972498	1.34846	1.3882	0.484571	0.149046	0.441819	0.0489836	3.20588	0.268167	3.19031	0.475526	34.0588	1101.99	0.946344	1.37795	3.20588	0.622266	0.134731	0.424855	9.21e-07	10	841	s
679	216	49	8.57882	2.66243	3.94723	12.7355	725.444	388.467	27.1703	0.907407	-0.79742	0.018107	3.93653	0.804878	11.0874	0.49731	30.3303	877.929	1.32142	1.85247	3.93653	0.67026	0.22503	0.612223	0.0193157	8.79775	0.594745	11.8546	0.390837	30.3933	882.169	1.28058	1.81504	8.79775	0.802988	0.162336	0.523776	8.71e-07	6	242	s
680	293	80	11.3531	5.20867	2.91347	19.9903	629.377	386.579	43.0507	0.976131	-0.342374	0.0406704	3.0087	0.550014	4.3431	0.525807	30.5484	878.798	1.07916	1.56815	3.0087	0.630018	0.106855	0.40279	0.0445133	5.625	0.163743	4.3632	0.441234	30.3929	871.288	1.00816	1.5453	5.625	0.743374	0.0648312	0.313624	8.86e-07	11	644	s
681	75	27	4.46124	0.72858	3.30149	5.6709	380.633	384.026	12.3291	0.705022	-1.28843	0.0251874	8.03571	0.552354	9.97553	0.41713	24.1627	553.148	1.24369	1.80187	8.03571	0.81035	0.179241	0.546499	0.0393861	13.5192	0.257648	10.1057	0.376285	24.0192	547.766	1.10935	1.54448	13.5192	0.852652	0.210477	0.551933	9.41e-07	11	94	s
682	40	18	3.20688	0.630871	1.8667	4.08739	441.504	382.847	8.93195	0.757425	-0.617824	0.048768	2.92	0.392966	3.40514	0.48219	33.384	1055.53	0.998391	1.44313	2.92	0.614134	0.0892172	0.355074	0.0900277	3	-0.0675209	2.40512	0.447368	33.1053	1047.17	0.785707	1.11842	3	0.585205	0.0826344	0.303154	9.11e-07	11	841	s
683	105	35	5.7399	2.02528	2.64745	8.83874	485.338	385.242	19.0303	0.918246	-0.540115	0.0294307	5.01408	0.519677	6.21949	0.402659	29.1437	799.844	1.14401	1.66904	5.01408	0.708731	0.113583	0.426707	0.0366928	11	-0.00829092	6.45477	0.294161	29.3038	808.332	1.06352	1.517	11	0.842837	0.0686502	0.319739	8.93e-07	7	152	s
684	105	35	5.7399	2.02528	2.64745	8.83874	485.338	385.242	19.0303	0.918246	-0.540115	0.0294307	5.01408	0.519677	6.21949	0.402659	29.1437	799.844	1.14401	1.66904	5.01408	0.708731	0.113583	0.426707	0.0366928	11	-0.00829092	6.45477	0.294161	29.3038	808.332	1.06352	1.517	11	0.842837	0.0686502	0.319739	8.93e-07	7	152	s
685	133	39	6.195	1.8331	2.17329	8.82625	200.089	387.134	19.3636	0.862488	-0.234628	0.0422687	2.35714	0.662635	4.49346	0.542731	31.1147	913.241	1.08766	1.52355	2.35714	0.584352	0.161364	0.484407	0.0381612	4.20408	0.296561	3.98823	0.446856	30.8367	896.509	1.02466	1.52833	4.20408	0.678642	0.0929206	0.371985	9.11e-07	12	178	s
686	136	36	6.15267	0.752848	4.89275	7.40084	118.288	388.946	15.8717	0.640754	0.523021	0.0227488	4.62004	0.679248	8.20189	0.471873	26.0814	640.488	1.25602	1.7882	4.62004	0.705847	0.198674	0.570921	0.0269	9.44	0.35445	8.3116	0.330605	25.44	609.735	1.15155	1.70962	9.44	0.823144	0.168618	0.519688	9.25e-07	15	151	s
687	187	50	8.04122	2.89115	3.33766	12.6625	152.643	390.339	27.8352	0.939703	-0.489875	0.030146	3.52207	0.631959	5.78489	0.540857	28.4079	757.104	1.17766	1.6741	3.52207	0.641737	0.188078	0.541829	0.0240889	6.88	0.376058	6.51333	0.43828	28.8	778.738	1.16732	1.73476	6.88	0.760114	0.125227	0.454814	9.35e-07	15	375	s
688	146	54	6.19529	2.17206	1.28113	10.056	96.2545	388.944	20.0129	0.821838	0.149706	0.0159756	6.79713	0.673989	11.4247	0.446744	26.4365	665.804	1.3187	1.92174	6.79713	0.774953	0.193047	0.580312	0.0198001	14.451	0.34912	12.1011	0.355795	26.549	669.161	1.26646	1.7732	14.451	0.852451	0.243943	0.623694	8.86e-07	15	441	s
689	146	54	6.19529	2.17206	1.28113	10.056	96.2545	388.944	20.0129	0.821838	0.149706	0.0159756	6.79713	0.673989	11.4247	0.446744	26.4365	665.804	1.3187	1.92174	6.79713	0.774953	0.193047	0.580312	0.0198001	14.451	0.34912	12.1011	0.355795	26.549	669.161	1.26646	1.7732	14.451	0.852451	0.243943	0.623694	8.86e-07	15	441	s
690	117	43	5.90017	2.14238	1.8722	9.64331	590.695	390.108	19.8776	0.895027	-0.0624769	0.0531697	2.26972	0.375241	2.81648	0.546703	35.369	1189.51	0.952226	1.412	2.26972	0.572481	0.0639638	0.298463	0.06946	3.70886	-0.0495364	2.7669	0.452311	35.7848	1223.9	0.848514	1.25758	3.70886	0.660168	0.0631969	0.280697	8.99e-07	10	187	s
691	60	25	3.96543	0.973337	2.32551	5.4266	366.364	388.801	11.8545	0.824298	0.294519	0.0361867	2.55897	0.494347	3.53037	0.518508	32.2513	982.269	1.03099	1.51504	2.55897	0.584041	0.105768	0.394527	0.0467495	3.37838	0.260296	3.2836	0.44213	32.027	971.688	0.947586	1.40036	3.37838	0.619502	0.11717	0.399935	9.41e-07	10	74	s
692	153	44	7.03113	2.34634	2.54302	10.7582	355.747	398.519	22.8998	0.904907	0.907254	0.0252311	4.20301	0.623775	6.58577	0.457158	28.8985	786.035	1.18759	1.74412	4.20301	0.6916	0.13573	0.473583	0.0319728	7.62857	0.100909	5.24238	0.350097	28.2	745.766	1.06285	1.62864	7.62857	0.788183	0.0400085	0.253628	9.39e-07	13	186	s
693	121	33	5.96352	1.18501	3.69709	7.822	423.793	396.262	16.5729	0.809511	-0.852317	0.0334252	2.609	0.687948	5.1804	0.531406	32.0592	969.415	1.15128	1.62894	2.609	0.601983	0.182381	0.528054	0.0305517	5.65169	0.329981	5.21755	0.367226	32.0787	971.328	1.09301	1.63735	5.65169	0.71344	0.16374	0.503226	9.11e-07	12	841	s
694	227	59	8.51976	3.08358	2.37003	13.878	796.646	396.463	29.217	0.90129	-0.0451369	0.0241558	3.81017	0.737457	8.25628	0.483494	29.098	800.577	1.25269	1.77163	3.81017	0.676244	0.193405	0.56185	0.0183492	9.71892	0.369568	8.70814	0.363042	28.7351	778.096	1.22181	1.87274	9.71892	0.853151	0.0869459	0.395635	9.7e-07	11	790	s
695	231	65	9.02615	3.63433	2.8738	15.2461	83.5855	397.722	32.372	0.946821	-0.0498539	0.019031	3.96798	0.74301	8.7201	0.472456	28.202	751.687	1.28033	1.8252	3.96798	0.67726	0.189643	0.563715	0.0181937	9.24405	0.418864	8.95344	0.354003	27.4583	710.226	1.23513	1.83575	9.24405	0.825064	0.107686	0.434225	8.35e-07	12	441	s
696	231	65	9.02615	3.63433	2.8738	15.2461	83.5855	397.722	32.372	0.946821	-0.0498539	0.019031	3.96798	0.74301	8.7201	0.472456	28.202	751.687	1.28033	1.8252	3.96798	0.67726	0.189643	0.563715	0.0181937	9.24405	0.418864	8.95344	0.354003	27.4583	710.226	1.23513	1.83575	9.24405	0.825064	0.107686	0.434225	8.35e-07	12	441	s
697	115	39	6.51742	2.67784	2.48453	10.6563	248.644	401.931	23.285	0.954637	-0.938091	0.0173897	7.0285	0.547513	8.76652	0.415211	26.9197	681.726	1.27424	1.89863	7.0285	0.778223	0.122097	0.467732	0.0195481	14.6456	0.138557	9.5006	0.292486	27.1013	689.359	1.21687	1.77665	14.6456	0.885558	0.168653	0.528283	8.87e-07	10	140	s
698	191	50	7.26548	0.817331	5.02641	8.94789	310.724	401.47	17.017	0.426786	1.33137	0.0204136	4.42268	0.642637	7.18794	0.47717	26.6642	667.093	1.23266	1.81234	4.42268	0.694089	0.153677	0.510331	0.0238313	8.37162	0.226942	6.41462	0.337264	26.4392	653.637	1.13404	1.74884	8.37162	0.801399	0.119768	0.446904	9.27e-07	13	702	s
699	150	42	6.50421	1.08572	4.40425	8.72693	325.509	400.57	17.2156	0.682296	0.287609	0.0174631	4.22581	0.749301	9.42805	0.430738	27.2163	701.67	1.28982	1.84658	4.22581	0.686085	0.204857	0.586436	0.0145823	11.4622	0.390765	10.407	0.305709	27.2101	699.681	1.25792	1.89912	11.4622	0.850998	0.163301	0.535343	9.34e-07	12	702	s
700	222	51	8.15721	2.15073	3.96689	11.5975	381.272	401.544	23.2007	0.811701	-0.233956	0.0568096	2.49686	0.615761	4.24911	0.587761	30.8833	901.021	1.04171	1.47959	2.49686	0.59624	0.138332	0.444283	0.0492996	5.23077	0.263058	4.54897	0.459427	31.1868	919.168	1.01725	1.50702	5.23077	0.727622	0.0787673	0.340941	9.31e-07	12	253	s
701	71	28	4.47097	1.35676	2.01556	6.60019	486.892	398.173	14.261	0.884648	-0.358255	0.0441065	2.79399	0.420293	3.40983	0.497627	31.9871	967.93	0.985759	1.43389	2.79399	0.604534	0.0737178	0.322399	0.0386	5.34	-0.0161751	3.6275	0.389005	32.3	988.577	0.940685	1.45818	5.34	0.714376	0.0607606	0.295509	8.86e-07	6	145	s
702	71	28	4.47097	1.35676	2.01556	6.60019	486.892	398.173	14.261	0.884648	-0.358255	0.0441065	2.79399	0.420293	3.40983	0.497627	31.9871	967.93	0.985759	1.43389	2.79399	0.604534	0.0737178	0.322399	0.0386	5.34	-0.0161751	3.6275	0.389005	32.3	988.577	0.940685	1.45818	5.34	0.714376	0.0607606	0.295509	8.86e-07	6	145	s
703	236	62	8.84905	2.61047	4.77991	13.6101	567.439	400.889	26.8985	0.88049	-0.0154847	0.0177696	5.11084	0.741829	10.8982	0.430621	30.1904	869.387	1.29564	1.87283	5.11084	0.724039	0.174117	0.548051	0.0228706	9.26786	0.469053	9.72767	0.371486	29.8274	843.948	1.22134	1.78908	9.26786	0.829537	0.173595	0.536933	9e-07	10	0	s
704	220	57	8.12585	1.86299	3.63581	11.966	773.085	405.759	21.6266	0.694589	0.816629	0.0485218	1.24775	0.74292	3.42678	0.629933	34.439	1122.78	1.05761	1.40411	1.24775	0.468988	0.229853	0.552772	0.0352047	3.07955	0.471711	3.91464	0.482338	34.5227	1128.99	1.05012	1.52542	3.07955	0.630579	0.0973422	0.380149	9.37e-07	9	790	s
705	131	39	6.06988	1.14359	3.63072	8.10049	296.32	400.804	15.9096	0.649675	-0.111717	0.0244979	3.53509	0.717039	7.2466	0.509989	28.2895	753.362	1.23563	1.73619	3.53509	0.661991	0.204146	0.571083	0.0278124	9.19811	0.321305	7.77632	0.407277	28.4434	760.818	1.18701	1.66067	9.19811	0.809323	0.147112	0.481453	9.18e-07	13	702	s
706	194	53	7.68305	2.39116	3.23721	11.5018	171.438	405.659	24.3843	0.874478	0.53477	0.0208301	3.97657	0.816339	11.8259	0.488988	28.4187	774.006	1.31377	1.8482	3.97657	0.672579	0.235984	0.624595	0.0167952	9.10791	0.560241	11.3556	0.363532	27.3094	709.937	1.27817	1.87163	9.10791	0.828668	0.173366	0.546825	8.99e-07	14	652	s
707	586	134	17.5004	8.3343	4.00997	32.7627	512.25	411.464	65.9638	0.977186	-0.315242	0.0246165	2.60728	0.85858	10.2182	0.561286	30.9513	914.035	1.29042	1.73814	2.60728	0.607801	0.279168	0.656538	0.0159607	7.41667	0.614225	10.6127	0.407895	30.8557	905.211	1.28921	1.89152	7.41667	0.795787	0.130996	0.482604	8.88e-07	4	600	s
708	586	134	17.5004	8.3343	4.00997	32.7627	512.25	411.464	65.9638	0.977186	-0.315242	0.0246165	2.60728	0.85858	10.2182	0.561286	30.9513	914.035	1.29042	1.73814	2.60728	0.607801	0.279168	0.656538	0.0159607	7.41667	0.614225	10.6127	0.407895	30.8557	905.211	1.28921	1.89152	7.41667	0.795787	0.130996	0.482604	8.88e-07	4	600	s
709	216	49	8.37127	2.34156	4.54571	12.1794	109.428	409.909	26.6728	0.891823	-0.540617	0.0304085	4.79457	0.737066	10.1174	0.499537	24.3708	565.68	1.26225	1.77478	4.79457	0.716361	0.219413	0.595217	0.0244583	11.0115	0.425657	10.5862	0.393201	23.9885	545.622	1.22255	1.81711	11.0115	0.857737	0.158121	0.517697	8.71e-07	12	1625	s
710	319	62	10.0792	2.7846	4.42988	14.436	266.297	415.023	29.7397	0.856695	-0.926959	0.0260344	3.50558	0.72441	7.36013	0.497495	26.7399	672.501	1.23371	1.76725	3.50558	0.657907	0.173649	0.534247	0.0231857	6.90234	0.416774	6.91739	0.394316	26.2695	646.738	1.17031	1.80221	6.90234	0.777524	0.0797983	0.372976	8.96e-07	11	350	s
711	255	64	9.19848	3.43367	2.64358	14.9777	795.461	411.476	31.6996	0.927732	0.28964	0.0244057	2.69747	0.737696	6.14188	0.526439	30.011	847.06	1.21535	1.72189	2.69747	0.608494	0.192522	0.554129	0.0247424	5.26768	0.420623	5.54598	0.422792	29.702	828.55	1.14271	1.7165	5.26768	0.723978	0.122062	0.447209	9.89e-07	11	790	s
712	209	51	8.24268	2.59532	4.11942	12.7437	406.189	412.563	26.316	0.904785	-0.462965	0.0393793	3.45638	0.725304	7.29128	0.522993	27.6228	721.769	1.16417	1.64688	3.45638	0.657073	0.191392	0.542488	0.0437654	8.27711	0.309083	6.98995	0.422359	27.3855	706.501	1.10211	1.58167	8.27711	0.80279	0.117196	0.422765	9.15e-07	9	250	s
713	281	72	10.2413	4.1678	3.58358	17.2991	547.315	411.575	37.3547	0.956044	-0.173027	0.0387619	4.99301	0.647378	8.07982	0.503317	26.5255	664.137	1.21124	1.72369	4.99301	0.723644	0.173945	0.529071	0.0346542	10.4057	0.169071	7.26146	0.399798	25.8962	628.664	1.11673	1.70823	10.4057	0.850003	0.0750053	0.353042	8.99e-07	11	528	s
714	65	27	4.08811	1.17733	1.26686	5.67102	820.716	410.45	12.5933	0.818836	1.03964	0.0351969	2.74882	0.618428	4.60196	0.498745	34.2749	1114.02	1.07299	1.52989	2.74882	0.606402	0.162288	0.4866	0.0437212	5.25641	0.28987	4.70102	0.395185	34.1282	1106.9	1.00183	1.38946	5.25641	0.707871	0.122014	0.406433	1.05e-06	16	14595	s
715	141	38	6.27973	0.844085	4.12755	8.01544	160.303	413.644	15.8725	0.634183	-0.698751	0.0394796	1.91919	0.709376	4.30185	0.571741	31.9313	962.395	1.09129	1.50442	1.91919	0.549749	0.19311	0.524394	0.031746	3.9619	0.419828	4.41442	0.412299	31.5429	939.123	1.05635	1.58107	3.9619	0.656187	0.106152	0.403016	8.91e-07	13	652	s
716	44	19	3.33341	0.448784	2.51367	4.07207	54.0956	413.637	8.75941	0.669783	-0.91531	0.0740816	1.72143	0.37211	2.3708	0.566849	34.55	1137.61	0.877297	1.2699	1.72143	0.518359	0.0841958	0.324985	0.0850178	2.51724	-0.0977444	2.14655	0.481339	35	1174.52	0.758876	1.1544	2.51724	0.558699	0.0608501	0.264363	6.93e-07	10	68	s
717	194	53	7.52195	2.35278	2.98388	11.4058	134.818	416.707	23.6309	0.863633	0.209654	0.0459935	1.85022	0.715757	4.25464	0.599163	32.7254	1012.23	1.08584	1.48189	1.85022	0.551697	0.201513	0.531573	0.03125	4.05405	0.445187	4.65353	0.458151	32.473	995.987	1.08146	1.61812	4.05405	0.680983	0.0975458	0.391022	8.83e-07	12	1625	s
718	196	48	7.45239	1.23608	4.14033	9.30371	28.1176	425.555	18.835	0.656262	-1.5186	0.0781694	1.12857	0.621225	2.48976	0.675311	34.8457	1155.48	0.924455	1.23352	1.12857	0.466116	0.17585	0.460064	0.0565743	2.24841	0.291658	2.58709	0.529282	35.1656	1178.58	0.894845	1.33974	2.24841	0.568545	0.0619625	0.286533	5.49e-07	6	482	s
719	117	37	6.30411	2.1658	2.96374	9.49822	699.317	423.468	20.7335	0.932292	-0.716318	0.0429607	2.69521	0.540088	3.93014	0.543545	35.5214	1197.97	1.04039	1.49182	2.69521	0.611731	0.113387	0.405169	0.0375236	5.3253	0.253014	4.56452	0.423517	35.3735	1187.42	1.04445	1.50435	5.3253	0.720631	0.0690171	0.319307	8.86e-07	8	268	s
720	56	24	3.83855	1.10549	1.95833	5.40078	213.856	420.937	12.1368	0.861857	-0.32113	0.0322994	3.22222	0.45591	3.96111	0.45827	32	966.151	1.05604	1.57199	3.22222	0.62544	0.0979818	0.386686	0.0357925	8.13514	-0.0103878	5.02575	0.278494	31.7568	953.536	1.00666	1.5335	8.13514	0.743006	0.170757	0.498961	8.7e-07	10	85	s
721	103	34	5.48209	1.41523	3.24983	7.99097	324.758	422.019	17.0137	0.860612	-0.406176	0.0178571	6.04571	0.630255	9.17551	0.418197	27.0286	689.745	1.27807	1.8695	6.04571	0.760517	0.159437	0.525992	0.0189352	12.6866	0.210037	9.02985	0.284115	26	634.411	1.20125	1.78686	12.6866	0.840383	0.140829	0.486988	9.4e-07	11	200	s
722	212	53	7.99018	2.29824	3.02935	11.7436	69.9536	428.307	24.3933	0.866857	0.916802	0.052574	1.39868	0.694688	3.29057	0.619758	32.7894	1015.21	1.04911	1.41601	1.39868	0.494621	0.197455	0.516447	0.0457128	3.28736	0.355898	3.55189	0.468882	32.8161	1017.99	1.01876	1.51727	3.28736	0.632694	0.0740789	0.331914	7.34e-07	11	1625	s
723	90	32	5.2071	1.78736	1.52197	7.87029	90.5778	423.369	17.1486	0.904812	-0.543467	0.0420801	2.82392	0.475078	3.68985	0.507779	30.9103	900.097	1.04123	1.53819	2.82392	0.613278	0.110862	0.406417	0.0449954	5.51515	0.154561	4.26171	0.409187	31.2727	922.68	1.02131	1.50225	5.51515	0.725053	0.134316	0.441032	8.07e-07	13	1625	s
724	90	32	5.2071	1.78736	1.52197	7.87029	90.5778	423.369	17.1486	0.904812	-0.543467	0.0420801	2.82392	0.475078	3.68985	0.507779	30.9103	900.097	1.04123	1.53819	2.82392	0.613278	0.110862	0.406417	0.0449954	5.51515	0.154561	4.26171	0.409187	31.2727	922.68	1.02131	1.50225	5.51515	0.725053	0.134316	0.441032	8.07e-07	13	1625	s
725	148	46	6.89684	2.32339	3.29898	10.7406	292.797	423.288	23.2136	0.914768	-0.120148	0.0211015	4.68627	0.706843	8.99278	0.494596	27.8549	734.06	1.26966	1.81446	4.68627	0.696353	0.202275	0.578993	0.0215242	12.6964	0.251403	9.48015	0.408763	27.9107	734.355	1.2062	1.78842	12.6964	0.855525	0.170996	0.533137	9.22e-07	11	302	s
726	61	28	3.95047	0.81419	1.82702	5.75532	313.842	423.669	10.2284	0.543411	0.453748	0.0406051	2.52332	0.590268	4.07923	0.517373	30.2953	863.205	1.08214	1.53169	2.52332	0.590922	0.188281	0.522167	0.0474799	4.40541	0.145085	3.57652	0.398814	29.8649	841.227	0.962858	1.42892	4.40541	0.674092	0.135387	0.432886	9.37e-07	12	200	s
727	192	47	7.40466	1.30272	4.92341	9.36412	45.8583	427.388	19.4588	0.731872	0.0813257	0.0476334	1.45415	0.664615	3.16788	0.599152	32.7205	1011.38	1.03198	1.41032	1.45415	0.493607	0.179213	0.49236	0.0407	2.89404	0.314595	3.11119	0.486054	32.6026	1006.9	0.958567	1.46669	2.89404	0.611542	0.0654511	0.307374	6.34e-07	10	482	s
728	161	49	6.69685	2.24828	1.16738	10.1456	173.041	429.947	20.2593	0.784342	0.340059	0.0258317	3.31835	0.763662	8.02035	0.534071	31.0701	915.789	1.22009	1.70897	3.31835	0.650568	0.216753	0.583058	0.0241341	7.07407	0.50546	8.15218	0.404563	30.2407	865.76	1.18518	1.68852	7.07407	0.761223	0.198367	0.557247	8.68e-07	11	652	s
729	164	46	7.41078	2.25962	3.59597	11.1617	132.025	430.908	23.3505	0.89949	-0.631445	0.0272171	4.33741	0.696199	8.13858	0.479856	27.0717	691.567	1.23856	1.74783	4.33741	0.697341	0.191732	0.556518	0.0268689	10.5691	0.297328	8.52066	0.35683	26.5691	663.994	1.18248	1.70728	10.5691	0.84927	0.133885	0.466132	8.6e-07	12	1625	s
730	91	32	5.11572	1.43895	2.77985	7.46509	460.125	427.481	15.8428	0.865201	-0.286025	0.0263929	6.16938	0.540472	7.71274	0.386581	26.43	657.196	1.20072	1.7772	6.16938	0.75877	0.131751	0.470864	0.0211628	15.1642	0.0112712	8.66852	0.258038	26.2687	646.384	1.15144	1.77272	15.1642	0.924956	0.118009	0.446471	8.92e-07	9	130	s
731	160	50	7.23258	2.7207	3.27835	11.5667	236.903	428.734	25.2625	0.935371	-0.00875753	0.0260076	6.52973	0.548871	8.2371	0.454304	25.6072	616.38	1.23589	1.82282	6.52973	0.770571	0.12572	0.46576	0.0302715	9.94068	0.196452	7.18549	0.360587	25.1441	591.833	1.12259	1.69987	9.94068	0.840211	0.0942231	0.393342	8.77e-07	8	352	s
732	110	38	5.59786	1.23986	2.61482	7.83685	285.323	432.886	15.772	0.770585	-0.690976	0.0276983	3.28495	0.658073	5.80358	0.49229	30.3602	868.419	1.16278	1.66416	3.28495	0.644408	0.166894	0.511293	0.026782	7.56471	0.266085	6.15367	0.366395	30.5059	877.432	1.10551	1.64909	7.56471	0.794142	0.136015	0.46249	9.23e-07	11	302	s
733	110	37	5.3909	1.12685	2.62385	7.02838	588.236	433.069	13.4767	0.457092	0.786865	0.046048	1.87733	0.559778	3.13226	0.56815	33.7387	1077.81	1.01015	1.44425	1.87733	0.539575	0.131538	0.428959	0.04405	3.57692	0.166766	3.14641	0.434581	33.3974	1058.15	0.945323	1.46293	3.57692	0.636068	0.0650499	0.306072	9.22e-07	12	148	s
734	130	45	6.70089	2.64318	2.45865	11.2032	681.633	432.287	23.1813	0.945417	-0.41159	0.0801328	1.28539	0.628206	2.72863	0.65456	36.6507	1281.86	0.926252	1.26429	1.28539	0.482861	0.167742	0.454587	0.0768141	2.25	0.300725	2.60881	0.555672	36.7024	1289.07	0.857151	1.29398	2.25	0.564434	0.0654078	0.289446	8.97e-07	8	268	s
735	88	34	5.26466	2.00553	2.29374	8.37869	414.691	432.031	18.4453	0.932675	-0.422423	0.0137693	8.15172	0.568403	10.4437	0.316633	28.5793	773.166	1.31133	1.94268	8.15172	0.798272	0.121494	0.471384	0.0157551	21.4138	-0.0395105	11.2999	0.16153	28.7241	776.761	1.21096	1.83472	21.4138	0.943334	0.151489	0.50962	9.14e-07	9	136	s
736	93	31	5.06541	1.20537	2.47274	7.11325	558.644	434.078	15.0239	0.805134	-1.3511	0.0171747	5.49367	0.687613	9.79305	0.427826	30.1329	861.789	1.28658	1.8494	5.49367	0.725954	0.176726	0.548897	0.0166522	15.9412	0.208742	11.0733	0.252208	29.9706	849.889	1.23843	1.83685	15.9412	0.917982	0.142876	0.496189	9.18e-07	12	121	s
737	108	39	5.72809	2.10013	1.95697	8.79738	210.367	433.021	20.1467	0.922396	-0.179379	0.0271253	5.06044	0.536919	6.46389	0.453377	28.4341	759.686	1.17804	1.75097	5.06044	0.726778	0.121769	0.450677	0.0220948	11.974	0.0532871	7.324	0.320265	28.2338	748.886	1.11249	1.74816	11.974	0.87573	0.119793	0.446869	8.66e-07	10	352	s
738	165	64	7.80634	2.5891	3.88887	12.7217	86.4232	437.04	23.1494	0.878292	0.170188	0.042971	2.02004	0.634109	3.76043	0.553649	33.7905	1080.7	1.05396	1.49926	2.02004	0.553929	0.155559	0.472705	0.0403521	4.06977	0.190246	3.51296	0.47365	34.1008	1104.39	0.958605	1.45828	4.06977	0.674414	0.0507814	0.270495	7.74e-07	11	1625	s
739	165	64	7.80634	2.5891	3.88887	12.7217	86.4232	437.04	23.1494	0.878292	0.170188	0.042971	2.02004	0.634109	3.76043	0.553649	33.7905	1080.7	1.05396	1.49926	2.02004	0.553929	0.155559	0.472705	0.0403521	4.06977	0.190246	3.51296	0.47365	34.1008	1104.39	0.958605	1.45828	4.06977	0.674414	0.0507814	0.270495	7.74e-07	11	1625	s
740	66	30	4.31967	1.63008	2.06155	6.57647	335.749	435.107	15.4859	0.930918	-0.0207307	0.0212149	5.723	0.555469	7.43713	0.396909	31.3662	930.422	1.19342	1.76551	5.723	0.74086	0.115291	0.440754	0.044	10.66	0.0282766	6.4851	0.286843	32.86	1023.61	1.04292	1.49873	10.66	0.80481	0.114214	0.407454	9.53e-07	10	104	s
741	128	47	7.00194	3.35475	0.711097	12.1784	598.176	442.805	27.8208	0.965586	-0.795151	0.0166062	7.32471	0.623751	10.7339	0.38148	28.2847	760.34	1.28973	1.89934	7.32471	0.793218	0.12733	0.477102	0.0178475	12.7093	0.310549	10.217	0.251928	28.8023	784.116	1.235	1.79937	12.7093	0.857036	0.158802	0.516564	9.32e-07	9	226	s
742	193	60	8.24746	3.13032	2.61672	13.2771	111.577	441.048	27.1757	0.918442	0.105547	0.0486998	2.11244	0.591928	3.58832	0.6113	33.3898	1054.13	1.04957	1.47198	2.11244	0.561197	0.167686	0.48598	0.0389536	2.98621	0.42769	3.60891	0.505318	33.5241	1063.34	1.02965	1.51632	2.98621	0.628874	0.112307	0.406305	8.25e-07	9	1625	s
743	112	33	5.59184	1.18546	3.57075	7.5091	188.861	444.146	15.9171	0.790464	-0.279473	0.022422	5.09021	0.600425	7.36952	0.458678	29.1933	802.488	1.22725	1.78191	5.09021	0.723392	0.158179	0.513481	0.0245727	10.5897	0.148228	7.21631	0.343475	28.8205	780.742	1.13539	1.68016	10.5897	0.861796	0.0998949	0.402416	8.62e-07	8	143	s
744	112	33	5.59184	1.18546	3.57075	7.5091	188.861	444.146	15.9171	0.790464	-0.279473	0.022422	5.09021	0.600425	7.36952	0.458678	29.1933	802.488	1.22725	1.78191	5.09021	0.723392	0.158179	0.513481	0.0245727	10.5897	0.148228	7.21631	0.343475	28.8205	780.742	1.13539	1.68016	10.5897	0.861796	0.0998949	0.402416	8.62e-07	8	143	s
745	304	60	9.70258	1.84474	6.95991	13.6604	295.91	447.531	25.2742	0.731552	-0.174386	0.0426692	1.12985	0.840583	4.54369	0.658171	32.6141	1004.43	1.12777	1.4481	1.12985	0.457265	0.307716	0.639849	0.0301961	2.71765	0.634178	4.71444	0.508422	32.4902	996.905	1.10923	1.58121	2.71765	0.606368	0.144305	0.466921	9.49e-07	9	364	s
746	149	48	6.99251	2.66084	3.10305	11.2696	241.402	449.211	24.2073	0.936882	-0.285341	0.0199264	4.53606	0.701261	8.59203	0.438244	29.7875	840.021	1.25353	1.82038	4.53606	0.70562	0.157948	0.517831	0.0191283	10.5421	0.327629	8.83946	0.278259	29.3832	813.587	1.22698	1.8076	10.5421	0.836388	0.137284	0.483632	8.94e-07	8	360	s
747	161	48	6.86052	1.6586	4.15519	10.0008	220.56	450.774	19.6712	0.793672	-0.0738511	0.0269769	4.85943	0.676872	8.51935	0.451132	27.5036	715.554	1.22932	1.75553	4.85943	0.721106	0.165304	0.520759	0.0290281	12.0496	0.32979	9.98941	0.368214	27.2893	705.98	1.17276	1.66817	12.0496	0.861593	0.122508	0.442304	8.78e-07	6	360	s
748	100	33	5.20306	0.843447	3.60619	6.56933	555.768	451.639	13.8209	0.644922	-0.0089784	0.0165265	5.96784	0.663953	9.87947	0.397933	27.4006	710.789	1.30003	1.90359	5.96784	0.748733	0.153503	0.520868	0.0188166	9.10769	0.337237	7.87101	0.27406	26.1538	641.513	1.19115	1.79307	9.10769	0.795132	0.173156	0.536811	9.34e-07	10	64480	s
749	353	79	10.4452	3.77156	2.08427	17.7501	683.462	459.373	32.9091	0.862625	0.0168658	0.0172459	3.63865	0.722451	7.55496	0.455234	31.0935	912.48	1.26231	1.82633	3.63865	0.657714	0.166262	0.530965	0.0147684	8.79021	0.369924	7.97551	0.314498	31.0839	910.385	1.22972	1.8964	8.79021	0.81376	0.0745299	0.369515	9.38e-07	7	714	s
750	368	88	12.075	5.12259	4.02257	20.3213	749.796	474.386	45.3118	0.96791	-1.48631	0.0229353	2.5584	0.823349	8.24138	0.535869	29.8877	845.86	1.26163	1.73521	2.5584	0.596009	0.244158	0.618717	0.0161494	6.79545	0.57307	8.95851	0.374135	29.6721	833.032	1.24685	1.86595	6.79545	0.770644	0.117414	0.455687	9.83e-07	6	512	s
751	155	49	7.20182	2.8629	2.64552	11.7151	21.7081	460.921	25.8759	0.946482	0.362799	0.0357208	2.22472	0.622932	3.95002	0.53366	33.0375	1030.08	1.09212	1.54927	2.22472	0.564228	0.154649	0.478222	0.0331622	4.61468	0.274242	4.17921	0.384088	32.4679	994.893	1.05467	1.60404	4.61468	0.677799	0.0947626	0.384036	4.79e-07	3	198	s
752	159	50	6.72442	2.73499	0.286356	10.7982	73.7876	459.646	23.1128	0.905113	-0.068649	0.0637487	1.5146	0.48714	2.47662	0.62076	35.3175	1188.37	0.908554	1.28774	1.5146	0.513596	0.100652	0.357181	0.0700916	1.9469	0.128086	2.11645	0.546903	35.3805	1198.78	0.793538	1.17569	1.9469	0.535912	0.0115792	0.116617	7.1e-07	6	212	s
753	262	77	9.62869	3.82097	0.522394	16.9231	706.025	465.128	32.715	0.894765	-0.707286	0.0253349	4.18579	0.609212	6.35558	0.481014	31.1672	914.999	1.20453	1.78236	4.18579	0.688287	0.125956	0.461572	0.0229717	7.54359	0.281203	6.24737	0.368312	31.1026	910.625	1.14961	1.77535	7.54359	0.781044	0.0906632	0.393896	9.48e-07	9	714	s
754	105	32	5.42892	0.917728	3.21571	7.03764	596.698	462	14.2992	0.715336	-0.873858	0.0562063	2.55801	0.559732	3.90506	0.538399	30.8564	898.295	1.03634	1.46783	2.55801	0.598708	0.1347	0.437071	0.0858837	5.6962	0.186983	4.50312	0.454561	31.0127	911.173	0.965076	1.32564	5.6962	0.747652	0.116281	0.38855	9.54e-07	9	134	s
755	88	31	5.06551	1.51004	2.74668	7.3701	553.199	463.784	15.8273	0.855677	-1.20201	0.0151962	7.84014	0.519883	9.16482	0.364233	26.2619	649.821	1.26187	1.92783	7.84014	0.799608	0.108302	0.445058	0.0269421	15.4	0.0349978	8.97926	0.273849	25.2545	597.159	1.15803	1.6392	15.4	0.895877	0.134094	0.458155	9.45e-07	9	64480	s
756	61	23	4.00721	0.664323	2.49801	5.15635	572.291	461.387	10.7113	0.711012	-1.16209	0.0565704	1.71144	0.527505	2.81107	0.583963	34.5274	1132.17	0.961881	1.35016	1.71144	0.520872	0.111062	0.383152	0.0467687	3.78571	0.0362941	2.96414	0.432288	34.6905	1146.09	0.896776	1.40256	3.78571	0.64872	0.0489671	0.260734	9.49e-07	9	65	s
757	316	68	9.86419	2.20176	5.56485	14.1659	651.799	468.088	25.0844	0.565615	-1.54763	0.0273712	2.9317	0.733794	6.50646	0.545027	27.8476	728.251	1.21763	1.70564	2.9317	0.614366	0.212642	0.577566	0.0197337	6.20385	0.492128	7.10769	0.396543	27.8038	726.593	1.1887	1.81528	6.20385	0.751652	0.119717	0.454296	9.56e-07	4	853	s
758	303	67	10.0238	3.17926	4.88963	15.7266	150.18	470.034	32.4807	0.910663	-0.319386	0.0272144	3.05196	0.795279	8.45396	0.517463	28.0036	742.653	1.24754	1.74747	3.05196	0.635599	0.220645	0.593033	0.0245472	7.21545	0.497161	8.17471	0.363972	27.5488	716.066	1.19384	1.80996	7.21545	0.785515	0.0989296	0.414364	8.58e-07	5	1313	s
759	309	59	9.61825	1.72963	5.67981	12.6688	631.249	471.996	25.1181	0.72951	-1.04882	0.0468593	2.18617	0.753937	5.4423	0.57489	28.9379	788.045	1.14474	1.56904	2.18617	0.569133	0.208688	0.553364	0.0356915	4.54251	0.475125	5.32723	0.456893	28.5425	765.794	1.10116	1.64888	4.54251	0.705737	0.105886	0.410315	9.64e-07	7	853	s
760	403	91	12.1255	4.49003	4.29535	20.6509	122.318	473.471	38.9364	0.892093	-0.145237	0.0243397	3.37423	0.774404	8.47849	0.532489	27.9678	738.549	1.28428	1.79146	3.37423	0.647901	0.228959	0.608878	0.0232121	8.12158	0.46513	8.59211	0.418164	27.6657	720.511	1.24097	1.83229	8.12158	0.815594	0.124713	0.465062	8.3e-07	5	1313	s
761	108	39	5.71818	1.83345	2.51504	8.81097	615.034	473.062	18.3851	0.896603	-0.425838	0.0203214	4.54972	0.649003	7.48114	0.428121	28.7155	776.447	1.23689	1.802	4.54972	0.699785	0.143374	0.492888	0.0286726	9.63636	0.16896	6.79777	0.326189	28.2857	752.834	1.09602	1.63967	9.63636	0.831961	0.155353	0.491248	9.66e-07	7	853	s
762	198	48	7.61821	1.49908	4.5216	10.4536	577.949	477.181	20.6473	0.748184	-0.437918	0.0236491	4.17822	0.572595	5.8879	0.4451	29.1683	798.703	1.18029	1.74499	4.17822	0.685266	0.11037	0.42943	0.0250359	8.02041	0.131535	5.61758	0.360599	28.7687	776.446	1.09208	1.72534	8.02041	0.81181	0.0744219	0.353348	9.66e-07	8	235	s
763	357	73	10.6178	2.59748	6.4368	15.7187	73.7028	480.77	30.2664	0.823643	0.540969	0.0370391	1.9341	0.741046	4.73444	0.590982	30.7356	889.62	1.12792	1.53929	1.9341	0.545547	0.211398	0.55228	0.0284778	3.88215	0.467299	4.64384	0.430529	30.5354	877.974	1.08572	1.6312	3.88215	0.657352	0.0986408	0.394592	7.04e-07	6	1313	s
764	247	64	9.24865	2.31361	5.07755	14.715	678.463	479.105	25.0645	0.812549	-0.493776	0.0143981	5.14581	0.685323	9.17633	0.406188	28.6039	772.958	1.30192	1.92202	5.14581	0.726223	0.147712	0.513824	0.0149534	11.1865	0.266629	8.62679	0.284158	28.3679	756.861	1.21019	1.88403	11.1865	0.856139	0.0820872	0.385929	9.69e-07	9	478	s
765	53	22	3.66012	0.56973	2.68951	4.67652	772.289	477.432	9.76502	0.669912	-1.23543	0.0322641	3.34302	0.45009	4.03961	0.480851	30.25	860.435	1.06748	1.57503	3.34302	0.646463	0.0962392	0.38368	0.0447531	6.91667	0.138035	5.01215	0.324261	31.25	926.599	0.960287	1.45666	6.91667	0.737556	0.174609	0.493167	1.02e-06	6	70	s
766	173	47	7.28549	1.6351	4.61879	10.4806	709.696	483.255	20.1962	0.789128	-0.610778	0.0385296	4.59704	0.638917	7.36563	0.510562	23.1332	502.841	1.17927	1.67972	4.59704	0.705217	0.182373	0.534923	0.0404697	10.2061	0.28407	8.12786	0.376531	23	497.174	1.11692	1.65734	10.2061	0.8542	0.123408	0.442559	9.75e-07	11	437	s
767	142	40	6.32926	1.08822	4.72824	8.35501	728.602	487.167	17.0962	0.721204	1.5255	0.0230501	4.31062	0.733264	9.0803	0.473125	25.2926	604.672	1.2788	1.81054	4.31062	0.6986	0.183378	0.553326	0.0237685	9.0531	0.469073	9.52575	0.28736	25.6195	620.376	1.22016	1.72034	9.0531	0.802424	0.19638	0.558974	9.84e-07	9	177	s
768	390	71	11.514	3.36015	5.48842	17.1693	635.637	494.538	34.5357	0.877525	-0.681014	0.0215446	3.23443	0.793636	8.83673	0.527719	28.133	748.157	1.29931	1.79979	3.23443	0.639596	0.225813	0.606254	0.0179209	7.2561	0.545749	8.98688	0.394212	27.939	735.887	1.27077	1.82517	7.2561	0.789899	0.140185	0.490449	9.9e-07	9	792	s
769	65	25	4.09973	0.762253	2.8445	5.28878	561.162	488.804	11.8492	0.749607	-1.51778	0.0163764	7.82326	0.551043	9.71271	0.339806	26.7442	675.36	1.28181	1.88072	7.82326	0.804133	0.158162	0.525383	0.0283934	16.8421	-0.0410068	9.08934	0.231548	24.8947	582.374	1.08595	1.60937	16.8421	0.895822	0.221433	0.574607	9.68e-07	9	82	s
770	211	62	8.94974	3.37254	3.98938	15.9752	691.821	494.138	29.8593	0.932744	-0.609327	0.0278842	4.35616	0.498512	5.34324	0.466569	28.4822	759.456	1.16116	1.72755	4.35616	0.691842	0.107804	0.422711	0.0298734	6.94231	0.212538	5.40803	0.416707	28.3526	753.678	1.09476	1.65866	6.94231	0.775491	0.0965202	0.393479	9.89e-07	10	437	s
771	135	36	6.21287	1.2139	3.89573	8.17578	611.293	491.119	17.2509	0.782083	-0.474813	0.0284098	3.51477	0.658396	6.14451	0.520788	28.9958	790.432	1.18628	1.6875	3.51477	0.651206	0.178661	0.530887	0.0360111	5.58947	0.395684	5.62463	0.455914	28.6211	769.609	1.11286	1.5587	5.58947	0.737976	0.144164	0.46376	9.84e-07	8	792	s
772	125	35	5.95811	0.780174	4.3662	7.53701	21.1087	492.952	14.9443	0.644078	-1.07591	0.0583548	1.56338	0.549484	2.7351	0.608113	33.9108	1091.66	0.951995	1.3399	1.56338	0.515526	0.120255	0.396923	0.0453448	3.75824	0.0729775	3.02705	0.42518	33.8462	1089.8	0.900041	1.42274	3.75824	0.647672	0.0586369	0.286975	4.63e-07	5	0	s
773	193	46	7.63671	1.4703	5.43713	10.3964	665.749	493.834	20.8065	0.778303	-0.630053	0.0289581	3.5225	0.705779	6.98615	0.522709	27.6763	720.848	1.21078	1.70412	3.5225	0.66232	0.197191	0.557845	0.0231385	7.10204	0.382587	6.75145	0.385202	27.0884	687.858	1.16635	1.74674	7.10204	0.778895	0.123878	0.453871	9.89e-07	10	478	s
774	128	36	6.11278	1.12648	3.74217	8.39997	34.6265	494.197	17.2195	0.780875	0.677123	0.022477	3.98876	0.72902	8.35989	0.473605	26.1101	642.788	1.26384	1.78623	3.98876	0.676009	0.197298	0.568871	0.0219164	8.52174	0.361021	7.66824	0.333336	25.3913	604.457	1.17756	1.74245	8.52174	0.809519	0.123715	0.453092	5.31e-07	7	294	s
775	185	45	7.40465	1.70397	4.56811	10.2416	755.086	501.001	21.9181	0.837406	-0.771377	0.0275939	3.35964	0.729464	7.20921	0.508754	26.7678	673.424	1.23458	1.73337	3.35964	0.647575	0.219579	0.589827	0.0245268	7.90476	0.399312	7.57976	0.363119	26.6122	664.649	1.1911	1.72957	7.90476	0.802236	0.140423	0.479459	1.02e-06	10	245	s
776	45	21	3.32691	0.775004	1.77217	4.36955	111.288	496.227	9.94681	0.788119	0.1786	0.0307975	2.92958	0.496299	3.90805	0.461806	31.662	945.458	1.05551	1.54624	2.92958	0.603888	0.113139	0.411402	0.0607639	6.16667	0.0342577	4.19271	0.364361	31.25	925.318	0.939711	1.316	6.16667	0.720088	0.103821	0.366343	8.31e-07	9	78	s
777	113	39	5.85104	2.10678	1.75954	9.28846	128.552	498.288	19.8593	0.90862	-0.194511	0.0271169	3.23822	0.540124	4.52076	0.461874	31.1283	912.131	1.10684	1.63402	3.23822	0.629628	0.113162	0.421885	0.0406268	4.75342	0.142093	3.77036	0.408672	30.9726	907.015	0.961163	1.51798	4.75342	0.681772	0.0895767	0.364258	8.7e-07	9	157	s
778	116	32	5.66863	0.543439	4.8	6.66915	708.131	499.192	13.7741	0.554824	-0.792373	0.0285617	2.58128	0.696165	5.24783	0.523545	29.5862	821.885	1.17011	1.63943	2.58128	0.595953	0.179647	0.525783	0.0292593	5.98889	0.32026	5.40528	0.382667	29.6333	824.843	1.11647	1.63682	5.98889	0.746615	0.10049	0.398773	9.94e-07	12	128	s
779	149	48	7.31784	3.14729	2.45418	12.0961	150.614	501.933	27.2203	0.958483	-0.472523	0.0324107	4.7387	0.572427	6.54139	0.434593	27.8939	731.881	1.16463	1.67903	4.7387	0.711304	0.125011	0.447882	0.040595	11.4907	0.0826252	7.26284	0.314946	27.9352	733.068	1.11154	1.58522	11.4907	0.862511	0.069908	0.329371	9.1e-07	11	189	s
780	145	48	6.93709	2.19315	2.90548	10.8927	610.63	503.045	21.3768	0.881798	-0.306738	0.0246501	3.6336	0.701038	7.07703	0.479938	27.5931	715.167	1.2399	1.751	3.6336	0.662874	0.19089	0.555816	0.0245436	8.11215	0.30799	6.8613	0.342404	27.5327	710.688	1.16312	1.70942	8.11215	0.800953	0.122704	0.447499	9.93e-07	10	792	s
781	269	69	8.01387	2.55997	0.756544	11.4913	77.7465	506.521	21.9926	0.61618	-0.223297	0.0387763	1.74187	0.71585	4.06505	0.588508	32.0063	965.945	1.09631	1.50917	1.74187	0.528696	0.199538	0.533209	0.0258702	4.32407	0.420752	4.73249	0.42562	31.8796	957.751	1.1039	1.6485	4.32407	0.686955	0.0763587	0.350245	7.36e-07	7	903	s
782	269	69	8.01387	2.55997	0.756544	11.4913	77.7465	506.521	21.9926	0.61618	-0.223297	0.0387763	1.74187	0.71585	4.06505	0.588508	32.0063	965.945	1.09631	1.50917	1.74187	0.528696	0.199538	0.533209	0.0258702	4.32407	0.420752	4.73249	0.42562	31.8796	957.751	1.1039	1.6485	4.32407	0.686955	0.0763587	0.350245	7.36e-07	7	903	s
783	253	71	8.83322	2.32082	3.22129	13.499	56.8549	509.84	24.5862	0.77314	0.0981538	0.0609753	1.62247	0.654893	3.35068	0.626045	32.1483	977.726	1.00436	1.3688	1.62247	0.523748	0.168325	0.471621	0.0478839	3.52913	0.28906	3.48201	0.456998	31.9369	965.36	0.96979	1.43034	3.52913	0.641693	0.041832	0.24348	6.47e-07	6	903	s
784	169	44	7.42341	2.3254	3.14557	11.1756	585.148	508.508	24.0597	0.907537	-0.570174	0.0264614	4.38655	0.662651	7.5015	0.490295	27.2067	697.832	1.20264	1.7552	4.38655	0.697043	0.178974	0.540173	0.0206616	10.1418	0.355134	8.86349	0.364181	27.2313	698.684	1.20498	1.79391	10.1418	0.851279	0.11799	0.448811	9.89e-07	12	193	s
785	141	39	6.30548	1.09463	3.97965	7.86043	551.722	507.902	17.2716	0.724549	-0.28712	0.0257484	4.75758	0.77376	11.5144	0.45627	27.2222	709.216	1.30087	1.83337	4.75758	0.717002	0.206474	0.58681	0.0286579	12.6321	0.406068	11.6343	0.302651	26.7075	678.977	1.23065	1.73938	12.6321	0.889303	0.135968	0.473408	9.73e-07	12	190	s
786	231	51	8.20657	1.20268	5.74028	10.5315	43.0058	523.59	19.9888	0.58293	-1.20617	0.0794357	1.52398	0.758511	4.15539	0.655692	30.0659	854.037	1.03253	1.33707	1.52398	0.52002	0.25177	0.565357	0.0604629	3.54255	0.445	4.19149	0.512973	30	849.955	1.00462	1.38789	3.54255	0.649742	0.103389	0.37473	5.89e-07	7	903	s
787	153	42	6.71284	1.73309	3.46835	9.63036	531.493	519.573	20.1341	0.826457	-0.540122	0.0207408	4.78399	0.6457	7.75132	0.44107	25.1155	591.247	1.26119	1.82896	4.78399	0.712446	0.165263	0.529817	0.021172	10.6087	0.24591	8.0341	0.288187	24.7478	572.914	1.18119	1.79106	10.6087	0.835434	0.12014	0.452345	9.65e-07	11	194	s
788	62	24	4.11332	0.998616	2.5	5.59017	685.033	517.427	12.1865	0.839666	-0.471697	0.0749351	1.38916	0.497136	2.38125	0.618024	34.9163	1162.49	0.881646	1.22607	1.38916	0.490669	0.11072	0.365867	0.0782872	2.5	-0.0666175	2.17193	0.487024	34.5588	1143.98	0.768474	1.18604	2.5	0.568323	0.0291046	0.185533	1.01e-06	15	58	s
789	64	24	4.07614	0.496148	3.34996	4.95536	562.327	520.506	10.1527	0.446894	-0.963744	0.0185119	6.23113	0.594167	8.67697	0.375134	28.3066	756.239	1.25549	1.82962	6.23113	0.753586	0.163916	0.527905	0.0233399	13.5641	0.0190895	7.91404	0.233636	27.5641	715.47	1.08056	1.67393	13.5641	0.836571	0.214932	0.575982	9.83e-07	12	91	s
790	155	50	6.67782	2.02967	1.52552	9.72868	730.784	526.057	19.609	0.80415	1.05612	0.0325488	2.99251	0.545498	4.29207	0.507799	30.7191	887.341	1.10213	1.60469	2.99251	0.6271	0.123366	0.436129	0.0290577	5.19643	0.157546	4.0841	0.370917	30.6964	887.239	1.02996	1.62472	5.19643	0.708137	0.0857893	0.368134	1.02e-06	13	876	s
791	574	88	13.317	2.60355	5.83331	18.2297	621.885	533.044	34.9417	0.743652	-1.04893	0.025992	2.30675	0.850854	8.73321	0.590988	28.8715	789.832	1.28153	1.73378	2.30675	0.576722	0.289419	0.666209	0.019513	4.85685	0.673607	8.44019	0.465512	28.7681	782.12	1.25058	1.83817	4.85685	0.716885	0.165206	0.530856	1.01e-06	11	2048	s
792	458	98	13.6594	5.75723	4.41228	23.8032	589.758	539.094	48.5275	0.948913	-0.808499	0.0392164	1.81461	0.792893	5.38086	0.575856	32.189	979.999	1.13598	1.56047	1.81461	0.53449	0.226505	0.573357	0.035521	4.45845	0.531673	5.75997	0.47296	32.0188	969.455	1.11774	1.65166	4.45845	0.696995	0.114401	0.426156	1e-06	11	2048	s
793	390	69	10.7958	1.97121	7.10885	14.4152	763.817	534.667	29.2042	0.772178	-1.54165	0.0483951	0.867453	0.871638	4.37894	0.687856	30.5746	879.133	1.13849	1.41305	0.867453	0.414211	0.358497	0.678639	0.0345987	2.22188	0.647552	4.15207	0.522833	30.1733	855.942	1.09481	1.5447	2.22188	0.560104	0.164288	0.491484	1.05e-06	8	929	s
794	316	69	11.4156	4.64173	4.53255	18.954	485.499	534.87	40.3638	0.961058	-0.703865	0.0240187	3.71479	0.723301	7.71269	0.472681	27.4085	708.16	1.23548	1.75978	3.71479	0.656066	0.178056	0.539485	0.0188609	8.91538	0.371096	8.08803	0.341103	27.3308	702.164	1.20173	1.83434	8.91538	0.810977	0.0696797	0.352187	9.5e-07	6	595	s
795	100	35	5.74502	2.07779	2.42437	8.82483	572.518	532.959	20.0038	0.933344	-1.0025	0.0287414	7.45672	0.486569	8.26165	0.419482	25.5582	615.094	1.19627	1.7861	7.45672	0.795126	0.112871	0.438605	0.0339533	15.9706	-0.0051176	8.94464	0.315757	25.4706	609.52	1.10438	1.63594	15.9706	0.915587	0.113455	0.422633	9.91e-07	15	129	s
796	177	58	7.74476	2.65024	3.29761	13.0309	782.355	531.638	25.9131	0.91289	0.0276474	0.019768	4.24836	0.718425	8.5439	0.462061	26.653	670.524	1.26405	1.81294	4.24836	0.689632	0.188383	0.560457	0.0180621	11.1504	0.314944	9.13829	0.308311	26.4286	657.105	1.21544	1.82304	11.1504	0.851204	0.122896	0.460824	1.08e-06	6	929	s
797	135	38	6.24493	1.45887	3.53612	8.30529	12.486	533.339	17.8752	0.823025	-0.413309	0.0357396	1.98514	0.768034	5.27894	0.568095	29.9682	844.139	1.17564	1.56771	1.98514	0.531863	0.263323	0.615117	0.0306198	4.54545	0.448113	5.1181	0.423237	29.9818	844.927	1.12008	1.6075	4.54545	0.687613	0.150398	0.47963	4.31e-07	6	214	s
798	56	24	3.79439	0.822943	1.62286	4.94641	546.729	531.593	10.7133	0.73101	-0.823557	0.033408	2.87079	0.47662	3.74254	0.461419	33.5674	1066.24	1.03833	1.52945	2.87079	0.594822	0.0923845	0.371066	0.0467128	7.67647	0.013726	4.89165	0.358168	33.1471	1042.96	0.974628	1.38513	7.67647	0.794095	0.0989157	0.366379	9.76e-07	13	383	s
799	80	28	4.62001	0.870376	2.97095	5.82833	720.791	539.264	12.4637	0.707562	1.51829	0.0175103	5.84444	0.601749	8.33764	0.401538	28.8593	785.689	1.25161	1.83944	5.84444	0.738	0.159166	0.521981	0.0300826	9.41818	0.361612	8.37653	0.333832	29.0545	797.936	1.16461	1.61292	9.41818	0.801306	0.1177	0.427398	1.03e-06	13	876	s
800	222	58	8.14319	3.07289	1.58255	13.0683	538.863	541.583	27.5373	0.893661	-0.34104	0.0182151	4.40944	0.690784	8.13003	0.445345	28.6084	772.103	1.25897	1.85508	4.40944	0.697014	0.169273	0.538885	0.0168599	9.82456	0.395757	9.12965	0.348471	28.2573	753.557	1.22282	1.87574	9.82456	0.843687	0.150358	0.512686	9.73e-07	11	383	s
801	154	45	6.88122	2.12077	3.53333	10.5681	732.048	545.544	21.7418	0.894969	-1.26864	0.0224949	3.65428	0.699365	7.0776	0.463798	27.7844	725.806	1.22972	1.77798	3.65428	0.660232	0.177763	0.541404	0.0223687	9.83471	0.31038	8.13052	0.288369	27.9174	733.364	1.18391	1.75775	9.83471	0.818661	0.138865	0.480334	1.03e-06	10	876	s
802	128	37	6.06406	1.26939	3.7553	8.13531	790.659	543.243	17.8372	0.803697	-0.539837	0.0193071	5.36771	0.682314	9.44815	0.443091	25.4978	615.195	1.27443	1.85439	5.36771	0.737702	0.166917	0.535351	0.023569	11.4747	0.370225	10.1102	0.314686	25.2727	603.059	1.22917	1.77573	11.4747	0.871836	0.132226	0.471492	1.1e-06	9	929	s
803	99	32	5.24095	1.09697	3.25735	7.07887	516.027	547.479	15.8043	0.81132	-1.31974	0.0217628	7.53392	0.643267	11.5596	0.405981	24.4248	569.438	1.30048	1.87546	7.53392	0.804583	0.179493	0.556006	0.0252686	12.6875	0.25641	9.53125	0.286259	23.25	508.736	1.17517	1.70147	12.6875	0.881166	0.156167	0.500402	9.61e-07	9	117	l
804	388	81	11.444	4.27017	2.34597	18.9642	596.747	558.047	37.4031	0.916118	-0.660162	0.0365034	2.02422	0.756491	5.15635	0.583037	30.916	901.286	1.1387	1.57929	2.02422	0.560857	0.212055	0.558968	0.0293748	4.40566	0.484271	5.2713	0.46935	30.7201	889.72	1.10526	1.67051	4.40566	0.701834	0.115801	0.430844	1.01e-06	10	2048	s
805	186	43	7.55294	1.6777	4.51343	10.3001	460.66	553.687	21.7527	0.837858	-0.764451	0.0298423	2.39699	0.775896	6.34795	0.557183	29.8526	840.163	1.19661	1.65696	2.39699	0.584685	0.232831	0.594798	0.0211028	6.11321	0.518899	7.35335	0.401993	29.7862	836.505	1.19937	1.76571	6.11321	0.74981	0.143068	0.488064	9.48e-07	11	595	s
806	160	41	6.73569	0.972527	4.6593	8.67583	714.11	551.632	17.3789	0.647034	0.497577	0.0326417	4.05282	0.63734	6.58763	0.482146	26.3275	650.714	1.17957	1.70449	4.05282	0.683027	0.152677	0.495513	0.0356074	8.70161	0.312539	7.32881	0.402633	26.1532	642.977	1.12598	1.58022	8.70161	0.804421	0.123149	0.432761	1.03e-06	14	876	s
807	81	33	4.73318	1.61805	1.46993	7.24946	696.135	553.398	15.8982	0.883061	-0.385596	0.0269064	3.97358	0.504994	5.01367	0.466055	30.366	868.116	1.10796	1.6394	3.97358	0.673221	0.131188	0.45343	0.0428994	9.44231	-0.0325346	5.57239	0.312406	30.3654	873.063	0.967831	1.41787	9.44231	0.78367	0.0928961	0.359186	1.03e-06	18	331	s
808	345	76	10.8441	3.3493	4.01531	16.3535	19.2762	565.592	33.6545	0.892247	0.791739	0.0210793	2.94378	0.755193	7.01244	0.498731	29.6843	829.979	1.24364	1.76326	2.94378	0.621925	0.193997	0.561538	0.0202259	5.82069	0.535502	7.26556	0.407916	29.8345	838.466	1.21239	1.79948	5.82069	0.747701	0.136117	0.480755	4.95e-07	7	648	s
809	390	83	10.1842	2.60102	3.21869	13.8789	573.174	566.534	26.6849	0.646564	1.22578	0.0437291	2.28763	0.772386	6.02524	0.584447	31.4353	935.585	1.14059	1.59678	2.28763	0.580198	0.212326	0.56184	0.0401101	4.03571	0.617041	6.26912	0.492869	31.3799	933.186	1.11198	1.65047	4.03571	0.678338	0.142074	0.472316	9.99e-07	13	2048	s
810	139	40	6.6522	2.13675	2.51645	10.2241	538.747	562.574	21.4495	0.895031	-0.944062	0.0351204	2.79834	0.595809	4.46166	0.528975	29.4927	816.981	1.10376	1.57608	2.79834	0.614215	0.1351	0.451839	0.03095	4.95	0.193542	4.06898	0.407805	29.21	801.686	1.02561	1.56954	4.95	0.695032	0.0638517	0.3136	9.77e-07	12	218	s
811	139	40	6.6522	2.13675	2.51645	10.2241	538.747	562.574	21.4495	0.895031	-0.944062	0.0351204	2.79834	0.595809	4.46166	0.528975	29.4927	816.981	1.10376	1.57608	2.79834	0.614215	0.1351	0.451839	0.03095	4.95	0.193542	4.06898	0.407805	29.21	801.686	1.02561	1.56954	4.95	0.695032	0.0638517	0.3136	9.77e-07	12	218	s
812	150	43	6.5947	1.67522	3.1001	9.24757	727.472	563.915	19.3073	0.826543	0.580299	0.02653	2.80725	0.681362	5.40507	0.510815	31.5973	940.571	1.17106	1.68385	2.80725	0.607108	0.166737	0.513644	0.0336777	5.43636	0.342279	5.13273	0.436803	31.6	942.087	1.08783	1.57262	5.43636	0.734602	0.0682691	0.324347	1.04e-06	13	876	s
813	131	48	6.5803	2.42197	2.65762	10.7848	693.713	567.753	22.5346	0.928596	1.35215	0.0282804	4.70068	0.581224	6.61241	0.447251	28.6961	775.654	1.16607	1.69458	4.70068	0.703864	0.119517	0.440209	0.0330003	9.89691	0.176279	7.00744	0.354625	28.6186	770.194	1.12199	1.60174	9.89691	0.819049	0.12417	0.437125	1.03e-06	15	331	s
814	173	42	7.11926	1.40046	4.51164	9.64477	554.388	570.215	19.8611	0.784745	-1.2792	0.025194	3.63636	0.731088	7.76125	0.50507	27.2143	697.276	1.25534	1.77798	3.63636	0.652915	0.199411	0.570544	0.0197963	7.94203	0.481303	8.65574	0.355638	26.9855	685.246	1.24517	1.83229	7.94203	0.777411	0.151199	0.508879	9.89e-07	12	226	s
815	335	87	11.3024	4.87485	4.27611	20.3571	434.124	575.03	40.4326	0.943226	-0.43942	0.0244622	2.9688	0.725096	6.3997	0.530978	30.731	890.091	1.21052	1.71518	2.9688	0.619698	0.185073	0.543299	0.0187808	7.10781	0.375226	6.6883	0.369981	30.6989	887.403	1.17335	1.78261	7.10781	0.763097	0.0867259	0.386295	9.41e-07	13	420	s
816	70	26	4.28705	0.803981	2.88462	5.42907	678.659	571.771	11.8929	0.746958	1.33204	0.03066	3.45923	0.618006	5.52786	0.483367	28.7296	773.855	1.17598	1.63871	3.45923	0.655859	0.164114	0.503945	0.0332031	7.0625	0.271995	5.85059	0.311602	29.3125	808.792	1.09101	1.52666	7.0625	0.748211	0.122386	0.424813	1.03e-06	16	119	s
817	132	35	6.09515	0.612928	4.97873	7.28711	707.705	572.65	14.9915	0.601475	0.917927	0.0346838	2.04516	0.752254	5.12754	0.560412	30.7075	887.883	1.15388	1.56893	2.04516	0.561453	0.226998	0.575193	0.0276442	4.41346	0.516546	5.56451	0.422689	30.8942	899.816	1.12896	1.63771	4.41346	0.688641	0.135587	0.460387	1.03e-06	12	186	s
818	125	36	5.95981	1.19085	3.25427	8.37199	655.15	572.232	16.6916	0.762398	-0.383846	0.0204809	3.64138	0.738466	7.96158	0.435566	29.7011	833.391	1.25495	1.775	3.64138	0.644874	0.198304	0.568717	0.0183377	9.61458	0.351083	8.40818	0.293367	29.4479	817.663	1.20531	1.78904	9.61458	0.828202	0.115044	0.442923	1.03e-06	14	152	s
819	136	36	6.28154	1.23032	4.22304	8.5473	482.735	576.751	17.303	0.791761	-0.456871	0.054181	1.52301	0.692391	3.47557	0.628569	34.0753	1100.94	1.02142	1.38586	1.52301	0.511359	0.197951	0.512332	0.0485569	3.17708	0.308708	3.29793	0.53199	33.7188	1078.36	0.972094	1.45523	3.17708	0.641738	0.0783685	0.334546	9.51e-07	8	244	s
820	103	40	5.77987	1.721	3.24519	8.93763	13.1176	581.812	18.4816	0.89294	0.674251	0.0226254	3.78529	0.783638	9.74758	0.479062	29.9382	853.582	1.26111	1.75915	3.78529	0.655645	0.224461	0.599194	0.0312438	8.01408	0.538953	9.69118	0.32587	29.8451	847.122	1.20294	1.61559	8.01408	0.774021	0.199283	0.548308	4.72e-07	5	648	s
821	63	28	4.17608	0.983498	2.40243	6.02852	694.203	583.18	12.2056	0.75617	1.43137	0.0205172	7.48241	0.583749	9.98786	0.34478	26.1357	647.969	1.24591	1.82584	7.48241	0.770023	0.150316	0.506731	0.0543629	17.0789	0.0297236	9.80107	0.28971	25.9211	638.06	1.02257	1.42638	17.0789	0.895491	0.194188	0.513986	1.03e-06	13	331	s
822	93	33	5.10482	1.31515	2.11036	7.34222	634.905	584.758	14.908	0.827666	-0.0589553	0.16019	0.663462	0.364353	1.52188	0.7375	36.6763	1297.06	0.681374	0.908089	0.663462	0.37809	0.0778905	0.266373	0.132527	1.11111	0.0260601	1.57042	0.653968	36.5079	1288.99	0.621789	0.948547	1.11111	0.456757	0.0451978	0.20716	1.03e-06	12	317	s
823	248	72	8.7234	3.91422	1.25193	15.1945	545.449	591.741	31.7656	0.914606	-0.420717	0.0273973	3.18056	0.661261	5.6947	0.520697	30.3102	863.744	1.18724	1.71613	3.18056	0.641698	0.15713	0.5037	0.0212695	5.96392	0.349302	5.58271	0.371564	30.4175	870.219	1.12842	1.77188	5.96392	0.743384	0.076008	0.361441	9.93e-07	10	333	s
824	117	32	5.68954	0.630657	4.43849	6.92912	621.182	588.442	14.197	0.573381	-0.288515	0.0244647	4.05147	0.685042	7.43177	0.462141	28.674	775.103	1.22539	1.74444	4.05147	0.681259	0.177252	0.536388	0.0221741	9.2907	0.257511	7.25646	0.357461	28.3372	755.234	1.14348	1.73878	9.2907	0.834686	0.140421	0.480572	1.02e-06	14	317	s
825	73	26	4.39501	0.775278	2.88333	5.4142	505.026	589.953	12.2801	0.747001	-1.22265	0.0371204	3.2377	0.620611	5.267	0.485854	30.459	873.996	1.13044	1.59098	3.2377	0.634616	0.153813	0.482568	0.0360331	7.72727	0.271228	6.30157	0.349128	30.7091	892.462	1.06144	1.55695	7.72727	0.768555	0.19017	0.52826	9.66e-07	7	180	s
826	387	92	10.8841	3.70114	3.93984	18.5355	750.024	598.03	34.674	0.882853	-0.504199	0.0210166	2.81495	0.770962	7.14516	0.504602	29.1473	799.723	1.25542	1.75848	2.81495	0.613824	0.212808	0.584936	0.015303	7.44545	0.454359	7.82267	0.35644	29.3485	810.488	1.23011	1.88132	7.44545	0.790302	0.0944288	0.412436	1.07e-06	12	108552	c
827	76	25	4.4856	0.321565	3.77041	5.06123	636.436	593.666	10.9864	0.399306	-0.843363	0.0158821	8.03502	0.627341	11.7807	0.355322	25.2957	610.123	1.31582	1.92275	8.03502	0.805158	0.183434	0.567274	0.0230035	17.1667	0.0781279	10.3108	0.230807	24.0833	544.572	1.18147	1.72975	17.1667	0.903642	0.246585	0.620672	1.03e-06	14	317	s
828	59	23	4.0405	0.940304	2.696	5.466	404.68	597.073	12.0625	0.835128	-0.66629	0.0456814	3.44792	0.445542	4.10927	0.465323	30.4792	875.546	1.04183	1.48341	3.44792	0.636836	0.133922	0.437924	0.0697589	6.45946	-0.106966	3.91764	0.381888	30.2432	868.942	0.853943	1.21641	6.45946	0.696636	0.0790314	0.308616	9.22e-07	8	168	s
829	56	24	3.93123	1.21775	1.75	5.70636	446.907	599.227	12.7051	0.888072	-0.473802	0.172935	0.681564	0.338563	1.51521	0.753073	36.2905	1270.62	0.664165	0.894885	0.681564	0.388587	0.091154	0.286212	0.321111	0.733333	-0.0509554	1.34889	0.793333	36.2667	1284.64	0.434069	0.679294	0.733333	0.373863	0.235619	0.407336	9.37e-07	12	342	s
830	66	24	4.14896	0.480195	3.34996	4.95536	705.505	601.622	10.6083	0.498445	0.795012	0.0189153	8.89545	0.510527	10.0868	0.363808	24.0864	548.661	1.25636	1.85878	8.89545	0.822589	0.142213	0.497663	0.039966	18.5714	0.043727	10.7103	0.269278	23.6667	530.539	1.07753	1.5023	18.5714	0.927043	0.130521	0.435007	1.03e-06	12	87	s
831	60	23	3.95841	0.544926	2.81133	4.73095	394.788	603.188	10.2577	0.666216	-0.891063	0.0862042	1.45685	0.494214	2.44019	0.629531	35.4162	1196.45	0.888798	1.21111	1.45685	0.506972	0.109963	0.362555	0.0756803	2.21429	0.0790994	2.20224	0.492857	35.3095	1192.98	0.807504	1.20347	2.21429	0.538377	0.0444644	0.230777	9.14e-07	9	168	s
832	109	37	6.17783	2.43744	2.18133	9.71771	469.565	606.304	21.8279	0.950004	-0.628391	0.0430962	2.84973	0.469013	3.68342	0.514147	30.3525	867.635	1.03095	1.49439	2.84973	0.614682	0.0956849	0.373421	0.0361578	4.87838	0.0463883	3.55784	0.367415	30.2568	863.538	0.961968	1.48365	4.87838	0.675811	0.0443025	0.254969	9.51e-07	9	157	s
833	107	34	5.60602	1.50859	2.72833	8.17652	574.197	605.678	17.0025	0.854912	-0.636913	0.0287184	4.03279	0.591113	5.93143	0.465687	30.0328	849.143	1.16325	1.66341	4.03279	0.687335	0.1307	0.455562	0.04	7.98571	0.108362	5.47811	0.386598	29.2429	805.984	1.02837	1.48249	7.98571	0.778309	0.115232	0.407177	1.02e-06	12	168	s
834	64	24	4.19416	0.904844	2.55087	5.62793	505.141	605.596	12.4057	0.814583	-0.484614	0.0235507	5.53555	0.562147	7.32124	0.378867	28.5877	770.109	1.19498	1.75351	5.53555	0.732071	0.14014	0.481893	0.0373961	11.4737	-0.0378351	6.5277	0.271126	27.6842	720.972	1.0321	1.48572	11.4737	0.810109	0.115566	0.408153	9.75e-07	7	90	s
835	91	33	4.98089	1.5968	1.16971	7.06067	589.129	607.125	15.7261	0.842835	0.127877	0.0352699	2.69079	0.510056	3.74602	0.509434	31.5526	938.458	1.05404	1.53163	2.69079	0.601533	0.114925	0.412737	0.0414685	5.24138	0.130829	4.01516	0.373288	31.2069	920.351	0.982206	1.47768	5.24138	0.708264	0.0708036	0.320609	1.02e-06	16	113	s
836	159	50	6.89986	2.52458	1.71418	11.1668	642.28	610.599	23.2279	0.890397	-0.800756	0.0240611	3.15385	0.657938	5.61005	0.475204	31.0549	908.167	1.17383	1.69088	3.15385	0.623603	0.161216	0.506541	0.0203083	6.65812	0.322994	5.91732	0.347354	30.7436	889.927	1.13083	1.75045	6.65812	0.762211	0.0990351	0.408315	1.03e-06	14	180	s
837	49	22	3.58978	0.967371	1.88184	4.98137	428.501	609.769	11.0167	0.852188	-0.403727	0.0849116	1.13548	0.542804	2.24179	0.633548	35.8839	1229.01	0.881268	1.17194	1.13548	0.444512	0.147627	0.412783	0.0998959	2.6129	0.0193322	2.33221	0.467742	36.1613	1253.88	0.78947	1.06967	2.6129	0.562253	0.0913654	0.311993	9.25e-07	11	342	s
838	68	25	4.29613	0.928238	2.29817	5.63929	483.043	612.126	12.2975	0.794084	-1.08168	0.0403259	2.90222	0.497112	3.88556	0.495061	32.3333	988.522	1.03027	1.52111	2.90222	0.61804	0.113333	0.408682	0.0320661	7.47273	0.0423436	4.90157	0.335203	32.7091	1012.83	1.01214	1.5754	7.47273	0.780744	0.083497	0.358144	9.63e-07	7	154	s
839	49	20	3.65368	0.773386	2.47032	4.74368	21.322	614.045	10.6237	0.817459	-0.902795	0.0391294	2.90446	0.477347	3.77857	0.472577	31.0191	906.977	1.03966	1.4933	2.90446	0.602413	0.114114	0.406606	0.0820452	4.44828	-0.0247911	3.17033	0.375051	30.7931	901.941	0.831335	1.18467	4.44828	0.635617	0.0725255	0.29205	5.53e-07	6	71	s
840	76	29	4.54555	1.21093	2.66054	6.51067	612.982	615.875	14.5962	0.860859	1.39358	0.0211845	6.98814	0.523817	8.33767	0.386617	26.0949	640.754	1.22738	1.83466	6.98814	0.78007	0.11776	0.452903	0.0327996	12.1136	0.0534197	7.39863	0.238493	24.2955	553.049	1.06684	1.57826	12.1136	0.821471	0.151541	0.477499	1.03e-06	15	94	s
841	81	28	4.67097	0.866579	3.25177	6.30779	416.276	614.187	13.0382	0.760454	-0.25791	0.0270992	3.42336	0.622722	5.53692	0.495079	29.4891	817.767	1.15104	1.6729	3.42336	0.645538	0.16106	0.503988	0.0293965	6.74194	0.368457	6.33767	0.321369	29.9355	844.779	1.12281	1.60061	6.74194	0.728888	0.180487	0.521599	9.17e-07	11	342	s
842	59	22	3.90317	0.370329	2.8748	4.40979	475.93	618.166	9.00419	0.307468	0.827755	0.122901	1.14433	0.400551	1.95449	0.656701	34.9175	1167.34	0.790362	1.0769	1.14433	0.464935	0.0854444	0.302731	0.115741	2.16667	0.0633756	2.15664	0.583333	34.6111	1148.08	0.764134	1.10602	2.16667	0.565226	0.0766461	0.290477	9.62e-07	10	154	s
843	106	31	5.37774	0.819782	3.57701	7.29924	958.36	619.799	13.1517	0.555006	0.320644	0.0869708	0.743094	0.711392	2.28737	0.708011	24.2459	548.92	0.911034	1.15275	0.743094	0.386854	0.237921	0.517206	0.0747057	1.51316	0.354291	2.1717	0.559211	24.2763	552.496	0.838696	1.21321	1.51316	0.47202	0.0939247	0.335699	9.5e-07	17	108552	l
844	261	58	8.70708	2.28037	4.10262	12.2222	593.965	624.018	25.8399	0.827375	-0.154696	0.0239175	2.69851	0.757788	6.57057	0.509906	28.9894	790.263	1.22827	1.71899	2.69851	0.60671	0.205945	0.571041	0.0180057	6.88942	0.381389	6.56846	0.360624	28.6394	769.562	1.17713	1.8189	6.88942	0.767884	0.104071	0.425454	1.03e-06	13	328	s
845	464	112	13.8505	7.05866	0.12877	26.4092	536.391	635.568	56.519	0.95819	-0.997724	0.0215382	3.64044	0.673503	6.57499	0.489159	28.362	754.823	1.22965	1.7777	3.64044	0.6627	0.163173	0.520407	0.0181326	7.96703	0.349612	7.12483	0.379111	28.3242	752.65	1.19269	1.85897	7.96703	0.807806	0.0750066	0.367237	1.03e-06	11	586	s
846	67	25	4.15539	0.469789	2.99867	4.88999	673.991	627.396	10.249	0.386124	1.19435	0.0233666	6.75785	0.542946	8.39283	0.373668	26.8565	680.952	1.20229	1.79262	6.75785	0.77163	0.140078	0.486452	0.0379009	20.9796	0.0543311	12.0925	0.290667	26.449	665.161	1.11578	1.5527	20.9796	0.940655	0.148421	0.469428	1.02e-06	8	83	s
847	99	34	5.27239	1.49346	2.12844	7.49123	695.67	626.826	16.3531	0.847906	0.179146	0.0197438	4.6369	0.625915	7.19767	0.442382	28.9167	787.02	1.22432	1.78137	4.6369	0.711489	0.170118	0.530989	0.0212047	13.6849	0.0562116	8.25	0.275108	29	789.876	1.16906	1.72415	13.6849	0.883216	0.0894414	0.386101	1.03e-06	10	131	s
848	149	43	6.74792	2.01575	3.38362	10.2892	492.491	633.353	21.2226	0.882819	-1.31947	0.0346839	4.01156	0.553871	5.49596	0.495545	28.3237	752.79	1.1425	1.63513	4.01156	0.686313	0.128908	0.449139	0.0346939	6.97143	0.166287	5.18095	0.397163	28	736.474	1.04222	1.5682	6.97143	0.773136	0.0478178	0.271934	9.9e-07	7	174	s
849	170	54	7.9359	3.35362	1.49588	12.9234	461.86	634.089	29.4745	0.94958	-0.784641	0.0228766	4.18182	0.784464	10.701	0.471633	29.5437	832.789	1.29189	1.81031	4.18182	0.694832	0.212768	0.591743	0.0229637	10.1552	0.509811	11.3584	0.358972	28.8793	793.955	1.26272	1.83903	10.1552	0.844252	0.178516	0.550139	9.61e-07	13	243	s
850	170	54	7.9359	3.35362	1.49588	12.9234	461.86	634.089	29.4745	0.94958	-0.784641	0.0228766	4.18182	0.784464	10.701	0.471633	29.5437	832.789	1.29189	1.81031	4.18182	0.694832	0.212768	0.591743	0.0229637	10.1552	0.509811	11.3584	0.358972	28.8793	793.955	1.26272	1.83903	10.1552	0.844252	0.178516	0.550139	9.61e-07	13	243	s
851	76	28	4.55545	1.04021	2.48311	6.25255	506	629.616	13.5074	0.804048	-0.629621	0.0189505	7.73518	0.517225	9.01116	0.358011	25.7589	625.642	1.23681	1.87926	7.73518	0.797836	0.10654	0.436596	0.0196	14.9	0.0849802	9.1419	0.251591	25.18	595.604	1.13969	1.75304	14.9	0.89414	0.15602	0.506651	9.98e-07	5	111	s
852	69	27	4.27253	1.06731	2.12019	5.7907	623.07	631.273	12.8297	0.831379	1.48917	0.0539685	1.86404	0.42127	2.61045	0.556837	32.7412	1016.37	0.932518	1.3659	1.86404	0.535119	0.080163	0.328331	0.0660321	3	0.124251	2.71282	0.433142	32.9512	1033.58	0.861819	1.24556	3	0.588123	0.0819084	0.317672	1.03e-06	15	163	s
853	100	32	5.53285	1.59369	2.7677	8.08765	653.129	635.423	17.5619	0.887133	-0.793227	0.0144118	6.26176	0.62022	9.24394	0.378511	27.3265	704.384	1.29437	1.9251	6.26176	0.761982	0.144892	0.509621	0.0185714	15.2571	0.213715	10.702	0.282161	27.1429	694.521	1.23977	1.80306	15.2571	0.90586	0.188725	0.55966	1.02e-06	11	110	s
854	51	20	3.59988	0.195957	2.95846	3.85389	615.535	636.474	8.72873	0.303146	-1.04382	0.0194876	9.51205	0.477241	10.0979	0.34437	25.3554	607.987	1.24926	1.86204	9.51205	0.83119	0.153373	0.515795	0.0362718	18.7879	0.0775473	11.1837	0.236463	25.5152	617.372	1.11382	1.51386	18.7879	0.931373	0.155802	0.475073	1.04e-06	13	163	s
855	129	37	5.96881	0.996369	3.34131	7.71639	602.35	640.61	15.3079	0.580969	0.817692	0.0253521	3.8686	0.705021	7.5574	0.459646	28.6347	773.088	1.23535	1.73975	3.8686	0.669222	0.196052	0.561135	0.0409418	8.83158	0.32528	7.54463	0.374317	28.1789	748.502	1.13906	1.61559	8.83158	0.819363	0.122297	0.435639	1.04e-06	14	138	s
856	321	90	10.7745	4.74566	3.5778	20.6876	503.913	652.548	37.7155	0.878157	-1.00548	0.0161405	4.54635	0.706977	8.75765	0.442726	29.4323	818.462	1.29016	1.89313	4.54635	0.69787	0.164384	0.536252	0.0132936	10.3361	0.374748	9.26557	0.320434	29.2353	805.322	1.26037	1.97019	10.3361	0.859376	0.0947492	0.421844	1.03e-06	6	383	s
857	95	32	5.31392	1.64753	2.71875	7.92648	345.885	642.271	16.9732	0.895097	-0.470073	0.0515571	1.98131	0.591363	3.42429	0.57867	32.1869	978.908	1.02296	1.43226	1.98131	0.559842	0.14454	0.447215	0.040978	4.4697	0.123664	3.55022	0.408344	32.1061	975.632	0.962828	1.49271	4.4697	0.664715	0.0769033	0.335461	8.8e-07	8	179	s
858	154	41	6.70068	1.41221	4.46768	8.99101	268.025	646.707	18.7951	0.804886	-0.335542	0.0273691	3.76103	0.604253	5.75181	0.500787	29.364	809.01	1.19016	1.7307	3.76103	0.671901	0.145419	0.487542	0.0300941	6.60714	0.161795	4.94125	0.390323	28.4464	759.505	1.05397	1.66262	6.60714	0.76623	0.116826	0.431741	9.26e-07	8	172	s
859	144	38	6.41597	1.15406	4.41329	8.30683	671.224	647.726	17.6593	0.750921	-0.0711409	0.0245537	3.06312	0.752329	7.18384	0.472622	28.8107	782.518	1.22722	1.72244	3.06312	0.616816	0.221652	0.59083	0.0223197	8.07965	0.398005	7.71073	0.296124	28.5044	765.037	1.18642	1.75597	8.07965	0.787936	0.136133	0.475656	1.02e-06	9	181	s
860	211	50	7.93113	1.9466	4.30674	11.2102	407.308	653.237	22.983	0.817913	-0.198073	0.0255541	3.26755	0.764079	7.92509	0.500637	27.9828	739.716	1.238	1.7321	3.26755	0.647357	0.208174	0.575616	0.0318821	8.19512	0.393805	7.75948	0.396282	27.3293	703.199	1.16906	1.68685	8.19512	0.816035	0.11766	0.436038	9.17e-07	11	264	s
861	90	29	4.92953	0.740779	3.47592	6.10647	385.262	652.011	13.465	0.714655	-0.478564	0.0164617	5.39414	0.732314	11.0755	0.40725	28.3192	764.691	1.30473	1.86837	5.39414	0.726867	0.191673	0.571877	0.0195346	14.1356	0.212679	9.97702	0.265548	27.0847	691.137	1.21267	1.76315	14.1356	0.895543	0.12101	0.450731	8.97e-07	13	117	s
862	92	29	5.00714	0.801982	3.97091	6.51067	597.621	651.901	13.3875	0.7214	-0.244682	0.0290048	3.2	0.629404	5.31737	0.480422	29.4476	814.691	1.15237	1.64996	3.2	0.627076	0.159886	0.499283	0.0372008	7.17742	0.245051	5.75358	0.374877	28.6613	772.481	1.08151	1.55572	7.17742	0.78507	0.0785907	0.345689	1.05e-06	15	110	s
863	168	52	6.49131	2.04933	1.9975	9.44568	446.858	660.88	19.631	0.734179	-1.55496	0.0167656	5.24698	0.739133	11.0568	0.437505	28.5458	776.682	1.31156	1.88718	5.24698	0.728199	0.183728	0.563355	0.0240928	10.9268	0.419514	10.4118	0.340657	28.2764	758.301	1.22867	1.78874	10.9268	0.871328	0.137769	0.482221	9.73e-07	9	227	s
864	82	42	4.88314	1.76534	1.57071	8.20514	352.945	659.005	14.8747	0.803619	-0.38719	0.0486158	2.20472	0.378142	2.77269	0.533766	33.8346	1086.33	0.94929	1.40512	2.20472	0.567149	0.0772169	0.326681	0.0574197	4.54348	-0.183771	2.91907	0.42769	34.3261	1124.5	0.839295	1.33678	4.54348	0.690763	0.0640833	0.291029	8.86e-07	10	653	s
865	62	24	3.96867	0.396996	3.18334	4.64224	466.313	661.125	9.57854	0.425166	1.46916	0.040238	2.13171	0.541391	3.3241	0.500574	32.7659	1015.87	1.00571	1.43039	2.13171	0.533974	0.122963	0.413392	0.0969757	3.84615	-0.0212989	2.88297	0.457919	32.8205	1028.46	0.808386	1.0642	3.84615	0.627486	0.0234614	0.157948	1e-06	10	98	s
866	71	27	4.39952	1.11458	2.42557	6.19095	427.732	661.501	13.4473	0.830332	-0.374504	0.0237755	9.01277	0.433182	8.95031	0.360945	24.5787	567.849	1.2322	1.81236	9.01277	0.825336	0.117948	0.450786	0.0199185	22.4894	-0.156549	10.7226	0.190678	24.3617	555.321	1.14706	1.7521	22.4894	0.97167	0.152426	0.50106	9.49e-07	11	97	s
867	96	34	5.25084	1.54783	2.60722	7.66028	485.474	665.148	16.8294	0.873852	-1.47696	0.0298021	7.79321	0.441143	7.97245	0.444193	25.3673	604.543	1.19196	1.76805	7.79321	0.800396	0.136979	0.47848	0.0385387	13.597	0.0699053	8.30948	0.343662	25.0299	588.367	1.09815	1.54096	13.597	0.896743	0.115217	0.414385	1.03e-06	8	127	s
868	42	19	3.24335	0.573006	2.0634	4.0581	569.674	662.205	8.87505	0.722794	-0.600048	0.110336	1.28788	0.258525	1.86846	0.656061	35.6364	1217.87	0.769668	1.09312	1.28788	0.48475	0.0700032	0.276107	0.0896	3.24	-0.331799	2.2164	0.472706	35.88	1240.69	0.679698	1.14243	3.24	0.611974	0.164895	0.430818	1.07e-06	14	49	s
869	189	51	7.60765	2.29935	3.17671	11.6667	364.413	668.007	24.4462	0.884441	-0.0227489	0.0194353	3.2979	0.803426	9.38846	0.502795	29.4925	825.25	1.29688	1.80768	3.2979	0.642869	0.234852	0.617939	0.0167884	8.88235	0.520402	10.2602	0.349935	29.4967	825.508	1.25935	1.87344	8.88235	0.827315	0.139799	0.495394	8.99e-07	12	653	s
870	106	43	6.14241	2.05978	2.38313	9.43054	798.028	671.139	19.9739	0.919944	-0.635275	0.0211939	4.70349	0.530894	6.01324	0.421309	28.6686	771.181	1.17622	1.75074	4.70349	0.706183	0.0953553	0.400993	0.0238395	11.1594	-0.0131965	6.50704	0.287198	28.6377	771.09	1.06556	1.6942	11.1594	0.852831	0.107489	0.418408	1.14e-06	15	108552	c
871	357	85	11.2099	4.18749	4.44077	19.722	580.489	676.218	38.1238	0.929469	-0.446384	0.0227833	3.69867	0.682578	6.82611	0.50722	27.5753	713.229	1.23861	1.78235	3.69867	0.670323	0.175814	0.539223	0.0171872	8.96246	0.349122	7.8849	0.382366	27.5222	709.982	1.2276	1.89611	8.96246	0.825749	0.0818583	0.386548	1.08e-06	15	429	s
872	110	32	5.47327	0.65132	4.04588	6.66102	555.082	672.766	14.4313	0.632649	1.40991	0.0201509	5.40314	0.719948	10.6467	0.391199	25.4398	616.241	1.2932	1.84907	5.40314	0.724517	0.200013	0.58049	0.0186529	13.5301	0.377605	11.8694	0.293183	25.1687	602.426	1.24215	1.84241	13.5301	0.897164	0.193528	0.5711	1.09e-06	14	127	s
873	232	54	8.19568	1.03284	6.235	10.6591	741.153	677.856	18.9899	0.342636	0.49027	0.02553	2.77671	0.796013	7.8061	0.531666	28.2941	755.621	1.2539	1.72659	2.77671	0.606308	0.235148	0.607272	0.0249517	6.22527	0.523132	7.52725	0.410413	27.7637	726.305	1.18516	1.75268	6.22527	0.754634	0.146055	0.491228	1.07e-06	12	108552	l
874	97	30	5.2022	0.89966	3.80716	6.83333	649.873	676.208	14.0557	0.745614	-0.659409	0.034025	2.36637	0.679915	4.69647	0.525553	29.97	843.655	1.13881	1.5915	2.36637	0.580753	0.172992	0.510105	0.0326612	4.55072	0.231484	3.96072	0.420723	29.7971	836.77	0.996442	1.54587	4.55072	0.686795	0.110557	0.4068	1.03e-06	11	130	s
875	304	69	8.69571	2.53349	1.38654	11.444	538.384	683.305	22.5424	0.498041	-1.00039	0.0270111	2.29406	0.797259	6.65763	0.561848	30.2557	863.455	1.2192	1.67233	2.29406	0.57763	0.243134	0.608707	0.0231921	5.30435	0.575852	7.25295	0.422559	30.3557	870.008	1.19583	1.76133	5.30435	0.73144	0.131595	0.468746	1.11e-06	15	365	s
876	196	58	8.06309	3.3556	1.20443	13.4011	408.327	678.263	28.7188	0.945309	-0.111791	0.0533615	1.95614	0.522673	3.04906	0.617872	32.7778	1015.94	1.00199	1.42541	1.95614	0.549579	0.145387	0.447516	0.0528513	2.91304	0.283422	3.03261	0.535232	33	1032.38	0.950547	1.42605	2.91304	0.604351	0.13291	0.428656	9.51e-07	11	337	s
877	45	20	3.35283	0.637183	2.45	4.28981	317.21	679.412	9.59985	0.764109	-0.198406	0.0324221	4.74825	0.596365	6.88186	0.415945	30.2587	866.497	1.14314	1.60062	4.74825	0.70552	0.202271	0.549958	0.0576	12.12	0.0648725	7.4804	0.29694	29.72	836.716	1.03352	1.30751	12.12	0.72814	0.24266	0.550532	9.05e-07	13	83	s
878	58	24	3.91954	1.00521	2.04167	5.40078	387.936	679.927	11.8659	0.846884	0.315629	0.124194	0.984043	0.216375	1.62788	0.66117	36.2713	1266.88	0.699478	0.999916	0.984043	0.427864	0.0269288	0.164088	0.127424	1.42105	-0.155405	1.61496	0.605263	36.5263	1292.77	0.585721	0.959656	1.42105	0.475018	0.102235	0.313416	9.32e-07	11	337	s
879	409	74	11.5701	2.97635	5.73433	17.572	339.221	694.861	33.7975	0.845379	-0.996494	0.0318551	2.37691	0.817476	7.51122	0.59556	28.6768	776.254	1.24355	1.67514	2.37691	0.580129	0.281877	0.650268	0.0246822	4.74336	0.650294	7.78194	0.460711	28.3245	756.226	1.23497	1.80054	4.74336	0.711382	0.158605	0.516411	9.33e-07	14	443	s
880	204	60	8.17345	3.28752	0.661018	13.0692	492.196	689.784	29.4775	0.91779	-1.04547	0.0221315	3.50423	0.774171	8.75857	0.485112	29.8254	843.347	1.26285	1.79086	3.50423	0.651609	0.201	0.574284	0.0202462	7.35374	0.496755	8.30632	0.329223	29.3946	816.669	1.20241	1.79242	7.35374	0.772033	0.140015	0.486325	1.09e-06	6	520	s
881	134	37	6.15914	1.0471	4.38621	8.24922	359.523	688.314	16.218	0.667605	-1.20225	0.026263	4.54894	0.700106	8.58425	0.462451	26.1702	647.33	1.23947	1.78593	4.54894	0.707643	0.187079	0.555238	0.0348558	9.75	0.282642	7.79577	0.367088	25.9038	630.601	1.14162	1.65433	9.75	0.822524	0.11075	0.419889	9.27e-07	14	200	s
882	49	25	3.53379	0.745354	2.01911	5.16496	275.385	691.858	9.513	0.566839	-0.254538	0.0283979	6.19868	0.519112	7.44502	0.375934	27.8543	730.628	1.18884	1.66324	6.19868	0.748548	0.163836	0.506772	0.0275482	17.0303	-0.0256609	9.30211	0.225244	28.0606	744.598	1.07135	1.5846	17.0303	0.914275	0.213873	0.561949	9.27e-07	12	257	s
883	79	28	4.65024	1.0334	2.44662	6.4076	600.812	693.491	13.3172	0.7599	-1.05979	0.0272899	5.06439	0.500481	6.06927	0.431666	27.9432	732.119	1.16808	1.70603	5.06439	0.716157	0.111048	0.426324	0.0327503	9.85185	0.0716732	6.30624	0.284436	28.1852	746.706	1.06817	1.56098	9.85185	0.807027	0.119558	0.424306	1.08e-06	12	1021	s
884	129	36	5.99187	1.15246	3.91824	7.96293	612.084	695.029	17.372	0.777304	1.48616	0.0230319	5.60177	0.712407	10.7391	0.428397	24.7522	583.247	1.30242	1.85658	5.60177	0.749439	0.197148	0.577687	0.0219727	11.4375	0.393928	10.4358	0.335374	24.5833	571.972	1.22384	1.73995	11.4375	0.866	0.1345	0.47106	1.06e-06	14	152	s
885	130	35	5.99348	0.764433	4.6638	8.1876	304.148	695.366	13.7522	0.164888	0.726246	0.025604	4.54167	0.682686	8.15641	0.459279	26.3882	657.201	1.22634	1.76431	4.54167	0.712009	0.168269	0.526173	0.027426	12.6636	0.273333	9.71345	0.297445	26.4393	659.01	1.20396	1.72147	12.6636	0.888681	0.102324	0.411622	9.3e-07	12	437	s
886	409	82	11.7851	3.76838	4.62583	18.2659	251.728	702.719	35.9983	0.892604	-0.535905	0.0215716	3.2106	0.769421	7.96204	0.5284	28.6834	775.23	1.28649	1.8054	3.2106	0.63371	0.217229	0.596612	0.0181217	7.29446	0.438113	7.49104	0.37991	28.5773	767.11	1.21963	1.85931	7.29446	0.782785	0.101369	0.42435	9.41e-07	11	1057	s
887	304	79	10.0768	3.32142	3.61735	16.7274	560.312	702.504	31.4782	0.881347	-0.982487	0.0355043	2.29368	0.681398	4.5996	0.560648	29.4833	815.659	1.13623	1.58701	2.29368	0.577969	0.186678	0.527961	0.0317701	5.1102	0.352921	4.94867	0.449565	29.3796	810.075	1.1061	1.63782	5.1102	0.711499	0.117403	0.429841	1.13e-06	18	1021	s
888	89	31	4.89262	0.665694	3.465	6.52092	292.743	697.738	12.3645	0.561154	0.579937	0.0233827	5.46844	0.658548	9.00763	0.431612	27.2292	701.82	1.24351	1.78492	5.46844	0.728227	0.167036	0.526974	0.024187	11.0164	0.32967	9.21715	0.258336	26.9836	688.027	1.17324	1.68946	11.0164	0.833129	0.160168	0.504817	9.35e-07	13	437	s
889	72	26	4.35508	0.756113	2.94827	5.71772	589.461	696.857	11.7099	0.694664	-0.208789	0.0277974	2.75519	0.686266	5.39095	0.471516	32.3817	989.378	1.16365	1.62344	2.75519	0.591421	0.177487	0.52066	0.0632086	5.80952	0.285655	5.06633	0.389356	31.8571	963.098	0.99224	1.27177	5.80952	0.653386	0.109114	0.369476	1.09e-06	15	1021	s
890	289	68	9.91737	3.85711	3.51311	16.0794	652.398	700.67	34.2666	0.936703	-0.222425	0.0553181	1.56882	0.804237	5.00694	0.621226	32.6198	1007.17	1.11251	1.48415	1.56882	0.517245	0.246868	0.584487	0.0465406	3.83913	0.546955	5.23703	0.51475	32.4565	997.813	1.07652	1.56744	3.83913	0.679584	0.160455	0.489124	1.02e-06	10	961	s
891	162	55	6.68136	1.72395	2.90551	9.70221	574.313	704.174	17.7089	0.57303	-0.843705	0.0155922	5.1413	0.738359	10.8251	0.431178	26.587	672.118	1.32911	1.89933	5.1413	0.721666	0.195106	0.580316	0.022562	12.2017	0.397443	11.1249	0.328827	26.0672	644.799	1.2378	1.74664	12.2017	0.885866	0.169145	0.525195	1.12e-06	17	1021	s
892	165	38	6.84168	0.543435	5.75841	7.92739	314.359	704.476	15.5227	0.354746	1.29442	0.0213014	3.27458	0.757846	7.76134	0.492218	28.3932	759.974	1.26016	1.76625	3.27458	0.638297	0.20378	0.574622	0.0214823	8.2782	0.403241	7.93596	0.359902	28.5489	767.179	1.20453	1.73832	8.2782	0.799891	0.104823	0.418254	9.5e-07	14	437	s
893	80	28	4.5656	0.4542	3.67701	5.21869	368.656	703.324	10.9644	0.484892	-0.00828651	0.0548876	1.79336	0.568672	3.07888	0.588843	31.9041	963.122	0.975107	1.35643	1.79336	0.540296	0.133301	0.419661	0.0484056	3.40678	0.260868	3.30458	0.451147	32.322	989.748	0.954275	1.42393	3.40678	0.626936	0.0662888	0.30498	9.66e-07	12	126	s
894	138	42	6.51426	1.97325	3.05959	9.86717	187.344	704.814	21.2889	0.89346	-0.175453	0.0295469	5.3431	0.601054	7.69651	0.461244	25.6569	619.049	1.21093	1.71714	5.3431	0.734941	0.166886	0.518168	0.0313884	11.233	0.175062	7.80839	0.354346	25.3107	602.015	1.10295	1.64193	11.233	0.842503	0.0965181	0.391646	9.59e-07	8	159	s
895	190	53	7.70663	2.48093	3.37862	12.722	545.787	709.416	23.6467	0.836739	0.856823	0.0237491	3.02421	0.752197	7.10205	0.528424	27.1301	691.39	1.24563	1.74541	3.02421	0.634225	0.227644	0.601106	0.0187926	6.26718	0.505336	7.33479	0.369257	26.4504	656.391	1.20521	1.78336	6.26718	0.753804	0.146636	0.495856	1.15e-06	17	1021	s
896	158	45	6.97964	2.22614	2.05372	10.4284	473.628	711.344	22.4053	0.892051	-0.90202	0.0341676	2.15761	0.766119	5.61263	0.569551	30.2989	865.864	1.15151	1.57428	2.15761	0.572769	0.230482	0.580017	0.0248588	4.67241	0.502744	5.6982	0.45475	29.9828	845.761	1.14458	1.66476	4.67241	0.711883	0.107635	0.415363	1.13e-06	10	520	s
897	151	49	7.04877	2.7208	2.92663	11.3486	631.458	713.152	24.8238	0.935931	0.0038638	0.0432554	1.6938	0.664308	3.52285	0.589216	32.7636	1014.74	1.04069	1.44763	1.6938	0.524008	0.174429	0.491598	0.0344874	3.9434	0.327015	3.92978	0.434525	32.8113	1019.22	1.00815	1.52144	3.9434	0.662089	0.105204	0.394269	1.04e-06	13	961	s
898	268	61	8.93196	2.06992	5.11517	12.9843	230.989	721.154	25.1822	0.798992	-1.33507	0.0318162	2.27979	0.765524	5.86146	0.548385	30.1057	854.22	1.17382	1.59983	2.27979	0.581072	0.226552	0.579238	0.0276553	4.92754	0.441056	5.4079	0.408912	29.5072	818.72	1.11682	1.65627	4.92754	0.708188	0.0991977	0.398441	9.57e-07	9	1057	s
899	85	29	4.73341	0.619981	3.31196	5.62354	305.096	716.094	12.103	0.636724	1.30596	0.0326325	2.46021	0.574222	3.88907	0.513262	31.3391	925.326	1.06981	1.56353	2.46021	0.582137	0.121197	0.427406	0.0323077	5.32308	0.160758	4.17136	0.361195	31.2615	921.467	1.02737	1.58147	5.32308	0.697007	0.0862427	0.364478	9.76e-07	14	320	s
900	127	39	6.02531	1.6536	2.91542	8.69348	599.603	717.553	18.8753	0.853304	0.384434	0.0238171	5.22727	0.739428	11.0304	0.457599	25.8182	636.869	1.28301	1.82923	5.22727	0.719492	0.199135	0.576817	0.0283499	10.8511	0.402654	10.0827	0.327819	25.3404	607.642	1.21238	1.68938	10.8511	0.862853	0.137302	0.469533	1.09e-06	16	199	s
901	62	29	4.1616	1.13363	1.93411	5.93204	248.094	720.038	12.4941	0.758617	-1.5498	0.0238715	9.66146	0.492632	10.5212	0.352499	25.2865	606.604	1.24107	1.80582	9.66146	0.84625	0.151479	0.506146	0.0457064	22.4211	0.0100899	12.3248	0.292123	25.7368	629.933	1.09837	1.4815	22.4211	0.918232	0.194967	0.523338	9.64e-07	13	1057	s
902	615	101	14.7071	5.52947	2.36652	23.3994	405.926	731.639	48.6041	0.904763	-0.883682	0.0414381	1.10167	0.854677	4.79041	0.65821	30.5714	879.039	1.1609	1.48416	1.10167	0.45544	0.324975	0.661661	0.0271474	2.70857	0.639818	4.76	0.506568	30.4	868.605	1.13785	1.64105	2.70857	0.603823	0.152144	0.486619	1.1e-06	9	1582	s
903	150	46	6.48644	2.34909	0.856698	9.79769	453.54	721.101	21.6302	0.873967	-0.811508	0.0223585	3.03661	0.78362	8.01683	0.501589	29.2486	809.157	1.2463	1.74007	3.03661	0.630906	0.216586	0.587102	0.0226446	6.68182	0.540911	8.27725	0.363323	28.9909	794.199	1.21013	1.75108	6.68182	0.758535	0.166537	0.521992	1.14e-06	13	1582	s
904	174	44	7.04116	1.25618	4.4801	9.28481	348.332	721.552	18.5417	0.692716	0.0657464	0.0252218	2.57512	0.753823	6.23022	0.501164	28.3813	756.559	1.21117	1.68579	2.57512	0.590202	0.207182	0.568059	0.0279586	5.61538	0.379544	5.52521	0.352049	27.6615	716.567	1.12701	1.67258	5.61538	0.721184	0.103762	0.408988	1e-06	10	218	s
905	212	58	8.74086	3.77969	2.48808	14.5975	314.901	730.846	32.2062	0.956452	-1.11027	0.0392802	2.41263	0.678345	4.75035	0.560051	30.3535	866.362	1.1341	1.58372	2.41263	0.594708	0.174934	0.511707	0.029207	5.08589	0.316223	4.71897	0.441681	30.3252	864.877	1.08329	1.62582	5.08589	0.708428	0.0901262	0.377162	1.02e-06	14	284	s
906	157	38	6.62463	0.467104	5.82204	7.58123	369.079	725.134	15.9273	0.521367	-0.402924	0.0452041	2.60714	0.683409	5.11752	0.523038	27.875	730.622	1.10263	1.54184	2.60714	0.599353	0.182731	0.516339	0.045068	6.27778	0.263727	5.26321	0.412148	27.8968	731.562	1.04935	1.53922	6.27778	0.765337	0.0744186	0.334916	1.03e-06	10	211	s
907	107	32	5.41599	0.74548	3.60365	6.89103	634.436	723.574	13.6296	0.588717	-0.189966	0.0269869	3.37027	0.676471	6.20861	0.51867	28.6351	770.512	1.19341	1.67501	3.37027	0.629044	0.201516	0.559428	0.0252082	6.5122	0.438356	6.79744	0.341525	29.0732	797.671	1.12691	1.67267	6.5122	0.732885	0.188996	0.542854	1.04e-06	12	961	s
908	256	62	9.20255	2.91575	4.01872	14.1258	565.898	730.281	28.1938	0.888538	-0.683254	0.0199214	3.32456	0.754175	7.76206	0.492397	27.9978	738.232	1.26752	1.79961	3.32456	0.635633	0.211175	0.588357	0.0204203	7.76119	0.37988	7.25782	0.372197	28.0597	740.387	1.16886	1.78555	7.76119	0.80814	0.115023	0.442497	1.15e-06	16	2109	s
909	157	38	6.67909	0.719163	5.44629	8.04454	589.441	727.76	16.8469	0.611489	-0.366185	0.0261264	4.31485	0.695713	8.0901	0.492964	24.8229	579.094	1.26344	1.76935	4.31485	0.69243	0.208352	0.580825	0.0273628	6.99153	0.369011	6.54013	0.38366	24.161	544.343	1.15724	1.68701	6.99153	0.764851	0.145421	0.482141	1.11e-06	19	195	s
910	148	41	6.51577	1.7881	3.54499	9.77084	215.262	729.4	19.7901	0.869548	0.0105917	0.0461685	1.52987	0.70427	3.58659	0.612626	33.2023	1043.69	1.03283	1.40815	1.52987	0.510702	0.196495	0.514035	0.0402521	2.85185	0.425055	3.48011	0.499212	32.9259	1026.97	0.990103	1.45277	2.85185	0.616835	0.100873	0.378166	9.57e-07	10	1057	s
911	106	35	5.42136	1.39559	2.66267	7.3604	296.521	729.771	16.5082	0.832854	-0.0547926	0.0246378	3.80716	0.617973	5.98285	0.477059	28.7658	776.3	1.19455	1.71472	3.80716	0.657087	0.162468	0.511432	0.0348288	7.55844	0.208988	5.7777	0.35452	28.6494	772.644	1.06147	1.58613	7.55844	0.730253	0.132855	0.449507	1.01e-06	14	320	s
912	237	49	8.41916	1.52692	6.14042	11.0662	145.297	735.717	23.1252	0.784738	-0.704402	0.0238352	2.4593	0.819082	7.79673	0.564151	27.7081	723.344	1.27679	1.72362	2.4593	0.590744	0.278013	0.653313	0.02005	6.10553	0.58488	8.35394	0.422012	27.6231	719.167	1.24402	1.7757	6.10553	0.750951	0.158541	0.51326	9.13e-07	10	279	s
913	196	49	7.52499	1.49946	4.65149	10.7752	881.763	737.556	20.5127	0.762072	-1.20842	0.0298225	2.10935	0.796238	6.17602	0.556905	27.2978	699.107	1.21121	1.63724	2.10935	0.55501	0.247807	0.608827	0.0251375	5.44025	0.486051	6.2926	0.375297	27.0755	686.528	1.17571	1.72473	5.44025	0.721468	0.109832	0.426178	1.14e-06	15	108552	c
914	50	22	3.55173	0.832525	2.23838	4.6526	274.472	730.209	10.4551	0.803984	-0.0489268	0.0700586	1.50625	0.36285	2.18202	0.576875	33.4438	1065.28	0.854442	1.22717	1.50625	0.488986	0.0746677	0.301321	0.0905612	1.42857	0.207921	1.90179	0.585714	33.5	1074.95	0.746882	1.09484	1.42857	0.473075	0.0659404	0.26821	1e-06	15	77	s
915	372	90	13.1685	6.06135	4.40915	23.4477	424.538	741.586	49.2056	0.975464	-0.58754	0.0192692	3.24284	0.741523	7.27297	0.493556	28.8492	783.021	1.25983	1.79627	3.24284	0.63656	0.183548	0.551748	0.0159062	7.77509	0.371825	7.18863	0.353486	28.7439	775.195	1.20823	1.88579	7.77509	0.7984	0.077607	0.375811	1.16e-06	11	1582	s
916	123	31	5.9016	0.611552	4.7271	6.89485	574.043	738.777	14.446	0.587875	-0.8489	0.0565201	2.55556	0.671873	4.89416	0.559462	27.3565	703.692	1.07587	1.5012	2.55556	0.59179	0.179632	0.506376	0.0361023	6.58511	0.232957	5.29252	0.400222	26.9894	683.555	1.04769	1.57753	6.58511	0.770757	0.0842664	0.359973	1.14e-06	16	2109	s
917	338	68	10.0673	1.9533	6.87457	13.905	253.268	747.19	26.6789	0.747515	0.804046	0.0293359	2.02109	0.784861	5.69717	0.57865	31.2393	920.188	1.1823	1.615	2.02109	0.561568	0.231927	0.587688	0.0193507	5.55755	0.45267	6.07697	0.391244	31.1259	912.86	1.15743	1.77566	5.55755	0.727412	0.0811924	0.373531	1.03e-06	12	608	s
918	116	32	5.68014	0.650022	4.46875	6.97547	208.143	744.459	14.6829	0.63561	1.02987	0.0286877	5.56049	0.601775	7.98159	0.457791	24.2321	552.85	1.19986	1.73821	5.56049	0.72838	0.152135	0.498897	0.0310477	8.37931	0.292916	6.92525	0.368595	24.0115	539.45	1.11766	1.64811	8.37931	0.811921	0.124243	0.442877	9.67e-07	10	136	s
919	210	51	7.91146	1.74391	5.15779	11.1133	609.067	744.542	21.8672	0.721704	0.00481164	0.0195831	3.25733	0.803136	9.27304	0.487347	26.684	674.469	1.29435	1.81513	3.25733	0.638588	0.235834	0.620068	0.0163149	9.14118	0.518633	10.495	0.329495	26.2588	653.335	1.2689	1.89562	9.14118	0.824263	0.139288	0.497076	1.07e-06	15	261	s
920	159	46	6.92995	2.23	3.39479	10.6792	274.517	746.429	22.5909	0.900644	0.106999	0.0318501	2.04676	0.755604	5.18738	0.566521	29.4784	816.849	1.15624	1.59745	2.04676	0.559605	0.216169	0.566588	0.0264583	4.65	0.47947	5.4666	0.414611	29.3167	807.653	1.13091	1.67025	4.65	0.683849	0.131504	0.457724	1.05e-06	13	608	s
921	115	35	5.62411	1.05847	3.75201	7.46939	589.442	749.475	15.2044	0.739375	0.076562	0.0531268	2.44724	0.554967	3.7495	0.587219	29.8693	839.901	1.03619	1.44432	2.44724	0.585102	0.15194	0.459779	0.0414107	6.13043	0.104638	4.42344	0.42263	30.0435	849.79	1.02233	1.53042	6.13043	0.751329	0.0585211	0.296873	1.11e-06	13	156	s
922	143	45	6.58585	1.97626	3.64675	9.71419	562.054	750.772	21.3509	0.893185	-0.0735806	0.0356535	2.54545	0.779706	6.77741	0.559027	29.7131	834.717	1.17977	1.60262	2.54545	0.601073	0.232547	0.586585	0.023885	6.39216	0.450544	6.8168	0.388633	29.2157	803.995	1.16002	1.69868	6.39216	0.758844	0.151262	0.492624	1.17e-06	17	2109	s
923	254	58	8.62457	2.09154	3.96331	12.0223	158.744	757.234	22.7483	0.6685	-0.0639877	0.0296897	2.60546	0.7022	5.37452	0.541626	28.5661	764.575	1.18578	1.65951	2.60546	0.598314	0.191187	0.543952	0.0247679	4.24242	0.489152	5.15233	0.416142	28.3434	752.488	1.13826	1.70404	4.24242	0.676894	0.112026	0.427887	9.07e-07	9	287	s
924	173	44	7.01425	0.91906	5.20936	8.94687	180.631	758.161	16.8886	0.478658	1.12475	0.0282311	3.19544	0.702197	6.36503	0.51247	27.8632	729.384	1.19636	1.69612	3.19544	0.641004	0.178449	0.531736	0.0339141	6.35878	0.347446	5.87222	0.43522	27.1221	690.294	1.09976	1.63621	6.35878	0.755137	0.0940907	0.386236	9.4e-07	10	460	s
925	374	76	10.6799	2.42305	6.92467	15.4171	224.781	763.116	28.6722	0.738462	0.360747	0.0469488	1.62683	0.624295	3.16504	0.608412	32.7353	1012.97	1.01879	1.4155	1.62683	0.522224	0.148418	0.450578	0.0364123	3.41503	0.292033	3.41186	0.471648	32.7092	1012	0.995294	1.51321	3.41503	0.643143	0.0404994	0.246241	1.03e-06	13	512	s
926	199	49	7.58176	1.51064	4.08209	10.0005	624.118	758.955	20.8111	0.753593	-1.29741	0.029162	2.74157	0.710876	5.74118	0.535002	27.2022	691.873	1.20899	1.65701	2.74157	0.611033	0.220576	0.580417	0.0217556	4.78667	0.448964	5.34333	0.394461	26.6	660.604	1.14382	1.73426	4.78667	0.697293	0.10621	0.420447	1.03e-06	12	435	s
927	170	44	7.07954	1.82597	2.70111	10.2857	540.711	766.796	20.7458	0.820315	-1.29623	0.0214032	4.20033	0.67776	7.5174	0.450106	25.4891	609.479	1.24848	1.80693	4.20033	0.684458	0.168702	0.532136	0.021952	11.28	0.236021	8.3824	0.333142	25.12	590.62	1.19573	1.76515	11.28	0.868516	0.0884983	0.388313	1.23e-06	15	2109	l
928	141	46	6.46305	1.80545	2.48293	9.79084	528.989	767.762	19.8429	0.825525	-1.24477	0.0213021	4.55809	0.658348	7.67067	0.45148	26.1639	642.944	1.24764	1.79293	4.55809	0.698712	0.169864	0.532073	0.0197	9.57	0.375683	8.66437	0.323847	25.55	613.933	1.20158	1.79029	9.57	0.829315	0.140934	0.487564	1.26e-06	13	2109	l
929	259	67	7.94316	2.67293	0.691417	11.762	117.62	770.607	22.5268	0.631812	-0.516026	0.0188187	4.23094	0.718594	8.51749	0.487011	27.6449	720.758	1.28357	1.83898	4.23094	0.694896	0.183041	0.556439	0.0165683	8.2132	0.47239	8.7834	0.366407	27.401	706.604	1.25367	1.8705	8.2132	0.800073	0.132533	0.482882	8.25e-07	8	322	s
930	152	47	6.78132	1.92152	3.87328	10.6443	609.533	767.345	20.5483	0.842504	0.448556	0.0296181	3.37333	0.584409	5.05848	0.49445	28.9352	784.907	1.14951	1.6567	3.37333	0.642483	0.134132	0.460377	0.021966	8.84348	0.0978792	5.90149	0.350744	28.9478	785.796	1.10841	1.74619	8.84348	0.821579	0.0677153	0.339403	1.05e-06	11	435	s
931	202	51	7.86696	2.10164	4.21573	12.1916	183.557	775.224	22.846	0.848084	1.17834	0.0783579	0.984701	0.635183	2.34958	0.680831	33.6078	1072.77	0.922073	1.21522	0.984701	0.434283	0.179894	0.462107	0.0698731	1.88514	0.297988	2.34267	0.581598	33.4122	1062.86	0.864088	1.29282	1.88514	0.542482	0.0609366	0.27936	9.59e-07	11	460	s
932	152	45	6.86775	2.32207	2.84757	10.9918	197.954	775.905	22.593	0.909788	1.09614	0.0461863	1.65909	0.659083	3.43328	0.613163	33.2917	1048.83	1.03095	1.42125	1.65909	0.523937	0.184757	0.501219	0.0392637	2.73529	0.454634	3.50776	0.498789	32.8333	1019.36	1.02035	1.49195	2.73529	0.590592	0.0984636	0.378371	9.93e-07	10	235	s
933	332	70	9.91982	2.3285	4.87453	13.4872	512.003	780.757	27.5134	0.744828	1.20018	0.0263243	3.90879	0.652065	6.61713	0.490565	25.4163	604.395	1.21222	1.74274	3.90879	0.67897	0.160423	0.511964	0.0202843	8.80364	0.275002	7.07149	0.364268	25.3636	600.56	1.17525	1.80898	8.80364	0.819392	0.0776107	0.368644	1.31e-06	13	4309	l
934	117	32	5.72878	0.689949	4.24471	6.83411	551.789	775.028	14.6723	0.6407	0.793452	0.0235066	3.94363	0.641124	6.49441	0.440569	27.1495	690.964	1.20862	1.75767	3.94363	0.663704	0.159556	0.512543	0.0229066	8.76471	0.279583	7.08308	0.278336	26.5059	657.417	1.17113	1.7119	8.76471	0.795472	0.140916	0.478097	1.2e-06	15	2109	l
935	69	25	4.26733	0.851074	2.60492	5.49414	589.012	772.769	11.9413	0.739685	0.417041	0.0301482	2.44978	0.66954	4.70663	0.498396	32.1092	972.835	1.1179	1.57757	2.44978	0.570622	0.165618	0.497878	0.0347222	5.97917	0.252097	4.99729	0.342656	32.2292	981.213	1.06504	1.50888	5.97917	0.701521	0.109016	0.399601	1.1e-06	16	106	s
936	184	50	8.00406	2.74682	3.71618	12.7047	147.215	780.361	26.4668	0.933945	0.452051	0.0727087	1.53096	0.560996	2.74367	0.606146	32.0232	971.686	0.938778	1.29743	1.53096	0.500789	0.124975	0.398527	0.0763532	2.1811	0.179795	2.32961	0.539185	31.6614	952.81	0.844655	1.2562	2.1811	0.562388	0.0382229	0.218569	8.81e-07	10	215	s
937	121	41	5.80814	1.29253	2.66133	8.3072	533.67	782.193	15.9173	0.667073	-0.632961	0.0252082	6.23171	0.630618	9.4353	0.436341	24.9	587.404	1.23791	1.80432	6.23171	0.767314	0.165346	0.52691	0.0261996	14.6596	0.238217	10.6219	0.34344	24.9574	590.306	1.15665	1.67698	14.6596	0.885294	0.138374	0.469738	1.26e-06	12	2109	l
938	65	24	4.10661	0.573105	2.91815	4.875	495.99	780.416	10.6409	0.630527	-1.53484	0.036962	2.06481	0.622484	3.73474	0.532298	31.9259	961.665	1.05862	1.50171	2.06481	0.543659	0.148553	0.462758	0.0465501	3.93478	0.144955	3.30092	0.40601	31.7609	956.321	0.921731	1.41074	3.93478	0.639684	0.0666627	0.304474	1.33e-06	14	4309	l
939	95	31	5.0419	0.610874	3.77764	6.13658	484.892	780.898	12.717	0.606523	0.356469	0.024681	3.77914	0.780059	9.59126	0.470601	27.9448	743.077	1.25226	1.75764	3.77914	0.668414	0.217143	0.590155	0.0288108	8.19697	0.57833	10.7196	0.374147	27.6515	732.443	1.16073	1.63369	8.19697	0.806087	0.230848	0.589159	1.35e-06	18	4309	l
940	116	32	5.67341	0.739423	4.40348	6.92031	472.466	786.318	14.6594	0.650674	-0.434495	0.0248041	3.82716	0.700183	7.3825	0.448075	26.6963	670.285	1.22902	1.72826	3.82716	0.667527	0.191994	0.55428	0.04	10.0556	0.267177	7.86083	0.343195	26.7	670.879	1.13652	1.61411	10.0556	0.833322	0.163864	0.500314	1.36e-06	20	4309	l
941	332	65	9.78569	1.99119	5.22701	13.7549	554.314	791.796	25.1786	0.640576	-1.14547	0.0266208	3.69802	0.669223	6.58989	0.492283	25.6799	616.555	1.22801	1.75945	3.69802	0.66351	0.162704	0.517437	0.0250166	7.28159	0.377873	6.85217	0.394451	25.5126	607.394	1.19666	1.79798	7.28159	0.777152	0.0945865	0.404329	1.19e-06	13	2109	l
942	131	41	6.17084	1.90319	2.39024	9.312	128.142	786.781	18.6917	0.832049	-0.0064989	0.0678469	1.16	0.589571	2.41316	0.630353	34.6933	1144.63	0.927438	1.26146	1.16	0.447551	0.149218	0.429017	0.0702422	1.55294	0.2827	2.08249	0.562353	34.3059	1123.63	0.826758	1.20882	1.55294	0.483028	0.0597128	0.267774	8.34e-07	5	167	s
943	131	41	6.17084	1.90319	2.39024	9.312	128.142	786.781	18.6917	0.832049	-0.0064989	0.0678469	1.16	0.589571	2.41316	0.630353	34.6933	1144.63	0.927438	1.26146	1.16	0.447551	0.149218	0.429017	0.0702422	1.55294	0.2827	2.08249	0.562353	34.3059	1123.63	0.826758	1.20882	1.55294	0.483028	0.0597128	0.267774	8.34e-07	5	167	s
944	104	33	5.29854	0.768329	3.98125	6.85579	608.817	786.624	13.5288	0.618265	-0.370092	0.0278627	2.75978	0.725368	6.02451	0.513816	29.9497	844.544	1.18854	1.65811	2.75978	0.598332	0.197538	0.552011	0.0340571	5.58537	0.480366	6.37433	0.344817	30.122	858.413	1.09608	1.54481	5.58537	0.703725	0.193433	0.530716	1.03e-06	11	161	s
945	200	51	7.68115	2.11716	3.96898	10.788	485.831	796.27	23.0344	0.849937	1.4379	0.0452093	2.69155	0.643404	4.77394	0.548657	27.0014	682.896	1.10755	1.5706	2.69155	0.615679	0.151853	0.476949	0.0304965	6.61491	0.215868	5.21798	0.379677	26.9379	679.045	1.07695	1.67907	6.61491	0.765923	0.077025	0.354762	1.36e-06	19	4309	l
946	565	93	13.8998	3.71828	6.2193	21.4977	75.6952	798.624	40.8467	0.875934	-0.429882	0.0308646	2.02792	0.820153	6.63791	0.597743	29.8084	836.831	1.23729	1.6723	2.02792	0.561679	0.273706	0.641534	0.0208265	5.60581	0.534191	7.01728	0.422875	29.6888	829.144	1.21634	1.8352	5.60581	0.741661	0.122333	0.461181	6.71e-07	9	1125	s
947	87	29	4.89917	0.894189	3.08924	6.40786	455.764	796.66	13.7499	0.746698	-0.520427	0.0301523	4.79661	0.590327	6.85419	0.452076	25.1017	590.369	1.19042	1.70615	4.79661	0.721671	0.160855	0.507966	0.0253254	12.9077	0.117764	8.31533	0.305659	25.2154	596.3	1.13332	1.66937	12.9077	0.874937	0.171001	0.517814	1.37e-06	24	1521	l
948	109	36	5.64783	1.16904	3.81325	7.97474	472.248	799.547	15.9926	0.787843	-1.31221	0.0228196	4.34865	0.724668	8.89711	0.464371	27.3216	706.761	1.254	1.77369	4.34865	0.698731	0.187846	0.554696	0.0193568	11.321	0.305787	9.15383	0.302972	27.1975	696.981	1.20355	1.79783	11.321	0.844564	0.113074	0.440269	1.38e-06	20	4309	l
949	282	57	9.42313	2.35494	4.94631	13.4409	647.629	804.195	28.0207	0.867706	-1.00617	0.038956	1.45667	0.81549	4.9474	0.622095	30.6894	887.636	1.13768	1.5057	1.45667	0.50532	0.273298	0.615737	0.0371094	3.475	0.591295	5.25123	0.467771	30.6417	885.553	1.11164	1.556	3.475	0.652374	0.133615	0.446897	9.53e-07	9	432	s
950	105	30	5.34886	0.363168	4.44872	5.99926	683.546	798.307	12.0336	0.298522	-0.480325	0.0955387	0.793956	0.626089	2.06169	0.688736	34.1071	1108.73	0.861403	1.11694	0.793956	0.38713	0.186923	0.453553	0.0825831	1.40789	0.307296	2.01623	0.564474	33.8816	1096.68	0.80557	1.1486	1.40789	0.446738	0.0850916	0.311516	9.73e-07	10	108552	s
951	261	60	9.06088	2.17419	5.4626	13.3282	604.455	801.968	25.8799	0.809878	-0.628875	0.0381406	3.15745	0.718519	6.60862	0.529003	25.0617	589.204	1.18855	1.65416	3.15745	0.642215	0.204601	0.560438	0.0276817	8.47964	0.352297	7.54593	0.390925	24.8959	580.5	1.17262	1.73633	8.47964	0.796096	0.104234	0.416911	1.02e-06	11	323	s
952	216	57	8.34922	2.89903	3.03636	13.2642	584.796	807.836	27.4599	0.915873	-1.45492	0.0475189	1.50783	0.668195	3.27217	0.600776	31.8551	956.79	1.04585	1.43315	1.50783	0.503444	0.177169	0.493101	0.0436496	3.71341	0.244345	3.45708	0.479271	31.4695	935.386	0.98556	1.48777	3.71341	0.664184	0.0677112	0.314669	1.07e-06	12	310	s
953	100	32	5.18698	0.866344	3.35425	6.57179	877.031	800.733	13.4048	0.596846	0.308178	0.023892	3.86842	0.630756	6.2383	0.477558	26.9971	683.401	1.18398	1.71551	3.86842	0.661412	0.162007	0.510856	0.0250173	7.46053	0.27862	6.17101	0.354045	27.0132	683.978	1.11422	1.67238	7.46053	0.789658	0.101586	0.404818	1.15e-06	18	108552	c
954	147	47	6.37963	1.22604	3.20395	7.93788	533.319	801.509	16.1416	0.505888	0.172093	0.0232916	3.61265	0.690288	6.83227	0.470587	25.3913	603.563	1.22839	1.74352	3.61265	0.659663	0.190019	0.553674	0.0201582	8.20183	0.244394	6.42732	0.300271	24.7523	570.598	1.14952	1.76229	8.20183	0.78643	0.099655	0.410798	1.25e-06	13	4309	l
955	155	42	6.89617	1.96094	3.37743	10.1923	117.754	802.916	21.7691	0.883157	-0.428593	0.029713	4.72294	0.690391	8.62725	0.474323	25.9083	634.016	1.24594	1.76993	4.72294	0.714248	0.179079	0.542209	0.0263574	7.65254	0.477598	8.32439	0.377628	25.6695	620.568	1.19659	1.77213	7.65254	0.783513	0.135553	0.476613	7.98e-07	6	226	s
956	154	55	6.83638	2.33147	1.62674	11.4935	36.9171	808.412	21.1485	0.863628	-0.833174	0.0488105	1.89168	0.550882	3.106	0.576539	33.6248	1071.68	0.988132	1.41156	1.89168	0.547758	0.118981	0.404395	0.0519976	2.69444	0.225368	2.73918	0.48219	33.8426	1089.31	0.902458	1.38233	2.69444	0.590901	0.0470365	0.253806	5.03e-07	7	1125	s
957	138	45	7.28975	3.09637	2.36288	12.0381	618.897	809.814	27.2413	0.964611	-0.97879	0.0216027	4.52137	0.65314	7.51757	0.467174	27.7778	726.395	1.22884	1.78998	4.52137	0.70134	0.153891	0.50795	0.0221607	8.69474	0.298122	7.19391	0.309825	27.4737	709.352	1.14364	1.70751	8.69474	0.788819	0.144483	0.483215	9.77e-07	10	190	s
958	143	52	6.51957	2.03066	2.13184	10.3796	180.779	810.552	19.0109	0.777417	0.866209	0.0355342	2.3382	0.667598	4.51714	0.560415	30.9812	903.578	1.11739	1.55449	2.3382	0.586189	0.176001	0.509092	0.0353499	5.27551	0.305807	4.79974	0.413494	30.7857	893.454	1.06147	1.56006	5.27551	0.724674	0.0926161	0.374946	9.86e-07	11	679	s
959	73	25	4.46391	0.715498	3.09864	5.58226	444.606	808.885	12.271	0.730402	-0.775636	0.0197668	6.19592	0.576123	8.30862	0.383462	27.102	691.292	1.25144	1.82955	6.19592	0.752894	0.145086	0.498889	0.030404	14.6939	0.0857735	9.03623	0.307863	26.6531	668.282	1.14168	1.63417	14.6939	0.895231	0.0941027	0.386038	1.38e-06	25	4309	l
960	222	55	7.87426	1.83016	3.23212	11.0203	542.931	813.331	19.5421	0.421495	-1.01938	0.0430628	3.01774	0.707737	6.16272	0.539687	24.6907	570.743	1.17245	1.61173	3.01774	0.621127	0.18744	0.532425	0.0374341	4.78443	0.342612	4.63897	0.442299	24.1377	542.93	1.04749	1.5956	4.78443	0.70584	0.0727531	0.336888	1.21e-06	16	4309	l
961	60	31	4.25611	1.64926	1.28426	7.1845	53.0813	810.337	14.7177	0.922952	-0.21077	0.0710299	1.57838	0.39824	2.31147	0.587027	33.7297	1083.08	0.875298	1.24063	1.57838	0.50511	0.0719759	0.297436	0.109734	2.84848	-0.273399	2.11846	0.521212	33.6364	1087.62	0.681968	1.02633	2.84848	0.583185	0.0869226	0.298409	5.72e-07	7	1125	s
962	288	68	9.18719	2.44262	3.81132	13.1997	462.368	814.842	25.6925	0.711901	0.0156939	0.0375095	3.05808	0.729838	6.65972	0.536102	25.759	623.035	1.19364	1.65118	3.05808	0.63392	0.197211	0.550633	0.0278749	7.87552	0.347461	7.03452	0.398848	25.6929	618.015	1.16231	1.75191	7.87552	0.797763	0.0759276	0.359352	1.39e-06	24	4309	l
963	171	49	7.28564	2.12614	3.97582	11.3637	18.9736	813.886	22.6007	0.881529	-0.046228	0.0286496	3.33723	0.739908	7.41547	0.490046	27.0768	690.785	1.22219	1.70806	3.33723	0.648312	0.205847	0.569434	0.030372	7.81452	0.330128	6.83284	0.358984	26.6532	667.599	1.11732	1.67431	7.81452	0.79786	0.102764	0.407284	4.16e-07	6	1125	s
964	46	21	3.3745	0.703424	2.08711	4.38328	193.82	811.275	9.72421	0.773266	-0.138941	0.0846782	1.63699	0.183298	2.00219	0.600685	34.3767	1131.42	0.775366	1.13175	1.63699	0.516719	0.0398448	0.212058	0.0820452	1.65517	0.23348	2.07967	0.544828	34.4828	1139.16	0.770764	1.1237	1.65517	0.489089	0.079003	0.297126	1.03e-06	12	679	s
965	337	66	10.0784	1.49642	6.88581	13.7496	526.335	819.935	23.5905	0.478929	-1.18384	0.022323	3.61351	0.711699	7.26689	0.477039	25.7177	620.489	1.24246	1.77102	3.61351	0.659331	0.180323	0.544075	0.0166205	8.85971	0.295212	7.28537	0.334989	25.4353	604.257	1.18704	1.87463	8.85971	0.82342	0.0669117	0.348867	1.26e-06	11	4309	l
966	292	65	9.36889	2.58417	3.57231	14.0255	173.114	822.298	27.4799	0.840201	-0.0134544	0.0337082	1.95157	0.77875	5.41031	0.592877	30.5024	875.063	1.1873	1.59724	1.95157	0.55484	0.246569	0.601555	0.0239791	4.09402	0.533061	5.38388	0.431279	30.3248	864.111	1.15854	1.68992	4.09402	0.67083	0.123271	0.44619	9.66e-07	10	679	s
967	171	43	6.94956	1.00779	4.77294	8.51207	483.071	819.594	18.1206	0.65368	0.435036	0.0418382	3.40066	0.721431	7.10379	0.536096	26.3169	652.849	1.18059	1.61533	3.40066	0.650059	0.202291	0.552076	0.0501545	5.81967	0.383514	5.72003	0.44564	25.2951	602.009	1.02681	1.46799	5.81967	0.738511	0.116578	0.407642	1.36e-06	20	4309	l
968	103	30	5.28833	0.415228	4.61459	6.07957	501.688	821.422	12.8994	0.481128	0.974905	0.0287762	4.41737	0.669736	7.68763	0.45984	26.5294	663.878	1.20068	1.69593	4.41737	0.703414	0.191247	0.548972	0.0336836	9.36986	0.280498	7.51135	0.366898	25.8082	625.101	1.14193	1.55873	9.36986	0.811979	0.115309	0.416708	1.33e-06	9	4309	l
969	99	44	5.33665	1.29486	2.1004	7.7079	456.298	825.441	12.5703	0.298093	0.622737	0.0658132	1.32808	0.534536	2.42662	0.635016	33.0126	1034.52	0.91681	1.26898	1.32808	0.490585	0.129726	0.401764	0.0626221	2.46875	0.17802	2.50171	0.565257	33.3438	1058.58	0.862335	1.27762	2.46875	0.593034	0.0663772	0.289791	1.38e-06	23	4309	l
970	168	43	6.9103	0.944705	4.28974	8.35586	512.205	829.396	17.4296	0.586088	0.79931	0.0370951	4.43412	0.698532	8.3542	0.473443	24.1605	551.419	1.21626	1.7206	4.43412	0.707034	0.187383	0.547125	0.044281	8.44531	0.322229	7.23021	0.393313	23.8203	532.414	1.10604	1.61832	8.44531	0.814019	0.106891	0.408686	1.28e-06	10	4309	l
971	409	76	10.9668	1.9431	6.45274	14.62	469.166	837.461	26.4098	0.49413	0.630612	0.0271079	3.26551	0.701284	6.46591	0.517798	25.9833	631.896	1.21848	1.72952	3.26551	0.646632	0.176018	0.532735	0.0214187	6.88182	0.340157	6.21474	0.378775	25.4212	602.741	1.15676	1.8001	6.88182	0.769477	0.0597047	0.32383	1.35e-06	20	4309	l
972	46	20	3.405	0.682605	1.8	4.38634	71.9259	830.901	9.52067	0.747288	0.254269	0.115101	0.835616	0.428626	1.73123	0.672603	34.726	1156.38	0.751145	1.01906	0.835616	0.389534	0.10504	0.326845	0.107249	1.80769	-0.245033	1.72596	0.511538	34.5	1149.13	0.617315	1.03742	1.80769	0.483837	0.0638842	0.257236	6.26e-07	8	121	s
973	106	34	5.36403	0.941458	3.49617	6.65005	499.578	835.617	15.0091	0.727301	1.31702	0.044346	5.36712	0.572005	7.27007	0.47306	24.2548	552.784	1.16647	1.63735	5.36712	0.731273	0.163346	0.502659	0.105441	11.641	0.12177	7.62755	0.430836	23.9487	542.851	0.970854	1.33519	11.641	0.830472	0.124208	0.40258	1.3e-06	13	4309	l
974	289	68	10.186	3.82762	4.06654	16.2863	107.662	842.208	34.2527	0.936571	-0.770496	0.0456828	1.97389	0.742498	4.83276	0.588231	30.1151	853.325	1.13289	1.53157	1.97389	0.558758	0.219484	0.560794	0.032295	4.73009	0.390698	4.88156	0.444173	29.6947	828.074	1.10663	1.64598	4.73009	0.709996	0.0795778	0.357094	7.39e-07	8	1091	s
975	149	42	6.59051	1.81919	3.44251	9.62108	159.681	836.701	20.1834	0.859266	0.284136	0.0471207	1.51248	0.712261	3.62821	0.613503	32.5451	999.668	1.07023	1.44294	1.51248	0.511143	0.199646	0.523324	0.0424465	2.87611	0.440837	3.57179	0.480843	32.4159	992.8	1.02503	1.45983	2.87611	0.607518	0.0928959	0.364098	9.16e-07	11	221	s
976	126	36	5.89117	0.729192	4.29937	7.21388	488.124	842.11	14.2914	0.414458	-0.702249	0.0344034	4.94545	0.644167	7.94913	0.471693	24.7591	577.372	1.21083	1.7321	4.94545	0.725176	0.163755	0.515531	0.0281576	10.625	0.307761	8.67437	0.347301	24.7708	576.93	1.17301	1.69408	10.625	0.852831	0.162316	0.508563	1.31e-06	14	4309	l
977	369	91	10.8932	3.97813	1.18478	18.546	595.427	854.396	36.001	0.826553	-0.904456	0.0254735	3.68793	0.635012	6.05213	0.488334	27.2733	696.931	1.18868	1.72727	3.68793	0.6686	0.137898	0.475104	0.0268087	7.73379	0.231489	6.03167	0.373969	27.2014	692.774	1.11725	1.75829	7.73379	0.803339	0.0589838	0.318356	9.35e-07	10	864	s
978	98	31	5.23231	1.08944	3.6567	7.21226	258.348	848.591	15.5473	0.813575	0.313468	0.0226979	5.21429	0.713625	10.1039	0.438698	23.6369	530.841	1.28428	1.79423	5.21429	0.726706	0.197046	0.569581	0.0185868	14.6076	0.317967	11.7089	0.254317	24	545.403	1.25852	1.81039	14.6076	0.899024	0.139576	0.487724	1.21e-06	22	132	l
979	140	37	6.23917	0.774233	4.61347	7.56684	114.306	855.947	15.478	0.581615	-1.32903	0.0330345	2.45639	0.695008	5.02698	0.531544	29.8154	835.559	1.14648	1.60217	2.45639	0.592138	0.181322	0.522941	0.0391153	6.43396	0.266473	5.38564	0.404824	29.717	831.418	1.07594	1.51081	6.43396	0.750167	0.11667	0.413171	7.42e-07	10	168	s
980	249	62	9.48401	3.24565	4.29214	15.0506	81.8329	859.212	30.2929	0.92782	-0.515798	0.025489	3.3692	0.801544	9.48854	0.522486	29.8811	849.001	1.27312	1.76305	3.3692	0.643211	0.237245	0.614693	0.0185165	9.67539	0.454459	9.86771	0.326302	29.4346	820.273	1.24807	1.8774	9.67539	0.844005	0.104599	0.43261	6.26e-07	11	1091	s
981	185	47	7.74289	2.7275	2.7351	11.9356	132.481	863.244	25.243	0.918028	-0.933656	0.0335781	2.62175	0.80645	7.77277	0.592092	30.4655	881.224	1.19517	1.60179	2.62175	0.591956	0.265392	0.622463	0.0355616	5.19858	0.603663	7.55828	0.50086	30.1489	862.416	1.14236	1.56642	5.19858	0.697255	0.178286	0.513865	7.88e-07	10	274	s
982	147	60	6.75136	2.17969	1.28506	11.2554	173.18	861.659	21.6654	0.816583	0.445793	0.0216428	5.42083	0.76173	12.3754	0.473247	27.3958	720.5	1.31098	1.82098	5.42083	0.743158	0.219682	0.601655	0.0228809	12.8	0.447769	12.5894	0.359189	26.8211	686.448	1.26934	1.75944	12.8	0.882145	0.178212	0.539658	9.28e-07	13	4159	l
983	41	18	3.17123	0.233231	2.66667	3.4801	21.2413	862.018	7.31538	0.215437	1.10939	0.228521	0.446154	0.420357	1.38485	0.795385	36.2462	1270.83	0.612791	0.761905	0.446154	0.320605	0.115677	0.298837	0.189981	0.782609	-0.0197044	1.38374	0.66087	36.1739	1271.21	0.530495	0.783734	0.782609	0.349966	0.0612573	0.219818	3.82e-07	5	134	s
984	333	86	11.547	4.89991	2.05896	18.9481	563.183	876.048	41.8779	0.949726	-1.05778	0.0277937	2.24831	0.815059	7.07843	0.561966	28.8771	786.847	1.22243	1.66992	2.24831	0.576985	0.247507	0.613232	0.0280304	5.09766	0.607109	7.48736	0.463281	28.3477	758.922	1.18021	1.72617	5.09766	0.725991	0.16461	0.516024	9.53e-07	13	2739	s
985	394	80	11.5571	3.59712	5.24001	18.2964	61.2656	871.135	35.7903	0.869962	0.12872	0.0231327	2.29338	0.810188	7.04118	0.555362	29.3108	809.171	1.25193	1.71553	2.29338	0.578209	0.239222	0.610399	0.01721	5.20743	0.553548	6.83202	0.398877	28.9907	789.675	1.21384	1.82789	5.20743	0.719373	0.106801	0.431691	5.29e-07	11	1091	s
986	306	63	9.35179	1.93596	4.45285	12.585	199.433	870.405	24.7477	0.715657	0.753747	0.0223429	3.91097	0.737158	8.43977	0.494412	24.6304	571.223	1.27713	1.81448	3.91097	0.670231	0.19325	0.567178	0.0186149	8.60569	0.397194	8.13803	0.384653	24.1585	545.916	1.22451	1.85645	8.60569	0.825351	0.120989	0.461131	9.91e-07	15	4159	l
987	182	56	7.22502	2.43596	1.26383	11.4373	583.117	874.663	21.9054	0.763678	0.0280682	0.0218414	5.30781	0.634801	8.26701	0.426902	25.6651	619.033	1.26686	1.80808	5.30781	0.733375	0.152087	0.50736	0.0283961	11.3228	0.119204	7.42761	0.319637	24.8819	578.396	1.13302	1.69671	11.3228	0.849616	0.100634	0.405657	9e-07	12	864	s
988	140	38	6.30905	1.26063	3.55799	8.31146	604.24	875.396	17.3775	0.76424	-1.08053	0.0359547	2.41752	0.683589	4.82021	0.538374	30.4582	873.36	1.12403	1.58524	2.41752	0.587846	0.171814	0.507613	0.0411693	4.13131	0.334232	4.10267	0.401723	29.7677	833.618	1.03898	1.47255	4.13131	0.642731	0.0989492	0.376988	8.44e-07	13	864	s
989	196	55	7.83757	2.10278	4.48085	12.0968	181.712	878.13	22.6603	0.833701	-0.46475	0.027599	2.74052	0.793792	7.64505	0.538985	29.1079	801.807	1.21581	1.69325	2.74052	0.612057	0.230566	0.597315	0.0182878	5.47586	0.617027	8.14916	0.388569	28.869	787.375	1.22381	1.80354	5.47586	0.717776	0.157506	0.515115	9.05e-07	14	4159	l
990	216	51	7.86687	1.69563	4.62749	10.5979	92.0923	881.275	19.4159	0.508521	1.02909	0.0459978	1.4696	0.764033	4.11399	0.606587	31.5938	942.485	1.07333	1.4334	1.4696	0.493556	0.228817	0.55634	0.0416477	2.89349	0.506622	3.93233	0.483625	31.3669	929.694	1.02122	1.4824	2.89349	0.613003	0.117838	0.411595	6.12e-07	13	254	s
991	194	48	7.35469	1.35405	3.66459	9.36594	111.507	882.49	16.9561	0.308737	-0.323863	0.043893	1.60756	0.655994	3.33652	0.595276	32.4477	994.576	1.03371	1.43383	1.60756	0.514194	0.162418	0.473171	0.0504592	3.11429	0.292864	3.20204	0.469644	32.1429	978.263	0.956817	1.39568	3.11429	0.617717	0.0613821	0.290842	6.7e-07	11	710	s
992	304	81	11.4228	5.30711	3.15984	20.9198	535.944	885.123	43.5148	0.972739	-0.640472	0.0224408	3.51169	0.725466	7.39573	0.51216	28.8475	784.676	1.23221	1.78088	3.51169	0.654629	0.179193	0.543768	0.0195412	6.07692	0.510653	7.20922	0.412006	28.8376	782.486	1.20202	1.83959	6.07692	0.752822	0.106892	0.433107	9.91e-07	14	2739	s
993	199	50	7.60373	1.74485	4.05941	10.6301	511.807	885.204	20.9117	0.712725	-0.713814	0.0198952	3.24079	0.793988	8.86553	0.513	27.3796	708.451	1.2984	1.81315	3.24079	0.63896	0.238512	0.622893	0.0141657	6.52439	0.597484	9.10451	0.337751	27.378	707.485	1.27075	1.90758	6.52439	0.754204	0.154678	0.523165	1.05e-06	9	2739	s
994	167	56	6.89395	2.08521	2.51431	11.1708	194.291	885.099	20.5448	0.788835	-0.348123	0.0302201	3.34211	0.692973	6.44269	0.491162	27.5175	711.759	1.18638	1.68228	3.34211	0.645329	0.178826	0.53042	0.0281982	9.76562	0.275677	7.74121	0.359135	27.8125	727.701	1.15726	1.68057	9.76562	0.841743	0.0812988	0.364336	9.14e-07	15	4159	l
995	167	56	6.89395	2.08521	2.51431	11.1708	194.291	885.099	20.5448	0.788835	-0.348123	0.0302201	3.34211	0.692973	6.44269	0.491162	27.5175	711.759	1.18638	1.68228	3.34211	0.645329	0.178826	0.53042	0.0281982	9.76562	0.275677	7.74121	0.359135	27.8125	727.701	1.15726	1.68057	9.76562	0.841743	0.0812988	0.364336	9.14e-07	15	4159	l
996	61	24	3.93325	0.416705	2.92647	4.65269	48.387	882.486	9.62959	0.443768	-0.084155	0.0267568	3.58706	0.607837	5.57343	0.425216	31.4677	934.024	1.14742	1.65169	3.58706	0.637768	0.143338	0.474453	0.0282709	9.53846	0.0913191	6.24852	0.271232	31.0769	913.167	1.04841	1.65077	9.53846	0.759918	0.206462	0.562295	4.56e-07	10	71	s
997	496	81	12.2162	2.51922	6.96366	16.6581	224.848	892.297	32.5089	0.755151	0.652933	0.038529	2.64313	0.691341	5.28163	0.601839	25.3949	601.346	1.16965	1.61136	2.64313	0.591072	0.212856	0.564588	0.0305827	5.0095	0.363323	4.9341	0.4649	25.1948	591.317	1.09934	1.67351	5.0095	0.708519	0.091611	0.385264	9.6e-07	16	1590	l
998	411	79	11.6012	3.25234	5.15561	17.7364	134.164	896.327	33.7913	0.82355	-0.993229	0.0233351	2.73702	0.795945	7.70658	0.537568	26.7623	674.045	1.26808	1.75055	2.73702	0.602976	0.239635	0.615717	0.0211822	5.62575	0.523563	6.90398	0.422836	26.3204	649.223	1.19602	1.79566	5.62575	0.737322	0.112312	0.438619	6.86e-07	12	4159	l
999	190	43	7.42315	0.992729	5.1358	9.54206	545.932	892.061	18.2771	0.610111	-0.548547	0.0272329	2.38676	0.811245	7.32238	0.562658	27.6221	718.917	1.23997	1.69938	2.38676	0.591225	0.255783	0.626504	0.0258937	5.08392	0.576859	7.00735	0.417214	27.1399	693.317	1.17119	1.73983	5.08392	0.709781	0.138932	0.478293	9.24e-07	15	2739	s
1000	179	42	7.28633	1.66874	4.00963	9.83826	35.2971	894.128	21.2188	0.827617	0.479039	0.0326537	3.80408	0.638747	6.26512	0.516048	25.7853	622.139	1.1909	1.6897	3.80408	0.668119	0.183398	0.537647	0.0346939	7.28571	0.326409	6.40811	0.437887	25.8429	624.525	1.14108	1.6484	7.28571	0.771466	0.167754	0.510438	3.8e-07	8	212	s
1001	206	57	8.47074	2.96628	3.43237	13.5119	99.4156	898.555	29.022	0.922935	-0.547553	0.0271634	3.68194	0.782366	9.45902	0.498612	27.2042	703.633	1.25269	1.75483	3.68194	0.669178	0.215585	0.587869	0.0290862	9.94578	0.441495	9.90393	0.407585	27.1867	699.974	1.21938	1.71997	9.94578	0.851838	0.126699	0.455603	5.78e-07	11	710	s
1002	207	57	7.64973	1.80385	3.08073	10.4512	206.061	899.927	19.4913	0.559396	-0.974246	0.0267935	3.62983	0.715614	7.38189	0.518814	25.7707	623.322	1.24676	1.74925	3.62983	0.663579	0.214416	0.585682	0.0221966	7.71951	0.400111	7.43412	0.375174	25.5366	609.961	1.20668	1.774	7.71951	0.790731	0.118895	0.448202	8.67e-07	12	1590	l
1003	152	43	6.55946	1.07583	4.34311	8.66977	82.5805	899.554	17.1332	0.620846	-0.821968	0.0380531	5.34087	0.693534	9.71365	0.489376	22.8098	494.606	1.2438	1.71492	5.34087	0.73142	0.20789	0.572932	0.0385186	7.78505	0.374223	7.2203	0.377424	21.6168	437.893	1.10348	1.61693	7.78505	0.792696	0.120166	0.432149	5.24e-07	11	710	s
1004	152	43	6.55946	1.07583	4.34311	8.66977	82.5805	899.554	17.1332	0.620846	-0.821968	0.0380531	5.34087	0.693534	9.71365	0.489376	22.8098	494.606	1.2438	1.71492	5.34087	0.73142	0.20789	0.572932	0.0385186	7.78505	0.374223	7.2203	0.377424	21.6168	437.893	1.10348	1.61693	7.78505	0.792696	0.120166	0.432149	5.24e-07	11	710	s
1005	213	56	7.51462	1.86559	1.83129	10.5778	505.925	899.745	20.0628	0.661111	0.179457	0.0238841	2.84595	0.77669	7.37219	0.544525	29.4834	819.781	1.24976	1.74051	2.84595	0.609361	0.22691	0.599571	0.02081	6.1962	0.493539	7.11716	0.387794	29.1582	799.685	1.20447	1.7713	6.1962	0.747684	0.147517	0.495787	9.71e-07	9	2739	s
1006	131	39	5.97002	1.138	3.01061	7.7633	55.0018	899.863	15.5581	0.657212	-0.346824	0.0325461	4.10965	0.678542	7.39219	0.500603	28.6009	772.46	1.19649	1.71125	4.10965	0.69273	0.174701	0.528514	0.0319589	7.31373	0.459743	7.76874	0.381413	28.9412	789.807	1.19148	1.6807	7.31373	0.790524	0.156255	0.497888	4.34e-07	10	146	s
1007	191	63	7.94447	1.86387	3.8254	12.0284	160.512	906.543	21.0706	0.733414	1.12547	0.0230272	3.51302	0.77548	8.8234	0.507752	27.5283	717.251	1.27057	1.7781	3.51302	0.653877	0.227595	0.605475	0.0168667	9.26	0.479892	9.90199	0.318723	27.4067	710.193	1.25624	1.85638	9.26	0.826762	0.144293	0.500756	7.09e-07	13	4159	l
1008	171	41	7.1402	1.4857	4.55647	9.65657	490.581	904.055	19.681	0.794325	0.704804	0.0501888	1.64086	0.651688	3.35544	0.5903	32.3064	985.32	1.0408	1.42321	1.64086	0.515648	0.178065	0.492797	0.0410517	4.10949	0.274652	3.83277	0.445563	32.1095	973.615	1.02263	1.52525	4.10949	0.677283	0.071458	0.326919	9.63e-07	12	2739	s
1009	116	32	5.72577	0.782319	4.55286	7.06955	531.889	902.783	15.3697	0.7023	-0.757012	0.0182106	5.38025	0.641287	8.49938	0.412495	23.4444	516.452	1.2671	1.86631	5.38025	0.730232	0.160525	0.52726	0.019025	12.5517	0.2513	9.38235	0.295035	23.1494	502.531	1.20511	1.8156	12.5517	0.8714	0.183587	0.554253	8.94e-07	12	2739	s
1010	90	31	4.93088	1.27108	2.78934	6.82073	390.35	905.685	15.0404	0.839743	-1.56663	0.0259876	3.99672	0.577176	5.72623	0.492563	28.3967	756.715	1.1606	1.67654	3.99672	0.68307	0.147306	0.483757	0.0286391	8.58462	0.0637101	5.58438	0.317685	28.4308	758.976	1.05883	1.60266	8.58462	0.77443	0.11787	0.426464	9.81e-07	15	385	s
1011	406	63	10.9586	1.28548	8.16609	13.3863	275.031	911.877	25.9205	0.526498	0.797281	0.0303514	2.23128	0.781617	6.10864	0.576794	26.1319	638.635	1.22341	1.65768	2.23128	0.573886	0.251485	0.615839	0.0212573	5.27907	0.473934	6.0175	0.421501	25.7849	620.417	1.1754	1.77555	5.27907	0.726313	0.120273	0.450832	9.05e-07	14	541	s
1012	265	64	8.95253	1.84021	5.04637	12.778	223.303	909.135	20.4282	0.17767	-0.876606	0.0225646	4.38151	0.734801	9.26078	0.494561	26.2072	650.477	1.271	1.81665	4.38151	0.703294	0.188624	0.561255	0.0183117	9.88208	0.407548	9.33997	0.357216	26.0896	641.216	1.23529	1.83428	9.88208	0.85454	0.100259	0.419546	8.46e-07	11	1590	l
1013	293	85	9.58688	3.61392	2.55681	17.0886	23.8036	918.663	29.9253	0.833589	1.40657	0.0193529	3.20117	0.796249	8.8556	0.514618	26.7285	674.592	1.30469	1.82478	3.20117	0.634053	0.235802	0.621308	0.0172882	6.95755	0.518704	8.22792	0.390426	25.7972	625.143	1.23727	1.84729	6.95755	0.772394	0.148222	0.505974	2.79e-07	5	1075	c
1014	59	26	3.97915	1.19755	2.14869	5.71112	447.482	905.428	12.9977	0.888922	-0.145516	0.0616066	1.52105	0.424167	2.32074	0.580526	33.6579	1077.51	0.889778	1.26797	1.52105	0.494861	0.0734965	0.303668	0.058391	3.47059	-0.104018	2.5718	0.421107	33.3529	1061.63	0.813491	1.30779	3.47059	0.615622	0.051163	0.257609	9.87e-07	16	92	s
1015	98	33	5.21648	1.16202	2.483	7.11476	596.125	909.618	14.9603	0.74874	0.178609	0.0163576	5.64759	0.654805	9.18029	0.398316	27.3825	708.962	1.26955	1.8673	5.64759	0.742709	0.175791	0.549769	0.0235714	13.3714	0.170927	9.06408	0.300468	27.8286	729.055	1.17956	1.68496	13.3714	0.896893	0.120447	0.440712	7.05e-07	12	248	s
1016	467	93	12.4269	4.79816	0.95705	20.356	125.319	917.351	40.6949	0.859801	0.108137	0.0230218	3.61304	0.791107	9.64805	0.502705	25.6612	624.094	1.30725	1.81895	3.61304	0.66148	0.230149	0.613931	0.019071	8.2376	0.539424	9.9427	0.370604	25.3342	606.557	1.2713	1.86329	8.2376	0.815789	0.129057	0.476106	5.62e-07	9	4159	l
1017	105	34	5.32771	0.932182	3.58257	6.57174	411.432	910.469	14.066	0.722933	-0.211609	0.0364523	2.77008	0.481566	3.67159	0.495649	33.3296	1051.89	1.01909	1.47589	2.77008	0.602492	0.0870414	0.354513	0.0364311	4.98701	0.0359937	3.58661	0.37338	33.7922	1083.88	0.951386	1.48378	4.98701	0.684468	0.0288642	0.206215	9.47e-07	15	163	s
1018	500	85	13.0074	4.01048	5.12732	20.3876	203.216	923.197	39.2368	0.860134	-0.689786	0.0351665	2.47454	0.743415	5.82207	0.578246	25.8646	625.031	1.20251	1.64622	2.47454	0.588463	0.231625	0.591864	0.0278689	5.72685	0.455617	6.25995	0.453014	25.8148	622.361	1.17646	1.74023	5.72685	0.742832	0.110242	0.428665	7.03e-07	10	1590	l
1019	131	38	6.25363	1.73548	3.57052	9.05022	539.085	915.677	20.0077	0.884816	-1.05394	0.0226567	3.89231	0.712696	7.77384	0.470621	27.9407	736.6	1.23117	1.75007	3.89231	0.674208	0.188318	0.552258	0.0223823	9.57895	0.302721	7.86881	0.30124	27.0947	689.784	1.17395	1.74323	9.57895	0.824892	0.117949	0.44303	7.91e-07	12	182	s
1020	44	20	3.29419	0.689784	2.10297	4.16203	468.948	911.208	9.43403	0.759845	-0.0710942	0.0985456	1.89209	0.223719	2.21869	0.589209	32.8993	1031.74	0.824973	1.1764	1.89209	0.548407	0.0318961	0.193424	0.0658284	2.84615	-0.152096	2.23521	0.453846	33.4615	1071.64	0.757676	1.23708	2.84615	0.57579	0.0638446	0.279903	9.3e-07	13	2739	s
1021	150	38	6.58293	1.14536	4.12764	8.54619	568.942	917.364	17.7111	0.755734	0.491436	0.0252517	2.27307	0.816665	7.19923	0.535396	30.533	880.985	1.23344	1.6908	2.27307	0.570717	0.246618	0.61523	0.0193056	6.75833	0.519549	8.03332	0.353603	30.3417	869.116	1.22567	1.78787	6.75833	0.751023	0.143579	0.491535	7.18e-07	13	380	s
1022	86	29	4.77223	0.743544	2.7261	5.78499	447.961	917.126	11.825	0.516681	-0.260408	0.050147	2.29553	0.524004	3.4113	0.545555	30.8316	895.897	1.02311	1.45861	2.29553	0.571475	0.122054	0.415584	0.0452835	5.55738	0.14938	4.26666	0.359949	30.6393	886.039	0.999345	1.4963	5.55738	0.714795	0.125485	0.426077	8.9e-07	13	120	s
1023	176	46	7.19907	1.45894	4.61346	10.15	493.864	921.893	19.0647	0.70468	-1.20736	0.0307747	2.43317	0.744803	5.76723	0.554801	28.5266	764.869	1.17271	1.63126	2.43317	0.592633	0.202269	0.554296	0.0285311	6.14599	0.432095	6.4111	0.392246	28.5839	768.962	1.13466	1.69647	6.14599	0.733686	0.10554	0.415007	8.18e-07	8	2739	s
1024	225	60	8.40954	2.62195	3.53624	12.1081	329.671	920.729	26.7813	0.885747	0.277869	0.0422955	1.69231	0.688116	3.71304	0.587701	31.7024	947.503	1.07001	1.47457	1.69231	0.523032	0.190773	0.516975	0.032098	3.73143	0.37763	3.99776	0.456256	31.7429	951.439	1.03162	1.58632	3.73143	0.665915	0.0946339	0.381821	8.54e-07	13	503	s
1025	104	32	5.56879	1.50398	2.68823	7.67962	591.107	919.789	17.0279	0.861044	-0.92123	0.0180678	5.44789	0.584	7.54794	0.395787	26.4563	656.769	1.23681	1.82459	5.44789	0.733901	0.139234	0.488823	0.0371771	11.9855	0.0482282	7.29642	0.348254	25.7536	623.876	1.04177	1.52894	11.9855	0.883537	0.16177	0.485731	6.58e-07	11	248	s
1026	104	32	5.56879	1.50398	2.68823	7.67962	591.107	919.789	17.0279	0.861044	-0.92123	0.0180678	5.44789	0.584	7.54794	0.395787	26.4563	656.769	1.23681	1.82459	5.44789	0.733901	0.139234	0.488823	0.0371771	11.9855	0.0482282	7.29642	0.348254	25.7536	623.876	1.04177	1.52894	11.9855	0.883537	0.16177	0.485731	6.58e-07	11	248	s
1027	89	27	4.91422	0.530235	4.01096	5.7907	52.7466	918.176	12.4024	0.579989	-0.182153	0.0292932	4.39016	0.608187	6.60237	0.458004	26.6656	667.365	1.18332	1.69424	4.39016	0.682379	0.169414	0.518829	0.0318678	9.91935	0.181294	7.05795	0.333107	26.2419	646.453	1.09952	1.59088	9.91935	0.836036	0.144652	0.468713	3.68e-07	7	106	s
1028	321	66	9.90761	2.83723	3.63715	14.6024	425.967	925.275	29.6073	0.864951	-0.772563	0.0550062	1.26158	0.720529	3.25708	0.6449	31.7676	952.918	1.02427	1.37036	1.26158	0.479626	0.213404	0.528379	0.0539889	2.32472	0.456879	3.14015	0.562776	31.7565	954.035	0.970115	1.39605	2.32472	0.589919	0.0954982	0.361451	8.22e-07	11	675	s
1029	234	54	8.41007	2.44014	3.71706	12.8597	300.531	922.179	25.3284	0.852826	-0.194405	0.0266704	3.10464	0.733182	6.81789	0.512959	26.3627	651.146	1.24337	1.74535	3.10464	0.636584	0.203143	0.571031	0.018488	8.22843	0.34905	7.32032	0.351559	26.3604	649.884	1.20427	1.84437	8.22843	0.810409	0.0884144	0.396044	8.36e-07	13	278	s
1030	116	39	5.51571	1.55388	1.63561	8.07073	376.386	924.817	16.1778	0.792843	-1.01902	0.0780908	1.31218	0.529567	2.39466	0.638265	33.9924	1099.45	0.898855	1.25904	1.31218	0.485616	0.117646	0.381601	0.0620093	2.49367	0.0998062	2.38507	0.467089	33.9367	1098.69	0.836177	1.26305	2.49367	0.552098	0.0663915	0.288236	8.21e-07	12	385	s
1031	142	42	6.32338	1.85641	1.98135	9.35399	478.114	927.316	19.3457	0.829463	-1.55241	0.0319154	2.43522	0.676256	4.76103	0.523794	29.8563	837.69	1.13205	1.609	2.43522	0.581819	0.170336	0.508797	0.0256617	6.07895	0.303367	5.36309	0.396231	29.9386	843.029	1.10016	1.64983	6.07895	0.755189	0.0609448	0.313866	7.88e-07	7	2739	s
1032	254	55	8.59401	1.85941	4.28679	11.0385	257.597	928.219	22.8092	0.721672	0.898477	0.0466084	2.03162	0.647456	3.88138	0.600551	28.9891	788.311	1.0818	1.50505	2.03162	0.557615	0.182293	0.51046	0.0372789	3.72381	0.365534	3.9346	0.479892	29.0667	793.473	1.04064	1.55621	3.72381	0.668358	0.0690665	0.324582	7.52e-07	11	745	s
1033	71	26	4.34629	0.816096	2.72833	5.60748	949.984	922.334	12.3252	0.771315	-0.363458	0.0214175	4.53165	0.547192	6.00393	0.430729	27.2996	697.898	1.17652	1.73687	4.53165	0.696656	0.121902	0.449288	0.0467825	9.65385	0.17429	6.84578	0.289979	28.0385	743.716	1.0202	1.45848	9.65385	0.769931	0.16193	0.476042	4.49e-07	6	104	c
1034	68	30	4.40043	1.70053	0.971825	6.7536	522.094	926.4	15.6787	0.919431	1.39174	0.098424	1.07798	0.46654	2.01037	0.664679	34.5459	1139.97	0.826343	1.1374	1.07798	0.455325	0.0996409	0.335313	0.119048	1.57143	-0.0206186	1.76984	0.585714	34.6667	1156.43	0.682501	1.02008	1.57143	0.505073	0.0233811	0.154414	7.44e-07	10	117	s
1035	95	32	5.07857	1.02704	3.37225	6.96398	988.727	926.47	14.1336	0.775896	-1.26645	0.0782179	1.35802	0.457233	2.25102	0.635367	31.6728	951.986	0.877708	1.22295	1.35802	0.49333	0.0873393	0.325081	0.0730014	2.87324	0.0294827	2.48026	0.476056	31.7746	963.039	0.790916	1.2218	2.87324	0.589459	0.0827579	0.316395	2.95e-07	3	184	c
1036	65	27	4.17646	1.21163	2.05847	6.05655	354.305	925.081	13.2391	0.864853	-0.197295	0.0453119	2.07547	0.466019	2.9434	0.531785	32	969.021	0.962562	1.39474	2.07547	0.544948	0.0955168	0.361327	0.0588935	4.21951	-0.1669	2.808	0.397495	32.3659	997.414	0.831717	1.32556	4.21951	0.66057	0.0872634	0.337523	8.18e-07	11	503	s
1037	112	38	5.62404	1.54514	3.13025	8.46718	407.465	925.831	17.5159	0.855997	-0.118347	0.0399591	3.41732	0.567892	4.95424	0.499687	27.6535	716.22	1.12394	1.58321	3.41732	0.655878	0.138857	0.458705	0.0459184	5.72619	0.105859	4.20206	0.402839	27.5357	712.023	0.984992	1.44893	5.72619	0.709989	0.0772944	0.331612	8.16e-07	10	675	s
1038	93	35	5.39196	1.97521	2.0763	8.39538	459.101	928.076	18.5736	0.92899	-0.407533	0.136797	0.783172	0.383752	1.63544	0.693851	34.3883	1134.69	0.729279	0.977095	0.783172	0.389737	0.0736548	0.268321	0.103638	1.67188	0.0131854	1.84711	0.576562	34.4531	1140.11	0.713081	1.09212	1.67188	0.515819	0.0209501	0.151185	7.92e-07	8	206	s
1039	90	29	4.93322	0.748286	3.58637	6.23947	553.9	926.729	12.6714	0.602019	-0.285951	0.0330826	3.64821	0.563915	5.18291	0.497925	28.5212	763.117	1.13443	1.61404	3.64821	0.665197	0.138005	0.461287	0.0330579	7.93939	0.162818	5.74174	0.368783	28.8182	780.22	1.08386	1.57579	7.93939	0.80411	0.101598	0.393964	6.86e-07	11	380	s
1040	92	34	5.12514	1.25898	3.00014	7.56157	393.663	928.806	14.9623	0.8174	-0.259314	0.0309283	3.18627	0.585674	4.84513	0.502074	29.4412	814.191	1.12163	1.63501	3.18627	0.637724	0.128083	0.447752	0.0246786	7.10606	0.182441	5.3459	0.325605	29.3182	807.424	1.0844	1.70144	7.10606	0.764243	0.0987455	0.402491	7.88e-07	10	675	s
1041	65	29	4.24265	1.4654	1.62655	6.4212	575.07	934.316	14.2232	0.89493	-0.239838	0.0673192	2.24519	0.427168	2.95973	0.554779	32.1298	977.229	0.958742	1.35785	2.24519	0.580266	0.0973165	0.360117	0.0603807	3.21951	0.0830227	2.7555	0.437016	32.0488	976.896	0.854333	1.27509	3.21951	0.596922	0.150353	0.432692	5.98e-07	7	181	s
1042	75	26	4.46934	0.854769	2.96553	5.82651	273.471	936.134	12.2491	0.73332	-0.186957	0.0389739	2.5873	0.580573	4.08433	0.50775	30.1667	855.624	1.08275	1.51699	2.5873	0.592269	0.138646	0.449749	0.0420658	5.93878	0.0277844	4.05425	0.336088	29.6122	826.141	0.979	1.46578	5.93878	0.702998	0.0905659	0.360294	6.99e-07	8	745	s
1043	47	24	3.38534	0.733308	2.01082	4.39243	565.471	937.251	8.66271	0.479802	-0.750632	0.126168	1.37762	0.415133	2.17772	0.638462	33.5874	1078.25	0.8015	1.11058	1.37762	0.497989	0.0906885	0.316427	0.16	1.8	-0.196172	1.7524	0.532	33.48	1080.75	0.623646	0.840387	1.8	0.474258	0.0607378	0.226452	5.95e-07	10	181	s
1044	747	120	15.3296	3.43784	7.22325	22.0837	51.616	18.4031	38.5682	0.667952	1.51866	0.0536592	1.33945	0.708556	3.29794	0.640575	28.3326	752.537	1.0437	1.40176	1.33945	0.484447	0.204094	0.522337	0.0455249	2.40775	0.472874	3.28385	0.548656	28.2775	750.563	1.00417	1.48	2.40775	0.58714	0.0975507	0.375261	9.73e-06	6	28341	c
1045	344	72	10.2087	1.97126	6.91774	15.15	113.631	11.6536	25.3547	0.644331	-0.709317	0.054357	2.06886	0.604931	3.61835	0.58588	27.1257	688.312	1.05067	1.46374	2.06886	0.562197	0.149111	0.458362	0.0435655	4.24306	0.300245	4.03182	0.490144	27.2847	697.209	1.02973	1.54861	4.24306	0.682668	0.0764962	0.340426	1.31e-05	9	28341	c
1046	152	41	6.55429	1.28329	3.63644	8.88019	143.585	9.72109	18.0077	0.738037	0.526545	0.0286551	2.50187	0.697313	5.13275	0.521036	27.375	700.862	1.16751	1.63832	2.50187	0.584673	0.194297	0.54509	0.033078	5.3945	0.304542	4.87838	0.403204	26.5505	659.024	1.07684	1.59474	5.3945	0.724168	0.0762275	0.344558	1.48e-05	8	28341	c
1047	85	35	4.71143	1.23024	1.99366	6.52493	157.39	7.16461	13.4086	0.775752	-0.0889793	0.106594	1.3705	0.563595	2.57022	0.647122	32.8813	1027.87	0.897519	1.21667	1.3705	0.496003	0.157879	0.433865	0.155352	2.46939	-0.266204	1.97511	0.625219	33.449	1075.31	0.678942	0.984988	2.46939	0.553966	0.136049	0.365962	1.43e-05	6	28341	c
1048	235	59	8.51331	2.27026	3.50253	12.4729	169.306	15.6543	24.6801	0.820919	1.45895	0.0393635	1.85167	0.683235	3.92279	0.590549	28.9139	783.286	1.10296	1.51743	1.85167	0.53817	0.192997	0.526165	0.0373331	3.26738	0.433947	3.88611	0.503242	28.8503	781.086	1.05083	1.53205	3.26738	0.649565	0.115473	0.413737	1.68e-05	6	28341	c
1049	248	67	8.94438	2.61349	3.2027	13.6367	77.6417	22.1429	27.2844	0.853301	1.21952	0.0374909	1.92379	0.672538	3.93742	0.557818	27.97	731.975	1.09714	1.53409	1.92379	0.542915	0.165566	0.491816	0.0352197	3.46429	0.328386	3.57908	0.469824	27.9949	735.384	1.00357	1.52499	3.46429	0.652681	0.0560292	0.290092	1.32e-05	10	28341	c
1050	537	85	12.9987	3.32233	7.4563	20.0223	98.1268	29.4475	37.3812	0.85247	1.54076	0.0473006	1.73885	0.608715	3.22197	0.593538	29.5143	818.152	1.03617	1.45673	1.73885	0.528362	0.13859	0.441594	0.0385263	3.03368	0.314746	3.21355	0.488151	29.5053	819.061	0.987894	1.51346	3.03368	0.625589	0.0433948	0.254812	1.66e-05	11	28341	c
1051	110	32	5.72227	1.31835	3.31927	7.77529	182.341	15.4055	16.2715	0.827805	-0.908921	0.032178	3.37632	0.552344	4.77111	0.477897	26.7711	669.729	1.11913	1.63272	3.37632	0.644201	0.119003	0.432027	0.0410914	5.44872	0.0777705	3.9541	0.395446	26.6026	663.088	0.976013	1.50785	5.44872	0.727336	0.0633852	0.306576	1.57e-05	6	28341	c
1052	80	26	4.64096	0.51164	3.52023	5.37871	202.089	21.9776	11.1531	0.53152	-0.421996	0.0588908	2.14022	0.407405	2.8058	0.54348	29.845	839.946	0.951016	1.3989	2.14022	0.552076	0.0971474	0.364836	0.0710744	4.74545	-0.0158876	3.33562	0.437747	29.9455	850.109	0.86777	1.26881	4.74545	0.697478	0.094607	0.34407	1.49e-05	8	28341	c
1053	274	61	9.15063	2.03753	5.65393	14.08	156.869	30.8068	23.9668	0.69638	-0.370983	0.0478175	2.22312	0.639864	4.08651	0.588673	28.0832	739.945	1.06795	1.48509	2.22312	0.575996	0.171681	0.493342	0.0365702	4.18182	0.359327	4.26362	0.455206	28.0091	735.782	1.04784	1.5585	4.18182	0.691071	0.0896387	0.368869	2.02e-05	10	28341	c
1054	595	102	13.3911	1.98064	8.77716	17.7769	29.0024	36.2765	31.6435	0.552421	-0.872211	0.066628	1.69395	0.667926	3.55056	0.634464	25.8358	623.551	1.03578	1.4179	1.69395	0.531473	0.178201	0.492176	0.0702564	3.18489	0.288274	3.23744	0.546181	25.6262	614.788	0.947853	1.43313	3.18489	0.644821	0.04353	0.248558	1.13e-05	8	28341	c
1055	166	42	6.80154	0.924795	4.69072	8.46578	120.845	30.3762	16.3725	0.436191	-1.16348	0.0359379	4.00508	0.633762	6.46787	0.521754	24.4763	560.703	1.17741	1.66432	4.00508	0.674087	0.173585	0.520771	0.0305026	6.78689	0.341675	6.15466	0.427882	24.0656	540.865	1.10837	1.63414	6.78689	0.755768	0.164895	0.504462	1.84e-05	12	181	c
1056	285	83	8.73468	2.74857	0.355779	12.2334	216.18	32.9074	24.3653	0.658324	0.527881	0.0543465	1.51111	0.678317	3.34876	0.62857	31.0949	911.243	1.03901	1.41712	1.51111	0.507219	0.185007	0.500913	0.0534551	1.96759	0.475942	2.87727	0.560623	31.0972	913.459	0.965554	1.38057	1.96759	0.541134	0.10516	0.376928	1.52e-05	11	28341	c
1057	552	122	12.5264	3.52782	5.26171	19.9523	193.158	41.4403	34.033	0.654027	-1.29618	0.0351382	2.18976	0.613733	3.83452	0.552078	28.8936	782.284	1.08826	1.56031	2.18976	0.569747	0.135114	0.449842	0.0356552	3.49123	0.350064	3.68583	0.479637	28.8947	783.345	1.03629	1.57044	3.49123	0.651866	0.06533	0.317223	1.98e-05	11	28341	c
1058	216	62	7.87787	1.6511	4.60401	10.9693	150.394	45.6919	19.155	0.475069	-0.729859	0.0332895	2.2325	0.729084	5.12027	0.552689	30.967	902.796	1.15847	1.59871	2.2325	0.570966	0.197994	0.544277	0.0300259	4.79012	0.443604	5.3046	0.41435	31.0617	909.903	1.10385	1.63644	4.79012	0.6942	0.110101	0.416647	2.16e-05	11	28341	c
1059	148	53	6.41116	2.24375	0.773585	9.97612	233.846	43.1216	19.453	0.779338	-0.15361	0.0378349	2.42742	0.785134	6.64867	0.566074	29.2419	810.097	1.13625	1.55076	2.42742	0.589403	0.228341	0.574026	0.039314	5.97345	0.555166	7.71425	0.481029	29.354	817.936	1.12186	1.52508	5.97345	0.714883	0.140895	0.454299	1.41e-05	9	28341	c
1060	329	66	10.2068	2.07727	6.47539	14.5495	172.143	49.8126	27.3983	0.803816	-0.995671	0.0455521	1.84545	0.590599	3.25384	0.588904	29.0685	792.917	1.03732	1.46514	1.84545	0.545807	0.128248	0.426502	0.0432325	3.20225	0.28657	3.24426	0.484296	28.8052	779.957	0.981112	1.48638	3.20225	0.626206	0.0623833	0.302114	2.16e-05	10	28341	c
1061	263	64	9.35249	3.14792	4.48571	15.1378	114.129	48.1496	29.2394	0.884072	-0.34789	0.0575368	1.46745	0.676312	3.26677	0.620712	29.4397	814.743	1.02943	1.3896	1.46745	0.497841	0.193838	0.507834	0.043805	3.38164	0.324564	3.5033	0.482261	29.43	815.987	0.980786	1.48545	3.38164	0.630485	0.0989365	0.378489	2.04e-05	16	28341	c
1062	107	34	5.40933	1.25698	2.29713	7.22213	51.0524	47.6345	15.0197	0.764657	-0.58849	0.0547754	1.61475	0.592584	2.9817	0.58568	29.0464	792.394	1.0093	1.40181	1.61475	0.513119	0.145208	0.443927	0.0491523	3.93902	0.166727	3.36359	0.413315	29.1829	802.228	0.95682	1.41625	3.93902	0.641667	0.0638609	0.298655	1.68e-05	13	28341	c
1063	675	120	14.9058	4.17754	7.43632	23.658	208.506	60.2634	42.4223	0.836835	-1.10427	0.0588705	1.21116	0.700606	3.02269	0.646267	28.1746	743.883	1.02683	1.37298	1.21116	0.470989	0.198756	0.511274	0.0439698	2.37522	0.419377	3.0454	0.517684	28.0654	738.764	0.992206	1.47809	2.37522	0.57639	0.0682278	0.31487	1.95e-05	13	28341	c
1064	102	30	5.28593	0.622775	4.12364	6.48622	11.425	48.886	13.0337	0.601137	-1.42918	0.0962116	1.21875	0.62837	2.63974	0.659141	30.1222	857.784	0.925521	1.18251	1.21875	0.477454	0.19853	0.478997	0.133795	1.37681	0.407779	2.16241	0.642029	29.8696	850.69	0.759127	1.03632	1.37681	0.499119	0.127067	0.362184	9.99e-06	6	28341	c
1065	345	92	9.96433	2.89093	3.55795	15.4964	94.4753	56.4446	29.2061	0.78032	0.217707	0.0442612	1.91186	0.674279	3.93482	0.605468	29.9267	840.693	1.10196	1.52686	1.91186	0.550245	0.185429	0.517745	0.0390747	3.52612	0.377053	3.83019	0.471781	30.0112	847.087	1.04066	1.55765	3.52612	0.656062	0.0797216	0.348309	2.04e-05	14	28341	c
1066	218	50	7.9562	1.22039	5.86256	10.8595	243.817	54.5402	19.2665	0.529247	1.23548	0.0442787	1.88363	0.711286	4.26211	0.598418	27.1138	688.417	1.08974	1.49766	1.88363	0.548933	0.193909	0.524408	0.0392129	2.9661	0.457975	3.73613	0.472268	26.8531	674.514	1.03577	1.49276	2.9661	0.603714	0.10054	0.382325	1.39e-05	8	28341	c
1067	227	65	8.98605	2.70196	3.31841	14.5791	68.8205	55.6596	26.1751	0.880314	-0.16158	0.0317614	2.66918	0.644648	4.75568	0.502421	28.8126	778.909	1.12584	1.62844	2.66918	0.596855	0.137195	0.46181	0.0282653	4.86188	0.266579	4.31452	0.38875	28.7735	777.009	1.04961	1.65165	4.86188	0.693047	0.0689194	0.33348	1.95e-05	14	28341	c
1068	310	76	10.3831	3.08306	5.44365	17.0834	231.301	66.1857	30.7475	0.84983	1.45431	0.0639107	1.06312	0.725145	2.93396	0.673521	29.1749	799.914	1.01039	1.32514	1.06312	0.450892	0.224819	0.53397	0.0546181	1.74583	0.572375	3.04132	0.58973	29.0375	792.953	0.992285	1.37078	1.74583	0.5297	0.138026	0.428845	1.69e-05	11	28341	c
1069	493	90	12.3217	3.15524	5.60346	18.2957	126.587	66.0014	34.9907	0.801289	-0.753302	0.0271795	2.22795	0.826352	7.41515	0.578513	29.2119	806.15	1.23478	1.68865	2.22795	0.572891	0.258057	0.627428	0.02117	5	0.630531	7.76647	0.459418	29.188	804.592	1.21428	1.79402	5	0.70574	0.164207	0.52396	2.24e-05	12	28341	c
1070	128	52	6.56832	2.15012	2.09015	10.3582	74.6856	66.303	20.7366	0.884018	-0.610543	0.023849	4.72488	0.586004	6.70643	0.441325	29.8923	842	1.18871	1.74836	4.72488	0.715638	0.113774	0.436071	0.023517	7.77011	0.214646	5.94689	0.29517	29.4483	814.973	1.11181	1.71308	7.77011	0.75446	0.10711	0.419805	2.08e-05	13	28341	c
1071	335	86	10.6686	3.58344	0.779417	16.2489	174.698	73.2157	32.1765	0.796583	-1.4746	0.054096	1.50589	0.733442	3.8247	0.647109	27.5295	709.146	1.08418	1.42913	1.50589	0.517639	0.240472	0.568658	0.0483454	2.44867	0.548308	3.71055	0.543547	27.2091	693.107	1.04209	1.44446	2.44867	0.596943	0.147723	0.453632	2.25e-05	6	28341	c
1072	380	79	10.8387	2.89046	4.86045	15.5112	46.2214	70.5181	30.2518	0.787325	-0.177448	0.0207509	2.91185	0.772715	7.40571	0.523341	29.2312	804.946	1.26275	1.77901	2.91185	0.62116	0.207393	0.580893	0.0156513	7.46032	0.463687	7.95519	0.368328	29.1048	797.008	1.23636	1.89475	7.46032	0.789014	0.086371	0.396498	1.87e-05	11	28341	c
1073	281	56	9.08331	1.21767	7.07183	11.5547	155.666	71.1847	22.7969	0.668831	-0.952013	0.0426433	1.3783	0.807849	4.5865	0.617179	29.9941	846.02	1.13148	1.48721	1.3783	0.488472	0.275939	0.615447	0.0284631	2.96121	0.582178	4.54362	0.479008	29.7974	835.084	1.09427	1.61582	2.96121	0.614285	0.143642	0.470367	2.34e-05	9	28341	c
1074	378	67	10.76	2.25938	6.56408	14.3583	260.306	73.8231	30.2638	0.812925	1.03504	0.0580387	1.48526	0.816523	5.04754	0.641667	26.4184	655.651	1.1015	1.44961	1.48526	0.512618	0.275162	0.608522	0.0522646	3.68634	0.55714	5.16196	0.517334	26.1708	643.047	1.0693	1.54472	3.68634	0.670187	0.134735	0.44723	1.26e-05	8	28341	c
1075	135	51	6.36357	1.7242	2.64996	10.2356	192.77	72.6045	16.4451	0.652719	-1.02011	0.0785586	1.16258	0.610613	2.49284	0.677322	30.3742	872.737	0.913546	1.22456	1.16258	0.472497	0.169696	0.450704	0.0628	2.29	0.238178	2.50298	0.524176	30.41	875.672	0.881206	1.2845	2.29	0.571967	0.0394492	0.224453	2.09e-05	10	28341	c
1076	155	41	6.6593	1.31841	4.3492	9.13388	19.8275	71.9024	19.0346	0.79509	1.45043	0.0458576	3.29068	0.665212	5.91457	0.541061	25.9269	630.889	1.13732	1.58655	3.29068	0.639595	0.173805	0.510548	0.0493762	4.27826	0.420714	4.6927	0.456004	25.2696	599.061	1.00914	1.48066	4.27826	0.66605	0.161364	0.478401	1.3e-05	7	166	c
1077	73	42	4.74872	1.24383	2.32944	7.60311	142.071	69.2345	11.6084	0.292784	0.950246	0.0732989	1.76526	0.438892	2.57301	0.57868	32.2723	988.116	0.910071	1.26817	1.76526	0.533489	0.086297	0.328749	0.0882964	3.44737	-0.255327	2.3731	0.468885	31.8158	967.041	0.751409	1.20845	3.44737	0.643859	0.106744	0.356919	2.32e-05	11	28341	c
1078	241	70	8.65909	1.9722	5.56666	13.0061	33.5504	81.5952	23.1609	0.729809	0.024413	0.0593236	1.52169	0.581532	2.81816	0.614249	32.8108	1018.7	0.984039	1.37018	1.52169	0.503489	0.135595	0.425086	0.0536445	2.30601	0.321007	2.69811	0.512761	32.8525	1024.54	0.914131	1.36457	2.30601	0.565227	0.0798682	0.327587	1.58e-05	11	28341	c
1079	212	49	7.89852	1.29613	5.09849	10.0982	71.234	82.496	20.3836	0.691023	-1.04109	0.0348744	2.0751	0.732484	4.87845	0.561487	29.0053	789.349	1.1501	1.58259	2.0751	0.559203	0.212976	0.560568	0.0340447	3.93567	0.418198	4.38231	0.459654	28.9064	784.541	1.06856	1.55675	3.93567	0.66122	0.113103	0.412609	2.13e-05	10	28341	c
1080	122	61	6.67547	2.32979	2.95492	11.4974	114.037	82.4865	18.8372	0.794093	1.213	0.103626	0.973615	0.498689	1.97107	0.690501	34.2612	1120.43	0.831931	1.12941	0.973615	0.440543	0.128311	0.378755	0.0920027	1.68657	0.170983	2.01721	0.586567	34.2836	1126.28	0.758989	1.1396	1.68657	0.524854	0.110014	0.352486	2.25e-05	11	28341	c
1081	371	74	10.7927	2.45212	6.52473	16.5179	130.1	85.6864	29.285	0.781392	-0.771616	0.0547787	1.43578	0.639406	2.99086	0.620453	31.6808	946.796	1.01698	1.40072	1.43578	0.499462	0.162852	0.468934	0.053613	2.28617	0.45721	3.10595	0.554048	31.6495	945.743	0.996541	1.44135	2.28617	0.578669	0.0973449	0.370305	2.33e-05	9	28341	c
1082	294	71	9.14202	2.10915	4.39466	13.1894	232.717	83.9244	25.4987	0.771979	0.160249	0.0789212	0.940171	0.618642	2.23266	0.676923	30.0057	850.779	0.906065	1.20149	0.940171	0.426184	0.165389	0.441326	0.0538415	2.19313	0.235759	2.43484	0.519642	29.9442	848.177	0.881677	1.34077	2.19313	0.558929	0.0355096	0.21752	1.63e-05	9	28341	c
1083	658	125	14.6497	4.80463	6.85847	24.4411	292.697	95.8463	43.4577	0.818038	-0.729322	0.048048	1.79809	0.619466	3.36259	0.593495	27.7301	719.532	1.04902	1.47328	1.79809	0.538655	0.147515	0.457321	0.0381271	3.10912	0.341559	3.36097	0.470789	27.8068	724.62	1.00596	1.53919	3.10912	0.621567	0.0515085	0.279561	1.07e-05	4	28341	c
1084	410	94	11.1479	2.5506	5.09744	16.2319	271.781	95.2577	29.8922	0.777111	-1.12829	0.123622	0.773098	0.555293	1.86922	0.728013	31.5041	944.337	0.818035	1.07217	0.773098	0.40355	0.152955	0.403363	0.111837	1.16216	0.288754	1.81699	0.659512	31.4925	946.005	0.76955	1.10546	1.16216	0.466125	0.0581471	0.253101	1.28e-05	7	28341	c
1085	92	33	5.10928	1.38928	2.85428	7.38928	47.1268	88.9074	15.3692	0.850471	-0.117757	0.0364464	2.90323	0.539741	4.1539	0.508843	30.129	853.12	1.08755	1.54903	2.90323	0.613322	0.138576	0.453844	0.0455556	3.25	0.393641	3.67993	0.445588	30.2167	861.561	0.99183	1.4236	3.25	0.605922	0.150475	0.454721	1.81e-05	9	28341	c
1086	577	103	13.342	3.49989	7.18096	21.3885	114.178	107.453	39.4013	0.850382	1.49308	0.0419687	1.59615	0.739096	4.05889	0.624192	29.1703	798.423	1.10279	1.49534	1.59615	0.518189	0.217249	0.552648	0.0350222	2.86307	0.493673	3.82729	0.521	28.8797	782.458	1.05861	1.54974	2.86307	0.608269	0.108656	0.403869	2.15e-05	9	28341	c
1087	187	48	7.5089	2.13876	2.51256	10.717	174.775	95.8865	21.7085	0.812153	-0.707271	0.104141	0.976672	0.374314	1.78048	0.660964	26.4541	661.34	0.779325	1.08534	0.976672	0.427208	0.0617186	0.258426	0.119476	1.24219	-0.0101501	1.61485	0.622656	26.4609	667.505	0.648391	0.987524	1.24219	0.467192	0.0070916	0.0836864	2.29e-05	6	28341	c
1088	66	24	4.26215	0.956014	2.69323	5.88814	152.538	93.2435	12.274	0.821366	-0.500443	0.102582	1.49309	0.211617	1.94693	0.618433	25.2258	599.539	0.787215	1.16822	1.49309	0.510144	0.0360305	0.204837	0.177531	0.977778	0.112108	1.55062	0.644444	25.5556	621.902	0.642163	0.868636	0.977778	0.411305	0.0944686	0.287267	2.39e-05	7	28341	c
1089	404	79	11.8989	3.93371	4.65028	18.5913	197.756	107.917	38.3298	0.911672	-1.07104	0.0308287	2.0027	0.808323	6.22417	0.594119	26.549	661.265	1.20399	1.62325	2.0027	0.553659	0.261362	0.621424	0.027213	4.17576	0.575399	5.91727	0.461506	26.2	642.511	1.15969	1.70643	4.17576	0.689485	0.141756	0.478767	2.02e-05	6	28341	c
1090	292	67	10.0933	3.34976	4.27533	15.9798	219.454	100.401	32.3195	0.90981	-0.639569	0.0407337	1.92388	0.682686	4.03151	0.59505	27.1589	689.143	1.1024	1.5245	1.92388	0.55193	0.18241	0.513427	0.0303757	4.31064	0.352038	4.32631	0.439426	27.034	683.263	1.06736	1.63972	4.31064	0.682753	0.0619578	0.315488	1.74e-05	7	28341	c
1091	178	69	7.03567	2.40683	2.15942	11.4498	69.8646	102.185	23.9124	0.853761	1.45598	0.0205381	4.11765	0.776225	10.2004	0.490934	26.2689	656.225	1.29811	1.8246	4.11765	0.680609	0.216875	0.598691	0.0302566	8.90698	0.551992	10.9406	0.383663	26.0698	647.346	1.24054	1.66582	8.90698	0.814824	0.184373	0.535755	2.02e-05	8	28341	c
1092	84	37	4.73137	1.36793	1.92063	7.23446	314.06	98.6999	13.6373	0.74965	-0.243582	0.0650558	1.67658	0.359174	2.30814	0.55375	30.197	863.257	0.876374	1.27683	1.67658	0.502254	0.0739091	0.30552	0.112958	2.47368	-0.0769849	2.14843	0.478947	30.0526	863.307	0.706638	1.03642	2.47368	0.551637	0.073911	0.276516	7.93e-06	3	28341	c
1093	113	44	6.17206	2.78095	1.65535	11.0068	92.6709	105.925	23.5448	0.957383	-1.23979	0.124465	0.851752	0.275319	1.58767	0.680863	27.8976	741.882	0.687602	0.951475	0.851752	0.403025	0.0405688	0.196554	0.121938	1.70588	-0.164439	1.73249	0.612941	28.1059	756.05	0.631791	1.00743	1.70588	0.527469	0.0639039	0.253655	2.12e-05	7	28341	c
1094	247	76	9.47626	3.13822	2.21467	15.454	142.88	110.97	28.3817	0.862369	-1.38975	0.042951	2.31067	0.756017	5.7353	0.579185	27.0141	685.709	1.14752	1.57689	2.31067	0.586752	0.218009	0.565788	0.034409	4.3743	0.510428	5.46747	0.485818	26.6983	667.839	1.11818	1.64334	4.3743	0.698801	0.112051	0.420975	2.27e-05	8	28341	c
1095	141	38	6.31436	1.82892	2.44836	9.21639	83.7701	105.783	19.1965	0.855893	-1.24038	0.114791	0.816701	0.433705	1.72109	0.694297	27.334	708.258	0.759761	1.02465	0.816701	0.402827	0.0910044	0.305077	0.0944481	1.39806	0.167209	1.83938	0.603883	27.1068	696.775	0.747442	1.10701	1.39806	0.480826	0.0310479	0.185229	2.09e-05	7	28341	c
1096	108	44	5.6713	1.22541	3.22183	8.18081	158.023	107.3	15.2219	0.711186	-0.407527	0.0289907	3.46176	0.554889	4.88864	0.502311	26.221	641.324	1.13649	1.67015	3.46176	0.639378	0.143731	0.477387	0.0583599	4.09589	0.448848	4.71575	0.462896	25	584.652	1.0441	1.46051	4.09589	0.686563	0.130147	0.428923	2.33e-05	7	28341	c
1097	56	24	3.86664	1.27154	1.375	6.01171	182.463	106.611	12.2094	0.832675	1.55811	0.132597	0.856322	0.29925	1.611	0.682184	27.2241	705.149	0.699412	0.965406	0.856322	0.405554	0.0622988	0.245336	0.256657	0.576923	-0.155556	1.24963	0.711538	26.9615	704.744	0.422468	0.59614	0.576923	0.29587	0.017551	0.102469	2.2e-05	6	28341	c
1098	232	63	8.25657	2.93893	2.94144	13.5951	49.9209	114.215	28.3559	0.894767	-1.16837	0.0381707	1.83966	0.73563	4.47933	0.579991	27.3329	698.619	1.13099	1.54917	1.83966	0.543079	0.211642	0.554042	0.0412415	3.22024	0.453337	3.94536	0.496947	26.9345	678.536	1.05065	1.49407	3.22024	0.626747	0.151125	0.465518	1.48e-05	6	28341	c
1099	97	35	5.16365	1.10785	2.6717	7.107	67.2602	118.576	13.5704	0.631389	1.30406	0.0273062	2.97531	0.720495	6.32246	0.490727	23.9198	535.142	1.18591	1.65351	2.97531	0.602316	0.197616	0.551476	0.0319527	5.78462	0.30509	5.16213	0.355306	23.5385	514.87	1.08839	1.56211	5.78462	0.721308	0.0990085	0.387516	1.72e-05	8	28341	c
1100	255	73	9.80747	3.54084	2.62274	15.3146	160.963	127.526	32.6192	0.919259	-0.917439	0.0299482	1.7973	0.795207	5.38809	0.579014	27.5788	711.766	1.19682	1.62232	1.7973	0.531675	0.246106	0.604759	0.0202367	4.44103	0.524896	5.67374	0.399419	27.2205	692.78	1.17198	1.7624	4.44103	0.682113	0.0973726	0.406272	2.18e-05	7	28341	c
1101	191	55	7.36724	1.9476	3.76873	11.1128	292.679	123.298	21.1951	0.807943	-0.748315	0.123249	0.793985	0.44379	1.71375	0.709474	33.3925	1066.75	0.762969	1.01566	0.793985	0.403641	0.0948953	0.310212	0.112083	1.45578	0.0199389	1.7427	0.614966	33.483	1076.15	0.701292	1.06788	1.45578	0.502174	0.00416694	0.0667021	1.35e-05	9	1625	c
1102	254	68	7.95236	2.53958	1.58633	12.5576	97.3439	128.748	22.0507	0.684437	1.48955	0.111789	0.940782	0.532932	2.00711	0.695866	31.0413	915.661	0.832511	1.1188	0.940782	0.43775	0.127701	0.376219	0.0891159	1.62944	0.198502	2.0165	0.585876	31	915.446	0.783955	1.15469	1.62944	0.513842	0.045865	0.229696	1.79e-05	13	28341	c
1103	315	65	9.41651	1.37932	5.39621	11.8748	264.994	126.071	21.7373	0.348371	-1.46055	0.0383217	2.07835	0.661425	4.06925	0.560909	30.8917	899.062	1.07792	1.51539	2.07835	0.562552	0.155359	0.47464	0.0408805	4.13971	0.348956	4.17928	0.447267	30.9412	902.562	1.04161	1.5406	4.13971	0.685264	0.0643878	0.312118	1.67e-05	9	28341	c
1104	264	59	8.6639	1.60481	4.99885	11.7064	222.057	131.038	22.1125	0.590104	1.36284	0.0367446	2.63351	0.8181	8.23888	0.581196	25.4419	612.735	1.22593	1.63961	2.63351	0.591047	0.266618	0.629385	0.0260525	5.54545	0.628104	8.45565	0.448281	24.9809	588.481	1.22789	1.74817	5.54545	0.724017	0.159268	0.510926	1.86e-05	11	575	c
1105	532	120	12.9671	3.82657	4.82292	21.3126	128.186	142.345	33.2453	0.540697	-0.884649	0.0404175	1.82267	0.636059	3.50407	0.581248	29.4264	813.193	1.0539	1.47694	1.82267	0.535327	0.150982	0.462943	0.0379658	3.12332	0.313621	3.27522	0.462771	29.5583	822.135	0.989826	1.5211	3.12332	0.616858	0.0527675	0.281306	1.92e-05	14	28341	c
1106	187	56	8.03801	2.68692	3.59457	13.3253	197.357	132.641	25.8479	0.914424	-0.875516	0.0453251	2.01546	0.605948	3.55735	0.559479	28.3184	751.42	1.05658	1.47392	2.01546	0.549345	0.151268	0.462942	0.0349794	4.06667	0.296424	3.89	0.445078	28.2	746.493	1.01546	1.55708	4.06667	0.677117	0.0934593	0.376266	1.97e-05	9	28341	c
1107	176	46	7.16967	0.914804	5.04957	9.28874	142.578	133.947	16.4899	0.445119	-0.172258	0.0667759	1.70915	0.56641	2.97093	0.613413	28.0719	739.646	0.98922	1.37558	1.70915	0.532512	0.134747	0.424548	0.0741112	2.91608	0.21648	2.86089	0.564056	28.2587	752.377	0.911902	1.33456	2.91608	0.626135	0.0788192	0.322058	2.06e-05	11	28341	c
1108	247	60	9.01905	2.51939	4.88973	14.1495	169.379	135.862	26.6161	0.878959	-0.98887	0.0522662	2.5802	0.333285	2.93501	0.539035	28.3641	756.125	0.960315	1.44448	2.5802	0.596672	0.0736727	0.323425	0.0503272	4.20488	0.125683	3.40466	0.442074	28.3707	756.725	0.960676	1.45344	4.20488	0.688955	0.0580881	0.288583	2.09e-05	6	28341	c
1109	574	84	12.9876	1.61658	8.13465	15.6937	59.0539	138.838	28.9657	0.343175	1.16429	0.050752	1.47029	0.677444	3.27912	0.63467	27.1352	688.041	1.05085	1.43064	1.47029	0.507779	0.188638	0.507624	0.0425933	2.61667	0.403012	3.19156	0.527927	27.0208	683.465	0.995547	1.49874	2.61667	0.59908	0.0757885	0.333704	1.17e-05	8	28341	c
1110	124	38	5.93566	1.32572	3.27428	8.05474	244.642	132.077	16.8689	0.807249	-0.561009	0.0317695	2.69555	0.570796	4.14018	0.494299	30.1241	853.472	1.07921	1.57162	2.69555	0.595777	0.114734	0.417264	0.0306689	6.17045	0.168388	4.70994	0.370936	29.9659	846.197	1.02583	1.61558	6.17045	0.749972	0.092829	0.381483	1.82e-05	10	575	c
1111	262	59	9.10633	2.517	5.37355	13.6355	319.286	141.641	27.3512	0.869182	-0.224527	0.0318507	3.01905	0.668857	5.55853	0.556224	26.054	634.805	1.1624	1.65135	3.01905	0.621256	0.187656	0.538175	0.0304723	4.96714	0.464969	5.64191	0.471098	25.7934	622.028	1.1271	1.65559	4.96714	0.714292	0.133871	0.459816	1e-05	5	1625	c
1112	83	32	5.06556	1.51304	2.27503	7.57798	234.251	142.245	15.5089	0.886469	-0.886316	0.084721	1.58088	0.277382	2.09386	0.617777	32.1471	983.613	0.829039	1.21525	1.58088	0.515124	0.0516718	0.249851	0.0803729	2.61905	-0.0811795	2.2112	0.507283	32.1111	984.308	0.77292	1.17135	2.61905	0.598824	0.047922	0.236409	1.86e-05	10	575	c
1113	326	69	10.3507	2.652	5.12499	15.6053	280.774	146.892	28.4257	0.803772	-0.186103	0.0542324	1.59338	0.540952	2.73553	0.607006	31.2334	921.95	0.958029	1.34941	1.59338	0.520948	0.116523	0.392137	0.0556047	2.38951	0.159872	2.42211	0.536363	31.0262	912.772	0.868753	1.34782	2.38951	0.585768	0.024009	0.179506	1.72e-05	13	1127	c
1114	535	98	12.2522	2.80801	6.17253	17.6015	192.621	153.278	33.1609	0.713915	-0.0112912	0.0466813	1.2098	0.783509	3.79411	0.654272	30.6677	885.265	1.08225	1.41649	1.2098	0.471827	0.262069	0.589631	0.0337832	2.59825	0.557654	3.9369	0.516155	30.5677	879.841	1.0602	1.53568	2.59825	0.592818	0.121951	0.425217	1.81e-05	10	28341	c
1115	114	34	5.5777	0.865543	3.97331	7.10585	248.892	147.058	14.004	0.543984	0.954044	0.0292229	3.55696	0.582165	5.25642	0.498668	25.2127	592.325	1.15323	1.65844	3.55696	0.652145	0.16899	0.513523	0.0282372	7.70652	0.281246	6.36103	0.347361	25.6848	617.082	1.12172	1.67119	7.70652	0.769175	0.169274	0.515608	1.86e-05	12	1127	c
1116	218	48	7.93701	0.809818	6.58709	9.79871	159.848	153.482	18.3496	0.438522	-1.40952	0.0348902	2.08906	0.797719	6.16375	0.589621	26.3588	651.902	1.19261	1.61098	2.08906	0.56196	0.257719	0.615716	0.0508245	4.22286	0.562444	5.82551	0.488186	26.4286	655.929	1.11356	1.56352	4.22286	0.691131	0.14522	0.466008	1.97e-05	12	28341	c
1117	303	68	10.1521	3.8357	2.50017	16.4035	311.488	161.048	33.4562	0.932316	-0.586543	0.10186	0.969641	0.47849	1.92965	0.677461	33.6651	1081.53	0.820293	1.12464	0.969641	0.434833	0.100541	0.335027	0.0953549	1.45528	0.201965	1.91179	0.604065	33.7236	1087.82	0.774651	1.14374	1.45528	0.496652	0.0434977	0.222676	1.11e-05	7	345	c
1118	293	72	9.69268	2.87051	4.51613	15.5396	268.222	163.416	29.4351	0.846657	0.477268	0.0231867	3.68038	0.740322	8.08642	0.502387	26.5014	661.742	1.26105	1.78612	3.68038	0.658834	0.188078	0.556613	0.0260847	6.91364	0.427761	7.04086	0.39603	25.7136	619.27	1.17754	1.70733	6.91364	0.781528	0.113126	0.430264	1.66e-05	12	1127	c
1119	448	100	10.708	3.1974	2.25488	15.886	237.15	168.417	30.3846	0.672771	0.818364	0.0472569	1.90774	0.701448	4.19498	0.595954	31.1981	918.076	1.07831	1.51169	1.90774	0.550453	0.172044	0.497646	0.0352776	4.19189	0.401377	4.50128	0.493561	31.2946	923.897	1.06077	1.61341	4.19189	0.685538	0.0932729	0.382127	1.51e-05	12	627	c
1120	42	18	3.38995	0.750885	2.12132	4.30116	292.445	159.559	9.82025	0.831109	-0.787786	0.0984562	1.14394	0.351668	1.88222	0.62803	33.9621	1103.05	0.785871	1.11723	1.14394	0.445247	0.0837327	0.304994	0.152355	1.05263	-0.117647	1.47091	0.6	33.8947	1113.27	0.541558	0.850664	1.05263	0.381539	0.0743258	0.252105	1.49e-05	10	1625	c
1121	82	33	4.84689	1.72777	2.16195	7.44524	76.1669	159.857	16.4823	0.918511	0.138593	0.106543	0.907407	0.439927	1.81008	0.666296	35.1074	1180.13	0.788347	1.07458	0.907407	0.407833	0.0933645	0.316057	0.0990083	1.52727	-0.0248447	1.74512	0.563636	35.2364	1195.3	0.684266	1.07524	1.52727	0.475823	0.0188065	0.14215	1.28e-05	9	28341	c
1122	727	110	15.0484	3.8757	7.87559	22.2434	96.5004	178.159	42.9832	0.819502	1.53994	0.0434435	1.2	0.806893	4.10709	0.650632	30.2748	861.127	1.12174	1.46148	1.2	0.469623	0.273857	0.609155	0.0321341	2.31034	0.645411	4.25778	0.537006	30.2445	859.335	1.11353	1.58647	2.31034	0.578802	0.145665	0.469693	1.47e-05	10	28341	c
1123	236	83	8.20648	2.87745	1.6319	13.2042	144.751	167.749	25.3948	0.826939	-1.50301	0.0277977	3.14856	0.743737	7.14323	0.52198	28.1623	747.599	1.21467	1.70504	3.14856	0.627726	0.194072	0.55391	0.0326769	6.58659	0.502713	7.62252	0.413581	27.9609	738.747	1.14964	1.6484	6.58659	0.771929	0.120915	0.437206	1.93e-05	12	28341	c
1124	83	28	4.86171	0.880789	2.91219	6.63181	111.609	162.97	12.2807	0.671424	-0.923517	0.133876	0.798561	0.359673	1.62356	0.7	25.6906	624.984	0.724907	0.990123	0.798561	0.399994	0.0678423	0.259169	0.0912397	1.52727	0.176177	1.92694	0.563636	26.0364	640.536	0.770667	1.14641	1.52727	0.481483	0.0614904	0.264854	1.8e-05	12	28341	c
1125	272	80	8.08373	2.81649	0.288585	11.88	193.419	171.134	23.4855	0.660831	0.269238	0.0601449	1.53692	0.59948	2.91866	0.624793	31.4314	932.782	0.990607	1.38121	1.53692	0.512712	0.145428	0.441319	0.0536365	3.2602	0.263459	3.21319	0.507998	31.4337	934.618	0.953749	1.43028	3.2602	0.629341	0.10312	0.3795	1.58e-05	8	28341	c
1126	164	47	7.09668	2.169	2.66909	10.658	75.1441	174.152	21.714	0.854753	-1.26955	0.0367421	3.06457	0.6727	5.68159	0.556583	28.0558	738.859	1.16353	1.62361	3.06457	0.635402	0.178439	0.521983	0.0316235	4.04959	0.537556	5.37846	0.467639	27.9174	731.339	1.12417	1.62196	4.04959	0.662255	0.175289	0.517439	1.13e-05	7	28341	c
1127	238	63	8.18716	2.09186	3.40742	11.2768	120.747	174.682	21.5314	0.626993	1.10282	0.134441	0.667464	0.495955	1.66211	0.736603	26.9522	688.234	0.755716	0.98132	0.667464	0.379471	0.118965	0.34166	0.108954	1.17318	0.153493	1.69296	0.627933	26.8045	682.608	0.708322	1.04791	1.17318	0.454728	0.0203436	0.145969	1.81e-05	13	28341	c
1128	102	39	5.12308	1.62451	0.493215	7.47558	280.545	175.708	15.4762	0.781553	0.0429672	0.0535754	1.7003	0.498531	2.69532	0.569611	33.6884	1077.16	0.945802	1.35357	1.7003	0.516882	0.103233	0.370132	0.063012	2.5942	0.15488	2.53481	0.516198	33.6957	1083.35	0.835323	1.28834	2.5942	0.586212	0.0824278	0.3238	1.28e-05	8	1127	c
1129	147	51	6.4392	2.35246	0.961384	9.99425	166.943	181.838	21.3062	0.869221	1.49934	0.062488	1.556	0.547489	2.7193	0.587995	32.896	1026.02	0.94765	1.34042	1.556	0.499822	0.112272	0.383901	0.0631007	3.15686	0.0210432	2.61236	0.466701	33.0392	1040.44	0.834432	1.34232	3.15686	0.617157	0.0542304	0.268501	1.64e-05	6	187	c
1130	272	66	9.76697	3.52252	3.88485	16.4317	134.518	190.953	31.0827	0.921597	-1.07018	0.0339284	1.85802	0.781016	5.24238	0.588333	28.9239	785.581	1.16653	1.58683	1.85802	0.546305	0.238022	0.590475	0.0330512	4.04225	0.531626	5.3152	0.462329	28.6901	773.003	1.12595	1.59876	4.04225	0.670869	0.145264	0.470676	1.48e-05	10	28341	c
1131	250	67	9.0714	2.27537	4.61126	14.0642	188.614	189.212	25.5417	0.825412	-1.13781	0.0490551	1.74175	0.773383	4.84294	0.605703	27.2002	693.911	1.11803	1.49033	1.74175	0.533855	0.243811	0.582124	0.0386996	3.13402	0.530341	4.33649	0.504156	26.7423	669.337	1.06883	1.54369	3.13402	0.640729	0.128689	0.43737	1.29e-05	4	28341	c
1132	72	26	4.41427	0.85709	2.58151	6.07412	113.612	184.727	11.8163	0.723207	-0.393702	0.150874	0.685106	0.401008	1.57188	0.72383	27.2723	707.791	0.698126	0.926213	0.685106	0.377201	0.08876	0.28711	0.126682	1.09804	0.0962025	1.60746	0.615686	27.3725	714.398	0.669247	0.985948	1.09804	0.419295	0.0431691	0.206322	1.55e-05	10	28341	c
1133	218	50	8.03711	1.87757	4.96181	11.1346	260.75	190.441	23.2207	0.833847	0.384625	0.0312337	2.20791	0.715758	4.88386	0.546175	29.5395	819.709	1.14268	1.59928	2.20791	0.568178	0.1866	0.529578	0.0266356	4.40437	0.422934	4.81618	0.42075	29.541	819.382	1.10647	1.6555	4.40437	0.679205	0.101861	0.403472	9.33e-06	8	232	c
1134	140	43	6.33734	1.98709	1.34904	9.51163	153.86	193.074	18.9107	0.784425	-1.25163	0.0282924	3.60788	0.739227	7.91766	0.518656	28.9606	794.344	1.20663	1.73067	3.60788	0.657352	0.21061	0.578463	0.0267597	7.06122	0.53557	8.60204	0.391533	28.5714	773.562	1.18137	1.72822	7.06122	0.779903	0.221004	0.590843	1.4e-05	7	185	c
1135	76	32	4.52365	0.674205	2.92951	5.83798	212.922	200.113	11.1049	0.528067	0.835109	0.0450533	2.70248	0.35809	3.10503	0.495079	31.7934	955.14	0.980691	1.46733	2.70248	0.597852	0.052425	0.275601	0.0580546	4.39216	-0.0777358	3.03768	0.398279	31.9216	968.457	0.861981	1.32046	4.39216	0.650323	0.0849526	0.332491	8.41e-06	5	965	c
1136	172	54	6.93668	1.71157	3.52363	9.77569	198.916	8.91444	18.4629	0.579219	-0.384748	0.0383259	2.96277	0.670285	5.49293	0.527689	22.8477	486.174	1.14138	1.59555	2.96277	0.623791	0.193843	0.538509	0.0328453	6.81955	0.308009	5.92748	0.399867	22.5789	474.112	1.10288	1.59599	6.81955	0.759176	0.115231	0.421058	5.2e-06	9	65769	l
1137	72	25	4.42994	0.790703	3.09684	5.77844	216.881	6.61287	12.3847	0.759421	-0.550405	0.0362769	3.61411	0.52391	4.79562	0.462475	23.888	530.779	1.10176	1.59895	3.61411	0.656476	0.116096	0.422927	0.0605469	7.54167	0.022942	4.85938	0.39711	24.25	550.848	0.948672	1.34173	7.54167	0.771836	0.0547113	0.26962	5.2e-06	11	287	l
1138	160	41	6.74664	1.07365	4.43802	8.41534	163.509	14.7812	17.4856	0.698306	-0.803985	0.032477	2.70194	0.652072	4.8829	0.521695	24.9101	578.94	1.11698	1.58771	2.70194	0.609915	0.151356	0.478473	0.0387931	6.01724	0.169116	4.62099	0.416226	24.5862	563.919	1.01817	1.5233	6.01724	0.749409	0.0616849	0.303979	4.97e-06	7	65769	l
1139	83	29	4.66843	0.486457	3.79702	5.62354	252.918	17.2321	11.7559	0.545014	-1.40889	0.0453642	2.99644	0.561262	4.41484	0.522455	23.9217	532.321	1.08187	1.53572	2.99644	0.634148	0.133753	0.444505	0.0389256	6.25424	0.174481	4.78806	0.360938	23.9831	536.218	1.01961	1.5189	6.25424	0.752422	0.141185	0.453927	6.2e-06	12	865	l
1140	255	73	9.30641	3.50666	3.32459	15.4547	190.915	24.539	31.5126	0.909743	-0.536865	0.0298265	2.54893	0.670432	4.86708	0.539297	25.1699	589.288	1.16217	1.64449	2.54893	0.598767	0.167467	0.50951	0.0222978	5.78307	0.308761	5.18312	0.37681	25.1164	586.631	1.12303	1.73515	5.78307	0.735072	0.0664535	0.335308	6.89e-06	12	65769	l
1141	76	30	4.6124	1.36103	2.74591	6.71863	146.632	19.1857	14.9128	0.886977	0.0872818	0.0314519	3.25896	0.486289	4.17198	0.497957	26.5179	656.721	1.076	1.59956	3.25896	0.638138	0.113491	0.418415	0.046439	5.91837	0.264949	5.02582	0.352055	26.2449	643.904	1.07111	1.45662	5.91837	0.725015	0.131343	0.430303	5.18e-06	6	83	l
1142	332	75	10.2875	2.33513	5.13754	16.0115	200.578	37.4526	24.5296	0.551906	1.31823	0.0564529	2.17647	0.659157	4.19277	0.589491	23.2017	500.62	1.06517	1.47197	2.17647	0.575077	0.163811	0.480602	0.0613512	3.98842	0.30511	3.86982	0.505856	22.9151	487.572	1.0043	1.46484	3.98842	0.689647	0.068545	0.314242	8.64e-06	18	65769	l
1143	144	41	6.52091	1.72503	3.67452	9.32553	230.925	25.6159	19.6768	0.855494	0.353404	0.0414403	3.07937	0.546209	4.39294	0.520358	23.9127	530.947	1.09923	1.55637	3.07937	0.629974	0.136451	0.451454	0.0375327	7.36134	0.202698	5.61641	0.430889	24.2353	547.492	1.07525	1.54535	7.36134	0.774604	0.0859701	0.360023	8.21e-06	17	215	l
1144	145	42	6.42123	1.5287	3.14754	8.49943	255.128	27.0879	18.5522	0.813635	0.0759354	0.0768271	2.18379	0.578697	3.59172	0.569537	24.9071	580.691	0.979978	1.37254	2.18379	0.578481	0.136771	0.4272	0.0598985	5.75806	0.177832	4.50176	0.444328	25.4677	608.354	0.970698	1.42939	5.75806	0.730612	0.059251	0.289099	7.65e-06	16	865	l
1145	377	78	10.9442	3.69204	3.48661	17.4379	139.275	37.914	34.8151	0.87683	0.614272	0.05617	2.06423	0.650635	3.95427	0.600304	24.1679	543.736	1.0598	1.46019	2.06423	0.571974	0.184323	0.506519	0.0404478	3.61589	0.344097	3.75643	0.491981	24.0861	540.018	1.00779	1.51551	3.61589	0.665743	0.0591276	0.296991	7.17e-06	9	65769	l
1146	329	91	10.5714	4.44376	2.39832	19.19	219.563	34.7503	37.8409	0.940382	0.487487	0.0497842	2.51518	0.582419	4.0116	0.562885	24.0954	539.958	1.06442	1.50098	2.51518	0.600385	0.136267	0.443926	0.0471677	4.54032	0.231264	3.95311	0.469235	23.7581	525.778	0.987343	1.50489	4.54032	0.710632	0.0591618	0.29608	9.21e-06	18	65769	l
1147	86	33	4.75686	1.03758	2.15152	6.52212	104.75	29.9085	12.9556	0.710457	-0.659283	0.0440505	1.87018	0.76142	4.91939	0.571909	27.8561	730.708	1.08114	1.49658	1.87018	0.536755	0.221373	0.557689	0.0349368	4.68852	0.425741	5.08224	0.411008	27.6393	718.127	1.05953	1.549	4.68852	0.682501	0.164271	0.492052	6.2e-06	12	65769	l
1148	329	79	9.94977	3.15392	1.90383	16.1396	87.8573	36.5787	28.3306	0.737345	1.41261	0.0499792	1.79407	0.751547	4.61048	0.615716	25.111	587.965	1.12524	1.50631	1.79407	0.539915	0.229182	0.56822	0.0348161	3.33333	0.495372	4.30276	0.484885	25.0775	585.505	1.08528	1.60374	3.33333	0.646081	0.10189	0.397706	6.73e-06	13	65769	l
1149	51	21	3.67036	0.730042	2.29808	4.75547	275.248	30.2498	10.654	0.797483	0.85972	0.0433708	3.7439	0.48492	4.6343	0.491342	21.7805	439.79	1.06824	1.5261	3.7439	0.668125	0.147176	0.463997	0.0772889	6.51724	0.0669844	4.49257	0.416172	22.1724	461.07	0.874133	1.21457	6.51724	0.71576	0.151602	0.42502	6.11e-06	13	65769	l
1150	144	48	6.5859	1.91634	2.74154	9.74334	117.342	34.0769	19.1884	0.808611	0.0281329	0.040975	2.44353	0.64429	4.43473	0.573086	24.8706	575.813	1.11106	1.53207	2.44353	0.593341	0.191937	0.526946	0.0459704	4.61224	0.270536	4.16139	0.490321	24.6122	565.381	1.00403	1.49643	4.61224	0.712674	0.190398	0.519745	6.82e-06	11	65769	l
1151	348	66	10.1378	1.78662	5.76594	13.1623	165.172	38.8467	24.0088	0.476065	1.0666	0.0503529	1.81176	0.672944	3.76981	0.600053	24.1725	543.078	1.06821	1.4498	1.81176	0.538968	0.196679	0.52069	0.0386646	4.18403	0.287719	3.93706	0.463869	24.191	544.835	1.01187	1.53393	4.18403	0.682039	0.0583076	0.296664	7.52e-06	11	65769	l
1152	122	39	5.96682	1.96149	2.39356	8.81932	74.6927	42.9624	19.6736	0.895588	1.38234	0.0498357	2.14833	0.512173	3.20194	0.576577	26.4545	654.383	1.00413	1.44325	2.14833	0.577354	0.112665	0.397847	0.055296	4.06742	0.0374641	3.11286	0.441019	26.4719	659.479	0.877085	1.38758	4.06742	0.677067	0.0839105	0.338285	6.93e-06	15	65769	l
1153	96	30	5.10461	0.555402	4.01677	6.1807	244.741	40.7657	12.8543	0.588802	-0.818329	0.039158	3.34347	0.691067	6.4113	0.513632	24.8936	582.025	1.15077	1.6172	3.34347	0.648369	0.183103	0.527412	0.0338613	6.80303	0.320344	6.00476	0.376323	24.4394	558.967	1.07808	1.56442	6.80303	0.764083	0.121768	0.42848	1.01e-05	22	865	l
1154	231	59	8.21844	2.1295	4.23149	11.4688	269.355	46.6842	23.8259	0.80677	-0.912029	0.0430727	2.18803	0.607656	3.78841	0.561989	25.7094	615.731	1.07679	1.51157	2.18803	0.569471	0.148069	0.463377	0.0336389	4.28977	0.321333	4.16044	0.437759	25.392	600.484	1.05828	1.56871	4.28977	0.690647	0.0718403	0.332147	8.92e-06	18	65769	l
1155	126	36	6.1201	1.36324	3.68063	8.43553	252.16	46.6241	17.8169	0.830042	-0.952324	0.0376113	2.78995	0.602491	4.5093	0.5266	24.4475	555.968	1.10824	1.57668	2.78995	0.616396	0.155629	0.483347	0.032077	4.32609	0.249518	3.88221	0.415512	24.2826	548.128	1.02481	1.57059	4.32609	0.672788	0.0758377	0.341244	1.05e-05	20	865	l
1156	110	34	5.47298	1.16231	2.69884	7.22261	62.5306	48.1009	15.5649	0.770269	1.5172	0.0407638	2.57143	0.678566	4.99994	0.549738	25.127	590.537	1.10389	1.53258	2.57143	0.6033	0.164732	0.490431	0.0546387	5.68354	0.192933	4.52111	0.470362	24.4684	559.01	1.0033	1.4642	5.68354	0.731451	0.0800526	0.339028	6.61e-06	13	65769	l
1157	59	22	3.90749	0.34929	3.44046	4.61425	119.515	44.7851	10.0446	0.576771	1.12796	0.0385141	4.75897	0.49581	5.71942	0.454989	23.3026	506.743	1.10742	1.59831	4.75897	0.705705	0.11905	0.427982	0.0389887	11.4783	0.110916	7.4551	0.342948	24.3043	553.968	1.0745	1.4997	11.4783	0.797691	0.131085	0.435571	7.97e-06	14	65769	l
1158	284	78	9.4443	2.8278	4.4622	15.1603	211.655	53.2806	26.9851	0.739438	-1.14262	0.0368895	2.44523	0.669693	4.70144	0.542723	24.4975	558.326	1.13158	1.57685	2.44523	0.586643	0.168625	0.502017	0.0309711	5.15351	0.348897	4.95752	0.404985	24.443	555.55	1.10047	1.62447	5.15351	0.720079	0.0733743	0.341153	1.06e-05	22	65769	l
1159	383	86	10.5668	3.11525	4.07184	15.8986	287.585	60.1634	30.905	0.786414	1.48779	0.0370703	2.01156	0.693875	4.28552	0.56943	25.3757	599.538	1.11861	1.55839	2.01156	0.554686	0.176874	0.510825	0.0283598	4.17778	0.386383	4.40422	0.435462	25.327	596.95	1.08835	1.64365	4.17778	0.683754	0.0694188	0.333893	7.81e-06	17	65769	l
1160	260	64	8.97205	2.52835	3.51566	13.4832	104.334	55.028	26.2568	0.82171	0.809236	0.0535397	1.67927	0.69502	3.75308	0.587784	25.5346	608.423	1.05825	1.43312	1.67927	0.523158	0.186681	0.505497	0.0368352	3.32683	0.437832	3.95893	0.457892	25.1805	591.349	1.0384	1.54016	3.32683	0.632658	0.0927585	0.373	9.02e-06	18	65769	l
1161	269	67	9.03642	1.80628	4.65109	13.5544	90.9729	59.7988	22.0928	0.587385	1.37759	0.0271839	2.58737	0.708786	5.44238	0.520881	25.3684	600.313	1.17893	1.64982	2.58737	0.598458	0.183036	0.531788	0.0266048	6.46602	0.294154	5.58033	0.366304	25.1359	588.366	1.12528	1.69937	6.46602	0.761747	0.0664697	0.332073	9.31e-06	18	65769	l
1162	69	25	4.25306	0.528666	3.3752	5.24137	233.643	53.2839	11.1974	0.652981	1.18299	0.0533255	4.02165	0.505157	5.06355	0.484459	23.5108	516.265	1.06015	1.48864	4.02165	0.678148	0.139912	0.447929	0.0445648	13.2653	0.0740202	8.16285	0.341312	23.9592	541.38	1.02462	1.45155	13.2653	0.835482	0.186884	0.50854	1.15e-05	25	65769	l
1163	139	47	6.4729	1.66181	2.6537	9.44635	165.195	59.2312	19.0203	0.834442	1.26102	0.0464091	2.53376	0.631851	4.44121	0.553841	25.192	592.139	1.08996	1.50565	2.53376	0.59883	0.175568	0.501571	0.038835	5.82524	0.263321	4.95372	0.418341	25.2427	594.4	1.06814	1.5761	5.82524	0.756455	0.0812753	0.353544	9.24e-06	11	65769	l
1164	136	41	6.72617	2.2201	2.72309	10.6428	178.049	56.185	21.3379	0.907356	-0.672148	0.0499293	2.38166	0.591672	3.91636	0.55152	25.4179	603.175	1.04802	1.47656	2.38166	0.590232	0.143725	0.452099	0.0623799	4.61765	0.133277	3.66386	0.501281	25.2647	597.854	0.937428	1.35642	4.61765	0.711221	0.0735013	0.313571	9.29e-06	16	65769	l
1165	578	128	13.4321	4.19589	5.32215	21.4439	138.893	68.3182	41.2329	0.817102	0.621385	0.0383265	1.97419	0.686981	4.15347	0.584168	25.7772	619.086	1.11054	1.54006	1.97419	0.558477	0.176405	0.507608	0.0298431	4.27948	0.326244	4.17584	0.433021	25.5284	607.099	1.06055	1.63811	4.27948	0.691174	0.0467283	0.274562	9.71e-06	18	65769	l
1166	137	44	6.11348	1.3362	3.31304	8.67985	222.398	60.2369	16.7286	0.702355	-0.722878	0.0320511	2.93362	0.642575	5.10382	0.513171	24.4582	557.403	1.13611	1.62584	2.93362	0.624967	0.169743	0.510239	0.0326797	8.14706	0.236416	6.33475	0.379177	24.3627	554.869	1.08878	1.61812	8.14706	0.78717	0.109289	0.413049	1.16e-05	27	65769	l
1167	154	44	6.61388	1.77982	3.28187	9.34917	54.4642	63.8435	19.4492	0.810064	1.47124	0.0488419	2.40149	0.618353	4.14621	0.568862	24.3792	552.977	1.08125	1.49209	2.40149	0.594289	0.180587	0.506319	0.0323407	5.23967	0.211443	4.32231	0.403019	24.3636	552.478	1.03065	1.59663	5.23967	0.707526	0.121056	0.431221	7.33e-06	13	65769	l
1168	171	54	7.30834	2.16049	2.37153	11.9037	269.085	63.1244	21.8278	0.839731	0.332935	0.0342703	2.15503	0.702536	4.62233	0.557587	26.3322	646.826	1.14309	1.58239	2.15503	0.569607	0.18477	0.524788	0.0404537	3.56522	0.4377	4.17021	0.483428	25.8783	625.204	1.05713	1.52985	3.56522	0.639964	0.139387	0.452598	1.05e-05	23	65769	l
1169	271	76	9.03159	2.85803	4.39186	14.4194	72.0144	67.4286	27.3559	0.807517	-0.966811	0.0538157	1.84437	0.622651	3.44386	0.58625	25.0831	586.629	1.02694	1.43357	1.84437	0.543999	0.145734	0.449171	0.042731	3.94811	0.265788	3.68867	0.463521	24.9953	582.498	1.00171	1.52044	3.94811	0.67566	0.051063	0.276733	9.09e-06	18	65769	l
1170	99	37	5.21767	1.31023	2.96916	7.43656	63.4579	63.8855	15.4183	0.815067	-1.35564	0.0386639	2.30909	0.757201	5.75514	0.551962	25.0606	588.895	1.14024	1.56549	2.30909	0.580988	0.210066	0.55453	0.0407656	5.98529	0.455877	6.49995	0.422125	24.9853	586.33	1.10402	1.54414	5.98529	0.736137	0.142985	0.460034	8.22e-06	15	65769	l
1171	74	26	4.40879	0.458793	3.48157	5.18561	244.505	61.3782	11.3737	0.607289	-0.403006	0.0462089	4.40562	0.505665	5.45611	0.475383	24.8956	579.274	1.10787	1.60419	4.40562	0.70316	0.113883	0.419656	0.0454545	9.21818	0.106092	6.15612	0.408144	25.2909	600.702	1.01549	1.43557	9.21818	0.772071	0.0659344	0.305357	1.21e-05	26	65769	l
1172	435	83	11.6079	2.9313	6.74598	16.7268	196.331	74.2892	33.0313	0.817484	-1.32733	0.0463938	1.96176	0.679044	4.05611	0.591177	24.6903	567.87	1.07657	1.48634	1.96176	0.560149	0.173108	0.495463	0.0317558	4.36957	0.338532	4.30293	0.446948	24.6957	567.774	1.05392	1.59814	4.36957	0.69534	0.0512493	0.283939	1.12e-05	23	65769	l
1173	116	35	5.6561	1.13945	3.93467	7.67716	43.0384	71.3081	15.8403	0.776932	1.52379	0.0392989	2.62779	0.592616	4.2252	0.519406	24.1315	540.369	1.10771	1.56482	2.62779	0.598959	0.148605	0.471314	0.0373059	6.02247	0.240406	4.96427	0.423089	24.0899	539.302	1.07972	1.53956	6.02247	0.756626	0.121633	0.425167	6.52e-06	13	65769	l
1174	294	62	9.24469	1.87069	4.82808	12.7932	108.79	72.9999	25.3148	0.773105	0.22768	0.0692643	1.37231	0.733839	3.57797	0.651665	24.7306	570.409	1.03523	1.35972	1.37231	0.498527	0.232454	0.548338	0.059	3.236	0.417626	3.77828	0.523488	24.692	569.561	0.992131	1.42557	3.236	0.627046	0.0928069	0.359926	1.02e-05	23	65769	l
1175	77	26	4.55582	0.67641	3.35388	5.67878	233.984	68.7756	12.1499	0.712323	-0.468012	0.0422855	2.86538	0.433936	3.53097	0.517262	25.1731	590.668	1.0192	1.50521	2.86538	0.618315	0.0937142	0.370896	0.032031	6.59322	-0.00124332	4.29252	0.34549	25.6102	612.927	0.985982	1.57814	6.59322	0.756195	0.0573024	0.298155	1.25e-05	26	65769	l
1176	103	42	5.91534	2.09461	2.79496	9.96195	276.251	76.5122	19.209	0.907735	1.50197	0.05881	3.12684	0.558019	4.53731	0.555018	24.1003	541.36	1.07123	1.51937	3.12684	0.643798	0.136771	0.447139	0.0402199	6.11111	0.110462	4.43499	0.414038	24.1944	545.39	1.00477	1.47264	6.11111	0.754836	0.0666608	0.310751	1.06e-05	24	65769	l
1177	94	33	5.20017	1.26315	2.68537	7.85082	160.865	74.48	15.4498	0.82866	-1.34944	0.0362826	3.02839	0.602747	4.81166	0.491477	23.5142	514.409	1.10458	1.57885	3.02839	0.618465	0.146295	0.469661	0.100562	5.10294	0.231989	4.32218	0.45188	23.4265	515.742	0.89746	1.20209	5.10294	0.711364	0.0747094	0.298451	1.04e-05	8	65769	l
1178	258	59	8.75421	2.6945	1.98768	12.9838	251.449	77.7122	26.4964	0.824799	0.809399	0.0384707	2.7972	0.698462	5.63822	0.545855	23.2287	502.851	1.15846	1.60885	2.7972	0.612319	0.191376	0.537184	0.0303089	5.42857	0.399579	5.52064	0.435316	22.9655	489.596	1.12651	1.66661	5.42857	0.737748	0.0917511	0.384815	1.26e-05	26	65769	l
1179	308	78	9.87419	3.04494	3.37762	15.9839	296.87	82.8668	29.0571	0.800027	-1.00456	0.0418451	2.43613	0.658167	4.56334	0.584812	24.7774	571.556	1.11857	1.56494	2.43613	0.595068	0.175843	0.510341	0.0398365	3.81092	0.427128	4.32616	0.493203	24.5	557.831	1.08339	1.58755	3.81092	0.671023	0.123639	0.434489	8.36e-06	16	65769	l
1180	157	57	6.84949	1.87591	2.52784	10.2189	93.055	79.3442	20.0272	0.793963	0.834524	0.0425361	2.10626	0.614516	3.73197	0.545597	25.0019	581.259	1.07624	1.50572	2.10626	0.561385	0.155051	0.47286	0.0344572	5.19626	0.157337	4.08324	0.415629	24.8224	574.388	1.00539	1.5765	5.19626	0.725803	0.112867	0.414564	1.05e-05	22	65769	l
1181	56	22	3.79368	0.662221	2.72803	4.80401	265.218	75.6004	10.6678	0.737956	-1.3236	0.047747	3.67213	0.397046	4.04512	0.489112	22.8962	486.968	1.02246	1.50291	3.67213	0.662083	0.0860002	0.355436	0.0465306	8.11429	-0.116854	4.63265	0.366499	22.5714	474.315	0.940453	1.4019	8.11429	0.779042	0.0651288	0.300101	1.17e-05	26	65769	l
1182	630	106	13.5503	2.91651	6.24389	18.8836	70.54	89.1132	33.0977	0.517238	-0.156228	0.0423821	1.8294	0.731585	4.40779	0.599421	24.5821	562.019	1.12538	1.52291	1.8294	0.543797	0.215183	0.554381	0.0311891	4.17844	0.367909	4.30525	0.458878	24.3532	550.742	1.07873	1.62997	4.17844	0.681535	0.0696267	0.333066	1e-05	25	65769	l
1183	192	48	7.50288	1.87297	4.07109	10.612	219.302	82.5478	21.2199	0.794379	0.958459	0.031139	2.50733	0.661349	4.70194	0.536345	24.3695	552.365	1.13022	1.60125	2.50733	0.593987	0.156835	0.488392	0.0228143	5.24832	0.331616	4.92613	0.371646	24.0134	535.592	1.09758	1.68795	5.24832	0.706923	0.0589264	0.312103	1.25e-05	30	65769	l
1184	187	47	7.52706	2.37798	2.438	11.1321	171.941	85.7066	23.2474	0.863522	1.04572	0.0308397	2.67927	0.648393	4.81004	0.522972	24.5825	562.641	1.12867	1.60561	2.67927	0.601595	0.164597	0.500222	0.025327	6.06897	0.251622	5.05474	0.376288	24.4414	556.193	1.07381	1.66504	6.06897	0.735112	0.0644463	0.323963	1.13e-05	14	65769	l
1185	66	27	4.20157	0.936107	2.22531	5.70154	183.548	81.2601	12.2421	0.784458	-0.393976	0.0299405	4.10698	0.438133	4.65476	0.415151	24.1163	540.487	1.09509	1.62413	4.10698	0.66355	0.0991425	0.394772	0.0389316	7.95745	-0.0430809	4.8144	0.38403	23.617	518.497	1.00735	1.48363	7.95745	0.795807	0.132428	0.435596	1.13e-05	18	65769	l
1186	261	59	8.59671	1.71567	4.58449	11.5164	129.007	88.2478	20.7289	0.413561	1.24313	0.0398359	2.19149	0.659451	4.21759	0.567633	23.9553	533.16	1.09747	1.53185	2.19149	0.569594	0.179009	0.509951	0.0386608	4.58216	0.300629	4.27592	0.451902	23.9343	532.869	1.03565	1.55578	4.58216	0.70745	0.0844018	0.35793	1.13e-05	19	65769	l
1187	211	48	7.75693	1.05647	5.51753	9.5887	104.085	89.4986	18.6676	0.576408	-0.844487	0.0362124	2.22649	0.675122	4.42666	0.544107	23.7894	525.369	1.12029	1.55462	2.22649	0.571582	0.173566	0.505785	0.0297428	4.44304	0.364181	4.49395	0.438336	23.6835	520.529	1.07833	1.64035	4.44304	0.695084	0.110613	0.418029	1.12e-05	24	65769	l
1188	85	28	4.73808	0.387451	4.04093	5.35595	238.824	86.8173	10.8941	0.223138	-1.09943	0.0424435	2.86207	0.483368	3.76993	0.494982	24.2552	546.879	1.04609	1.52435	2.86207	0.611472	0.0914849	0.368732	0.0398611	5.25	0.186729	4.22771	0.385498	24.35	552.088	1.01703	1.50776	5.25	0.717592	0.0907329	0.36539	1.31e-05	27	65769	l
1189	136	45	6.59325	2.11721	3.30686	10.3924	41.8007	88.2166	21.3774	0.902335	0.252245	0.030804	2.74403	0.678785	5.27133	0.522904	26.718	668.319	1.14502	1.62298	2.74403	0.610319	0.184773	0.530443	0.0241734	6.7451	0.356962	6.24471	0.37654	26.6275	665.049	1.11636	1.72253	6.7451	0.771886	0.129882	0.461296	7.49e-06	15	65769	l
1190	182	51	7.33094	2.02516	3.18378	10.8573	163.146	91.8406	21.4338	0.806978	0.66548	0.0451068	1.50629	0.703726	3.54206	0.595468	26.1635	639.346	1.05009	1.42064	1.50629	0.501059	0.206886	0.528685	0.0332913	3.05797	0.420768	3.63968	0.447485	25.8551	623.661	1.03249	1.53062	3.05797	0.600807	0.0954786	0.377189	1.15e-05	11	65769	l
1191	121	50	6.26538	1.98943	2.36373	9.97934	284.282	89.9055	18.0453	0.79748	0.870818	0.0499407	2.63384	0.641221	4.67055	0.544647	25.5985	613.359	1.07685	1.50983	2.63384	0.607388	0.153715	0.47148	0.0444426	5.77922	0.324195	5.27581	0.412202	24.974	583.807	1.04742	1.50554	5.77922	0.737166	0.125773	0.427734	1.02e-05	22	65769	l
1192	52	21	3.62197	0.296116	2.86744	4.06885	312.462	87.8461	8.9069	0.453221	0.819662	0.0410525	4.45562	0.546435	5.91178	0.470293	23.1657	502.236	1.09659	1.54746	4.45562	0.689655	0.156586	0.480807	0.0339506	7.77778	0.391892	7.39506	0.297989	24.4444	562.75	1.10033	1.55409	7.77778	0.734485	0.2667	0.616549	6.46e-06	13	65769	l
1193	114	44	5.56295	1.3242	2.4597	8.06818	149.139	92.335	13.4504	0.275768	0.562705	0.0354098	2.36508	0.757777	5.88202	0.544143	25.6984	620.456	1.13638	1.55102	2.36508	0.585665	0.209336	0.55151	0.0502191	5.44595	0.454982	5.99612	0.481465	25.3108	603.074	1.05107	1.42665	5.44595	0.687363	0.13562	0.432936	1.15e-05	15	65769	l
1194	306	78	10.4847	3.69887	3.6852	17.2869	29.4817	104.555	32.3781	0.911467	-1.44368	0.0282333	2.27005	0.742205	5.40281	0.540831	25.4037	602.388	1.17464	1.63996	2.27005	0.573448	0.203605	0.557201	0.0222454	4.46835	0.503123	5.49643	0.420113	25.2785	595.756	1.14886	1.73057	4.46835	0.69427	0.104081	0.415988	6.9e-06	13	65769	l
1195	207	56	7.93936	2.34373	2.82058	11.8242	206.668	97.1427	23.9449	0.820172	-0.980517	0.0397276	2.19231	0.594619	3.70401	0.541609	25.3187	596.773	1.06688	1.52004	2.19231	0.565073	0.128551	0.434124	0.0326741	4.85802	0.184265	3.9777	0.39803	25.2284	592.812	1.02594	1.6021	4.85802	0.696944	0.0513471	0.284543	1.26e-05	26	65769	l
1196	168	45	6.87735	1.8061	2.87827	9.26379	248.912	97.4348	20.2349	0.817996	-1.12398	0.0526131	1.82264	0.676192	3.81438	0.597283	26.3328	648.148	1.05999	1.46264	1.82264	0.547236	0.183786	0.506184	0.05248	4.416	0.271214	4.0297	0.450107	26.096	635.903	1.03208	1.4863	4.416	0.686412	0.0840607	0.349677	1.3e-05	25	65769	l
1197	227	68	8.29419	2.75994	1.16353	12.7025	265.062	101.01	26.0925	0.838211	-0.753335	0.036729	2.22137	0.668129	4.34674	0.563762	26.112	636.082	1.11364	1.57193	2.22137	0.571923	0.177729	0.513882	0.0339682	3.3865	0.437629	4.01091	0.480825	25.9264	627.543	1.04897	1.58118	3.3865	0.642173	0.107677	0.405811	1.21e-05	28	65769	l
1198	61	24	3.94221	0.447551	3.11721	4.80975	315.694	97.4955	10.1439	0.584858	0.610214	0.025086	4.16418	0.54286	5.5546	0.444021	24.5821	562.977	1.15299	1.69484	4.16418	0.689263	0.117225	0.436194	0.030572	8.97436	0.0383261	5.66601	0.30518	24.0513	540.27	1.01694	1.57471	8.97436	0.79739	0.128836	0.441529	6.44e-06	11	65769	l
1199	115	35	5.64977	0.984816	3.83539	7.76228	195.099	101.598	15.2585	0.710537	1.25228	0.0682607	2.35516	0.622963	4.12325	0.574568	23.4635	514.403	1.00762	1.38565	2.35516	0.576948	0.172968	0.480383	0.0709496	3.90123	0.262915	3.6464	0.466309	23.2099	503.283	0.925394	1.32344	3.90123	0.668668	0.0909008	0.344109	1.24e-05	21	65769	l
1200	282	71	8.71236	2.55532	2.79871	12.6892	298.627	102.794	25.6648	0.771272	-0.271162	0.0264391	2.7657	0.678347	5.2992	0.507953	25.0508	584.472	1.17533	1.68014	2.7657	0.612135	0.162724	0.507357	0.0249569	5.86017	0.315242	5.27901	0.383853	25.1398	588.677	1.11025	1.68814	5.86017	0.742787	0.0700564	0.339626	8.93e-06	16	65769	l
1201	513	109	13.7305	5.73921	3.38259	24.2071	267.923	117.657	46.6212	0.903924	-0.876204	0.0341528	2.28425	0.699636	4.80247	0.553296	24.8279	573.819	1.14476	1.59622	2.28425	0.577856	0.177081	0.516372	0.027422	4.68657	0.353011	4.62183	0.423	24.7264	568.567	1.08814	1.65967	4.68657	0.699658	0.0597921	0.311826	1.2e-05	26	65769	l
1202	81	29	4.63912	0.597769	3.53074	5.82952	228.409	102.155	11.8137	0.625915	1.55571	0.0945204	1.73529	0.390366	2.42323	0.58948	24.7941	576.245	0.871585	1.25522	1.73529	0.52786	0.0770733	0.309395	0.113555	2.81034	0.180016	2.71366	0.539249	24.9138	584.571	0.819668	1.09519	2.81034	0.617535	0.0434894	0.217995	1.33e-05	28	65769	l
1203	74	28	4.40714	0.576387	3.23407	5.64692	237.003	101.369	10.7607	0.489251	0.702564	0.0568263	1.5551	0.52745	2.64544	0.58922	27.6776	720.106	0.936587	1.31965	1.5551	0.505486	0.109638	0.376743	0.0885417	3.0625	0.0939326	2.69	0.51875	27.3958	707.852	0.859926	1.15195	3.0625	0.5925	0.118553	0.367597	1.33e-05	30	65769	l
1204	90	29	4.88418	0.479969	3.78526	5.68882	47.7071	102.674	11.9585	0.492302	-0.317866	0.0508992	2.4026	0.649725	4.42958	0.54432	25.6104	613.347	1.07406	1.4935	2.4026	0.591283	0.166556	0.487493	0.0348944	5.12121	0.182078	4.13062	0.367885	25.4848	606.667	1.00494	1.53234	5.12121	0.693407	0.117233	0.416803	9.01e-06	18	65769	l
1205	73	26	4.40942	0.58144	3.22068	5.48316	117.938	102.552	11.8633	0.691834	-0.984403	0.0398334	3.49388	0.569179	5.05491	0.47908	22.351	464.454	1.09712	1.55721	3.49388	0.649285	0.146214	0.46669	0.0592593	6.48889	0.144085	4.79062	0.395004	21.6444	436.972	0.949081	1.31181	6.48889	0.732885	0.0749652	0.311646	1.21e-05	23	65769	l
1206	83	27	4.77604	0.85677	2.72367	5.85724	175.853	105.111	13.1564	0.760645	-0.781862	0.040653	1.94306	0.581553	3.32175	0.555495	26.7117	666.741	1.03302	1.46955	1.94306	0.543009	0.130524	0.430719	0.0444411	3.58621	0.121596	3.04132	0.420284	26.7241	670.595	0.916847	1.41679	3.58621	0.625958	0.0352382	0.2226	1.21e-05	17	65769	l
1207	148	43	6.5706	1.67594	4.02836	9.53914	144.293	109.759	19.448	0.833211	1.55426	0.0375635	1.70349	0.783183	4.92841	0.581498	24.6957	569.054	1.13636	1.52284	1.70349	0.521845	0.240017	0.583003	0.0371466	3.91453	0.493363	4.86325	0.441134	24.6667	567.737	1.08281	1.54579	3.91453	0.64991	0.136247	0.449763	1.21e-05	18	65769	l
1208	156	45	6.73968	1.93192	2.54733	9.59282	218.001	109.601	20.3362	0.835816	-1.1264	0.0409006	2.18785	0.654397	4.16526	0.548261	23.9558	533.027	1.09636	1.532	2.18785	0.567016	0.164548	0.490093	0.0369324	4.43697	0.29817	4.16101	0.440844	23.8319	527.757	1.03829	1.56273	4.43697	0.689527	0.0936909	0.37735	1.32e-05	28	65769	l
1209	300	71	9.56879	2.72271	4.58993	14.2036	61.6667	115.825	28.5951	0.836274	1.36007	0.0467586	1.88848	0.694438	4.09017	0.605323	25.552	608.605	1.09529	1.49663	1.88848	0.555124	0.201171	0.53337	0.0336185	4.20717	0.393226	4.46683	0.47034	25.5139	607.027	1.07285	1.62922	4.20717	0.682295	0.0949105	0.387095	1.07e-05	23	65769	l
1210	341	69	9.9782	2.08523	5.38386	14.4192	79.6828	111.892	24.308	0.546455	-0.319869	0.0406349	1.87974	0.715164	4.2997	0.612025	24.9629	579.764	1.1208	1.52791	1.87974	0.545245	0.209144	0.547848	0.0293719	3.93357	0.450441	4.57884	0.466405	25.1154	587.233	1.09766	1.65111	3.93357	0.664299	0.0993679	0.3982	1.15e-05	24	65769	l
1211	66	28	4.18796	0.951242	2.72273	6.05797	104.856	107.851	11.9329	0.758473	-1.24232	0.0586842	2.73832	0.430629	3.40469	0.568685	25.6542	615.713	0.979682	1.35799	2.73832	0.582927	0.132322	0.41838	0.0769231	2.12821	0.269712	2.4571	0.489744	25.3077	601.711	0.853426	1.19811	2.12821	0.515274	0.156048	0.428422	1.22e-05	22	65769	l
1212	87	34	4.84725	1.01197	2.86625	6.7111	134.225	108.589	12.5402	0.603371	-0.768244	0.0448348	2.20906	0.608718	3.82285	0.556344	24.6969	567.496	1.06609	1.49761	2.20906	0.573566	0.146901	0.459735	0.041859	4.26316	0.222051	3.74	0.425345	24.4035	555.676	0.973214	1.46868	4.26316	0.663699	0.0992381	0.377065	1.22e-05	20	65769	l
1213	92	32	5.15521	0.901405	3.40754	7.29632	188.176	109.667	12.9972	0.604736	-0.814757	0.0427153	2.53074	0.594732	4.12231	0.535752	24.0518	538.203	1.06821	1.51568	2.53074	0.595614	0.149671	0.466321	0.0598145	3.92188	0.244669	3.59613	0.461772	23.4219	512.483	0.92697	1.30067	3.92188	0.674854	0.099855	0.357451	1.24e-05	20	65769	l
1214	303	74	9.97031	3.59246	3.17476	16.6935	168.764	119.253	31.6848	0.86694	1.1125	0.0376135	2.39126	0.710804	5.13432	0.552483	23.895	531.946	1.13977	1.58068	2.39126	0.590724	0.178022	0.515497	0.0327953	5.5041	0.376295	5.41242	0.422688	23.5779	516.604	1.11771	1.63607	5.5041	0.742039	0.0715736	0.338173	1.2e-05	12	65769	l
1215	77	26	4.51316	0.49375	3.61661	5.4352	312.91	109.932	11.4952	0.617923	-0.348962	0.068358	2.46923	0.540092	3.68448	0.577964	26.1769	642.149	0.999943	1.39229	2.46923	0.601036	0.138063	0.43192	0.0485214	4.55102	0.150476	3.67857	0.435784	25.5714	612.18	0.954027	1.43445	4.55102	0.695013	0.0929292	0.361201	7.17e-06	14	65769	l
1216	71	26	4.34034	0.781744	2.71964	5.64429	248.882	111.465	11.7309	0.690284	-1.55103	0.0640567	3.10127	0.658242	5.53722	0.520146	23.3882	511.425	1.10865	1.51588	3.10127	0.642914	0.19103	0.523418	0.0477431	7.47917	0.176586	5.54156	0.370442	23.0208	495.092	1.01163	1.4638	7.47917	0.772327	0.213311	0.543117	1.3e-05	25	65769	l
1217	155	44	6.72759	1.95385	2.49348	9.62427	45.7626	116.997	20.3269	0.835652	0.88386	0.0219296	2.99258	0.701225	6.00808	0.473722	26.5659	660.175	1.20576	1.7196	2.99258	0.616312	0.172082	0.525912	0.0220486	6.43333	0.384296	6.22438	0.337877	26.55	659.465	1.15314	1.71357	6.43333	0.750852	0.107511	0.420611	9.59e-06	17	65769	l
1218	48	20	3.49502	0.58721	2.05913	4.38634	122.99	111.86	9.4709	0.702101	-0.330503	0.0485748	2.66883	0.365292	3.10241	0.500479	25.7338	618.552	0.978735	1.44016	2.66883	0.597922	0.071889	0.319103	0.0761719	3.5	-0.0980392	2.59375	0.468665	25.5	612.129	0.816934	1.20163	3.5	0.623482	0.0721257	0.293236	1.24e-05	24	65769	l
1219	576	143	13.6714	5.38812	0.398663	24.0961	155.404	130.82	42.7349	0.796972	1.3037	0.0443704	1.9475	0.689528	4.13635	0.59284	24.5775	562.22	1.0909	1.48484	1.9475	0.558202	0.191979	0.520047	0.0337635	4.48319	0.350896	4.45337	0.475452	24.6933	567.478	1.06813	1.58307	4.48319	0.702688	0.0585421	0.301753	1.17e-05	11	65769	l
1220	135	44	6.25187	1.54222	3.12093	9.22517	106.316	118.309	17.7874	0.79253	0.62441	0.0599953	1.18478	0.671401	2.80278	0.642084	27.7326	721.952	0.975817	1.30601	1.18478	0.466252	0.186087	0.484835	0.0442773	2.54717	0.379041	3.051	0.482242	27.7547	723.993	0.952914	1.42259	2.54717	0.572318	0.0857266	0.345879	1.25e-05	23	65769	l
1221	189	50	7.41681	1.76422	3.45809	11.1821	198.591	121.197	21.455	0.808808	0.567884	0.0409372	2.73913	0.652426	4.94035	0.563401	22.904	487.626	1.11865	1.55346	2.73913	0.608792	0.180646	0.515212	0.0382444	6.16	0.309802	5.46249	0.447596	22.5067	470.736	1.0813	1.57853	6.16	0.752317	0.0731856	0.33616	1.29e-05	22	65769	l
1222	149	40	6.4859	1.29108	4.12508	8.56541	235.795	120.279	17.7613	0.745172	0.165346	0.0312181	3.00952	0.611742	4.87568	0.481403	22.9371	488.419	1.12141	1.63022	3.00952	0.616468	0.135178	0.458794	0.0283019	5.33019	0.200886	4.33506	0.351425	22.2736	459.388	1.02793	1.6322	5.33019	0.70073	0.074833	0.34521	1.35e-05	25	65769	l
1223	205	58	8.1794	3.1376	2.13215	12.3733	293.722	125.566	28.7723	0.924533	0.956087	0.0280171	3.04039	0.579403	4.61437	0.485502	23.954	532.318	1.13079	1.66057	3.04039	0.620146	0.119264	0.435782	0.0264855	5.1634	0.273819	4.55517	0.387746	24.0392	536.42	1.07484	1.66958	5.1634	0.709528	0.0550573	0.300324	9.97e-06	17	65769	l
1224	59	22	3.90668	0.343527	3.25881	4.38819	303.868	119.018	9.18126	0.189169	-0.379447	0.0347008	4.32474	0.447542	4.91409	0.443571	24.7887	572.841	1.09247	1.62307	4.32474	0.68648	0.105852	0.407313	0.0440816	5.8	-0.0260669	3.82633	0.353549	24.2571	549.45	0.934519	1.41489	5.8	0.703209	0.0953666	0.363468	8.59e-06	14	65769	l
1225	525	105	12.1201	3.20677	5.12612	19.1443	15.7251	132.62	33.5265	0.738483	-1.07835	0.0350447	2.29332	0.718795	5.07766	0.560984	25.8862	625.689	1.15422	1.59798	2.29332	0.581793	0.189321	0.532976	0.0259611	5.1317	0.384789	5.17068	0.430503	25.7879	620.493	1.11119	1.68469	5.1317	0.731809	0.0535154	0.297447	6.42e-06	9	65769	l
1226	78	26	4.54469	0.484599	3.61559	5.29108	36.2529	121.966	11.3163	0.577252	-1.51575	0.0637985	2.45833	0.377258	2.9738	0.564951	26.8295	675.761	0.938923	1.37454	2.45833	0.597345	0.0644278	0.295711	0.129557	3.54167	0.0987409	2.96484	0.557787	26.375	656.843	0.830434	1.18998	3.54167	0.648293	0.0853016	0.317178	8.81e-06	14	65769	l
1227	110	39	5.69666	1.49963	3.22914	8.52999	129.41	121.646	17.0443	0.826676	0.62154	0.0306255	2.30352	0.699136	4.82818	0.517377	24.6938	568.29	1.12936	1.58168	2.30352	0.568739	0.180582	0.519095	0.0294925	5.09877	0.322738	4.76425	0.351204	24.358	553.309	1.04814	1.56873	5.09877	0.68767	0.124018	0.432799	1.23e-05	20	65769	l
[truncated: 1,455 more rows]
