# Supplementary material for: Characteristics of auto-quantified tumor-infiltrating lymphocytes and the prognostic value in adenocarcinoma of the esophagogastric junction, gastric adenocarcinoma, and esophageal squamous cell carcinoma
Source: Aging (Albany NY). 2024 Jul 5;16(13):11027–61. doi: 10.18632/aging.205999 (PMC11272125; doi:10.18632/aging.205999)
Supplement: Supplementary Dataset 3 [file aging-16-205999-s005.xls]

## Sheet: GACtrainingset
Supplementary Dataset 3. GAC cell feature training set.
index	s.area	s.perimeter	s.radius.mean	s.radius.sd	s.radius.min	s.radius.max	m.cx	m.cy	m.majoraxis	m.eccentricity	m.theta	h.asm.s1	h.con.s1	h.cor.s1	h.var.s1	h.idm.s1	h.sav.s1	h.sva.s1	h.sen.s1	h.ent.s1	h.dva.s1	h.den.s1	h.f12.s1	h.f13.s1	h.asm.s2	h.con.s2	h.cor.s2	h.var.s2	h.idm.s2	h.sav.s2	h.sva.s2	h.sen.s2	h.ent.s2	h.dva.s2	h.den.s2	h.f12.s2	h.f13.s2	densityValues	numberNeighbors	sizeCytoplasma	classCell
1	374	74	12.5754	4.95398	5.21366	20.9464	649.868	31.4564	42.5454	0.960229	-0.869567	0.036339	1.53608	0.816495	5.18539	0.617071	36.8306	1286.5	1.17539	1.56668	1.53608	0.512294	0.269375	0.621265	0.0256525	4.29739	0.510111	5.38608	0.459452	36.402	1256.15	1.14715	1.70766	4.29739	0.692624	0.109538	0.423723	3.65e-07	2	812	o
2	223	47	8.04656	1.211	6.17641	10.2188	135.247	25.1257	19.9574	0.615636	-0.988984	0.054939	1.36059	0.798863	4.38225	0.647977	34.7856	1148.75	1.07243	1.39662	1.36059	0.500475	0.29183	0.616024	0.0469104	2.98214	0.489778	3.9224	0.50198	34.1131	1103.95	1.01865	1.46018	2.98214	0.630171	0.120292	0.412872	2.76e-07	2	386	o
3	107	34	5.84727	1.93328	2.75169	8.85411	1174.75	24.5129	19.0753	0.919984	-0.983628	0.0588735	1.46429	0.583868	2.7594	0.590934	37.8489	1365.91	0.966125	1.32212	1.46429	0.49123	0.158651	0.451375	0.0446364	3.46988	0.145492	3.03034	0.454397	38.4096	1409.71	0.925504	1.41334	3.46988	0.647568	0.0691204	0.31022	1.12e-07	1	360	o
4	69	28	4.31032	1.29222	2.46429	6.19342	768.538	24.0674	13.7681	0.884406	-1.48838	0.257855	0.361233	0.362883	1.28349	0.819383	40.9163	1632.11	0.526465	0.635207	0.361233	0.284083	0.0982233	0.252008	0.184917	0.863636	-0.0108827	1.42717	0.677273	40.8636	1625.74	0.553604	0.797914	0.863636	0.403988	0.0127011	0.100734	3.55e-07	1	808	o
5	131	40	6.36544	1.99514	3.38018	9.74041	689.721	29.2879	20.4107	0.908992	-1.22164	0.0556457	1.2053	0.725947	3.19902	0.619868	38.9713	1449.46	0.999318	1.32707	1.2053	0.454474	0.214381	0.522373	0.0412186	2.76344	0.329687	3.06131	0.456989	38.7419	1433.1	0.958071	1.41958	2.76344	0.571791	0.0768933	0.327589	3.68e-07	3	244	o
6	162	41	6.83905	1.35476	4.66976	9.40041	943.819	32.7037	18.7142	0.798061	-0.404397	0.248691	0.351304	0.579167	1.41739	0.830609	40	1550.36	0.64216	0.755556	0.351304	0.288811	0.218171	0.410993	0.18356	0.68595	0.300359	1.49022	0.716529	39.6281	1520.56	0.65015	0.881455	0.68595	0.371647	0.0702784	0.24937	3.02e-07	2	361	o
7	151	39	6.52861	0.85768	5.09405	8.44291	1410.72	38.6472	16.6584	0.664222	1.05754	0.0329688	1.70467	0.83886	6.28942	0.558131	36.2617	1249.28	1.19279	1.58537	1.70467	0.511588	0.279146	0.634116	0.025824	5.168	0.529122	6.48762	0.381915	36.256	1248.95	1.15376	1.69027	5.168	0.710171	0.122356	0.444652	8.45e-08	1	697	o
8	47	21	3.41654	0.646505	2.34109	4.39748	227.826	34.6224	9.67219	0.757771	0.135301	0.0870222	1.19333	0.417185	2.02377	0.643333	38.54	1426.8	0.805439	1.11169	1.19333	0.468842	0.0967694	0.326943	0.0909631	2.34483	-0.14518	2.02378	0.448276	38.2069	1407.6	0.712266	1.1027	2.34483	0.509147	0.0581501	0.252802	2.91e-07	1	155	o
9	98	29	5.17935	0.745644	3.84139	6.45123	19.0999	37.7086	13.4084	0.701826	0.3499	0.115586	0.612426	0.645666	1.86419	0.73284	38.8314	1448.48	0.80985	1.00599	0.612426	0.353543	0.223393	0.472782	0.116362	1.08696	0.335217	1.81753	0.613043	38.5942	1434.25	0.75151	1.01596	1.08696	0.412671	0.098716	0.316425	2.4e-07	2	232	o
10	99	42	5.51732	1.68499	2.67367	8.73994	498.236	39.6014	15.0253	0.76282	-0.381563	0.0751565	0.907121	0.73347	2.70172	0.665325	40.1022	1539.69	0.93851	1.21561	0.907121	0.40897	0.243685	0.535093	0.0547145	2.57353	0.347856	2.97313	0.505277	39.7206	1509.74	0.933667	1.37026	2.57353	0.593824	0.0806112	0.329729	3.37e-07	2	978	o
11	120	37	6.31454	2.21083	2.94929	9.64623	838.532	43.3004	21.1656	0.93281	-0.627741	0.0683165	1.24634	0.701001	3.08419	0.643171	38.139	1388.61	0.970217	1.29912	1.24634	0.474968	0.199476	0.500129	0.0566782	3.11765	0.266538	3.12529	0.47547	37.8	1365.61	0.918772	1.36276	3.11765	0.624088	0.0725504	0.312256	4.03e-07	3	398	o
12	321	72	11.1061	4.51837	4.32232	18.4312	918.677	52.6437	40.0648	0.960209	1.10361	0.0263048	1.891	0.836513	6.78334	0.55631	34.7405	1144.95	1.21876	1.63647	1.891	0.538628	0.269081	0.631491	0.0190385	5.86538	0.514709	7.04316	0.385544	34.4346	1122.84	1.20014	1.77753	5.86538	0.745443	0.0943914	0.401823	3.86e-07	2	638	o
13	505	110	15.359	6.98606	4.91902	27.4703	466.9	47.4302	55.1073	0.974369	-0.251757	0.0928261	0.86376	0.690664	2.39615	0.703488	38.5019	1417.2	0.918965	1.18053	0.86376	0.422162	0.226315	0.510014	0.0687822	2.07901	0.279783	2.44332	0.556921	38.2321	1398.49	0.885201	1.30388	2.07901	0.55917	0.0371654	0.219494	3.53e-07	3	978	o
14	311	60	9.72066	2.50548	4.71678	13.8605	51.9437	47.8277	27.9106	0.817907	-0.129266	0.105489	0.802817	0.715934	2.41308	0.73051	26.0511	636.755	0.913325	1.15278	0.802817	0.413754	0.252029	0.531806	0.0790672	1.83704	0.367054	2.45118	0.594423	25.9481	632.094	0.885703	1.26607	1.83704	0.537308	0.0721094	0.300605	2.96e-07	3	1518	o
15	46	20	3.43343	0.747708	2.05	4.49472	142.996	45.0702	9.949	0.801021	0.457133	0.140974	0.678082	0.397486	1.56271	0.718493	39.7466	1528.16	0.67501	0.88656	0.678082	0.370068	0.0883694	0.28053	0.124512	1.5625	-0.111111	1.70312	0.55625	39.75	1530.89	0.639426	0.926575	1.5625	0.466958	0.0270861	0.158496	3.34e-07	2	147	o
16	579	101	15.3931	6.46203	5.27361	26.5675	704.405	68.7953	55.0799	0.961825	-1.03297	0.033865	1.37623	0.864745	6.08752	0.642465	35.8535	1218.76	1.21555	1.57144	1.37623	0.499012	0.329758	0.679945	0.0226107	3.90249	0.621206	6.15121	0.477407	35.3714	1184.47	1.19879	1.73754	3.90249	0.669195	0.154737	0.502781	4.92e-07	2	1255	o
17	160	41	6.80959	1.38472	4.71943	9.07583	810.408	57.3322	18.8939	0.79431	-0.806508	0.0498211	1.11307	0.771614	3.43683	0.632155	37.0424	1305.33	1.03269	1.33285	1.11307	0.441805	0.268208	0.581579	0.0383801	2.88235	0.38119	3.32895	0.462827	36.4622	1265.16	0.983693	1.46074	2.88235	0.59248	0.0715201	0.320443	4.56e-07	3	922	o
18	118	39	6.1395	2.0043	2.72821	9.0897	433.845	79.0662	19.8493	0.916442	-0.501098	0.181997	0.477612	0.472888	1.45305	0.770149	41.5025	1670.71	0.644463	0.796309	0.477612	0.315824	0.142181	0.338747	0.202395	0.623377	0.127891	1.3574	0.719481	41.3766	1666.76	0.560492	0.763518	0.623377	0.344584	0.0172766	0.114969	4.42e-07	4	3314	o
19	144	38	6.44258	1.08924	4.89537	8.47078	634.025	81.0906	17.2043	0.757137	-0.765106	0.0466764	1.42126	0.709089	3.44277	0.612436	37.9764	1371.78	1.05173	1.40638	1.42126	0.495233	0.216371	0.537673	0.0336642	4.4386	0.218734	3.84064	0.419663	37.6667	1351.22	1.00209	1.53192	4.4386	0.672986	0.0675138	0.318606	5.1e-07	3	303	o
20	242	55	8.58461	2.15368	5.01568	12.259	78.7255	83.0092	25.2593	0.851198	-0.273328	0.0371526	1.91762	0.774424	5.25049	0.560022	33.8078	1081.57	1.15076	1.52338	1.91762	0.543725	0.263283	0.608197	0.0282044	5.5102	0.406953	5.64567	0.408184	33.2653	1046.84	1.11303	1.64122	5.5102	0.730515	0.119303	0.43356	4.04e-07	3	380	o
21	491	85	13.721	5.3004	4.86816	22.4634	595.729	88.5597	46.3162	0.947114	-0.58215	0.0515932	0.923204	0.835463	3.80547	0.673646	37.1972	1313.34	1.09953	1.37733	0.923204	0.420623	0.331412	0.649145	0.0341739	2.55769	0.558446	3.89624	0.50992	36.8558	1289.09	1.07778	1.5497	2.55769	0.595153	0.125589	0.433037	5.17e-07	5	696	o
22	154	51	7.92524	3.60917	2.22019	13.4896	813.411	85.3882	29.855	0.972627	-0.573971	0.0830874	1.07663	0.500626	2.07798	0.65249	38.7893	1442.91	0.846225	1.15384	1.07663	0.447473	0.110101	0.354675	0.0677551	2.12381	0.0757662	2.14896	0.509524	38.7524	1443.15	0.796142	1.18453	2.12381	0.539421	0.0144505	0.130744	5.33e-07	5	1481	o
23	173	47	7.5765	2.27449	3.89734	11.5094	414.576	87.9069	22.9957	0.887389	-0.589413	0.0926711	0.692821	0.678757	2.07834	0.705676	40.0618	1538.5	0.884271	1.10966	0.692821	0.364017	0.225821	0.496072	0.063043	1.84328	0.239223	2.21145	0.534021	39.8134	1521.48	0.845787	1.26584	1.84328	0.514693	0.0333175	0.204896	4.63e-07	4	3314	o
24	511	81	12.5244	2.61668	7.7752	18.003	27.1713	100.502	33.2186	0.726468	-0.901486	0.0476148	1.12296	0.856558	4.91436	0.658518	33.5591	1064.5	1.15598	1.448	1.12296	0.461426	0.349171	0.676778	0.0339049	3.20805	0.588289	4.89601	0.49516	33.1051	1034.82	1.12947	1.59178	3.20805	0.638107	0.145551	0.47021	3.68e-07	2	2435	o
25	331	84	11.8031	5.38658	3.77398	20.637	339.68	107.691	45.0274	0.972552	-1.30305	0.0283815	3.05584	0.74503	6.99254	0.503843	32.0525	971.608	1.21914	1.69749	3.05584	0.633001	0.212938	0.57681	0.0250959	8.57661	0.289843	7.03853	0.373755	31.0847	910.846	1.16364	1.784	8.57661	0.821985	0.0570283	0.315321	5.08e-07	2	3314	o
26	145	38	6.44769	0.915809	4.76381	8.23083	401.619	95.8371	15.5949	0.5838	-0.90638	0.128535	0.54224	0.717965	1.9613	0.766601	40.8762	1608.94	0.805872	0.98595	0.54224	0.348102	0.264969	0.509929	0.101086	1.16514	0.418911	2.00255	0.637615	40.6697	1592.63	0.797597	1.0686	1.16514	0.459534	0.0831216	0.297507	4.83e-07	5	3314	o
27	228	48	8.38656	1.89523	5.39587	11.3776	640.566	97.8289	23.8147	0.841747	-0.875335	0.0393026	1.30583	0.839786	5.07526	0.62944	37.5485	1340.66	1.1389	1.49034	1.30583	0.483846	0.287849	0.627811	0.0294599	3.51111	0.595675	5.34194	0.453796	37.1	1307.37	1.13449	1.61538	3.51111	0.635875	0.133466	0.454173	5.51e-07	4	387	o
28	510	95	13.7459	5.16777	6.4617	22.8032	770.024	99.4994	45.6741	0.942998	0.148903	0.0425882	1.11855	0.835055	4.39068	0.649335	35.8533	1217.85	1.13431	1.4512	1.11855	0.456336	0.308376	0.640985	0.0279701	3.51376	0.500197	4.51514	0.464378	35.5367	1196.08	1.10518	1.6274	3.51376	0.65541	0.108294	0.412307	5.66e-07	2	1481	o
29	775	115	15.9035	4.56958	7.21702	24.0054	1390.48	107.769	48.872	0.893013	0.255622	0.0432734	1.00862	0.872603	4.9586	0.683469	36.0055	1228.94	1.16142	1.46773	1.00862	0.447089	0.347916	0.679028	0.0307198	2.67862	0.661074	4.95164	0.527247	35.707	1207.93	1.14115	1.61448	2.67862	0.608719	0.154816	0.487156	1.51e-07	1	1484	o
30	289	82	11.3742	5.57152	1.94148	20.7309	63.2417	103.693	45.3893	0.979749	0.301466	0.0692793	1.1063	0.633925	2.51103	0.645276	37.1752	1318.05	0.938361	1.24582	1.1063	0.450596	0.17735	0.463997	0.0515726	3	0.131896	2.7279	0.484657	36.9263	1302.11	0.895767	1.36272	3	0.620794	0.0178807	0.155841	4.28e-07	4	2435	o
31	428	90	12.744	5.23898	3.87861	21.4528	846.191	107.678	44.2165	0.937316	-0.00682782	0.0290527	1.78113	0.833049	6.3343	0.564181	34.622	1136.11	1.20701	1.59979	1.78113	0.52893	0.279907	0.637081	0.01776	5.62465	0.505923	6.69208	0.381602	34.2577	1110.09	1.19793	1.80267	5.62465	0.736676	0.0935118	0.402598	5.77e-07	4	2885	o
32	387	83	11.7888	4.67675	1.3914	18.8199	1066.27	115.274	40.9128	0.93318	-0.696629	0.0408732	1.34165	0.836781	5.10999	0.617618	35.0292	1163.74	1.13766	1.48006	1.34165	0.484263	0.29706	0.63507	0.0268166	3.98693	0.509904	5.0675	0.437412	34.6797	1139.15	1.11085	1.64786	3.98693	0.670166	0.106052	0.410509	4.04e-07	3	916	o
33	188	53	7.43178	1.92018	4.19641	10.9375	1090.58	109.719	20.9407	0.777127	0.0665547	0.0354695	1.48788	0.810735	4.93068	0.585152	35.897	1221.82	1.1466	1.51593	1.48788	0.491849	0.273296	0.617363	0.0245615	4.58442	0.497439	5.56106	0.40533	35.7403	1211.86	1.12521	1.66947	4.58442	0.687568	0.129069	0.453583	3.57e-07	3	916	o
34	316	76	11.7444	5.3115	3.46615	20.7222	266.073	121.707	43.3965	0.974263	-1.01287	0.0693786	0.870337	0.774254	2.92769	0.706447	38.151	1387.25	0.997138	1.26612	0.870337	0.422646	0.268892	0.57026	0.0498731	1.8902	0.548527	3.09336	0.575594	37.9451	1372.84	0.98082	1.38531	1.8902	0.549257	0.14463	0.440733	5.44e-07	2	728	o
35	315	73	11.025	4.61946	3.02718	18.559	373.181	124.402	39.7706	0.961329	-1.14216	0.0312902	1.88251	0.801868	5.75064	0.560471	35.0309	1161.4	1.20368	1.62131	1.88251	0.541417	0.259677	0.619343	0.0232663	5.29365	0.468625	5.98109	0.414187	34.627	1134.04	1.16942	1.76635	5.29365	0.730186	0.110257	0.431579	5.46e-07	6	3314	o
36	84	36	5.22633	2.21725	1.36111	8.67739	880.259	111.683	19.5591	0.9524	0.30715	0.0629866	1.69853	0.455472	2.55963	0.583088	38.1618	1392.01	0.912979	1.28841	1.69853	0.525236	0.0823368	0.323632	0.0538	4.5	-0.193064	2.8859	0.394706	37.42	1341.06	0.841081	1.31664	4.5	0.670016	0.0551003	0.268119	5.77e-07	3	2885	o
37	535	79	12.7876	2.73655	6.36254	17.3793	114.153	119.418	34.3076	0.743521	0.25141	0.040614	1.17359	0.869206	5.4864	0.660248	32.8864	1021.35	1.19144	1.49889	1.17359	0.471971	0.360941	0.695144	0.0267366	3.07127	0.643163	5.30347	0.499375	32.4104	990.615	1.16181	1.66491	3.07127	0.631682	0.155977	0.495444	5.12e-07	2	2435	o
38	438	108	14.0447	6.2729	4.3578	25.7299	296.182	141.673	51.4847	0.966194	-1.52789	0.0354852	1.98343	0.728994	4.65939	0.555266	34.2919	1111.33	1.14569	1.56408	1.98343	0.551597	0.218245	0.56418	0.0288724	5.75216	0.261397	4.89394	0.407352	33.8559	1082.57	1.10312	1.6764	5.75216	0.748555	0.0613517	0.317285	5.8e-07	3	1176	o
39	199	62	8.6161	3.68859	2.77588	14.7001	580.335	131.198	31.3127	0.960833	-1.35844	0.0450866	1.74964	0.624452	3.32945	0.562399	37.7381	1354.6	1.03615	1.42963	1.74964	0.522988	0.160977	0.470552	0.0351276	4.20714	0.117466	3.38356	0.415387	37.3071	1325.89	0.96758	1.54437	4.20714	0.674156	0.0207972	0.178704	5.91e-07	5	1308	o
40	82	29	4.67018	0.884072	3.05031	6.04246	1447.39	123.16	13.0357	0.763274	-0.0487694	0.0689374	1.61011	0.595626	2.99086	0.615162	37.4296	1338.42	0.932179	1.25664	1.61011	0.524157	0.175501	0.463413	0.0676663	2.47059	0.335058	2.85775	0.494118	37.0196	1310.46	0.887844	1.25405	2.47059	0.556771	0.0984383	0.348943	1.53e-07	1	285	o
41	553	110	15.21	6.60054	5.96713	26.7195	891.486	129.497	56.9002	0.970854	-0.0404349	0.030829	1.53057	0.849741	6.09311	0.600046	34.3018	1113.78	1.21192	1.58267	1.53057	0.50963	0.307603	0.661418	0.0225008	3.89955	0.586966	5.72062	0.453574	33.8192	1080.77	1.17284	1.72289	3.89955	0.670666	0.128704	0.459352	6.09e-07	6	2885	o
42	81	39	4.7889	1.73337	1.80746	8.02306	403.578	129.903	14.7265	0.831508	-1.14517	0.0827852	0.976285	0.601426	2.22472	0.658893	40.5573	1578.97	0.870429	1.1554	0.976285	0.424727	0.165677	0.434019	0.0698	2.52	0.146573	2.4764	0.484	40.12	1546.78	0.833926	1.21691	2.52	0.566448	0.0598162	0.268867	5.55e-07	5	676	o
43	183	47	7.38323	2.03554	4.42476	10.8649	611.631	131.37	22.17	0.862567	-0.374054	0.0803037	0.738059	0.77644	2.65069	0.710478	39.5085	1492.29	0.954293	1.19856	0.738059	0.38695	0.289141	0.577152	0.0538533	1.83453	0.48408	2.77792	0.557554	39.2158	1470.52	0.937395	1.34838	1.83453	0.529207	0.104291	0.371322	5.99e-07	6	328	o
44	340	79	11.2683	4.3698	4.41162	19.443	964.41	133.384	38.3609	0.947978	-0.282414	0.087257	0.75102	0.715322	2.31907	0.72049	38.1012	1386.74	0.923081	1.1691	0.75102	0.398254	0.241646	0.524231	0.0637791	1.89668	0.279367	2.31598	0.562569	37.9262	1376.61	0.868847	1.29873	1.89668	0.540531	0.0414852	0.231372	5.75e-07	4	2885	o
45	311	55	9.63927	1.40466	7.0416	12.1162	1039.91	139.573	24.6534	0.717071	0.534764	0.0325566	1.66171	0.818701	5.58279	0.592303	33.6512	1069.68	1.2011	1.58807	1.66171	0.524615	0.281949	0.637349	0.0258951	4.60153	0.50062	5.60725	0.4419	33.3218	1048.7	1.15244	1.68836	4.60153	0.690364	0.120223	0.440719	5.02e-07	2	470	o
46	154	57	7.62596	3.69179	1.83667	13.3359	928.786	135.783	30.7573	0.971448	0.0105072	0.129792	0.621881	0.647732	1.88268	0.748944	39.9693	1538.25	0.785913	0.993566	0.621881	0.369546	0.203372	0.448812	0.100248	1.82609	0.170103	2.10019	0.620205	39.6522	1513.28	0.784386	1.1444	1.82609	0.530018	0.0707356	0.283713	6.06e-07	5	2885	o
47	156	41	6.63781	1.20433	4.41187	8.82354	84.7724	139.189	17.5867	0.730381	0.337936	0.0962295	0.751812	0.675384	2.158	0.711051	38.0453	1384.69	0.886102	1.11487	0.751812	0.392115	0.227923	0.499328	0.0622306	1.73913	0.312859	2.26548	0.547826	37.7739	1365.76	0.862726	1.26734	1.73913	0.509454	0.0543263	0.261393	5.12e-07	5	564	o
48	271	74	11.4066	5.3379	2.72709	20.2279	391.999	153.499	43.0136	0.977798	-1.01328	0.0256101	2.29926	0.759201	5.77424	0.522585	36.4067	1257.32	1.18565	1.65679	2.29926	0.569807	0.203038	0.558837	0.0182297	6.20896	0.392217	6.10787	0.341447	35.9204	1222.28	1.16329	1.79116	6.20896	0.7349	0.0767099	0.364886	5.84e-07	4	676	o
49	46	19	3.39626	0.278622	2.8596	3.86188	173.903	138.393	8.24003	0.498741	1.2829	0.1636	0.493243	0.503299	1.49652	0.769595	40.0203	1549.33	0.677663	0.837814	0.493243	0.325473	0.140146	0.344409	0.125	1.2	-0.0778443	1.55667	0.6	40.2	1568.19	0.612614	0.923678	1.2	0.432156	0.00884123	0.0903834	5.77e-07	4	535	o
50	186	42	7.30641	0.98294	5.45176	9.30477	987.255	143.289	18.1746	0.627843	-0.381071	0.0570839	1.38681	0.760009	3.88929	0.617629	35.5877	1202.71	1.05455	1.38247	1.38681	0.493762	0.250892	0.572187	0.049705	3.30872	0.391925	3.72065	0.477637	35.4295	1194.29	0.98083	1.44819	3.30872	0.631737	0.101792	0.379286	5.76e-07	2	386	o
51	140	38	6.30707	1.25101	4.50707	8.35073	182.446	147.031	17.3157	0.780672	-1.49259	0.0561133	1.06707	0.733131	2.99925	0.64939	37.4451	1334.99	1.00258	1.30769	1.06707	0.440561	0.232898	0.539967	0.0394477	2.66667	0.405143	3.24143	0.464253	37.453	1336.27	0.984283	1.4433	2.66667	0.573616	0.0810575	0.338809	5.93e-07	4	535	o
52	476	102	13.4468	5.60933	1.26181	24.6617	359.712	157.31	46.8479	0.915017	-0.602385	0.0460893	1.43968	0.784594	4.34178	0.631321	36.1427	1238.44	1.12107	1.49603	1.43968	0.500084	0.252683	0.592652	0.0322642	3.82152	0.457583	4.52268	0.453783	35.8268	1216.37	1.09779	1.64606	3.82152	0.661751	0.0879879	0.374941	5.91e-07	3	3314	o
53	225	64	9.80851	4.41275	1.83938	17.0709	517.415	150.365	37.1318	0.969753	0.528699	0.0268273	2.32439	0.735996	5.4022	0.513027	36.9349	1294.61	1.16722	1.63948	2.32439	0.565535	0.188176	0.537237	0.0213928	6.16265	0.33686	5.64657	0.352498	36.4157	1257.78	1.12606	1.7442	6.16265	0.743717	0.0649464	0.332396	5.92e-07	2	468	o
54	130	46	6.60811	2.26268	2.9665	10.7388	662.542	144.433	21.3441	0.916303	-0.123662	0.0343595	2.06818	0.657241	4.01696	0.513128	37.5182	1337.54	1.08276	1.51989	2.06818	0.533166	0.171781	0.498451	0.0389031	5.02381	0.143271	3.93197	0.388871	36.7143	1284.47	0.968466	1.45763	5.02381	0.683297	0.0834755	0.34532	6.17e-07	4	1348	o
55	191	72	7.91905	2.55874	1.9343	12.6279	678.249	153.213	22.2109	0.713863	0.901744	0.0425034	1.73502	0.735118	4.27507	0.587085	38.4322	1405.29	1.09685	1.50469	1.73502	0.528523	0.207803	0.542734	0.0290861	5.03425	0.382088	5.07359	0.442843	38.1438	1383.66	1.0979	1.63943	5.03425	0.722414	0.0713091	0.337888	6.22e-07	4	1348	o
56	98	42	5.30354	1.3605	2.98769	7.66393	578.966	151.576	14.1223	0.637604	0.808988	0.0587378	1.18297	0.690196	2.90922	0.62429	39.0189	1453.76	0.975416	1.30933	1.18297	0.453039	0.199436	0.501771	0.0395918	3.88571	0.172102	3.34673	0.44618	38.8857	1444.29	0.954339	1.46161	3.88571	0.665677	0.0427276	0.248638	6.09e-07	5	1308	o
57	357	97	13.2452	6.35961	2.46566	24.7656	709.284	151.288	49.9847	0.979245	-0.276023	0.0389116	1.83294	0.814618	5.94369	0.598242	36.3587	1255.07	1.18582	1.59235	1.83294	0.543847	0.266263	0.621949	0.0259017	5.223	0.511714	6.3483	0.442074	36.3449	1253.55	1.16854	1.74246	5.223	0.731493	0.141973	0.483507	6.21e-07	4	1348	o
58	144	50	7.03002	3.11107	1.39284	11.9641	827.899	150.332	26.613	0.958783	-0.164621	0.0751822	0.95723	0.614082	2.2402	0.641141	38.3503	1407.05	0.89306	1.17701	0.95723	0.401372	0.180111	0.455879	0.0634921	2.31429	0.0949079	2.27848	0.471429	38.219	1400.88	0.828103	1.26799	2.31429	0.529922	0.0429643	0.232707	6.37e-07	2	397	o
59	191	47	7.6446	2.09576	4.30955	11.1869	1109.45	155.461	22.9006	0.874019	-0.834972	0.108995	0.530191	0.740456	2.02139	0.759647	39.5493	1500.88	0.854057	1.03089	0.530191	0.336878	0.281598	0.535453	0.0824029	1.15068	0.440485	2.02829	0.630137	39.3836	1490.55	0.814365	1.11124	1.15068	0.445547	0.0950633	0.324007	4.38e-07	2	832	o
60	205	55	8.80059	3.35022	2.93229	13.9934	47.4852	159.694	30.3409	0.945315	0.979086	0.0147791	4.69081	0.748261	10.3168	0.393611	31.8245	963.534	1.31292	1.89832	4.69081	0.69232	0.179589	0.55893	0.0129643	16.5128	0.268171	12.2819	0.240529	31.0256	912.536	1.29482	1.95203	16.5128	0.933486	0.11221	0.45508	4.7e-07	5	969	o
61	79	34	4.57262	1.26483	2.50121	6.74037	665.522	154.518	12.8989	0.736199	0.567754	0.109252	0.775591	0.512573	1.7956	0.697244	41.2638	1640.97	0.784592	1.03171	0.775591	0.390111	0.129726	0.365174	0.11763	1.11905	0.101706	1.62287	0.611905	40.6429	1600.03	0.659627	0.989767	1.11905	0.421585	0.0553365	0.234034	6.22e-07	4	1348	o
62	262	62	9.74547	3.85144	3.79923	15.9974	1163.98	163.4	34.5292	0.949894	-1.02545	0.0278976	2.01816	0.786478	5.72588	0.556112	35.2126	1174.75	1.18513	1.63046	2.01816	0.552559	0.228921	0.586457	0.0222722	5.16509	0.434295	5.56519	0.399257	35.2028	1174.25	1.12707	1.71729	5.16509	0.713035	0.0884738	0.383374	3.77e-07	2	641	o
63	302	64	10.205	3.67278	4.74614	15.993	147.831	166.729	34.8112	0.939765	-1.09403	0.0373251	1.55027	0.812665	5.1377	0.606259	34.3163	1113.84	1.16754	1.54181	1.55027	0.5088	0.278507	0.626727	0.027064	3.928	0.557345	5.43686	0.443951	33.888	1085.47	1.15187	1.67247	3.928	0.665647	0.124094	0.445536	6.02e-07	3	527	o
64	541	94	13.4203	3.84352	7.83848	21.3002	485.174	172.537	40.2614	0.887664	1.46996	0.0518201	1.0414	0.786476	3.43859	0.649277	38.5766	1416.42	1.05708	1.37397	1.0414	0.436528	0.258652	0.578907	0.0344546	2.87526	0.438273	3.55931	0.47307	38.4905	1410.87	1.02703	1.543	2.87526	0.605859	0.0763129	0.339448	5.96e-07	2	916	o
65	319	72	10.692	4.35293	2.31495	17.9945	879.49	163.711	37.3384	0.937462	0.363702	0.0514975	1.89991	0.730273	4.52192	0.590421	34.154	1105.52	1.0885	1.46376	1.89991	0.553381	0.21984	0.550811	0.0394665	5.60536	0.279632	4.89062	0.458373	34.0268	1096.68	1.06128	1.57018	5.60536	0.737084	0.0659421	0.318651	6.61e-07	4	1084	o
66	388	78	11.6078	4.01305	3.08871	18.6204	596.184	168.33	37.1846	0.916902	0.853807	0.0508013	0.905941	0.838681	3.80792	0.676025	38.0559	1377.01	1.08722	1.37077	0.905941	0.416294	0.316655	0.634764	0.0337877	2.56774	0.559215	3.9127	0.500552	37.6774	1349.97	1.05924	1.54449	2.56774	0.585745	0.118744	0.420885	6.19e-07	5	1308	o
67	514	89	13.0944	4.28457	4.54691	20.6387	200.806	170.963	41.0164	0.870227	0.0772901	0.026895	1.9942	0.860736	8.1598	0.563847	31.7928	957.06	1.29013	1.70094	1.9942	0.556288	0.316539	0.687404	0.0175878	6.22222	0.590434	8.59612	0.394727	31.3968	931.393	1.27655	1.87588	6.22222	0.76171	0.138334	0.493249	6.23e-07	4	990	o
68	110	43	5.66893	1.65839	1.86061	8.47549	900.947	166.018	16.1434	0.745347	-0.151256	0.0562462	1.42424	0.671959	3.17083	0.641598	37.292	1323.74	1.00868	1.339	1.42424	0.50567	0.213556	0.523401	0.0516983	2.0411	0.447658	2.84767	0.536422	36.726	1284.71	0.957884	1.37746	2.0411	0.540064	0.0910964	0.35099	6.66e-07	5	1084	o
69	72	35	4.432	1.32289	2.05813	6.50551	294.533	170.139	12.6781	0.724207	1.46695	0.037268	2.16372	0.63549	3.96798	0.528761	36.5442	1269.05	1.057	1.47352	2.16372	0.551334	0.176187	0.497752	0.0337359	6.85714	0.138101	4.97793	0.36659	35.9184	1225.41	1.04206	1.53425	6.85714	0.724226	0.0994985	0.385237	6.11e-07	3	1176	o
70	82	32	4.96965	1.79105	2.03125	7.62814	782.063	170.953	16.995	0.927929	-0.393267	0.131509	0.818519	0.405734	1.68868	0.692963	39.1519	1477.38	0.740307	0.984097	0.818519	0.401483	0.0817527	0.283654	0.0945455	1.6	0.0142566	1.81157	0.527273	39.0909	1475.12	0.705121	1.08987	1.6	0.456041	0.0492402	0.231374	6.36e-07	1	337	o
71	305	76	10.6797	4.9234	2.0696	18.2546	949.79	177.064	41.4062	0.962269	-0.329452	0.0298454	2.14273	0.76456	5.55046	0.531042	34.7173	1141.35	1.17197	1.59774	2.14273	0.55966	0.221213	0.572653	0.019755	6.7479	0.33367	6.06348	0.366217	34.3866	1118.62	1.14324	1.77046	6.7479	0.769555	0.0676771	0.341518	6.74e-07	4	1202	o
72	236	55	9.03728	2.91447	3.97455	13.6587	62.2708	182.142	28.7382	0.915719	0.99576	0.034999	2.69395	0.771263	6.88875	0.521971	32.0368	972.808	1.18314	1.62022	2.69395	0.612369	0.233914	0.59073	0.0300909	7.96392	0.379196	7.4142	0.381727	31.5206	940.07	1.14995	1.70606	7.96392	0.806566	0.0966113	0.398777	5.07e-07	6	969	o
73	450	93	13.4558	5.72778	4.70591	23.4598	274.822	192.457	48.255	0.965466	1.26501	0.0724693	1.081	0.76622	3.312	0.672168	35.0883	1168.79	1.02033	1.30456	1.081	0.459155	0.280675	0.588931	0.0636466	2.60773	0.373943	3.08267	0.550286	34.547	1134.51	0.949538	1.39662	2.60773	0.612716	0.0714695	0.313588	6.21e-07	5	762	o
74	105	34	5.5272	1.39023	3.08501	7.93278	898.162	178.684	16.195	0.831577	0.616504	0.0871501	0.829609	0.647209	2.17578	0.692458	39.2709	1479.11	0.862171	1.10732	0.829609	0.404626	0.201361	0.468602	0.0721876	1.45455	0.327091	2.08079	0.584416	39.039	1463.99	0.814302	1.16314	1.45455	0.483902	0.0476175	0.234855	6.83e-07	4	1084	o
75	520	80	13.3311	3.85094	6.94813	19.5896	1460.24	191.202	39.9984	0.88134	-0.865321	0.0284616	1.76048	0.865491	7.54407	0.593211	32.9141	1026.01	1.2661	1.66609	1.76048	0.535766	0.31522	0.681107	0.020581	4.92099	0.615936	7.40648	0.44597	32.6005	1004.04	1.2422	1.81166	4.92099	0.720149	0.142012	0.491834	2.32e-07	2	1693	o
76	722	116	14.8744	4.05225	6.71943	20.76	1207.94	200.515	41.3477	0.735953	1.06283	0.0543051	0.858845	0.845394	3.77752	0.700633	37.0622	1303.94	1.09437	1.37484	0.858845	0.41953	0.330755	0.648125	0.0400476	2.15894	0.584587	3.59855	0.564113	36.8278	1288.5	1.04709	1.51085	2.15894	0.572083	0.132484	0.439254	3.99e-07	3	1605	o
77	247	67	9.521	4.00813	3.48797	16.1111	19.4386	198.205	35.1089	0.962894	1.36356	0.0584797	1.28114	0.691555	3.07677	0.640571	36.1406	1241.88	1.00007	1.32936	1.28114	0.484595	0.207427	0.514616	0.0481977	3.30851	0.211639	3.09835	0.48694	35.5745	1205.43	0.928448	1.41472	3.30851	0.643728	0.0399423	0.236702	4.17e-07	4	630	o
78	320	60	9.66672	1.57429	6.40126	11.8438	977.625	195.347	25.4724	0.736304	0.143087	0.0395193	1.13316	0.874347	5.50911	0.652248	35.0416	1164.25	1.169	1.48239	1.13316	0.460802	0.353267	0.686008	0.0289395	3.74729	0.606646	5.76326	0.479547	34.8375	1151.15	1.13525	1.61217	3.74729	0.670047	0.173912	0.514205	6.95e-07	3	1202	o
79	238	50	8.65889	1.92543	5.45311	11.8599	233.449	199.747	24.1868	0.839537	0.866984	0.0694328	0.926744	0.793518	3.24413	0.687326	35.5151	1196.51	1.04109	1.30499	0.926744	0.429243	0.306631	0.613698	0.0468555	2.28061	0.480909	3.19673	0.528648	35.301	1182.39	1.00981	1.45081	2.28061	0.572698	0.100601	0.377434	6.31e-07	5	994	o
80	90	29	4.98508	0.966945	3.59217	6.72414	75.3424	198.79	13.8614	0.783484	1.20546	0.0477406	1.45277	0.673066	3.22181	0.578502	36.7818	1286.35	1.0198	1.40474	1.45277	0.471884	0.183798	0.497465	0.0379122	4.13043	0.198541	3.57682	0.408322	36.7101	1283.59	0.969262	1.50351	4.13043	0.649631	0.0906389	0.364726	5.31e-07	5	969	o
81	271	73	8.71298	2.78078	0.647903	12.6006	1169.47	206.371	23.4589	0.534017	-1.51806	0.0812564	0.709072	0.765009	2.50872	0.713034	39.0886	1460.89	0.936783	1.17058	0.709072	0.378053	0.275678	0.558771	0.0581228	1.69417	0.409143	2.43366	0.56068	38.8495	1444.59	0.894983	1.29903	1.69417	0.509328	0.0739445	0.308108	4.63e-07	4	767	o
82	404	89	13.107	5.40727	5.01362	22.3459	356.141	216.82	46.3415	0.964706	1.22251	0.0395778	1.56284	0.837463	5.80764	0.613565	33.959	1093.13	1.16483	1.52442	1.56284	0.519112	0.298374	0.643505	0.0274961	4.65257	0.540939	6.06749	0.471044	33.565	1066.07	1.15426	1.69252	4.65257	0.704018	0.117157	0.435804	5.86e-07	2	738	o
83	54	22	3.78214	0.849881	2.02719	5.08299	588.423	198.459	10.8939	0.791718	0.45324	0.0890144	1.14943	0.436382	2.01969	0.618391	40.1149	1547.26	0.817017	1.13158	1.14943	0.43878	0.110552	0.352172	0.0665306	2.6	-0.0965743	2.18551	0.454286	40.0286	1543.62	0.766856	1.22678	2.6	0.55211	0.056679	0.262793	6.16e-07	4	110	o
84	499	94	14.3611	5.96482	3.37822	25.1296	1049.62	215.239	50.8545	0.94914	0.76	0.026652	2.01477	0.827287	6.83272	0.565908	33.1023	1035.79	1.2515	1.68265	2.01477	0.556687	0.27472	0.644078	0.0200778	5.20804	0.547777	6.75827	0.414066	33.0047	1028.67	1.21092	1.80402	5.20804	0.722973	0.120053	0.453643	6.66e-07	1	879	o
85	288	65	10.8432	4.38225	4.1108	18.1932	48.9054	213.453	38.3738	0.961079	0.86862	0.0241058	2.48109	0.793412	7.00493	0.514661	32.9195	1025.57	1.23303	1.69863	2.48109	0.583262	0.237686	0.60628	0.0175263	7	0.407874	6.9109	0.363727	31.9412	962.75	1.18233	1.83797	7	0.780926	0.0842781	0.386415	4.78e-07	5	956	o
86	78	28	4.68857	1.1713	2.8665	6.53035	1468.45	208.482	14.057	0.854361	-0.963389	0.0641642	1.26923	0.593056	2.55947	0.600769	38.8462	1442.27	0.934461	1.26871	1.26923	0.455359	0.15376	0.436449	0.0741966	2.78261	0.0037225	2.3965	0.466496	38.3913	1416.16	0.796611	1.20245	2.78261	0.590681	0.0523258	0.250133	2.47e-07	2	1693	o
87	183	49	7.94955	2.40071	3.3837	11.8287	249.089	214.137	24.51	0.897013	0.851793	0.0240248	2.41444	0.765596	6.15017	0.50941	33.6515	1070.81	1.20735	1.66016	2.41444	0.577991	0.228977	0.590785	0.0245467	7.0625	0.341	6.35849	0.355095	33.2569	1044.85	1.15582	1.70026	7.0625	0.765836	0.0907343	0.386292	6.23e-07	4	994	o
88	268	70	9.77339	3.44571	3.86108	15.5442	434.521	219.496	32.0307	0.916021	1.36466	0.0236836	3.44573	0.777238	8.73413	0.469427	32.9189	1029.59	1.26295	1.74908	3.44573	0.648375	0.249824	0.62695	0.0179492	10.6215	0.353305	9.21213	0.33447	32.4346	995.958	1.22992	1.84876	10.6215	0.861528	0.0985433	0.417592	5.76e-07	3	857	o
89	64	24	4.08	0.636936	2.87772	5.22315	144.156	216.982	10.6388	0.657834	0.309523	0.103373	0.990566	0.539121	2.07465	0.663208	38.3679	1414.35	0.80408	1.07378	0.990566	0.43225	0.14118	0.387946	0.12223	2.15789	0.0182735	2.09903	0.521053	37.8421	1380.7	0.714461	1.0263	2.15789	0.540125	0.0401729	0.202982	6.11e-07	2	243	o
90	185	48	7.68835	2.04814	4.47989	11.2058	263.056	230.808	22.2691	0.856911	0.900044	0.0550727	1.26493	0.755137	3.58293	0.631943	36.0459	1234.79	1.03563	1.36839	1.26493	0.474889	0.244318	0.562777	0.0398341	3.42361	0.370234	3.71816	0.457991	35.8264	1219.78	1.00781	1.48884	3.42361	0.641185	0.0792557	0.340029	6.08e-07	4	994	o
91	94	30	5.04271	0.976953	2.69258	6.5	568.347	230.9	13.7902	0.74369	1.42812	0.0662843	1.13707	0.67707	2.76055	0.633333	38.9626	1450.4	0.956149	1.26941	1.13707	0.448005	0.19812	0.493531	0.0442604	3	0.265749	3.0429	0.455656	38.5385	1419.09	0.936404	1.40826	3	0.590752	0.0615377	0.292458	5.99e-07	2	218	o
92	90	28	4.92356	0.488004	3.85714	5.75876	979.91	229.953	11.7991	0.524126	1.13129	0.091568	0.760518	0.691022	2.2307	0.701294	38.7735	1439.32	0.890028	1.13431	0.760518	0.387943	0.217167	0.491371	0.0679523	1.62121	0.395247	2.34039	0.55303	38.9545	1455.42	0.853665	1.23904	1.62121	0.483491	0.0937754	0.338777	7.66e-07	5	209	o
93	214	55	9.10978	3.65157	3.6464	14.92	62.9446	241.128	32.4622	0.958741	0.773699	0.0192396	2.9004	0.783738	7.70575	0.482447	33.5777	1068.29	1.26101	1.77645	2.9004	0.610385	0.217433	0.593028	0.0155069	8.88889	0.374681	8.10748	0.333336	32.4444	995.038	1.21149	1.87044	8.88889	0.819175	0.125243	0.470242	4.95e-07	3	956	o
94	402	84	12.7146	5.30209	4.03113	21.5928	1240.69	246.698	45.13	0.960673	-0.903644	0.0553008	0.973937	0.811324	3.58098	0.667764	37.4609	1333.56	1.07123	1.36674	0.973937	0.431375	0.290945	0.609982	0.0464805	2.35385	0.523242	3.46859	0.5321	37.2708	1321.64	1.02001	1.46312	2.35385	0.584033	0.115013	0.404368	4.53e-07	2	700	o
95	341	74	10.9648	4.23421	4.65785	17.8217	445.868	249.286	38.5528	0.944407	1.25715	0.0204275	3.33117	0.811742	9.84735	0.481236	30.97	911.644	1.31223	1.8204	3.33117	0.643735	0.244284	0.630429	0.0168185	9.81784	0.419663	9.45875	0.316319	30.3011	867.787	1.2534	1.9005	9.81784	0.835051	0.102384	0.430602	5.54e-07	3	857	o
96	319	68	11.4796	4.68677	3.98942	18.9288	683.844	247.419	40.2001	0.963516	-0.885248	0.0446833	1.23673	0.782488	3.84289	0.632166	37.7955	1357.15	1.09373	1.43855	1.23673	0.469014	0.25775	0.588769	0.0333664	2.92213	0.475602	3.78618	0.489383	37.4467	1332.24	1.05969	1.56275	2.92213	0.616147	0.0921701	0.374366	6.24e-07	4	713	o
97	81	27	4.86159	1.21718	2.9929	6.65235	1194.09	238.447	14.2509	0.857317	-0.852391	0.354604	0.308824	0.38488	1.25103	0.845588	41.6029	1689.72	0.505175	0.598141	0.308824	0.268462	0.111745	0.261432	0.246305	0.540984	0.202614	1.33922	0.768852	41.6557	1689.69	0.559812	0.74435	0.540984	0.348923	0.0350367	0.16185	4.96e-07	4	1605	o
98	144	42	7.0995	2.5783	2.96359	11.1536	122.861	242.66	23.682	0.937857	0.906238	0.0846487	0.967807	0.605271	2.22591	0.670624	38.0423	1384.5	0.886351	1.16733	0.967807	0.428213	0.167338	0.438161	0.0804549	1.80412	0.130045	2.03691	0.529472	37.5979	1357.74	0.782258	1.18252	1.80412	0.497589	0.0474524	0.23634	5.84e-07	2	375	o
99	122	40	6.04434	1.93803	3.4	9.14112	418.394	244.769	19.7178	0.907385	-1.53267	0.0386789	1.84248	0.699375	4.06442	0.550976	38.1384	1385	1.06306	1.46973	1.84248	0.53017	0.193698	0.519967	0.0336668	6.12791	0.163392	4.66235	0.394133	37.7326	1357.11	1.00943	1.53442	6.12791	0.720797	0.13071	0.439462	5.55e-07	3	344	o
100	293	80	11.3541	5.10929	3.16892	20.2409	640.387	250.047	41.0825	0.961877	0.79503	0.0927721	0.715128	0.708257	2.22561	0.724951	40.6464	1584.2	0.897037	1.13259	0.715128	0.388382	0.229296	0.504204	0.0691617	1.49767	0.426106	2.30484	0.602134	40.586	1580.29	0.879991	1.25286	1.49767	0.501498	0.0696974	0.294112	6.12e-07	3	1387	o
101	293	62	9.52716	2.89912	2.9385	14.3838	827.457	244.143	29.3983	0.849342	-0.0699058	0.0250481	2.2238	0.836731	7.81022	0.537794	33.3569	1055.53	1.25527	1.69111	2.2238	0.57132	0.277267	0.647908	0.0201901	7.26809	0.484776	8.05333	0.360496	32.766	1015.84	1.22402	1.79862	7.26809	0.786468	0.101169	0.417626	7.12e-07	1	848	o
102	87	33	5.01588	1.64525	2.43351	7.60866	515.473	244.262	16.5841	0.906972	1.30875	0.0536504	1.74138	0.507846	2.76914	0.543103	38.3414	1403.13	0.954327	1.33509	1.74138	0.505611	0.138354	0.424257	0.0420135	4.82258	-0.0541639	3.2874	0.398869	38.2097	1396.91	0.89229	1.43611	4.82258	0.687189	0.0508607	0.268715	5.75e-07	2	870	o
103	396	90	13.1502	6.05692	3.59274	23.2632	342.239	260.551	50.0179	0.976362	1.14072	0.0496357	1.12412	0.795833	3.75296	0.648317	37.392	1328.18	1.0837	1.41687	1.12412	0.452326	0.265841	0.593591	0.0340487	2.96117	0.474797	3.81907	0.470962	37.0453	1304.52	1.04244	1.56769	2.96117	0.609889	0.0853055	0.361072	5.51e-07	2	830	o
104	233	50	8.15635	1.04861	5.74233	10.0943	942.002	248.362	20.1985	0.543031	-1.53174	0.0367641	3.4071	0.814737	10.1953	0.504424	29.8118	848.905	1.25434	1.69877	3.4071	0.651561	0.272667	0.644284	0.0291845	10.4762	0.406204	9.82137	0.372035	29.0159	798.552	1.19964	1.72218	10.4762	0.828239	0.131848	0.464544	8.08e-07	5	2069	o
105	128	53	6.68138	2.53364	3.07703	11.936	723.217	252.422	21.9497	0.925366	-1.25255	0.13464	0.515513	0.640115	1.71622	0.768019	41.5752	1667.12	0.773569	0.939897	0.515513	0.336451	0.218511	0.453782	0.0920369	1.28261	0.241051	1.84499	0.632609	41.4783	1661.27	0.745378	1.08565	1.28261	0.478513	0.0497333	0.232088	6.4e-07	3	2074	o
106	63	23	4.05196	0.496987	3.20798	4.86199	1376.26	250.708	10.2423	0.630789	0.245242	0.216799	0.435407	0.433663	1.38441	0.799522	41.3636	1662.35	0.605254	0.749186	0.435407	0.317625	0.116707	0.297781	0.250164	0.564103	0.0272109	1.28994	0.748718	41.3846	1672.31	0.49802	0.686331	0.564103	0.344513	0.00288919	0.0445403	3.68e-07	4	1083	o
107	382	79	11.8538	4.45869	5.25903	20.0231	530.294	272.899	39.9846	0.941594	1.28152	0.0275294	1.66403	0.852252	6.63129	0.579581	34.6482	1136.86	1.24157	1.63267	1.66403	0.518268	0.306553	0.668044	0.0181945	5.25974	0.54824	6.82139	0.401115	34.013	1093.5	1.21851	1.81691	5.25974	0.725415	0.1167	0.449024	5.66e-07	2	870	o
108	476	99	14.9102	6.95638	3.55639	25.76	758.311	277.556	57.881	0.976073	-0.866528	0.0264626	2.45133	0.812831	7.54843	0.53096	32.2497	985.273	1.24116	1.69866	2.45133	0.591548	0.243047	0.612353	0.0179359	6.98695	0.461197	7.48377	0.374495	31.6815	947.746	1.20528	1.85574	6.98695	0.787609	0.0719462	0.359629	6.82e-07	1	2074	o
109	239	71	11.1355	5.46807	1.43965	20.2057	1357.3	271.94	44.784	0.983557	-0.805657	0.059279	1.19053	0.649907	2.70031	0.637743	39.3337	1477.45	0.969176	1.30723	1.19053	0.463056	0.166769	0.460075	0.0530737	2.40361	0.289285	2.69098	0.519383	39.1386	1465.74	0.910528	1.35771	2.40361	0.579223	0.0455939	0.247755	3.99e-07	3	1083	o
110	136	50	6.22774	1.6295	2.20907	9.0377	203.842	264.67	15.0867	0.361913	0.643262	0.12932	0.569231	0.720716	2.01909	0.776044	40.811	1602.42	0.824542	1.01613	0.569231	0.362406	0.277622	0.528514	0.0891003	1.69608	0.30455	2.21941	0.622549	40.9314	1612.7	0.812526	1.12246	1.69608	0.525911	0.0602354	0.259494	6.05e-07	2	953	o
111	397	82	11.3046	3.17113	4.94017	17.8903	725.927	276.589	32.1975	0.763233	1.00072	0.0312836	1.45776	0.883041	7.23191	0.605927	35.5187	1199.45	1.2262	1.59997	1.45776	0.498394	0.331323	0.685753	0.0230817	4.01231	0.689288	7.45662	0.460541	35.1508	1173.49	1.21441	1.75235	4.01231	0.684181	0.17208	0.530121	6.56e-07	2	2074	o
112	68	26	4.24801	0.946933	2.45341	5.90469	986.675	264.521	12.1276	0.790456	-0.340239	0.231496	0.577778	0.380952	1.46667	0.759111	38.9333	1469.44	0.616853	0.800101	0.577778	0.358413	0.0876662	0.265953	0.237061	1.09756	-0.0600402	1.5177	0.685366	38.9512	1476.18	0.542837	0.750029	1.09756	0.448721	0.0167259	0.112121	8.32e-07	7	2069	o
113	686	151	24.1037	13.0014	3.42794	46.0086	1413.97	294.138	100.038	0.99519	-0.805374	0.0358724	1.52501	0.789061	4.61481	0.599995	37.5242	1336.48	1.14361	1.54042	1.52501	0.504369	0.238626	0.58415	0.0242357	3.89512	0.480216	4.74686	0.456051	37.519	1336.36	1.11471	1.68586	3.89512	0.670887	0.0839715	0.370633	3.67e-07	4	1211	o
114	265	66	9.33996	3.22884	2.52989	14.9202	936.814	270.952	30.3443	0.890561	-0.662757	0.0421324	2.29281	0.692183	4.72431	0.561669	33.3753	1052.19	1.13258	1.56186	2.29281	0.588464	0.195685	0.536059	0.0361502	5.21739	0.266848	4.55819	0.427063	33.0628	1033.12	1.06117	1.61923	5.21739	0.732213	0.0543892	0.2942	8.45e-07	6	2069	o
115	43	19	3.25968	0.459408	2.01449	3.84643	997.938	268.728	8.47785	0.609082	-1.32745	0.063338	1.28676	0.515743	2.3286	0.586029	37.8456	1369.34	0.895474	1.23259	1.28676	0.440302	0.135427	0.40489	0.056	3.24	0.0238612	2.6596	0.388	38.04	1386.91	0.844356	1.28343	3.24	0.557301	0.0837481	0.325759	8.34e-07	5	2069	o
116	104	34	5.75457	1.96706	2.70364	8.73891	1411.7	272.588	18.8736	0.922973	-0.931201	0.172831	0.559659	0.473596	1.53159	0.754261	41.2585	1647.77	0.68514	0.869216	0.559659	0.347159	0.134771	0.34357	0.189394	0.863636	-0.00655518	1.42901	0.695455	41.1061	1645.36	0.553511	0.793497	0.863636	0.415925	0.0127445	0.100628	3.63e-07	5	476	o
117	111	33	5.60066	0.988899	3.74006	7.27929	1396.23	272.986	15.0405	0.763223	-0.709161	0.057234	1.0625	0.730663	2.97243	0.65625	39.0781	1455.74	1.01359	1.32945	1.0625	0.443646	0.227481	0.537689	0.0539556	1.65333	0.518584	2.71716	0.541333	38.7733	1437.12	0.932793	1.32569	1.65333	0.486443	0.146691	0.435089	3.75e-07	5	476	o
118	422	80	11.8095	3.89428	5.72451	18.4383	201.43	286.884	37.9511	0.916191	-1.40777	0.0506511	1.13724	0.815936	4.08925	0.665475	35.9285	1223.13	1.11603	1.43674	1.13724	0.467182	0.292369	0.623365	0.0329096	3.33604	0.513671	4.42982	0.499647	35.7696	1212.07	1.10427	1.61913	3.33604	0.633477	0.109718	0.413947	5.97e-07	2	953	o
119	40	18	3.13625	0.324476	2.28589	3.65191	664.985	274.079	7.9374	0.589967	0.711529	0.355001	0.365079	0.269657	1.24994	0.81746	41.873	1712.15	0.502573	0.612473	0.365079	0.285021	0.0803981	0.22363	0.258034	0.695652	-0.142857	1.30435	0.704348	42	1726.29	0.457679	0.691101	0.695652	0.363894	0.0722072	0.22462	6.21e-07	3	1387	o
120	307	72	11.2668	4.9117	4.61763	19.4291	596.578	291.234	41.6468	0.967831	1.01194	0.0411933	1.41241	0.817687	4.87358	0.61711	37.438	1332.55	1.12727	1.49835	1.41241	0.493272	0.259706	0.600487	0.0308902	3.60515	0.523387	4.78206	0.479093	37.133	1310.91	1.08606	1.61916	3.60515	0.656896	0.105141	0.405546	5.9e-07	1	907	o
121	65	26	4.29964	1.42091	1.86925	6.32105	1467.48	280.147	14.0727	0.903236	-0.516669	0.142146	0.535545	0.589554	1.65239	0.766351	41.7678	1685.82	0.734265	0.912265	0.535545	0.344938	0.185126	0.412091	0.1225	1.15	0.0564103	1.60938	0.605	41.75	1690.78	0.646531	0.930324	1.15	0.42325	0.0205522	0.138323	3.07e-07	3	675	o
122	74	27	4.48631	1.03402	2.46234	6.12132	1114.24	281.2	13.0357	0.818408	-0.35482	0.0805127	1.18219	0.532506	2.26439	0.62753	38.4534	1415.8	0.877894	1.19493	1.18219	0.453457	0.134297	0.397547	0.10026	2.5625	-0.0536272	2.21604	0.49375	38.1042	1397.44	0.752575	1.07088	2.5625	0.5767	0.0398022	0.206293	7.01e-07	4	490	o
123	264	52	8.7249	0.845479	6.56386	10.2097	948.519	291.707	20.4268	0.414775	0.202025	0.049912	2.48237	0.827706	8.20388	0.554473	30.0902	861.653	1.18834	1.57804	2.48237	0.601317	0.295604	0.649258	0.0365184	7.12385	0.48451	7.90979	0.424266	29.5275	825.467	1.15585	1.66842	7.12385	0.78049	0.133568	0.460895	8.74e-07	10	6732	o
124	357	71	10.5742	2.18696	5.5673	15.2226	898.66	296.095	26.8059	0.722661	-0.574989	0.0393689	1.47776	0.813291	4.95738	0.621639	33.4686	1057.95	1.16383	1.53073	1.47776	0.510277	0.278356	0.624832	0.0263101	4.19016	0.483558	5.05676	0.451493	33.4426	1055.4	1.1415	1.68299	4.19016	0.685592	0.0980252	0.39908	8.53e-07	5	6732	o
125	265	68	8.60485	2.01536	3.57864	12.4279	920.942	295.173	22.2105	0.642823	0.274474	0.0452632	1.36102	0.750425	3.72668	0.622064	35.6826	1207.4	1.07264	1.43927	1.36102	0.486488	0.233015	0.562016	0.0320999	3.75122	0.358129	3.9221	0.445114	35.7805	1214.75	1.04122	1.58413	3.75122	0.652902	0.0722602	0.334633	8.68e-07	8	6732	o
126	230	60	8.40313	2.98393	1.6734	13.4065	69.1827	300.437	25.9082	0.794	1.24144	0.0260171	2.40713	0.804006	7.14084	0.522926	35.3346	1186.15	1.21724	1.68225	2.40713	0.586111	0.23669	0.60283	0.0199398	7.39645	0.42076	7.38462	0.374129	34.4615	1126.73	1.16603	1.79493	7.39645	0.794746	0.138495	0.48414	4.8e-07	3	521	o
127	165	39	6.8649	0.868071	4.68677	8.23792	1137.03	296.335	17.4432	0.646726	0.529539	0.0448805	2.71138	0.789405	7.43742	0.519415	33.8183	1088.39	1.17862	1.604	2.71138	0.611238	0.257294	0.614217	0.038112	7.056	0.421861	7.10234	0.375762	33.216	1047.44	1.12108	1.62122	7.056	0.774839	0.142201	0.468813	6.8e-07	5	238	o
128	91	31	5.36929	1.79405	2.37267	7.99902	1449.52	296.889	17.5104	0.9196	-0.927064	0.157415	0.681967	0.557144	1.76997	0.73377	41.5541	1667.26	0.751402	0.961034	0.681967	0.382365	0.14826	0.37767	0.151665	0.951613	0.210532	1.60269	0.659677	41.629	1679.33	0.667266	0.951992	0.951613	0.417021	0.0588073	0.236745	3.29e-07	5	675	o
129	165	56	7.76823	3.45031	2	13.3417	50.1477	304.349	29.9694	0.964112	1.45763	0.0286538	3.18053	0.711267	6.50773	0.48652	36.2743	1250.31	1.18218	1.68219	3.18053	0.634989	0.171783	0.520606	0.0283004	9.76786	0.249133	7.50438	0.334392	35.2321	1180.17	1.11582	1.67705	9.76786	0.829499	0.124358	0.446532	4.4e-07	2	498	o
130	177	50	7.17869	2.48444	1.18068	11.1747	119.477	301.615	22.5447	0.849273	-1.49519	0.140819	0.608065	0.756391	2.24803	0.752097	40.9113	1608.49	0.859965	1.06344	0.608065	0.366162	0.273564	0.534887	0.107638	1.63158	0.502847	2.64092	0.616232	40.6992	1591.69	0.865122	1.21289	1.63158	0.524422	0.13722	0.404522	5.58e-07	3	1131	o
131	556	87	12.8931	2.41573	6.64293	16.995	1091.38	306.07	31.7054	0.571113	0.0166107	0.0297753	1.54664	0.851484	6.20698	0.601983	32.2629	982.076	1.23399	1.6216	1.54664	0.510141	0.306134	0.665982	0.0206654	4.33194	0.572249	6.06362	0.450383	32.0146	965.83	1.19405	1.7726	4.33194	0.698628	0.120837	0.451498	7.62e-07	5	3165	o
132	178	43	7.0876	0.91771	5.41041	8.54907	991.124	303.194	17.6829	0.631218	-0.570033	0.0707074	1.4	0.734229	3.63384	0.620371	33.9921	1096.79	1.01259	1.33316	1.4	0.492919	0.230178	0.541326	0.0549794	3.58519	0.309302	3.59534	0.459615	33.6296	1074.55	0.953176	1.41032	3.58519	0.646058	0.0813658	0.33577	8.74e-07	8	3165	o
133	425	102	14.5398	7.07541	4.0577	26.937	501.963	323.214	56.3766	0.982147	1.20411	0.0267427	2.50986	0.736371	5.7602	0.509085	34.251	1109.33	1.1934	1.66622	2.50986	0.587905	0.205421	0.563145	0.0186083	7.32749	0.300588	6.23832	0.349939	33.924	1086.87	1.16357	1.82282	7.32749	0.78045	0.0547159	0.312186	5.49e-07	2	645	o
134	87	32	5.00924	1.59353	2.09748	7.55559	419.858	305.71	16.0889	0.896082	1.28741	0.121633	0.786942	0.44893	1.71401	0.701375	40.0997	1549.04	0.768094	1.02231	0.786942	0.397182	0.103675	0.32521	0.0857899	1.85714	0.00182815	1.93027	0.528571	40.2381	1562.63	0.731591	1.11787	1.85714	0.511885	0.0201534	0.150004	5.22e-07	1	271	o
135	153	43	6.56914	1.06446	4.11654	8.60053	1005.63	305.357	16.3825	0.612626	0.121347	0.0363475	1.5653	0.762284	4.29237	0.570819	35.0466	1162.31	1.12457	1.51966	1.5653	0.496075	0.239079	0.581467	0.0259471	4.85039	0.380331	4.9137	0.380717	35.1496	1170.99	1.08814	1.64473	4.85039	0.696313	0.0960457	0.391027	8.65e-07	6	3165	o
136	156	44	6.70741	1.37284	3.88922	9.09239	1113.52	303.855	18.5731	0.765555	-0.215617	0.018497	3.08925	0.821363	9.64675	0.458909	33.0929	1042.67	1.29392	1.7876	3.08925	0.615945	0.260912	0.644312	0.0242899	10.0154	0.469873	10.4462	0.308635	33.2769	1054.03	1.24156	1.71891	10.0154	0.821532	0.187661	0.547274	7.25e-07	6	3165	o
137	398	73	11.1329	3.00224	3.53117	15.7664	950.561	314.064	33.0437	0.825855	-0.572012	0.0348249	1.92691	0.84196	7.0963	0.59013	30.9925	908.59	1.22453	1.61801	1.92691	0.556015	0.30411	0.663523	0.0261635	4.90332	0.574738	6.76506	0.439891	30.6435	885.766	1.18829	1.72943	4.90332	0.719112	0.141642	0.481398	8.85e-07	8	6732	o
138	155	54	6.81471	2.7306	1.53715	11.2707	1027.28	316.012	23.7913	0.905465	-0.638942	0.0689044	1.01336	0.6395	2.40549	0.646756	38.4866	1416.2	0.915436	1.21428	1.01336	0.424631	0.177956	0.459522	0.0539479	2.06731	0.290688	2.45726	0.508654	38.5865	1425.35	0.882641	1.3037	2.06731	0.5293	0.0478421	0.2488	8.47e-07	6	3165	o
139	70	26	4.405	0.95526	2.74401	5.9348	1248.4	311.642	12.6697	0.812301	0.592319	0.0660207	1.53017	0.496354	2.51909	0.586638	39.0991	1463.79	0.899114	1.245	1.53017	0.500473	0.124231	0.389912	0.0724716	2.83721	-0.0262128	2.38237	0.474419	38.6512	1435.02	0.805015	1.16661	2.83721	0.584162	0.0243549	0.168384	5.17e-07	2	144	o
140	113	34	5.70316	1.26192	3.2493	7.73261	914.012	316.387	16.0528	0.802268	-1.27906	0.0860323	0.920308	0.61503	2.1953	0.681748	38.1028	1389.22	0.882461	1.16093	0.920308	0.42537	0.163605	0.432276	0.0693153	1.94505	0.235349	2.27186	0.541758	38.4066	1414.02	0.844936	1.22553	1.94505	0.536673	0.0317952	0.197033	8.75e-07	9	6732	o
141	573	91	14.9749	5.69097	5.72759	24.275	1285.74	326.168	50.7241	0.951285	-0.74935	0.0421461	1.22212	0.843291	4.89932	0.643358	36.1012	1234.94	1.16458	1.50303	1.22212	0.472194	0.313294	0.654104	0.029748	3.23673	0.574811	4.80623	0.482929	35.8449	1217.67	1.12197	1.64737	3.23673	0.635081	0.136541	0.463125	4.78e-07	2	842	o
142	129	40	6.3727	2.0353	3.34608	9.90688	139.358	323.388	20.4008	0.9071	-0.875677	0.0653914	1.06772	0.67179	2.62658	0.650339	38.8059	1437.64	0.961459	1.27867	1.06772	0.444553	0.19368	0.48972	0.0538442	2.42697	0.289211	2.70723	0.497951	38.427	1411.94	0.909858	1.35872	2.42697	0.566042	0.0748393	0.316623	5.77e-07	6	1131	o
143	424	100	13.7139	6.3028	2.1526	24.5812	559.373	339.451	50.1962	0.97134	1.27844	0.0585015	0.935125	0.787211	3.1973	0.684207	38.2313	1391.84	1.02941	1.32005	0.935125	0.431271	0.27444	0.585561	0.0449094	2.41787	0.509137	3.46287	0.531218	38.1009	1382.79	1.01506	1.45223	2.41787	0.58964	0.108685	0.392072	5.8e-07	1	750	o
144	439	71	11.4842	2.28964	6.80283	15.7636	1147.31	325.914	31.3894	0.784862	0.181637	0.038496	1.12179	0.890636	6.12869	0.662362	35.4621	1192.96	1.20475	1.51461	1.12179	0.46327	0.369707	0.704905	0.0268433	2.99202	0.699623	5.98045	0.515951	35.1888	1173.24	1.1843	1.67515	2.99202	0.634165	0.180037	0.531129	6.75e-07	6	1787	o
145	112	34	5.55139	0.975265	3.96623	7.26566	889.845	325.78	14.3816	0.63759	-0.987587	0.0338455	2.10336	0.712369	4.65634	0.525065	35.416	1189.71	1.10588	1.53027	2.10336	0.545973	0.195304	0.530987	0.0312869	4.94805	0.250584	4.30127	0.384539	34.9481	1158.77	1.02877	1.57561	4.94805	0.700211	0.0621971	0.310156	8.6e-07	7	6732	o
146	111	34	5.48492	0.797671	3.88246	6.8653	1071.53	325.673	14.5347	0.693703	-1.32806	0.029634	2.27013	0.783083	6.23272	0.503529	35.1948	1176.05	1.17442	1.60917	2.27013	0.554748	0.229601	0.584149	0.025277	6.77632	0.2915	5.78216	0.332762	34.3289	1115.36	1.11734	1.65596	6.77632	0.759075	0.10003	0.400013	7.9e-07	5	3165	o
147	413	85	11.7547	4.14513	3.28598	19.0852	1184.54	333.468	37.0926	0.849307	-1.2114	0.02301	2.26795	0.879961	10.4468	0.544114	34.5592	1140.92	1.31155	1.76949	2.26795	0.574296	0.295005	0.676692	0.0195859	6.35866	0.652364	10.1456	0.375304	33.9635	1098.61	1.27736	1.87023	6.35866	0.754972	0.140261	0.495788	6.16e-07	2	1787	o
148	623	105	16.6499	7.19128	3.40588	28.6566	718.648	343.617	61.3556	0.969378	0.934857	0.0306286	1.52478	0.854454	6.23815	0.609885	35.2613	1178.43	1.21715	1.60565	1.52478	0.505488	0.305186	0.662667	0.018306	4.57643	0.598289	6.69617	0.432582	35.1657	1171.08	1.21172	1.80897	4.57643	0.697476	0.126174	0.464983	6.93e-07	3	991	o
149	445	76	11.5279	1.55292	8.557	14.8452	92.234	333.879	27.1728	0.526611	0.123105	0.0446475	0.998181	0.864951	4.69562	0.67265	36.1771	1239.91	1.16101	1.46266	0.998181	0.439928	0.345235	0.675884	0.0309062	2.73545	0.623938	4.63697	0.500694	35.8466	1216.59	1.13665	1.64241	2.73545	0.6043	0.143166	0.47301	5.16e-07	4	783	o
150	50	21	3.54822	0.563174	2.24619	4.33124	1473.17	324.939	9.51631	0.69912	-0.246543	0.169573	0.596273	0.409445	1.50484	0.73913	41.4161	1663.69	0.645215	0.834526	0.596273	0.351646	0.0981048	0.287214	0.16409	1	-0.083065	1.46165	0.624138	41.3448	1664.62	0.5555	0.834696	1	0.395599	0.0340418	0.168798	2.89e-07	4	1145	o
151	418	70	11.2444	2.31296	7.88388	15.8199	257.795	334.21	30.9506	0.812993	0.083652	0.0814959	0.63185	0.830334	2.86204	0.755255	37.8659	1365.55	1.00489	1.21891	0.63185	0.374984	0.3504	0.635757	0.0569505	1.34916	0.629545	2.82095	0.613293	37.8296	1363.54	0.983872	1.34932	1.34916	0.480303	0.165222	0.464478	5.81e-07	2	608	o
152	223	50	8.13001	1.61522	4.9994	11.3276	683.227	334.286	22.4808	0.791247	0.552663	0.0462664	1.25654	0.828286	4.65881	0.631228	37.3213	1324	1.11877	1.46946	1.25654	0.47417	0.286189	0.622771	0.0307562	3.73333	0.500595	4.73778	0.449497	37.0667	1306.03	1.08323	1.61863	3.73333	0.649079	0.118544	0.429548	6.57e-07	4	565	o
153	145	42	6.35282	1.04243	4.08921	8.28985	947.354	333.214	16.1921	0.592042	1.29123	0.0200851	2.8913	0.801994	8.30104	0.468432	32.6107	1008.81	1.26586	1.75746	2.8913	0.604953	0.234496	0.610762	0.0202893	8.54545	0.382126	7.91521	0.303747	32.1091	974.298	1.20306	1.74816	8.54545	0.787537	0.128004	0.461132	8.76e-07	7	6732	o
154	355	80	11.2205	4.27411	4.74408	18.7312	780.742	336.728	38.1005	0.941624	-0.422212	0.112292	1.02576	0.799508	3.55811	0.713376	37.1288	1316.2	0.976406	1.25425	1.02576	0.453213	0.281795	0.580761	0.0812596	2.74558	0.499782	3.74439	0.593544	36.9647	1303.7	0.972039	1.39696	2.74558	0.59776	0.127471	0.416175	7.54e-07	3	769	o
155	418	73	11.2807	2.07657	7.27789	15.3724	870.97	339.482	28.7141	0.652735	-0.218155	0.0254081	1.84955	0.857272	7.47929	0.582134	32.2594	984.452	1.26933	1.68142	1.84955	0.541398	0.304806	0.673601	0.0187948	5.07649	0.605176	7.42881	0.430804	31.864	959.474	1.2236	1.80561	5.07649	0.722938	0.149536	0.503091	8.43e-07	5	6732	o
156	239	60	8.19487	1.82129	4.17256	11.1853	961.284	336.455	22.1286	0.686072	-1.12579	0.0281628	2.08333	0.869885	9.00576	0.577542	32.9284	1032.56	1.26426	1.66803	2.08333	0.558918	0.306438	0.673187	0.0226182	4.86022	0.703025	9.18288	0.403108	32.5484	1008.95	1.22618	1.74411	4.86022	0.706247	0.195113	0.560484	8.72e-07	6	6732	o
157	567	96	14.7995	5.57354	6.40991	24.7366	1431.91	344.331	49.2752	0.947426	-0.490169	0.0540161	1.42163	0.819681	4.94199	0.630087	35.1196	1170.9	1.11138	1.44116	1.42163	0.504624	0.2902	0.622004	0.0404541	3.7526	0.51724	4.88661	0.494124	34.8004	1148.86	1.08	1.56784	3.7526	0.672947	0.103126	0.395898	3.29e-07	2	1145	o
158	284	62	9.15559	1.69917	5.92814	12.4712	1025.19	346.791	22.6913	0.549674	-0.171561	0.0357386	1.22687	0.858314	5.32956	0.630769	34.1928	1106.03	1.17855	1.51893	1.22687	0.468684	0.321266	0.663978	0.0235947	3.56723	0.592023	5.37184	0.457357	34.0042	1093.25	1.15111	1.69175	3.56723	0.651591	0.145349	0.482618	8.18e-07	4	890	o
159	489	126	19.2436	10.2455	2.1154	36.3715	425.164	368.397	79.5851	0.993345	0.962935	0.0411177	1.65951	0.688958	3.66766	0.582882	37.2454	1318.14	1.06343	1.46261	1.65951	0.518265	0.180559	0.501953	0.028473	4.36053	0.284363	4.0466	0.409673	37.0553	1305.35	1.03413	1.59357	4.36053	0.679971	0.0400874	0.251216	5.7e-07	2	845	o
160	169	49	7.19312	2.23653	2.16461	11.307	293.373	350.944	21.6644	0.824406	0.703319	0.0725869	1.0017	0.677991	2.55539	0.672619	38.3078	1400.8	0.950382	1.24544	1.0017	0.439609	0.208594	0.501765	0.0531451	2.5303	0.286579	2.77336	0.517983	38.1667	1391.97	0.918749	1.36313	2.5303	0.585425	0.0844094	0.336446	5.76e-07	3	335	o
161	553	117	17.3075	8.53586	4.09688	31.9879	182.089	370.74	67.7274	0.985908	-1.09792	0.0255175	2.01447	0.829813	6.91841	0.554826	34.4995	1127.53	1.24493	1.68256	2.01447	0.552082	0.273581	0.642893	0.0167274	6.0989	0.513202	7.2643	0.376743	34.0462	1096.11	1.22616	1.86695	6.0989	0.749562	0.102884	0.428148	6.24e-07	5	865	o
162	108	36	5.59947	1.36679	2.91548	8.27647	159.659	351.306	16.1973	0.833473	-1.09772	0.11737	0.713896	0.691006	2.15519	0.734605	40.0218	1537.66	0.858644	1.09383	0.713896	0.393691	0.231118	0.498612	0.0805503	1.50725	0.379024	2.21361	0.594203	39.5652	1501.95	0.853388	1.19872	1.50725	0.497821	0.102145	0.347931	6e-07	5	1102	o
163	154	43	6.83839	1.6062	3.61274	9.82312	894.93	353.363	19.259	0.795904	-0.669257	0.0297345	2.08007	0.779067	5.70748	0.569553	33.6704	1071.98	1.1861	1.61542	2.08007	0.564159	0.251246	0.609385	0.0235225	5.04274	0.445613	5.54803	0.406124	33.4188	1054.07	1.15556	1.69894	5.04274	0.708446	0.131598	0.461346	8.46e-07	6	6732	o
164	214	49	7.90101	1.3127	5.3732	10.1012	1043.95	353.742	20.7865	0.6885	-0.15622	0.0230823	2.61118	0.829073	8.63828	0.50319	30.8036	899.51	1.28131	1.73669	2.61118	0.585821	0.283132	0.660347	0.019308	7.37647	0.501436	8.39772	0.351341	30.2824	866.697	1.22238	1.83909	7.37647	0.789627	0.135014	0.483502	7.87e-07	4	890	o
165	167	40	6.8428	0.89328	5.05501	8.29175	148.059	355.723	15.2134	0.156925	0.99206	0.103747	0.492411	0.796186	2.20799	0.776054	39.2951	1479.4	0.888531	1.05275	0.492411	0.330878	0.335344	0.587943	0.0754035	1.16794	0.488497	2.14167	0.617557	39.0763	1464.68	0.849571	1.16532	1.16794	0.444401	0.107323	0.351847	5.93e-07	5	1102	o
166	470	104	16.2327	7.97078	4.00195	29.6144	403.123	372.565	63.6194	0.986466	0.99793	0.02886	2.1344	0.755708	5.36854	0.538338	34.9349	1154.7	1.18053	1.62521	2.1344	0.558335	0.219078	0.574088	0.0219246	5.59207	0.346478	5.27841	0.371335	34.1756	1103.71	1.12738	1.75076	5.59207	0.724866	0.0668746	0.337762	5.75e-07	2	776	o
167	215	48	7.94622	1.41835	5.74747	10.6003	672.198	356.104	21.546	0.75804	0.144398	0.027045	2.30491	0.814822	7.22351	0.538787	34.0052	1096.2	1.2392	1.68468	2.30491	0.578621	0.250175	0.618289	0.0220756	6.86391	0.445507	7.18935	0.373194	33.3846	1053.86	1.19811	1.75388	6.86391	0.773095	0.113676	0.43651	6.58e-07	4	1337	o
168	195	48	7.26556	1.54077	2.65443	9.18355	1133.55	358.792	17.7312	0.459396	-0.872086	0.0724313	0.853026	0.736067	2.61599	0.673775	39.2738	1474.32	0.949974	1.2157	0.853026	0.397869	0.254844	0.546686	0.0682918	1.95804	0.344767	2.49416	0.516084	38.951	1453.87	0.874096	1.23466	1.95804	0.518675	0.0814913	0.315554	6.74e-07	3	707	o
169	192	48	7.48441	1.59672	4.61165	10.5838	882.202	362.626	20.3542	0.729842	-1.35118	0.0318321	1.67401	0.853071	6.69664	0.576263	34.3877	1122.32	1.20324	1.57981	1.67401	0.516799	0.298714	0.652529	0.0230574	5.03497	0.537761	6.44628	0.394233	33.8182	1082.62	1.17048	1.7215	5.03497	0.713303	0.120865	0.445697	8.31e-07	5	6732	o
170	367	63	10.3603	1.14504	7.81056	12.5782	974.413	362.959	24.4446	0.406816	-0.532105	0.0276647	2.33333	0.891736	11.7761	0.546384	28.9235	801.641	1.33961	1.74387	2.33333	0.587239	0.349839	0.722915	0.0189225	7.26814	0.642086	11.1535	0.37719	28.4543	770.034	1.31226	1.88476	7.26814	0.784031	0.188056	0.569011	8.2e-07	3	6732	o
171	45	20	3.3408	0.631716	2.2	4.17612	1116.05	357.706	9.3326	0.745133	-0.0326459	0.124187	0.713287	0.456436	1.65612	0.685315	41.1608	1635.33	0.745298	0.978334	0.713287	0.34886	0.118429	0.340403	0.189981	1.08696	0.0792634	1.59026	0.665217	41.1739	1646.52	0.612279	0.829671	1.08696	0.44884	0.00809762	0.0819937	6.97e-07	3	707	o
172	629	110	17.0475	7.67532	4.99525	29.7924	508.806	372.17	62.8915	0.976674	0.536865	0.056089	1.38956	0.773651	4.06951	0.633464	35.4707	1193.33	1.08407	1.42068	1.38956	0.499624	0.266994	0.595411	0.040474	3.78977	0.383242	4.07233	0.489257	35.1458	1171.1	1.04884	1.56247	3.78977	0.674578	0.067519	0.32161	5.9e-07	2	997	o
173	256	70	9.56953	3.75723	2.08914	16.4341	776.474	363.392	32.9058	0.926158	0.184266	0.038611	1.50442	0.755308	4.07412	0.597918	34.8119	1146.39	1.11335	1.4888	1.50442	0.50163	0.229116	0.565431	0.0260881	4.5099	0.341267	4.42316	0.419727	34.7178	1141.13	1.07336	1.6465	4.5099	0.689509	0.0889747	0.377018	7.57e-07	4	668	o
174	183	42	7.39923	1.56355	4.867	10.0533	135.795	366.319	20.4037	0.821885	-1.02697	0.42376	0.227829	0.543334	1.24945	0.88792	41.8028	1707.34	0.492133	0.563999	0.227829	0.234573	0.227312	0.366973	0.315688	0.403974	0.342189	1.30706	0.821854	41.9404	1714.12	0.548362	0.689146	0.403974	0.312627	0.0869185	0.246375	5.85e-07	6	1102	o
175	98	41	5.35425	1.55471	3.04243	8.81727	795.781	365.723	16.0608	0.829789	0.435156	0.0473725	1.75786	0.638582	3.43189	0.573455	36.2547	1250.03	1.01188	1.39004	1.75786	0.531125	0.174877	0.483581	0.0444356	4.4507	0.217604	3.84428	0.427468	36.0563	1236.83	0.98641	1.41962	4.4507	0.69293	0.0961186	0.365433	7.75e-07	4	668	o
176	40	23	3.11101	0.768139	1.69175	4.42732	669.357	366.236	8.51586	0.620373	-0.75135	0.26106	0.372881	0.401705	1.31162	0.813559	41.4407	1671.71	0.56481	0.677058	0.372881	0.286839	0.115939	0.282756	0.151042	1.04167	-0.112141	1.46832	0.629167	41.5417	1680.22	0.561357	0.857815	1.04167	0.416155	0.0269965	0.15232	6.61e-07	3	1337	o
177	139	39	6.4904	1.67775	3.90047	9.34843	818.026	375.671	19.3619	0.861029	-0.969953	0.0353066	1.60825	0.751077	4.23041	0.559588	36.0454	1231.59	1.11284	1.50904	1.60825	0.494901	0.220411	0.55847	0.0299556	4.54808	0.272216	4.12461	0.389484	35.8558	1220.87	1.02874	1.56986	4.54808	0.67397	0.0670627	0.321261	7.88e-07	3	680	o
178	98	35	5.43827	1.77623	3.00218	8.42353	597.431	378.008	17.7646	0.907757	0.432561	0.11	0.644377	0.633257	1.87851	0.721581	40.4802	1574.6	0.835179	1.0462	0.644377	0.354819	0.208141	0.464509	0.0834262	1.53731	0.171598	1.92788	0.589552	40.3731	1570.87	0.766383	1.1277	1.53731	0.503826	0.0201196	0.150528	6.24e-07	1	402	o
179	547	109	16.6795	8.06906	4.01325	29.992	191.272	399.18	65.1008	0.983939	-1.01674	0.0551293	0.90603	0.816628	3.47046	0.689829	37.9764	1371.41	1.0652	1.34986	0.90603	0.424983	0.304113	0.619487	0.0372495	2.29545	0.555408	3.58153	0.527427	37.6545	1348.15	1.04684	1.51643	2.29545	0.57455	0.112138	0.406023	6.55e-07	4	1047	o
180	217	50	8.16838	2.13711	3.8302	11.5235	891.78	386.569	23.9423	0.864701	-0.499652	0.0873516	0.728792	0.783745	2.68503	0.721979	37.8856	1370.76	0.943056	1.17874	0.728792	0.390577	0.282	0.566468	0.0669608	1.64912	0.489768	2.61605	0.581631	37.7076	1359.34	0.90367	1.2501	1.64912	0.516931	0.104929	0.359554	7.93e-07	3	6732	o
181	547	78	12.7643	2.04166	9.02743	16.3317	276.872	398.099	32.9564	0.732877	1.33612	0.0682244	0.66472	0.865204	3.46565	0.742968	36.9401	1297.05	1.05347	1.2688	0.66472	0.381835	0.383017	0.672147	0.0484494	1.83711	0.620515	3.42053	0.601535	36.6948	1280.09	1.02625	1.4185	1.83711	0.541782	0.169257	0.480322	6.54e-07	2	864	o
182	45	21	3.32691	0.775004	1.77217	4.36955	1204.21	385.754	9.77258	0.792894	-0.141528	0.439298	0.253521	0.31749	1.18573	0.873239	42.493	1773.26	0.388625	0.464942	0.253521	0.245885	0.0829074	0.198535	0.515496	0.318182	-0.189189	1.13378	0.840909	42.3182	1768.13	0.271647	0.36743	0.318182	0.271647	0.0691083	0.161116	5.62e-07	4	1197	o
183	456	107	13.1281	6.02194	2.77784	24.9346	1169.68	398.524	47.4093	0.939701	-0.473103	0.0409562	1.38264	0.761817	3.90247	0.612477	37.6699	1347.52	1.10085	1.47274	1.38264	0.486228	0.233987	0.568436	0.0327353	3.35	0.425435	3.91525	0.455887	37.5111	1336.99	1.06008	1.59016	3.35	0.628098	0.0783073	0.348639	5.81e-07	3	1197	o
184	201	48	8.21726	2.50114	4.58168	12.2284	116.629	397.68	26.0194	0.912435	-0.919237	0.0319249	1.81983	0.809068	5.76566	0.560048	35.3645	1185.85	1.17961	1.57342	1.81983	0.532244	0.265526	0.618299	0.0314664	4.88816	0.479163	5.6926	0.388143	34.6118	1135.22	1.12541	1.6411	4.88816	0.696748	0.123685	0.441084	5.71e-07	3	330	o
185	362	72	11.0488	3.97007	4.92821	17.0011	1431.01	408.707	37.0486	0.928223	-0.369945	0.0290409	1.90689	0.838652	6.90923	0.557826	35.059	1166.01	1.23178	1.64463	1.90689	0.541738	0.278002	0.64187	0.0231038	5.44898	0.508486	6.54306	0.425722	34.5986	1133.04	1.18726	1.77495	5.44898	0.742754	0.109098	0.430352	3.15e-07	1	577	o
186	375	65	10.661	2.01395	7.36385	14.5394	1083.75	409.786	28.8197	0.766163	-0.356221	0.0378561	1.95379	0.844194	7.26994	0.585713	30.5588	883.176	1.23223	1.61937	1.95379	0.559981	0.309073	0.668412	0.0282212	5.3121	0.545335	6.84178	0.433403	30.2166	860.971	1.18355	1.70868	5.3121	0.732313	0.127099	0.454952	6.14e-07	2	641	o
187	559	128	19.9321	10.2579	1.7083	37.0961	431.206	435.464	78.6732	0.989267	0.791604	0.0452474	1.31916	0.779057	3.98529	0.648445	37.3292	1323.71	1.09267	1.4503	1.31916	0.488904	0.250709	0.583208	0.0313725	3.16592	0.495827	4.13972	0.511896	37.1031	1308.17	1.06466	1.58508	3.16592	0.643675	0.105502	0.402289	6.97e-07	4	931	o
188	250	70	9.79765	3.92922	3.27264	16.7237	1222.67	415.821	33.1101	0.943427	-0.420918	0.0579479	1.09153	0.725773	2.9902	0.657437	38.7963	1434.52	1.01202	1.3316	1.09153	0.45298	0.222902	0.532897	0.0430441	2.56061	0.330231	2.91156	0.509358	38.6818	1429.09	0.945797	1.43191	2.56061	0.586059	0.0540034	0.276401	5.25e-07	5	1022	o
189	377	87	13.2667	6.55879	1.95064	24.3823	1262.62	425.92	51.1285	0.978374	-0.649621	0.0729576	0.777117	0.815081	3.10124	0.70951	39.2571	1470.37	1.01124	1.26783	0.777117	0.399986	0.302914	0.603342	0.0492493	1.92833	0.568534	3.23462	0.570428	39.1433	1461.98	0.999339	1.44057	1.92833	0.549306	0.122984	0.414762	4.97e-07	3	970	o
190	51	21	3.76013	0.962887	2.08873	5.05973	31.0997	414.076	11.3445	0.858596	-0.800628	0.16858	0.539877	0.456378	1.49656	0.744785	40.8589	1614.77	0.692683	0.868919	0.539877	0.326074	0.123462	0.328698	0.136735	1.05714	0.0619341	1.56347	0.608571	40.9429	1625.69	0.637875	0.947835	1.05714	0.396215	0.0497977	0.217376	3.85e-07	2	205	o
191	297	68	11.3657	4.96634	3.3991	19.5198	474.412	421.256	41.2656	0.971488	0.664736	0.0837438	0.818868	0.77949	2.85676	0.698113	39.2736	1473.85	0.968979	1.23507	0.818868	0.402256	0.270641	0.566231	0.0551925	2.0339	0.475283	2.93809	0.529811	39.1017	1461.4	0.948303	1.38247	2.0339	0.539058	0.101088	0.36996	6.67e-07	5	558	o
192	239	56	9.02818	3.30399	3.58377	14.5745	559.611	419.006	30.7737	0.924824	0.507947	0.0209886	3.15475	0.810267	9.31367	0.481768	32.5686	1008.57	1.28811	1.79284	3.15475	0.635074	0.241272	0.623329	0.0167275	9.14054	0.431584	9.04036	0.322488	32.027	970.777	1.24139	1.86389	9.14054	0.822133	0.106629	0.435161	6.63e-07	2	505	o
193	91	29	4.98174	0.681265	3.47319	6.1162	738.139	418.248	12.6813	0.665607	1.24974	0.153162	0.524116	0.614187	1.67923	0.764952	39.8296	1531.02	0.729326	0.900426	0.524116	0.338344	0.21882	0.445503	0.114892	1.26087	0.164451	1.75452	0.613043	39.8406	1533.43	0.704015	0.999033	1.26087	0.464279	0.0288939	0.169895	7.27e-07	1	234	o
194	315	80	11.368	4.962	3.45276	20.1022	1194.47	431.156	40.718	0.962814	-0.456189	0.0548873	1.1297	0.72212	3.03271	0.638014	38.4553	1408.93	1.01292	1.33391	1.1297	0.451111	0.225208	0.535892	0.042504	2.82833	0.2675	2.9306	0.468644	38.1073	1386.08	0.943039	1.42788	2.82833	0.597335	0.0481343	0.260773	5.31e-07	5	1022	o
195	203	51	7.67501	1.66907	4.70654	10.4719	789.703	426.195	19.0105	0.593998	0.213641	0.204757	0.454924	0.456909	1.41883	0.789182	33.1123	1055.29	0.645932	0.798802	0.454924	0.320838	0.126724	0.320062	0.212402	0.675159	0.00323431	1.33867	0.73121	33.0446	1058.66	0.517954	0.747802	0.675159	0.378521	0.0232974	0.132185	7.41e-07	5	3851	o
196	173	56	9.04658	4.4458	1.71168	15.8001	449.03	432.354	35.7675	0.98262	0.687883	0.0623711	1.36519	0.572447	2.59651	0.624332	38.314	1400.97	0.951561	1.31526	1.36519	0.492687	0.138372	0.421421	0.0536704	2.71053	0.157303	2.60824	0.493653	38.2018	1395.76	0.89169	1.3748	2.71053	0.600153	0.039165	0.231168	6.9e-07	4	701	o
197	177	50	7.21893	1.56494	4.05191	10.5232	777.365	432.475	18.3942	0.639435	-0.621805	0.101437	0.709887	0.727819	2.30407	0.738412	30.8266	899.501	0.910115	1.14537	0.709887	0.393981	0.263876	0.542239	0.0707289	1.68217	0.384126	2.36568	0.593935	30.5659	885.467	0.872693	1.25999	1.68217	0.524124	0.077844	0.311481	7.36e-07	4	3851	o
198	164	40	6.81215	0.955695	4.99312	8.6534	833.35	428.053	17.0379	0.654769	0.14128	0.103262	0.775685	0.681158	2.21641	0.708733	37.3271	1332.06	0.885716	1.11898	0.775685	0.399069	0.228745	0.501	0.076672	1.792	0.259259	2.2096	0.573271	36.96	1308.29	0.831869	1.214	1.792	0.527041	0.0422104	0.225835	7.36e-07	5	3851	o
199	261	73	10.8892	5.20974	1.27014	19.966	587.118	440.088	40.9768	0.969249	0.82717	0.0507016	1.3011	0.789543	4.09113	0.628546	37.6747	1349.24	1.09366	1.44712	1.3011	0.47957	0.266452	0.599235	0.0301512	3.60099	0.497372	4.58216	0.44544	37.5714	1341.7	1.08889	1.63044	3.60099	0.635114	0.126979	0.44535	6.93e-07	3	785	o
200	420	76	11.3971	2.73903	6.91195	16.0078	968.079	434.584	31.9711	0.812469	-0.066927	0.0456145	1.09555	0.825941	4.14705	0.655972	34.8812	1151.47	1.11761	1.43402	1.09555	0.4544	0.30299	0.633044	0.0339351	2.85434	0.540265	4.10433	0.506659	34.7199	1141.21	1.07996	1.57099	2.85434	0.60905	0.114063	0.416012	6.22e-07	1	798	o
201	81	29	4.70984	1.06084	3.25401	6.58909	216.057	431.468	13.8399	0.823844	0.353288	0.0433742	1.64706	0.660334	3.42452	0.555882	38.0882	1381.32	1.03062	1.41777	1.64706	0.498324	0.184996	0.500998	0.0510744	3.70909	0.189423	3.28793	0.446845	37.7091	1357.41	0.939981	1.37344	3.70909	0.650788	0.0431628	0.242467	7.05e-07	5	2266	o
202	346	73	10.3466	2.37129	6.40712	15.9089	320.098	441.264	28.7655	0.789576	-0.425172	0.0335482	1.38296	0.889935	7.28246	0.619673	35.8432	1222.15	1.22519	1.57441	1.38296	0.483156	0.34016	0.689562	0.0210486	4.00346	0.70098	7.69431	0.432359	35.5467	1200.99	1.22162	1.75715	4.00346	0.666434	0.175466	0.535522	7.25e-07	3	4299	o
203	298	62	10.4916	3.61305	5.25183	16.6055	901.847	441.629	34.0557	0.932416	-0.632124	0.0327524	1.5269	0.841785	5.82539	0.583335	34.4527	1124.62	1.18334	1.56354	1.5269	0.496141	0.285808	0.637416	0.0231359	4.91903	0.520445	6.12874	0.392914	34.166	1104.9	1.16137	1.71639	4.91903	0.707025	0.101813	0.410081	6.68e-07	2	1333	o
204	171	43	6.98975	1.29024	4.90747	9.39146	59.8402	444.991	18.7293	0.757381	-0.284405	0.100773	0.606908	0.742486	2.1784	0.730099	39.9852	1533.2	0.881609	1.08274	0.606908	0.347947	0.279178	0.54428	0.0638757	1.54615	0.376335	2.23957	0.568462	39.7308	1514.62	0.856502	1.24285	1.54615	0.49007	0.0734079	0.300606	4.61e-07	3	372	o
205	152	39	6.58702	1.12518	4.32483	8.52216	821.251	445.422	17.5001	0.715231	-0.536721	0.0390957	1.81937	0.76351	4.84661	0.565243	34.6276	1135.28	1.13551	1.51779	1.81937	0.534949	0.24892	0.59201	0.0312872	4.65517	0.394888	4.84654	0.393391	34.3621	1118.27	1.08229	1.59956	4.65517	0.691633	0.0957075	0.385388	7.2e-07	6	3851	o
206	182	50	7.76003	2.84702	3.42584	12.8131	1234.59	445.929	26.267	0.930435	-0.390827	0.126	0.646226	0.646481	1.91399	0.739151	40.2406	1559.54	0.787655	0.993447	0.646226	0.373023	0.234205	0.481317	0.108197	1.34109	0.250466	1.89461	0.617829	39.9457	1539.03	0.743849	1.05931	1.34109	0.484773	0.0520208	0.234536	5.13e-07	4	970	o
207	139	43	6.84147	2.4504	2.90614	10.5667	109.034	446.008	22.9841	0.937948	-0.495449	0.129418	0.59205	0.581041	1.70657	0.746653	40.3745	1571.37	0.762196	0.958413	0.59205	0.356077	0.186455	0.42293	0.0922241	1.36275	0.225309	1.87954	0.577451	40.2647	1563.25	0.754018	1.09169	1.36275	0.453701	0.0431088	0.216702	5.76e-07	4	506	o
208	275	52	8.90622	0.790058	6.92524	10.2974	195.266	448.867	21.2939	0.491897	-0.235209	0.0254571	2.4246	0.868489	10.2182	0.519701	31.756	961.99	1.30038	1.72561	2.4246	0.585862	0.312685	0.687369	0.0191284	7.69912	0.574245	10.0417	0.367605	30.9646	910.248	1.26981	1.85366	7.69912	0.791654	0.153024	0.51426	7.09e-07	5	2266	o
209	539	88	13.0636	3.50826	6.53412	19.4706	225.847	450.789	37.7251	0.806442	-0.360737	0.0405958	1.83832	0.902886	10.4647	0.61727	31.4721	948.224	1.26935	1.63638	1.83832	0.550637	0.356101	0.712626	0.0296521	5.37581	0.703075	10.0525	0.474151	30.8877	909.218	1.25015	1.7659	5.37581	0.734818	0.194891	0.563062	7.33e-07	5	2266	o
210	96	33	5.10923	1.13969	2.37855	7.05325	1341.78	444.291	13.9661	0.711413	0.417998	0.123101	0.673846	0.629664	1.90978	0.736923	40.2677	1562.17	0.780872	0.996942	0.673846	0.381306	0.213472	0.460427	0.102051	1.70312	0.180018	2.03851	0.617188	40.0469	1546.75	0.749321	1.07378	1.70312	0.533595	0.0638788	0.261539	4.5e-07	1	223	o
211	60	23	3.91132	0.356215	3.23175	4.54551	1066.35	446.152	9.50049	0.520024	-1.16779	0.222197	0.429293	0.447717	1.38865	0.791414	39.8232	1537.67	0.62444	0.7609	0.429293	0.306441	0.129015	0.315624	0.169625	0.846154	0.0134151	1.42883	0.669231	39.7179	1532.66	0.579818	0.84607	0.846154	0.390056	0.00469286	0.0630231	5.35e-07	2	595	o
212	422	71	11.3058	2.58464	5.75478	15.8902	795.828	455.485	31.8028	0.809557	-0.44667	0.0251816	1.72442	0.90107	9.71537	0.58045	32.7845	1025.34	1.28529	1.68721	1.72442	0.527197	0.334706	0.701769	0.0194804	5.21652	0.695875	9.57629	0.407109	32.2194	988.272	1.24869	1.80577	5.21652	0.723665	0.181359	0.549936	7.22e-07	7	3851	o
213	40	18	3.20688	0.630871	1.8667	4.08739	467.1	448.414	9.02211	0.770961	0.976926	0.053376	1.848	0.432047	2.6269	0.545271	38.696	1431.37	0.924139	1.34627	1.848	0.518696	0.103108	0.368986	0.0652174	4.34783	-0.0258698	3.11909	0.385166	39.0435	1461.28	0.87079	1.24047	4.34783	0.648034	0.119675	0.382186	7.19e-07	5	701	o
214	184	43	7.23801	0.925347	5.32756	8.94488	834.931	454.877	17.5476	0.598052	-0.72902	0.0547911	1.22424	0.722297	3.20423	0.636542	36.8061	1287.26	1.03363	1.38329	1.22424	0.470615	0.215072	0.532432	0.0533357	2.54676	0.3435	2.93965	0.510199	36.5468	1272.46	0.948334	1.41232	2.54676	0.591386	0.0917421	0.356344	7.03e-07	4	3851	o
215	282	58	9.36005	2.39173	5.35275	13.4497	327.717	458.84	27.9721	0.870992	-0.43844	0.0428575	1.31548	0.841963	5.16195	0.639664	35.4206	1189.43	1.15557	1.49356	1.31548	0.486969	0.310409	0.649886	0.0316737	3.55895	0.552793	4.97909	0.477644	34.9738	1159.32	1.10696	1.61545	3.55895	0.654383	0.148273	0.477443	7.54e-07	3	4299	o
216	215	69	8.91244	3.45055	1.47776	14.3369	602.217	469.107	28.7328	0.908473	1.47081	0.0781301	1.06089	0.702449	2.78271	0.670907	38.3572	1404.57	0.960767	1.264	1.06089	0.453523	0.223036	0.521431	0.0511254	2.34591	0.374943	2.87656	0.543103	38.0566	1382.32	0.946524	1.38994	2.34591	0.576727	0.0811477	0.333036	7.29e-07	2	785	o
217	146	38	6.40479	0.887827	4.54289	8.00039	378.774	464.584	15.9284	0.641329	-1.14716	0.13534	0.48062	0.708443	1.82423	0.782946	40.3488	1567.99	0.786533	0.945213	0.48062	0.329949	0.284019	0.518335	0.0946315	1.1405	0.3984	1.94789	0.628099	40.3306	1566.07	0.790447	1.0848	1.1405	0.446428	0.0898926	0.311553	7.57e-07	1	432	o
218	283	57	9.21187	2.01402	5.7824	12.6337	192.507	473.593	26.0018	0.813038	-1.31785	0.0299674	1.64341	0.838441	6.0861	0.583288	35.3895	1187.51	1.20168	1.59881	1.64341	0.517868	0.280041	0.637066	0.0209987	4.4721	0.560019	6.08215	0.419358	34.7039	1139.92	1.17677	1.75459	4.4721	0.685704	0.120347	0.448585	7.25e-07	4	2266	o
219	332	72	10.2854	3.17964	4.7129	15.8532	701.264	468.877	32.3405	0.887661	0.0472044	0.0343216	1.6409	0.832488	5.89785	0.598589	35.4564	1191.26	1.20268	1.5983	1.6409	0.522051	0.278266	0.635197	0.0293736	4.23048	0.561416	5.82289	0.453089	35.1152	1167.59	1.16626	1.68959	4.23048	0.691852	0.132604	0.461884	7.29e-07	2	1616	o
220	386	70	10.7929	2.54135	4.27589	14.9704	308.545	478.214	30.1005	0.767151	1.28495	0.0281623	1.78395	0.870852	7.90661	0.59334	33.5883	1069.7	1.27951	1.68383	1.78395	0.533756	0.318507	0.68673	0.020101	5.36364	0.627987	8.20894	0.443788	33.1758	1042.9	1.24728	1.81951	5.36364	0.728614	0.163724	0.526386	7.82e-07	3	4299	o
221	41	20	3.15863	0.789338	2	4.12311	494.021	467.004	9.65677	0.825165	-0.00881115	0.124969	0.992188	0.319249	1.72874	0.672656	39.8047	1530.12	0.712572	0.969116	0.992188	0.435063	0.0573604	0.235846	0.13258	2.58621	-0.317782	1.98127	0.451724	40.3793	1579.07	0.65869	0.960155	2.58621	0.537939	0.0841058	0.284331	7.46e-07	4	701	o
222	445	83	13.8506	5.82961	4.31941	23.1531	535.696	480.878	49.5007	0.96612	0.70356	0.0313936	1.78918	0.835894	6.45131	0.601145	34.8181	1150.03	1.2024	1.61369	1.78918	0.540641	0.272025	0.631145	0.022281	4.91008	0.552114	6.4814	0.441666	34.4087	1121.61	1.17322	1.74663	4.91008	0.715256	0.102112	0.413935	7.57e-07	2	1253	o
223	222	62	8.21355	1.68225	4.83914	11.4511	243.056	485.127	21.253	0.701548	-0.930883	0.050432	1.03646	0.81993	3.87793	0.653278	37.8125	1359.08	1.08919	1.40265	1.03646	0.433353	0.288715	0.614044	0.0372555	2.61905	0.519551	3.72562	0.513165	37.381	1329.36	1.03428	1.50037	2.61905	0.595861	0.107682	0.3962	7.73e-07	3	3899	o
224	405	92	13.7304	6.74813	2.27556	24.4888	775.039	499.164	55.2076	0.982088	1.0534	0.0700267	0.912595	0.73057	2.69357	0.690709	37.9738	1373.62	0.990611	1.27762	0.912595	0.428532	0.238346	0.540635	0.0512806	2.14642	0.356091	2.66671	0.538116	37.9221	1372.42	0.937001	1.39774	2.14642	0.561358	0.0538206	0.272754	7.25e-07	2	727	o
225	312	79	11.6236	5.53645	2.04363	20.8642	30.0044	489.82	44.5272	0.97691	-0.501248	0.127506	0.523982	0.741922	2.01516	0.776018	40.3647	1565.23	0.846387	1.02711	0.523982	0.345601	0.289733	0.542127	0.0776087	1.23043	0.480384	2.18398	0.650256	40.1435	1546.04	0.86836	1.21162	1.23043	0.478441	0.097541	0.341809	3.9e-07	1	845	o
226	284	65	10.0059	3.79951	4.10066	16.3547	1372.2	491.479	34.02	0.938489	1.00385	0.0359362	1.49608	0.790034	4.56266	0.590231	36.8588	1288.36	1.14319	1.52638	1.49608	0.493723	0.25666	0.601675	0.0259625	3.66376	0.492708	4.61109	0.414118	36.7991	1284.65	1.10781	1.63867	3.66376	0.632056	0.106631	0.410538	5.03e-07	2	449	o
227	100	33	5.23404	1.04829	3.5235	7.21047	130.882	483.588	14.586	0.756028	0.269752	0.0312361	2.2807	0.673834	4.49623	0.51063	36.7895	1284.21	1.11731	1.5651	2.2807	0.56446	0.175717	0.510192	0.0407149	4.21311	0.10959	3.36583	0.396002	35.7213	1215.46	0.933197	1.45904	4.21311	0.659993	0.102135	0.381219	6.3e-07	2	217	o
228	267	58	8.94931	2.14616	5.03029	12.7925	705.451	488.255	25.754	0.82955	-0.10679	0.0623711	0.978283	0.799792	3.44317	0.667072	37.576	1343.37	1.04416	1.32427	0.978283	0.431407	0.293955	0.605316	0.046082	2.53211	0.458901	3.33979	0.507501	37.211	1318.39	0.995483	1.45625	2.53211	0.591181	0.0954731	0.36857	7.39e-07	2	1616	o
229	636	90	14.0282	2.35811	10.0843	20.0179	256.712	498.728	35.7267	0.676693	1.54938	0.0279848	1.56502	0.905842	9.31055	0.609132	31.1204	920.9	1.30055	1.6695	1.56502	0.517178	0.363358	0.723539	0.0179002	5.10357	0.685345	9.10979	0.422095	30.6893	892.129	1.28192	1.84838	5.10357	0.722989	0.160593	0.525211	7.86e-07	2	3899	o
230	600	103	16.5716	7.48762	4.39844	28.705	1212.76	500.038	61.7167	0.974072	-0.631373	0.0295216	1.68597	0.839581	6.25489	0.571406	34.7701	1144.61	1.22497	1.61788	1.68597	0.515113	0.295606	0.655346	0.0208019	4.9505	0.519481	6.1512	0.401353	34.4594	1122.91	1.184	1.76812	4.9505	0.711773	0.11129	0.433696	5.37e-07	1	1140	o
231	106	36	5.54531	1.79018	1.50565	8.20503	892.843	489.457	17.7968	0.876276	-0.746581	0.0372747	1.73259	0.700933	3.89666	0.557824	36.0334	1231.97	1.07468	1.47504	1.73259	0.51713	0.197777	0.525894	0.0299556	4.70667	0.272075	4.23293	0.397183	35.96	1228.07	1.03377	1.57685	4.70667	0.692225	0.0536822	0.288631	6.17e-07	2	447	o
232	215	48	7.82466	1.04661	5.96449	9.77199	1325.87	492.654	19.5949	0.678028	0.175836	0.0952635	0.811054	0.76615	2.73414	0.714781	39.5334	1496.16	0.932506	1.18437	0.811054	0.412277	0.268527	0.554472	0.091649	1.67665	0.491905	2.64993	0.607186	39.3533	1485.57	0.874169	1.20282	1.67665	0.526578	0.108709	0.35936	5.38e-07	2	507	o
233	132	42	6.56482	2.62415	2.5575	10.7689	400.236	500.698	23.3323	0.944466	1.12888	0.0697981	1.09978	0.587776	2.33396	0.620399	39.5255	1495.85	0.90409	1.20585	1.09978	0.424815	0.167905	0.445312	0.0525439	3.17822	0.00324351	2.59428	0.438963	39.297	1481.37	0.850088	1.33003	3.17822	0.607816	0.0136537	0.134605	7.98e-07	2	272	o
234	457	81	13.5078	5.03402	4.97655	21.3741	569.97	508.241	45.3634	0.95087	0.652445	0.0488411	1.07262	0.816644	3.92496	0.671674	37.0702	1303.86	1.10865	1.41863	1.07262	0.453659	0.298272	0.625964	0.0388672	2.51323	0.53112	3.68003	0.542338	36.7831	1284.41	1.05909	1.53629	2.51323	0.599254	0.110327	0.405241	7.77e-07	2	1253	o
235	252	61	9.08978	3.20893	3.10685	14.2718	669.094	500.734	30.3167	0.916626	-0.0755617	0.026811	2.02993	0.804687	6.19662	0.524932	35.6109	1203.16	1.19565	1.62882	2.02993	0.535961	0.251829	0.611998	0.0183707	6.11055	0.417476	6.24489	0.336397	35.2462	1176.37	1.16537	1.78429	6.11055	0.731496	0.0801473	0.372035	7.51e-07	3	607	o
236	294	77	10.8879	4.79783	2.77403	19.0803	1127.91	502.038	40.3305	0.969209	-0.256252	0.0810016	0.712368	0.733905	2.33856	0.701342	39.5561	1496.13	0.936257	1.17182	0.712368	0.368341	0.258753	0.542303	0.0626173	1.76444	0.304921	2.26924	0.560444	39.4356	1490.7	0.868866	1.29336	1.76444	0.522772	0.0517013	0.257566	4.95e-07	2	559	o
237	579	95	13.6777	3.97743	3.48613	20.3132	314.808	512.298	38.7734	0.748433	-1.53996	0.0317753	1.92315	0.876623	8.79381	0.589389	31.6679	953.805	1.26144	1.65586	1.92315	0.554843	0.323571	0.687231	0.0237453	5.51546	0.61808	8.22071	0.434981	30.9588	907.498	1.22442	1.76745	5.51546	0.738563	0.139553	0.48261	8.05e-07	3	4299	o
238	470	78	12.2083	3.13842	6.52745	18.0609	219.765	512.86	36.2068	0.852392	-1.3644	0.0410621	1.66016	0.864344	7.11903	0.632343	32.5086	1001.73	1.22099	1.57777	1.66016	0.530934	0.331964	0.682892	0.0313636	3.9519	0.661599	6.83908	0.497373	31.8962	961.975	1.19488	1.69707	3.9519	0.68675	0.168019	0.517204	7.63e-07	3	3899	o
239	184	52	7.61407	2.54399	2.74145	11.9926	1271.46	503.919	24.1306	0.851448	-0.0167744	0.0287243	2.15373	0.756923	5.43012	0.525986	35.4984	1194.05	1.16942	1.60061	2.15373	0.557638	0.226845	0.579695	0.0294416	6.42361	0.354161	5.97308	0.357373	35.3681	1185.13	1.13849	1.64859	6.42361	0.757923	0.0937411	0.386883	5.63e-07	1	737	o
240	307	65	9.77907	3.04315	2.57232	15.0992	290.638	510.102	29.7939	0.863616	-0.886658	0.0353165	1.51393	0.807823	4.93888	0.588621	34.876	1151.01	1.16	1.5313	1.51393	0.49868	0.276224	0.622767	0.024463	4.44444	0.487909	5.33951	0.41546	34.5556	1129.37	1.14207	1.69319	4.44444	0.69065	0.103309	0.410411	8.01e-07	3	4299	o
241	239	53	8.35947	1.94085	5.15547	11.8431	711.013	506.15	24.213	0.825617	0.145025	0.0288028	1.69711	0.832967	6.08016	0.553757	36.1618	1241.53	1.1918	1.58969	1.69711	0.505122	0.282125	0.637773	0.0210601	5.14573	0.508521	6.23494	0.397003	35.9296	1224.43	1.16421	1.72401	5.14573	0.707946	0.131573	0.464302	7.48e-07	4	1616	o
242	194	46	7.54064	1.42181	4.86199	10.1053	1468.09	509.388	20.4889	0.769509	-0.46507	0.0430091	1.29913	0.826648	4.7471	0.622484	36.9928	1300.88	1.11534	1.45138	1.29913	0.477407	0.289387	0.622917	0.0328049	3.58442	0.536256	4.86465	0.441888	36.7532	1283.87	1.08825	1.55866	3.58442	0.645385	0.132172	0.44492	3.87e-07	4	992	o
243	312	58	9.56814	1.55117	6.29256	12.2084	96.2927	514.82	25.2342	0.739875	1.24977	0.0392699	1.33972	0.83565	5.07581	0.62479	34.6411	1135.45	1.1675	1.51525	1.33972	0.48737	0.302864	0.646315	0.0312343	3.62302	0.503341	4.64739	0.471319	33.8532	1083.55	1.10279	1.61	3.62302	0.650041	0.105644	0.405429	5.56e-07	2	670	o
244	148	40	6.53245	1.43427	3.57351	9.21792	459.752	512.27	17.8223	0.766598	0.478337	0.129007	0.574757	0.617755	1.75182	0.756893	34.4971	1139.15	0.781825	0.973905	0.574757	0.355003	0.203014	0.444436	0.10276	1.02804	0.305277	1.73989	0.654206	34.2617	1125.39	0.743578	1.03816	1.02804	0.433437	0.0486263	0.224553	8.01e-07	4	1910	o
245	294	83	11.4499	5.33462	1.89387	20.0104	905.919	515.502	44.0045	0.973018	-0.302458	0.0776855	0.964286	0.704587	2.6321	0.664961	39.3523	1479.79	0.956615	1.25586	0.964286	0.426525	0.214184	0.510005	0.0763537	2.10046	0.386689	2.71239	0.565727	39.1781	1469.9	0.900846	1.31816	2.10046	0.566529	0.0897232	0.34127	5.99e-07	1	612	o
246	76	29	4.62879	1.41125	2.13264	6.84785	1422.79	511.031	14.6585	0.8861	-0.431694	0.215171	0.52988	0.370257	1.42071	0.768526	40.8645	1620.32	0.625653	0.79527	0.52988	0.343819	0.0988283	0.2817	0.216576	0.836735	-0.0660653	1.39244	0.704082	40.9592	1635.95	0.521393	0.748298	0.836735	0.413029	0.00912538	0.0826821	4.77e-07	4	240	o
247	138	41	6.38264	1.9663	3.39734	9.58177	666.633	513.228	20.6395	0.886874	-0.217099	0.0171072	4.11042	0.732	8.6687	0.403468	34.4521	1127.38	1.27357	1.80947	4.11042	0.655344	0.208091	0.585767	0.0195081	12.7019	0.219229	9.13422	0.269789	34.1442	1106.14	1.18502	1.80345	12.7019	0.876279	0.12282	0.45849	7.6e-07	5	607	o
248	233	50	8.51231	1.98962	4.49021	11.8086	136.452	518.062	24.4388	0.840694	0.68207	0.032556	1.64727	0.810274	5.34118	0.584218	35.31	1180.85	1.17594	1.57062	1.64727	0.516473	0.27075	0.62329	0.023243	4.93085	0.461692	5.57995	0.411817	34.8564	1150.6	1.13386	1.71116	4.93085	0.715993	0.11908	0.441363	6.42e-07	3	604	o
249	488	97	15.1544	7.11085	4.34539	26.835	1439.07	527.665	58.2617	0.979106	-0.583992	0.0527954	1.27016	0.770415	3.76622	0.655473	36.3204	1251.83	1.07779	1.40788	1.27016	0.484582	0.264217	0.590411	0.0392541	2.72362	0.493678	3.68961	0.516437	36.2563	1247.53	1.0498	1.52133	2.72362	0.608928	0.0998424	0.384381	4.79e-07	6	992	o
250	69	27	4.31503	0.833451	2.81213	5.8167	470.296	520.205	11.633	0.719625	0.14901	0.071763	0.977778	0.657558	2.42765	0.649778	33.7778	1085.1	0.908834	1.19763	0.977778	0.415534	0.201763	0.485454	0.0674074	2.08889	0.232026	2.36	0.488889	33.7333	1086.46	0.822671	1.22268	2.08889	0.510298	0.101792	0.350571	8.04e-07	5	1910	o
251	619	95	14.7095	5.11772	6.72054	23.5148	1094.45	529.989	47.3907	0.927417	-0.459477	0.0842919	0.822511	0.817888	3.25826	0.721212	37.2459	1321.59	1.00526	1.24941	0.822511	0.417435	0.325678	0.620444	0.0666039	2.0298	0.542197	3.21689	0.595027	37.0764	1310.25	0.973481	1.36987	2.0298	0.567043	0.124598	0.407943	5.05e-07	2	827	o
252	597	88	13.2646	2.68832	7.53135	18.0735	242.456	532.249	34.8316	0.703061	0.203793	0.0364406	1.89834	0.83605	6.7894	0.594877	32.0372	970.888	1.22113	1.62068	1.89834	0.554118	0.282397	0.642739	0.0257008	5.27713	0.524297	6.54666	0.4347	31.6221	943.585	1.18074	1.7628	5.27713	0.73192	0.0998758	0.411288	7.77e-07	5	3899	o
253	613	135	20.0128	10.3869	3.32305	37.9282	567.357	536.83	80.8328	0.990522	0.514683	0.0285235	2.02715	0.785259	5.71998	0.543338	35.7348	1209.82	1.1955	1.61555	2.02715	0.548696	0.250872	0.608996	0.0204869	5.80652	0.400424	5.84218	0.381464	35.3747	1184.11	1.16149	1.75973	5.80652	0.743717	0.0774796	0.363645	7.94e-07	3	876	o
254	46	19	3.43685	0.609027	2.2656	4.35604	485.11	526.968	9.12443	0.680318	0.803311	0.19151	0.503448	0.406487	1.42413	0.764828	35.9931	1250.85	0.642636	0.807239	0.503448	0.326714	0.0947141	0.277708	0.122789	1.09677	0.05386	1.5796	0.606452	35.9355	1247.09	0.638636	0.929955	1.09677	0.40777	0.0203553	0.137631	8.05e-07	5	1910	o
255	48	19	3.50391	0.257155	2.9062	3.93014	399.325	527.595	8.19027	0.374772	0.605086	0.177232	0.496774	0.492872	1.48979	0.774839	41.4774	1667.86	0.655834	0.817533	0.496774	0.33221	0.135429	0.334632	0.19025	0.827586	0.144963	1.48395	0.668966	41.1724	1648.73	0.581516	0.809883	0.827586	0.382284	0.051738	0.205189	8.09e-07	3	209	o
256	264	71	9.17849	2.84877	4.51199	14.4249	1463.1	536.078	27.469	0.821927	-0.970337	0.0791109	0.867457	0.688815	2.3938	0.683944	38.3351	1404.01	0.927907	1.19757	0.867457	0.411404	0.220423	0.506665	0.0719187	1.81818	0.289927	2.28028	0.551515	38.101	1390.56	0.855069	1.22716	1.81818	0.524392	0.0439963	0.231751	4.41e-07	5	651	o
257	507	87	12.5081	2.94788	7.30113	18.6587	285.296	538.97	33.946	0.751671	-1.10392	0.0452557	1.08733	0.859006	4.85593	0.665921	35.7061	1209.62	1.13319	1.44412	1.08733	0.457818	0.3318	0.661054	0.0350625	2.97183	0.590276	4.62662	0.517959	35.3568	1185.34	1.096	1.56976	2.97183	0.628628	0.139666	0.45824	7.95e-07	5	4299	o
258	179	60	8.44467	3.51518	2.62001	14.4752	514.243	534.496	28.5496	0.948373	0.492734	0.0549574	1.14662	0.706525	2.95352	0.624382	39.1137	1460.04	0.990609	1.32325	1.14662	0.441495	0.212165	0.51916	0.0449727	2.69355	0.274218	2.85562	0.48093	38.6452	1427.71	0.922742	1.39473	2.69355	0.589347	0.0641386	0.297116	8.02e-07	3	1910	o
259	521	86	13.9112	5.04726	5.02004	21.5253	1361.37	541.622	46.6097	0.935614	0.861752	0.0408048	1.13025	0.868	5.28125	0.672499	35.7862	1213.54	1.18062	1.50785	1.13025	0.463486	0.34156	0.680178	0.0279576	2.86073	0.657048	5.17075	0.522323	35.6461	1203.26	1.15784	1.65596	2.86073	0.61731	0.173432	0.519443	6.21e-07	2	822	o
260	388	67	10.8575	2.17448	6.51625	14.1827	34.2121	542.389	29.8498	0.785585	1.01268	0.0411184	1.09129	0.877724	5.46239	0.648362	34.9756	1159.01	1.1784	1.49047	1.09129	0.448697	0.353335	0.687398	0.0271151	3.31746	0.614856	5.30678	0.463356	34.2952	1112.95	1.14351	1.67164	3.31746	0.634255	0.15097	0.48876	4.06e-07	1	656	o
261	288	88	11.7339	5.92908	2.65909	21.5106	445.068	536.546	49.4533	0.985713	0.155276	0.0325255	2.0159	0.743278	4.92624	0.560823	37.8429	1361.7	1.12769	1.56411	2.0159	0.558709	0.201479	0.54371	0.0287617	5.27962	0.344256	5.02567	0.426343	37.6209	1344.4	1.10271	1.6592	5.27962	0.725876	0.0788697	0.356876	8.08e-07	6	1910	o
262	207	54	8.04171	2.70837	3.61775	12.5054	710.109	534.442	25.96	0.913048	0.079666	0.14683	0.559783	0.570794	1.65211	0.759239	40.6957	1597.03	0.758451	0.948296	0.559783	0.350963	0.168114	0.399683	0.123372	0.968153	0.257267	1.65175	0.66879	40.6115	1593.34	0.715324	1.00626	0.968153	0.427824	0.0472739	0.218068	7.68e-07	3	359	o
263	410	82	12.0074	4.03681	5.36377	18.9219	215.33	549.484	39.0989	0.912459	0.518531	0.0314882	1.7607	0.850542	6.89026	0.590366	34.1056	1102.92	1.2253	1.62071	1.7607	0.537464	0.301241	0.661199	0.0201447	5.11953	0.586436	7.18953	0.420998	33.7843	1081.06	1.20475	1.79482	5.11953	0.720761	0.133944	0.476596	7.46e-07	3	3899	o
264	139	42	6.25976	1.82332	1.60816	8.76223	1312.26	547.105	18.5975	0.793966	-0.594398	0.0347358	1.87526	0.703606	4.16345	0.558542	36.7027	1278.35	1.09976	1.52193	1.87526	0.538147	0.199733	0.535345	0.0291733	4.73786	0.212064	4.0065	0.413371	36.6019	1273.52	1.01781	1.5776	4.73786	0.70261	0.0637805	0.314191	6.54e-07	3	236	o
265	306	76	10.9505	4.6476	4.01316	18.6851	636.582	551.204	40.0346	0.965647	0.280412	0.0441364	1.23035	0.788601	3.91002	0.632595	38.0402	1376.26	1.08287	1.41981	1.23035	0.471101	0.261321	0.589407	0.03144	3.5679	0.379968	3.87719	0.468449	37.7654	1357.15	1.03391	1.55878	3.5679	0.646244	0.0739179	0.335803	7.88e-07	4	489	o
266	318	71	11.4669	4.73548	3.80347	19.0152	133.027	558.529	40.4962	0.963017	0.671353	0.08092	0.861646	0.703652	2.45378	0.697373	38.5482	1418.75	0.947641	1.22707	0.861646	0.416118	0.219505	0.510951	0.0642885	1.8871	0.335402	2.41973	0.566509	38.379	1409.82	0.881924	1.31652	1.8871	0.538415	0.0689447	0.29954	6.25e-07	4	1248	o
267	249	55	8.84066	2.16037	5.42663	12.8166	783.765	564.631	25.637	0.844637	-0.668036	0.033444	2.07898	0.784911	5.83283	0.557289	34.9867	1159.64	1.18749	1.59469	2.07898	0.563436	0.257068	0.612578	0.024	5.76	0.406721	5.85438	0.399496	34.55	1129.13	1.15131	1.74158	5.76	0.741463	0.0751242	0.356519	7.77e-07	2	386	o
268	277	58	8.97352	1.48138	5.76752	11.5709	1416.52	566.909	23.0272	0.675528	-1.27837	0.0466476	1.0337	0.848888	4.42029	0.67183	36.1596	1239.92	1.12705	1.4263	1.0337	0.44115	0.334079	0.660025	0.032438	2.56364	0.6032	4.23039	0.499144	35.7545	1212.28	1.08579	1.54461	2.56364	0.584461	0.137211	0.451127	5.88e-07	4	796	o
269	268	56	8.91081	1.57918	5.84442	12.4863	1433.79	564.928	22.8863	0.709098	-0.41412	0.0920604	0.836066	0.759473	2.73799	0.711066	36.834	1291.8	0.977639	1.21759	0.836066	0.416577	0.286588	0.578414	0.0555453	2	0.429785	2.75373	0.545317	36.8326	1292.82	0.946685	1.34784	2	0.545687	0.0772528	0.320388	5.49e-07	5	796	o
270	239	55	8.67906	2.38969	4.65145	12.8636	273.544	568.514	25.9661	0.864056	-0.651692	0.0463457	1.18881	0.80736	4.08557	0.636364	36.7832	1284.34	1.10146	1.43006	1.18881	0.461997	0.283848	0.613926	0.0318606	3.44103	0.478082	4.29652	0.440999	36.5487	1268.03	1.07636	1.57592	3.44103	0.62638	0.104517	0.39941	7.71e-07	4	4299	o
271	496	102	13.9237	6.35005	1.84525	24.5244	1054	580.128	51.647	0.961112	-0.829318	0.037644	1.29363	0.833675	4.88887	0.634248	37.0432	1301.93	1.15917	1.51353	1.29363	0.483364	0.296884	0.64033	0.025217	3.50843	0.57258	5.1042	0.468536	36.9301	1293.58	1.14369	1.6828	3.50843	0.650735	0.116193	0.432966	5.95e-07	4	842	o
272	164	58	7.96552	3.40752	2.71167	14.1449	601.619	568.173	28.328	0.961662	0.204479	0.0633696	1.20609	0.636843	2.66057	0.62276	39.2921	1476.32	0.940037	1.25279	1.20609	0.451974	0.188907	0.479569	0.054403	3.21774	0.0853276	2.75896	0.461907	39.1694	1469.89	0.880027	1.31821	3.21774	0.625486	0.0238529	0.176979	7.95e-07	5	692	o
273	294	80	11.6151	5.53545	3.32002	20.8764	376.834	577.035	44.5413	0.980203	0.403126	0.0714168	0.994203	0.679334	2.55021	0.661739	39.1894	1466.56	0.961729	1.26786	0.994203	0.431633	0.197685	0.492748	0.0537663	2.48416	0.211404	2.57505	0.497166	39.0543	1459.95	0.89496	1.37335	2.48416	0.573856	0.0413416	0.237332	7.83e-07	2	583	o
274	642	130	14.5441	5.68518	2.51634	26.3256	470.577	578.254	48.2253	0.911055	0.180626	0.0256748	2.36406	0.77224	6.18981	0.55412	35.8934	1220.77	1.21807	1.6869	2.36406	0.592573	0.222308	0.586691	0.0186919	6.51107	0.401727	6.44155	0.42082	35.8469	1217.02	1.18044	1.82816	6.51107	0.763539	0.0799341	0.375762	7.89e-07	4	849	o
275	208	73	9.50595	4.28942	2.72823	17.2048	628.113	572.822	35.173	0.973632	0.131845	0.117006	0.69024	0.559022	1.78262	0.734653	40.7949	1602.93	0.788837	1.0179	0.69024	0.385496	0.155816	0.397524	0.0920904	1.52055	0.103502	1.84805	0.593151	40.863	1611.45	0.743473	1.1069	1.52055	0.4974	0.024176	0.163476	7.96e-07	4	692	o
276	271	63	9.25754	2.89806	4.31985	14.4165	931.382	577.808	28.8098	0.885992	-0.57396	0.0738352	0.724742	0.799668	2.80885	0.716804	39.7784	1511.88	0.979205	1.21485	0.724742	0.387107	0.303446	0.593685	0.0511637	1.66509	0.566559	2.92078	0.589983	39.684	1504.47	0.974172	1.36028	1.66509	0.517135	0.133866	0.421064	6.57e-07	1	456	o
277	117	34	5.87897	1.41114	3.56113	7.98376	1028.79	578.334	17.6197	0.848692	-0.891091	0.0172779	3.78025	0.758126	8.81451	0.401018	34.8469	1154.12	1.28143	1.81965	3.78025	0.637035	0.204864	0.582986	0.0171905	10.3804	0.336803	8.82606	0.249478	35.0109	1162.83	1.21875	1.82239	10.3804	0.823639	0.10847	0.434296	5.92e-07	2	209	o
278	177	49	7.30125	2.31368	2.34561	11.0764	856.56	577.636	21.7901	0.819192	0.110576	0.0774696	1.29126	0.77922	3.92431	0.649058	39.0421	1456.77	1.01103	1.3318	1.29126	0.489439	0.239859	0.551722	0.115145	2.8626	0.537466	4.09447	0.590304	39.1069	1466.02	0.942711	1.25535	2.8626	0.618925	0.139952	0.414894	7.42e-07	6	955	o
279	309	86	13.2487	6.74619	2.64263	24.4874	1295.45	586.276	52.9286	0.988624	-0.591267	0.0512162	1.48701	0.630059	3.0098	0.608714	37.808	1361.1	1.00377	1.38839	1.48701	0.502025	0.156886	0.458806	0.045749	2.83482	0.206319	2.78587	0.467463	37.7902	1363.65	0.920964	1.42511	2.83482	0.596392	0.0322473	0.213624	7.33e-07	4	618	o
280	168	46	7.17863	2.0885	3.90052	10.8966	132.398	579.429	22.6482	0.887283	0.302804	0.0204769	3.01695	0.769839	7.554	0.48347	32.5831	1004.46	1.25792	1.74622	3.01695	0.6192	0.23292	0.607398	0.020202	8.4697	0.367837	7.69898	0.308255	32.2879	984.627	1.2025	1.76378	8.4697	0.805537	0.116899	0.44347	6.16e-07	3	1248	o
281	179	57	7.50544	2.36436	2.28825	11.3721	835.492	585.595	23.0578	0.822466	-0.754213	0.033805	2.2013	0.783784	6.09052	0.541573	36.2013	1246.09	1.15946	1.57561	2.2013	0.572796	0.235701	0.586176	0.026944	6.096	0.400672	6.0857	0.374963	35.904	1225.07	1.10706	1.6416	6.096	0.753021	0.138998	0.466336	7.78e-07	8	955	o
282	101	37	5.37206	1.1524	3.23027	7.8	848.499	584.728	13.8962	0.627783	-0.589032	0.0369721	1.875	0.717446	4.31795	0.567962	38.4107	1403.85	1.09514	1.51932	1.875	0.539477	0.189866	0.522421	0.036757	4.75362	0.233904	4.1025	0.375539	38.2319	1393.61	1.00348	1.51588	4.75362	0.678918	0.0644614	0.309903	7.64e-07	7	955	o
283	142	39	6.54256	1.47774	4.12757	9.11386	149.796	585.218	18.73	0.832904	0.446149	0.0380321	1.79032	0.731914	4.33908	0.561812	35.621	1202.98	1.10415	1.48868	1.79032	0.528893	0.227756	0.563856	0.0369513	5.12963	0.314529	4.74168	0.408891	35.4259	1190.47	1.06553	1.51605	5.12963	0.71544	0.0890885	0.363074	6.42e-07	3	1248	o
284	222	65	9.43011	4.29943	3.06899	16.3905	872.164	588.193	36.4049	0.972298	-0.367205	0.0230213	3.62532	0.68875	6.82382	0.415694	34.9018	1155.84	1.19473	1.71041	3.62532	0.62923	0.178008	0.53301	0.0176234	9.98802	0.168033	7.00265	0.266049	34.7186	1140.64	1.15342	1.81056	9.98802	0.815337	0.0495084	0.296337	7.47e-07	5	317	o
285	690	116	16.9701	7.22172	5.60784	29.4352	1081.94	596.982	60.3279	0.962914	-0.391713	0.046609	1.06211	0.836995	4.2579	0.669929	36.7074	1277.85	1.12828	1.44454	1.06211	0.450672	0.315462	0.646416	0.0311979	2.84184	0.56541	4.26956	0.515961	36.5017	1263.94	1.09402	1.61253	2.84184	0.619778	0.125031	0.439896	6.45e-07	6	953	o
286	240	68	9.85001	4.53538	2.10294	17.5058	1359.14	598.307	38.1954	0.971665	-1.20842	0.0314875	2.044	0.739761	4.92715	0.541701	36.5196	1265.74	1.135	1.5838	2.044	0.552671	0.196471	0.54021	0.0288723	4.88587	0.338144	4.69104	0.407782	36.6141	1272.73	1.07756	1.61716	4.88587	0.705111	0.0699101	0.332489	7.2e-07	4	491	o
287	177	51	7.60477	2.64681	3.58716	11.5574	1222.53	591.159	25.5857	0.928812	-0.376356	0.0334885	1.7916	0.755005	4.65639	0.555897	36.5638	1268.76	1.12479	1.53215	1.7916	0.521294	0.223853	0.56601	0.0315474	5.57353	0.290301	4.92669	0.374154	36.3824	1256.84	1.07358	1.61074	5.57353	0.722666	0.059518	0.306731	7.12e-07	3	1579	o
288	153	48	7.04795	2.43297	2.99841	11.4905	815.469	592.188	23.325	0.921657	-0.238936	0.0389029	2.3125	0.669683	4.50043	0.515943	36.3049	1250.77	1.10431	1.51936	2.3125	0.565616	0.201023	0.536577	0.0350407	5.45192	0.136272	4.15604	0.382591	35.7788	1215.56	1.01702	1.57766	5.45192	0.722953	0.0643065	0.315464	8.05e-07	7	955	o
289	313	59	9.75567	2.00391	6.12146	13.2146	1328.65	596.742	27.4056	0.820281	-0.397285	0.0351708	1.25849	0.872674	5.94197	0.636031	35.4169	1189.29	1.20027	1.54279	1.25849	0.477223	0.33825	0.68292	0.0235355	3.33077	0.644773	5.68822	0.458556	34.9692	1157.68	1.17198	1.68935	3.33077	0.634068	0.154222	0.49594	7.43e-07	4	502	o
290	52	24	3.78071	1.12019	1.71796	5.44225	1236.15	592.432	11.834	0.861134	-0.457296	0.0839281	1.06211	0.580898	2.26713	0.65528	39.8075	1520.64	0.863478	1.16052	1.06211	0.442399	0.158451	0.425475	0.0989583	1.79167	0.0404463	1.93359	0.504167	39.875	1535.63	0.712686	1.06971	1.79167	0.465674	0.0809259	0.293714	7.23e-07	3	1579	o
291	288	64	9.77081	3.22815	4.00988	15.2485	1408.78	595.905	32.1126	0.910561	-0.213345	0.0250684	2.83462	0.82032	8.88794	0.507769	32.4231	998.306	1.28486	1.75072	2.83462	0.618203	0.269429	0.648256	0.0202947	7.60088	0.490388	8.45752	0.352886	31.943	965.553	1.2294	1.8184	7.60088	0.792766	0.117101	0.449917	6.37e-07	6	391	o
292	187	55	7.95535	3.31514	1.94341	12.9669	266.215	595.391	27.5511	0.920333	0.259446	0.119875	1.06605	0.73494	3.01096	0.700642	39.149	1467.86	0.927489	1.19778	1.06605	0.455656	0.225021	0.511775	0.0949142	2.62162	0.387007	3.13838	0.583172	39.2027	1475.54	0.867185	1.25989	2.62162	0.6078	0.0854324	0.326109	7.42e-07	3	2211	o
293	171	44	7.0807	1.34439	4.16008	9.491	1204.48	599.347	18.8845	0.780016	-0.709255	0.171738	0.475248	0.701165	1.79517	0.792079	40.495	1580.81	0.769707	0.928633	0.475248	0.332808	0.257459	0.489877	0.131509	0.969231	0.299461	1.69178	0.672308	40.3538	1574.03	0.702439	0.968881	0.969231	0.429971	0.0577898	0.2367	7.19e-07	4	1579	o
294	179	57	7.95702	3.33455	2.63678	13.2951	498.279	596.396	29.9909	0.960258	-0.0540196	0.020395	3.9791	0.718081	8.05717	0.450752	35.7347	1214.09	1.24065	1.75302	3.9791	0.666588	0.201155	0.569506	0.0209194	10.1742	0.318241	8.46176	0.334866	35.6288	1204.42	1.20856	1.78209	10.1742	0.837852	0.113867	0.439996	7.76e-07	5	284	o
295	104	32	5.37536	0.806483	3.74401	7.03243	362.962	601.259	14.0976	0.713463	0.726269	0.0590584	1.1337	0.713458	2.97825	0.637047	38.0585	1381.84	0.976671	1.29463	1.1337	0.451002	0.219361	0.522598	0.0496324	2.86765	0.252684	2.91863	0.446453	37.4559	1339.69	0.91982	1.36835	2.86765	0.578468	0.0788354	0.325922	7.56e-07	3	226	o
296	190	61	8.01899	3.16983	2.71464	13.9516	598.498	601.871	27.7805	0.93682	-0.275999	0.136241	0.607306	0.565019	1.69808	0.754795	41.0609	1625.6	0.769276	0.973574	0.607306	0.367266	0.167346	0.403598	0.0882928	1.42657	0.186957	1.8773	0.605594	41.0909	1628.39	0.763398	1.12126	1.42657	0.491971	0.0180753	0.142282	7.94e-07	4	822	o
297	628	128	18.0579	9.02033	4.27931	33.2538	487.551	615.32	72.6093	0.986654	0.366879	0.0364871	1.63597	0.768637	4.5355	0.589832	36.399	1255.61	1.14133	1.5391	1.63597	0.519141	0.23746	0.582641	0.0260372	4.30095	0.414419	4.67238	0.42786	36.2895	1248.62	1.10103	1.6759	4.30095	0.686724	0.0688715	0.335663	7.57e-07	5	1462	o
298	217	56	8.30436	2.85831	3.32627	12.6403	568.659	608.294	28.1603	0.922848	-0.267551	0.0238834	2.28849	0.805067	6.86992	0.529994	35.4761	1193.39	1.23875	1.68717	2.28849	0.57581	0.255351	0.624294	0.0185675	6.86667	0.402465	6.74583	0.365832	34.8303	1147.83	1.18933	1.80324	6.86667	0.758534	0.098514	0.412832	7.83e-07	3	822	o
299	342	85	12.7133	6.04419	3.51694	22.2645	424.595	616.986	49.2145	0.980908	0.486153	0.0788593	0.798354	0.76921	2.72961	0.704527	39.9292	1524.56	0.962038	1.22126	0.798354	0.401659	0.262516	0.55552	0.0622189	1.77308	0.478551	2.70014	0.580284	39.85	1519.61	0.932396	1.3349	1.77308	0.525832	0.0979221	0.358355	7.44e-07	3	776	o
300	155	41	6.82607	1.70793	3.36409	9.55855	204.876	613.601	20.3037	0.843391	0.725171	0.0207956	3.25824	0.777172	8.31112	0.444819	33.9322	1093.34	1.2619	1.7638	3.25824	0.620462	0.22197	0.596836	0.0180718	9.02609	0.365822	8.11637	0.295362	33.287	1048.68	1.2052	1.80735	9.02609	0.808056	0.102225	0.420625	6.88e-07	2	270	o
301	270	65	9.39938	3.25713	4.63728	15.1743	536.941	612.842	32.0539	0.926012	0.0416373	0.0232464	3.62898	0.798758	10.0164	0.496628	32.3237	996.048	1.28165	1.76632	3.62898	0.653866	0.253383	0.63324	0.0281622	8.41176	0.46838	8.91145	0.412645	31.4216	935.026	1.22567	1.77222	8.41176	0.786403	0.132733	0.471932	7.72e-07	5	376	o
302	626	112	12.9594	4.40351	0.809551	18.1382	290.253	624.005	36.1314	0.590003	-0.181051	0.0467831	0.87013	0.866919	4.26917	0.68026	36.6355	1272.96	1.12842	1.39982	0.87013	0.409113	0.355208	0.673582	0.0307879	2.37665	0.625165	4.17026	0.499081	36.3842	1255.35	1.09898	1.56325	2.37665	0.568229	0.150736	0.474302	7.2e-07	4	2211	o
303	164	56	7.75203	3.46817	1.94643	13.3297	688.321	615.11	29.4845	0.964149	0.109601	0.0356173	2.11566	0.601675	3.65569	0.518432	37.9982	1373.51	1.05221	1.4896	2.11566	0.54414	0.156868	0.47325	0.0280377	5.97521	0.048089	4.13853	0.354508	38.2397	1393.12	1.00343	1.59552	5.97521	0.720295	0.0587842	0.303495	8.37e-07	4	327	o
304	187	46	7.40889	1.50585	4.60546	10.3605	1385.96	617.555	20.3855	0.776151	-0.412636	0.0495495	1.24174	0.806266	4.20475	0.64039	37.0285	1303.48	1.08552	1.41439	1.24174	0.470108	0.274664	0.602147	0.0388455	2.86111	0.534281	4.07171	0.517446	36.6806	1279.83	1.0378	1.50504	2.86111	0.61888	0.123934	0.424646	6.99e-07	5	368	o
305	153	45	6.9898	2.35282	2.66379	11.0718	1415.45	617.179	22.9894	0.911152	-0.410554	0.0506194	1.31203	0.737346	3.49764	0.619173	37.3496	1327.06	1.04008	1.38358	1.31203	0.478808	0.233808	0.55382	0.0385374	2.87963	0.40332	3.41304	0.468682	37.1204	1311.34	1.00152	1.47418	2.87963	0.60183	0.0973574	0.374216	6.37e-07	5	262	o
306	223	62	8.66445	2.99891	4.34018	14.3616	810.311	618.532	28.5737	0.920354	-0.246302	0.0479025	1.06616	0.838494	4.30067	0.637913	37.9415	1369.41	1.10022	1.41903	1.06616	0.431503	0.299448	0.62715	0.0416095	2.70988	0.583875	4.25609	0.457262	37.6481	1349.73	1.05011	1.47628	2.70988	0.567438	0.197407	0.525618	8.55e-07	6	629	o
307	218	66	9.06404	3.9278	2.29434	15.5736	1454.11	618.265	34.7012	0.959734	-0.035434	0.0257323	2.54474	0.803949	7.48999	0.522399	35.3947	1191.19	1.222	1.68484	2.54474	0.59742	0.236382	0.602844	0.0206444	7.13497	0.461342	7.62292	0.375936	35.2331	1178.11	1.19262	1.7779	7.13497	0.773206	0.117368	0.445898	5.35e-07	2	504	o
308	361	82	11.3778	4.27941	4.66187	19.0084	868.098	621.997	39.4059	0.941042	-0.14575	0.0318981	2.29525	0.80752	6.9623	0.586567	34.7278	1145.39	1.20416	1.65108	2.29525	0.588054	0.248888	0.612033	0.0303982	5.47619	0.554425	7.14508	0.46689	34.6531	1141.18	1.15564	1.70186	5.47619	0.721185	0.128041	0.455739	8.23e-07	8	655	o
309	364	77	10.7967	3.04001	5.64726	16.7377	1165.73	627.357	31.3175	0.840743	-1.02621	0.0707183	0.87803	0.765666	2.87346	0.694621	37.8705	1365.89	1.00216	1.27546	0.87803	0.420803	0.273408	0.576469	0.052858	1.86242	0.478524	2.78572	0.554619	37.8221	1363.51	0.967992	1.38657	1.86242	0.532128	0.0976648	0.364281	7.65e-07	2	814	o
310	143	37	6.33336	1.02037	4.59245	8.06955	1283.48	620.462	16.5505	0.725468	-0.182105	0.0932516	0.708911	0.696538	2.16804	0.714455	39.105	1465.39	0.876292	1.10865	0.708911	0.379154	0.235716	0.50635	0.085058	1.45946	0.34401	2.11241	0.583784	38.9009	1452.86	0.823683	1.15029	1.45946	0.484216	0.0731801	0.289252	7.92e-07	4	281	o
311	182	49	7.41049	1.95621	3.85882	11.0533	1114.86	622.148	22.2707	0.847955	-0.217505	0.0326618	1.56765	0.829522	5.59781	0.583826	36.4572	1261.82	1.17268	1.55575	1.56765	0.505468	0.279045	0.629446	0.0267801	4.42754	0.525881	5.66923	0.427113	36.0652	1235.51	1.11873	1.63976	4.42754	0.690633	0.127611	0.447543	7.27e-07	5	333	o
312	88	33	4.9879	1.59909	2.40332	7.38878	1080.98	621.536	16.2603	0.894631	-0.137959	0.0608948	1.53061	0.54662	2.688	0.581633	38.8707	1444.36	0.934745	1.30651	1.53061	0.492666	0.13822	0.419924	0.0833058	3.21818	-0.122255	2.4338	0.449733	38.7455	1443.45	0.785858	1.15267	3.21818	0.593849	0.085034	0.311935	7.14e-07	6	216	o
313	439	90	11.854	3.47226	4.81127	19.2537	660.382	628.624	34.3793	0.796282	0.223803	0.0302863	1.73579	0.856057	7.02944	0.61035	35.847	1220.59	1.23185	1.62355	1.73579	0.537714	0.304933	0.665141	0.019796	4.49587	0.636915	7.19121	0.431412	35.6584	1206.12	1.22228	1.78109	4.49587	0.692213	0.153207	0.505817	8.32e-07	4	710	o
314	105	35	5.48183	1.23163	3.65725	7.90686	823.758	623.702	15.0237	0.778542	-0.29972	0.205549	0.54902	0.591848	1.67257	0.77591	41.3838	1656.1	0.714888	0.898483	0.54902	0.35452	0.186721	0.411011	0.255958	1.0411	0.103136	1.58041	0.726027	41.3973	1665.63	0.600787	0.860375	1.0411	0.45099	0.0835551	0.268845	8.58e-07	8	629	o
315	228	54	8.88832	3.09845	4.2086	13.7359	417.816	632.722	29.1663	0.931672	0.539456	0.0637171	1.05904	0.727063	2.94008	0.66679	39.0689	1456.59	0.991445	1.28664	1.05904	0.451737	0.231007	0.534231	0.0503897	2.20219	0.416536	2.88716	0.513758	39.1749	1466.5	0.949887	1.36373	2.20219	0.552575	0.0752556	0.318043	7.26e-07	3	861	o
316	311	78	9.86927	3.13464	4.7585	15.2678	61.9257	637.142	29.9174	0.821817	-0.0608359	0.0744134	0.787579	0.795943	2.9298	0.718542	38.4221	1408.88	0.979495	1.23099	0.787579	0.407681	0.29669	0.590539	0.0593056	1.77917	0.529294	2.88989	0.607905	38.2208	1394.73	0.952157	1.32019	1.77917	0.544023	0.128418	0.40707	4.74e-07	4	1123	o
317	429	109	14.8028	7.20487	3.99593	27.1184	522.281	638.654	58.6154	0.983701	0.239294	0.0180498	3.67752	0.775415	9.18739	0.446407	33.4625	1063.59	1.2986	1.83503	3.67752	0.654919	0.219477	0.603236	0.0124698	11.0381	0.332063	9.26285	0.289879	33.1378	1038.79	1.25082	1.97002	11.0381	0.859545	0.0639298	0.349276	7.51e-07	4	1462	o
318	198	47	7.54257	1.01533	5.21802	9.42575	1081.49	636.679	17.5986	0.446447	0.306936	0.0448836	1.28147	0.802362	4.24197	0.615559	36.8769	1291.73	1.09921	1.43987	1.28147	0.470736	0.264955	0.596496	0.0344897	3.41139	0.449792	4.10009	0.439318	36.5886	1272.98	1.03589	1.53281	3.41139	0.628845	0.085642	0.35799	7.58e-07	5	607	o
319	234	58	8.66639	2.44191	4.80478	13.0826	88.7499	637.722	26.2262	0.882998	-0.149472	0.0268881	2.10048	0.769057	5.54761	0.523625	34.6459	1135.07	1.1948	1.64896	2.10048	0.546368	0.222073	0.581057	0.0195745	6.19786	0.30713	5.4726	0.338174	34.1551	1102.41	1.129	1.76906	6.19786	0.735793	0.0651098	0.335029	5.23e-07	3	1123	o
320	342	81	11.5368	4.85096	3.33719	20.2164	330.692	639.246	41.667	0.954045	0.260764	0.0262046	3.03574	0.795116	8.40846	0.491448	32.9448	1031.07	1.25143	1.72899	3.03574	0.629751	0.239363	0.612432	0.0209363	9.49826	0.419669	9.18348	0.330621	32.8293	1022.84	1.2128	1.83047	9.49826	0.833121	0.117818	0.452549	7.1e-07	4	2211	o
321	158	49	6.49934	1.52943	2.46838	9.32689	1071.42	643.977	15.7701	0.419269	0.758267	0.0791708	1.0239	0.66382	2.52284	0.67114	40.3217	1556.79	0.929774	1.23489	1.0239	0.445863	0.185987	0.472974	0.0761806	2.21667	0.188365	2.36556	0.549314	40.2667	1558.08	0.835339	1.22603	2.21667	0.564459	0.0395263	0.219625	7.77e-07	5	607	o
322	495	100	13.6442	5.91787	0.513128	23.8177	838.852	645.35	47.6838	0.932227	0.00216142	0.0302574	1.62535	0.820153	5.51868	0.58484	35.9153	1221.98	1.19456	1.58456	1.62535	0.513586	0.280026	0.634879	0.0215683	3.98241	0.542335	5.35079	0.438739	35.4899	1192.59	1.15095	1.72998	3.98241	0.669234	0.104551	0.416823	8.88e-07	7	699	o
323	44	20	3.37422	0.813738	2.05	4.49472	6.00153	640.073	10.0943	0.832327	-0.486475	0.486662	0.304348	0.0517016	1.16047	0.847826	41.7681	1713.87	0.373247	0.464864	0.304348	0.266875	0.0192467	0.0948333	0.531888	0.285714	-0.00900901	1.14158	0.857143	41.9286	1729.73	0.341915	0.427923	0.285714	0.259825	0.0474035	0.143399	3.59e-07	4	608	o
324	142	48	6.79962	2.63769	2.50737	11.1932	761.933	643.457	24.1447	0.939331	-0.34402	0.0749453	1.12165	0.758544	3.32267	0.642062	39.8887	1520.9	0.994837	1.30732	1.12165	0.452132	0.242956	0.550816	0.0452154	2.75238	0.4557	3.52837	0.496725	40.0286	1532.11	0.980554	1.43839	2.75238	0.601091	0.124272	0.416572	8.99e-07	3	293	o
325	115	35	5.78258	1.3267	3.59785	8.02328	20.0256	646.034	16.568	0.822926	0.606546	0.0733886	0.926768	0.693229	2.51052	0.663889	39.3308	1479.82	0.92887	1.21521	0.926768	0.413866	0.211346	0.499622	0.047123	2.59524	0.263276	2.76134	0.472129	39.0476	1458.92	0.910074	1.38906	2.59524	0.575021	0.0621777	0.292032	3.88e-07	5	608	o
326	64	24	4.10755	0.674104	2.63128	5.1888	1326.51	644.612	11.1533	0.737542	-0.448366	0.0636014	1.33491	0.56426	2.53177	0.592925	38.4292	1410.97	0.93018	1.26185	1.33491	0.464314	0.155591	0.437903	0.0688776	3.14286	-0.00653595	2.56122	0.478992	38.5714	1428.57	0.816063	1.24375	3.14286	0.614446	0.0290104	0.189606	8e-07	6	130	o
327	378	71	10.6599	2.35243	5.20847	14.8215	1284.09	654.642	27.6209	0.643879	-0.415529	0.0394302	1.24424	0.858199	5.38725	0.657258	35.3927	1187.27	1.17329	1.50979	1.24424	0.483131	0.330851	0.671103	0.0267642	3.13836	0.64565	5.42835	0.492059	35.2579	1177.31	1.15901	1.65393	3.13836	0.629421	0.161007	0.501441	8.37e-07	5	2341	o
328	249	55	8.5923	1.96173	5.22201	11.6532	1405.29	649.589	25.038	0.834513	-0.00385677	0.028241	1.52159	0.860015	6.43485	0.580262	34.9812	1159.91	1.22187	1.60948	1.52159	0.493393	0.306944	0.664909	0.0208903	4.8932	0.572929	6.72879	0.395588	34.7087	1141.27	1.19387	1.74443	4.8932	0.701673	0.14678	0.491361	6.68e-07	4	398	o
329	562	107	16.1313	7.17396	5.03707	28.1175	873.137	658.546	58.5737	0.973642	-0.476824	0.0423475	1.21488	0.81188	4.22899	0.644305	37.6962	1350.13	1.11163	1.45654	1.21488	0.470604	0.273877	0.608364	0.0314938	3.13362	0.513515	4.22068	0.486185	37.4698	1334.95	1.06649	1.56404	3.13362	0.629891	0.0905179	0.371234	8.9e-07	6	2109	o
330	351	79	11.6419	4.97714	4.0437	20.3342	163.594	655.364	42.8299	0.963348	0.352001	0.0485617	1.34202	0.792372	4.23179	0.630913	36.3468	1254.91	1.08588	1.43561	1.34202	0.491386	0.260771	0.591451	0.0424465	3.27562	0.48069	4.15382	0.484235	36.265	1250.02	1.04171	1.46927	3.27562	0.639575	0.0930722	0.36553	6.19e-07	2	553	o
331	50	22	3.55897	0.800977	2.23838	4.6526	710.517	647.753	10.5014	0.807784	-0.0024479	0.0961719	0.88125	0.474561	1.83858	0.656875	41.1437	1630.92	0.789704	1.06073	0.88125	0.390021	0.117766	0.352564	0.130102	1.07143	0.171598	1.64668	0.635714	41.6429	1680.5	0.66739	0.920145	1.07143	0.430943	0.0282169	0.161219	8.82e-07	4	798	o
332	299	62	9.82153	2.75328	5.20288	14.8108	221.98	657.748	29.935	0.890412	1.02208	0.05089	1.10396	0.81385	3.96524	0.65115	36.8335	1288.19	1.09227	1.41335	1.10396	0.453419	0.281524	0.608815	0.0319004	3.21774	0.499917	4.21721	0.475609	36.6855	1277.37	1.08049	1.59954	3.21774	0.62939	0.106485	0.405771	6.63e-07	5	457	o
333	235	62	9.47733	4.21584	3.22096	16.3969	454.199	655.884	35.3212	0.96398	0.491017	0.0346169	1.91294	0.685635	4.04255	0.540721	37.4148	1329.73	1.09023	1.51469	1.91294	0.532499	0.17813	0.506315	0.0261228	4.98883	0.227473	4.2289	0.36851	37.2905	1322.48	1.03378	1.64863	4.98883	0.69558	0.0493863	0.283005	7.14e-07	3	861	o
334	267	55	8.8482	1.9773	5.43721	11.8919	787.521	652.735	25.1824	0.825589	0.0226126	0.0539072	0.939363	0.837226	3.88548	0.674615	38.2898	1395.77	1.07199	1.35603	0.939363	0.426469	0.314457	0.630141	0.0333988	2.50455	0.559833	3.84499	0.490977	38.1045	1381.49	1.05575	1.52843	2.50455	0.57591	0.124466	0.428497	9.14e-07	6	413	o
335	269	70	9.91897	3.99095	4.40947	16.6635	668.203	653.691	35.2188	0.957756	-0.139587	0.0868441	0.744792	0.716462	2.31339	0.705104	39.2594	1475.7	0.903306	1.13627	0.744792	0.385231	0.258685	0.535276	0.0715342	1.71296	0.342504	2.30264	0.571296	39.2593	1477.68	0.864193	1.23417	1.71296	0.521472	0.0606672	0.272599	8.58e-07	5	798	o
336	416	103	13.8436	6.51255	3.69862	24.7955	333.069	657.778	52.473	0.978421	0.0236039	0.0538774	1.09358	0.773893	3.41828	0.663369	37.9225	1368.07	1.05121	1.37303	1.09358	0.457715	0.261152	0.581338	0.0394438	2.8852	0.424848	3.5082	0.507989	37.8338	1363.41	1.00638	1.52103	2.8852	0.621667	0.0944387	0.374097	6.92e-07	2	663	o
337	447	95	13.7532	6.11744	2.07891	23.7058	1205.39	669.705	51.0057	0.960858	-1.02138	0.0431536	1.33354	0.797455	4.29196	0.625288	36.4063	1257.63	1.11047	1.46135	1.33354	0.485334	0.2635	0.598508	0.0340314	3.5928	0.433013	4.16832	0.45802	36.2521	1247.73	1.05756	1.55028	3.5928	0.649637	0.074068	0.335272	8.68e-07	3	828	o
338	358	92	12.4706	5.88754	3.86957	22.3844	719.198	660.118	48.8138	0.976574	-0.091234	0.0322942	2.27322	0.758014	5.69701	0.552409	35.313	1181.86	1.17584	1.59861	2.27322	0.576741	0.251509	0.607168	0.0272199	5.65942	0.430541	5.96912	0.421752	35.087	1167.84	1.12196	1.66965	5.65942	0.738876	0.115794	0.430733	9.02e-07	3	496	o
339	80	27	4.75306	1.09413	2.65067	6.37909	268.66	661.331	13.786	0.830947	0.573311	0.118061	0.754647	0.558576	1.85479	0.707435	39.8476	1528.2	0.78954	1.02325	0.754647	0.390579	0.155796	0.398454	0.0975546	2.04839	0.0971737	2.13443	0.537097	39.7258	1518.76	0.786428	1.09556	2.04839	0.546577	0.0470825	0.226836	6.79e-07	4	250	o
340	402	77	11.4813	3.6259	5.07541	17.888	1313.24	668.661	36.8705	0.908357	-0.226107	0.0307713	1.22733	0.894745	6.83027	0.633153	34.8687	1152.9	1.24134	1.59086	1.22733	0.470633	0.353883	0.703853	0.019654	3.68529	0.674738	6.66512	0.452229	34.6265	1135.9	1.20609	1.76637	3.68529	0.655057	0.164006	0.52022	8.29e-07	5	2341	o
341	252	52	8.68988	1.88503	5.82848	11.9442	1380.85	667.557	25.1203	0.824784	-0.350269	0.0268927	2.7238	0.837897	9.40142	0.509155	31.464	941.683	1.28449	1.73152	2.7238	0.609076	0.282191	0.658668	0.0235385	7.54187	0.533694	9.08683	0.379735	31.0493	913.683	1.23521	1.76389	7.54187	0.799954	0.147737	0.495234	7.25e-07	3	2341	o
342	579	87	14.2391	4.29992	7.75779	22.3182	89.1488	678.338	41.847	0.888891	0.680573	0.0889338	0.612141	0.763276	2.29294	0.740639	38.6288	1425.98	0.927055	1.1332	0.612141	0.360152	0.288951	0.563921	0.0586518	1.62302	0.422237	2.40457	0.587652	38.4722	1415.34	0.904326	1.30373	1.62302	0.51718	0.076655	0.31417	5.04e-07	3	832	o
343	94	30	5.12409	0.839512	3.36733	6.3827	12.8215	666.783	13.4501	0.733575	0.39993	0.181675	0.470405	0.56731	1.54358	0.790966	40.7321	1604.37	0.698837	0.860329	0.470405	0.330021	0.191891	0.408543	0.143326	0.902778	0.244125	1.59717	0.665278	40.7639	1608.29	0.678891	0.925367	0.902778	0.406505	0.0733355	0.260809	3.68e-07	4	588	o
344	241	53	8.70584	2.51513	4.36274	12.8068	755.929	670.677	27.3112	0.893172	-0.434132	0.0347065	2.05524	0.819601	6.69635	0.559751	34.7112	1144.39	1.19011	1.606	2.05524	0.560717	0.273426	0.631427	0.0267792	5.82383	0.484411	6.64775	0.392535	34.2487	1111.12	1.16767	1.70215	5.82383	0.749815	0.107608	0.41952	9.32e-07	3	419	o
345	285	62	10.2176	3.62555	3.96407	15.7502	1361.58	677.185	33.8564	0.937076	0.792381	0.0504542	1.07108	0.797222	3.64101	0.66179	37.3554	1325.47	1.07895	1.39575	1.07108	0.449362	0.276332	0.600659	0.0366363	2.86842	0.444855	3.58349	0.509871	37.2281	1318.3	1.02259	1.53037	2.86842	0.615162	0.107612	0.399682	7.64e-07	4	2341	o
346	127	46	6.96041	3.04056	1.72672	11.765	27.9626	675.827	25.0925	0.960654	0.594108	0.30347	0.345154	0.365674	1.27206	0.83026	41.4421	1675.11	0.523094	0.63135	0.345154	0.283955	0.0925832	0.243822	0.228852	0.576087	0.114662	1.32535	0.725	41.5543	1682.72	0.542243	0.727144	0.576087	0.322526	0.0318704	0.15256	3.94e-07	4	588	o
347	89	31	5.04451	1.36071	3.07824	7.37638	1116.87	675.7	15.3726	0.870606	-1.20066	0.150239	0.566667	0.53211	1.60556	0.760667	40.5333	1585.77	0.734849	0.928348	0.566667	0.354826	0.152224	0.37661	0.143333	0.933333	0.129984	1.53639	0.673333	40.5667	1594.35	0.65248	0.942707	0.933333	0.415393	0.0282317	0.1632	8.69e-07	2	474	o
348	42	19	3.20052	0.453218	2.38938	3.93014	1283.65	671.6	8.50094	0.664384	-0.142952	0.154418	0.616541	0.403522	1.51682	0.718797	40.6316	1597.26	0.683935	0.880294	0.616541	0.339812	0.126469	0.334745	0.109641	1.47826	-0.0983146	1.67297	0.573913	40.7826	1612.94	0.636299	1.00809	1.47826	0.466745	0.0618423	0.249612	8.54e-07	4	2341	o
349	347	77	11.2271	4.14653	4.5347	18.307	815.624	675.534	37.8788	0.939976	-0.141465	0.0231439	2.1973	0.834788	7.64992	0.537597	34.5442	1131.37	1.27307	1.71842	2.1973	0.569916	0.272451	0.646861	0.0185945	5.72993	0.535164	7.16338	0.382743	33.9416	1089.73	1.21846	1.82697	5.72993	0.733919	0.111625	0.440746	9.41e-07	4	2109	o
350	760	178	23.0685	12.0801	3.54666	43.6415	656.064	677.388	92.4448	0.992513	0.072013	0.0612371	1.1128	0.735261	3.1017	0.668625	38.0617	1379.9	1.013	1.32086	1.1128	0.462817	0.246153	0.556592	0.0439291	2.69572	0.339745	3.04143	0.530544	37.8766	1368.1	0.962802	1.44611	2.69572	0.605662	0.0709317	0.317627	8.72e-07	4	1081	o
351	295	70	10.2416	3.58788	4.50179	16.5886	972.813	682.617	33.6162	0.931812	-0.295885	0.0431864	1.18079	0.815654	4.20264	0.631073	37.9454	1369.55	1.09546	1.42842	1.18079	0.458723	0.282642	0.612461	0.0287874	3.36515	0.501307	4.37396	0.451796	37.9212	1367.74	1.07538	1.58355	3.36515	0.626588	0.0912383	0.374813	8.88e-07	3	506	o
352	590	120	17.5932	8.52839	1.23654	32.2285	1219.94	697.151	68.0776	0.977441	-0.8067	0.0324857	1.45548	0.844822	5.6897	0.611363	35.9664	1226.65	1.19076	1.56658	1.45548	0.500804	0.289743	0.641769	0.0220067	3.76091	0.584293	5.52351	0.452939	35.8025	1214.48	1.15942	1.7106	3.76091	0.666562	0.11507	0.434151	9.06e-07	6	966	o
353	269	92	12.3262	6.4684	2.25	23.1638	840.244	685.218	51.6729	0.989942	-0.260434	0.0655328	1.32283	0.550338	2.47091	0.615109	39.1837	1469.08	0.914621	1.2598	1.32283	0.478873	0.138121	0.412897	0.0579656	2.78075	0.000164514	2.3906	0.473671	39.123	1469.34	0.827286	1.29049	2.78075	0.596271	0.00831877	0.103548	9.47e-07	5	2109	o
354	505	133	19.2323	10.3608	2.69339	36.6856	182.118	699.519	79.6823	0.993827	0.489345	0.0377632	1.92312	0.687263	4.07466	0.550877	36.1801	1241.68	1.09025	1.51514	1.92312	0.538458	0.17993	0.508787	0.0281131	5.08462	0.240064	4.34542	0.372575	36.0897	1236.29	1.04706	1.63816	5.08462	0.703765	0.0409584	0.257305	6.07e-07	3	901	o
355	219	54	8.94455	3.29123	4.21153	14.3332	199.376	691.468	30.4077	0.944786	0.733642	0.0261551	2.30541	0.782293	6.29476	0.528245	34.491	1126.82	1.20511	1.66337	2.30541	0.57521	0.226812	0.588707	0.0205457	5.84431	0.431172	6.13715	0.364585	33.9521	1090.26	1.1565	1.74459	5.84431	0.735245	0.0949331	0.399495	6.26e-07	4	331	o
356	62	25	4.05155	0.900301	2.60277	5.52941	892.832	684.917	11.8536	0.822723	-0.271226	0.182181	0.433498	0.535566	1.46669	0.789163	41.8424	1696.76	0.66799	0.805123	0.433498	0.306897	0.169697	0.372404	0.164898	0.8	0.0841121	1.43673	0.668571	41.7143	1691.9	0.593107	0.847042	0.8	0.36967	0.0171672	0.120666	9.24e-07	5	867	o
357	395	90	14.5209	6.91198	3.99051	25.9866	861.641	700.679	54.6796	0.983614	-0.678137	0.0357182	1.7238	0.734359	4.24459	0.576479	37.0425	1301.92	1.11669	1.52511	1.7238	0.524555	0.208215	0.546299	0.0280683	4.25	0.33059	4.17444	0.432108	37.0772	1305.55	1.06179	1.61518	4.25	0.688168	0.0490137	0.279193	9.59e-07	5	867	o
358	66	26	4.28856	1.18743	2.17639	6.07376	245.493	690.605	13.3795	0.871934	0.421609	0.0431349	1.97685	0.52385	3.07587	0.528241	37.8565	1364.52	1.00284	1.43661	1.97685	0.530159	0.116481	0.403479	0.0554354	4.81395	-0.0431878	3.30733	0.414301	37.8372	1369.26	0.893429	1.33147	4.81395	0.70177	0.0667044	0.296284	6.52e-07	4	192	o
359	183	53	7.78107	2.69917	2.96515	12.7042	1447.66	698.408	24.3955	0.900565	-0.280185	0.0668176	0.948438	0.715522	2.66698	0.668281	38.2578	1395.95	0.972055	1.26004	0.948438	0.424423	0.234949	0.53384	0.0493912	2.29371	0.393457	2.8908	0.513122	38.4615	1412.04	0.954602	1.39031	2.29371	0.565049	0.0837648	0.338309	5.39e-07	3	567	o
360	238	62	8.97309	3.39227	3.57075	14.64	1051.31	697.728	31.8606	0.943112	-0.192766	0.0212745	2.28689	0.822407	7.43858	0.496597	35.7249	1211.51	1.25697	1.7145	2.28689	0.553485	0.25874	0.631839	0.0167568	7.07027	0.440428	7.31757	0.338989	35.2324	1176.5	1.19869	1.83313	7.07027	0.763788	0.10022	0.419349	9.17e-07	4	341	o
361	83	27	4.71301	0.458299	3.65449	5.48261	1123.9	700.517	11.6394	0.527003	0.377821	0.0198368	3.4539	0.709164	6.93789	0.41698	35.0142	1161.92	1.2263	1.74134	3.4539	0.618536	0.195847	0.561078	0.0237001	9.59322	0.254765	7.43637	0.27443	34.9831	1160.15	1.16	1.68527	9.59322	0.803572	0.130176	0.457336	9.24e-07	4	163	o
362	220	55	8.27388	2.61927	4.53577	13.6539	396.132	702.184	26.4151	0.906004	-0.0417293	0.0470179	1.34224	0.776755	4.0062	0.644911	37.1692	1312.74	1.08521	1.44467	1.34224	0.492904	0.267266	0.599669	0.043386	3.11561	0.492623	4.07031	0.537711	37.2197	1316.89	1.05725	1.46874	3.11561	0.638128	0.17991	0.502002	6.81e-07	2	400	o
363	157	42	6.8363	1.66111	3.54306	9.83826	735.846	705.9	19.4963	0.82276	-0.970129	0.0649899	1.06691	0.676629	2.64967	0.646655	38.8101	1437.84	0.964223	1.27057	1.06691	0.441689	0.202516	0.498962	0.0489452	2.7377	0.29786	2.94954	0.492093	38.7049	1431.66	0.934561	1.39244	2.7377	0.599669	0.0917022	0.353918	9.67e-07	3	302	o
364	109	34	5.66036	1.37454	3.40593	8.03377	983.676	704.032	16.5949	0.84747	-0.676738	0.0702086	0.94385	0.687322	2.5093	0.653209	39.8529	1519.31	0.939966	1.22933	0.94385	0.409867	0.214821	0.506076	0.0584515	2.81481	0.156866	2.66926	0.479739	39.8025	1519.16	0.875651	1.28399	2.81481	0.59608	0.0422599	0.232216	9.33e-07	5	253	o
365	348	74	11.4395	4.36218	3.92695	18.8677	1007.6	708.745	39.0791	0.944429	-0.448726	0.0288103	2.65689	0.799128	7.61338	0.51187	33.4303	1060.64	1.23018	1.68586	2.65689	0.60596	0.245849	0.613671	0.0296397	7.25818	0.403919	7.08825	0.378429	32.9164	1025.1	1.16728	1.71163	7.25818	0.790417	0.0914021	0.388852	9.42e-07	7	458	o
366	271	64	9.30987	2.53668	3.32853	13.9581	1260.57	711.253	26.8559	0.828999	-1.46074	0.0386242	1.38374	0.840034	5.32511	0.618948	36.8076	1286.49	1.16245	1.52333	1.38374	0.488089	0.292675	0.63783	0.0258799	3.8371	0.538543	5.15759	0.448344	36.7511	1281.74	1.12885	1.66672	3.8371	0.66091	0.121961	0.44119	8.99e-07	5	1532	o
367	66	29	4.16998	0.968044	1.79609	5.7101	378.52	703.259	11.0412	0.609711	0.19072	0.0461451	1.77619	0.648665	3.52777	0.540476	38.6714	1425.74	1.02299	1.39035	1.77619	0.509948	0.181165	0.491857	0.039375	4.55	0.108717	3.5525	0.382873	38.3	1400.4	0.9538	1.45543	4.55	0.676396	0.0915212	0.360951	6.76e-07	2	400	o
368	137	44	7.04119	3.00106	2.44146	11.7804	885.157	708.619	25.6796	0.959135	-0.538143	0.0274135	3.6824	0.574094	5.32303	0.440724	35.7468	1211.07	1.14237	1.66091	3.6824	0.652027	0.12933	0.452982	0.0226949	9.22642	0.0672137	5.94562	0.290263	36.1698	1241.86	1.07982	1.68769	9.22642	0.812713	0.0671407	0.33262	9.62e-07	4	272	o
369	431	78	12.0428	3.99764	3.73009	19.1984	1165.65	721.803	38.8402	0.898352	1.16889	0.0289454	1.96093	0.862046	8.10721	0.575183	32.7133	1015.66	1.26189	1.67994	1.96093	0.554219	0.305255	0.673812	0.0209856	5.57407	0.623144	8.39549	0.40406	32.7698	1017.57	1.24895	1.81265	5.57407	0.742863	0.150796	0.505904	9.52e-07	4	709	o
370	105	36	5.71513	2.04882	2.47222	8.7433	918.873	712.6	19.4656	0.929904	-0.447261	0.105641	0.785311	0.519646	1.81743	0.69209	40.4463	1575.51	0.784931	1.03102	0.785311	0.389261	0.141095	0.380631	0.118735	0.985075	0.223666	1.63444	0.668657	40.2985	1569.46	0.701709	0.996471	0.985075	0.431647	0.0321654	0.179028	9.59e-07	4	243	o
371	93	31	5.12883	1.29314	2.46727	7.28611	1219.38	717.004	15.1005	0.826748	-0.981551	0.057939	1.61905	0.581752	2.93551	0.567619	37.5048	1342.22	0.952045	1.31939	1.61905	0.501727	0.146436	0.43379	0.0469892	3.42857	0.0684556	2.84026	0.407283	37.4921	1343.67	0.889701	1.35598	3.42857	0.605015	0.0370578	0.223405	9.28e-07	6	188	o
372	250	55	8.55292	1.55601	4.94599	11.7314	1416.31	721.292	21.5556	0.670064	-0.972697	0.0267265	2.28111	0.793548	6.52455	0.519209	34.77	1146.17	1.20884	1.65258	2.28111	0.569918	0.23671	0.598614	0.0253213	6.03365	0.402703	6.0508	0.357084	34.9087	1154.49	1.14	1.6731	6.03365	0.740959	0.0831722	0.367621	6.23e-07	5	1439	o
373	201	48	7.673	1.88564	4.28499	10.4894	1116.19	725.938	22.7698	0.847801	1.38004	0.0357514	1.68889	0.8073	5.38217	0.581438	35.3861	1186.56	1.17027	1.55364	1.68889	0.524852	0.270252	0.620158	0.0323537	4.43421	0.420018	4.82271	0.426322	34.8421	1150.2	1.088	1.5766	4.43421	0.688937	0.0870644	0.365638	9.68e-07	4	320	o
374	682	111	14.6242	4.76274	3.30675	22.8557	126.07	741.884	44.3529	0.839421	1.07022	0.0862681	0.647871	0.807778	2.68522	0.751301	38.6226	1422.92	0.981896	1.19932	0.647871	0.375525	0.324978	0.609998	0.060046	1.45085	0.584463	2.74575	0.620799	38.6271	1423.6	0.969858	1.34127	1.45085	0.489807	0.153727	0.447405	5.14e-07	2	962	o
375	125	39	5.8725	1.18183	3.62882	7.8733	508.898	727.231	15.1165	0.620274	1.22755	0.0923633	0.814385	0.61222	2.05006	0.690255	40.1647	1547.58	0.868468	1.12639	0.814385	0.398747	0.183831	0.451547	0.0775155	1.79775	0.139369	2.04444	0.573034	40.0449	1544.18	0.779148	1.19522	1.79775	0.534026	0.0366813	0.208994	7.77e-07	3	1441	o
376	408	85	12.1914	4.82935	4.60182	19.4292	677.197	730.506	43.2817	0.952609	0.271462	0.0445432	1.41532	0.824478	5.03176	0.650498	36.1922	1241.47	1.16705	1.51178	1.41532	0.500776	0.314446	0.656585	0.030388	3.92733	0.540698	5.27532	0.491724	36.0959	1234.26	1.15185	1.68033	3.92733	0.680103	0.133468	0.462185	9.67e-07	4	685	o
377	188	55	8.34706	3.19814	2.73502	14.0534	1243.83	728.033	28.2404	0.933443	-0.654711	0.024397	2.91284	0.669706	5.40947	0.466298	34.7324	1140.62	1.17802	1.68097	2.91284	0.605362	0.160991	0.504932	0.0231693	7.68919	0.145429	5.49886	0.338958	34.9324	1155.14	1.09699	1.69827	7.68919	0.790947	0.0482723	0.283858	9.22e-07	5	1532	o
378	321	75	10.6822	4.37342	4.00555	17.8245	290.195	727.396	38.4296	0.953654	0.117095	0.0353252	1.84615	0.777877	5.1557	0.605206	34.764	1142.87	1.177	1.5864	1.84615	0.546362	0.261234	0.615761	0.0257672	4.63019	0.44425	5.16571	0.461631	34.6453	1135.44	1.12807	1.69254	4.63019	0.703953	0.111483	0.425592	6.55e-07	1	486	o
379	41	18	3.18763	0.247504	2.82843	3.60555	655.014	725.012	7.89992	0.548278	0.779238	0.14426	0.615385	0.431632	1.54136	0.729231	41.8615	1697.77	0.676358	0.873644	0.615385	0.351389	0.107664	0.307619	0.1675	1.15	-0.293952	1.44437	0.605	41.65	1693.37	0.50699	0.832636	1.15	0.42325	0.0597591	0.2236	9.4e-07	5	685	o
380	283	59	9.95038	3.20406	4.88115	15.1023	734.551	734.376	31.1276	0.919785	-0.856148	0.0616973	0.923754	0.767536	2.98688	0.678748	38.8886	1442.16	1.00536	1.28806	0.923754	0.421808	0.261981	0.567273	0.0532824	1.99554	0.420044	2.72042	0.5466	38.683	1429.53	0.938579	1.35083	1.99554	0.543771	0.0772665	0.320752	1e-06	2	533	o
381	238	63	9.45698	3.71113	3.35225	15.1343	528.655	735.818	33.1595	0.948062	0.474919	0.0391943	1.67143	0.76642	4.57786	0.591849	37.2976	1321.94	1.11331	1.50387	1.67143	0.522082	0.231387	0.57036	0.0306615	4.36464	0.361241	4.4165	0.419298	37.1381	1311.08	1.05799	1.58605	4.36464	0.681016	0.064798	0.317439	8.1e-07	5	1441	o
382	244	56	8.34736	1.168	5.87307	10.5539	1405.59	737.281	19.6859	0.448699	-1.44648	0.0217096	2.36032	0.854567	9.11482	0.527363	33.2748	1053.03	1.29148	1.75078	2.36032	0.579888	0.280117	0.659274	0.0177456	6.7598	0.585123	9.14676	0.373158	33.201	1046.64	1.25086	1.83518	6.7598	0.769293	0.15683	0.517917	6.47e-07	5	1439	o
383	186	43	7.35295	1.18407	5.38275	9.52705	1427.75	733.795	19.3061	0.722453	0.47939	0.02941	2.03904	0.844114	7.54015	0.558541	33.6426	1074.26	1.23681	1.65052	2.03904	0.558758	0.291186	0.655912	0.0194811	5.67114	0.548877	7.28558	0.376579	33.4832	1061.29	1.20603	1.79962	5.67114	0.733162	0.13287	0.475353	5.85e-07	5	1439	o
384	403	88	12.8009	5.79671	4.03539	23.2289	1012.73	739.928	47.8005	0.969277	-0.347082	0.0275547	1.66575	0.842756	6.29672	0.586483	35.7893	1214.12	1.22628	1.63598	1.66575	0.520145	0.280586	0.643203	0.0226429	4.21975	0.573237	5.9439	0.452206	35.3408	1183.39	1.16716	1.70911	4.21975	0.693768	0.116715	0.436929	9.95e-07	7	965	o
385	262	60	9.36847	3.30095	4.28589	14.4604	1213.08	740.813	31.0528	0.927802	-0.54976	0.0321836	1.63656	0.817197	5.4763	0.570219	36.3677	1254.31	1.18193	1.58206	1.63656	0.509198	0.262179	0.616102	0.0235911	4.96744	0.46596	5.65082	0.393937	36.3628	1253.11	1.15656	1.70756	4.96744	0.702903	0.105089	0.415384	9.49e-07	4	1532	o
386	253	62	9.07951	3.0217	4.22888	14.114	1056.85	738.737	29.2924	0.913147	-0.128508	0.0454374	1.23594	0.797622	4.05355	0.606946	37.6307	1346.63	1.08403	1.39154	1.23594	0.45212	0.300662	0.623577	0.0336398	3.85581	0.431014	4.38832	0.431478	37.614	1345.71	1.0624	1.53574	3.85581	0.657741	0.110269	0.405072	9.93e-07	7	596	o
387	333	71	10.7762	3.73697	4.75819	17.2196	943.783	742.736	35.813	0.93061	-0.301575	0.0262888	1.89339	0.830525	6.58603	0.559001	34.3959	1120.29	1.23208	1.6541	1.89339	0.541545	0.276836	0.642079	0.018859	5.20863	0.560934	6.93149	0.394109	34.295	1113.25	1.20817	1.80595	5.20863	0.718474	0.120616	0.454862	9.97e-07	4	465	o
388	148	41	6.9886	2.3729	2.93708	10.6217	1358.72	743.982	22.9418	0.926439	-0.600927	0.0423546	1.39612	0.784694	4.24216	0.611845	37.4583	1332.14	1.11858	1.46923	1.39612	0.488562	0.256783	0.592739	0.0344579	3.01961	0.500795	4.02441	0.449366	37.0196	1301.54	1.06885	1.51587	3.01961	0.595617	0.165483	0.489153	7.63e-07	3	333	o
389	291	62	9.89072	3.27905	5.07386	15.6958	1380.95	748.076	32.5878	0.922191	-0.475737	0.0184874	2.93643	0.844154	10.4209	0.488388	32.4393	1002.81	1.32558	1.81961	2.93643	0.614875	0.265267	0.653286	0.0145721	8.34599	0.565615	10.6067	0.315825	32.1435	981.979	1.29061	1.92548	8.34599	0.800031	0.139063	0.500067	7.09e-07	5	1439	o
390	236	59	8.97311	3.16426	3.11851	13.6181	556.936	746.837	29.4406	0.91946	0.450088	0.0312994	2.09631	0.755365	5.28458	0.533671	35.5684	1197.48	1.18176	1.61049	2.09631	0.553936	0.241982	0.59843	0.0226389	5.53333	0.338641	5.1833	0.364519	35.2111	1173.11	1.12428	1.73442	5.53333	0.719001	0.0886347	0.385471	8.61e-07	6	1441	o
391	115	40	5.95529	1.70243	3.3595	9.32664	1036.74	744.756	17.9097	0.870974	-0.348139	0.0706908	1.24936	0.604243	2.57844	0.640617	39.1517	1467.14	0.914512	1.23006	1.24936	0.479027	0.166367	0.447272	0.0699666	2.74699	0.127122	2.57352	0.493976	39.0843	1464.99	0.855558	1.21286	2.74699	0.587511	0.0276386	0.182812	1e-06	7	596	o
392	57	23	3.91098	0.883079	2.32436	5.2306	1092.64	744.266	11.5157	0.821776	1.05006	0.0712053	1.18919	0.568719	2.37867	0.619459	39.5135	1495.84	0.893422	1.2052	1.18919	0.451254	0.142101	0.41032	0.0795848	2.58824	0.0822086	2.41003	0.447059	39.6471	1510.02	0.827372	1.18946	2.58824	0.545252	0.0838413	0.314413	9.95e-07	4	129	o
393	243	74	8.99113	3.30858	3.25027	15.1433	980.572	748.335	27.8554	0.880442	-0.071071	0.034742	2.02962	0.78346	5.68649	0.553826	35.4277	1190.06	1.17363	1.59466	2.02962	0.556969	0.237722	0.5913	0.0331229	5.17949	0.45672	5.76686	0.414539	35.3846	1188.49	1.11218	1.62514	5.17949	0.724407	0.116165	0.426167	1e-06	7	965	o
394	295	63	10.0987	3.42905	4.48151	15.0472	580.002	754.181	33.5018	0.928292	-0.820161	0.0409727	1.47142	0.8151	4.97896	0.638906	36.0412	1231.28	1.15801	1.5237	1.47142	0.505722	0.283962	0.629328	0.0308444	3.34177	0.569267	4.87917	0.491998	35.789	1213.31	1.13165	1.62185	3.34177	0.650933	0.132059	0.452688	9.01e-07	6	1441	o
395	366	71	11.4362	3.97254	4.75268	18.3502	373.81	754.598	37.8295	0.927302	0.641371	0.0328615	1.78202	0.833919	6.36492	0.589778	34.2809	1113.38	1.20972	1.60417	1.78202	0.536881	0.289415	0.64722	0.0258889	4.75667	0.536566	6.13197	0.439134	33.89	1086.55	1.1673	1.70447	4.75667	0.706605	0.122549	0.446652	6.94e-07	1	531	o
396	410	83	12.2791	4.82773	4.4857	20.6669	681.333	752.654	42.5706	0.954142	0.309456	0.0815674	0.660214	0.823403	2.86927	0.758812	38.6842	1428.56	0.978282	1.19978	0.660214	0.385459	0.34492	0.627305	0.0529504	1.57759	0.59679	2.95628	0.610801	38.7328	1432.23	0.970573	1.34756	1.57759	0.514163	0.174872	0.477056	1e-06	4	1845	o
397	324	70	9.73729	2.53292	3.96026	15.208	24.2669	759.655	27.3699	0.790086	-1.57007	0.0531842	1.08773	0.799222	3.7088	0.65942	37.8032	1358.87	1.07288	1.39857	1.08773	0.451371	0.271067	0.595839	0.039026	3.10821	0.457392	3.86414	0.486298	37.5784	1343.24	1.0422	1.52938	3.10821	0.619841	0.104271	0.39351	3.26e-07	2	1316	o
398	282	60	9.36621	2.12013	6.20181	13.7026	787.613	757.371	26.401	0.820077	-0.706012	0.0324173	1.72852	0.824171	5.91534	0.585811	35.5684	1199.24	1.19825	1.58847	1.72852	0.531144	0.27916	0.634604	0.0224989	5.02553	0.527858	6.32205	0.422489	35.434	1190.03	1.17369	1.74296	5.02553	0.723252	0.120383	0.447318	1.03e-06	4	461	o
399	766	102	15.461	3.09371	9.87139	22.1446	612.01	762.714	40.339	0.733511	-0.212986	0.0391538	1.3876	0.871867	6.41467	0.65914	33.3807	1053.86	1.23124	1.57104	1.3876	0.492907	0.351658	0.698901	0.0297723	3.26519	0.678791	6.08265	0.530977	33.0756	1033.34	1.19649	1.69961	3.26519	0.635128	0.190504	0.548486	9.53e-07	6	945	o
400	425	68	11.7938	2.83968	6.74564	16.9021	1160.82	761.854	34.029	0.853477	-0.925474	0.0533948	1.52061	0.882107	7.44911	0.618106	33.5916	1074.13	1.19017	1.52893	1.52061	0.51572	0.34801	0.689133	0.0475417	4.14481	0.664252	7.1725	0.477193	33.3525	1056.92	1.15961	1.62185	4.14481	0.695227	0.180353	0.524344	9.86e-07	3	1025	o
401	516	88	12.729	3.40931	5.76602	19.0041	650.778	765.28	34.2163	0.660398	0.52494	0.0470408	1.27929	0.873221	6.04535	0.653949	34.2207	1110.78	1.17715	1.49587	1.27929	0.487056	0.349847	0.685332	0.035104	3.46347	0.654229	6.00832	0.50172	33.8699	1087.39	1.14644	1.6254	3.46347	0.654361	0.161804	0.498846	9.95e-07	9	1845	o
402	187	43	7.33325	1.19379	4.70113	9.39733	1061.47	756.435	18.8611	0.690398	0.0202148	0.0414536	1.25672	0.802413	4.18015	0.620386	37.8597	1362.32	1.10575	1.4478	1.25672	0.458408	0.282313	0.61537	0.0373181	3.14094	0.507097	4.18616	0.467472	37.6242	1347.58	1.04577	1.50446	3.14094	0.620391	0.133516	0.440058	1.01e-06	5	300	o
403	260	66	10.0904	3.9924	2.62895	16.6716	811.069	760.762	34.8635	0.945833	-0.642482	0.0515784	1.28742	0.720615	3.30402	0.630946	37.7191	1353.01	1.04369	1.39123	1.28742	0.474014	0.224588	0.544707	0.0350088	3.13366	0.362384	3.45733	0.478412	37.599	1345.48	1.00959	1.53276	3.13366	0.629404	0.0634968	0.309241	1.03e-06	4	436	o
404	497	100	14.2567	6.36599	4.02505	24.8331	244.589	764.194	53.4131	0.969052	0.284055	0.0446035	1.29994	0.804339	4.32194	0.625271	36.2697	1247.21	1.12395	1.45955	1.29994	0.48131	0.285609	0.62057	0.0322579	3.56436	0.448396	4.2309	0.466556	35.9158	1222.95	1.07919	1.58967	3.56436	0.655132	0.0907521	0.374511	6.32e-07	2	745	o
405	142	42	6.66442	2.08845	3.69815	10.2961	538.535	759.786	21.4252	0.905178	-0.406114	0.0313805	2.07302	0.713941	4.62341	0.510583	35.7201	1209.22	1.1253	1.561	2.07302	0.53508	0.203212	0.545423	0.0313932	4.70408	0.237702	4.08546	0.388452	35.0714	1167.64	1.0126	1.56799	4.70408	0.688916	0.0535785	0.28758	8.55e-07	7	237	o
406	430	80	12.0021	4.05036	5.76678	19.1005	740.335	763.688	39.1553	0.919024	0.240028	0.0427375	1.33986	0.833892	5.0331	0.655676	34.8547	1149.81	1.16474	1.50022	1.33986	0.497534	0.323276	0.662765	0.0307627	3.48677	0.571382	5.06746	0.514446	35	1159.49	1.13689	1.64111	3.48677	0.66086	0.159028	0.496868	1.03e-06	4	669	o
407	272	52	8.89901	1.25191	5.80534	10.925	1045.53	767.608	22.7491	0.658907	1.27376	0.0336966	2.6402	0.837487	9.12305	0.53163	32.3045	994.153	1.25133	1.68435	2.6402	0.608286	0.282093	0.651823	0.0353751	7.30342	0.54777	9.07489	0.428988	32.2607	989.404	1.20577	1.68467	7.30342	0.791956	0.150208	0.489248	1.02e-06	6	382	o
408	445	98	14.5487	6.92038	3.95683	26.3436	1304.95	770.276	53.9409	0.977494	-0.500517	0.0309072	1.80822	0.854126	7.19789	0.58943	35.3064	1184.15	1.23049	1.64586	1.80822	0.537228	0.287972	0.652052	0.0203378	4.90685	0.60308	7.18116	0.410578	35.2795	1180.44	1.21155	1.80153	4.90685	0.705838	0.121202	0.455411	8.57e-07	4	1187	o
409	306	63	9.70716	2.83684	5.67167	14.3004	113.326	774.999	29.7473	0.894288	-1.53609	0.108019	0.68308	0.670431	2.03632	0.735684	39.7198	1512.18	0.877624	1.105	0.68308	0.380054	0.220096	0.489	0.0771378	1.61887	0.249359	2.07832	0.591987	39.7623	1519.18	0.820235	1.22339	1.61887	0.515639	0.057305	0.263878	4.74e-07	2	438	o
410	179	45	7.34469	1.8144	4.08073	10.6253	944.45	772.351	20.9585	0.826145	-0.326283	0.088437	0.677165	0.72681	2.23937	0.725669	39.9969	1532.23	0.907847	1.12696	0.677165	0.375505	0.266733	0.541381	0.0612287	1.64029	0.376436	2.31525	0.551079	39.9281	1528.55	0.877772	1.27236	1.64029	0.491957	0.0686783	0.294139	1.02e-06	5	374	o
411	73	30	4.48461	1.03733	2.20126	6.19507	837.275	771.767	12.5956	0.758502	-1.0771	0.0484075	1.66667	0.666345	3.49759	0.575006	38.73	1430.33	1.02049	1.4235	1.66667	0.498113	0.18099	0.496676	0.041907	3.56863	0.308036	3.57862	0.444646	38.8627	1441.48	0.984896	1.45066	3.56863	0.613007	0.146529	0.452729	1.03e-06	4	320	o
412	397	76	12.2245	4.61385	4.9481	20.0068	311.2	782.804	40.8502	0.944183	0.583491	0.0534209	1.03722	0.822833	3.92723	0.666644	36.7877	1285.79	1.07894	1.37467	1.03722	0.446345	0.310058	0.629404	0.0376687	2.81627	0.544365	4.09049	0.506211	36.6536	1276.97	1.05272	1.51777	2.81627	0.613445	0.118989	0.417985	6.73e-07	2	612	o
413	224	66	9.19457	3.55452	3.48475	15.6474	21.9864	785.675	31.7132	0.948661	-1.30675	0.0833517	0.977011	0.714767	2.71266	0.672233	38.4074	1408.76	0.95234	1.22871	0.977011	0.430573	0.234051	0.527233	0.0633833	2.33526	0.344795	2.78208	0.517443	38.1272	1389.1	0.920933	1.32509	2.33526	0.570906	0.0694413	0.301535	3.08e-07	2	1316	o
414	386	65	10.6581	1.10963	8.47652	13.4074	179.143	782.51	25.6306	0.535156	1.14749	0.0364711	2.55346	0.836578	8.81247	0.557289	30.0615	858.531	1.25465	1.66295	2.55346	0.60586	0.295726	0.662179	0.0299742	7.38066	0.515932	8.62358	0.406047	29.5196	825.195	1.19859	1.74546	7.38066	0.788076	0.141826	0.483634	5.64e-07	4	870	o
415	267	78	10.5702	4.9619	3.05873	19.4731	541.185	780.025	41.2878	0.97734	0.131026	0.0690326	1.02662	0.659117	2.50583	0.643876	38.4281	1410.12	0.943127	1.2377	1.02662	0.427422	0.212761	0.505206	0.0660965	2.58911	0.140737	2.50659	0.540274	38.4703	1418.41	0.854189	1.30387	2.58911	0.603742	0.036058	0.216218	8.79e-07	6	1165	o
416	251	58	9.31065	3.28983	4.18195	14.8279	1140.24	787.804	30.9127	0.934864	-1.08788	0.0504963	1.39667	0.753981	3.83853	0.608176	36.9233	1295.09	1.07461	1.42403	1.39667	0.488393	0.242309	0.569839	0.0369507	3.62755	0.34992	3.79008	0.440745	36.7092	1280.7	1.02769	1.5516	3.62755	0.649151	0.0680099	0.321689	9.93e-07	5	1025	o
417	103	35	5.44078	1.53793	2.99114	7.9213	831.883	783.777	16.4942	0.87152	-1.30507	0.136735	0.748571	0.679519	2.16789	0.718286	39.84	1524.49	0.845592	1.08353	0.748571	0.392209	0.241386	0.507237	0.11602	1.35714	0.294467	1.96179	0.647143	39.9	1535.05	0.752123	1.0894	1.35714	0.497079	0.165177	0.422025	1.03e-06	5	320	o
418	191	71	6.84003	2.49679	0.946286	11.1517	1282.6	788.604	20.8065	0.726222	0.0619357	0.0409107	1.91602	0.684476	4.03625	0.571128	38.3919	1402.93	1.073	1.48829	1.91602	0.551217	0.174979	0.498275	0.0325332	3.96479	0.312739	3.88448	0.415681	38.5282	1414.41	1.02036	1.56411	3.96479	0.658502	0.0536847	0.287519	8.82e-07	6	1187	o
419	321	70	10.1518	3.55824	2.09981	15.2506	1320	787.389	34.1231	0.90525	-0.487062	0.0241702	2.01981	0.854569	7.94423	0.563214	35.1016	1170.75	1.26389	1.70257	2.01981	0.551334	0.279955	0.652289	0.017639	5.26772	0.602548	7.62685	0.401474	34.6614	1139.21	1.22539	1.81884	5.26772	0.723978	0.1477	0.501782	8.23e-07	4	570	o
420	169	47	7.15602	1.68532	3.29959	10.5596	198.116	784.64	20.0391	0.802341	0.474766	0.0315186	2.91231	0.761783	7.11272	0.515001	33.371	1056.01	1.20779	1.67908	2.91231	0.62838	0.221234	0.584312	0.0287541	7.25397	0.411076	7.15867	0.361287	32.873	1022.31	1.17241	1.69591	7.25397	0.782977	0.140207	0.475004	5.85e-07	4	870	o
421	147	46	6.65946	1.96612	3.80832	10.0251	444.765	785.683	20.5774	0.881461	0.699184	0.220972	0.419483	0.468693	1.39477	0.806958	41.2982	1657.15	0.604288	0.742742	0.419483	0.313795	0.143601	0.329474	0.185743	0.721154	0.0682673	1.387	0.697115	41.2596	1657.61	0.556001	0.783698	0.721154	0.367738	0.018233	0.119654	7.68e-07	5	634	o
422	145	54	7.13693	2.80214	2.94538	12.1201	570.099	782	25.1984	0.94389	-0.00309991	0.0238645	3.53988	0.667307	6.32004	0.447228	33.998	1093.58	1.1979	1.68523	3.53988	0.647428	0.194578	0.551893	0.0299501	11.9008	0.145053	7.95998	0.391477	34.8099	1149.08	1.1477	1.60716	11.9008	0.812887	0.148788	0.47715	9.2e-07	6	1165	o
423	379	83	11.8994	4.65176	4.86265	19.6127	1233.2	787.866	41.5303	0.953569	-0.263237	0.0353971	1.38272	0.836158	5.21967	0.593507	36.2977	1248.62	1.18194	1.54923	1.38272	0.476562	0.298737	0.647785	0.0268957	3.95364	0.509552	5.03065	0.426759	35.9007	1220.91	1.13366	1.69787	3.95364	0.665872	0.108214	0.420169	9.36e-07	4	569	o
424	85	32	4.76438	1.44119	1.87213	6.85145	642.249	785.945	14.5135	0.820899	0.35697	0.207529	0.492908	0.365292	1.38829	0.770567	41.6631	1685.87	0.616678	0.778537	0.492908	0.326249	0.0785463	0.248329	0.21542	0.698413	0.0735294	1.37692	0.726984	42.127	1728.51	0.561309	0.794416	0.698413	0.384089	0.0187658	0.122215	1.01e-06	6	1845	o
425	124	38	5.90947	1.60133	3.46989	8.53711	625.392	785.546	17.9471	0.86269	0.108273	0.0852163	0.974419	0.578756	2.1566	0.674651	39.1419	1467.63	0.879839	1.17953	0.974419	0.433651	0.149198	0.416151	0.0839711	1.75	0.103626	1.97616	0.539286	39.0119	1464.63	0.769534	1.15441	1.75	0.50403	0.0332524	0.195663	9.92e-07	7	1845	o
426	263	69	9.66992	3.98651	3.75407	16.2924	985.453	788.202	35.68	0.953137	-0.174626	0.0328073	1.74011	0.789321	5.12976	0.563441	36.9572	1296.39	1.15761	1.55471	1.74011	0.521719	0.249408	0.598242	0.0257704	4.2878	0.461591	4.98192	0.41521	36.8634	1290.29	1.10518	1.65071	4.2878	0.680367	0.0962547	0.39209	1.03e-06	5	972	o
427	47	20	3.41447	0.341206	2.76134	3.99061	738.776	791.061	8.39178	0.501321	-0.122944	0.131617	0.615894	0.532842	1.65919	0.715894	40.5629	1587.82	0.740832	0.94164	0.615894	0.335496	0.166739	0.396764	0.154064	1.04348	-0.131148	1.46125	0.634783	40.2609	1577.52	0.552998	0.857492	1.04348	0.422325	0.0367279	0.17769	1.05e-06	2	890	o
428	221	53	8.75316	3.11925	4.20149	13.5692	1413.2	796.872	29.5678	0.938719	-0.568584	0.0361497	1.51588	0.804252	4.87203	0.592171	36.9517	1296.71	1.13633	1.51441	1.51588	0.497317	0.253955	0.596912	0.0282449	4.12571	0.446683	4.72816	0.411553	36.9143	1293.89	1.09393	1.61583	4.12571	0.665699	0.0926677	0.381188	5.92e-07	3	1926	o
429	102	37	5.57102	1.61064	2.86958	8.48158	211.017	796.074	17.3932	0.872002	0.646235	0.0167593	4.50737	0.663291	7.69328	0.404677	33.6932	1074.64	1.25282	1.84382	4.50737	0.68744	0.153589	0.513968	0.02158	11.1781	0.205548	8.03509	0.245398	33.5068	1060.53	1.20249	1.73915	11.1781	0.833296	0.090101	0.389018	5.95e-07	6	870	o
430	106	33	5.40787	0.801786	4.23083	6.67355	756.457	795.428	12.4542	0.287652	0.387519	0.0948406	0.637363	0.712746	2.10941	0.727473	40.8132	1598.26	0.882524	1.095	0.637363	0.360245	0.246929	0.515202	0.083044	1.25	0.347826	1.95833	0.608333	40.6667	1592.39	0.794343	1.12419	1.25	0.457353	0.0602163	0.259646	1.05e-06	4	890	o
431	81	32	4.87906	1.7203	1.98849	7.50943	480.242	794.679	16.5659	0.919958	-0.309594	0.0728724	1.43071	0.464222	2.33517	0.590262	38.5543	1423.48	0.877135	1.22039	1.43071	0.483278	0.0993339	0.346065	0.0761246	2.84314	-0.116985	2.27268	0.496078	38.451	1422.8	0.760726	1.15549	2.84314	0.582751	0.0187792	0.147196	8.1e-07	4	634	o
432	690	89	14.6605	1.69564	11.3797	18.063	39.9393	96.1766	35.7001	0.650922	-0.369655	0.0437187	1.12292	0.839133	4.4902	0.660735	34.2389	1107.69	1.15032	1.47381	1.12292	0.461513	0.313754	0.649736	0.0294089	3.3406	0.53808	4.616	0.492666	33.9044	1086.03	1.11856	1.64758	3.3406	0.648171	0.108929	0.415789	1.76e-06	4	4604	c
433	614	89	13.9815	2.90755	8.39257	20.158	360.381	395.93	37.4879	0.796863	-0.904467	0.0819742	0.525446	0.872553	3.06142	0.762853	37.2066	1316.84	1.02479	1.20142	0.525446	0.337246	0.399492	0.671606	0.0546879	1.26481	0.684525	3.00462	0.616481	37.1056	1310	1.00505	1.36135	1.26481	0.466762	0.185371	0.492752	2.01e-06	5	15319	c
434	683	91	14.7867	3.22499	9.74267	20.4439	278.978	333.62	40.59	0.836936	0.401579	0.11999	0.553774	0.753312	2.12242	0.766758	38.1768	1395.01	0.879618	1.07049	0.553774	0.35311	0.28378	0.546017	0.085763	1.20883	0.473217	2.14737	0.648217	38.1222	1392.05	0.857352	1.19747	1.20883	0.474059	0.0989698	0.342379	3.75e-06	12	15319	c
435	656	108	15.2495	4.94859	7.38822	24.4963	637.109	322.292	46.8838	0.908224	0.80816	0.0431687	0.99507	0.853102	4.38694	0.667625	37.4454	1330.06	1.14793	1.45407	0.99507	0.435234	0.324258	0.656008	0.0303069	2.59043	0.617377	4.38508	0.497952	37.25	1316.38	1.1192	1.59746	2.59043	0.589308	0.142031	0.465505	3.4e-06	8	5576	c
436	470	76	11.6917	1.9064	6.52018	14.7215	600.226	275.724	29.6015	0.673994	-1.51526	0.0750031	0.750286	0.793696	2.8184	0.72795	28.8683	783.419	0.995418	1.23106	0.750286	0.397708	0.302656	0.5961	0.053946	1.80494	0.492588	2.77857	0.58398	28.758	778.357	0.954289	1.3597	1.80494	0.537681	0.103941	0.372152	3.04e-06	8	5576	c
437	665	89	14.1392	2.38108	8.17564	18.1213	756.845	171.062	37.4243	0.748763	0.950811	0.0400966	1.21429	0.934993	10.3397	0.665042	33.4561	1073.18	1.25313	1.56768	1.21429	0.481201	0.401271	0.738086	0.0275929	4.00506	0.783823	10.2634	0.501309	33.118	1048.55	1.25117	1.73988	4.00506	0.684555	0.220389	0.591693	3.1e-06	9	731	c
438	496	83	12.5926	3.57931	5.98893	19.1302	185.174	26.0954	38.1509	0.874212	-1.41405	0.0441598	0.969039	0.870576	4.74365	0.675177	35.2146	1174.55	1.14775	1.44007	0.969039	0.434289	0.347015	0.673592	0.0278124	2.83255	0.633997	4.86957	0.498018	34.8892	1152.29	1.13048	1.61918	2.83255	0.61279	0.14854	0.478331	7.35e-07	5	14597	c
439	508	94	13.4547	5.36689	4.23111	22.9214	342.156	39.1267	47.4557	0.950888	-0.1584	0.156023	0.395075	0.75549	1.80789	0.81531	32.166	988.131	0.776546	0.905365	0.395075	0.30547	0.33809	0.5551	0.129385	0.876812	0.41603	1.75073	0.718116	31.872	971.777	0.732757	0.989418	0.876812	0.429514	0.0940425	0.304997	1.12e-06	3	14597	c
440	770	93	15.2454	1.62684	11.0222	18.3618	109.115	65.268	33.4301	0.244945	-0.696137	0.0420115	0.960589	0.89703	5.66443	0.675009	33.4575	1058.11	1.202	1.48961	0.960589	0.431543	0.382742	0.711284	0.0281767	2.85373	0.671779	5.34727	0.501771	32.8955	1020.83	1.17334	1.67264	2.85373	0.614474	0.158128	0.499637	9.94e-07	6	912	c
441	750	87	15.1923	2.01712	11.0947	18.5057	266.328	85.6193	37.7927	0.708696	0.519971	0.0852397	0.432186	0.900598	3.17393	0.798665	36.6493	1276.77	1.03318	1.1742	0.432186	0.315227	0.477507	0.721963	0.0536624	1.1	0.754743	3.24254	0.650969	36.4794	1263.56	1.04372	1.34752	1.1	0.452025	0.26139	0.577188	1.1e-06	5	10617	c
442	553	78	13.0501	2.31804	8.18784	16.7505	240.681	108.307	33.9195	0.755533	0.457867	0.086773	0.737808	0.838459	3.28366	0.741767	35.3085	1184.02	1.0212	1.24736	0.737808	0.40111	0.350432	0.641388	0.0655346	1.77847	0.584783	3.14162	0.608965	35.0538	1166.85	0.994077	1.38198	1.77847	0.53916	0.138255	0.430766	9.95e-07	4	10617	c
443	436	68	11.3998	1.33102	9.03631	14.6792	284.603	114.421	27.9059	0.641771	1.27969	0.0413201	0.953846	0.883269	5.08567	0.668554	33.4092	1053.84	1.18418	1.47294	0.953846	0.426164	0.36854	0.697111	0.0274098	2.86133	0.647191	5.05508	0.477682	33.032	1029.44	1.15603	1.64433	2.86133	0.598895	0.160938	0.500084	1.21e-06	7	10617	c
444	557	96	14.4654	5.51375	3.71336	24.0684	271.616	133.055	46.2906	0.926735	0.986399	0.12067	0.406524	0.843359	2.29763	0.808423	31.8905	965.753	0.890951	1.02436	0.406524	0.30746	0.407376	0.638653	0.0858271	0.900634	0.668259	2.35744	0.684144	31.7252	955.265	0.891157	1.16117	0.900634	0.421437	0.206251	0.484098	1.15e-06	8	10617	c
445	755	103	14.8883	3.71058	5.21189	20.391	448.014	137.012	41.1964	0.782334	-0.777098	0.0728688	0.567606	0.904081	3.95876	0.758873	36.1641	1243.48	1.06116	1.24782	0.567606	0.354103	0.438927	0.71011	0.0508336	1.56018	0.729937	3.88855	0.603059	35.9941	1230.73	1.05504	1.41179	1.56018	0.514776	0.215969	0.53807	1.49e-06	5	5829	c
446	176	69	7.70826	2.51775	3.0116	12.7073	291.157	145.789	20.3284	0.70185	0.154557	0.340141	0.30137	0.488881	1.29481	0.849315	33.9247	1114.56	0.55275	0.643471	0.30137	0.265797	0.172093	0.337801	0.269966	0.572581	0.0851561	1.31294	0.762097	33.7661	1105.61	0.525617	0.722734	0.572581	0.358006	0.0111431	0.0898106	1.24e-06	8	10617	c
447	649	85	14.2905	2.34706	9.97537	18.514	396.482	149.642	36.7484	0.746471	-0.681711	0.0531172	0.748976	0.91346	5.32736	0.72859	35.1077	1169.66	1.15039	1.38384	0.748976	0.398392	0.421439	0.722747	0.0350548	2.05236	0.765515	5.3763	0.564425	34.8202	1148.84	1.1544	1.56396	2.05236	0.561141	0.221863	0.568447	1.41e-06	4	10617	c
448	758	137	18.3975	6.64167	7.98195	33.1671	490.166	155.591	56.8756	0.935215	-0.386144	0.0659069	0.645057	0.909846	4.57753	0.753976	36.4216	1261.98	1.09003	1.29688	0.645057	0.380041	0.430461	0.713461	0.0432077	1.88992	0.735998	4.57936	0.590465	36.2589	1249.45	1.0876	1.47183	1.88992	0.551635	0.210461	0.540947	1.65e-06	9	5829	c
449	465	66	11.7998	0.954663	9.94324	14.0115	372.166	169.052	26.4719	0.474275	-0.214826	0.153619	0.374353	0.788207	1.88377	0.824554	32.3479	996.46	0.831255	0.956776	0.374353	0.299136	0.368537	0.592418	0.1067	0.871605	0.533624	1.93444	0.697182	32.2444	989.767	0.829462	1.09898	0.871605	0.414574	0.15378	0.409019	1.35e-06	6	10617	c
450	798	114	17.35	5.38629	8.19443	27.9622	450.982	177.079	52.9025	0.918201	-0.675084	0.0588263	1.18176	0.818875	4.26227	0.675176	33.6432	1071.2	1.09584	1.3995	1.18176	0.474127	0.304199	0.628281	0.0380558	3.23446	0.534978	4.47775	0.521989	33.4972	1061.33	1.08336	1.57342	3.23446	0.647446	0.11287	0.414201	1.53e-06	7	5829	c
451	700	98	14.5617	3.11981	6.97083	19.0804	294.244	185.461	37.6423	0.706496	0.708308	0.135205	0.359375	0.855565	2.24407	0.831745	30.0682	855.718	0.894583	1.01176	0.359375	0.294419	0.440277	0.65966	0.0953352	0.808581	0.660485	2.19079	0.70264	29.8746	843.736	0.895607	1.13859	0.808581	0.405413	0.206017	0.479697	1.23e-06	7	10617	c
452	651	94	14.5567	3.58779	8.92799	22.1649	470.555	197.795	41.2282	0.858605	-0.416401	0.0643174	0.865164	0.795687	3.11725	0.70845	35.766	1213.45	1.04074	1.30445	0.865164	0.423541	0.30456	0.611679	0.0434065	2.19716	0.496182	3.18051	0.558589	35.5471	1199.41	1.00891	1.45998	2.19716	0.578377	0.105579	0.387534	1.61e-06	7	9899	c
453	521	93	13.3535	4.22733	7.23834	21.6667	492.599	216.337	40.4778	0.900127	-0.534507	0.0459728	1.07206	0.826345	4.08676	0.661911	35.8042	1214.22	1.12061	1.44022	1.07206	0.451	0.296978	0.62838	0.0304612	3.05405	0.535237	4.2856	0.496388	35.5631	1197.72	1.1011	1.61784	3.05405	0.631568	0.10588	0.406765	1.72e-06	11	9899	c
454	532	92	13.5349	4.17956	7.27194	22.0939	578.707	236.334	40.4355	0.889587	-0.480957	0.162672	0.449695	0.687062	1.71851	0.804421	33.7769	1093.53	0.744972	0.897328	0.449695	0.326881	0.260555	0.485513	0.130391	0.917411	0.367665	1.72542	0.693973	33.5826	1081.41	0.727934	0.984198	0.917411	0.431358	0.0692762	0.261135	1.96e-06	12	9899	c
455	475	88	12.5471	4.00734	5.15895	18.9281	502.018	257.423	39.7502	0.909808	-0.472428	0.0812519	0.667049	0.793072	2.61179	0.729162	37.8542	1366.13	0.971301	1.19633	0.667049	0.374424	0.304593	0.591101	0.0576627	1.64824	0.507782	2.6743	0.58185	37.809	1364.13	0.94327	1.34567	1.64824	0.515322	0.105782	0.373561	1.63e-06	9	659	c
456	606	102	14.9562	4.81681	7.65903	24.0782	574.839	269.076	46.3588	0.922512	-0.484117	0.0982308	0.447263	0.887632	2.99017	0.805741	38.4437	1412.48	0.960825	1.112	0.447263	0.326074	0.428851	0.67457	0.070916	1.03468	0.741616	3.00222	0.692792	38.183	1392.61	0.958911	1.24401	1.03468	0.454161	0.238942	0.53526	1.97e-06	12	9899	c
457	610	101	14.5309	4.15676	7.66699	22.7339	576.675	304.566	42.9874	0.884656	-0.384957	0.0588939	0.858093	0.83744	3.63931	0.717107	36.5308	1266.7	1.07664	1.33979	0.858093	0.423276	0.334617	0.645225	0.0376975	2.1654	0.604357	3.73655	0.563785	36.3707	1255.6	1.06037	1.4916	2.1654	0.574411	0.143985	0.454534	1.89e-06	9	5723	c
458	781	127	18.9177	8.45968	4.62891	34.0238	216.72	327.193	70.1106	0.974903	-1.02093	0.0467847	1.01387	0.877962	5.15391	0.68755	34.4563	1124.33	1.1587	1.44907	1.01387	0.44929	0.351986	0.679346	0.0302575	2.71032	0.672609	5.13927	0.539131	34.0262	1094.66	1.15052	1.62435	2.71032	0.611519	0.161549	0.498338	1.75e-06	9	7144	c
459	253	58	8.56462	1.74365	4.82666	12.2131	534.708	426.961	22.7607	0.74373	-1.26766	0.167697	0.354555	0.745255	1.6959	0.827991	29.6718	838.975	0.748682	0.861967	0.354555	0.288991	0.32996	0.537273	0.149801	0.618812	0.48826	1.60462	0.738119	29.4307	826.69	0.709787	0.910509	0.618812	0.361143	0.125096	0.338245	1.08e-06	5	11222	c
460	610	84	13.6686	1.53375	8.86118	16.3524	554.446	438.071	29.8717	0.311603	1.46526	0.071994	0.60642	0.918739	4.73131	0.771724	26.6961	669.872	1.09236	1.29596	0.60642	0.372427	0.44548	0.724021	0.0440762	1.61243	0.795944	4.95094	0.627181	26.6216	664.871	1.11315	1.4783	1.61243	0.522735	0.265469	0.603297	1.25e-06	5	11222	c
461	570	99	14.7727	5.15485	5.8459	24.5584	366.083	465.172	46.0206	0.925035	-0.433296	0.156576	0.442857	0.697554	1.73212	0.802	32.0695	980.726	0.792695	0.945411	0.442857	0.322819	0.272413	0.507752	0.116105	0.985507	0.310041	1.71418	0.680867	32.0207	979.884	0.74751	1.05462	0.985507	0.440091	0.0527448	0.23565	1.36e-06	1	3914	c
462	773	117	16.6402	5.1908	7.48644	24.8258	333.459	497.307	50.8666	0.89667	-0.610829	0.0603763	0.819285	0.886055	4.59508	0.712583	34.2019	1107.99	1.11976	1.3736	0.819285	0.41246	0.377669	0.687358	0.0391187	2.15892	0.688559	4.46602	0.546358	33.8861	1086.44	1.10286	1.53955	2.15892	0.564361	0.173834	0.504037	1.62e-06	3	3914	c
463	722	105	15.4855	5.11981	7.63418	24.0546	633.591	487.373	49.6892	0.922292	-0.115798	0.0624148	0.929256	0.785091	3.16197	0.696992	35.4525	1191.47	1.04682	1.3352	0.929256	0.433386	0.278429	0.592211	0.0426162	2.44068	0.460876	3.26356	0.54144	35.4915	1195.39	1.01288	1.49187	2.44068	0.58797	0.090065	0.362286	1.59e-06	6	11258	c
464	725	94	15.4273	3.62957	9.26818	21.2113	459.896	566.185	44.2766	0.853871	-0.788528	0.0359868	0.988653	0.910895	6.54767	0.67677	34.8745	1153.32	1.22744	1.52343	0.988653	0.438981	0.39012	0.722561	0.0226176	2.86929	0.735732	6.42876	0.503052	34.6236	1134.87	1.21668	1.7148	2.86929	0.615752	0.193131	0.553985	1.41e-06	8	12738	c
465	737	125	15.5988	4.35957	6.67885	23.5214	618.811	600.033	46.3429	0.875479	0.223778	0.0584401	0.853016	0.824339	3.42802	0.700241	34.6556	1136.97	1.06828	1.34059	0.853016	0.414087	0.313226	0.626245	0.0398414	2.19589	0.552893	3.45567	0.544157	34.6288	1135.98	1.03779	1.49868	2.19589	0.566762	0.117065	0.412331	1.51e-06	6	11258	c
466	129	47	6.70727	2.76488	0.992502	11.3983	509.464	638.059	24.266	0.939433	-1.0031	0.150133	0.548611	0.545299	1.60327	0.747917	32.8866	1035.13	0.742052	0.921198	0.548611	0.335272	0.168565	0.394938	0.114966	1.16456	0.125602	1.66592	0.64557	32.7595	1029.74	0.693328	1.02737	1.16456	0.454957	0.0332886	0.18488	1.63e-06	12	12738	c
467	530	80	12.9474	3.44269	6.92193	19.0778	616.135	656.351	37.8068	0.869818	-0.229656	0.0817636	0.965152	0.707615	2.65048	0.715318	35.454	1194.51	0.973974	1.26588	0.965152	0.44318	0.243	0.543525	0.0596426	1.94505	0.361112	2.52222	0.571235	35.3648	1191.03	0.913611	1.3558	1.94505	0.55107	0.0597654	0.283077	1.59e-06	4	612	c
468	700	94	14.8535	2.59694	10.8584	20.6107	686.464	684.475	38.8072	0.77116	0.84843	0.0587832	0.904328	0.89683	5.38271	0.716347	32.7046	1012.55	1.14634	1.41782	0.904328	0.434629	0.396179	0.709679	0.0394209	2.31656	0.721746	5.16266	0.577175	32.5179	999.761	1.12634	1.5603	2.31656	0.587898	0.212145	0.556295	1.12e-06	4	11258	c
469	475	87	12.3312	2.37379	7.8555	17.3214	702.431	713.562	27.6662	0.38855	0.600652	0.0887578	0.620275	0.769381	2.3448	0.747595	36.6844	1283.35	0.92699	1.13413	0.620275	0.366847	0.300628	0.574916	0.0668522	1.45209	0.431092	2.27621	0.618225	36.6118	1280.56	0.877949	1.26041	1.45209	0.503349	0.0906968	0.335937	9.45e-07	3	11258	c
470	603	88	13.4756	2.56768	8.54911	17.5925	702.734	742.258	35.9117	0.730739	-0.00684072	0.0755764	1.40548	0.880751	6.89304	0.659712	32.1272	982.098	1.14446	1.44776	1.40548	0.507758	0.356015	0.682518	0.0562968	4.09793	0.636569	6.63784	0.525098	31.8682	963.708	1.12318	1.56955	4.09793	0.686297	0.169549	0.502303	9.13e-07	4	616	c
471	772	91	15.5019	2.47671	10.1471	21.048	669.863	756.091	39.5104	0.709141	-0.670144	0.0283439	1.63124	0.898411	9.0286	0.608321	32.2738	989.622	1.30379	1.67461	1.63124	0.524899	0.353391	0.716006	0.0206066	4.58027	0.676527	8.07982	0.458436	31.6672	947.962	1.26612	1.8122	4.58027	0.704169	0.167741	0.53139	1.19e-06	5	746	c
472	226	48	8.01691	1.01973	6.09488	9.62536	631.597	755.1	19.7991	0.647043	-0.199195	0.109306	0.498778	0.78355	2.15218	0.781418	32.9902	1035.14	0.880526	1.05059	0.498778	0.337701	0.323108	0.577002	0.0867875	0.951613	0.562728	2.08812	0.685484	32.9516	1034.99	0.833247	1.09501	0.951613	0.435836	0.153391	0.407836	1.41e-06	9	3972	c
473	398	70	10.8771	2.42045	6.13674	15.0638	512.597	16.0553	30.7463	0.814464	0.587075	0.0610978	1.7362	0.810233	5.57456	0.628913	34.1534	1107.62	1.12218	1.48103	1.7362	0.540286	0.270794	0.609219	0.053366	4.61194	0.47573	5.39844	0.497923	33.7104	1078.36	1.07028	1.56815	4.61194	0.704516	0.110104	0.408653	1.25e-06	5	1746	c
474	507	84	12.6071	3.09044	7.58591	18.1311	14.4042	24.7186	36.2247	0.847354	-1.56698	0.0655847	0.703507	0.86896	3.68433	0.737363	37.0988	1307.58	1.07732	1.29445	0.703507	0.389352	0.397274	0.688196	0.0442374	1.72791	0.673342	3.64483	0.583707	36.6628	1276.01	1.06563	1.45268	1.72791	0.526441	0.199347	0.524447	8.96e-07	4	753	c
475	295	57	9.34336	1.38155	7.302	12.2733	550.121	23.9765	23.4823	0.695713	0.91477	0.098834	0.897317	0.696026	2.47598	0.709822	38.8104	1441.43	0.910131	1.16394	0.897317	0.429799	0.231486	0.512501	0.0839096	1.83264	0.328031	2.36363	0.604086	38.5941	1428.2	0.850525	1.20105	1.83264	0.539653	0.06171	0.27134	1.25e-06	4	338	c
476	529	78	12.6039	1.7564	10.0207	16.3254	496.715	30.1423	31.5799	0.69853	0.986643	0.0476248	1.33317	0.807808	4.46832	0.663091	35.7633	1212.01	1.12989	1.46935	1.33317	0.495372	0.290808	0.627272	0.0319937	3.51681	0.525808	4.70821	0.501515	35.6975	1208.73	1.09387	1.63594	3.51681	0.652352	0.128857	0.449154	1.49e-06	5	1746	c
477	391	76	10.9884	3.03777	4.77677	16.4053	394.499	42.9424	32.5105	0.845747	-0.989626	0.0498795	1.07048	0.822534	4.01602	0.649826	38.0921	1380.16	1.08981	1.39369	1.07048	0.444258	0.299955	0.62328	0.038556	3.03448	0.501823	4.04559	0.483828	37.8245	1360.63	1.06193	1.52266	3.03448	0.621878	0.10037	0.385521	1.52e-06	4	490	c
478	438	78	11.6339	2.92483	4.49313	17.8637	351.253	51.4412	32.5799	0.816407	-1.52362	0.0666292	1.18424	0.812241	4.15362	0.669125	35.8902	1224.06	1.06743	1.37465	1.18424	0.473353	0.290011	0.610464	0.0472669	3.03209	0.524455	4.18801	0.497989	35.7326	1213.04	1.04367	1.50028	3.03209	0.627485	0.105361	0.392024	1.52e-06	3	3627	c
479	413	73	11.2009	2.40277	6.90642	16.0351	416.979	51.7837	29.9316	0.776985	-0.474942	0.112544	0.557388	0.782852	2.28343	0.775923	34.3872	1126.27	0.895518	1.08537	0.557388	0.358534	0.308922	0.572154	0.072565	1.22817	0.568675	2.42372	0.642817	34.4451	1129.31	0.906366	1.2314	1.22817	0.470004	0.132068	0.399761	1.7e-06	5	932	c
480	600	92	14.0833	3.88124	8.3046	21.2309	374.183	61.1378	40.9317	0.873783	1.17684	0.0666983	0.979464	0.713598	2.70994	0.67615	38.4241	1407.27	0.988675	1.28604	0.979464	0.436363	0.219334	0.521091	0.0444432	2.59774	0.290242	2.83002	0.511954	38.4286	1409.65	0.946164	1.44253	2.59774	0.598291	0.036889	0.229717	1.73e-06	4	3627	c
481	491	93	12.9218	5.04167	3.40562	20.8215	583.259	56.918	44.8851	0.934129	0.495752	0.0696916	0.695969	0.833576	3.09096	0.727268	40.2637	1548.34	1.01236	1.2426	0.695969	0.38348	0.329072	0.622115	0.047768	1.75124	0.612096	3.25731	0.570289	40.0746	1534.5	0.99498	1.39962	1.75124	0.524875	0.144053	0.441912	1.49e-06	6	616	c
482	785	96	15.5658	2.78384	11.3408	21.0587	179.388	66.1146	40.201	0.770595	-1.29536	0.100582	0.571717	0.781897	2.31066	0.767879	39.6269	1502.35	0.927056	1.12519	0.571717	0.360658	0.312504	0.583789	0.0680882	1.44397	0.45895	2.33441	0.619904	39.4986	1493.86	0.898426	1.27789	1.44397	0.498909	0.09969	0.354227	1.67e-06	5	878	c
483	668	96	14.4366	3.25373	9.31442	21.4031	546.813	64.4802	40.1138	0.814713	0.296862	0.0707973	0.721534	0.867501	3.72279	0.747583	38.1254	1384.56	1.05265	1.2737	0.721534	0.396005	0.381917	0.672221	0.0506474	1.69896	0.678293	3.64054	0.604758	37.8616	1364.61	1.04113	1.42309	1.69896	0.531259	0.181768	0.497627	1.8e-06	7	1309	c
484	137	46	6.313	2.63026	0.633799	10.2771	625.734	67.4509	21.8883	0.890661	0.226716	0.253701	0.420479	0.43877	1.37461	0.797603	36.22	1268.9	0.613589	0.746298	0.420479	0.306938	0.122079	0.304091	0.18533	0.791667	0.004095	1.39746	0.679167	36.1875	1270.12	0.559987	0.81605	0.791667	0.378804	0.0140101	0.106993	1.29e-06	5	1455	c
485	411	67	11.0167	1.21723	8.84878	13.5504	328.092	77.6648	26.6714	0.632087	-1.45952	0.0587681	1.55461	0.759705	4.2348	0.658781	34.7816	1144.85	1.11458	1.45828	1.55461	0.517871	0.27348	0.608248	0.0417413	3.18895	0.430996	3.80222	0.54804	34.2297	1108.7	1.05319	1.5563	3.18895	0.633622	0.112829	0.412073	1.79e-06	7	451	c
486	251	51	8.62359	1.74669	5.69782	11.4863	433.963	86.0666	22.9603	0.754682	-0.499828	0.0784882	0.724479	0.759818	2.50818	0.719429	39.6751	1505.25	0.945958	1.18496	0.724479	0.388832	0.273663	0.559626	0.0573841	1.56436	0.49436	2.54691	0.579499	39.4455	1488.48	0.924717	1.3157	1.56436	0.501559	0.100128	0.359854	2.09e-06	7	303	c
487	465	89	12.6734	3.52467	4.99505	20.626	628.415	96.175	35.0068	0.79623	-0.740267	0.0277227	2.36647	0.897057	12.4941	0.570305	33.1453	1056.26	1.32311	1.73714	2.36647	0.591196	0.33496	0.709141	0.0199142	7.05805	0.676441	11.9069	0.413452	32.1715	988.641	1.31585	1.86542	7.05805	0.78523	0.179574	0.554888	1.53e-06	4	1455	c
488	467	73	11.724	1.50714	8.18891	14.959	570.268	103.682	28.7502	0.625735	1.42175	0.0492062	1.53502	0.817221	5.19911	0.631929	34.5832	1133.75	1.13942	1.49689	1.53502	0.520205	0.2761	0.617169	0.0397	3.9975	0.47763	4.82631	0.51461	34.1725	1106.22	1.08309	1.58606	3.9975	0.687638	0.0998849	0.391906	2.04e-06	5	2957	c
489	117	37	5.78928	1.86405	2.30365	8.43633	343.009	101.173	18.7206	0.890717	-1.25247	0.0773876	1.06484	0.641401	2.48472	0.659102	39.6983	1508.54	0.921063	1.2042	1.06484	0.449312	0.183484	0.464694	0.0684117	2.47561	0.279441	2.71784	0.521449	39.5244	1497.09	0.888948	1.27175	2.47561	0.585641	0.046114	0.241378	2.06e-06	7	3627	c
490	352	65	10.2715	1.90229	6.47489	13.7489	325.417	103.733	27.5058	0.754464	-0.675167	0.0357245	2.0879	0.828943	7.10291	0.583857	33.8581	1088.41	1.20722	1.62231	2.0879	0.571947	0.269823	0.630158	0.0275806	6.52703	0.439745	6.82505	0.424601	33.3243	1050.71	1.16937	1.75925	6.52703	0.778037	0.0998908	0.410941	2.04e-06	7	3627	c
491	225	67	8.10266	2.27538	2.10315	11.9803	354.18	112.243	19.9983	0.505217	-1.10666	0.0525847	1.24362	0.733684	3.33486	0.648387	38.7283	1428.38	1.04167	1.38975	1.24362	0.477587	0.218777	0.537791	0.0459679	2.54491	0.442373	3.28191	0.546902	38.4491	1410.75	0.976882	1.44973	2.54491	0.595193	0.10433	0.384049	2.14e-06	7	3627	c
492	730	105	15.5688	4.21848	8.34251	23.9976	46.2448	130.843	44.1478	0.853095	1.48322	0.0843749	0.797589	0.785846	2.86218	0.733072	37.4947	1338.02	1.00671	1.25429	0.797589	0.414171	0.311309	0.608493	0.0594777	1.92138	0.50743	2.95037	0.606162	37.2453	1320.41	0.988881	1.39919	1.92138	0.548511	0.134661	0.427691	1.42e-06	5	788	c
493	242	47	8.55794	1.745	5.72356	11.2767	453.649	123.448	23.1493	0.808247	-0.636549	0.204707	0.373288	0.630914	1.50569	0.829795	34.1587	1122.56	0.678681	0.805816	0.373288	0.300883	0.245359	0.449191	0.154165	0.700508	0.350705	1.53944	0.722843	34.1218	1119.77	0.68066	0.91203	0.700508	0.382204	0.0673565	0.248181	2.31e-06	8	956	c
494	592	86	13.4116	1.72331	10.5354	17.5941	365.091	131.651	31.5473	0.582716	0.954379	0.0501885	0.909869	0.850943	4.05209	0.697439	37.6111	1343.6	1.11043	1.39823	0.909869	0.430561	0.326563	0.648516	0.0325597	2.48859	0.593234	4.059	0.524979	37.5266	1338.04	1.08088	1.57086	2.48859	0.592655	0.125539	0.435602	2.2e-06	2	3627	c
495	238	47	8.30995	0.914893	6.70196	10.0054	335.714	130.523	19.648	0.555272	1.19376	0.0452527	1.72171	0.720526	4.08027	0.618014	36.9042	1294.07	1.07854	1.46678	1.72171	0.534503	0.208245	0.537499	0.034125	4.36	0.374457	4.48498	0.481827	36.99	1300.43	1.06154	1.59755	4.36	0.684482	0.0866342	0.367003	2.19e-06	9	267	c
496	259	54	8.78583	1.79777	5.71251	12.4975	671.054	131.812	24.0555	0.799443	-0.248181	0.0616436	1.05538	0.774521	3.3403	0.682422	28.3632	755.632	1.02588	1.32304	1.05538	0.453325	0.260268	0.57175	0.0589628	2.52995	0.43329	3.23214	0.561238	28.4101	759.501	0.967421	1.39463	2.52995	0.605822	0.0783949	0.327958	1.39e-06	5	1556	c
497	512	84	12.6472	2.93265	7.50208	17.2349	237.326	142.292	35.3824	0.833072	-0.394184	0.0502104	0.927971	0.876382	4.75339	0.714192	37.8659	1361.8	1.15475	1.43699	0.927971	0.434947	0.363096	0.686578	0.0339468	2.322	0.682754	4.65961	0.554671	37.746	1352.72	1.13452	1.59105	2.322	0.576104	0.183495	0.524307	2.24e-06	8	3022	c
498	480	97	12.0427	4.0106	4.01559	19.591	187.393	140.037	38.4822	0.885887	-0.190473	0.0371656	2.17731	0.821002	7.08192	0.572123	33.7223	1079.48	1.20572	1.61232	2.17731	0.575082	0.26659	0.625299	0.0315844	5.8075	0.516986	7.01174	0.437351	33.2075	1044.93	1.16541	1.70918	5.8075	0.757694	0.098213	0.402279	2.22e-06	9	1423	c
499	254	66	8.86273	2.77096	2.58221	14.2074	535.279	144.607	26.8744	0.850601	0.784464	0.0914364	0.854283	0.642099	2.19346	0.70634	40.7519	1593.21	0.886103	1.14918	0.854283	0.420193	0.189025	0.461834	0.0664537	1.83756	0.223852	2.18377	0.573903	40.7513	1596.32	0.833615	1.22902	1.83756	0.537226	0.0287944	0.1878	2.52e-06	9	2957	c
500	469	95	12.0232	2.97003	6.89558	18.0313	666.815	151.673	33.0222	0.792049	0.863374	0.0809279	0.894675	0.750752	2.79475	0.726571	39.8789	1518.45	0.992276	1.26556	0.894675	0.427142	0.275762	0.576971	0.0665479	1.57784	0.514498	2.62495	0.618665	39.6728	1504.28	0.951251	1.33725	1.57784	0.512926	0.123053	0.401035	1.59e-06	6	1556	c
501	434	84	12.2608	3.91539	5.75271	20.0493	312.122	153.67	37.9938	0.902367	-0.805754	0.16508	0.432091	0.679341	1.67375	0.80518	33.103	1048.1	0.763554	0.908971	0.432091	0.318017	0.265694	0.493038	0.1292	0.868132	0.352196	1.67006	0.691209	32.967	1041.14	0.728385	1.00702	0.868132	0.416774	0.0665543	0.258805	2.23e-06	5	1491	c
502	191	51	7.6273	2.2479	4.08088	11.0864	467.834	143.212	24.0679	0.890609	0.157164	0.051932	1.12	0.780093	3.54653	0.646013	39.2415	1467.53	1.05162	1.37597	1.12	0.453722	0.257011	0.577535	0.0391089	3.33987	0.409951	3.83016	0.471111	39.0784	1455.7	1.02951	1.50431	3.33987	0.636354	0.0783914	0.339856	2.4e-06	8	325	c
503	253	51	8.65612	1.17045	6.7661	10.7337	514.547	153.151	21.1609	0.671525	0.660465	0.0727983	0.940217	0.711933	2.63194	0.696848	40.1337	1541.77	0.939516	1.21002	0.940217	0.436468	0.225067	0.514054	0.0638491	1.86408	0.458622	2.7216	0.568247	40.2136	1549	0.920074	1.26387	1.86408	0.54261	0.0893015	0.33381	2.58e-06	8	300	c
504	300	60	9.25613	1.25751	5.06716	11.1404	359.367	158.524	22.2866	0.549297	-0.0939343	0.0641157	1.80165	0.793979	5.37248	0.647405	34.9973	1163.38	1.11966	1.4844	1.80165	0.541944	0.271289	0.610269	0.060593	4.17787	0.475907	4.9858	0.504533	34.7233	1144.62	1.06538	1.54399	4.17787	0.691326	0.12361	0.429032	2.19e-06	7	991	c
505	404	76	11.4407	3.5018	5.20926	17.6361	461.336	165.032	35.0478	0.874998	-1.33227	0.0524499	0.896226	0.843949	3.87158	0.68531	38.2049	1387.65	1.09604	1.37276	0.896226	0.421274	0.332276	0.649096	0.0375417	2.52994	0.557781	3.86051	0.52317	37.9671	1370.89	1.06214	1.50614	2.52994	0.596034	0.126258	0.428605	2.41e-06	6	480	c
506	420	67	11.2265	1.48851	7.89607	13.8609	164.072	173.988	26.4726	0.532626	-0.0726431	0.0451352	0.842308	0.890042	4.83014	0.691923	36.95	1295.33	1.16106	1.43096	0.842308	0.409125	0.381062	0.700104	0.029224	2.241	0.699682	4.73104	0.518706	36.6454	1273.49	1.13759	1.60852	2.241	0.559828	0.179107	0.520824	2.22e-06	7	497	c
507	556	80	12.896	1.88148	9.22105	15.8549	361.502	177.444	32.0343	0.680769	-0.230414	0.102853	0.767274	0.818132	3.10942	0.755439	36.6723	1281.29	0.984455	1.21385	0.767274	0.406735	0.336573	0.622991	0.0764282	1.95382	0.557671	3.20856	0.624726	36.5643	1273.35	0.976819	1.34908	1.95382	0.553505	0.138997	0.427218	2.16e-06	4	991	c
508	345	65	10.2352	2.17557	6.14068	14.3645	569.301	178.868	27.7983	0.805271	1.49433	0.134918	0.553628	0.628681	1.74549	0.757256	41.2003	1635.03	0.794896	0.980004	0.553628	0.34668	0.202968	0.445628	0.112767	1.22105	0.187102	1.75105	0.649536	41.1298	1633.34	0.737348	1.07818	1.22105	0.468139	0.0309287	0.182492	2.67e-06	8	2957	c
509	237	51	8.23278	0.812615	6.39026	9.98981	512.835	177.503	18.3541	0.223803	-0.649266	0.0374547	1.57674	0.828823	5.6056	0.633749	35.8605	1219.6	1.17968	1.55086	1.57674	0.514948	0.298486	0.647801	0.0285126	3.53439	0.60393	5.46183	0.484845	35.5238	1196.67	1.13835	1.64378	3.53439	0.652038	0.173396	0.517763	2.7e-06	10	277	c
510	45	20	3.35283	0.637183	2.45	4.28981	142.58	180.006	9.49634	0.767542	-1.34764	0.093941	0.909091	0.483496	1.88004	0.67972	40.7692	1599.92	0.802911	1.07811	0.909091	0.419246	0.109748	0.343032	0.0998521	2.11538	0.176978	2.28513	0.496154	40.8846	1612.73	0.763537	1.05299	2.11538	0.520855	0.119997	0.354652	2.09e-06	4	70	c
511	323	80	9.88017	3.03497	1.90296	15.2142	636.321	188.653	27.334	0.717685	-1.54389	0.0316621	1.85491	0.850148	7.18915	0.594147	35.0122	1164.95	1.21791	1.61289	1.85491	0.547962	0.294122	0.65315	0.0248559	4.66008	0.636982	7.41852	0.441303	34.6364	1139.78	1.18838	1.72031	4.66008	0.707345	0.1813	0.538842	2.24e-06	8	2661	c
512	162	42	6.95359	1.65835	4.07282	9.679	471.726	186.267	20.1165	0.84433	-0.916702	0.061253	1.2028	0.703181	3.02615	0.648252	38.2902	1396.01	1.01949	1.34384	1.2028	0.471826	0.216793	0.527957	0.0461243	2.83846	0.319859	3.08667	0.495952	38.3154	1400.74	0.962643	1.42955	2.83846	0.604194	0.0610699	0.293456	2.51e-06	6	198	c
513	377	77	10.8457	2.49676	6.44607	16.3642	604.366	196.765	29.835	0.804864	1.34121	0.0372057	1.59782	0.791101	4.82439	0.623286	35.9469	1224.35	1.15248	1.53591	1.59782	0.521258	0.253701	0.599991	0.0274759	3.88746	0.492449	4.82963	0.47056	35.8617	1218.47	1.11925	1.66449	3.88746	0.675847	0.0996727	0.400265	2.61e-06	7	2661	c
514	278	53	8.99836	0.896564	7.57847	10.6319	452.813	203.097	20.785	0.520062	-1.33609	0.0888064	0.577188	0.776125	2.28909	0.742085	40.0442	1535.22	0.920815	1.11249	0.577188	0.344868	0.304003	0.573489	0.065612	1.32328	0.505552	2.33813	0.6125	39.9698	1530.85	0.895291	1.24015	1.32328	0.477117	0.118746	0.380681	2.4e-06	4	382	c
515	525	77	12.584	2.33374	8.12655	17.3093	316.907	213.533	32.4587	0.753786	-1.41501	0.0670792	0.994399	0.74822	2.97473	0.685345	37.7693	1356.81	1.02827	1.33008	0.994399	0.443025	0.247986	0.560143	0.0492697	2.27273	0.398844	2.8903	0.537349	37.6608	1351.37	0.971782	1.44923	2.27273	0.574099	0.0679978	0.311419	2.25e-06	5	604	c
516	254	64	9.38618	3.54877	3.54564	15.5305	562.185	213.659	31.8946	0.937062	1.24129	0.0898285	0.676633	0.759418	2.40624	0.748062	40.5393	1575.22	0.912602	1.13446	0.676633	0.385807	0.278801	0.554574	0.073997	1.37097	0.475549	2.30705	0.598387	40.4247	1568.5	0.869149	1.18739	1.37097	0.4777	0.106264	0.353213	2.92e-06	12	480	c
517	160	41	6.81906	1.4667	4.18277	9.35521	156.39	210.052	18.404	0.748572	-0.807511	0.0818717	0.766372	0.716362	2.35097	0.693274	39.2053	1469.38	0.933358	1.18347	0.766372	0.383062	0.250406	0.536047	0.058264	1.84127	0.377778	2.47959	0.526984	38.9524	1451.63	0.905679	1.33097	1.84127	0.504618	0.075493	0.314886	2.22e-06	7	226	c
518	675	112	15.5663	5.41584	6.72829	25.5581	284.453	229.817	49.8927	0.929276	-1.24144	0.0775677	0.774721	0.728082	2.42455	0.711204	39.6368	1501.86	0.946457	1.20094	0.774721	0.400203	0.244042	0.532739	0.0531571	2.00871	0.322241	2.48188	0.541658	39.5139	1494.44	0.906708	1.34594	2.00871	0.543804	0.042051	0.237011	2.37e-06	5	2058	c
519	679	104	14.2996	3.32579	8.3325	21.3714	648.794	226.902	39.1316	0.796149	1.55587	0.0448447	1.30122	0.838968	5.04027	0.663909	36.4129	1258.74	1.14425	1.48325	1.30122	0.484878	0.300743	0.639108	0.035948	3.16949	0.604938	5.01139	0.538347	36.2508	1247.17	1.11839	1.60227	3.16949	0.634171	0.137688	0.459292	2.3e-06	10	2661	c
520	94	30	5.02199	0.723944	3.64082	6.3814	139.067	211.286	12.7569	0.63609	0.266955	0.0725715	1.02174	0.615968	2.33028	0.653106	39.4193	1488.28	0.89681	1.19631	1.02174	0.434209	0.171011	0.447721	0.0536042	2.48485	0.179627	2.51446	0.500891	39.1818	1471.89	0.863169	1.31079	2.48485	0.576932	0.0246113	0.179261	2.1e-06	5	124	c
521	342	57	10.0842	1.12942	7.49371	11.8846	541.869	217.941	23.7395	0.581449	0.651949	0.0377082	1.30879	0.832153	4.89875	0.63651	35.8187	1214.62	1.17286	1.52317	1.30879	0.484613	0.301243	0.646045	0.0284528	3.09247	0.581083	4.69103	0.493084	35.5993	1200.48	1.12015	1.63447	3.09247	0.629362	0.143216	0.472083	2.94e-06	11	881	c
522	414	69	10.9655	1.82503	6.76365	13.5227	528.485	230.816	25.9478	0.496382	1.11217	0.0384451	1.26815	0.866093	5.73519	0.661219	35.416	1188.95	1.19199	1.52648	1.26815	0.479688	0.337611	0.679754	0.0251215	3.39601	0.646299	5.80068	0.48987	35.1396	1169.37	1.17546	1.69211	3.39601	0.641845	0.153163	0.494688	2.94e-06	9	881	c
523	332	67	10.0592	2.04633	7.02326	14.3625	415.537	238.017	26.3546	0.780838	-1.28403	0.203334	0.393564	0.721822	1.7074	0.840842	34.4266	1137.83	0.730969	0.875213	0.393564	0.309139	0.321151	0.533432	0.152221	0.75	0.476276	1.71603	0.734859	34.5458	1144.98	0.739435	0.981239	0.75	0.403323	0.121867	0.345783	2.23e-06	7	2243	c
524	622	87	13.8665	2.3069	9.87431	18.3271	494.11	250.56	35.3491	0.755715	0.610309	0.142291	0.521404	0.742434	2.01218	0.799854	39.5308	1499.27	0.856011	1.03093	0.521404	0.346142	0.315052	0.565603	0.109398	1.17509	0.455513	2.07908	0.68926	39.4783	1495.97	0.841161	1.1569	1.17509	0.463234	0.13751	0.396277	2.74e-06	6	1455	c
525	555	81	12.9659	1.70993	8.44514	16.554	443.344	254.72	29.7699	0.508034	1.54255	0.0785634	0.80462	0.862495	3.92578	0.738255	35.8027	1216.82	1.07635	1.31505	0.80462	0.413507	0.376342	0.675607	0.065744	1.96632	0.629847	3.65608	0.629489	35.52	1197.16	1.04531	1.415	1.96632	0.556456	0.201929	0.521791	2.4e-06	4	930	c
526	389	74	11.0314	2.92776	4.57885	16.4594	556.609	247.633	32.2267	0.829458	0.259538	0.0422557	1.51787	0.860133	6.42612	0.630535	35.5179	1199.35	1.17891	1.53437	1.51787	0.513481	0.306897	0.65318	0.0382636	4.21472	0.607783	6.37295	0.493423	35.1534	1174.64	1.13335	1.6184	4.21472	0.675047	0.156963	0.490848	3.01e-06	10	464	c
527	513	84	12.7434	3.44574	7.05294	17.8667	178.515	257.757	38.6036	0.878217	1.36364	0.0558717	1.90895	0.842084	7.04418	0.630281	32.4207	996.14	1.2138	1.57527	1.90895	0.557046	0.333854	0.684175	0.0433889	5.73826	0.515334	6.9198	0.517087	32.0559	971.295	1.17949	1.68624	5.73826	0.733804	0.16767	0.515294	2.39e-06	8	2075	c
528	218	61	8.11907	2.10693	4.24096	12.6245	298.406	249.6	21.985	0.768342	-0.345028	0.0635134	0.982984	0.738058	2.87634	0.685995	38.6139	1422.24	0.987798	1.27662	0.982984	0.439848	0.257877	0.561007	0.0428408	2.42857	0.454106	3.2244	0.54785	38.68	1427.16	0.988	1.43612	2.42857	0.594879	0.099402	0.373471	2.34e-06	8	2058	c
529	493	88	12.745	4.02797	5.81145	20.0499	138.239	267.496	40.1081	0.9005	0.534395	0.0425054	1.19405	0.878128	5.89877	0.642214	37.3671	1327.9	1.18017	1.52439	1.19405	0.468122	0.32533	0.668529	0.0284929	3.64165	0.636583	6.01029	0.472868	36.9976	1300.52	1.16293	1.69964	3.64165	0.657381	0.143074	0.480021	2.19e-06	5	956	c
530	465	98	13.1338	4.21701	6.04113	19.8809	289.258	270.234	40.7518	0.914932	1.17238	0.0551191	1.42435	0.792868	4.43827	0.666378	35.4468	1191.54	1.10723	1.44363	1.42435	0.504609	0.274961	0.60733	0.0428326	2.875	0.533604	4.08215	0.530966	35.0346	1163.8	1.05892	1.52186	2.875	0.607301	0.121046	0.421967	2.37e-06	9	2058	c
531	661	101	14.9369	4.77112	6.69103	23.7455	41.7221	275.479	45.2964	0.898715	-1.39416	0.0547164	1.39393	0.79544	4.40714	0.673903	33.8206	1080.26	1.13999	1.4727	1.39393	0.494224	0.296555	0.633375	0.0378563	2.91754	0.534249	4.13209	0.531356	33.4754	1058.14	1.09451	1.58827	2.91754	0.617639	0.124295	0.435681	1.33e-06	3	1697	c
532	228	56	8.46675	2.33902	4.32025	12.932	506.249	272.819	25.4634	0.864922	-1.02235	0.0300938	2.37961	0.758152	5.91964	0.544169	35.4484	1191.49	1.18196	1.63578	2.37961	0.586922	0.208317	0.562493	0.0215022	6.02874	0.35737	5.69067	0.377539	34.9138	1153.94	1.13211	1.74715	6.02874	0.74545	0.0717005	0.34906	2.8e-06	6	1455	c
533	263	62	8.8075	1.3447	6.65803	11.4557	490.623	274.602	21.3704	0.583639	-1.3892	0.0518076	1.1619	0.786103	3.71604	0.651279	37.7714	1356.65	1.07065	1.37949	1.1619	0.465896	0.26973	0.591229	0.0389692	3.27854	0.411867	3.78724	0.508961	37.653	1349.32	1.02719	1.51407	3.27854	0.634177	0.0821361	0.348753	2.71e-06	4	1455	c
534	291	61	9.18255	1.84964	6.12685	13.1048	526.978	283.878	24.4914	0.746564	-1.46978	0.0652816	1.2	0.703119	3.02101	0.675158	37.9166	1368.48	1.01673	1.34988	1.2	0.474644	0.221081	0.533887	0.0500276	2.61181	0.332927	2.95767	0.57073	37.7932	1362.06	0.957873	1.42777	2.61181	0.60161	0.0962892	0.366724	2.86e-06	8	928	c
535	389	68	10.828	2.40117	7.14169	14.736	542.523	291.866	30.4965	0.825146	-1.48534	0.0726469	1.56189	0.776004	4.48643	0.652545	35.007	1164.27	1.06756	1.40865	1.56189	0.524044	0.245295	0.570558	0.0556412	3.69369	0.443085	4.31621	0.536005	34.8468	1153.6	1.02328	1.49989	3.69369	0.656401	0.0969701	0.376492	2.86e-06	10	928	c
536	406	66	11.6257	3.09531	7.0692	16.8821	174.051	292.933	34.0674	0.885996	0.643007	0.0651324	0.977364	0.79793	3.41838	0.713966	37.4647	1333.7	1.06407	1.3552	0.977364	0.444942	0.304457	0.620759	0.0501449	2.40233	0.497091	3.38844	0.584341	37.2536	1319.81	1.02299	1.45368	2.40233	0.57986	0.15251	0.461923	2.35e-06	7	483	c
537	425	71	11.4694	2.01685	8.46568	15.7039	288.847	300.182	30.1436	0.765225	-1.09407	0.0825327	1.52695	0.81713	5.17497	0.679904	33.1363	1042.05	1.09135	1.41483	1.52695	0.510705	0.317816	0.643507	0.0719664	3.41129	0.578681	5.04834	0.56481	32.9866	1032.54	1.05289	1.49379	3.41129	0.63983	0.175403	0.499641	2.28e-06	10	2058	c
538	473	83	11.9868	2.38973	7.1044	16.5078	135.295	303.787	30.8838	0.70759	1.22362	0.0665159	0.908467	0.795182	3.21774	0.711312	37.5183	1339.02	1.0346	1.30858	0.908467	0.430858	0.290109	0.5988	0.0480587	2.00752	0.54483	3.20524	0.568703	37.386	1330.57	1.00251	1.43853	2.00752	0.548126	0.11954	0.40883	2.24e-06	6	1963	c
539	644	91	14.2279	3.54636	7.7503	20.1615	451.796	307.984	40.8228	0.855813	1.39631	0.0810224	1.18678	0.714255	3.07664	0.701956	34.9496	1158.86	1.0123	1.31113	1.18678	0.471442	0.251605	0.560653	0.0662732	2.40036	0.386185	2.95528	0.600652	34.7669	1148.21	0.961729	1.39288	2.40036	0.585441	0.10375	0.375993	2.53e-06	4	719	c
540	419	90	11.4648	2.99796	4.72165	16.5759	35.584	310.29	28.6684	0.634923	1.56181	0.0418481	1.46058	0.830584	5.31063	0.661445	33.4606	1057.02	1.19232	1.53942	1.46058	0.506117	0.322494	0.668373	0.033569	3.20397	0.600165	5.00661	0.534862	33.1473	1037.36	1.13885	1.62012	3.20397	0.643148	0.1645	0.502028	1.45e-06	4	1697	c
541	418	104	11.0883	3.39613	2.96734	19.8038	413.168	311.974	30.0898	0.681449	1.2457	0.10695	0.558764	0.739692	2.07328	0.767361	33.0195	1039.31	0.839082	1.02356	0.558764	0.355327	0.279223	0.531638	0.0791919	1.32424	0.451684	2.20756	0.636061	32.9909	1037.83	0.830042	1.14305	1.32424	0.486496	0.099651	0.336113	2.43e-06	5	4273	c
542	486	84	12.5943	4.01777	6.09273	19.5174	87.0246	318.002	40.0599	0.909456	1.4075	0.061536	0.91121	0.816848	3.48757	0.705393	36.5339	1266.44	1.07405	1.34029	0.91121	0.432579	0.323344	0.635345	0.0438723	2.03178	0.555942	3.28774	0.55123	36.3252	1252.72	1.03207	1.45538	2.03178	0.552354	0.126186	0.421902	2.04e-06	3	692	c
543	361	72	10.4695	2.18583	5.60757	14.949	259.177	312.519	27.8901	0.744696	-0.716551	0.0270714	2.28322	0.862486	9.30177	0.601738	33.3478	1058.52	1.29168	1.71983	2.28322	0.577955	0.29961	0.674173	0.0225667	5.82333	0.644181	9.183	0.456798	32.9633	1031.91	1.26161	1.78056	5.82333	0.735695	0.205096	0.578186	2.24e-06	9	1791	c
544	379	73	11.3455	3.58215	5.70233	17.7477	638.26	319.826	34.831	0.906145	1.24228	0.0840781	0.701308	0.725589	2.27784	0.724346	40.4353	1566.41	0.913113	1.14435	0.701308	0.383947	0.245424	0.523402	0.064867	1.4373	0.422256	2.24389	0.590032	40.4341	1568.5	0.874484	1.24332	1.4373	0.485328	0.0744885	0.302843	2.02e-06	3	482	c
545	488	77	12.4391	2.85619	7.78317	17.7572	366.487	321.389	34.6437	0.836321	1.19513	0.0868009	0.94989	0.746562	2.87401	0.723798	36.832	1291.79	0.981742	1.2495	0.94989	0.441795	0.270437	0.568726	0.0607485	2.21343	0.394167	2.82676	0.583503	36.6403	1278.66	0.953178	1.38251	2.21343	0.571887	0.0751197	0.319826	2.3e-06	3	4273	c
546	652	91	14.3147	2.91977	9.62502	20.6217	485.555	326.772	36.6393	0.728196	-1.25877	0.0651637	1.00327	0.780341	3.28369	0.692591	37.8835	1364.18	1.05897	1.3601	1.00327	0.446176	0.274784	0.592966	0.050853	2.31729	0.439443	3.06695	0.549965	37.6791	1351.63	0.995583	1.45386	2.31729	0.584499	0.0904354	0.358673	2.61e-06	3	795	c
547	660	97	14.3796	2.83874	9.52605	20.1598	428.339	334.767	37.7709	0.786204	1.47417	0.110332	0.466181	0.800829	2.1703	0.795099	32.5707	1007.62	0.89403	1.05253	0.466181	0.330206	0.34874	0.599089	0.0775315	1.0802	0.55225	2.20626	0.662387	32.5068	1003.61	0.886188	1.19714	1.0802	0.451181	0.135184	0.399172	2.53e-06	4	4273	c
548	435	64	11.3472	0.757431	9.54565	12.9552	170.674	331.005	25.6046	0.484561	-0.931024	0.138897	0.993235	0.653333	2.43255	0.735875	35.7276	1219.22	0.878145	1.11567	0.993235	0.445889	0.221893	0.492996	0.10927	1.77628	0.293451	2.25701	0.641264	35.4205	1199.95	0.827092	1.17319	1.77628	0.534162	0.057812	0.259731	2.22e-06	4	495	c
549	262	52	8.80483	1.50077	6.19177	11.3456	287.53	328.348	23.6596	0.767269	-0.963962	0.0396352	2.19561	0.838879	7.81353	0.573694	33.5973	1073.99	1.21009	1.62693	2.19561	0.578032	0.273591	0.634735	0.0324994	5.84862	0.567504	7.76148	0.419628	33.4174	1060.4	1.18071	1.68971	5.84862	0.752856	0.147803	0.48618	2.1e-06	5	293	c
550	373	67	10.5636	2.00963	7.43321	14.16	38.0245	329.562	28.5836	0.789472	-0.00835211	0.113597	1.0979	0.744232	3.14628	0.699211	35.694	1213.81	0.961828	1.25353	1.0979	0.463587	0.240381	0.538515	0.0865705	2.3125	0.400035	2.9272	0.583623	35.3651	1191.69	0.922534	1.33413	2.3125	0.574709	0.102424	0.36624	1.58e-06	3	1697	c
551	474	84	12.0967	2.27053	8.16657	17.5771	233.888	332.774	31.6086	0.722461	-0.661047	0.0285877	2.1621	0.8622	8.84508	0.585628	31.5457	944.645	1.28965	1.72103	2.1621	0.566104	0.306623	0.681033	0.0193955	5.88337	0.617454	8.68977	0.442343	31.1935	921.05	1.25737	1.8702	5.88337	0.74543	0.153119	0.516363	2.1e-06	5	1791	c
552	338	64	10.1325	2.09609	5.51423	13.925	255.37	336.219	27.7154	0.801371	1.25494	0.0414181	1.2029	0.842654	4.82245	0.638903	36.9936	1299.6	1.13946	1.46434	1.2029	0.464725	0.3047	0.639734	0.0298897	3.38321	0.571937	4.95177	0.464817	36.4635	1262.4	1.10845	1.61581	3.38321	0.641763	0.124148	0.438807	2.04e-06	7	1791	c
553	470	81	11.9516	2.60745	5.57797	15.9448	353.387	338.61	28.0881	0.418297	-0.362888	0.0971324	1.27158	0.797319	4.13689	0.694484	35.5224	1200.48	1.03755	1.34254	1.27158	0.484796	0.278061	0.593147	0.0845852	3.06112	0.522505	4.2054	0.576594	35.4768	1198.07	1.00486	1.42244	3.06112	0.627587	0.122679	0.411884	2.25e-06	1	4273	c
554	335	61	10.0337	2.15954	6.67316	14.1852	517.02	334.865	28.0309	0.829877	-0.179782	0.129381	0.646629	0.681978	2.01664	0.753696	31.2299	925.534	0.863558	1.07824	0.646629	0.377919	0.239235	0.503963	0.106257	1.23404	0.375678	1.98831	0.667584	31.1064	919.746	0.823932	1.1659	1.23404	0.481277	0.0767944	0.298172	2.61e-06	4	1226	c
555	327	68	9.74057	1.54173	7.09662	12.3459	567.271	338.462	24.3996	0.654516	1.44775	0.0424942	1.133	0.838872	4.51583	0.650198	37.6414	1345.41	1.13825	1.4629	1.133	0.45396	0.304662	0.639459	0.030638	2.58909	0.617076	4.38068	0.4932	37.4982	1335.17	1.10816	1.59816	2.58909	0.583341	0.137249	0.458073	2.46e-06	5	859	c
556	477	82	12.4271	3.91882	4.51977	19.4294	85.3419	353.058	38.0192	0.871556	0.852056	0.0275505	2.23339	0.790333	6.32604	0.573018	33.9722	1090.76	1.23553	1.68648	2.23339	0.577478	0.245621	0.613506	0.0168404	6.04481	0.504926	7.10495	0.400065	34.0024	1092.47	1.22891	1.86424	6.04481	0.751925	0.0916455	0.404894	2.12e-06	6	559	c
557	296	69	9.95186	3.31916	4.58434	15.9311	450.633	355.157	32.0605	0.911867	-1.29366	0.0518196	1.35052	0.78374	4.12243	0.662468	37.373	1327.06	1.09735	1.44448	1.35052	0.500365	0.278051	0.610576	0.0337091	3.50602	0.501489	4.5165	0.487413	37.3936	1328.39	1.09162	1.60005	3.50602	0.6601	0.113895	0.419187	2.56e-06	6	325	c
558	202	49	7.72931	1.12356	5.79193	9.59249	499.582	351.435	19.6293	0.657836	-1.2474	0.0386179	3.54306	0.786865	9.31175	0.516988	32.0153	976.735	1.24142	1.70074	3.54306	0.667886	0.246395	0.61639	0.0392969	9.2875	0.421835	9.03187	0.400877	31.65	951.52	1.17575	1.65465	9.2875	0.835826	0.123653	0.442654	2.53e-06	6	1226	c
559	417	65	11.1452	1.08526	9.2806	13.5745	583.42	352.97	24.8933	0.385761	-0.517917	0.0650503	1.08962	0.814242	3.93291	0.684522	35.167	1172.39	1.08261	1.37102	1.08962	0.463663	0.315112	0.633402	0.0453693	2.64407	0.528442	3.80354	0.53498	34.9774	1159.96	1.04526	1.48466	2.64407	0.601883	0.12708	0.42717	2.23e-06	3	859	c
560	481	87	12.0617	2.09598	7.592	16.0415	233.715	358.465	29.3901	0.586703	0.776897	0.0315723	1.7538	0.864229	7.45868	0.606412	33.4924	1063.68	1.24963	1.63077	1.7538	0.533762	0.318028	0.678435	0.0213658	4.62283	0.623416	7.13784	0.437316	33.0447	1033.35	1.21034	1.76953	4.62283	0.69478	0.147345	0.495303	1.87e-06	2	1791	c
561	284	57	9.27706	2.04342	5.68832	13.1345	46.5716	353.367	25.2228	0.780893	0.0121954	0.0404759	1.68762	0.799647	5.21163	0.627505	35.9487	1225.04	1.1654	1.53834	1.68762	0.527868	0.273589	0.621195	0.0340935	3.83966	0.556497	5.32879	0.484424	35.7722	1213.5	1.13072	1.6072	3.83966	0.660945	0.143701	0.469352	1.77e-06	6	332	c
562	751	116	14.746	3.8306	6.23619	20.2078	682.545	368.6	41.2313	0.746383	1.18018	0.0523529	0.804791	0.904798	5.22676	0.725784	36.7326	1281.79	1.156	1.41595	0.804791	0.413571	0.401561	0.713484	0.0372133	1.9713	0.766208	5.21592	0.599222	36.5846	1270.47	1.15042	1.57359	1.9713	0.557985	0.237404	0.587799	1.24e-06	5	3923	c
563	449	74	11.5945	1.84065	6.92067	14.4514	706.936	360.974	29.082	0.671441	0.084747	0.0374709	1.66287	0.87458	7.62917	0.640602	34.0204	1100.22	1.22764	1.59841	1.66287	0.524693	0.322932	0.677987	0.0294732	3.92838	0.705189	7.66254	0.496857	33.6048	1073.21	1.19357	1.7016	3.92838	0.670253	0.197774	0.558258	1e-06	4	3923	c
564	357	67	10.4651	2.22218	5.36776	14.7129	351.682	368.535	28.446	0.802019	-0.981532	0.055389	1.33053	0.782341	4.05646	0.681063	37.8588	1361.72	1.10517	1.44048	1.33053	0.485941	0.282067	0.61391	0.0417334	2.78247	0.530594	3.96382	0.549568	37.8539	1362.1	1.07032	1.53913	2.78247	0.613587	0.136772	0.449725	2.2e-06	2	1342	c
565	207	51	8.10482	2.16444	4.41251	11.8214	58.4431	368.928	24.0628	0.871499	-0.815071	0.0611394	1.19372	0.770768	3.60375	0.645237	38.3615	1400.7	1.05898	1.39418	1.19372	0.466781	0.247195	0.570204	0.0417332	3.12651	0.42148	3.70216	0.485954	38.1506	1386.89	1.01295	1.50879	3.12651	0.627823	0.0991742	0.38167	1.91e-06	7	1508	c
566	442	73	11.4331	1.22735	8.99533	13.9096	36.5636	374.995	27.1082	0.552601	0.359871	0.0501689	1.78928	0.839565	6.57635	0.630409	32.5956	1007.25	1.18335	1.55359	1.78928	0.545654	0.293725	0.643632	0.0377956	4.5752	0.572145	6.34667	0.491707	32.1953	980.146	1.15763	1.66133	4.5752	0.701879	0.131159	0.456066	1.64e-06	6	1508	c
567	309	63	9.80043	2.75387	4.84387	14.6093	591.526	377.094	29.5312	0.880068	-1.21602	0.0621041	1.01156	0.828286	3.94546	0.708246	37.9307	1368.84	1.07867	1.36057	1.01156	0.445172	0.317979	0.634155	0.0455903	2.41985	0.588065	3.93717	0.564226	37.916	1367.39	1.06419	1.49672	2.41985	0.5955	0.142066	0.452311	1.97e-06	5	369	c
568	394	76	10.7331	2.94781	3.48374	15.8041	75.5669	382.519	30.4887	0.739531	1.34964	0.0323769	1.5059	0.849494	6.00277	0.607487	35.9972	1229.54	1.19727	1.56859	1.5059	0.506705	0.306567	0.658259	0.0220203	4.21277	0.593786	6.1854	0.445245	35.7082	1209.06	1.17517	1.73305	4.21277	0.68124	0.129517	0.461923	2.01e-06	10	480	c
569	305	57	9.55001	1.5019	6.30355	12.2917	424.123	378.068	24.2338	0.713365	-1.03583	0.0735317	1.13405	0.75551	3.31921	0.685933	38.2261	1391.29	1.03547	1.34345	1.13405	0.470969	0.268417	0.583655	0.052715	2.94636	0.385182	3.39612	0.554471	38.2184	1391.52	1.00442	1.4708	2.94636	0.625158	0.0966809	0.37255	2.55e-06	9	331	c
570	216	48	7.86295	1.16445	5.2999	9.97107	217.178	379.708	19.855	0.655783	1.47827	0.0446803	2.23333	0.724436	5.0523	0.606292	35.1282	1169.04	1.14193	1.53787	2.23333	0.576976	0.238451	0.583564	0.0287852	4.81609	0.40638	5.05655	0.446641	34.8046	1146.19	1.11816	1.66539	4.81609	0.702188	0.118607	0.4352	1.75e-06	2	247	c
571	384	71	11.048	2.90642	5.07707	16.111	458.476	386.837	31.3856	0.793033	-1.35808	0.0379013	2.17505	0.845289	8.02942	0.607592	33.3161	1054.63	1.24285	1.64997	2.17505	0.5768	0.297691	0.662165	0.0290564	4.92523	0.629419	7.64529	0.468928	32.9626	1029.9	1.20969	1.74021	4.92523	0.70622	0.156547	0.505851	2.44e-06	7	484	c
572	487	88	12.2605	3.0512	6.28005	17.9831	356.016	390.16	35.0662	0.816151	-0.811613	0.0439716	1.03242	0.89768	6.04504	0.680245	37.1811	1316.12	1.16762	1.46061	1.03242	0.452269	0.366659	0.69351	0.0322724	2.89549	0.722312	6.21356	0.523274	37.057	1306.7	1.158	1.60537	2.89549	0.623847	0.192237	0.537817	2.2e-06	2	1342	c
573	640	102	13.5449	3.17968	5.73383	18.9854	524.877	394.27	36.0817	0.716884	-0.883954	0.0837104	0.675539	0.797205	2.66557	0.751398	30.7389	892.221	0.969229	1.19583	0.675539	0.386486	0.311549	0.597329	0.0577271	1.5245	0.546301	2.68008	0.617594	30.7586	894.023	0.945408	1.32768	1.5245	0.513004	0.119159	0.393495	2.14e-06	6	1279	c
574	293	59	9.45014	2.36126	4.8678	13.0851	394.118	392.703	27.4165	0.842979	-1.15807	0.0705237	0.846442	0.819604	3.34607	0.708108	39.2322	1469.13	1.01446	1.27805	0.846442	0.4184	0.307011	0.609049	0.0640211	2.16456	0.514046	3.22712	0.571619	38.9156	1447.15	0.962974	1.36554	2.16456	0.577678	0.116321	0.393949	2.47e-06	11	358	c
575	600	91	13.4914	2.66434	7.72984	18.0495	34.4313	401.922	35.1124	0.714041	0.424023	0.0369795	1.81543	0.839906	6.66987	0.625771	32.8649	1021.18	1.2372	1.62714	1.81543	0.544131	0.311861	0.672188	0.0266429	4.9283	0.578467	6.8457	0.465033	32.6717	1007.59	1.22112	1.76494	4.9283	0.714871	0.137111	0.478327	1.54e-06	8	1508	c
576	303	56	9.5819	1.57377	6.74509	12.6715	140.136	398.293	24.7126	0.752531	0.819702	0.108345	0.907374	0.658158	2.32718	0.708183	37.652	1355.12	0.899865	1.15369	0.907374	0.432628	0.204917	0.481212	0.0955359	1.91571	0.292269	2.35342	0.581429	37.6552	1358.64	0.842898	1.21461	1.91571	0.538569	0.0436965	0.229813	1.96e-06	6	1185	c
577	540	91	13.3374	4.25111	5.10431	20.437	573.8	407.865	41.4725	0.904485	1.27296	0.105382	0.575848	0.74461	2.12739	0.763573	39.8842	1524.48	0.890046	1.0858	0.575848	0.36019	0.286451	0.551751	0.0794251	1.16383	0.467729	2.09327	0.647872	39.8234	1521.62	0.85661	1.18936	1.16383	0.465539	0.0985204	0.340522	1.84e-06	4	643	c
578	350	60	10.1536	0.952585	8.27231	13.4027	368.449	405.336	23.2223	0.493436	-0.207846	0.135763	0.963566	0.725435	2.75471	0.726042	37.0535	1311.31	0.925197	1.17172	0.963566	0.443034	0.259288	0.54282	0.106448	2.0604	0.43393	2.81992	0.622366	36.953	1306.91	0.874002	1.20649	2.0604	0.561954	0.0830121	0.314986	2.28e-06	5	1342	c
579	486	98	13.4479	4.94944	5.03409	22.6237	599.682	417.889	44.4447	0.928072	-1.51311	0.0654017	0.863739	0.797495	3.13263	0.709188	38.6982	1426.61	1.02933	1.2975	0.863739	0.421129	0.287333	0.594112	0.0465264	1.94321	0.5438	3.12978	0.545868	38.5704	1418.94	0.988941	1.41849	1.94321	0.531391	0.114013	0.396992	1.65e-06	3	674	c
580	476	74	11.855	2.24022	7.85211	15.9011	82.6489	413.538	31.5504	0.7655	-1.34769	0.0677921	0.945321	0.809281	3.47832	0.715667	37.8044	1360.91	1.03559	1.31784	0.945321	0.440039	0.294558	0.604727	0.0538265	2.28606	0.546707	3.52161	0.582341	37.7139	1355.76	0.999341	1.42337	2.28606	0.566122	0.134405	0.430611	1.84e-06	8	565	c
581	464	83	11.8283	2.61551	6.83516	15.9195	690.619	416.648	31.3412	0.732982	-1.30929	0.0900404	0.701816	0.749372	2.40011	0.736965	29.3052	809.152	0.945847	1.17714	0.701816	0.389978	0.2777	0.562018	0.0673111	1.3985	0.480292	2.34546	0.61548	29.3734	814.417	0.905321	1.27059	1.3985	0.48618	0.101771	0.356887	1.07e-06	5	3923	c
582	433	72	11.4789	2.63679	6.45857	15.5953	369.014	425.704	32.2093	0.830649	-0.0206558	0.086652	0.883085	0.735752	2.67094	0.720222	38.245	1395.8	0.962334	1.22172	0.883085	0.429401	0.257321	0.550344	0.0586908	1.92916	0.434106	2.70452	0.578675	38.1253	1387.67	0.939532	1.35618	1.92916	0.554414	0.0719904	0.310351	2.23e-06	7	2339	c
583	781	97	15.685	3.79315	9.64014	22.1584	551.506	442.296	44.4222	0.845498	-1.46106	0.0537325	0.781504	0.868006	3.96038	0.713313	37.8506	1361.11	1.10753	1.36254	0.781504	0.403605	0.36298	0.673432	0.0395122	1.83163	0.668995	3.76676	0.578202	37.6266	1346.26	1.06133	1.47622	1.83163	0.540515	0.177316	0.499655	1.72e-06	5	1211	c
584	783	107	15.5603	3.82303	9.24027	22.1718	689.404	451.759	43.9736	0.823146	-0.486471	0.047935	1.77095	0.864079	7.51466	0.638146	31.0068	909.679	1.25125	1.62287	1.77095	0.544027	0.340866	0.697616	0.037466	4.70365	0.613283	7.08152	0.510805	30.5927	882.148	1.22391	1.72515	4.70365	0.705006	0.167706	0.520379	1.06e-06	4	3923	c
585	403	77	11.5112	3.39783	4.74806	17.0301	576.792	473.69	34.8493	0.879992	-1.20001	0.0477231	0.947262	0.859653	4.37472	0.680241	36.616	1271.44	1.13514	1.42454	0.947262	0.429108	0.343169	0.667633	0.0475659	1.9195	0.704226	4.24489	0.592326	36.3839	1257.82	1.07436	1.47229	1.9195	0.54935	0.206743	0.536524	1.66e-06	4	1907	c
586	406	89	12.1468	3.82489	6.17395	19.9298	588.981	489.6	36.163	0.898204	-1.36632	0.0431364	1.42253	0.761219	3.97872	0.62881	36.8901	1290.84	1.1082	1.48342	1.42253	0.498399	0.241514	0.578506	0.0315215	3.39701	0.408083	3.8695	0.48343	36.9254	1295.31	1.04745	1.58611	3.39701	0.647852	0.0932994	0.379179	1.72e-06	4	1907	c
587	437	70	11.4431	1.52849	7.45404	14.2234	671.418	484.103	24.9505	0.178531	0.549332	0.0432959	1.23044	0.859952	5.39292	0.670587	35.6161	1203.03	1.16786	1.49707	1.23044	0.478564	0.332775	0.670733	0.02967	3.1883	0.644791	5.48792	0.513316	35.7379	1210.62	1.15678	1.65095	3.1883	0.630413	0.15442	0.491317	1.28e-06	3	1407	c
588	382	69	10.7433	2.37334	6.9464	15.7891	184.768	491.167	29.2072	0.814985	1.52129	0.0822547	0.770922	0.79128	2.84678	0.730284	38.066	1380.73	0.996957	1.23284	0.770922	0.40796	0.318196	0.610581	0.0608008	1.85	0.479743	2.77797	0.593603	38.025	1378.89	0.962497	1.35215	1.85	0.537038	0.121837	0.401127	1.61e-06	6	648	c
589	356	72	10.6025	3.3765	5.09412	16.3717	207.593	492.902	34.2903	0.899447	1.56001	0.0343687	2.33436	0.805419	6.99841	0.563719	33.6057	1071.04	1.21159	1.64141	2.33436	0.588919	0.252929	0.615044	0.026405	6.34364	0.478912	7.08693	0.43134	33.079	1035.74	1.17707	1.74753	6.34364	0.766361	0.108518	0.426255	1.7e-06	8	388	c
590	250	52	8.85377	1.78252	5.48168	12.5503	254.332	491.784	23.424	0.766594	-1.00619	0.118265	0.624861	0.747499	2.23734	0.768812	30.8602	903.317	0.876946	1.07545	0.624861	0.376878	0.294191	0.556708	0.0838045	1.16749	0.500884	2.16956	0.634975	30.7438	896.601	0.859232	1.16843	1.16749	0.458161	0.116913	0.367494	1.76e-06	9	1939	c
591	436	82	12.4835	4.45517	5.30032	20.2447	362.144	495.51	40.1292	0.927751	0.551246	0.130645	0.52005	0.742653	2.01041	0.790351	32.5188	1006.62	0.847133	1.02532	0.52005	0.349038	0.300637	0.551601	0.0908518	1.12637	0.445072	2.01488	0.651099	32.5604	1009.34	0.836507	1.14901	1.12637	0.456035	0.0880027	0.31681	2.09e-06	2	5897	c
592	439	80	11.896	3.41659	6.29573	18.7079	688.529	499.066	34.9451	0.855312	-0.411212	0.105539	0.642857	0.715389	2.12936	0.749379	31.2553	925.878	0.890775	1.11153	0.642857	0.376985	0.248182	0.519778	0.0768959	1.27273	0.432144	2.12064	0.614876	31.2562	927.481	0.854367	1.2096	1.27273	0.46854	0.081297	0.312129	1.22e-06	4	1407	c
593	785	98	15.6878	2.52394	10.0251	21.0363	25.7006	508.752	38.6443	0.711022	0.893556	0.0848908	0.517869	0.878029	3.12292	0.787593	38.1888	1390.38	1.00807	1.18098	0.517869	0.347871	0.425114	0.686605	0.0595332	1.17697	0.719367	3.09698	0.663929	38.073	1381.41	1.00279	1.3142	1.17697	0.473724	0.231991	0.540093	8.56e-07	3	2602	c
594	304	61	9.58587	2.30544	5.71962	13.0193	268.69	507.199	27.0631	0.827282	-0.488338	0.151794	0.69196	0.574559	1.81323	0.768797	31.6116	952.205	0.795268	1.01279	0.69196	0.391432	0.199044	0.447863	0.12816	1.076	0.252491	1.71972	0.6828	31.652	958.244	0.725621	1.04382	1.076	0.460316	0.060038	0.250131	1.82e-06	6	1939	c
595	432	86	11.2285	3.76383	3.38757	17.7538	574.251	514.323	35.4383	0.852815	0.188529	0.109835	0.623484	0.743248	2.21418	0.755648	31.2029	922.953	0.892537	1.10803	0.623484	0.373376	0.273128	0.54375	0.0881388	1.11714	0.507977	2.13526	0.673765	31.1571	922.492	0.841013	1.1484	1.11714	0.463282	0.126259	0.37866	1.93e-06	8	1907	c
596	371	71	10.5575	1.73414	7.31842	13.8816	274.173	525.672	26.7928	0.711555	-0.87385	0.046304	1.57416	0.789326	4.73601	0.636448	34.9442	1156.19	1.13852	1.50312	1.57416	0.52218	0.261208	0.602824	0.0329346	3.9625	0.493305	4.91015	0.501786	34.7563	1143.7	1.11066	1.6513	3.9625	0.681844	0.111165	0.420294	1.86e-06	7	1939	c
597	134	50	5.94384	1.86996	0.868332	9.43366	565.597	525.077	15.0319	0.427997	0.503868	0.158178	0.594595	0.614276	1.77075	0.759459	32.518	1011.86	0.747485	0.935856	0.594595	0.36491	0.191719	0.424257	0.136177	0.884211	0.338857	1.6687	0.684211	32.6316	1020.69	0.711429	0.958955	0.884211	0.415239	0.0584198	0.2368	2.02e-06	8	1907	c
598	457	73	11.9413	2.42435	7.59557	17.2669	672.288	534.715	31.8917	0.802384	-1.11858	0.0749352	1.01649	0.690231	2.64072	0.694268	37.2356	1320.67	0.970958	1.27248	1.01649	0.444247	0.213465	0.512056	0.0654938	1.8725	0.373818	2.49517	0.580089	37.4575	1340.4	0.902213	1.32479	1.8725	0.543891	0.0626581	0.286573	1.67e-06	6	4706	c
599	379	61	10.5481	0.894159	7.97972	12.0186	369.044	532.562	23.9146	0.470963	1.19397	0.0550162	1.04836	0.832154	4.123	0.677364	36.9147	1294.48	1.09522	1.40214	1.04836	0.447099	0.310393	0.634508	0.0401942	2.41304	0.592797	3.96295	0.536017	36.7174	1281.95	1.04508	1.51781	2.41304	0.581398	0.146695	0.46216	2.13e-06	5	436	c
600	792	120	15.7217	3.8146	6.98234	23.8716	397.072	548.915	44.2419	0.808744	-1.23032	0.0658773	0.804054	0.843758	3.5731	0.737289	37.1709	1312.37	1.07549	1.32341	0.804054	0.414825	0.354579	0.659308	0.0454583	1.93179	0.615088	3.50938	0.601168	37.0406	1303.3	1.05189	1.46767	1.93179	0.543442	0.168942	0.487086	2.23e-06	7	5897	c
601	393	66	10.846	1.4647	8.21074	13.9585	576.789	548.7	25.6912	0.557288	1.36419	0.0578079	1.42946	0.791653	4.43048	0.658075	33.4157	1055.01	1.12448	1.47001	1.42946	0.507432	0.279559	0.616288	0.0480884	3.53012	0.462092	4.28135	0.536904	33.1386	1037.89	1.07148	1.57207	3.53012	0.658156	0.116812	0.420938	2.26e-06	8	1279	c
602	192	60	8.54135	3.71866	2.07371	14.8054	594.063	551.475	30.8845	0.959977	-1.33383	0.06316	1.54217	0.534132	2.65515	0.605351	37.1898	1317.67	0.9601	1.33806	1.54217	0.510687	0.123341	0.401604	0.0671244	3.23404	0.0936311	2.78407	0.486319	37.2766	1327.22	0.89913	1.36106	3.23404	0.640105	0.04047	0.233813	2.28e-06	8	1279	c
603	489	88	11.9962	2.34835	5.68456	16.9094	174.791	557.306	30.0273	0.637936	1.43796	0.189358	0.389545	0.759119	1.80858	0.83086	34.6953	1153.45	0.774816	0.911772	0.389545	0.308235	0.33615	0.55513	0.137004	0.760705	0.57853	1.90244	0.734509	34.6247	1146.73	0.803363	1.04002	0.760705	0.404714	0.16144	0.408577	1.42e-06	4	1316	c
604	353	73	10.3308	1.65865	6.98552	13.926	419.244	553.043	23.9241	0.493864	-1.18245	0.0589687	0.886558	0.814561	3.39042	0.686325	38.0085	1374.94	1.04551	1.31879	0.886558	0.418732	0.300943	0.610927	0.0456986	2.2381	0.512605	3.29598	0.544338	37.8844	1368.04	0.991285	1.42119	2.2381	0.574841	0.0976972	0.368541	2.26e-06	8	5897	c
605	427	64	11.2465	1.02427	9.15733	13.1902	281.625	557.156	26.3582	0.578324	1.45826	0.0457912	1.26019	0.832798	4.76845	0.679895	36.1041	1235.36	1.15341	1.47978	1.26019	0.47388	0.323112	0.659261	0.0387269	2.34444	0.659475	4.4424	0.5477	35.8611	1218.31	1.12083	1.54126	2.34444	0.577287	0.192648	0.529195	1.85e-06	7	487	c
606	363	66	10.3412	1.46099	7.45499	12.9358	561.285	558.522	23.7578	0.431005	0.690718	0.101471	0.666417	0.79528	2.62763	0.75834	36.4106	1263.44	0.948069	1.1642	0.666417	0.387171	0.320998	0.599394	0.0832512	1.59295	0.52443	2.67478	0.632363	36.375	1262.31	0.91789	1.26729	1.59295	0.522993	0.147037	0.426836	2.33e-06	9	1279	c
607	756	109	15.0301	3.49928	4.39633	19.7688	704.363	564.616	41.0925	0.751478	-6.69e-05	0.033855	1.24621	0.915486	8.37277	0.65021	34.8942	1159.92	1.25373	1.58964	1.24621	0.4748	0.372605	0.719089	0.0232689	3.37537	0.766059	8.21414	0.49551	34.7938	1150.84	1.24738	1.75354	3.37537	0.650348	0.202231	0.570956	1.48e-06	5	4706	c
608	109	37	5.75047	1.97057	2.52988	8.89399	100.587	563.146	19.2462	0.922203	-1.20079	0.0889847	1.09189	0.695992	2.79583	0.683943	39.7784	1515.77	0.923807	1.2424	1.09189	0.463226	0.240153	0.536262	0.0854222	2	0.445212	2.80249	0.599964	39.4933	1496.16	0.880548	1.25017	2	0.554592	0.206804	0.500506	9.4e-07	1	146	c
609	528	92	12.9702	2.78845	8.72018	19.4164	424.925	580.289	32.8393	0.720001	-1.51638	0.0372237	1.16101	0.885013	6.04844	0.683766	36.6404	1274.56	1.20705	1.526	1.16101	0.469097	0.363075	0.701307	0.0277441	2.73684	0.728913	6.04789	0.540584	36.6009	1271.56	1.1876	1.64574	2.73684	0.607093	0.220477	0.578696	2.35e-06	9	5897	c
610	388	75	11.3206	3.80357	5.70757	18.0891	399.825	583.001	36.6179	0.921798	-1.36199	0.0916571	1.36306	0.685125	3.16445	0.675178	36.0611	1237.11	0.992364	1.30678	1.36306	0.501809	0.240252	0.547814	0.0802456	3.06329	0.231159	2.99215	0.583068	35.8228	1223.48	0.914758	1.38223	3.06329	0.637227	0.0894945	0.348514	2.26e-06	9	5897	c
611	638	116	15.4161	6.52252	2.27392	25.5268	504.679	589.828	52.7317	0.93869	0.940642	0.0854648	0.717327	0.772363	2.57559	0.730676	39.4989	1489.95	0.971478	1.21108	0.717327	0.391595	0.285822	0.576428	0.0611946	1.61368	0.508717	2.64231	0.589681	39.4769	1489.17	0.951417	1.3424	1.61368	0.517674	0.102801	0.367955	2.4e-06	9	910	c
612	379	69	10.6188	2.00189	7.45042	14.2046	176.68	588.554	28.3291	0.750225	0.00112074	0.058469	1.65046	0.816814	5.50489	0.630539	35.0343	1165.88	1.1298	1.47316	1.65046	0.534098	0.28037	0.617612	0.0419191	4.91071	0.500532	5.91595	0.486916	35.0536	1167.22	1.10555	1.60171	4.91071	0.700848	0.126552	0.441112	1.3e-06	5	641	c
613	500	76	12.4459	2.33886	8.57301	16.8655	35.056	597.936	32.8516	0.785991	-0.533805	0.0742822	0.612955	0.840537	2.92194	0.742345	38.9095	1443.42	1.01038	1.21869	0.612955	0.362012	0.352317	0.637321	0.0475773	1.61348	0.596613	2.99992	0.575863	38.782	1434.5	0.991614	1.38233	1.61348	0.508879	0.139011	0.431954	7.08e-07	3	612	c
614	417	74	11.4281	2.4452	7.21589	16.0965	254.761	597.752	31.2585	0.800406	0.764874	0.0431728	1.04688	0.855502	4.62246	0.666039	36.4297	1257.52	1.1582	1.45361	1.04688	0.445826	0.350642	0.678976	0.0301639	2.57925	0.64839	4.66777	0.507282	36.0951	1234.82	1.12751	1.60293	2.57925	0.58874	0.173243	0.512018	1.6e-06	5	467	c
615	502	100	13.0092	3.96374	6.24501	21.6218	483.27	602.369	37.5999	0.8545	0.844173	0.0470001	1.24277	0.863159	5.54093	0.658174	35.7065	1210.19	1.16279	1.47205	1.24277	0.482854	0.34233	0.67495	0.0351227	3.11084	0.637021	5.28516	0.523235	35.4096	1189.05	1.13108	1.58866	3.11084	0.640147	0.160375	0.491874	2.4e-06	9	3286	c
616	325	61	9.8443	1.60734	7.45136	13.2905	594.775	599.233	24.6321	0.660986	-1.3496	0.0421653	1.64676	0.768624	4.55863	0.622525	33.3978	1053.63	1.13257	1.51888	1.64676	0.531938	0.247954	0.59113	0.0307355	4.05109	0.428461	4.54402	0.476742	33.3066	1048.49	1.08288	1.61844	4.05109	0.677099	0.0967916	0.389593	2.49e-06	9	1688	c
617	325	68	9.53509	2.11403	4.22123	13.1158	687.353	597.929	25.6968	0.720504	0.129089	0.0485428	1.0339	0.8404	4.23903	0.67322	35.9	1221.81	1.11653	1.40853	1.0339	0.448517	0.327041	0.650732	0.0405235	2.49425	0.591767	4.05494	0.54503	35.6054	1202.02	1.07572	1.49211	2.49425	0.598887	0.159117	0.476822	1.82e-06	11	4706	c
618	368	75	10.4806	3.10666	3.41344	15.8172	571.356	609.251	29.9388	0.769912	1.52354	0.0390031	1.5168	0.899482	8.54491	0.639616	34.4698	1135.1	1.20668	1.54538	1.5168	0.512898	0.340946	0.685679	0.0307649	3.63851	0.756349	8.46665	0.490669	34.0709	1107.71	1.18505	1.639	3.63851	0.665546	0.20875	0.563484	2.45e-06	8	1688	c
619	153	36	6.59268	0.64271	5.34489	7.66022	243.218	612.062	16.0553	0.598131	0.868895	0.0649878	2.50459	0.624881	4.33839	0.591946	33.9761	1095.44	1.04308	1.42471	2.50459	0.60319	0.170819	0.483356	0.0553497	4.01739	0.251268	3.6828	0.48159	33.6522	1075.61	0.958196	1.40507	4.01739	0.657961	0.0846428	0.341736	1.46e-06	5	180	c
620	524	95	12.7798	3.46946	4.9638	19.3325	385.163	626.655	36.1004	0.78084	0.859502	0.0414336	1.22211	0.836895	4.74638	0.642947	37.3601	1326.2	1.13261	1.47284	1.22211	0.473607	0.294662	0.631579	0.0293113	3.40816	0.555807	4.83636	0.483985	37.1134	1308.09	1.11126	1.61964	3.40816	0.650291	0.110502	0.415425	1.92e-06	6	1080	c
621	432	69	11.4153	1.83901	8.14129	14.9615	675.665	622.066	27.3252	0.568631	-0.999029	0.0754898	1.09159	0.767477	3.34728	0.690423	34.1184	1101.62	1.05294	1.34004	1.09159	0.460818	0.289925	0.604282	0.0596129	2.18649	0.548458	3.42113	0.590876	34.1703	1106	1.02658	1.40737	2.18649	0.565128	0.153802	0.457191	1.87e-06	10	516	c
622	342	61	10.1106	1.72911	7.19734	13.251	607.795	629.496	25.1546	0.666781	-0.898368	0.107771	0.619427	0.720321	2.10739	0.758964	28.6608	775.667	0.878523	1.08553	0.619427	0.370813	0.255658	0.522056	0.101749	1.05208	0.483595	2.01866	0.672978	28.7465	782.097	0.83462	1.14395	1.05208	0.442016	0.132913	0.387682	2.28e-06	10	3150	c
623	432	64	11.3111	0.805723	8.97765	12.7526	557.992	639.109	25.4195	0.409658	-1.0037	0.0455203	1.25558	0.860418	5.49765	0.678365	34.5099	1127.84	1.17669	1.5009	1.25558	0.481692	0.342372	0.679747	0.0370545	2.66138	0.687018	5.25164	0.546034	34.4921	1126.76	1.13919	1.56755	2.66138	0.612658	0.189205	0.52852	2.18e-06	6	3150	c
624	393	75	10.7374	2.29098	6.61465	15.4361	404.977	644.175	28.2414	0.687326	1.08557	0.0256044	2.03964	0.849645	7.78272	0.574267	33.7114	1077.28	1.2739	1.68909	2.03964	0.560407	0.295901	0.666167	0.0201704	5.17538	0.585981	7.25018	0.423887	33.2923	1048.38	1.22125	1.78135	5.17538	0.727228	0.12578	0.461151	1.83e-06	6	1080	c
625	348	60	10.1334	1.44737	7.07711	12.9133	222.254	646.974	25.4198	0.676588	-0.419816	0.052651	1.27916	0.809087	4.35012	0.670053	35.3834	1185.5	1.12877	1.4471	1.27916	0.48839	0.302404	0.634694	0.0385566	3.02341	0.535085	4.25157	0.520691	35.3378	1182.51	1.09564	1.57466	3.02341	0.624661	0.139128	0.45803	1.06e-06	5	1094	c
626	200	47	7.64531	1.33149	5.29048	10.3754	680.097	646.756	19.464	0.675126	-0.807844	0.0453452	1.53911	0.805654	4.9597	0.617499	36.7905	1286.75	1.11904	1.48864	1.53911	0.513358	0.256311	0.595351	0.0300069	4.02469	0.508826	5.09701	0.442711	36.7901	1285.7	1.10628	1.63133	4.02469	0.664034	0.110318	0.41645	1.58e-06	7	2584	c
627	457	84	11.9398	3.50625	5.82002	18.1631	640.756	669.72	36.1023	0.877471	-1.33785	0.1209	0.634581	0.720315	2.13446	0.760428	38.1165	1392.18	0.856936	1.05996	0.634581	0.378266	0.254728	0.515869	0.10026	1.19271	0.392233	1.98122	0.653646	38.0469	1389.39	0.809078	1.10421	1.19271	0.469759	0.0746483	0.286462	1.56e-06	4	718	c
628	590	81	13.3831	1.71707	9.98734	16.6212	255.367	26.1894	31.9269	0.593918	1.47042	0.0421002	1.05543	0.887115	5.67482	0.680709	32.0802	971.382	1.19756	1.50558	1.05543	0.452472	0.364478	0.699159	0.0277885	3.10256	0.665614	5.6392	0.503667	31.6746	945.499	1.17793	1.69072	3.10256	0.630811	0.16009	0.504863	1.28e-06	3	18166	c
629	797	94	15.5731	2.26388	11.1327	20.1743	372.496	54.8755	38.9303	0.697026	1.48008	0.0431677	0.866556	0.916793	6.20725	0.711521	31.1414	915.969	1.20803	1.4785	0.866556	0.422358	0.414466	0.733732	0.0274173	2.35584	0.769444	6.10902	0.543992	30.8284	896.28	1.19398	1.66776	2.35584	0.578657	0.217837	0.578642	1.14e-06	7	18166	c
630	222	53	8.41407	2.24302	4.9927	12.4189	142.41	45.4088	25.1994	0.881311	-0.530285	0.0599043	1.01006	0.758452	3.09081	0.665357	35.0528	1166.69	1.00377	1.3002	1.01006	0.435987	0.242103	0.548654	0.0456488	2.44199	0.455983	3.24441	0.510807	35.0166	1166.28	0.961505	1.41467	2.44199	0.58053	0.103539	0.378326	1.63e-06	8	389	c
631	511	81	12.6142	2.7002	7.82199	17.5386	208.777	76.3445	34.6159	0.817094	1.08585	0.110272	0.518187	0.78423	2.20079	0.778861	29.0274	796.161	0.887112	1.06383	0.518187	0.344553	0.314801	0.572688	0.0737118	1.21445	0.52046	2.26627	0.64699	28.8322	785.001	0.883093	1.21336	1.21445	0.469246	0.112968	0.367719	1.81e-06	7	18166	c
632	381	79	10.3915	2.6479	3.43187	15.1826	154.284	80.7991	28.6819	0.743015	0.136217	0.0453543	1.10231	0.858556	4.89663	0.661324	33.5965	1068.58	1.12967	1.43921	1.10231	0.457744	0.325401	0.654526	0.0309675	3.15385	0.626314	5.21991	0.500313	33.2372	1045.13	1.12166	1.60439	3.15385	0.635685	0.142058	0.466437	2.01e-06	11	1539	c
633	783	113	15.6206	2.74067	10.3033	22.3846	278.578	95.0342	38.5718	0.683004	-0.183979	0.0496624	0.91294	0.832964	3.73276	0.68355	33.6784	1071.57	1.09686	1.38376	0.91294	0.423767	0.310357	0.631276	0.0305774	2.63982	0.555898	3.97209	0.504505	33.5007	1060.15	1.08308	1.57912	2.63982	0.600031	0.106797	0.403968	1.61e-06	7	18166	c
634	490	87	11.9392	2.55334	6.09629	17.4525	37.8003	101.137	31.3089	0.716814	1.39509	0.0840836	0.569137	0.850267	2.90051	0.764546	36.2461	1250.36	0.985224	1.17855	0.569137	0.35816	0.370888	0.644424	0.0550742	1.66908	0.577886	2.97705	0.598196	35.9976	1232.23	0.983476	1.37039	1.66908	0.520874	0.136543	0.426553	6.83e-07	1	1405	c
635	477	82	12.4515	3.50813	5.65417	18.7114	253.616	121.589	36.6938	0.856003	0.219097	0.154746	0.412969	0.764238	1.87582	0.822184	28.3914	763.802	0.810344	0.952825	0.412969	0.316409	0.341587	0.569773	0.106518	0.815271	0.568681	1.94509	0.707635	28.2389	753.98	0.83426	1.07834	0.815271	0.407957	0.169978	0.426063	1.76e-06	5	18166	c
636	592	92	13.2521	3.60874	4.25289	20.1198	182.137	127.863	38.003	0.819435	0.0179176	0.207505	0.318223	0.701444	1.53294	0.848504	30.1496	869.237	0.69754	0.802221	0.318223	0.278341	0.311322	0.506022	0.154202	0.59	0.438043	1.52495	0.7482	29.986	859.777	0.689803	0.887961	0.59	0.356347	0.0994876	0.297951	2.25e-06	8	3899	c
637	711	113	14.8778	4.01173	7.30188	23.3395	324.156	144.047	42.5118	0.816865	0.292039	0.0440177	0.969766	0.860751	4.48212	0.675555	32.6077	1002.48	1.15106	1.44267	0.969766	0.434588	0.343286	0.670833	0.029554	2.6595	0.609943	4.40913	0.495659	32.2694	981.41	1.11764	1.61194	2.6595	0.589523	0.135205	0.456546	1.62e-06	4	18166	c
638	464	71	11.8487	1.63258	8.47604	14.7705	108.132	159.529	28.9307	0.655915	-1.50477	0.11478	0.636152	0.738764	2.21758	0.76449	26.6	664.347	0.907344	1.11759	0.636152	0.377243	0.282468	0.554623	0.075591	1.32648	0.472717	2.25784	0.622925	26.3753	653.081	0.892459	1.25188	1.32648	0.482131	0.103062	0.35663	1.92e-06	9	1016	c
639	517	93	12.5961	3.47319	4.69342	19.8339	329.279	179.126	34.1071	0.709475	0.225974	0.118597	0.493951	0.779068	2.11788	0.784587	27.2346	697.87	0.892782	1.06083	0.493951	0.337258	0.32793	0.583428	0.089344	1.04545	0.516324	2.08074	0.651818	27.15	694.815	0.852901	1.17349	1.04545	0.43758	0.125856	0.381858	1.6e-06	3	18166	c
640	725	116	14.4366	2.77613	6.64684	18.9639	207.34	184.166	36.9169	0.652068	0.806395	0.0900065	0.573017	0.915963	4.40933	0.759303	35.7576	1218.17	1.04299	1.23311	0.573017	0.356614	0.421678	0.694678	0.0526285	1.61526	0.770705	4.52224	0.592331	35.5453	1201.93	1.05678	1.43733	1.61526	0.514954	0.218292	0.544848	2.09e-06	7	2538	c
641	536	73	12.693	0.980736	10.5204	14.9797	285.712	183.836	29.1395	0.533401	-0.500973	0.0543171	1.00698	0.845649	4.26198	0.696726	33.1546	1038.82	1.1112	1.40307	1.00698	0.450343	0.331691	0.653909	0.0364945	2.56291	0.609506	4.28163	0.548425	32.7969	1015.43	1.09735	1.55228	2.56291	0.600171	0.144335	0.463176	1.63e-06	5	741	c
642	362	78	10.6757	2.15412	5.90337	14.3501	235.186	195.154	27.2521	0.66723	-0.594679	0.0353637	1.35398	0.883381	6.80511	0.631431	31.3494	930.037	1.21353	1.54304	1.35398	0.492609	0.359774	0.701296	0.0259332	3.8125	0.641408	6.31592	0.469489	30.4861	876.222	1.18132	1.68605	3.8125	0.666662	0.166093	0.513005	1.84e-06	3	2538	c
643	741	115	15.9586	4.9368	5.52486	24.5598	287.01	222.758	46.7779	0.878193	-0.70945	0.0382022	1.27388	0.888565	6.71579	0.669382	30.9526	905.394	1.22376	1.54964	1.27388	0.480066	0.355763	0.698994	0.0276199	3.11912	0.717064	6.51207	0.518579	30.5329	879.447	1.19833	1.69404	3.11912	0.627041	0.177835	0.530613	1.53e-06	3	8907	c
644	588	94	13.356	2.37424	9.50981	18.0987	195.302	231.667	33.6488	0.706916	-0.509382	0.077555	0.657522	0.813825	2.76587	0.737631	34.7627	1145.82	1.00755	1.22783	0.657522	0.376426	0.325406	0.616012	0.0540018	1.77691	0.491474	2.74712	0.574583	34.6693	1141.21	0.964707	1.37459	1.77691	0.525499	0.0958601	0.359515	2.06e-06	8	8907	c
645	507	93	12.8178	3.14057	6.64234	19.5322	140.988	234.963	32.3388	0.67972	-0.370528	0.0918138	0.845161	0.75019	2.69161	0.72315	34.7946	1149.47	0.978239	1.23919	0.845161	0.422266	0.272767	0.569107	0.0709135	1.81352	0.462757	2.6878	0.58637	34.7599	1148.49	0.943446	1.35141	1.81352	0.541847	0.0877964	0.341622	2.26e-06	9	3581	c
646	430	78	11.352	1.94863	7.86916	15.9285	354.892	274.346	27.7141	0.61312	-0.133886	0.107572	0.572963	0.793619	2.38812	0.769615	27.5761	716.212	0.907183	1.10358	0.572963	0.361556	0.321793	0.587422	0.0868053	1.224	0.56508	2.40716	0.674871	27.5067	713.628	0.875423	1.20004	1.224	0.48054	0.151347	0.422364	1.59e-06	4	3230	c
647	707	102	16.2702	5.59607	7.50589	25.1475	323.382	302.694	52.2397	0.933769	-0.554456	0.0557484	1.01891	0.855318	4.5212	0.698091	30.4826	874.117	1.13893	1.41972	1.01891	0.450986	0.356403	0.678045	0.0400611	2.70767	0.615565	4.52162	0.547232	30.2987	863.186	1.11299	1.56546	2.70767	0.610934	0.160657	0.489146	1.45e-06	4	3230	c
648	430	76	11.4722	3.28428	3.94338	16.9651	127.662	306.22	35.6391	0.844455	-0.191363	0.0242043	1.92119	0.910936	11.7854	0.584907	30.0851	867.657	1.33731	1.73729	1.92119	0.553555	0.35677	0.727805	0.0176735	5.58011	0.745086	11.9451	0.42941	29.5083	832.391	1.32689	1.88674	5.58011	0.743018	0.20243	0.588382	2.06e-06	2	668	c
649	799	101	15.3735	2.54858	8.57644	19.5684	337.093	327.131	36.5954	0.562669	-0.131408	0.0638763	0.661146	0.8554	3.28613	0.728254	34.5499	1130.57	1.05226	1.26928	0.661146	0.37135	0.36793	0.660126	0.040934	1.76923	0.629572	3.38809	0.557672	34.4098	1121.54	1.03683	1.44741	1.76923	0.522272	0.153973	0.463155	1.52e-06	7	3230	c
650	781	96	15.3966	2.46004	10.0175	19.3029	376.984	333.839	39.4634	0.736592	1.27005	0.076526	0.677048	0.855983	3.35059	0.753284	33.8605	1087.1	1.02187	1.23704	0.677048	0.387237	0.366939	0.653031	0.0537537	1.72779	0.614546	3.24124	0.603818	33.6648	1073.88	1.00523	1.38094	1.72779	0.532978	0.142624	0.437148	1.69e-06	6	5188	c
651	724	96	15.1595	3.42015	9.42686	21.3437	307.271	357.084	43.5023	0.831073	-1.05064	0.0335255	1.80506	0.896116	9.68786	0.614902	26.9894	692.852	1.30075	1.67009	1.80506	0.547208	0.36728	0.72683	0.0247627	5.50621	0.674233	9.45114	0.46384	26.587	668.753	1.27975	1.80725	5.50621	0.738111	0.195806	0.569632	1.25e-06	4	791	c
652	607	97	13.4101	3.56238	4.48976	19.278	167.066	367.688	37.35	0.763966	1.16599	0.0742551	0.821602	0.80718	3.13049	0.718751	34.8544	1152.04	1.02627	1.27537	0.821602	0.416184	0.312833	0.613875	0.0495141	2.02657	0.541187	3.20849	0.570907	34.5655	1132.94	1.0075	1.43041	2.02657	0.560319	0.109034	0.389961	1.78e-06	4	669	c
653	332	61	9.86363	1.25806	7.21643	12.4081	46.5023	364.077	24.1079	0.610097	0.0893453	0.0469312	1.14988	0.855264	4.97232	0.665732	32.5831	1001.89	1.16423	1.47056	1.14988	0.470233	0.34939	0.680756	0.0395418	3.48375	0.559737	4.95645	0.517565	32.0903	971.5	1.11998	1.58763	3.48375	0.66181	0.147148	0.47211	1.77e-06	8	882	c
654	600	95	13.6135	2.37957	8.49706	18.5526	332.458	375.877	34.7764	0.717172	-1.0211	0.0633635	1.21512	0.835472	4.69274	0.670407	31.1123	914.168	1.10205	1.40498	1.21512	0.481316	0.314204	0.638508	0.0482731	3.24419	0.540387	4.52926	0.51885	30.7093	889.403	1.06928	1.53294	3.24419	0.643559	0.108546	0.401664	1.48e-06	5	5188	c
655	218	60	8.51678	3.20235	1.32014	13.9884	357.553	367.138	28.4364	0.897147	-0.124612	0.146273	0.434954	0.742623	1.84497	0.796715	32.088	981.918	0.799496	0.94238	0.434954	0.31533	0.301718	0.533435	0.102318	0.941176	0.506191	1.95298	0.677647	32.1529	984.619	0.820074	1.10341	0.941176	0.429064	0.121461	0.364656	1.67e-06	5	5188	c
656	282	75	9.95373	3.50877	3.70026	17.0419	412.172	377.935	31.8632	0.903743	1.42172	0.0233019	3.51548	0.801075	9.83619	0.463641	29.03	801.787	1.28186	1.74343	3.51548	0.652634	0.269391	0.647199	0.0224146	12.1233	0.359221	10.4599	0.32762	28.5727	773.599	1.22524	1.77026	12.1233	0.886481	0.165579	0.523013	1.65e-06	6	5188	c
657	789	113	16.7808	5.26026	6.61787	26.4058	414.863	424.309	50.7058	0.896462	1.2589	0.0640433	0.6375	0.883549	3.73721	0.751385	34.9037	1155.01	1.0703	1.28416	0.6375	0.376265	0.399076	0.687624	0.041642	1.7311	0.694132	3.82982	0.594345	34.6032	1134.35	1.0658	1.45365	1.7311	0.528548	0.197573	0.522394	1.66e-06	5	1209	c
658	500	78	12.7173	3.23141	7.13127	18.3913	102.831	435.491	36.3196	0.849474	0.716472	0.138954	0.560582	0.735596	2.06009	0.777221	25.5223	611.192	0.874576	1.05313	0.560582	0.357675	0.292927	0.550743	0.0926348	1.26291	0.417284	2.08364	0.638304	25.4319	607.438	0.848068	1.20091	1.26291	0.476789	0.0891147	0.325522	2.29e-06	6	13983	c
659	452	74	12.1693	1.65648	9.20135	15.2516	55.672	445.6	30.1899	0.647551	-0.422512	0.0912504	0.723002	0.784719	2.6792	0.729286	30.1239	857.187	0.948647	1.19013	0.723002	0.394081	0.285405	0.571956	0.0640164	1.86072	0.491603	2.82999	0.59157	29.8162	840.294	0.922651	1.34339	1.86072	0.55072	0.116567	0.391404	1.99e-06	6	13983	c
660	706	97	14.7386	2.91435	7.84982	19.6826	405.68	468.941	39.8067	0.764799	1.50143	0.0447336	1.59774	0.873297	7.30506	0.654739	28.2992	755.557	1.24496	1.59497	1.59774	0.526616	0.352993	0.703737	0.0324639	4.80189	0.618917	7.30031	0.5138	27.9969	737.249	1.22281	1.75112	4.80189	0.706978	0.176473	0.536161	1.77e-06	4	1126	c
661	595	98	13.376	2.86991	8.56605	19.1862	91.2832	469.445	36.7553	0.793686	1.26498	0.0636282	0.941682	0.8308	3.78274	0.696599	33.7871	1081.43	1.05727	1.33473	0.941682	0.437761	0.311166	0.6233	0.0449568	2.56897	0.542222	3.80591	0.536665	33.5728	1067.39	1.03455	1.48093	2.56897	0.601829	0.106271	0.391322	2.34e-06	9	13983	c
662	518	83	12.8796	2.7924	8.5302	18.7782	330.862	474.767	34.6449	0.806837	-1.11761	0.109328	0.418097	0.851061	2.40358	0.80156	28.2808	752.841	0.93771	1.07403	0.418097	0.309087	0.407049	0.649933	0.0750577	0.975169	0.64223	2.36285	0.666817	28.1716	747.152	0.919482	1.21981	0.975169	0.429429	0.180048	0.463071	1.61e-06	3	13545	c
663	398	79	11.0639	3.48785	3.33296	16.5589	123.276	501.198	34.0277	0.872139	0.990009	0.0673234	0.881379	0.771728	2.93055	0.704868	36.5959	1272.96	1.01334	1.29535	0.881379	0.424878	0.264868	0.571522	0.0421832	2.24566	0.481202	3.1643	0.54275	36.6329	1275.7	1.00586	1.46899	2.24566	0.572353	0.0842663	0.34818	2.43e-06	12	13983	c
664	601	124	14.068	4.42613	4.43975	24.0608	109.209	517.139	41.1604	0.798584	-1.2756	0.0678631	0.786106	0.807705	3.04401	0.710603	35.1261	1169.2	1.04084	1.29734	0.786106	0.401441	0.308181	0.613718	0.0478216	2.09939	0.48942	3.05589	0.548779	34.785	1147.2	1.00518	1.45873	2.09939	0.555862	0.097936	0.373469	2.46e-06	9	13983	c
665	663	99	14.2019	2.22188	10.0241	18.397	386.332	516.102	33.8276	0.514687	1.08233	0.0724262	0.59903	0.86864	3.2801	0.755238	24.1754	543.246	1.05131	1.24842	0.59903	0.363244	0.402401	0.683245	0.050191	1.48233	0.663507	3.20262	0.6128	23.924	531.555	1.02803	1.3962	1.48233	0.497951	0.199836	0.516275	1.97e-06	5	13545	c
666	567	84	13.2788	2.38556	9.09313	18.3859	160.806	524.269	34.3089	0.742537	0.558149	0.0498822	1.11468	0.838992	4.46156	0.66985	33.6498	1069.41	1.14323	1.46406	1.11468	0.461009	0.309886	0.644538	0.0333739	3.13185	0.551879	4.49442	0.510992	33.3874	1052.35	1.11501	1.62632	3.13185	0.633563	0.123734	0.439381	2.16e-06	9	13983	c
667	664	114	15.7509	6.34565	4.43684	28.1385	332.014	573.71	51.8581	0.913047	1.21391	0.0566561	0.986591	0.862373	4.58429	0.686574	31.9894	966.053	1.12356	1.39629	0.986591	0.444669	0.359619	0.676647	0.0391868	2.49911	0.633575	4.41013	0.54251	31.6892	946.554	1.10465	1.5394	2.49911	0.595935	0.157203	0.480607	1.98e-06	6	13545	c
668	439	76	11.6797	1.42575	9.02843	15.6158	101.847	563.871	26.1496	0.402939	1.54896	0.047083	1.24127	0.815976	4.37258	0.655248	33.2363	1042.64	1.1366	1.47954	1.24127	0.483079	0.293406	0.631464	0.0306136	3.24932	0.521011	4.39185	0.490384	32.8438	1017.7	1.1046	1.64014	3.24932	0.629955	0.109668	0.416286	2.36e-06	11	13983	c
669	160	52	6.78931	1.70448	2.94174	9.85471	165.281	570.511	17.5173	0.607811	-1.16268	0.0809896	0.790146	0.738338	2.50986	0.705657	37.5894	1348.62	0.937362	1.17611	0.790146	0.400952	0.258815	0.543193	0.0517467	2.35965	0.315514	2.72366	0.503148	37.3246	1329.31	0.92708	1.37371	2.35965	0.568791	0.0541911	0.271407	2.17e-06	8	13983	c
670	492	81	12.7236	3.31284	7.761	19.0279	99.1065	603.408	38.3975	0.877177	0.664597	0.0278647	1.5457	0.901354	8.83463	0.611088	30.74	896.55	1.29927	1.67693	1.5457	0.511036	0.36139	0.723004	0.0206335	4.43839	0.713618	8.74908	0.440042	30.282	867.972	1.27485	1.79342	4.43839	0.693992	0.206979	0.582264	2.19e-06	5	13983	c
671	713	108	15.731	5.65011	4.27533	25.4831	302.491	603.896	51.5427	0.907613	0.281724	0.0359778	1.29621	0.882455	6.51371	0.656823	33.1582	1041.31	1.21209	1.54955	1.29621	0.487078	0.339356	0.684957	0.0232602	3.5568	0.681513	6.5839	0.490488	33.0448	1033.03	1.19752	1.72325	3.5568	0.658586	0.15212	0.497014	1.69e-06	2	1342	c
672	489	74	12.3073	2.12705	8.50876	16.3457	321.79	633.608	31.6847	0.753654	1.09198	0.0483204	0.981918	0.862719	4.57631	0.702047	34.9008	1152.75	1.14546	1.43861	0.981918	0.439139	0.349312	0.675302	0.0351358	2.11639	0.689345	4.40633	0.55075	34.7387	1142.49	1.10859	1.56324	2.11639	0.545376	0.191875	0.531368	2e-06	9	1342	c
673	621	99	13.9179	2.67353	9.04045	19.211	425.689	696.158	32.5483	0.484283	-1.55827	0.0571612	0.734773	0.910309	5.09613	0.745616	35.2168	1177.5	1.13091	1.37071	0.734773	0.401238	0.42217	0.720956	0.0418008	1.95167	0.765545	5.16214	0.608155	34.9554	1158.9	1.12932	1.51478	1.95167	0.548558	0.24527	0.587557	1.37e-06	4	13545	c
674	544	79	13.5943	3.57872	7.85754	19.8834	218.102	695.572	40.3237	0.887073	0.888571	0.0418524	1.28578	0.879823	6.34953	0.662459	31.9311	964.318	1.20321	1.53733	1.28578	0.486324	0.343589	0.686684	0.0285256	3.25107	0.680753	6.09178	0.504407	31.53	938.348	1.17825	1.68372	3.25107	0.629773	0.161606	0.506188	1.74e-06	2	1553	c
675	616	96	13.8089	3.9875	3.45168	21.0604	339.585	731.131	36.8814	0.703924	-1.56852	0.0610269	0.738428	0.855845	3.56122	0.721903	26.5175	657.302	1.06563	1.30762	0.738428	0.393801	0.35119	0.653524	0.0404236	1.82642	0.660905	3.69307	0.56712	26.3547	649.127	1.05293	1.47351	1.82642	0.536099	0.160538	0.476221	1.98e-06	6	4274	c
676	610	80	13.7679	2.38425	9.11518	18.1635	391.856	723.625	34.763	0.735362	0.911008	0.11952	0.536617	0.757408	2.10601	0.777201	26.8165	675.849	0.894265	1.07568	0.536617	0.350625	0.304858	0.566432	0.0924768	1.13662	0.44591	2.02567	0.652026	26.6281	667.515	0.849241	1.17528	1.13662	0.458824	0.0947415	0.332133	1.78e-06	5	2843	c
677	410	70	10.9932	2.04791	5.14081	13.7685	76.6472	749.51	26.0632	0.520598	1.56206	0.0965298	0.664021	0.733765	2.24706	0.748148	28.9656	792.274	0.895165	1.11675	0.664021	0.383837	0.264613	0.537246	0.0687803	1.45588	0.425863	2.26789	0.621055	28.7853	782.879	0.870001	1.24567	1.45588	0.505971	0.0873241	0.327892	1.56e-06	4	925	c
678	628	106	14.8549	5.24836	4.1647	24.0845	340.512	774.234	43.8457	0.815343	1.27688	0.0397484	1.52908	0.806924	4.95979	0.626851	32.215	978.437	1.1646	1.53028	1.52908	0.511756	0.279655	0.626069	0.0311748	3.29434	0.538017	4.56544	0.473194	31.9509	962.057	1.1112	1.61094	3.29434	0.640498	0.11226	0.417567	1.85e-06	4	799	c
679	679	87	14.383	1.7204	11.1245	17.9603	55.3015	782.741	34.9186	0.66037	1.29266	0.0475218	1.27244	0.780764	3.90199	0.64497	32.6938	1008.14	1.1058	1.4438	1.27244	0.483794	0.265227	0.597426	0.0367469	3.38449	0.393293	3.78923	0.493466	32.3626	988.607	1.04429	1.56328	3.38449	0.644766	0.074133	0.336736	1.44e-06	5	760	c
680	355	82	11.1599	3.35768	5.64824	17.979	26.7692	804.549	32.5991	0.878277	-1.52541	0.0780161	0.827856	0.801069	3.08076	0.73244	35.252	1180.73	0.999509	1.24013	0.827856	0.416158	0.316165	0.61017	0.0620185	1.66078	0.559508	2.88514	0.613344	34.9399	1160.49	0.960411	1.33767	1.66078	0.531031	0.128611	0.409816	1.14e-06	5	1848	c
681	619	88	13.9038	2.37688	9.39542	18.9299	67.2102	816.32	36.3638	0.760559	0.718716	0.0307547	1.50473	0.896026	8.23605	0.641044	30.7868	898.471	1.27352	1.62852	1.50473	0.510571	0.358425	0.713387	0.0222012	4.09024	0.719175	8.28254	0.498968	30.4033	874.388	1.25974	1.77126	4.09024	0.689005	0.19698	0.5665	1.59e-06	5	689	c
682	554	84	12.9463	3.22075	6.167	17.983	254.417	820.724	35.4173	0.768672	-0.456961	0.0712296	0.830918	0.820955	3.32042	0.722444	24.7043	568.296	1.0433	1.29255	0.830918	0.419998	0.348349	0.648296	0.0504999	2.02259	0.591326	3.47457	0.58811	24.6304	565.229	1.02206	1.43582	2.02259	0.565357	0.171004	0.485247	1.92e-06	4	851	c
683	468	80	12.2405	3.54944	4.24514	18.5384	161.834	828.107	36.5832	0.85226	-1.29553	0.0379679	1.4119	0.855149	5.87362	0.626316	33.3484	1052.43	1.18714	1.53566	1.4119	0.501795	0.311585	0.657766	0.0259481	3.95373	0.588299	5.80169	0.471623	32.8432	1019.1	1.15959	1.69393	3.95373	0.678933	0.123745	0.447478	1.92e-06	5	1118	c
684	650	90	14.1026	2.65137	6.9185	18.5604	291.798	835.932	35.4681	0.677654	0.313858	0.0761457	0.63145	0.859304	3.24402	0.754054	35.2907	1181.78	1.03532	1.24557	0.63145	0.372649	0.373365	0.659916	0.0557356	1.6193	0.618857	3.12427	0.610965	35.0684	1167.59	0.99921	1.38653	1.6193	0.521947	0.155357	0.456379	1.9e-06	5	4291	c
685	760	97	15.3617	2.9337	11.0141	21.6602	322.81	854.908	40.5252	0.773363	0.292003	0.0499363	0.771967	0.902294	4.95046	0.707741	34.3445	1116.74	1.15254	1.40612	0.771967	0.397285	0.392364	0.704696	0.0354078	2.19795	0.726081	5.01204	0.547077	34.1921	1106.62	1.13506	1.57276	2.19795	0.571174	0.190294	0.530679	1.86e-06	3	4291	c
686	540	82	13.3112	3.2669	6.27747	19.1462	339.901	884.146	36.8194	0.823617	1.0764	0.11734	0.45328	0.81837	2.24782	0.794831	29.9473	847.679	0.910423	1.06499	0.45328	0.323945	0.366384	0.616275	0.0880636	0.952703	0.611306	2.22552	0.688514	29.7095	834.856	0.884004	1.18017	0.952703	0.437277	0.164665	0.436861	1.79e-06	5	4291	c
687	518	89	13.0752	3.71683	6.69482	19.0476	183.975	905.799	38.7509	0.858884	0.838528	0.0500727	1.02616	0.820447	3.85755	0.672161	35.4458	1191.15	1.0838	1.3895	1.02616	0.445771	0.28801	0.6111	0.0326256	2.7133	0.533494	3.90811	0.504231	35.2546	1178.76	1.05169	1.55568	2.7133	0.605419	0.101836	0.392092	2.02e-06	6	1428	c
688	744	101	15.5051	3.97685	8.7571	23.5774	351.686	928.628	45.7037	0.865958	1.28842	0.0363659	1.21166	0.899565	7.03204	0.643187	32.7154	1013.16	1.24727	1.57214	1.21166	0.470385	0.368179	0.712793	0.0249166	3.48665	0.708888	6.98849	0.478113	32.5905	1004.36	1.22349	1.74735	3.48665	0.650759	0.176089	0.535138	1.75e-06	7	4291	c
689	768	108	14.7776	2.91487	5.65482	18.5356	257.339	933.73	33.8051	0.319354	0.827804	0.121669	0.39147	0.884594	2.69606	0.810506	38.1668	1391.37	0.951522	1.07725	0.39147	0.299417	0.446162	0.679205	0.0794862	0.88064	0.748594	2.75143	0.680204	38.0859	1384.2	0.963514	1.2347	0.88064	0.412994	0.250866	0.546117	2.24e-06	3	1736	c
690	442	70	11.7905	2.75034	6.97788	17.3594	230.946	935.48	33.7279	0.833899	1.18746	0.0455315	1.81132	0.867824	7.85192	0.610167	30.9495	909.86	1.21291	1.59195	1.81132	0.548434	0.320505	0.674789	0.0361943	4.83784	0.609269	7.19076	0.466507	30.3514	871.173	1.1752	1.6948	4.83784	0.720807	0.155271	0.49821	2.21e-06	5	1736	c
691	556	83	13.496	3.17938	8.08994	18.7189	216.667	959.338	37.9744	0.84845	0.983747	0.0389164	1.59452	0.803298	5.05314	0.626723	32.6595	1005.96	1.17386	1.55217	1.59452	0.521287	0.27291	0.622659	0.0268958	3.9876	0.500916	4.99492	0.468486	32.4587	992.586	1.14425	1.69908	3.9876	0.67853	0.102436	0.40939	2.17e-06	4	1428	c
692	557	81	12.9857	2.11847	9.39701	16.4747	336.002	966.008	33.8578	0.755409	0.439105	0.0462588	1.4201	0.795046	4.46443	0.631917	32.3225	984.794	1.13985	1.49369	1.4201	0.500977	0.269524	0.609955	0.0356703	3.38716	0.492656	4.33813	0.497407	32.1491	974.662	1.0895	1.5989	3.38716	0.650543	0.10267	0.39862	1.98e-06	6	588	c
693	383	74	10.9713	2.50157	6.54046	16.0361	289.172	990.814	30.1088	0.791713	1.01629	0.0268207	1.79125	0.881169	8.53696	0.582188	32.1514	981.998	1.27028	1.66351	1.79125	0.53757	0.319632	0.684781	0.0179685	5.75163	0.605667	8.29286	0.404464	31.5817	943.576	1.24763	1.84271	5.75163	0.751024	0.13027	0.475877	2.32e-06	8	2816	c
694	759	105	15.3613	3.26704	9.40737	22.4343	308.754	1015.03	39.6662	0.763772	1.15079	0.100595	0.579685	0.853671	2.98076	0.762697	36.4606	1266.03	0.98258	1.18039	0.579685	0.361275	0.357543	0.633916	0.073092	1.38003	0.650032	2.97165	0.629473	36.2891	1255.2	0.9522	1.31365	1.38003	0.495422	0.153918	0.443531	2.23e-06	8	2816	c
695	704	88	14.5623	1.37568	12.3767	18.149	256.504	1010.73	34.3003	0.573488	-1.0987	0.0369484	1.33121	0.8917	7.14593	0.671133	31.1954	919.283	1.26166	1.59989	1.33121	0.496435	0.376655	0.723908	0.0243377	3.79968	0.677293	6.8872	0.517161	30.9126	900.323	1.23809	1.76405	3.79968	0.666104	0.184264	0.548591	2.28e-06	6	743	c
696	542	84	12.8874	1.93778	9.29892	17.018	45.9119	1013.72	32.7015	0.6902	-1.27431	0.0504127	1.06624	0.887627	5.74418	0.68852	30.0074	848.321	1.19058	1.48161	1.06624	0.457878	0.384347	0.711232	0.0381827	3.16737	0.667537	5.7635	0.53395	29.6419	826.539	1.16999	1.63101	3.16737	0.640632	0.182497	0.528495	1.69e-06	9	6152	c
697	609	104	14.1097	4.41196	3.68992	21.6431	81.2837	1020.85	42.4937	0.866771	1.33879	0.0502212	1.31483	0.831273	4.89632	0.655332	31.3024	922.843	1.15985	1.50266	1.31483	0.489873	0.309282	0.650318	0.0339634	3.63687	0.546594	5.01062	0.503182	31.1378	912.331	1.13905	1.65523	3.63687	0.661687	0.126573	0.447676	1.72e-06	8	2156	c
698	552	78	12.9344	1.49302	10.7786	16.4503	98.1132	1045.54	31.2405	0.646732	1.28695	0.0547388	1.13634	0.834284	4.42858	0.694365	31.2819	921.979	1.12563	1.43287	1.13634	0.4684	0.324241	0.652407	0.0378278	3.21941	0.508922	4.2779	0.546101	30.8776	897.665	1.08212	1.55108	3.21941	0.626503	0.139976	0.456295	1.57e-06	6	2156	c
699	620	79	13.6373	1.02369	11.7243	16.4121	265.309	1042.91	31.2496	0.505378	-0.574483	0.0547633	1.43224	0.844977	5.61945	0.668246	30.6327	885.262	1.16723	1.48866	1.43224	0.506367	0.33785	0.67381	0.0370976	3.83662	0.584685	5.61894	0.52721	30.5476	879.119	1.14554	1.6419	3.83662	0.675555	0.145532	0.476627	2.25e-06	5	1136	c
700	449	68	11.5354	1.17191	9.42325	15.0481	317.714	1062.01	27.4482	0.536061	1.12788	0.0335186	1.49194	0.896264	8.19106	0.628947	30.1582	861.776	1.27043	1.62189	1.49194	0.513443	0.369321	0.72134	0.0243251	4.39433	0.687646	8.03421	0.46328	29.7088	834.086	1.24222	1.77345	4.39433	0.695867	0.189968	0.557515	2.05e-06	8	2025	c
701	658	85	14.2301	2.14032	10.1015	18.659	107.968	1074.35	34.7849	0.624404	-0.846947	0.0399995	1.33844	0.868916	6.10527	0.669904	30.0661	850.614	1.22979	1.56578	1.33844	0.486695	0.352346	0.69866	0.0275233	3.35445	0.656492	5.88265	0.51552	29.7654	832.478	1.19441	1.7071	3.35445	0.641462	0.169447	0.520547	1.43e-06	5	2156	c
702	705	91	14.7727	2.2498	11.1248	19.6187	305.925	1082.45	36.7971	0.723139	0.939062	0.0383167	1.51353	0.780119	4.44171	0.611339	33.697	1071.63	1.14891	1.53188	1.51353	0.508285	0.246171	0.591198	0.0283312	3.6266	0.44382	4.26028	0.446765	33.5465	1062.5	1.09523	1.64989	3.6266	0.654212	0.07604	0.349671	2.04e-06	7	2025	c
703	702	109	16.1213	5.7872	6.15818	25.8772	339.376	1102.21	54.1145	0.938611	0.91434	0.0529197	0.685638	0.899876	4.42395	0.729549	35.827	1215.75	1.14638	1.37448	0.685638	0.379912	0.413945	0.715546	0.0346082	1.80861	0.733587	4.39438	0.571199	35.7384	1209.43	1.13123	1.54672	1.80861	0.531436	0.212598	0.554836	1.68e-06	7	2025	c
704	522	78	12.9354	2.96657	8.20354	17.8761	266.834	1102.56	37.2225	0.854321	0.878718	0.0432678	0.701691	0.925837	5.73071	0.708201	34.8975	1153.92	1.19741	1.42693	0.701691	0.36989	0.445992	0.747761	0.0277069	1.91793	0.795942	5.69947	0.527684	34.7559	1143.67	1.18827	1.6107	1.91793	0.524574	0.247456	0.604534	2e-06	5	748	c
705	477	83	12.5921	4.05815	6.92951	19.4808	239.06	1108.91	39.4181	0.905776	0.968347	0.135474	0.681844	0.644106	1.95793	0.749151	28.1503	749.454	0.831689	1.05028	0.681844	0.388808	0.211944	0.469477	0.109903	1.33005	0.298827	1.94845	0.636453	28.1379	750.746	0.783175	1.11376	1.33005	0.491405	0.0435172	0.21986	1.9e-06	3	7494	c
706	536	76	12.7231	1.45064	10.1698	15.9565	32.271	1109.85	30.0968	0.609313	0.676927	0.239819	0.362867	0.746885	1.7168	0.843654	26.4774	665.297	0.732594	0.858017	0.362867	0.298095	0.346578	0.549651	0.221035	0.693446	0.499112	1.69222	0.762368	26.4651	665.132	0.715223	0.922598	0.693446	0.392703	0.150922	0.373916	1.17e-06	4	6152	c
707	553	85	13.1354	3.39867	6.71815	18.9499	71.3192	1123.5	38.0814	0.854691	-0.933831	0.0973314	0.518084	0.809446	2.35942	0.772043	27.1095	689.822	0.938839	1.1128	0.518084	0.338978	0.346035	0.610132	0.0678754	1.21458	0.562161	2.38702	0.629914	27.0437	687.354	0.909081	1.25105	1.21458	0.465215	0.142189	0.417469	1.28e-06	4	6152	c
708	551	84	13.1631	2.26977	9.52676	17.8245	142.985	1170.99	31.358	0.541829	-1.23862	0.0377326	1.42641	0.867509	6.38305	0.661306	31.3026	924.87	1.22333	1.56982	1.42641	0.49819	0.341267	0.689807	0.027691	3.60085	0.662721	6.33809	0.517408	30.9342	902.191	1.19466	1.69938	3.60085	0.639695	0.185587	0.541892	1.04e-06	6	7494	c
709	457	69	11.7584	1.66757	9.23229	15.0618	56.3074	1187.99	29.1644	0.678607	1.03443	0.0474539	1.02227	0.851411	4.43993	0.680022	31.9238	961.046	1.12918	1.41969	1.02227	0.447358	0.343792	0.667335	0.0320814	2.58987	0.632764	4.52617	0.525124	31.7038	947.537	1.10932	1.57302	2.58987	0.602459	0.157735	0.485938	8.35e-07	2	537	c
710	450	106	11.2831	3.46739	3.52322	18.2926	172.494	167.114	33.0418	0.792794	0.582996	0.221208	0.322702	0.647255	1.45742	0.843902	35.7786	1235.4	0.651819	0.755395	0.322702	0.278706	0.267028	0.455722	0.183873	0.620991	0.279827	1.43114	0.752478	35.5598	1222.05	0.617788	0.822761	0.620991	0.370976	0.0515222	0.206345	1.5e-06	7	11265	c
711	655	114	13.3703	3.75203	3.45018	19.8987	19.4216	170.587	36.6436	0.698164	-1.14321	0.11155	0.460298	0.809976	2.21116	0.792184	39.2031	1470.56	0.912441	1.06602	0.460298	0.325665	0.362452	0.613339	0.0689478	1.21724	0.544508	2.33618	0.641039	39.0018	1455.15	0.909489	1.25646	1.21724	0.472965	0.124376	0.391781	7.96e-07	4	6342	c
712	670	104	14.6039	3.52836	7.75881	21.0176	22.5342	381.209	40.6551	0.835512	1.16103	0.0652869	0.832058	0.805595	3.14001	0.711445	37.2573	1318.9	1.04727	1.31538	0.832058	0.415997	0.297393	0.606966	0.0405842	2.13014	0.536948	3.3001	0.546833	37.137	1310.86	1.02898	1.48629	2.13014	0.561505	0.112814	0.403491	1.12e-06	5	6773	c
713	550	91	12.6921	2.32333	7.04739	16.4074	343.567	351.617	31.6751	0.649975	-1.38724	0.119963	0.413405	0.826645	2.19237	0.80093	40.9604	1609.79	0.892446	1.02542	0.413405	0.305396	0.384197	0.621228	0.079872	0.9375	0.623051	2.24354	0.66125	40.9042	1604.99	0.892204	1.17904	0.9375	0.414539	0.168383	0.441468	1.96e-06	6	9428	c
714	508	80	12.2746	2.1028	7.54326	15.9969	300.016	325.143	31.5308	0.733881	1.45817	0.248121	0.278984	0.798661	1.69282	0.864955	36.7258	1300.23	0.701607	0.791048	0.278984	0.260867	0.38688	0.561921	0.197857	0.571744	0.583705	1.68671	0.764459	36.7483	1301.52	0.701915	0.894616	0.571744	0.358873	0.176703	0.398999	2e-06	5	9428	c
715	710	96	14.4835	3.1757	5.85378	19.5532	279.021	387.64	38.2868	0.751814	0.768119	0.0734256	0.589513	0.873789	3.33543	0.753333	37.7363	1355.45	1.0389	1.23733	0.589513	0.359095	0.386611	0.668827	0.0461122	1.48878	0.695358	3.44349	0.596951	37.508	1338.34	1.03807	1.41646	1.48878	0.498353	0.18664	0.502908	1.61e-06	6	9428	c
716	584	79	13.3876	2.23345	8.96818	17.0531	280.184	425.903	34.0751	0.747432	0.894217	0.158564	0.402651	0.716919	1.71119	0.809644	32.9154	1035.08	0.780832	0.912906	0.402651	0.306032	0.293842	0.519432	0.113502	0.877127	0.424674	1.76229	0.688469	32.9981	1040.84	0.769676	1.04423	0.877127	0.417461	0.0827233	0.293545	1.54e-06	5	1091	c
717	460	86	11.5139	2.46532	4.76696	15.7666	300.143	458.796	28.2182	0.5405	-1.37817	0.0683338	0.804309	0.793254	2.94516	0.701975	37.8648	1366.45	0.993773	1.24855	0.804309	0.404004	0.290521	0.588065	0.0463616	1.93893	0.510819	2.98181	0.55042	37.7303	1357.2	0.971492	1.39706	1.93893	0.542221	0.110403	0.388101	1.47e-06	7	6511	c
718	675	107	14.4854	2.81542	7.90391	19.1805	374.349	449.622	32.4451	0.424127	0.937342	0.0829306	0.664942	0.857632	3.3353	0.772892	36.7246	1280.81	1.05765	1.26589	0.664942	0.38328	0.402882	0.687021	0.057813	1.68197	0.638585	3.32693	0.644363	36.6241	1273.41	1.04631	1.40608	1.68197	0.508967	0.220826	0.542801	1.43e-06	9	6511	c
719	625	90	13.808	2.80755	7.30838	19.121	454.378	382.079	36.3114	0.749351	-1.10635	0.070409	0.636986	0.855594	3.20554	0.743664	38.7937	1434.99	1.02056	1.23109	0.636986	0.371114	0.369336	0.653804	0.049846	1.63303	0.600498	3.04383	0.600022	38.6642	1426.03	0.988095	1.3717	1.63303	0.519979	0.149052	0.445216	1.67e-06	9	1151	c
720	465	77	12.0013	1.89858	8.14483	15.9207	361.224	313.817	30.1582	0.697786	-0.586184	0.155284	0.462669	0.664647	1.68982	0.793357	35.3657	1199	0.772259	0.928277	0.462669	0.32769	0.24526	0.478075	0.114773	0.943152	0.310644	1.68408	0.680362	35.4548	1207.28	0.734724	1.02283	0.943152	0.431053	0.0439544	0.211961	2.19e-06	12	9428	c
721	690	102	14.1085	3.33554	5.56068	19.7439	629.055	85.1244	37.2681	0.736894	0.687901	0.162096	0.375485	0.775403	1.83591	0.828084	38.9713	1459.04	0.812782	0.940054	0.375485	0.301147	0.352059	0.575144	0.118416	0.814381	0.512417	1.83512	0.716988	38.8344	1448.62	0.806967	1.06733	0.814381	0.410203	0.132241	0.374528	1.16e-06	5	6715	c
722	512	96	12.4398	3.14615	4.17708	17.2973	586.835	88.6423	32.3807	0.646454	-0.39496	0.195914	0.395945	0.708796	1.67984	0.828282	34.5486	1145.63	0.735672	0.872369	0.395945	0.310505	0.290978	0.506951	0.144802	0.748815	0.424537	1.65062	0.725118	34.5545	1146.13	0.727297	0.965518	0.748815	0.398287	0.0919185	0.298041	1.2e-06	5	4606	c
723	735	97	15.2885	2.12851	12.398	20.8907	709.095	246.285	36.515	0.665077	0.529978	0.0776275	0.828633	0.847266	3.71267	0.742606	35.3449	1184.17	1.07906	1.32434	0.828633	0.419004	0.368081	0.670646	0.0554313	2.16174	0.586697	3.6152	0.606422	35.0855	1166.54	1.05264	1.4599	2.16174	0.566546	0.170621	0.488253	1.58e-06	5	5118	c
724	618	85	13.585	1.81478	8.27553	17.7321	775.04	239.714	32.3452	0.583539	-0.220289	0.0594225	1.0207	0.84253	4.24093	0.704946	35.0931	1166.23	1.11839	1.39788	1.0207	0.452318	0.345715	0.665193	0.0396786	2.83935	0.570101	4.30235	0.550685	35.0018	1159.89	1.09718	1.56335	2.83935	0.610308	0.140928	0.459375	1.57e-06	2	1496	c
725	724	93	14.7719	2.46133	9.54449	19.0934	817.245	230.923	37.1421	0.680413	-0.00408483	0.0753565	0.848097	0.837739	3.61337	0.715139	36.2017	1245.44	1.0472	1.28897	0.848097	0.422044	0.336423	0.637394	0.054234	2.09953	0.572995	3.45844	0.582335	36.0373	1234.97	1.00544	1.41872	2.09953	0.572302	0.122626	0.411307	1.6e-06	5	1239	c
726	720	106	14.4604	3.01154	8.31153	19.8225	808.717	193.015	38.1982	0.725607	-0.632088	0.162533	0.358736	0.772014	1.78675	0.835799	34.2413	1121.69	0.791219	0.913169	0.358736	0.295449	0.355822	0.571388	0.112528	0.719101	0.570879	1.83788	0.721348	34.0803	1109.63	0.808675	1.04965	0.719101	0.388319	0.156082	0.403493	1.54e-06	5	2586	c
727	798	105	16.263	4.3131	8.32362	23.991	767.858	176.604	47.8516	0.876333	-0.318545	0.0529738	0.84016	0.894266	4.97301	0.715737	35.9544	1226.22	1.15254	1.40906	0.84016	0.417631	0.391574	0.704593	0.039308	2.36568	0.699588	4.9374	0.561904	35.7243	1210.43	1.12591	1.56403	2.36568	0.585301	0.186943	0.52506	1.45e-06	5	2586	c
728	781	98	15.5015	2.12994	11.2151	19.6267	880.202	55.8917	38.4469	0.714157	0.76863	0.092063	0.656949	0.814238	2.76826	0.748	37.3573	1329.06	0.989114	1.20437	0.656949	0.380937	0.328144	0.613783	0.0716035	1.58211	0.499467	2.58043	0.622737	37.1246	1314.62	0.932413	1.30117	1.58211	0.517574	0.108243	0.371949	1.32e-06	7	10406	c
729	590	87	13.4091	3.12998	7.20616	18.1658	945.774	96.024	37.5309	0.811533	0.101116	0.0694508	0.775815	0.865456	3.88313	0.740897	37.6771	1351.42	1.06208	1.29939	0.775815	0.410841	0.36681	0.66495	0.0508656	1.81574	0.683958	3.87262	0.611918	37.6046	1345.93	1.04983	1.41865	1.81574	0.544386	0.187723	0.504626	1.55e-06	7	1971	c
730	599	78	13.8576	2.79914	8.80135	18.0321	1004.21	92.0179	37.0398	0.823779	0.675675	0.086698	0.724169	0.745851	2.42469	0.73411	38.3667	1405.12	0.948234	1.18713	0.724169	0.391933	0.270927	0.557369	0.0708728	1.56881	0.469035	2.47732	0.617227	38.4642	1414.11	0.917298	1.27865	1.56881	0.511876	0.111192	0.373847	1.52e-06	5	680	c
731	503	91	12.0223	2.67475	5.02764	16.5597	986.401	117.453	30.2762	0.620906	-1.53821	0.153416	0.330636	0.805317	1.84917	0.838565	40.6845	1592.81	0.812927	0.917458	0.330636	0.280408	0.391835	0.600425	0.11866	0.597156	0.638271	1.82542	0.749763	40.5213	1579.17	0.816644	1.01924	0.597156	0.360491	0.206035	0.456871	1.54e-06	7	1971	c
732	439	69	11.4874	2.16028	7.61268	15.1384	1006.75	154.435	30.6817	0.786967	1.36293	0.131965	0.421407	0.789631	2.00159	0.802508	34.1633	1112.48	0.863292	1.00042	0.421407	0.311866	0.352834	0.590403	0.110689	0.718499	0.581194	1.85779	0.711528	34.0214	1105.25	0.817043	1.05497	0.718499	0.38049	0.1584	0.40739	1.55e-06	6	3397	c
733	718	86	14.6547	0.52626	13.1241	15.6684	921.196	133.174	31.1706	0.231743	1.13812	0.0749135	0.747705	0.853159	3.54597	0.753896	36.4943	1264.55	1.06679	1.29924	0.747705	0.404652	0.387164	0.681235	0.0538149	1.68504	0.641374	3.3493	0.631914	36.2772	1249.28	1.04122	1.42386	1.68504	0.534114	0.196264	0.516187	1.56e-06	6	756	c
734	778	106	15.3733	1.80329	11.4872	19.7922	1239.14	146.302	34.6661	0.488324	-1.3048	0.154014	0.300342	0.84459	1.96629	0.855171	41.4846	1656.53	0.827857	0.925349	0.300342	0.270303	0.440324	0.63793	0.109813	0.653392	0.652549	1.94026	0.75118	41.3348	1643.65	0.831181	1.04849	0.653392	0.381461	0.206915	0.463607	1.04e-06	5	13414	c
735	670	92	14.4412	2.57781	9.67082	20.0446	1219.99	169.223	36.0518	0.715225	-1.45626	0.105914	0.441574	0.870439	2.70411	0.805922	39.6618	1503.03	0.975124	1.125	0.441574	0.323266	0.426206	0.67549	0.0817966	0.908629	0.701016	2.51953	0.687817	39.5313	1493.08	0.957911	1.23344	0.908629	0.423817	0.223476	0.516513	1.13e-06	6	13414	c
736	520	91	11.8832	2.59023	4.18974	15.7523	1110.13	161.751	29.0909	0.507084	0.420254	0.202457	0.338566	0.68612	1.53932	0.836368	36.5092	1283.36	0.710604	0.820008	0.338566	0.284366	0.287758	0.490814	0.156369	0.580866	0.460107	1.53794	0.753303	36.4305	1277.96	0.703901	0.897633	0.580866	0.356049	0.111799	0.317556	1.46e-06	7	13414	c
737	579	80	13.1127	1.43531	9.54846	15.5346	1084.07	198.203	30.0003	0.478061	0.439373	0.0874242	0.540193	0.870149	3.08005	0.777795	39.0602	1456.15	1.00273	1.18013	0.540193	0.350617	0.408837	0.674327	0.0646102	1.25049	0.690935	3.02302	0.644297	38.8442	1439.41	0.994933	1.31764	1.25049	0.478176	0.206921	0.512075	1.55e-06	6	745	c
738	674	92	14.5902	3.03288	9.09935	19.6838	1077.15	233.205	39.2394	0.807791	0.936967	0.115528	0.507498	0.786935	2.19095	0.794554	40.015	1534.59	0.89556	1.07222	0.507498	0.345661	0.330768	0.588376	0.0919395	1.05451	0.510499	2.07713	0.674887	39.8518	1524.26	0.851714	1.16207	1.05451	0.454156	0.112163	0.359132	1.61e-06	7	3167	c
739	659	90	14.7855	3.41323	9.80161	21.1787	193.286	32.6338	41.362	0.855824	0.891001	0.0614372	0.836092	0.886735	4.69087	0.747307	36.4122	1258.41	1.13493	1.37961	0.836092	0.41349	0.403404	0.70852	0.0448541	1.77625	0.747982	4.52404	0.61904	36.3373	1252.81	1.11672	1.4988	1.77625	0.534787	0.237212	0.576142	7.55e-07	5	6901	c
740	671	99	15.3591	5.34987	6.23537	23.9072	105.171	86.4878	49.2909	0.918573	0.777964	0.077607	0.672517	0.815744	2.82495	0.748464	38.229	1392.82	0.997311	1.22134	0.672517	0.384453	0.330448	0.61916	0.0590978	1.46287	0.593474	2.79923	0.644306	38.2159	1392.95	0.970514	1.32894	1.46287	0.508549	0.157209	0.450418	8.78e-07	6	2863	c
741	616	87	13.9372	3.6538	8.19388	20.0437	80.6853	110.772	41.0211	0.874304	0.269306	0.0949517	1.00259	0.763997	3.12412	0.724353	35.6157	1206.51	0.98886	1.2468	1.00259	0.448246	0.296294	0.593188	0.079069	2.05176	0.444965	2.84831	0.619262	35.5527	1202.92	0.946583	1.31295	2.05176	0.562694	0.132264	0.411931	9.11e-07	8	5131	c
742	610	96	13.2824	3.74289	3.67781	18.3322	108.854	144.129	37.3962	0.771752	-0.229909	0.23739	0.308506	0.641021	1.4297	0.846805	33.6175	1088.25	0.650138	0.744938	0.308506	0.270038	0.26348	0.449808	0.196192	0.516378	0.377715	1.4149	0.771869	33.6416	1091.04	0.628006	0.800622	0.516378	0.339794	0.080531	0.254898	9.99e-07	6	1168	c
743	394	74	10.5553	2.72888	3.46463	15.4912	62.5738	153.756	29.4379	0.785939	0.163665	0.186932	0.390701	0.75636	1.8018	0.828799	34.5628	1144.32	0.776707	0.910559	0.390701	0.307612	0.327693	0.547837	0.158104	0.667674	0.517959	1.69255	0.749547	34.6435	1150.88	0.749838	0.96509	0.667674	0.383858	0.134151	0.359969	9.61e-07	9	5131	c
744	563	79	12.9553	1.49952	10.1171	15.5091	99.0623	235.797	31.4927	0.656181	0.0275198	0.101651	0.782814	0.806914	3.02711	0.756135	36.0699	1237.47	0.996401	1.22636	0.782814	0.411839	0.353215	0.639595	0.0825573	1.5551	0.582399	2.86195	0.667942	35.8531	1223	0.965997	1.31545	1.5551	0.523384	0.182797	0.482208	1.05e-06	2	631	c
745	600	86	13.5392	2.5923	9.17995	18.1343	34.5006	221.165	36.5626	0.801603	-0.051449	0.125229	0.669778	0.863952	3.46154	0.77479	34.54	1135.75	0.975506	1.17623	0.669778	0.38789	0.386273	0.65617	0.102482	1.63738	0.658953	3.40052	0.66429	34.4299	1128.46	0.956104	1.29241	1.63738	0.52671	0.191112	0.488852	9.01e-07	6	1490	c
746	452	86	11.7427	2.49833	7.10191	17.0524	46.9196	239.795	32.5527	0.799698	0.284766	0.0742238	0.932051	0.868468	4.54305	0.716451	34.3175	1118.39	1.07373	1.31977	0.932051	0.437013	0.384463	0.682953	0.0557726	2.30971	0.650352	4.30291	0.578433	34.0787	1101.75	1.0508	1.44637	2.30971	0.58805	0.194683	0.517669	9.68e-07	5	1490	c
747	434	78	11.4848	2.78249	5.50866	16.2745	79.6141	306.614	28.8877	0.595244	-0.628503	0.207644	0.348371	0.671823	1.53077	0.837093	35.2644	1196.64	0.697651	0.814557	0.348371	0.290726	0.272831	0.476336	0.177677	0.587912	0.431574	1.51714	0.755495	35.2033	1193.84	0.672725	0.869287	0.587912	0.360342	0.099672	0.295218	1.06e-06	6	2383	c
748	655	109	14.8876	4.43629	8.21884	23.6565	160.378	379.525	45.2404	0.890734	-1.53994	0.0607897	0.924969	0.859305	4.28715	0.711685	38.565	1416.51	1.09121	1.3683	0.924969	0.437891	0.340023	0.655063	0.0514645	2.07091	0.645746	3.92292	0.59672	38.34	1400.82	1.04124	1.44398	2.07091	0.559032	0.172714	0.488756	1.11e-06	6	1186	c
749	476	71	12.1151	1.88103	8.50492	15.4727	189.348	384.738	30.9305	0.744912	-0.647648	0.0665766	1.06303	0.763967	3.25186	0.688672	37.188	1314.77	1.03795	1.3315	1.06303	0.454811	0.269	0.582142	0.0618764	2.23571	0.501113	3.2407	0.591619	37.1929	1317.58	0.987192	1.39232	2.23571	0.577388	0.123024	0.408446	1.09e-06	5	1419	c
750	602	103	14.25	5.13131	4.28995	22.4256	212.759	371.143	47.0665	0.911433	1.43221	0.100112	0.516809	0.809893	2.35926	0.777095	39.5459	1495.48	0.938119	1.11362	0.516809	0.34267	0.347643	0.611653	0.0752197	1.19298	0.547725	2.31887	0.662883	39.4386	1488.82	0.906276	1.24087	1.19298	0.477317	0.131374	0.400132	1.07e-06	3	1419	c
751	748	113	16.5131	6.14184	6.37989	27.3566	290.637	329.962	54.2085	0.926491	0.310437	0.0672147	0.829041	0.830639	3.44755	0.726328	38.2024	1388.34	1.06245	1.32082	0.829041	0.414383	0.338789	0.645381	0.051191	1.79753	0.614318	3.33032	0.611162	38.0696	1379.81	1.02518	1.42961	1.79753	0.535027	0.176245	0.491348	1.15e-06	4	1209	c
752	521	84	13.0908	3.586	5.9379	19.0175	315.957	301.706	38.1313	0.872031	0.394702	0.198563	0.440248	0.699171	1.73173	0.818986	34.5665	1145.02	0.765164	0.919106	0.440248	0.325558	0.284277	0.512407	0.156785	0.881818	0.428327	1.77126	0.72	34.5364	1142.93	0.761708	1.02842	0.881818	0.430631	0.101129	0.32211	1.17e-06	4	1267	c
753	568	88	13.766	4.41565	6.15235	20.8051	325.057	265.362	43.0322	0.9063	0.453184	0.172657	0.415714	0.654842	1.60221	0.811	36.289	1265.89	0.737781	0.879973	0.415714	0.314058	0.245616	0.467319	0.145509	0.728421	0.373614	1.58145	0.736842	36.3411	1272.7	0.688494	0.930221	0.728421	0.397977	0.0848152	0.281226	1.14e-06	5	933	c
754	560	87	13.9039	4.58057	5.44664	21.5889	352.412	252.259	44.3616	0.920612	0.512266	0.0697929	1.38764	0.780605	4.16242	0.684153	35.5755	1200.81	1.08568	1.39645	1.38764	0.500415	0.286131	0.610464	0.0523937	3.14792	0.473453	3.98921	0.558757	35.3438	1184.2	1.05978	1.50351	3.14792	0.635287	0.117641	0.413916	1.18e-06	6	621	c
755	767	112	16.0061	4.23246	6.15554	23.6038	397.55	198.379	44.2749	0.828475	0.791741	0.127568	0.429766	0.823808	2.2196	0.81314	40.3308	1559.59	0.895475	1.0443	0.429766	0.321309	0.388891	0.629269	0.0929505	0.938144	0.613244	2.21284	0.698614	40.3255	1559.03	0.890464	1.16732	0.938144	0.432059	0.186369	0.461844	1.26e-06	4	4660	c
756	651	86	14.1643	1.7543	10.6095	17.8587	422.317	178.12	33.6938	0.646993	0.896739	0.208977	0.368053	0.683473	1.58139	0.834747	37.058	1322.6	0.717406	0.843113	0.368053	0.298688	0.296908	0.504677	0.185031	0.519298	0.498302	1.51754	0.786667	37.1965	1334.01	0.693679	0.868573	0.519298	0.344058	0.157151	0.371062	1.31e-06	4	4660	c
757	366	79	11.6034	4.36726	3.95334	18.747	464.733	134.385	37.9319	0.92734	0.824235	0.128445	0.473485	0.744981	1.92833	0.79053	35.3992	1197.58	0.839982	1.00158	0.473485	0.331219	0.30885	0.553515	0.115657	0.796429	0.555383	1.89563	0.700357	35.3821	1197.89	0.811813	1.06664	0.796429	0.400135	0.159524	0.410872	1.32e-06	9	4660	c
758	311	59	9.60646	1.85059	6.03126	12.6345	480.058	126.66	23.5004	0.596379	0.595192	0.133334	0.479754	0.733025	1.8985	0.79287	35.6928	1218.48	0.830709	0.995315	0.479754	0.334089	0.297074	0.541647	0.0999	0.92549	0.521119	1.96631	0.678431	35.6549	1216.22	0.822723	1.11137	0.92549	0.418497	0.140193	0.392768	1.3e-06	8	4660	c
759	462	86	11.432	2.917	3.00363	16.11	420.073	66.9538	30.9745	0.715811	0.939227	0.107563	0.599057	0.781387	2.37013	0.772642	40.7075	1589.25	0.903404	1.10663	0.599057	0.368688	0.325214	0.591054	0.086762	1.12564	0.544322	2.23513	0.66451	40.5974	1583.79	0.848551	1.17084	1.12564	0.463881	0.149071	0.414582	1.11e-06	4	695	c
760	499	83	13.1148	4.14177	6.56422	20.0936	356.714	42.9846	40.7082	0.917252	1.07356	0.0786543	0.80497	0.792292	2.93774	0.731713	38.6224	1423.07	0.990971	1.23835	0.80497	0.415816	0.308536	0.602908	0.052817	1.63593	0.569093	2.89824	0.600556	38.5674	1418.51	0.983433	1.36892	1.63593	0.519339	0.130501	0.417089	8.97e-07	6	6901	c
761	577	97	13.2904	2.8597	7.48412	19.7051	283.86	49.3959	35.4463	0.78005	0.950826	0.120819	0.640486	0.864228	3.35869	0.761103	38.5292	1421.31	0.945762	1.14231	0.640486	0.380581	0.366233	0.633073	0.111922	1.53024	0.652261	3.20027	0.642896	38.3931	1411.6	0.918721	1.21229	1.53024	0.520924	0.168052	0.446563	8.67e-07	6	6901	c
762	323	69	9.83355	2.21379	4.86875	14.7813	636.851	17.4212	25.8386	0.708885	-1.33708	0.0971415	1.08034	0.860067	4.86021	0.697536	33.8393	1090.77	1.03057	1.28987	1.08034	0.463749	0.359033	0.656747	0.0723012	3.29391	0.603657	5.15537	0.550731	33.8244	1088.04	1.04161	1.41459	3.29391	0.64761	0.179231	0.49303	6.2e-07	3	3073	c
763	679	98	14.5524	3.05713	7.71381	20.4972	652.577	35.5067	37.4064	0.713853	0.91664	0.103278	0.640975	0.84776	3.10515	0.753598	36.4915	1268.21	0.989001	1.1918	0.640975	0.378525	0.367509	0.644411	0.0787204	1.59832	0.593652	2.96669	0.619086	36.4286	1264.27	0.960204	1.30657	1.59832	0.525995	0.151762	0.439445	6.86e-07	4	3073	c
764	730	100	15.3778	3.99822	8.48757	22.9504	682.874	47.7655	44.3577	0.85346	1.50258	0.0864644	0.670062	0.869242	3.56221	0.751401	36.1768	1243.81	1.04523	1.25648	0.670062	0.38665	0.395712	0.679684	0.0617031	1.66304	0.658383	3.43407	0.615515	35.8898	1223.7	1.02396	1.40254	1.66304	0.530752	0.182267	0.495151	6.99e-07	3	3073	c
765	444	74	11.7938	2.79765	6.1147	16.8847	705.493	41.05	32.7989	0.817373	1.05393	0.133539	0.432564	0.795277	2.05646	0.807776	39.079	1463.94	0.867131	1.01555	0.432564	0.32043	0.348903	0.59074	0.105635	0.812665	0.572153	1.94971	0.704485	38.9077	1453.08	0.827602	1.08575	0.812665	0.404001	0.156886	0.410806	6.29e-07	3	3073	c
766	530	78	12.7568	2.8883	7.95741	18.0167	740.332	32.5129	36.0406	0.835944	0.202009	0.104834	1.04135	0.790464	3.4849	0.713372	34.7791	1150.19	0.996126	1.24933	1.04135	0.457219	0.302414	0.599377	0.0816525	2.37719	0.476044	3.26851	0.592268	34.5965	1137.89	0.963287	1.34167	2.37719	0.587445	0.108667	0.377989	4.99e-07	3	638	c
767	566	79	12.9909	1.32531	10.3336	15.8964	742.863	173.088	30.1206	0.567157	0.633922	0.141869	0.42837	0.772225	1.94034	0.809488	32.0066	974.152	0.848606	0.991939	0.42837	0.319424	0.344176	0.581306	0.110838	0.896761	0.507859	1.91108	0.711943	31.9413	971.219	0.821015	1.09493	0.896761	0.430794	0.152987	0.407291	8.41e-07	4	3231	c
768	628	86	13.9796	2.93724	7.21291	18.8662	735.89	198.412	37.4471	0.807605	0.72852	0.102249	0.631668	0.771802	2.38404	0.757773	37.3277	1329.07	0.938599	1.14768	0.631668	0.376271	0.304252	0.581004	0.0766959	1.54025	0.431848	2.35549	0.62846	37.2397	1324.53	0.899046	1.26	1.54025	0.510937	0.106998	0.36436	9.33e-07	4	3231	c
769	427	69	11.7052	2.97748	7.27867	16.3847	743.86	241.058	33.9011	0.86366	0.561618	0.0814354	0.765635	0.841392	3.41361	0.717246	37.0019	1303.79	1.01722	1.25425	0.765635	0.400962	0.348197	0.640844	0.0636451	1.89356	0.557551	3.13986	0.582732	36.7339	1285.09	0.978889	1.36651	1.89356	0.548902	0.141138	0.432891	9.96e-07	3	3231	c
770	602	109	13.8094	2.9871	7.51332	19.677	774.034	297.705	35.6464	0.678806	1.14617	0.0572635	0.766245	0.880051	4.19406	0.737444	38.1273	1382.23	1.11078	1.3513	0.766245	0.402825	0.384901	0.689093	0.041176	1.89768	0.709634	4.26774	0.596942	38.0792	1379.29	1.09107	1.49691	1.89768	0.550787	0.199935	0.531874	9.37e-07	4	2487	c
771	454	75	11.7027	2.04738	6.6495	15.143	784.694	327.056	29.6251	0.70974	0.690962	0.0591512	0.820559	0.86344	4.00438	0.724228	38.0172	1374.16	1.09886	1.36011	0.820559	0.41633	0.35901	0.669704	0.0390803	2.19851	0.647997	4.12286	0.56584	37.9305	1367.3	1.09297	1.54073	2.19851	0.573539	0.173601	0.503884	9.13e-07	3	2487	c
772	455	71	11.9677	2.70879	7.51623	15.8807	429.512	325.939	34.0296	0.84191	0.59152	0.0607949	1.06265	0.87491	5.24752	0.689452	35.9279	1226.99	1.12756	1.4108	1.06265	0.457821	0.366172	0.684595	0.0440247	2.78497	0.65854	5.07803	0.543276	35.614	1203.68	1.11534	1.55197	2.78497	0.621553	0.174581	0.506804	1.22e-06	4	659	c
773	475	83	12.3355	3.76621	5.48177	18.6222	374.264	372.019	37.9801	0.892265	0.260897	0.104299	0.563781	0.8165	2.53619	0.797903	32.5854	1006.4	0.949711	1.13728	0.563781	0.357879	0.367898	0.633351	0.0766774	1.08543	0.641654	2.51449	0.706828	32.5327	1003	0.941085	1.24215	1.08543	0.4591	0.201535	0.492949	1.34e-06	7	1295	c
774	454	87	11.8821	3.73943	5.64294	18.0224	372.459	455.828	37.0616	0.892295	-0.00583878	0.226757	0.28623	0.809606	1.75168	0.866266	35.614	1219.06	0.737882	0.834921	0.28623	0.265406	0.408748	0.590591	0.202685	0.44357	0.698286	1.73508	0.806562	35.5722	1214.53	0.757917	0.899297	0.44357	0.325026	0.278162	0.502152	1.35e-06	7	5539	c
775	472	75	11.9064	2.60999	7.29012	16.1884	381.391	473.141	32.9048	0.820627	-0.201546	0.235138	0.330489	0.61666	1.43107	0.838168	34.9084	1174.6	0.656254	0.760117	0.330489	0.279954	0.243675	0.436074	0.196442	0.602941	0.297222	1.42897	0.754412	34.902	1175.73	0.629252	0.830031	0.602941	0.365489	0.0624527	0.228259	1.32e-06	5	5539	c
776	530	72	12.5541	1.37258	9.69013	15.7985	387.653	495.697	29.6234	0.621376	-0.152152	0.258797	0.284137	0.663894	1.42269	0.862149	35.503	1217.07	0.636577	0.728279	0.284137	0.263007	0.294937	0.471929	0.207709	0.520343	0.392931	1.42857	0.783512	35.4497	1213.1	0.637303	0.820191	0.520343	0.347549	0.0977242	0.284283	1.29e-06	3	5539	c
777	664	91	14.2549	2.53561	9.61765	18.5471	436.021	549.958	37.7923	0.767236	-0.233852	0.0937866	0.973243	0.862129	4.52955	0.726468	34.998	1165.27	1.05506	1.31902	0.973243	0.446736	0.361389	0.664165	0.0786046	2.59832	0.631041	4.52115	0.597588	34.8941	1158.5	1.02659	1.42931	2.59832	0.606003	0.172126	0.485798	1.17e-06	2	696	c
778	651	98	14.4407	2.8152	9.42912	20.6859	465.018	561.872	37.1314	0.738164	-0.988077	0.0577568	1	0.830587	3.95137	0.713056	36.6115	1271.31	1.10796	1.39167	1	0.448507	0.336983	0.656559	0.0376106	2.5113	0.583715	4.01633	0.565036	36.4383	1258.85	1.09287	1.55269	2.5113	0.593911	0.152376	0.475331	1.12e-06	3	4370	c
779	585	84	13.8899	3.72837	6.32859	19.5534	489.613	569.144	40.5345	0.868809	-0.713749	0.10297	0.854595	0.811258	3.26392	0.743638	36.7796	1289.14	0.989354	1.22728	0.854595	0.425997	0.344058	0.632057	0.0964323	1.96296	0.546384	3.16368	0.648901	36.6023	1278.07	0.945926	1.29362	1.96296	0.557108	0.172369	0.465318	1.09e-06	5	4370	c
780	450	69	11.6131	1.72379	7.92928	14.894	556.319	580.443	28.4207	0.670583	1.21376	0.138664	0.445438	0.726418	1.81409	0.798032	33.1622	1049.35	0.812011	0.961336	0.445438	0.321925	0.296583	0.533375	0.109002	0.840314	0.500606	1.84133	0.692932	33.034	1040.99	0.808781	1.07223	0.840314	0.409519	0.125626	0.365892	1.06e-06	4	4370	c
781	537	97	12.5724	3.14688	4.40594	18.6088	593.441	581.432	34.3147	0.71315	1.1523	0.0557447	1.05755	0.880806	5.43624	0.69279	36.3821	1258.88	1.1374	1.42321	1.05755	0.45723	0.364515	0.685384	0.0407729	2.87253	0.671387	5.37069	0.546251	36.0857	1237.14	1.12104	1.56769	2.87253	0.620009	0.169809	0.502408	1.08e-06	3	4370	c
782	466	79	12.0608	2.60019	8.03495	16.9023	654.826	566.621	31.2694	0.701187	0.565579	0.0360822	1.92294	0.790401	5.5872	0.589087	35.449	1191.32	1.17235	1.57465	1.92294	0.549692	0.244184	0.595533	0.0242676	5.42222	0.43175	5.77099	0.424687	35.3975	1186.42	1.15197	1.72632	5.42222	0.740694	0.0794935	0.364923	1.23e-06	4	1429	c
783	707	108	14.6964	3.19001	5.70873	21.0176	722.605	508.099	37.8701	0.73075	0.513195	0.114122	0.385314	0.858768	2.36412	0.820969	40.6851	1586.65	0.916023	1.04301	0.385314	0.302977	0.434547	0.662999	0.0772086	0.882353	0.67923	2.37537	0.693887	40.5131	1572.16	0.920857	1.1976	0.882353	0.42002	0.210276	0.495263	1.39e-06	8	10822	c
784	585	94	13.3254	2.40661	7.01394	18.1672	745.865	535.09	28.9048	0.289638	-0.592312	0.0702914	0.940285	0.86791	4.55926	0.704399	36.8144	1289.59	1.08913	1.34776	0.940285	0.439925	0.355514	0.664552	0.0684559	2.31496	0.67353	4.54544	0.594907	36.6811	1281.04	1.05559	1.4269	2.31496	0.583266	0.20303	0.524992	1.21e-06	4	10822	c
785	621	102	13.9351	2.90988	7.28693	19.5067	762.653	510.636	33.4701	0.574658	0.761323	0.0567035	0.891201	0.844281	3.86156	0.711181	37.8596	1362.21	1.09468	1.36192	0.891201	0.426518	0.33921	0.653217	0.0376362	2.34622	0.597146	3.91201	0.565347	37.5727	1341.16	1.0781	1.5321	2.34622	0.585849	0.142214	0.457259	1.14e-06	6	10822	c
786	652	84	14.0405	2.50565	8.2059	18.5666	655.35	376.244	36.1843	0.727313	1.36625	0.0563513	1.05205	0.859834	4.75288	0.680169	36.1671	1241.99	1.12392	1.41069	1.05205	0.454678	0.343002	0.665098	0.041679	2.91019	0.593841	4.58257	0.525841	35.9637	1227.6	1.08997	1.55637	2.91019	0.626348	0.136484	0.451506	1.3e-06	7	669	c
787	553	84	13.1134	3.09543	7.83945	17.969	631.343	350.003	36.9601	0.830485	-1.33064	0.0567058	0.889642	0.869478	4.40802	0.70322	37.7251	1352.22	1.12617	1.38615	0.889642	0.423971	0.375741	0.688043	0.0428767	2.3368	0.645198	4.2931	0.540847	37.526	1337.3	1.10527	1.52633	2.3368	0.580779	0.17806	0.507888	1.16e-06	4	717	c
788	779	111	15.8894	3.72335	8.77576	22.6983	576.295	312.461	43.6432	0.817497	-1.25488	0.0412849	1.02604	0.871952	5.00646	0.672751	37.4782	1333.94	1.16105	1.46715	1.02604	0.446687	0.338221	0.670565	0.027511	2.75072	0.654849	4.98481	0.517172	37.3043	1320.9	1.14208	1.63441	2.75072	0.606177	0.148269	0.479882	1.02e-06	3	923	c
789	537	78	12.9359	2.37191	8.27012	17.6355	546.656	295.62	34.2962	0.765765	-0.78007	0.0601117	1.74404	0.834091	6.25601	0.635429	32.3872	994.689	1.15564	1.49786	1.74404	0.542528	0.31354	0.653488	0.0464031	4.32043	0.553973	5.84324	0.502044	32.0581	972.874	1.10938	1.60323	4.32043	0.698672	0.141453	0.465344	1.05e-06	4	584	c
790	614	90	13.9494	3.18584	8.07045	20.753	763.872	659.293	38.2019	0.812603	-1.39512	0.0771682	0.924684	0.81762	3.53505	0.708489	36.5599	1270.41	1.04652	1.29884	0.924684	0.437206	0.328169	0.632019	0.0532544	2.33021	0.506063	3.35881	0.573206	36.2251	1246.49	1.02019	1.44583	2.33021	0.587161	0.114356	0.401061	8.35e-07	4	3142	c
791	696	101	15.3296	4.06597	6.98627	21.9977	747.433	681.967	43.8051	0.865639	0.588986	0.10853	0.61698	0.813841	2.65713	0.753746	38.3196	1403.24	0.940067	1.13334	0.61698	0.370507	0.336345	0.606315	0.0884357	1.49342	0.518719	2.55151	0.615751	38.1053	1388.86	0.90113	1.23102	1.49342	0.505017	0.106501	0.359608	9e-07	6	3142	c
792	642	106	15.1959	5.52715	3.82479	25.2603	735.838	698.207	50.6641	0.919782	0.379387	0.0686777	0.789828	0.828802	3.30676	0.73208	38.1997	1389.18	1.0413	1.28671	0.789828	0.41002	0.338835	0.639056	0.053101	1.87132	0.57174	3.1848	0.600487	37.9412	1370.86	1.00893	1.40768	1.87132	0.545485	0.148422	0.449472	9.27e-07	7	3142	c
793	624	80	13.8219	1.79734	11.1243	16.9573	556.328	839.635	34.45	0.710114	0.78967	0.0439887	1.18938	0.873165	5.68872	0.691954	35.5011	1193.49	1.20932	1.51944	1.18938	0.473333	0.370444	0.706284	0.0322947	2.90958	0.679691	5.54185	0.552846	35.2495	1175.91	1.18123	1.63004	2.90958	0.618626	0.196521	0.546807	1.13e-06	5	683	c
794	434	68	11.417	1.53968	8.94524	14.0844	597.821	866.058	28.8955	0.689926	0.415665	0.0933279	1.83859	0.836636	6.62728	0.663349	32.3074	995.074	1.09192	1.39408	1.83859	0.546211	0.332822	0.653337	0.0879224	5.23158	0.539566	6.68114	0.570501	32.0421	977.279	1.06169	1.43072	5.23158	0.702161	0.148642	0.453055	1.05e-06	3	1990	c
795	489	71	12.0803	1.5301	9.5412	15.7245	619.072	882.646	29.7023	0.657064	0.145804	0.0831151	0.919672	0.87504	4.67985	0.701475	35.2858	1184.11	1.07602	1.32711	0.919672	0.434801	0.376801	0.678213	0.0594835	2.72055	0.625838	4.63553	0.545946	35.0993	1170.62	1.05821	1.47985	2.72055	0.618713	0.176572	0.49919	1.01e-06	4	1990	c
796	755	87	15.1661	1.64996	12.3309	19.463	644.309	903.319	35.5537	0.59785	0.471747	0.0621315	0.830017	0.881748	4.50954	0.735259	37.177	1315.48	1.08989	1.34176	0.830017	0.418242	0.372569	0.677498	0.0423564	2.2522	0.682169	4.54308	0.585561	37.0264	1304.02	1.08059	1.51777	2.2522	0.572473	0.17985	0.509059	9.63e-07	3	1990	c
797	388	65	10.7421	1.69324	7.84671	13.9108	611.81	952.222	27.9205	0.736663	1.29162	0.0730174	1.66412	0.750635	4.33671	0.632607	34.1773	1109.53	1.04353	1.3825	1.66412	0.533911	0.23498	0.55494	0.0526812	4.80357	0.285472	4.36136	0.485281	33.9167	1092.12	1.00037	1.4918	4.80357	0.706959	0.0545788	0.283368	1.02e-06	3	443	c
798	525	86	13.0791	3.91228	6.92682	19.6286	582.763	964.468	40.438	0.897891	1.24886	0.0732675	1.45241	0.794	4.52526	0.658453	35.2794	1180.69	1.10276	1.41505	1.45241	0.511758	0.298974	0.626021	0.0566344	3.7051	0.464588	4.46005	0.534799	34.9512	1158.57	1.06267	1.53045	3.7051	0.669262	0.125163	0.429905	1.05e-06	5	562	c
799	591	86	13.2915	2.0108	8.76772	16.1746	496.112	890.758	31.7946	0.567053	0.170943	0.0708236	1.12466	0.842601	4.57264	0.697113	36.0967	1239.05	1.08406	1.37773	1.12466	0.468345	0.317044	0.636345	0.0541023	2.94706	0.565303	4.38978	0.560813	35.7706	1215.81	1.05457	1.50606	2.94706	0.628449	0.123146	0.423473	1.23e-06	6	894	c
800	645	87	14.4348	3.2458	9.7532	20.5516	752.545	945.857	39.7531	0.829608	0.935638	0.103897	0.824742	0.81467	3.22506	0.735966	36.5361	1272.27	0.980601	1.21638	0.824742	0.420753	0.320008	0.60898	0.0820314	2.10873	0.505926	3.13403	0.602722	36.2121	1250.33	0.943181	1.31646	2.10873	0.569312	0.100448	0.360514	6.2e-07	4	1565	c
801	567	80	13.2857	3.05924	7.68147	17.7962	694.623	975.546	36.9672	0.826734	0.553421	0.0864361	0.771294	0.860815	3.77075	0.727294	36.9727	1301.11	1.04504	1.28715	0.771294	0.406554	0.369114	0.66451	0.0637037	2.16162	0.597601	3.68591	0.584125	36.5859	1272.79	1.03014	1.44647	2.16162	0.576062	0.146062	0.451454	7.89e-07	5	759	c
802	380	67	11.2631	3.33275	5.95425	16.9368	674.387	994.403	34.6437	0.901925	0.493552	0.0460803	1.29542	0.82242	4.64743	0.667454	36.1724	1240.37	1.14279	1.47186	1.29542	0.487084	0.307934	0.644013	0.0319811	2.85443	0.597925	4.54962	0.526967	35.7405	1209.84	1.12127	1.60895	2.85443	0.61578	0.156805	0.489368	8.09e-07	5	1009	c
803	609	86	14.0194	3.28686	7.62735	20.5633	636.629	1034.35	37.9008	0.797136	0.324986	0.122732	0.574082	0.682486	1.90403	0.77134	32.4078	1000.67	0.822518	1.01564	0.574082	0.360805	0.24292	0.494815	0.0840119	1.29026	0.357471	2.00405	0.631273	32.3277	995.91	0.812891	1.15355	1.29026	0.481137	0.0566724	0.255083	7.61e-07	5	1435	c
804	526	81	13.0653	2.93084	8.72801	18.8792	597.232	1051.1	36.583	0.833459	-0.677871	0.0763749	1.30143	0.873886	6.15972	0.658704	34.1517	1110.09	1.12522	1.41894	1.30143	0.493848	0.357157	0.678542	0.0541063	4.17597	0.613355	6.40026	0.505161	33.8541	1088.6	1.12526	1.5822	4.17597	0.692566	0.161609	0.492784	7.28e-07	4	695	c
805	689	91	14.5505	2.91846	8.42912	19.4161	779.609	1032.55	39.0939	0.79192	1.17827	0.0915278	0.51598	0.87471	3.05914	0.781748	38.0254	1379.31	0.990446	1.1638	0.51598	0.345177	0.427129	0.684482	0.0617152	1.41748	0.659574	3.08192	0.640091	37.8317	1364.16	0.990879	1.34951	1.41748	0.506602	0.186356	0.492134	3.42e-07	2	1605	c
806	560	86	13.6055	3.89485	6.97582	20.2022	150.591	772.902	40.8991	0.894917	0.42984	0.0652586	0.991375	0.78458	3.30102	0.702041	37.8079	1359.05	1.05408	1.34528	0.991375	0.447596	0.283288	0.598771	0.047229	2.4265	0.468224	3.2815	0.569628	37.6356	1347.37	1.02049	1.47872	2.4265	0.591367	0.10878	0.395506	1.16e-06	6	1404	c
807	759	87	15.2633	1.65486	12.4201	18.5614	176.893	794.711	36.3869	0.639516	0.464792	0.0632362	0.785689	0.869507	4.01048	0.72705	36.7051	1278.15	1.11171	1.34656	0.785689	0.408148	0.387329	0.690143	0.0428195	2.12335	0.634915	3.90802	0.57566	36.5345	1265.94	1.0883	1.51014	2.12335	0.569547	0.167693	0.491429	1.19e-06	5	1404	c
808	711	103	14.8219	3.72196	5.52414	21.1321	106.154	780.257	40.8437	0.781298	0.39712	0.062205	0.717342	0.879425	3.97466	0.74843	38.1025	1381	1.09142	1.31992	0.717342	0.396347	0.391497	0.6885	0.0457114	1.67427	0.701065	3.80038	0.615022	37.899	1366.44	1.06275	1.44933	1.67427	0.523666	0.208885	0.535575	1.01e-06	4	1459	c
809	643	85	14.0533	1.61145	10.7726	17.6592	103.106	805.477	32.8454	0.593796	0.584685	0.0799257	0.745875	0.849617	3.47991	0.726568	37.7607	1357.86	1.03629	1.26111	0.745875	0.399586	0.363835	0.6552	0.056132	1.93881	0.59559	3.39708	0.580055	37.6416	1348.66	1.02181	1.40806	1.93881	0.557086	0.144338	0.443525	1.03e-06	4	1459	c
810	760	88	15.2881	1.83411	11.4828	18.1481	122.513	835.723	36.4881	0.652115	0.596353	0.0965306	0.636837	0.836317	2.94533	0.775087	37.71	1354.95	0.997513	1.20363	0.636837	0.378945	0.38076	0.657451	0.0738903	1.46784	0.60218	2.84485	0.657874	37.5468	1342.76	0.983833	1.32596	1.46784	0.509979	0.172296	0.470313	1.14e-06	4	855	c
811	534	83	12.8783	2.36173	8.89938	18.2415	140.881	898.218	32.5114	0.67317	0.330222	0.0587495	0.753018	0.872331	3.94911	0.727918	36.8717	1289.82	1.11176	1.34473	0.753018	0.400216	0.395608	0.696261	0.0417718	1.72103	0.700411	3.87232	0.578314	36.618	1271.86	1.09215	1.48163	1.72103	0.518169	0.218601	0.552134	1.2e-06	7	1474	c
812	535	94	12.0221	3.95217	2.93326	18.1597	127.254	957.677	36.4582	0.812133	0.311911	0.222735	0.302432	0.682956	1.47696	0.854255	35.7705	1234.31	0.660567	0.758789	0.302432	0.271203	0.298826	0.483737	0.167631	0.562368	0.423704	1.48792	0.764482	35.8351	1238.5	0.66256	0.849152	0.562368	0.355259	0.100042	0.292475	1.2e-06	7	4128	c
813	765	94	15.3119	2.1925	12.033	20.147	167.321	975.844	37.6352	0.67714	-0.109783	0.0945093	0.542975	0.871232	3.10834	0.776099	37.5247	1341.65	1.00406	1.17969	0.542975	0.351624	0.409382	0.674645	0.0720699	1.2219	0.687909	2.9576	0.654504	37.3766	1330.84	0.986613	1.29597	1.2219	0.475792	0.207079	0.508636	1.09e-06	5	4128	c
814	558	101	13.0972	2.26207	8.52077	17.0677	133.557	982.788	29.0284	0.342713	-1.20647	0.113425	0.483179	0.800276	2.20962	0.787079	40.2882	1555.08	0.908849	1.07322	0.483179	0.332729	0.341565	0.597744	0.0800035	1.03814	0.579465	2.2343	0.648729	40.2669	1554.19	0.893234	1.20562	1.03814	0.431382	0.14363	0.412543	1.15e-06	6	4128	c
815	714	85	14.7138	1.59412	12.1587	18.7544	173.626	1023.98	34.5075	0.621923	0.579961	0.122107	0.640059	0.704131	2.08166	0.761958	38.3902	1410.64	0.880896	1.09323	0.640059	0.380095	0.25371	0.521681	0.101739	1.32919	0.322312	1.98068	0.662696	38.3975	1415.54	0.808378	1.15962	1.32919	0.497807	0.0645522	0.272831	9.62e-07	7	4128	c
816	735	89	14.8662	1.37059	12.3668	17.6188	252.065	1026.03	34.5931	0.51915	0.174574	0.0634539	0.849551	0.928006	6.90014	0.714297	35.9332	1232.12	1.15722	1.39766	0.849551	0.42216	0.445341	0.742294	0.0446979	2.34098	0.791676	6.61861	0.562476	35.5581	1203.59	1.15674	1.55094	2.34098	0.591252	0.255198	0.603919	8.12e-07	3	715	c
817	551	79	12.9642	2.17382	8.58987	17.1833	361.547	972.237	32.71	0.728924	0.303116	0.0965613	0.823472	0.795138	3.00982	0.745603	37.6741	1351.53	1.00922	1.25378	0.823472	0.412702	0.326537	0.622043	0.0625338	2.21255	0.479141	3.12394	0.604215	37.5567	1342.86	0.997521	1.41902	2.21255	0.57417	0.123464	0.412709	1.1e-06	8	5130	c
818	786	102	15.917	3.34446	10.8562	23.0582	352.248	900.819	42.2313	0.808416	0.592136	0.0836292	0.678788	0.821295	2.89919	0.76	39.4263	1482.97	1.00683	1.22933	0.678788	0.38894	0.350066	0.637543	0.0612756	1.6156	0.569017	2.87432	0.637394	39.3092	1474.67	0.984408	1.36627	1.6156	0.520239	0.15758	0.456519	1.13e-06	7	5130	c
819	664	93	14.2453	2.7424	7.79723	19.2326	362.505	878.093	35.111	0.659557	0.60128	0.103226	0.57992	0.806515	2.49862	0.771727	41.192	1624.35	0.955954	1.15532	0.57992	0.362441	0.332523	0.607626	0.0739001	1.30717	0.592393	2.60347	0.640092	41.1399	1620.51	0.947809	1.30047	1.30717	0.483487	0.145033	0.428967	1.13e-06	5	5130	c
820	544	89	13.038	4.05626	2.82954	19.1304	379.705	832.473	39.3844	0.855499	0.709475	0.0487025	0.825334	0.891616	4.80744	0.709055	38.4562	1405.71	1.15601	1.41419	0.825334	0.414203	0.393241	0.70678	0.0329826	2.39407	0.67758	4.71265	0.552207	38.2542	1390.27	1.13529	1.58882	2.39407	0.594188	0.176054	0.513946	1.08e-06	5	1885	c
821	581	80	13.2664	1.71384	10.496	16.8141	410.195	843.747	32.6017	0.672254	0.72843	0.0619092	0.86322	0.865147	4.20059	0.717639	36.9986	1300.32	1.10459	1.35823	0.86322	0.426549	0.379334	0.685928	0.0424575	2.60153	0.626339	4.48114	0.567386	36.7471	1282.46	1.09406	1.53117	2.60153	0.605771	0.190476	0.524935	1.15e-06	3	1885	c
822	482	74	12.3086	2.60002	7.84706	17.0058	439.802	840.724	33.2046	0.805604	0.585444	0.0888108	0.537862	0.853424	2.83476	0.771826	40.5479	1574.66	0.95173	1.13054	0.537862	0.349267	0.38201	0.643158	0.0624479	1.247	0.659226	2.82966	0.647002	40.47	1568.72	0.939704	1.25736	1.247	0.481134	0.180687	0.470112	1.18e-06	6	1885	c
823	631	96	13.7422	2.82258	7.55377	19.4898	462.794	805.256	36.0843	0.738175	0.311656	0.106218	0.502124	0.831784	2.49249	0.785641	39.017	1456.2	0.928575	1.09401	0.502124	0.341223	0.375108	0.629729	0.0760309	1.12747	0.609886	2.44505	0.65386	38.9013	1447.81	0.912293	1.22427	1.12747	0.456218	0.159529	0.437293	1.15e-06	4	1878	c
824	614	90	13.685	2.73876	8.91431	19.3229	498.236	753.1	34.3697	0.651712	0.856966	0.0778679	0.824118	0.837847	3.54118	0.733389	37.8472	1364.83	1.03026	1.27893	0.824118	0.416986	0.329213	0.6292	0.0623586	1.97921	0.606219	3.51308	0.602386	37.5822	1346.39	0.999201	1.39101	1.97921	0.560635	0.139112	0.433325	1.14e-06	4	2159	c
825	627	99	14.1527	3.98745	6.27672	21.6786	377.874	56.4456	41.383	0.85478	-1.1183	0.128204	0.439689	0.759899	1.91563	0.797795	31.6312	951.345	0.83963	0.98743	0.439689	0.318774	0.316669	0.557054	0.0910753	0.990619	0.463758	1.92367	0.660038	31.606	950.809	0.814687	1.11742	0.990619	0.428641	0.0956383	0.325831	1.81e-06	4	1569	c
826	620	87	13.8448	2.67954	7.96924	18.8373	345.524	50.2195	35.955	0.743973	1.54413	0.0486129	0.98412	0.856613	4.43169	0.680745	33.9206	1087.53	1.13668	1.42885	0.98412	0.435298	0.331253	0.657971	0.0352578	2.30989	0.650777	4.30718	0.528115	33.5646	1064.53	1.10529	1.57491	2.30989	0.575279	0.149908	0.47461	1.9e-06	2	798	c
827	500	76	12.3823	2.35249	7.78152	17.5387	309.364	73.5252	31.9072	0.727929	-1.3616	0.037597	1.39366	0.859581	5.96251	0.672016	32.0843	970.975	1.22141	1.56714	1.39366	0.492691	0.343824	0.6916	0.027261	3.18535	0.68061	5.98662	0.52713	31.8124	953.886	1.19986	1.69465	3.18535	0.639342	0.196291	0.555398	2.4e-06	9	2825	c
828	426	74	11.5511	2.97675	5.68739	17.0006	265.009	23.8865	34.1949	0.857475	0.22375	0.0460052	1.81599	0.824633	6.17769	0.604641	31.8997	962.795	1.17678	1.56134	1.81599	0.549129	0.283547	0.634828	0.0407475	4.72238	0.500675	5.72876	0.478824	31.238	921.088	1.12325	1.64205	4.72238	0.711059	0.106272	0.410256	1.96e-06	8	576	c
829	336	57	9.9368	1.13203	8.38626	12.5361	247.501	56.1497	24.2346	0.653316	1.2777	0.0762989	1.09976	0.744466	3.15189	0.685225	35.3846	1189.31	1.0072	1.30847	1.09976	0.4658	0.246311	0.554596	0.0614578	2.95455	0.310715	3.14319	0.54525	35.0874	1170.22	0.961208	1.41859	2.95455	0.634509	0.0539647	0.275066	2.52e-06	9	2825	c
830	769	105	15.9481	3.61836	9.01651	22.1373	210.373	46.011	43.6635	0.824672	1.05309	0.058497	0.924285	0.838891	3.86851	0.70891	34.0436	1095	1.11269	1.38251	0.924285	0.435109	0.345008	0.661881	0.0398998	2.22901	0.599091	3.77995	0.569062	33.7771	1078.03	1.07939	1.53391	2.22901	0.578988	0.141208	0.455949	2.33e-06	7	2201	c
831	400	81	11.0251	2.55396	4.94273	17.1554	150.005	71.3228	28.4551	0.687863	-0.0948647	0.0454096	1.27055	0.787751	3.99306	0.649448	35.3103	1181.17	1.09823	1.44454	1.27055	0.483772	0.256249	0.588167	0.0313163	3.37267	0.448315	4.0567	0.486431	34.8758	1151.99	1.06541	1.58331	3.37267	0.641721	0.0878525	0.367967	2.49e-06	8	1425	c
832	693	107	15.3127	4.50287	6.4672	24.5493	174.856	93.8658	44.6001	0.84156	1.26244	0.04026	1.53284	0.828106	5.4587	0.656419	33.7322	1075.26	1.19062	1.57279	1.53284	0.519893	0.304354	0.656822	0.0264118	4.01151	0.594276	5.94365	0.504164	33.5082	1059.93	1.19466	1.74667	4.01151	0.683949	0.157836	0.508595	2.84e-06	9	1425	c
833	444	86	11.4923	3.08895	4.68436	17.3363	139.357	139.385	33.317	0.826128	0.202452	0.147295	0.460591	0.715833	1.81042	0.797783	31.4089	939.449	0.803841	0.962042	0.460591	0.328831	0.278347	0.51705	0.0954262	1.18207	0.354629	1.9158	0.653533	31.3125	933.739	0.795988	1.13514	1.18207	0.471685	0.0717527	0.284623	2.88e-06	7	2855	c
834	601	82	13.4293	1.37889	10.5719	16.6524	154.167	308	31.2861	0.572368	-0.511878	0.0476334	1.29438	0.860823	5.6501	0.683921	34.1948	1105.97	1.19992	1.51801	1.29438	0.468132	0.356972	0.694947	0.0326447	3.41088	0.630937	5.621	0.518802	34.0075	1093.06	1.17479	1.65707	3.41088	0.636964	0.172783	0.518683	2.62e-06	5	1381	c
835	671	87	14.1881	1.61974	10.1396	17.6679	160.564	332.091	31.9109	0.45156	-1.12783	0.070323	0.816278	0.816785	3.22765	0.727543	34.4204	1122.06	1.04419	1.29748	0.816278	0.414423	0.32531	0.629233	0.0456366	2.16639	0.523231	3.27194	0.566315	34.3143	1115.11	1.02486	1.47258	2.16639	0.563574	0.116233	0.407638	2.55e-06	3	1381	c
836	781	134	14.6038	4.69071	3.15308	22.8611	196.147	515.833	38.9156	0.546961	1.08416	0.0767274	0.614479	0.864047	3.25989	0.767579	24.4524	556.541	1.04049	1.23164	0.614479	0.37431	0.412213	0.687346	0.0549453	1.26758	0.712351	3.20335	0.643056	24.1239	540.563	1.03668	1.35884	1.26758	0.48067	0.232145	0.547848	1.71e-06	2	1332	c
837	762	95	15.4934	2.87625	9.12192	19.9631	276.652	415.145	41.0376	0.775754	-0.685659	0.0419525	1.51928	0.860089	6.42945	0.639073	29.2247	805.515	1.20123	1.55449	1.51928	0.510875	0.316801	0.665567	0.0303587	3.93006	0.621745	6.19499	0.490895	28.9241	787.063	1.17139	1.68858	3.93006	0.675165	0.13872	0.47172	2.28e-06	7	2694	c
838	481	72	11.9454	1.61534	8.13871	15.4053	278.318	348.908	29.0413	0.667219	-0.224028	0.125674	0.567853	0.70066	1.94851	0.782068	27.5701	717.589	0.842504	1.0337	0.567853	0.359683	0.272568	0.527585	0.101076	0.914692	0.480968	1.88115	0.679147	27.4834	714.21	0.80758	1.09114	0.914692	0.420805	0.122876	0.364852	2.36e-06	4	1329	c
839	532	76	12.8203	2.13284	8.96256	17.3254	352.575	221.666	32.6559	0.735775	0.396752	0.072208	0.694248	0.83864	3.15124	0.736357	28.2704	750.122	1.02688	1.25966	0.694248	0.385368	0.339685	0.63463	0.0510444	1.51739	0.650294	3.16952	0.594859	28.187	745.731	1.01032	1.39438	1.51739	0.49931	0.165604	0.471772	2.28e-06	2	1849	c
840	775	112	16.076	4.43844	8.88339	24.6509	410.087	194.085	45.6952	0.826671	-0.371293	0.0440966	1.07602	0.896728	6.20963	0.68202	34.4671	1126.34	1.2019	1.50265	1.07602	0.460079	0.37649	0.708438	0.0291454	2.80764	0.72813	6.16356	0.529916	34.2115	1108.44	1.18736	1.6607	2.80764	0.617805	0.190527	0.543247	2.32e-06	6	716	c
841	597	101	14.5009	4.55132	7.36397	23.7136	384.224	155.431	44.8526	0.906619	-0.114385	0.0573203	0.948938	0.850615	4.17615	0.707823	33.53	1062.74	1.11114	1.39153	0.948938	0.439267	0.336588	0.65619	0.0357081	2.3314	0.632246	4.16978	0.560273	33.4167	1055.6	1.08626	1.54718	2.3314	0.58405	0.144453	0.462682	2.43e-06	10	4345	c
842	517	91	13.5367	3.88213	7.41292	21.0422	398.9	113.994	38.5601	0.872043	0.271	0.0538916	1.81289	0.741128	4.50152	0.648319	30.4858	874.296	1.12426	1.50728	1.81289	0.541064	0.235811	0.575891	0.0415184	3.97892	0.367505	4.14542	0.514159	30.1148	853.043	1.05549	1.60395	3.97892	0.678294	0.0842329	0.362699	2.33e-06	8	4345	c
843	406	64	10.9825	1.24961	8.79864	12.7712	478.767	110.396	26.747	0.656079	-1.19744	0.048202	1.43481	0.807238	4.72173	0.646366	32.2647	982.31	1.13824	1.49057	1.43481	0.504055	0.281765	0.621833	0.0352189	3.66952	0.50689	4.72079	0.494214	32.0057	966.789	1.09331	1.60157	3.66952	0.660756	0.0989095	0.391799	1.96e-06	4	444	c
844	584	106	14.143	3.77579	7.86877	22.5203	234.458	225.96	38.1821	0.780156	1.27341	0.0698693	0.701486	0.851409	3.36045	0.730594	36.8853	1292.42	1.05686	1.29247	0.701486	0.38584	0.349003	0.648834	0.0449995	1.88538	0.604276	3.38218	0.568717	36.7628	1284.84	1.02491	1.46238	1.88538	0.541985	0.144267	0.450974	2.84e-06	7	5154	c
845	427	78	11.3404	1.91575	6.21578	14.7863	199.609	217.4	27.7989	0.611725	-0.64912	0.0646323	0.683673	0.88396	3.94586	0.733929	35.4069	1189.47	1.07951	1.29169	0.683673	0.383631	0.40978	0.6972	0.0452767	1.77465	0.677579	3.75207	0.574979	35.093	1167.54	1.05903	1.43799	1.77465	0.530861	0.189656	0.510039	2.98e-06	10	5154	c
846	463	92	11.5686	2.67265	6.10266	17.9765	177.769	244.653	28.8123	0.518947	-1.55702	0.129416	0.418646	0.779335	1.9486	0.81348	31.0362	916.211	0.823057	0.965237	0.418646	0.316528	0.339987	0.571469	0.086586	0.904639	0.561272	2.03098	0.68067	30.8995	907.327	0.831104	1.10038	0.904639	0.420567	0.138659	0.388858	2.91e-06	9	5154	c
847	715	92	14.8289	3.16985	7.26826	20.6372	259.655	155.513	39.531	0.773118	-0.282899	0.140159	0.491091	0.75626	2.00741	0.786526	27.1659	695.467	0.861382	1.02346	0.491091	0.337039	0.309904	0.55941	0.100023	1.14082	0.450383	2.03783	0.657437	27.0237	688.454	0.842749	1.16221	1.14082	0.460097	0.090261	0.322553	2.77e-06	5	1102	c
848	488	94	13.0995	4.99148	5.45674	20.5336	254.694	125.878	45.4795	0.944063	-0.130807	0.0641322	1.16388	0.805432	3.99093	0.666221	34.6912	1141.14	1.07061	1.37521	1.16388	0.472751	0.303644	0.623533	0.0497592	2.6398	0.505864	3.67112	0.550343	34.2368	1111.86	1.01304	1.46606	2.6398	0.613546	0.105395	0.387946	2.86e-06	6	565	c
849	484	73	12.7982	3.30238	7.20631	18.5635	438.989	305.979	37.4484	0.870879	-0.838237	0.0429153	1.13921	0.890827	6.21745	0.65453	34.6301	1137.59	1.19566	1.50244	1.13921	0.463059	0.365414	0.699416	0.0310773	3.09113	0.705651	6.25079	0.505901	34.3381	1117.55	1.17727	1.65936	3.09113	0.633863	0.181254	0.530668	1.89e-06	5	489	c
850	583	82	13.3194	2.84804	7.98054	18.0577	411.057	376.015	36.4476	0.804266	0.107028	0.162317	0.54936	0.769673	2.19256	0.804167	25.638	619.129	0.840692	1.0158	0.54936	0.355325	0.330453	0.575408	0.131559	1.03984	0.538017	2.12541	0.708718	25.4422	609.33	0.82785	1.10378	1.03984	0.449679	0.148109	0.402302	1.63e-06	2	3338	c
851	428	73	11.5621	2.87717	5.96672	17.2468	397.11	402.074	32.9613	0.835852	1.35996	0.0843235	0.700379	0.797953	2.73321	0.746903	23.9482	534.492	0.964266	1.19411	0.700379	0.393874	0.311862	0.597271	0.0632861	1.60335	0.53743	2.73309	0.625403	23.7095	523.652	0.942783	1.31059	1.60335	0.517655	0.128995	0.406604	1.71e-06	3	3338	c
852	493	2	0.707107	0	0.707107	0.707107	368.625	431.852	33.7356	0.788838	-0.856112	0.0308013	1.4228	0.886153	7.24876	0.622751	31.5202	939.343	1.25849	1.6162	1.4228	0.501462	0.345551	0.700648	0.0206428	4.15815	0.652316	6.97978	0.454781	30.9757	904.555	1.23019	1.77054	4.15815	0.682106	0.154389	0.506334	1.97e-06	3	3338	c
853	347	71	10.6219	2.89924	5.19842	15.9191	298.325	459.242	30.744	0.833069	-0.923667	0.052199	0.9271	0.849867	4.08759	0.702405	34.4485	1123.89	1.09484	1.36308	0.9271	0.43003	0.335439	0.650143	0.0404105	2.04467	0.670284	4.10066	0.55558	34.3746	1118.98	1.07866	1.46934	2.04467	0.557358	0.167002	0.484657	2.27e-06	8	879	c
854	515	80	12.4944	2.32635	8.17096	16.6648	338.882	491.858	32.4102	0.754298	0.040097	0.161517	0.450756	0.661818	1.66644	0.801511	30.1339	865.627	0.750043	0.901987	0.450756	0.326133	0.247961	0.474684	0.127226	0.885845	0.302015	1.63457	0.702283	30.0228	861.052	0.707319	0.980527	0.885845	0.4269	0.0516809	0.225142	2.4e-06	4	4328	c
855	392	87	11.9696	4.2178	3.1836	18.071	286.251	495.321	37.2794	0.894846	-0.606109	0.0236838	2.74665	0.814479	8.40251	0.545513	28.3387	759.413	1.27309	1.75383	2.74665	0.618604	0.248489	0.626126	0.0204798	6.5566	0.540032	8.12724	0.415806	27.978	737.262	1.23272	1.83012	6.5566	0.762842	0.123358	0.462433	2.18e-06	6	4328	c
856	342	83	11.2597	4.37679	2.8543	19.2549	316.214	528.514	37.8738	0.916272	-0.0436754	0.0842865	0.837418	0.736073	2.58646	0.722237	26.6332	664.974	0.953117	1.21124	0.837418	0.419751	0.270213	0.561299	0.0572434	1.71583	0.493811	2.69485	0.572218	26.723	669.872	0.939142	1.33492	1.71583	0.519733	0.12995	0.411502	2.27e-06	6	4328	c
857	405	73	11.1644	2.01847	7.3658	15.2565	370.137	537.113	28.8712	0.733111	0.628768	0.0466661	1.33333	0.835505	5.0528	0.660322	30.6828	885.6	1.17479	1.5072	1.33333	0.488604	0.314059	0.655486	0.0365709	3.43695	0.545464	4.78072	0.512066	30.3871	868.425	1.11699	1.57415	3.43695	0.647655	0.139754	0.458946	2.65e-06	6	1604	c
858	772	113	15.4972	4.07909	6.67278	22.4619	357.397	550.339	44.1692	0.809373	0.58548	0.0495183	0.861246	0.89012	4.91903	0.716269	32.5228	998.129	1.16501	1.42945	0.861246	0.424259	0.391215	0.707834	0.0340642	2.22828	0.7012	4.72871	0.565322	32.3137	984.421	1.14104	1.5908	2.22828	0.57424	0.191191	0.534404	2.56e-06	4	1604	c
859	703	98	15.578	5.17861	7.48854	24.469	304.417	558.111	51.9015	0.915817	0.735945	0.0246267	2.24943	0.905418	12.8914	0.603443	28.1894	764.494	1.37195	1.79231	2.24943	0.577897	0.354772	0.733732	0.0170007	6.2224	0.729244	12.4908	0.437543	27.8166	740.067	1.35288	1.94122	6.2224	0.756337	0.193986	0.583944	2e-06	4	1012	c
860	540	81	13.0929	2.86971	8.74082	18.7131	355.983	591.057	36.334	0.831371	0.374295	0.042633	1.32426	0.825584	4.79626	0.648669	32.1262	972.29	1.16773	1.51658	1.32426	0.493716	0.299147	0.642989	0.0301412	3.52621	0.534063	4.784	0.498953	32.0168	965.143	1.13744	1.66877	3.52621	0.662676	0.111193	0.422352	2.37e-06	4	1438	c
861	414	76	11.054	1.74283	7.36508	14.4216	389.727	592.783	27.3251	0.578945	0.201907	0.0394993	1.74624	0.822922	5.93071	0.60816	29.7345	833.04	1.18515	1.57737	1.74624	0.539772	0.266489	0.619907	0.0355829	3.8732	0.590289	5.72675	0.490889	29.4236	814.965	1.14057	1.64301	3.8732	0.676349	0.127532	0.447807	2.64e-06	7	942	c
862	403	69	11.0305	1.93936	7.07942	14.4639	414.612	591.641	28.9496	0.755851	0.104131	0.05539	1.71017	0.744546	4.34732	0.609119	30.8775	898.59	1.09646	1.46768	1.71017	0.536882	0.22615	0.558733	0.0434685	4.3487	0.343421	4.31164	0.458883	30.7695	892.874	1.03772	1.5732	4.3487	0.695778	0.0547876	0.291216	2.76e-06	7	942	c
863	673	99	14.4908	3.33533	7.98505	21.1978	355.298	611.764	37.6879	0.690535	0.186716	0.0400348	1.48653	0.848284	5.89905	0.637069	31.1181	913.741	1.19097	1.54987	1.48653	0.515083	0.306624	0.655378	0.0281263	3.84864	0.571703	5.49295	0.487587	30.8793	897.548	1.1568	1.69173	3.84864	0.681058	0.120245	0.441151	2.19e-06	6	1438	c
864	354	67	10.6702	2.95591	6.44199	16.0607	427.756	618.673	32.3977	0.887799	0.356663	0.0416406	1.11145	0.850214	4.71013	0.65517	33.0853	1033.66	1.149	1.4639	1.11145	0.453105	0.328131	0.661125	0.0295437	2.84768	0.618624	4.73343	0.498103	33.0066	1028.6	1.12375	1.60566	2.84768	0.615774	0.159669	0.493124	2.54e-06	7	427	c
865	519	78	12.5078	2.39567	8.24203	16.8525	397.331	626.796	32.3905	0.75596	0.378879	0.0678247	0.805584	0.800176	3.01574	0.715646	35.9142	1226.57	0.995449	1.25232	0.805584	0.410495	0.291733	0.589928	0.0491825	1.72088	0.565951	2.98236	0.586361	35.9319	1228.28	0.97373	1.37757	1.72088	0.528825	0.122753	0.406033	2.35e-06	9	2294	c
866	534	91	12.7751	3.05371	7.64312	18.8519	376.668	643.818	35.6448	0.813516	-0.0540305	0.0481281	1.50506	0.774342	4.33482	0.637357	30.9328	900.18	1.12763	1.48784	1.50506	0.514603	0.258837	0.597896	0.0353206	3.78603	0.403904	4.17568	0.501829	30.8122	893.317	1.07336	1.6073	3.78603	0.666626	0.0762381	0.345851	2e-06	6	2294	c
867	558	75	12.9642	1.69518	9.83748	16.3858	351.026	657.01	30.8421	0.629649	-0.122442	0.150121	0.633763	0.680807	1.99276	0.772741	26.8732	680.88	0.843494	1.05558	0.633763	0.378453	0.24915	0.509408	0.128034	1.05488	0.427737	1.92167	0.69609	26.8882	683.104	0.802359	1.10681	1.05488	0.456986	0.0992843	0.330445	1.6e-06	4	2294	c
868	482	83	12.0829	1.92744	7.18182	17.1289	383.752	670.448	28.7734	0.609005	-0.860616	0.0447529	1.43705	0.824828	5.10182	0.677214	32.1835	977.057	1.16603	1.49789	1.43705	0.487176	0.314347	0.654238	0.0327495	3.14183	0.602849	4.95546	0.562796	32.1707	975.799	1.13651	1.61749	3.14183	0.612776	0.166805	0.504964	1.63e-06	6	1347	c
869	712	88	14.7041	1.82726	10.3696	18.2354	407.013	671.116	34.6313	0.574795	1.1902	0.0441917	1.2216	0.871244	5.74387	0.679859	30.5683	880.697	1.1924	1.50846	1.2216	0.468518	0.347075	0.685025	0.0367466	2.80757	0.688457	5.50591	0.555855	30.3912	869.563	1.16196	1.61526	2.80757	0.613793	0.180013	0.52298	1.71e-06	7	1347	c
870	685	99	14.7438	3.46116	7.46122	21.8256	453.429	681.508	39.6883	0.774184	0.0988463	0.0821675	0.507393	0.878436	3.08693	0.778054	35.9253	1226.81	1.01153	1.18221	0.507393	0.33939	0.41331	0.678119	0.0555215	1.19802	0.696186	2.97164	0.624752	35.7822	1216.38	1.00155	1.32793	1.19802	0.45828	0.199769	0.505231	1.5e-06	4	1992	c
871	740	103	15.3287	3.45473	9.06919	21.9575	437.316	457.963	40.7943	0.774156	0.0160593	0.0693524	0.63031	0.859741	3.24694	0.74748	34.5958	1133.41	1.05395	1.26213	0.63031	0.372105	0.383972	0.671612	0.046698	1.4908	0.671267	3.26749	0.598123	34.454	1124.16	1.03866	1.42141	1.4908	0.498983	0.183558	0.499696	2.15e-06	5	2852	c
872	468	78	12.3318	2.63378	7.8726	18.2772	470.629	479.536	34.0817	0.818471	0.0852299	0.132473	0.598827	0.749059	2.19316	0.766745	29.2604	810.417	0.865992	1.07473	0.598827	0.369524	0.28242	0.545644	0.109131	1.0801	0.564222	2.23928	0.661499	29.3075	813.568	0.852422	1.16813	1.0801	0.454299	0.154612	0.421631	2.46e-06	6	2852	c
873	611	87	13.4951	1.87084	8.34551	17.1254	451.597	500.403	31.7137	0.552962	-0.231986	0.064628	0.723581	0.859326	3.57184	0.726245	34.2834	1112.82	1.06811	1.30387	0.723581	0.392392	0.358284	0.658763	0.0433125	1.79104	0.637874	3.47296	0.573837	34.2201	1108.79	1.04345	1.45528	1.79104	0.535725	0.150673	0.459474	2.65e-06	7	2852	c
874	513	80	12.4415	2.14552	7.86731	16.0303	415.534	488.327	31.7738	0.704	1.42793	0.0416932	1.28184	0.836857	4.92858	0.662746	32.4134	990.358	1.17356	1.51188	1.28184	0.48723	0.318597	0.66041	0.0274328	3.20721	0.585236	4.86631	0.498097	32.1982	976.611	1.14416	1.67044	3.20721	0.631042	0.135133	0.463696	2.48e-06	6	2083	c
875	525	88	12.9007	3.04427	8.19418	18.6025	417.078	544.316	34.6634	0.802628	1.34966	0.111503	1.18606	0.764206	3.51503	0.72362	30.287	866.221	1.00655	1.26424	1.18606	0.469727	0.309361	0.608606	0.101482	2.50787	0.37653	3.01122	0.638162	30.009	851.008	0.932004	1.3114	2.50787	0.579988	0.134606	0.415245	2.87e-06	8	2083	c
876	368	63	10.4912	1.18575	8.26954	13.1495	442.354	572.241	24.9858	0.608974	0.675044	0.0422451	1.23015	0.82466	4.50789	0.656508	33.4919	1059.51	1.13899	1.47809	1.23015	0.476726	0.288949	0.626893	0.0325341	3.11218	0.535611	4.35084	0.519215	33.3109	1048.15	1.09506	1.59228	3.11218	0.637857	0.111958	0.414826	2.91e-06	7	1008	c
877	509	76	12.3296	1.92142	8.30263	15.1757	461.523	568.636	31.3432	0.718424	1.45636	0.0597027	1.60283	0.755437	4.27694	0.663435	30.0876	851.024	1.11316	1.45591	1.60283	0.522288	0.26496	0.599135	0.0450838	3.84821	0.428761	4.3683	0.540015	30	845.747	1.08422	1.56581	3.84821	0.662741	0.124039	0.432472	2.93e-06	6	1008	c
878	337	67	10.568	2.95496	5.50748	16.2629	515.182	507.353	31.2701	0.874713	0.991004	0.0289656	2.06829	0.799092	6.14737	0.563925	32.4553	994.148	1.22026	1.66088	2.06829	0.561147	0.245332	0.609518	0.0236134	5.80702	0.443145	6.21412	0.418307	32.2772	982.482	1.17362	1.78109	5.80702	0.746868	0.0963561	0.406183	2.77e-06	6	1067	c
879	518	90	12.4655	3.32046	4.32406	18.5577	512.463	529.949	34.2256	0.737628	-0.382232	0.0782522	0.711749	0.817878	2.95404	0.73436	35.5305	1199.15	1.00451	1.22972	0.711749	0.392947	0.334352	0.624205	0.056853	1.73846	0.567749	3.01094	0.596962	35.4571	1194.65	0.984714	1.36277	1.73846	0.535333	0.136762	0.42581	2.87e-06	8	1067	c
880	449	75	11.7279	1.8221	9.32617	15.7287	506.832	569.385	29.7662	0.735051	0.677089	0.0777092	1.02098	0.744779	3.00019	0.708425	32.7116	1011.87	1.01157	1.30018	1.02098	0.450125	0.272584	0.580148	0.0562656	2.37696	0.392325	2.95579	0.561135	32.6702	1010.38	0.969508	1.42183	2.37696	0.590759	0.0730594	0.319699	2.85e-06	7	1951	c
881	655	97	13.8608	2.27459	8.29818	17.8223	531.753	571.042	34.2311	0.601314	0.848805	0.0446136	0.812806	0.899953	5.06213	0.697292	33.033	1031.59	1.1559	1.41568	0.812806	0.402909	0.395087	0.708467	0.0292009	2.23909	0.728891	5.1295	0.526646	32.7487	1013.14	1.14391	1.59268	2.23909	0.568475	0.197601	0.542919	2.76e-06	6	1951	c
882	596	85	13.6223	2.92409	8.85047	18.7877	516.264	591.561	37.9363	0.833476	0.333308	0.0596083	0.885063	0.833902	3.66427	0.711431	33.4817	1059.41	1.08354	1.35086	0.885063	0.427091	0.330481	0.643596	0.0433444	2	0.600806	3.50505	0.579697	33.4231	1056.14	1.04844	1.46993	2	0.551761	0.146106	0.454763	2.68e-06	9	1951	c
883	315	63	9.70948	1.78826	5.87741	12.6568	600.975	582.478	24.7169	0.729525	0.311576	0.0967481	0.816362	0.703023	2.37445	0.731398	25.6623	617.655	0.904014	1.15324	0.816362	0.413581	0.232205	0.511248	0.0731719	1.63529	0.416455	2.40117	0.585952	25.8627	627.995	0.882234	1.2475	1.63529	0.513874	0.0742698	0.302887	2.18e-06	6	7653	c
884	678	96	14.8041	2.91928	8.78348	20.4563	648.522	560.188	37.7274	0.758921	0.757288	0.0477288	0.920204	0.882038	4.90043	0.716339	33.616	1068.36	1.1556	1.42784	0.920204	0.42684	0.373336	0.693375	0.0325855	2.15979	0.699139	4.58936	0.569834	33.4347	1055.73	1.13093	1.56888	2.15979	0.56141	0.18599	0.524494	1.6e-06	5	2665	c
885	594	98	13.3912	3.20741	5.86757	17.7632	570.473	484.915	33.4613	0.558481	1.49408	0.124779	0.51317	0.739999	1.98686	0.792461	30.5858	887.494	0.852681	1.02497	0.51317	0.345088	0.296319	0.547639	0.096644	0.944	0.513402	1.97	0.6792	30.4	876.819	0.838489	1.11724	0.944	0.427321	0.129003	0.377867	2.57e-06	9	2905	c
886	762	111	15.4299	4.13244	8.96462	22.3156	611.107	379.945	46.0464	0.867248	0.0299505	0.0471798	1.26993	0.849736	5.22566	0.657553	33.2294	1044.01	1.1611	1.4867	1.26993	0.485988	0.314941	0.652955	0.0390716	2.8928	0.598671	4.60403	0.531405	32.709	1010.19	1.10741	1.58547	2.8928	0.62041	0.134116	0.451457	1.86e-06	3	2690	c
887	638	93	13.8374	2.95185	6.96506	19.5782	589.303	356.693	36.1571	0.724344	0.151575	0.115244	0.572567	0.739086	2.09723	0.776073	28.982	793.704	0.877015	1.07501	0.572567	0.362231	0.280134	0.543553	0.090261	1.12268	0.460791	2.04104	0.654494	28.7993	784.673	0.841584	1.17283	1.12268	0.457459	0.100023	0.340832	1.95e-06	3	2690	c
888	477	72	11.9882	2.33763	8.34744	15.8732	547.013	356.126	32.2833	0.804063	-0.212547	0.116065	0.665359	0.701042	2.1128	0.752074	37.2158	1323.53	0.887533	1.10609	0.665359	0.384782	0.246153	0.516629	0.0825753	1.45346	0.327649	2.08088	0.616271	37.0907	1316.98	0.840033	1.215	1.45346	0.499344	0.0585956	0.265928	2.03e-06	2	498	c
889	454	76	11.8006	3.29597	4.0831	17.4005	553.063	325.826	33.3166	0.787512	-1.02878	0.0691938	0.823004	0.811341	3.18119	0.725005	25.941	627.843	1.04239	1.29971	0.823004	0.416369	0.315768	0.621088	0.0521849	1.77895	0.564929	3.04443	0.609188	25.7263	617.78	1.0002	1.41319	1.77895	0.529989	0.141467	0.439965	2.02e-06	5	1468	c
890	390	74	11.1336	3.00954	5.23231	17.1101	518.161	339.974	32.4331	0.826497	-0.541346	0.0343812	1.50314	0.874543	6.99068	0.624997	33.7645	1081.16	1.22682	1.5895	1.50314	0.513526	0.33297	0.6856	0.0224289	4.05247	0.656811	6.90413	0.449104	33.4722	1060.17	1.21386	1.74517	4.05247	0.677113	0.166776	0.521589	1.97e-06	5	1468	c
891	611	81	13.9156	2.90708	9.2711	18.951	544.948	300.461	39.1713	0.80904	-0.802223	0.0334188	2.00522	0.894323	10.4875	0.586769	28.8268	794.116	1.2919	1.69038	2.00522	0.560081	0.330513	0.698521	0.0260608	5.79558	0.689332	10.3276	0.443269	28.3702	766.419	1.26105	1.81178	5.79558	0.751814	0.171364	0.536584	2.02e-06	7	647	c
892	657	89	14.7039	3.98304	6.76305	20.522	508.721	294.123	43.2234	0.862836	-0.647717	0.041463	1.25041	0.878757	6.15662	0.655073	33.2998	1049.55	1.20353	1.52576	1.25041	0.479223	0.35777	0.696864	0.0277196	3.42782	0.644062	5.81518	0.490132	32.882	1021.31	1.17272	1.68349	3.42782	0.648185	0.156297	0.498306	2.07e-06	7	683	c
893	711	92	14.8229	2.27724	10.7939	19.3309	475.626	327.783	35.6295	0.662811	-1.03225	0.114989	0.57052	0.747801	2.13109	0.780284	30.5458	883.792	0.883766	1.0826	0.57052	0.363443	0.296527	0.560371	0.0832552	1.23401	0.452516	2.12698	0.655658	30.5757	886.074	0.863708	1.20555	1.23401	0.473232	0.103729	0.351516	1.88e-06	5	1035	c
894	554	88	13.4312	4.24013	7.19842	20.314	356.226	135.018	42.5219	0.913868	1.34042	0.0804089	0.684746	0.80108	2.72116	0.738983	37.2203	1319.04	0.987235	1.21011	0.684746	0.385026	0.312832	0.601312	0.0507882	1.83333	0.507991	2.86311	0.582826	37.1382	1313.35	0.975604	1.38986	1.83333	0.540731	0.101988	0.372486	1.09e-06	2	729	c
895	681	86	14.79	3.01147	9.99184	20.5285	163.019	161.038	41.4039	0.829952	-0.892008	0.0361733	1.83353	0.85595	7.36422	0.632488	29.7783	837.18	1.25538	1.63254	1.83353	0.529669	0.327494	0.687282	0.0257969	4.8408	0.602253	7.08527	0.481376	29.4411	816.013	1.21858	1.77391	4.8408	0.693745	0.16314	0.519888	1.22e-06	8	3005	c
896	689	94	14.6517	3.16992	10.0421	19.8653	105.34	191.619	41.0178	0.830275	-1.44931	0.0489593	1.01885	0.887009	5.50854	0.710444	33.2574	1045.27	1.19094	1.46828	1.01885	0.449181	0.393633	0.716274	0.0331521	2.41818	0.717235	5.27596	0.562629	32.9074	1021.95	1.16997	1.62499	2.41818	0.59454	0.198183	0.548229	1.16e-06	7	754	c
897	597	92	14.7754	4.94425	6.02634	22.7752	177.473	183.192	46.0963	0.923019	-0.993266	0.0869269	0.728623	0.808495	2.90236	0.746876	36.2597	1250.5	0.994689	1.2193	0.728623	0.398478	0.32361	0.612752	0.0633264	1.66795	0.561983	2.90398	0.606586	36.1158	1240.42	0.980734	1.35144	1.66795	0.524195	0.133687	0.419549	1.23e-06	8	3005	c
898	627	89	14.0544	3.6277	8.98243	20.4156	348.499	247.27	41.1207	0.873054	-1.45701	0.115921	0.537383	0.763883	2.13796	0.782795	29.1219	800.93	0.892224	1.07896	0.537383	0.353736	0.311197	0.572798	0.0847718	0.981718	0.560154	2.11598	0.669287	28.9525	792.238	0.867679	1.16819	0.981718	0.432582	0.15516	0.422374	1.1e-06	3	1800	c
899	612	92	14.0394	3.76294	7.4867	19.9561	241.457	248.85	41.835	0.875973	-1.34523	0.0563555	1.02486	0.890064	5.66114	0.709648	34.5233	1131.27	1.15191	1.43816	1.02486	0.44752	0.38017	0.700626	0.0384788	2.81701	0.682577	5.43731	0.551219	34.159	1106.02	1.12728	1.58797	2.81701	0.613995	0.179987	0.519172	1.19e-06	3	615	c
900	401	89	12.4346	4.81055	3.59524	21.8489	257.571	279.349	41.5019	0.931412	-1.40807	0.0943362	0.548587	0.819345	2.51833	0.767884	28.4838	764.237	0.939067	1.12539	0.548587	0.351213	0.346954	0.613598	0.0613304	1.41284	0.579317	2.67923	0.609174	28.2446	751.196	0.933634	1.29584	1.41284	0.49285	0.155966	0.443666	1.23e-06	5	5103	c
901	786	109	15.7841	2.75984	10.4284	22.0518	252.466	336.261	37.6767	0.549378	-1.27998	0.0368562	1.18849	0.916418	8.10971	0.695028	31.5025	941.062	1.27321	1.582	1.18849	0.475162	0.414021	0.749791	0.0246343	3.22475	0.779023	8.29656	0.546096	31.2532	924.826	1.27213	1.73705	3.22475	0.630267	0.252467	0.628191	1.38e-06	6	5103	c
902	639	97	14.5266	4.55742	5.8515	22.4034	59.6964	444.477	44.9702	0.881715	-1.0704	0.124624	0.424497	0.814909	2.14673	0.806376	31.4656	938.673	0.895834	1.04076	0.424497	0.316076	0.373601	0.616498	0.0900677	1.01087	0.565406	2.163	0.68587	31.2826	928.295	0.874479	1.18487	1.01087	0.448261	0.160649	0.432387	9.8e-07	2	1788	c
903	460	78	12.3549	3.64929	6.46887	19.7685	191.521	455.781	37.0382	0.892286	-1.21455	0.150747	0.509412	0.664722	1.75969	0.789765	31.5259	946.631	0.799639	0.977728	0.509412	0.34577	0.240926	0.484723	0.113806	0.964912	0.381991	1.78066	0.679596	31.416	940.742	0.77971	1.07597	0.964912	0.432554	0.0791089	0.291223	1.48e-06	6	1688	c
904	570	82	13.2575	1.99946	9.69828	17.8478	222.501	438.535	32.1961	0.632998	-1.34218	0.0523284	0.90099	0.852431	4.05277	0.693643	35.7166	1210.04	1.0939	1.37173	0.90099	0.425779	0.334292	0.650683	0.0336726	2.39876	0.608764	4.06562	0.530555	35.3988	1187.9	1.07621	1.53607	2.39876	0.587127	0.132075	0.441868	1.51e-06	6	1688	c
905	740	96	15.4502	3.39601	8.51572	22.375	321.313	440.424	41.66	0.814204	-0.85966	0.0835465	0.647016	0.842363	3.05224	0.782143	29.3949	813.291	1.00957	1.21926	0.647016	0.375958	0.378133	0.658516	0.0563743	1.2879	0.701427	3.15676	0.655423	29.3216	808.491	1.01697	1.35812	1.2879	0.4789	0.221024	0.535191	1.35e-06	3	3194	c
906	455	74	12.3719	3.07785	7.15681	19.0221	284.006	475.933	33.5922	0.817651	-0.531231	0.121004	0.482738	0.782834	2.11145	0.799261	30.4399	877.958	0.876477	1.03958	0.482738	0.335692	0.336319	0.585795	0.0791891	0.994924	0.603973	2.25613	0.682234	30.3503	871.772	0.892782	1.18419	0.994924	0.438243	0.159209	0.430375	1.36e-06	5	908	c
907	542	104	11.549	4.3734	1.97937	17.1395	644.158	414.287	32.3944	0.591823	0.0536691	0.183108	0.40404	0.698249	1.66949	0.813737	33.4202	1069.43	0.752867	0.888427	0.40404	0.309052	0.276856	0.498349	0.131	0.838565	0.393942	1.69182	0.699103	33.3274	1063.96	0.738562	1.00977	0.838565	0.412834	0.0842781	0.29157	1.25e-06	3	1522	c
908	587	92	13.5317	1.94631	9.87182	18.1197	645.011	442.05	32.5335	0.645962	-1.1501	0.081688	0.632755	0.866985	3.37852	0.750411	37.8663	1364.68	1.04522	1.24608	0.632755	0.374544	0.394394	0.676627	0.060888	1.62188	0.643361	3.27384	0.62126	37.6987	1353.62	1.00872	1.37739	1.62188	0.524969	0.178542	0.486459	1.3e-06	5	1522	c
909	438	66	11.4745	1.65808	7.9845	14.7513	497.811	493.364	28.6126	0.690578	-1.28451	0.098828	0.492336	0.832507	2.46972	0.786205	29.9418	846.553	0.938878	1.10703	0.492336	0.337421	0.37584	0.633176	0.0674807	1.10554	0.638003	2.527	0.649868	29.7757	836.446	0.940957	1.25969	1.10554	0.451252	0.180204	0.469887	1.27e-06	3	816	c
910	537	88	12.5551	2.4282	6.22562	16.5559	460.63	461.426	31.2496	0.607752	-0.947386	0.0380431	1.09497	0.887405	5.86245	0.68063	34.6638	1138.12	1.20089	1.51021	1.09497	0.458223	0.364887	0.700248	0.0257026	2.91447	0.692739	5.74267	0.526876	34.2785	1111.19	1.18568	1.67571	2.91447	0.617978	0.173096	0.521596	1.22e-06	6	976	c
911	728	91	14.7484	1.63249	10.5271	17.7531	414.83	479.892	32.408	0.271656	0.221265	0.0609569	0.784157	0.860273	3.80604	0.718677	35.0741	1164.48	1.10293	1.3419	0.784157	0.406018	0.369749	0.675235	0.0393364	2.10959	0.630743	3.85653	0.554912	34.9041	1153.02	1.08537	1.515	2.10959	0.554149	0.158306	0.478847	1.22e-06	5	734	c
912	693	110	14.9272	3.58377	8.78259	20.8066	178.829	633.286	40.6932	0.783385	1.41853	0.127397	0.449473	0.780215	2.02253	0.795396	39.6933	1511.83	0.857938	1.0114	0.449473	0.322357	0.329369	0.573477	0.0817679	1.07131	0.522447	2.12166	0.649506	39.5976	1503.48	0.86692	1.18536	1.07131	0.44223	0.122918	0.3792	1.23e-06	7	6260	c
913	700	89	14.9905	3.5248	9.43189	21.096	268.819	609.464	42.1245	0.826608	-1.06894	0.0371701	1.00985	0.915626	6.98438	0.678591	33.5464	1065.78	1.25316	1.54778	1.00985	0.435482	0.411328	0.742519	0.0234067	2.86378	0.759626	6.95693	0.500767	33.2099	1042.67	1.24581	1.73278	2.86378	0.611924	0.218085	0.587937	1.26e-06	4	763	c
914	761	107	16.0003	5.32219	5.65291	24.6477	237.968	643.981	52.1641	0.914532	-0.0829822	0.0440115	0.800419	0.923217	6.21223	0.704229	35.5128	1197.87	1.19339	1.44483	0.800419	0.40427	0.434436	0.742637	0.0277158	2.48132	0.757035	6.10633	0.534701	35.1749	1173.33	1.18394	1.64023	2.48132	0.595991	0.224222	0.582357	1.29e-06	4	1556	c
915	677	91	14.3332	2.00621	10.0486	17.9809	230.25	675.562	35.1557	0.656858	-1.54699	0.0482099	0.976881	0.891001	5.48116	0.679373	36.7723	1284.68	1.16704	1.46404	0.976881	0.437747	0.359333	0.688035	0.0324749	2.90847	0.680493	5.55151	0.513409	36.3356	1253.71	1.14444	1.62662	2.90847	0.623174	0.155672	0.490018	1.28e-06	5	1556	c
916	642	95	14.7636	4.15191	8.94878	22.9263	288.654	646.911	44.3251	0.896762	-1.25868	0.0545229	1.02121	0.840086	4.193	0.683833	35.7101	1209.1	1.1074	1.40263	1.02121	0.449986	0.319403	0.642843	0.0352341	2.98927	0.532615	4.19786	0.516918	35.3399	1183.56	1.07977	1.57383	2.98927	0.63038	0.102482	0.395393	1.32e-06	5	721	c
917	468	88	13.1962	4.87387	5.6522	22.4316	301.987	687.44	43.3042	0.94287	-1.24066	0.141198	0.600233	0.634828	1.82185	0.771829	31.2249	927.615	0.812315	1.01781	0.600233	0.368804	0.217206	0.468666	0.103526	1.26131	0.314368	1.91981	0.646024	31.1558	924.104	0.796499	1.14802	1.26131	0.481871	0.0529504	0.246032	1.35e-06	10	5112	c
918	472	83	13.1004	4.97871	5.15912	20.8336	354.979	649.02	44.4386	0.943323	-0.634942	0.100678	0.577675	0.792989	2.39528	0.754661	29.8205	839.704	0.929307	1.11888	0.577675	0.355611	0.330235	0.59801	0.0665922	1.38579	0.516634	2.43348	0.605584	29.5584	824.845	0.914053	1.28041	1.38579	0.485111	0.120982	0.389879	1.34e-06	6	5112	c
919	792	119	16.6248	4.38806	7.79948	25.2897	897.216	574.864	44.762	0.822083	-1.08473	0.0751333	0.735811	0.890559	4.36167	0.745203	34.3318	1116.51	1.10835	1.33931	0.735811	0.400588	0.405445	0.702803	0.0526493	1.99007	0.698134	4.29629	0.603143	34.2567	1111.1	1.09193	1.4953	1.99007	0.561587	0.198665	0.530048	9.36e-07	6	6518	c
920	319	67	10.2761	3.16265	4.59527	16.641	994.02	583.802	31.6902	0.888278	1.38598	0.0945722	0.656871	0.821939	2.84452	0.742092	28.6465	773.323	0.958926	1.16905	0.656871	0.378231	0.344637	0.620803	0.0945938	1.5206	0.608335	2.9412	0.635206	28.6442	775.009	0.917592	1.23155	1.5206	0.516393	0.165406	0.446253	5.44e-07	3	2947	c
921	458	77	11.8142	2.62237	6.74031	16.3032	968.498	574.017	31.8783	0.786099	1.35429	0.111779	0.51119	0.789077	2.21179	0.784688	25.5018	609.738	0.896857	1.06215	0.51119	0.344499	0.349962	0.602265	0.0905069	0.98153	0.557171	2.10825	0.673879	25.3034	600.857	0.861555	1.14808	0.98153	0.437447	0.159418	0.424676	6.65e-07	4	2947	c
922	619	84	13.6524	1.83263	9.4738	16.4009	974.607	601.928	31.2035	0.458216	1.54653	0.0744506	0.724345	0.840082	3.26474	0.730056	23.9601	534.762	1.01607	1.23768	0.724345	0.394011	0.352058	0.64086	0.0534697	1.70718	0.632269	3.32124	0.584368	23.8766	530.85	1.00147	1.36731	1.70718	0.52456	0.161719	0.462409	6.35e-07	3	2947	c
923	691	92	14.8197	3.89991	8.68244	21.4109	930.81	543.895	43.5385	0.882742	-1.27461	0.131089	0.473482	0.779633	2.0743	0.807994	31.1476	921.408	0.855922	1.0184	0.473482	0.334705	0.333347	0.578455	0.102173	0.907895	0.572228	2.06119	0.69582	31.1776	923.436	0.844498	1.11665	0.907895	0.422164	0.151065	0.408399	8.16e-07	5	6518	c
924	713	108	14.8987	2.92091	9.0189	21.2422	905.747	539.607	38.5772	0.722437	-1.22642	0.0598955	0.749062	0.880019	4.12158	0.725738	34.575	1132.05	1.10396	1.33827	0.749062	0.39918	0.3913	0.691736	0.0432013	1.69643	0.721285	4.04331	0.586254	34.3588	1117.67	1.08432	1.47501	1.69643	0.524615	0.209556	0.540346	8.94e-07	4	6518	c
925	792	119	16.6248	4.38806	7.79948	25.2897	897.216	574.864	44.762	0.822083	-1.08473	0.0751333	0.735811	0.890559	4.36167	0.745203	34.3318	1116.51	1.10835	1.33931	0.735811	0.400588	0.405445	0.702803	0.0526493	1.99007	0.698134	4.29629	0.603143	34.2567	1111.1	1.09193	1.4953	1.99007	0.561587	0.198665	0.530048	9.36e-07	6	6518	c
926	672	92	14.3027	2.92754	8.22263	18.8375	866.43	570.44	38.78	0.765883	1.46687	0.0735501	1.18505	0.86518	5.39494	0.683574	32.0652	974.842	1.10645	1.39447	1.18505	0.476876	0.341509	0.660979	0.0556373	3.28739	0.606678	5.17901	0.556692	31.6773	948.954	1.09096	1.50933	3.28739	0.648995	0.146211	0.460288	1.01e-06	6	6518	c
927	764	113	16.44	5.97671	3.59516	26.3571	843.062	582.584	53.4778	0.905327	1.31838	0.041745	1.36214	0.858658	5.81859	0.671548	32.5574	1001.01	1.20294	1.537	1.36214	0.497116	0.336604	0.680559	0.026836	3.8649	0.605039	5.89276	0.519236	32.42	991.003	1.19023	1.7161	3.8649	0.667413	0.150761	0.494041	1.05e-06	6	6518	c
928	418	79	11.9622	3.80772	4.87856	19.2414	800.271	613.233	36.8268	0.888694	0.843679	0.0473963	1.484	0.817139	5.05773	0.656593	33.6473	1070.3	1.15803	1.52272	1.484	0.506649	0.283856	0.629067	0.0350554	3.64407	0.541519	4.97407	0.520459	33.3785	1053.81	1.10528	1.63346	3.64407	0.66583	0.148926	0.480761	1.08e-06	5	2428	c
929	664	99	13.9504	1.98914	8.93094	17.6273	782.328	632.024	31.2376	0.404094	-1.14974	0.0653184	0.754732	0.906527	5.03717	0.726796	36.6355	1277.35	1.11145	1.35452	0.754732	0.400077	0.392826	0.695885	0.0519088	1.85812	0.766701	4.98228	0.59902	36.535	1270.09	1.09466	1.49421	1.85812	0.543839	0.216656	0.551774	1.07e-06	5	2428	c
930	699	95	14.6216	2.61874	8.42697	19.6006	791.626	660.889	37.1548	0.709375	-1.06189	0.103541	0.606003	0.853548	3.06894	0.766755	34.8233	1152.76	0.984178	1.17905	0.606003	0.371649	0.381816	0.653247	0.0843349	1.39771	0.619963	2.83891	0.641663	34.527	1134.14	0.938518	1.27815	1.39771	0.502055	0.157589	0.443169	1.03e-06	5	2428	c
931	538	82	12.9156	3.00128	7.17352	17.9517	758.453	658.277	36.7319	0.835149	-1.52973	0.0603837	1.00248	0.845021	4.23426	0.691692	34.6021	1132.84	1.12211	1.39675	1.00248	0.448073	0.341293	0.661191	0.0448035	2.57627	0.583213	4.09063	0.543727	34.3347	1115.44	1.08333	1.52762	2.57627	0.603941	0.134505	0.444648	1.03e-06	4	551	c
932	588	92	13.6108	2.63284	8.50382	19.2453	668.923	707.968	34.7595	0.737374	-0.934586	0.162989	0.38754	0.730576	1.7192	0.818873	33.7948	1092.23	0.783498	0.913728	0.38754	0.303357	0.304654	0.529075	0.118544	0.827309	0.447284	1.7484	0.699598	33.6988	1086.06	0.776257	1.04693	0.827309	0.407812	0.0932869	0.312043	9.99e-07	3	2500	c
933	777	112	16.3295	5.44366	8.39582	25.9623	917.95	766.386	51.7514	0.915742	1.178	0.0969162	0.591753	0.817656	2.62262	0.790175	28.6818	774.216	0.963244	1.15872	0.591753	0.363349	0.361989	0.633076	0.0702061	0.980333	0.702428	2.64722	0.683901	28.4992	763.292	0.973186	1.26312	0.980333	0.43363	0.228373	0.527199	8.88e-07	6	4524	c
934	677	98	14.2052	2.9126	7.6482	19.7175	955.399	715.219	37.8999	0.778393	0.0233796	0.167141	0.424911	0.744543	1.83167	0.8216	28.7607	785.035	0.794102	0.932567	0.424911	0.316127	0.326589	0.552371	0.117724	0.837705	0.528944	1.88918	0.707049	28.7426	783.156	0.806317	1.06413	0.837705	0.416871	0.135149	0.378064	7.75e-07	3	4659	c
935	582	91	13.2434	2.45493	7.91319	18.172	979.387	787.389	29.3441	0.202031	-0.18267	0.0625716	0.797603	0.879478	4.30895	0.733588	34.9239	1157.37	1.08712	1.33816	0.797603	0.411184	0.376778	0.680228	0.0451828	2.10609	0.692247	4.42172	0.604649	34.888	1155.44	1.06703	1.48636	2.10609	0.56245	0.2026	0.533591	5.97e-07	3	4659	c
936	747	123	15.8952	4.88353	8.53063	26.6118	988.003	264.282	48.3895	0.872676	-0.490627	0.0961458	0.430636	0.886989	2.90528	0.808526	30.1481	858.41	0.972448	1.11639	0.430636	0.32007	0.441563	0.684695	0.0684472	0.869565	0.763881	2.84137	0.688199	30.0311	850.452	0.980131	1.23667	0.869565	0.414987	0.266012	0.561919	8.01e-07	6	5988	c
937	509	80	12.6828	2.84354	7.41604	18.6453	889.857	342.169	34.5009	0.798301	0.176304	0.0989092	0.575758	0.789156	2.36537	0.769537	30.2451	864.414	0.927373	1.11501	0.575758	0.362346	0.34464	0.609437	0.0688988	1.21277	0.57158	2.4154	0.65461	30.13	858.032	0.913875	1.25175	1.21277	0.477807	0.146867	0.424226	1.14e-06	5	5988	c
938	512	86	12.9933	3.98334	5.40719	19.4585	882.73	61.3844	39.9846	0.891827	-0.330404	0.074967	0.700949	0.838847	3.17479	0.75135	28.048	738.768	1.01525	1.24544	0.700949	0.392196	0.348265	0.639188	0.0527628	1.34633	0.687213	3.15215	0.62554	27.8968	730.333	1.00682	1.37478	1.34633	0.481341	0.193549	0.505142	8.18e-07	4	851	c
939	567	87	13.4407	2.99347	7.8744	20.3132	813.715	37.0587	35.542	0.76094	-1.40473	0.0637934	0.747756	0.858429	3.64092	0.742824	36.5371	1267.45	1.07398	1.31395	0.747756	0.403781	0.371924	0.67184	0.0443251	1.66667	0.675277	3.56629	0.607909	36.3537	1254.7	1.05352	1.45241	1.66667	0.524011	0.190535	0.513344	7.81e-07	3	2807	c
940	632	84	13.8971	2.048	9.92526	17.8975	773.659	32.4427	35.1993	0.716265	-0.882801	0.0568062	0.849286	0.884194	4.66686	0.735237	35.1087	1167.24	1.14673	1.40193	0.849286	0.418293	0.39929	0.709312	0.0384998	2.35201	0.688193	4.77158	0.59353	35.035	1161.66	1.1392	1.56668	2.35201	0.574111	0.211861	0.556889	7.74e-07	6	1726	c
941	646	87	14.1357	2.39616	10.1959	19.0861	800.365	63.8889	36.5368	0.768068	0.0499705	0.0797806	0.657261	0.83859	3.03601	0.762314	37.8697	1366.51	1.0048	1.22046	0.657261	0.381397	0.356248	0.640951	0.0621615	1.3646	0.655907	2.9829	0.644587	37.8283	1364.41	0.979408	1.31929	1.3646	0.491541	0.19501	0.498034	9.62e-07	7	2807	c
942	598	108	13.5774	3.18269	6.78486	20.9743	774.449	78.1934	34.5658	0.687359	1.56893	0.0642248	0.906618	0.854246	4.1101	0.73319	37.7625	1355.93	1.09646	1.34711	0.906618	0.416566	0.366818	0.673793	0.0453441	1.82157	0.679809	3.8445	0.589462	37.8059	1359.57	1.06333	1.45949	1.82157	0.523261	0.199141	0.525232	1.03e-06	7	2807	c
943	661	103	14.4416	3.22074	9.01231	22.0209	473.65	66.3867	38.5836	0.774781	1.521	0.177902	0.334959	0.800284	1.83859	0.841301	33.1341	1048.55	0.799411	0.910415	0.334959	0.284984	0.387501	0.59531	0.116699	0.712544	0.611045	1.91597	0.727352	33.0714	1042.85	0.823967	1.05768	0.712544	0.386511	0.187801	0.443682	1.18e-06	7	1590	c
944	563	97	13.9656	4.55642	6.53587	21.4158	401.477	131.399	44.6832	0.920588	1.33661	0.129448	0.443645	0.830546	2.30904	0.80753	33.3866	1060.4	0.896499	1.05051	0.443645	0.325399	0.373069	0.618318	0.0908449	0.934021	0.651666	2.3407	0.691049	33.2227	1048.61	0.908858	1.18913	0.934021	0.426686	0.182863	0.461351	1.6e-06	2	2156	c
945	616	102	13.8635	4.22802	4.34265	21.4118	263.029	53.4422	42.1482	0.858994	-1.47395	0.0756448	0.646363	0.834172	2.9489	0.740447	25.6323	613.805	1.00196	1.21848	0.646363	0.373845	0.347647	0.633355	0.0506121	1.56705	0.606385	2.99059	0.591521	25.4828	606.44	0.986955	1.38371	1.56705	0.503301	0.14582	0.442249	1.56e-06	7	1333	c
946	545	81	13.3266	3.12296	8.65929	19.5472	204.026	104.873	37.5782	0.842561	1.08582	0.0371139	1.69484	0.832757	6.06699	0.647302	32.2845	983.49	1.22141	1.59765	1.69484	0.529902	0.310073	0.666039	0.0249366	4.1	0.590924	6.01129	0.499843	31.9596	962.169	1.19882	1.73255	4.1	0.675081	0.162456	0.513681	1.82e-06	8	640	c
947	489	80	12.0948	2.44531	6.16422	17.0242	159.215	108.462	30.8655	0.683906	0.309438	0.108183	0.534435	0.771942	2.17171	0.774435	28.5851	770.702	0.89849	1.07643	0.534435	0.349331	0.316908	0.57729	0.078913	1.22249	0.496067	2.21295	0.65	28.5909	772.609	0.860424	1.19518	1.22249	0.477701	0.109331	0.359302	1.64e-06	6	2272	c
948	790	117	15.7821	4.05168	8.63538	24.1225	116.036	164.823	44.2398	0.767677	1.29511	0.040456	1.41258	0.88676	7.23713	0.644156	32.745	1017.56	1.21687	1.56133	1.41258	0.500995	0.339701	0.687117	0.0277253	3.90778	0.681283	7.13049	0.48978	32.3977	993.986	1.19879	1.7265	3.90778	0.678224	0.155993	0.503299	1.57e-06	4	1388	c
949	424	73	11.7008	3.04288	6.36857	17.055	140.214	188.632	33.5814	0.831344	0.923442	0.0266373	1.75128	0.854094	7.00137	0.58894	32.4533	994.716	1.269	1.67349	1.75128	0.519718	0.307198	0.674706	0.0183882	4.82094	0.606686	7.1286	0.407777	32.1598	975.686	1.24065	1.83641	4.82094	0.699457	0.142427	0.49541	1.68e-06	6	1388	c
950	603	100	15.5221	6.31042	5.16078	25.9733	145.057	282.536	54.0249	0.957337	1.02909	0.0474136	1.5385	0.781295	4.51728	0.644938	31.6952	947.144	1.12372	1.47103	1.5385	0.515877	0.271427	0.608244	0.0339306	3.29746	0.499237	4.29243	0.49738	31.2701	921.315	1.07995	1.59009	3.29746	0.644885	0.0975123	0.387827	1.38e-06	4	713	c
951	397	77	11.748	3.97095	6.46532	18.8696	123.669	283.09	37.655	0.923956	1.29858	0.0636231	2.09547	0.692215	4.4041	0.622922	31.2493	920.889	1.09358	1.48931	2.09547	0.571121	0.214908	0.548949	0.047447	5.58084	0.188278	4.43765	0.507557	30.7725	892.255	1.03889	1.59234	5.58084	0.728246	0.105106	0.402399	1.32e-06	5	493	c
952	279	64	9.42544	2.86661	5.60049	14.5695	104.546	264.48	29.1357	0.890517	1.51837	0.0612653	1.41807	0.693082	3.31018	0.648321	33.4816	1061.42	1.02251	1.3679	1.41807	0.50705	0.206321	0.5196	0.0476349	3.48673	0.237996	3.28787	0.513435	33.0885	1037.64	0.964098	1.46897	3.48673	0.65535	0.0435427	0.251584	1.28e-06	6	402	c
953	573	94	14.3789	4.54496	7.02003	22.9492	88.0648	292.891	44.1467	0.913098	1.25422	0.0594922	1.22311	0.809395	4.2085	0.684134	32.3551	989.342	1.08641	1.39525	1.22311	0.472102	0.290081	0.614099	0.044016	2.62	0.577404	4.09988	0.543366	32.092	973.829	1.04286	1.50202	2.62	0.604297	0.125055	0.426107	1.16e-06	6	1398	c
954	358	85	11.7563	4.926	4.33254	19.8798	69.6756	279.149	42.2017	0.950421	-1.5001	0.0431003	1.80047	0.803922	5.5912	0.619285	32.8191	1020.06	1.14117	1.505	1.80047	0.546651	0.255133	0.596691	0.0316894	5.13514	0.482422	5.96074	0.464362	32.4595	996.747	1.12196	1.62423	5.13514	0.707656	0.0823007	0.360736	1.07e-06	3	1398	c
955	669	124	16.9872	7.84938	4.26613	30.0855	72.8761	338.814	61.7697	0.96394	-1.51994	0.0593344	1.99311	0.69435	4.26045	0.615102	31.3467	927.466	1.07432	1.46223	1.99311	0.565232	0.200403	0.527214	0.0423951	5.4528	0.235538	4.56643	0.478861	30.9948	906.061	1.04065	1.5646	5.4528	0.720524	0.048873	0.27457	1.09e-06	5	2516	c
956	544	86	13.15	3.902	6.2369	19.9602	92.8975	346.753	39.4544	0.878262	-1.19046	0.112085	0.685771	0.689764	2.10524	0.754801	26.7085	670.538	0.885977	1.11471	0.685771	0.389879	0.240758	0.512788	0.078183	1.61523	0.342969	2.22919	0.613333	26.6358	667.351	0.866648	1.25692	1.61523	0.515597	0.0733209	0.302047	1.18e-06	4	2516	c
957	611	95	14.8492	5.03874	8.02471	24.3953	119.836	371.027	46.5362	0.923825	1.17313	0.044496	1.52613	0.807478	4.96352	0.637084	30.913	900.522	1.14403	1.50625	1.52613	0.513986	0.266902	0.609259	0.0304921	4.06203	0.49078	4.98848	0.47917	30.5921	881.018	1.11116	1.66133	4.06203	0.679321	0.0863765	0.373192	1.28e-06	2	2516	c
958	388	72	11.271	3.18984	6.61939	17.0093	164.853	395.936	33.8012	0.879385	1.19835	0.054407	1.04695	0.819114	3.89395	0.669838	33.0764	1033.54	1.09177	1.38843	1.04695	0.449947	0.311149	0.632823	0.0423763	2.57321	0.543183	3.81645	0.525842	32.6106	1005.05	1.04541	1.49894	2.57321	0.598188	0.127415	0.429562	1.45e-06	2	545	c
959	544	92	13.5128	4.5172	4.87434	20.0553	139.986	413.872	43.0899	0.91657	1.52192	0.0543795	1.3495	0.752757	3.7291	0.651593	33.2822	1047.51	1.06502	1.41132	1.3495	0.493252	0.239813	0.565025	0.035662	3.2227	0.41786	3.76798	0.49862	33.03	1031.6	1.03383	1.545	3.2227	0.641287	0.0779042	0.343097	1.49e-06	3	667	c
960	570	92	13.6932	4.05753	7.05027	20.0214	172.462	450.71	42.267	0.899977	1.33321	0.0394365	1.57311	0.821286	5.40118	0.631484	30.9196	899.709	1.19289	1.5626	1.57311	0.51747	0.297641	0.648826	0.0266817	4.52663	0.519081	5.70622	0.463202	30.6371	882.421	1.17316	1.71721	4.52663	0.698707	0.139083	0.475803	1.75e-06	6	678	c
961	554	97	14.2401	5.29861	6.02582	23.4196	73.8114	449.23	47.1738	0.937533	1.40768	0.0507397	1.34634	0.782023	4.08827	0.65439	32.5571	1000.7	1.09766	1.44885	1.34634	0.496933	0.252308	0.584683	0.0335672	3.59787	0.42058	4.10472	0.487572	32.0489	968.927	1.06336	1.60651	3.59787	0.656129	0.0673576	0.325483	1.32e-06	5	811	c
962	467	81	12.0512	2.81403	7.07619	17.5016	141.047	508.437	33.5255	0.824391	0.839069	0.0869496	0.825406	0.818451	3.27324	0.731913	33.7523	1078.44	1.03876	1.28643	0.825406	0.4169	0.337328	0.6377	0.0533656	2.4	0.520786	3.5041	0.57602	33.44	1057.82	1.03311	1.47526	2.4	0.589098	0.146287	0.455764	1.93e-06	7	2055	c
963	728	116	15.9005	4.59819	6.52222	25.4702	148.923	537.599	46.7061	0.843384	0.920309	0.0509947	1.10693	0.874736	5.4184	0.691024	32.4484	995.699	1.15729	1.45559	1.10693	0.46007	0.353487	0.681715	0.0368313	2.71586	0.685216	5.31384	0.552842	32.1601	976.351	1.14704	1.6103	2.71586	0.615313	0.171789	0.511003	2.03e-06	6	2055	c
964	516	88	12.7485	3.35777	6.27278	19.8026	177.593	545.843	36.1903	0.792495	1.54175	0.0582681	0.984318	0.850819	4.29907	0.71383	33.575	1067.4	1.0913	1.36152	0.984318	0.433685	0.339935	0.653773	0.0385857	2.13721	0.649898	4.05227	0.554529	33.1372	1038.54	1.06747	1.51928	2.13721	0.565181	0.155141	0.474857	2.08e-06	6	854	c
965	728	116	15.9005	4.59819	6.52222	25.4702	148.923	537.599	46.7061	0.843384	0.920309	0.0509947	1.10693	0.874736	5.4184	0.691024	32.4484	995.699	1.15729	1.45559	1.10693	0.46007	0.353487	0.681715	0.0368313	2.71586	0.685216	5.31384	0.552842	32.1601	976.351	1.14704	1.6103	2.71586	0.615313	0.171789	0.511003	2.03e-06	6	2055	c
966	419	73	11.2049	2.34025	6.33329	15.6315	94.8519	529.82	31.1491	0.791828	1.2214	0.0373948	1.33011	0.873741	6.26739	0.642578	32.0986	974.714	1.19598	1.53206	1.33011	0.483418	0.333065	0.676653	0.0274529	3.60234	0.638104	5.97704	0.475966	31.3801	929.565	1.15994	1.66325	3.60234	0.645141	0.153303	0.491223	1.74e-06	5	533	c
967	740	91	14.9269	2.11387	8.80528	19.2198	164.183	694.065	36.6038	0.634154	0.0108801	0.0470085	1.26795	0.882716	6.40548	0.678471	33.5566	1067.48	1.1973	1.51257	1.26795	0.482018	0.356893	0.694001	0.0322455	2.93056	0.70048	5.89209	0.522933	33.1744	1041.25	1.1648	1.64651	2.93056	0.621482	0.168192	0.510808	1.67e-06	5	762	c
968	424	69	11.9042	3.34285	5.98903	16.6907	137.192	668.636	35.8444	0.890759	0.913345	0.0467391	1.40153	0.801878	4.53704	0.646279	35.3098	1179.97	1.14517	1.49292	1.40153	0.493682	0.288632	0.628996	0.0345537	3.55858	0.490142	4.48978	0.487758	35.0027	1160.1	1.09557	1.62048	3.55858	0.651695	0.106838	0.408837	1.87e-06	11	462	c
969	640	89	13.9562	2.29061	9.65414	17.2203	207.443	659.302	35.6872	0.741434	1.12786	0.089357	0.496879	0.896347	3.39684	0.791011	37.9367	1371.55	1.02524	1.19724	0.496879	0.341129	0.432399	0.695268	0.0541187	1.35209	0.732968	3.53169	0.636543	37.6751	1351.24	1.03544	1.38933	1.35209	0.489032	0.217102	0.535778	1.84e-06	7	3858	c
970	481	87	12.4503	3.66552	5.84303	18.5891	239.435	726.233	38.2421	0.879435	1.267	0.0456961	0.890519	0.895424	5.25778	0.694921	36.1591	1241.52	1.15378	1.42676	0.890519	0.424167	0.377786	0.696769	0.0294146	2.77262	0.687296	5.43329	0.528113	35.868	1220.58	1.14587	1.60942	2.77262	0.618539	0.175286	0.515725	1.23e-06	4	725	c
971	453	87	12.7405	5.06023	4.11109	21.3211	261.005	687.123	45.2209	0.943879	1.2806	0.0218607	2.44826	0.856428	9.52623	0.52668	31.0969	918.733	1.31304	1.75903	2.44826	0.590154	0.297182	0.677355	0.0162669	7.30504	0.574142	9.57686	0.357793	30.3926	873.907	1.29095	1.90007	7.30504	0.790319	0.134913	0.490247	1.55e-06	4	2052	c
972	484	94	13.1801	5.40522	4.30431	22.0381	275.896	672.855	47.4196	0.954079	1.36159	0.0755222	1.01407	0.728617	2.86833	0.69043	27.4654	706.659	1.00411	1.2939	1.01407	0.450031	0.251524	0.557519	0.052621	2.35784	0.380288	2.90237	0.553152	27.1667	691.844	0.963753	1.42081	2.35784	0.583525	0.071428	0.316062	1.62e-06	3	2052	c
973	725	123	18.1727	7.85741	5.54185	31.387	322.846	720.769	65.5484	0.968977	0.964535	0.0918891	0.743379	0.784239	2.72269	0.732152	36.5845	1273.65	0.982415	1.21668	0.743379	0.400566	0.307103	0.597396	0.0689023	1.85667	0.460707	2.72139	0.588154	36.2883	1253.38	0.956234	1.34928	1.85667	0.543961	0.094323	0.353598	1.47e-06	5	2798	c
974	174	51	7.04966	1.54469	3.70671	10.0866	459.606	664.842	18.6567	0.694598	0.354205	0.082421	0.74461	0.704533	2.26005	0.701327	32.6551	1012.13	0.908692	1.152	0.74461	0.381922	0.228961	0.507541	0.0618953	2.06977	0.259171	2.39693	0.522161	32.4419	1000	0.874703	1.30152	2.06977	0.542754	0.0484757	0.250226	2.16e-06	10	3921	c
975	772	96	15.5557	2.71505	11.1245	21.5639	674.187	401.163	39.5552	0.748909	1.16718	0.157379	0.43675	0.724094	1.79148	0.807542	30.6719	895.523	0.792267	0.938977	0.43675	0.322428	0.289832	0.522103	0.115269	0.969298	0.4048	1.81426	0.683772	30.595	891.456	0.7761	1.05287	0.969298	0.437815	0.0732333	0.277339	2.02e-06	2	5843	c
976	711	105	15.5032	3.938	8.31227	23.8455	628.649	342.738	41.5571	0.78192	1.03073	0.0500003	1.46484	0.89669	8.08955	0.657846	29.9756	852.894	1.23532	1.56346	1.46484	0.510681	0.368641	0.711814	0.0375024	3.61688	0.732175	7.75234	0.519069	29.6006	829.539	1.20793	1.7039	3.61688	0.660782	0.199737	0.5611	1.72e-06	7	5843	c
977	702	111	16.0604	5.24702	7.23546	25.8347	668.57	316.881	48.6475	0.899727	0.563511	0.0520788	0.93415	0.856318	4.25075	0.697289	34.9931	1158.39	1.13579	1.40999	0.93415	0.434828	0.357227	0.677049	0.0368956	2.29264	0.627449	4.07695	0.545151	34.6037	1132.08	1.10642	1.55213	2.29264	0.576601	0.160056	0.486467	1.79e-06	8	2824	c
978	642	95	13.8415	1.73237	10.3751	17.3482	679.469	177.779	33.2187	0.614179	1.25742	0.0722304	0.619127	0.906947	4.32674	0.787059	33.6669	1073.12	1.1026	1.301	0.619127	0.372496	0.45884	0.734267	0.0512606	1.55009	0.753913	4.14948	0.661322	33.4991	1060.68	1.10106	1.44171	1.55009	0.511042	0.265108	0.596959	1.58e-06	10	10263	c
979	622	99	14.6501	4.92267	5.13549	23.9532	255.396	504.638	45.462	0.893117	1.03162	0.105389	0.590674	0.751423	2.18811	0.76626	32.2435	986.33	0.903959	1.10552	0.590674	0.363994	0.285173	0.55468	0.0689065	1.31694	0.497491	2.31036	0.637512	32.2714	988.338	0.896036	1.24615	1.31694	0.484048	0.103476	0.35657	1.74e-06	7	909	c
980	783	111	16.4556	5.46522	5.89192	26.8322	238.393	367.212	50.5821	0.898581	0.824924	0.0729539	0.824532	0.833338	3.47367	0.735813	34.6487	1136.99	1.06427	1.31648	0.824532	0.417718	0.355721	0.658979	0.0495978	2.11111	0.58428	3.5391	0.596785	34.5726	1131.73	1.05123	1.46785	2.11111	0.570957	0.157078	0.470498	1.37e-06	3	1025	c
981	643	91	15.0415	4.6295	8.07611	23.0835	376.719	293.287	45.7926	0.912034	0.960618	0.104335	0.523829	0.832797	2.56644	0.78958	32.2605	986.678	0.94056	1.11491	0.523829	0.344658	0.368359	0.628912	0.0775002	1.08257	0.646379	2.53069	0.668398	32.1872	982.332	0.925494	1.23513	1.08257	0.444014	0.188813	0.476481	1.43e-06	4	5153	c
982	365	58	10.4866	1.4383	8.12274	13.6929	274.985	157.606	25.7469	0.648313	-1.32852	0.0410566	1.16938	0.871525	5.551	0.681398	34.409	1121.11	1.18137	1.49258	1.16938	0.473051	0.348246	0.683429	0.0289686	2.77778	0.691285	5.49893	0.527906	33.9346	1088.88	1.1679	1.62721	2.77778	0.609898	0.190833	0.539037	1.96e-06	5	467	c
983	574	79	13.1262	1.67479	9.87385	16.028	249.502	172.036	32.4921	0.681438	1.29955	0.0457891	1.63872	0.834035	5.93693	0.629993	31.9537	964.067	1.19726	1.56848	1.63872	0.525104	0.295326	0.647507	0.0295399	4.68297	0.546512	6.16329	0.463632	31.6928	946.829	1.18279	1.72512	4.68297	0.699898	0.132976	0.46677	1.97e-06	5	647	c
984	631	90	13.9722	2.33809	8.66531	18.4228	210.812	218.326	34.9379	0.712116	1.49351	0.0529024	0.956835	0.832768	3.8608	0.693302	35.0533	1163.03	1.10414	1.40181	0.956835	0.438053	0.313609	0.637414	0.0361936	2.43925	0.559997	3.77186	0.543102	34.6673	1138.3	1.05703	1.51008	2.43925	0.593053	0.116414	0.412642	1.8e-06	7	3550	c
985	722	126	15.805	5.32831	6.33351	27.0039	190.086	239.11	49.9736	0.907531	1.55306	0.0612117	1.18144	0.770059	3.56901	0.690956	32.9562	1025.53	1.07465	1.38358	1.18144	0.473796	0.273721	0.595959	0.0448885	2.92718	0.420234	3.52445	0.55556	32.7168	1011.52	1.02543	1.5057	2.92718	0.605006	0.100011	0.382869	1.67e-06	6	3550	c
986	659	116	14.2671	4.08879	5.41536	22.67	208.946	257.184	41.3602	0.822993	-1.52243	0.0715726	1.23984	0.790414	3.95782	0.67649	33.3203	1049.04	1.09529	1.39883	1.23984	0.479129	0.300615	0.624792	0.0543367	2.72321	0.521004	3.84263	0.527659	33.0304	1030.58	1.06268	1.51515	2.72321	0.61498	0.10996	0.402035	1.6e-06	5	3550	c
987	604	83	13.5905	2.35704	8.96425	18.114	255.973	281.101	35.4752	0.729785	-0.36399	0.0374256	1.13377	0.882885	5.84043	0.660879	32.4274	992.153	1.2196	1.53549	1.13377	0.462849	0.363592	0.703254	0.0254862	3.01727	0.668214	5.54702	0.504786	32	965.322	1.17547	1.69308	3.01727	0.627237	0.177407	0.529895	1.48e-06	5	1033	c
988	712	89	14.6998	1.51034	11.5552	17.756	280.931	309.501	33.5601	0.505526	1.25706	0.0397745	1.05	0.878092	5.30654	0.664693	34.547	1129.66	1.17818	1.48582	1.05	0.447865	0.348893	0.682866	0.024304	3.18898	0.64726	5.52029	0.48736	34.3732	1117.27	1.17114	1.69026	3.18898	0.636319	0.140047	0.474053	1.36e-06	4	2971	c
989	601	93	13.8836	3.40997	8.79668	21.1163	396.092	88.3171	39.1167	0.815775	1.35904	0.0411918	1.53583	0.851206	6.1609	0.657277	30.7606	891.615	1.22233	1.55313	1.53583	0.516122	0.350746	0.695315	0.0275227	3.98276	0.591019	5.86913	0.50329	30.4272	871.269	1.17357	1.69796	3.98276	0.677808	0.156707	0.500765	3.53e-06	8	1166	c
990	491	76	12.2871	1.86703	9.31338	16.287	397.091	115.489	30.5038	0.70432	-0.78093	0.077196	0.973268	0.838642	4.01586	0.705029	33.4534	1059.31	1.07714	1.3382	0.973268	0.446311	0.34097	0.65045	0.0569961	2.35971	0.560446	3.68421	0.572002	33.1942	1042.59	1.03504	1.44247	2.35971	0.581924	0.131925	0.429329	3.75e-06	9	1166	c
991	464	88	12.483	3.78082	6.27624	19.8936	424.62	69.8323	37.0537	0.80927	-1.45426	0.0339379	1.47359	0.862252	6.34887	0.626272	34.6954	1140.45	1.2212	1.5844	1.47359	0.505706	0.325006	0.677703	0.0246646	3.77261	0.660477	6.55575	0.489407	34.3928	1119.99	1.20337	1.7299	3.77261	0.664149	0.167954	0.521344	2.9e-06	5	456	c
992	689	98	14.4333	2.05339	9.92127	18.6269	451.426	104.648	33.8816	0.578454	-1.16912	0.0694754	0.755307	0.894438	4.57757	0.750637	36.4103	1259.76	1.10858	1.34491	0.755307	0.405434	0.40697	0.704983	0.0477122	1.69206	0.75444	4.4453	0.61719	36.3144	1252.27	1.09819	1.48723	1.69206	0.530955	0.226977	0.562737	3.2e-06	8	2346	c
993	664	112	15.6384	4.9069	6.66395	25.588	481.493	113.151	45.3116	0.868613	-0.180155	0.0745076	0.712662	0.813429	2.9099	0.726948	38.5032	1413.01	1.00548	1.23808	0.712662	0.388171	0.31557	0.609239	0.0617043	1.75868	0.522943	2.84326	0.599704	38.4392	1409.71	0.968022	1.32939	1.75868	0.534681	0.119694	0.39459	2.89e-06	7	2346	c
994	483	75	12.1093	2.12977	8.152	15.9805	154.342	154.212	32.0426	0.745347	1.04541	0.0355549	1.12889	0.905511	6.97362	0.667595	33.88	1088.05	1.24137	1.55636	1.12889	0.464075	0.389667	0.727427	0.022565	3.40141	0.717368	7.01737	0.495832	33.6362	1071.25	1.22344	1.73533	3.40141	0.649683	0.208253	0.57615	2.82e-06	3	527	c
995	460	82	12.2328	3.73809	5.8254	18.8708	189.842	157.353	37.6612	0.884124	1.04619	0.148698	0.36369	0.792043	1.87444	0.826671	33.5547	1075.46	0.808255	0.927051	0.36369	0.294081	0.36239	0.580127	0.11628	0.668407	0.595785	1.8268	0.722193	33.4465	1068.22	0.803274	1.02237	0.668407	0.369201	0.182955	0.431358	3.23e-06	4	1704	c
996	468	79	11.9617	2.64847	6.26266	16.4769	151.175	204.225	33.1037	0.817606	1.48954	0.101187	0.437644	0.83844	2.35443	0.792956	38.3995	1409.55	0.921964	1.06389	0.437644	0.31377	0.388423	0.633408	0.0710494	1.10591	0.580201	2.31719	0.64803	38.2931	1402.25	0.90207	1.21423	1.10591	0.45169	0.138705	0.406866	3.07e-06	5	826	c
997	684	86	14.4275	1.897	11.2603	18.0633	184.582	198.349	35.7868	0.69087	-1.45153	0.0552619	0.71075	0.903068	4.66621	0.73836	35.4648	1192.76	1.13105	1.35902	0.71075	0.393098	0.421641	0.718473	0.0356682	1.85808	0.746275	4.66159	0.589997	35.2382	1176.22	1.12899	1.53266	1.85808	0.546369	0.224554	0.566903	3.35e-06	7	1704	c
998	608	83	13.7971	2.64772	9.21192	18.2206	223.41	198.918	36.7827	0.798119	1.10735	0.0835602	0.629759	0.851005	3.11336	0.755492	36.6726	1280.41	0.999336	1.19986	0.629759	0.375033	0.362368	0.641858	0.0616727	1.56983	0.62659	3.10202	0.615407	36.486	1267.36	0.982207	1.3322	1.56983	0.512851	0.149673	0.440319	3.59e-06	5	621	c
999	437	84	11.5644	3.04284	5.95163	16.6166	197.41	237.639	33.7716	0.835609	-1.34249	0.0802354	0.778678	0.813919	3.09231	0.731858	37.533	1342.18	1.00098	1.24875	0.778678	0.40941	0.316294	0.611946	0.0627769	1.86133	0.562071	3.12516	0.600142	37.4933	1339.35	0.986966	1.36433	1.86133	0.547783	0.136654	0.425867	3.67e-06	9	3294	c
1000	484	73	12.2284	2.06735	8.94427	15.8909	218.255	236.728	31.5625	0.766571	-1.14597	0.0633494	0.698615	0.856801	3.43932	0.728476	37.3468	1326.28	1.05332	1.28225	0.698615	0.382071	0.355261	0.652159	0.0432539	1.79075	0.625652	3.39183	0.564127	37.2555	1320.14	1.02888	1.442	1.79075	0.527013	0.152185	0.459807	3.82e-06	7	3294	c
1001	503	80	12.2019	2.46459	5.65368	16.8171	230.517	254.765	31.5798	0.712566	-1.3522	0.0843095	0.508565	0.862431	2.84841	0.772698	37.3041	1324.67	1.00269	1.1697	0.508565	0.336369	0.401658	0.666707	0.0578506	1.19124	0.675212	2.83388	0.628341	37.182	1315.99	0.990198	1.32151	1.19124	0.45951	0.184041	0.484754	3.96e-06	9	3294	c
1002	386	72	11.1091	2.75947	6.22724	16.3995	289.589	249.23	31.0097	0.82993	-1.40081	0.0718307	0.770642	0.835306	3.33962	0.750924	36.9936	1303.18	1.01318	1.25648	0.770642	0.410564	0.342472	0.636409	0.0494221	1.8567	0.602853	3.33755	0.61007	36.81	1289.89	0.999364	1.4048	1.8567	0.55313	0.148291	0.448872	4.11e-06	5	5032	c
1003	499	73	12.3793	2.36486	8.27589	17.016	322.734	258.428	33.1101	0.786057	-1.37023	0.049338	1.31066	0.828456	4.82017	0.657724	33.3385	1050.04	1.15053	1.47771	1.31066	0.494505	0.308452	0.645461	0.0327506	3.58447	0.54607	4.94827	0.504204	33.2557	1044.4	1.12803	1.62108	3.58447	0.662478	0.123681	0.438657	4.13e-06	7	522	c
1004	755	93	15.2009	2.05198	11.9866	19.1433	310.714	296.145	37.6565	0.692759	1.55167	0.0389492	1.17886	0.883141	6.04393	0.685893	31.8677	958.246	1.22052	1.54041	1.17886	0.472974	0.367929	0.707595	0.0271618	2.92804	0.694878	5.79814	0.539359	31.6117	941.661	1.19136	1.68836	2.92804	0.615996	0.187963	0.5436	4.06e-06	4	5032	c
1005	572	95	13.5816	4.9983	2.82099	21.9413	356.689	289.275	43.2634	0.909294	1.08314	0.096777	0.600943	0.780011	2.36585	0.756132	38.2434	1396.77	0.935057	1.13977	0.600943	0.365283	0.303861	0.579025	0.0712642	1.32114	0.496034	2.31074	0.624223	38.1829	1393.95	0.899782	1.25643	1.32114	0.481882	0.10772	0.365085	4.11e-06	6	3518	c
1006	747	102	15.4677	3.51448	9.40206	22.2324	341.081	320.15	42.2013	0.792101	-1.47991	0.0482884	1.021	0.866497	4.82389	0.702707	33.7714	1077.3	1.16731	1.45877	1.021	0.447565	0.354066	0.682739	0.0329329	2.58595	0.641627	4.6079	0.544018	33.8057	1079.5	1.13075	1.58705	2.58595	0.589581	0.176687	0.514567	3.76e-06	5	3518	c
1007	367	77	10.5922	2.63962	4.82616	14.9915	400.927	349.229	29.2412	0.772219	-0.0134176	0.144794	0.560811	0.707168	1.95757	0.771847	30.0083	853.539	0.84887	1.03392	0.560811	0.358151	0.269688	0.524896	0.122601	1.09966	0.385411	1.89463	0.672367	29.8488	846.724	0.792903	1.11298	1.09966	0.460791	0.0841622	0.305216	3.34e-06	8	1510	c
1008	587	93	13.6721	3.64313	4.98226	19.6741	494.193	250.501	37.4153	0.80064	-1.36365	0.0953032	0.478699	0.856175	2.66417	0.79913	37.8255	1365.48	0.95669	1.11962	0.478699	0.336254	0.397324	0.652691	0.0711666	1.00963	0.675406	2.55523	0.689131	37.711	1356.8	0.947016	1.24004	1.00963	0.444044	0.201306	0.492315	2.78e-06	7	3024	c
1009	496	88	12.3912	3.37573	5.80028	17.9445	511.165	286.868	32.0559	0.604685	-1.14007	0.140195	0.423014	0.760112	1.88169	0.801644	32.7386	1020.68	0.839148	0.97958	0.423014	0.312154	0.321643	0.559486	0.10108	0.913253	0.493806	1.90208	0.682169	32.7157	1019.78	0.823847	1.11432	0.913253	0.424154	0.104338	0.339765	2.2e-06	4	3024	c
1010	663	95	14.2174	3.0414	6.97999	19.8065	463.276	219.895	36.8656	0.70875	1.39829	0.0824728	0.512717	0.868318	2.94681	0.774647	37.4889	1338.83	0.998464	1.16988	0.512717	0.339943	0.404513	0.668916	0.0545813	1.32423	0.677533	3.05329	0.632524	37.372	1330.28	0.993636	1.34581	1.32423	0.488732	0.1852	0.490087	3.19e-06	4	2193	c
1011	378	77	11.5645	3.56271	6.09002	18.6143	77.5556	262.146	36.1266	0.913069	0.712625	0.062658	0.804807	0.883354	4.44979	0.734197	38.716	1429.5	1.0795	1.31314	0.804807	0.40835	0.377657	0.676304	0.0472202	1.70779	0.770214	4.71605	0.598616	38.4481	1409.07	1.08617	1.41472	1.70779	0.526508	0.249408	0.575988	2.57e-06	4	856	c
1012	691	93	14.7353	3.50906	9.11686	21.2671	126.356	287.651	40.9184	0.832581	1.09806	0.1051	0.481895	0.809106	2.26221	0.79141	32.629	1010.89	0.90646	1.07119	0.481895	0.33538	0.349696	0.604066	0.0712151	1.12231	0.584175	2.3495	0.664259	32.5273	1004.11	0.907094	1.22389	1.12231	0.458989	0.146993	0.420101	3.07e-06	3	2090	c
1013	761	95	15.5829	3.34598	9.52054	21.2573	104.051	306.113	42.5778	0.814272	1.12222	0.0752411	0.953027	0.812569	3.54233	0.703887	36.5313	1266.92	1.0672	1.34856	0.953027	0.439051	0.304028	0.619174	0.0527716	2.54423	0.472911	3.41347	0.543846	36.2414	1247.37	1.02407	1.48965	2.54423	0.587738	0.103709	0.387759	2.94e-06	3	2090	c
1014	382	71	10.8301	2.79166	5.39291	15.6884	80.4087	319.603	31.1907	0.846734	0.751226	0.0830905	0.655738	0.801337	2.65038	0.734569	38.7983	1436.43	0.976506	1.19981	0.655738	0.373321	0.312462	0.598945	0.0625482	1.4586	0.527956	2.54498	0.602286	38.5032	1416.37	0.931243	1.31841	1.4586	0.493666	0.120165	0.393845	2.7e-06	4	456	c
1015	418	71	10.8608	2.2511	5.02146	15.3353	48.2785	362.454	28.1211	0.696487	1.55005	0.135056	0.407792	0.763783	1.86317	0.808571	33.2584	1055.24	0.820844	0.955122	0.407792	0.308321	0.326763	0.558003	0.0927943	0.926346	0.473145	1.87913	0.669405	33.102	1045.78	0.803522	1.08615	0.926346	0.418471	0.0985533	0.326321	2.4e-06	3	998	c
1016	769	93	15.3991	2.53064	10.5938	20.817	78.3074	393.951	39.4925	0.741743	-1.02883	0.0394394	1.04948	0.867509	4.96058	0.666913	35.7945	1213.15	1.17715	1.49754	1.04948	0.448295	0.334285	0.672142	0.0263166	2.87537	0.623113	4.81463	0.493122	35.5579	1196.78	1.14274	1.66987	2.87537	0.608702	0.132008	0.458508	3.22e-06	9	832	c
1017	672	99	14.6872	4.04894	7.36446	22.9376	186.185	425.022	42.5912	0.860311	-1.50545	0.0424861	1.06825	0.906249	6.6973	0.68733	33.9643	1093.61	1.2246	1.51775	1.06825	0.45705	0.390656	0.722066	0.0296107	2.77534	0.746569	6.47554	0.534788	33.799	1081.51	1.20482	1.67061	2.77534	0.615276	0.212341	0.572347	3.96e-06	7	2503	c
1018	453	87	12.5192	4.82338	4.87362	21.1237	256.468	455.014	43.8315	0.944471	-1.55486	0.112129	0.506024	0.810249	2.33339	0.778072	32.3277	991.585	0.91501	1.0881	0.506024	0.339014	0.34327	0.60245	0.0795243	1.1087	0.62155	2.46478	0.651087	32.1793	982.653	0.907921	1.2362	1.1087	0.454076	0.166008	0.447795	3.96e-06	7	6685	c
1019	749	95	15.5411	3.08658	8.78458	21.0368	257.012	525.459	42.2489	0.796182	1.12865	0.101359	0.630466	0.73366	2.18357	0.761326	30.1093	857.604	0.894591	1.1051	0.630466	0.376204	0.276548	0.546428	0.0700397	1.34317	0.452152	2.22586	0.625895	29.9829	850.684	0.877537	1.23932	1.34317	0.482048	0.0890234	0.330228	2.44e-06	1	1174	c
1020	762	122	15.8621	5.80687	4.12416	26.4112	298.075	433.401	52.9163	0.910619	-1.42149	0.133624	0.468386	0.768256	2.01057	0.805652	30.5058	883.129	0.84853	1.01138	0.468386	0.333829	0.328626	0.572842	0.100612	0.905775	0.562632	2.03548	0.70717	30.459	880.247	0.844593	1.11986	0.905775	0.428149	0.152112	0.410327	3.78e-06	6	6685	c
1021	522	83	12.7207	2.99048	7.93493	18.5261	286.454	496.735	36.2017	0.840169	-1.44611	0.062087	0.792288	0.874287	4.15118	0.743472	35.5234	1196.9	1.0983	1.34535	0.792288	0.408902	0.38554	0.688512	0.0440373	1.81858	0.703862	4.0705	0.60815	35.4115	1189.19	1.07895	1.45495	1.81858	0.535447	0.219143	0.548617	3.44e-06	8	6685	c
1022	531	90	13.4295	4.63383	6.45826	22.4761	357.44	526.824	43.8478	0.930218	1.44874	0.119774	0.506348	0.745322	1.9941	0.776079	30.5703	886.361	0.856863	1.02175	0.506348	0.337893	0.295314	0.546013	0.0958519	1.07333	0.419684	1.92478	0.644667	30.4556	881.408	0.811288	1.10685	1.07333	0.441887	0.0859575	0.307624	2.47e-06	6	937	c
1023	711	116	14.898	2.70801	9.01448	21.5419	474.562	474.668	33.7615	0.394211	-1.35759	0.0377254	1.48199	0.8476	5.86215	0.638288	31.3811	927.642	1.22028	1.58572	1.48199	0.511214	0.315756	0.669478	0.0270814	3.63361	0.617272	5.747	0.504989	31.1697	914.051	1.19148	1.70033	3.63361	0.658028	0.165513	0.514019	3.23e-06	8	10155	c
1024	673	100	14.5182	3.9704	5.09989	20.4736	476.288	506.431	41.9208	0.834751	1.49795	0.134001	0.414314	0.79332	2.00231	0.809066	30.8008	900.161	0.858088	0.99815	0.414314	0.312289	0.349952	0.587516	0.0994621	0.811545	0.579481	1.96493	0.696095	30.6927	894.174	0.840974	1.1068	0.811545	0.402427	0.154378	0.411129	2.83e-06	5	10155	c
1025	590	80	13.4099	2.47284	9.00129	17.4133	510.324	366.434	34.9102	0.754196	1.00769	0.0773077	0.949413	0.767593	3.04256	0.710213	34.4309	1123.58	1.01895	1.29622	0.949413	0.438309	0.272177	0.579027	0.0586258	2.11753	0.484288	3.05302	0.584014	34.2909	1115.38	0.984994	1.41312	2.11753	0.559389	0.102202	0.375746	1.98e-06	2	661	c
1026	540	118	13.3968	3.10362	7.29539	19.7339	19.977	238.258	34.9969	0.743579	1.55188	0.0537565	0.750256	0.877433	4.0606	0.715949	36.5308	1266.76	1.10094	1.34471	0.750256	0.395432	0.377439	0.681957	0.0389722	2.11633	0.655979	4.07588	0.559989	36.0984	1236.75	1.07608	1.49504	2.11633	0.566826	0.162543	0.482093	1.34e-06	7	10157	c
1027	579	101	14.2896	4.84262	5.31657	23.5172	20.9389	277.136	44.6385	0.905387	-1.41637	0.0728377	0.577767	0.912024	4.28367	0.76156	37.7128	1355.19	1.07073	1.25755	0.577767	0.359723	0.436579	0.710332	0.0502673	1.68675	0.742499	4.27523	0.59674	37.4779	1337.96	1.0562	1.42985	1.68675	0.530865	0.211822	0.536041	1.37e-06	5	10157	c
1028	352	62	10.1622	1.62663	6.91798	12.5962	45.1153	264.663	26.6743	0.727941	1.47339	0.0503615	1.22291	0.862428	5.44461	0.645888	34.2421	1111.77	1.1481	1.44378	1.22291	0.476266	0.350432	0.677134	0.0360356	3.46102	0.599459	5.32043	0.473891	33.6712	1073.24	1.12252	1.59021	3.46102	0.642399	0.155193	0.484509	1.54e-06	9	10157	c
1029	410	65	11.0479	2.13824	7.8045	14.8998	64.4336	328.181	30.1431	0.792988	1.47706	0.0359196	2.02885	0.799415	6.05734	0.578693	33.44	1057.82	1.19684	1.6074	2.02885	0.563298	0.254363	0.611575	0.0231812	6.15642	0.415143	6.26319	0.418016	33.0559	1031.75	1.16776	1.76012	6.15642	0.758497	0.0796517	0.368582	1.63e-06	8	701	c
1030	314	58	9.71747	2.057	6.38653	13.8126	73.578	294.766	27.0517	0.808747	-1.42465	0.0607319	1.07719	0.836037	4.28485	0.662272	35.8491	1220.72	1.08338	1.37123	1.07719	0.453792	0.323015	0.640593	0.0411095	3.14829	0.524387	4.30972	0.497418	35.4144	1190.11	1.06309	1.53111	3.14829	0.633011	0.101774	0.389116	1.63e-06	5	10157	c
1031	441	76	12.085	3.43506	6.25732	18.147	95.1217	286.114	35.7593	0.873228	1.28562	0.064264	1.04966	0.810929	3.77584	0.67897	35.7045	1210.51	1.05688	1.35366	1.04966	0.45398	0.291538	0.608251	0.0441827	2.88095	0.498055	3.86979	0.520334	35.5317	1199.02	1.02926	1.5167	2.88095	0.625247	0.097058	0.378604	1.68e-06	4	10157	c
1032	261	52	8.71846	1.80481	6.02402	11.5999	106.432	216.508	24.3496	0.810612	1.56139	0.102935	0.733193	0.758456	2.51772	0.731723	29.9055	843.868	0.948074	1.17277	0.733193	0.398225	0.302625	0.584602	0.0807487	1.47248	0.45504	2.351	0.62156	29.7661	837.516	0.894194	1.2351	1.47248	0.508099	0.110597	0.366915	1.78e-06	9	10157	c
1033	640	109	14.359	3.55028	4.9524	22.7105	146.779	201.411	36.8058	0.648631	-0.661011	0.0704802	0.775665	0.873463	4.06497	0.72725	35.433	1191.2	1.08599	1.33009	0.775665	0.407913	0.370467	0.67365	0.0494424	2.2018	0.637667	4.03837	0.579534	35.2468	1177.67	1.07489	1.50926	2.2018	0.582572	0.156482	0.475424	1.87e-06	9	9590	c
1034	698	99	14.8052	3.28214	9.06061	20.5828	197.397	164.946	39.8816	0.794137	-1.07959	0.0751655	0.638793	0.838262	2.97477	0.746124	37.4971	1338.19	1.01521	1.22577	0.638793	0.373425	0.353066	0.639355	0.0492147	1.60778	0.606552	3.04319	0.590695	37.423	1332.75	1.00625	1.3989	1.60778	0.516554	0.148558	0.448418	1.99e-06	9	9590	c
1035	587	94	14.1762	4.06313	6.9919	22.3681	262.693	159.855	41.4569	0.877067	-0.985176	0.122422	0.396053	0.825025	2.13174	0.810785	35.5994	1209.25	0.884504	1.01256	0.396053	0.302788	0.386102	0.619665	0.0829907	0.87234	0.631022	2.1821	0.679884	35.5841	1207.13	0.895845	1.16954	0.87234	0.409863	0.180809	0.455451	2.02e-06	7	9590	c
1036	470	79	12.4178	3.05912	7.96885	19.5049	318.082	128.833	34.0935	0.822277	-0.93463	0.11427	0.560161	0.755135	2.14382	0.755843	34.8307	1157.02	0.874798	1.06245	0.560161	0.348571	0.280911	0.54162	0.0823437	1.3625	0.451141	2.24121	0.615044	34.7875	1155.11	0.853588	1.19816	1.3625	0.48417	0.0919189	0.33019	2.04e-06	9	2686	c
1037	647	107	15.1757	4.91716	7.61491	23.9514	329.771	157.415	48.7862	0.921782	-1.36715	0.0360143	1.14963	0.931117	9.34478	0.666584	37.0399	1311.59	1.27175	1.57697	1.14963	0.468796	0.421305	0.754333	0.0239691	3.65658	0.777548	9.21881	0.489003	36.7135	1285.18	1.27401	1.76309	3.65658	0.667505	0.221566	0.596254	1.96e-06	8	2686	c
1038	538	97	12.4806	3.03024	4.90437	18.8759	375.992	134.124	32.2824	0.622854	-0.90853	0.127807	0.407688	0.80696	2.05597	0.813151	35.4466	1199.86	0.86279	0.999832	0.407688	0.311069	0.373119	0.606499	0.0856504	0.929487	0.602876	2.17027	0.694231	35.4167	1197.47	0.866455	1.15298	0.929487	0.433418	0.168057	0.436651	2.02e-06	9	2925	c
1039	442	68	11.4533	1.9912	8.31571	15.394	422.396	134.777	30.1957	0.771042	-1.52261	0.144137	0.470588	0.72684	1.86138	0.790176	33.1765	1048.96	0.834751	0.994536	0.470588	0.329657	0.290959	0.535963	0.103592	1.08136	0.406713	1.91133	0.666821	33.0184	1039.55	0.816115	1.14053	1.08136	0.451455	0.0803105	0.30169	2.02e-06	9	2925	c
1040	568	79	13.0454	1.59702	9.10352	16.0356	439.302	168.172	30.5361	0.47691	0.314692	0.0289917	1.33193	0.922304	9.57138	0.628418	36.007	1237.57	1.29942	1.63929	1.33193	0.488112	0.389014	0.739544	0.0191939	4.28226	0.736375	9.12187	0.453922	35.4798	1197.66	1.28257	1.82803	4.28226	0.690451	0.189548	0.563945	1.82e-06	7	561	c
1041	498	86	12.8361	4.48891	5.99839	20.5738	473.335	151.87	42.2585	0.927594	1.52513	0.0938731	0.598263	0.776049	2.3357	0.766667	34.0597	1102.93	0.920855	1.12164	0.598263	0.367531	0.305511	0.576767	0.0673919	1.22014	0.552786	2.36416	0.644676	34.007	1099.74	0.90859	1.24269	1.22014	0.46807	0.129896	0.398188	1.97e-06	8	1457	c
1042	457	86	12.4957	4.74426	5.30482	21.0111	536.573	160.23	42.9552	0.941865	-1.39399	0.087013	0.741667	0.704176	2.25356	0.714167	35.2929	1185.5	0.92384	1.17219	0.741667	0.389963	0.228442	0.510774	0.0715603	1.49077	0.38818	2.2183	0.589492	35.2058	1181.93	0.875772	1.26033	1.49077	0.493569	0.0640287	0.282818	1.93e-06	5	1039	c
1043	564	96	13.7062	4.57635	6.70278	21.6706	581.952	179.232	44.2225	0.913695	-1.363	0.0520646	0.807026	0.873632	4.19317	0.709095	38.5953	1417.13	1.10974	1.36483	0.807026	0.407403	0.363991	0.674676	0.032826	2.26598	0.653718	4.27187	0.545161	38.3814	1400.64	1.10117	1.55035	2.26598	0.575832	0.155162	0.479119	1.77e-06	7	5912	c
1044	721	101	15.2711	3.99762	8.58797	21.9667	628.18	180.924	45.3262	0.879452	1.48301	0.0672022	0.614223	0.895288	3.93291	0.758769	37.9385	1368.9	1.09033	1.29541	0.614223	0.371639	0.425721	0.709732	0.0423787	1.68364	0.723797	4.04783	0.61541	37.7454	1353.52	1.09829	1.48117	1.68364	0.526673	0.225746	0.560378	1.75e-06	5	5912	c
1045	620	103	14.0442	3.52026	9.09813	21.2187	698.696	206.957	40.5999	0.848139	-1.5637	0.0563398	0.711372	0.876061	3.86985	0.717752	38.4154	1403.46	1.09656	1.32693	0.711372	0.383023	0.383702	0.683678	0.0383982	1.78229	0.678342	3.77047	0.558303	38.3026	1395.1	1.07631	1.47531	1.78229	0.52245	0.181643	0.505253	1.74e-06	6	1654	c
1046	565	85	13.3914	3.37211	9.07056	20.101	835.21	226.102	39.7857	0.868543	-1.51388	0.0447954	1.33444	0.87565	6.36566	0.639977	34.4404	1124.19	1.21298	1.52286	1.33444	0.491622	0.365957	0.703173	0.0341275	3.52342	0.660407	6.18771	0.482188	34.1222	1101.86	1.18847	1.65454	3.52342	0.650532	0.190757	0.542706	1.91e-06	7	601	c
1047	607	93	13.9144	3.08086	8.10111	18.8381	838.386	189.191	37.6053	0.815238	0.895135	0.0691012	0.602746	0.885189	3.62494	0.749114	39.5868	1492.4	1.08348	1.28806	0.602746	0.361123	0.408574	0.695601	0.0473536	1.4425	0.69686	3.37926	0.60954	39.5049	1487.25	1.0448	1.41731	1.4425	0.491484	0.207207	0.528547	1.76e-06	9	4767	c
1048	536	88	13.7814	4.49604	6.87263	21.7816	885.854	106.534	43.3069	0.919522	1.13822	0.0387513	1.35984	0.802642	4.44511	0.635472	34.6633	1135.88	1.14525	1.50601	1.35984	0.491872	0.269961	0.612373	0.0301267	2.99336	0.542743	4.27317	0.470916	34.5155	1126.91	1.0967	1.60413	2.99336	0.611045	0.106731	0.406754	1.7e-06	8	4767	c
1049	285	58	9.42875	2.74245	4.76427	14.341	954.946	84.0732	28.6147	0.889772	1.16999	0.215348	0.384318	0.547866	1.425	0.815973	34.2197	1128.55	0.645421	0.769845	0.384318	0.299397	0.180432	0.376291	0.217546	0.544681	0.243879	1.36018	0.748085	34.2723	1135.59	0.58718	0.766343	0.544681	0.33315	0.0413459	0.178427	1.4e-06	7	1396	c
1050	600	102	15.2248	6.23683	5.72607	25.4023	978.843	71.4133	55.193	0.960875	1.163	0.0444282	1.73909	0.848149	6.72631	0.626089	31.9109	965.182	1.18608	1.54351	1.73909	0.540955	0.311954	0.659356	0.0319448	4.5407	0.606241	6.76583	0.471599	31.7616	954.543	1.16717	1.67463	4.5407	0.709452	0.135865	0.465398	1.24e-06	7	2364	c
1051	503	97	13.3078	5.23478	4.71624	22.699	1021.63	66.011	46.7553	0.949761	1.22452	0.0663525	1.09973	0.795842	3.69333	0.683325	35.0108	1161.92	1.06607	1.36742	1.09973	0.46463	0.289982	0.609173	0.0560554	2.26807	0.567235	3.62043	0.572748	35.028	1164.02	1.03081	1.44313	2.26807	0.584683	0.135255	0.434612	9.21e-07	4	2364	c
1052	437	66	11.3523	1.15454	8.81823	13.7302	1052.13	249.629	26.7125	0.599877	1.53377	0.153503	0.438725	0.705453	1.74475	0.796078	35.2782	1191.34	0.799189	0.943893	0.438725	0.316331	0.27435	0.509191	0.152695	0.694595	0.407412	1.58607	0.727297	35.2243	1192.52	0.715344	0.946988	0.694595	0.380874	0.0865805	0.286585	8.31e-07	4	909	c
1053	692	125	16.4476	6.38154	6.00407	27.7503	1015.89	251.815	56.3309	0.949676	1.35508	0.0791157	0.650744	0.846822	3.12414	0.755912	40.2623	1550.3	0.988271	1.20203	0.650744	0.382331	0.369439	0.648058	0.055203	1.52349	0.649066	3.17062	0.632175	40.2215	1546.46	0.987603	1.35214	1.52349	0.518636	0.181982	0.486983	1.09e-06	5	821	c
1054	790	103	16.1689	3.85788	9.78974	23.8552	987.795	265.812	45.0549	0.837901	1.03917	0.0752962	0.640295	0.877153	3.60607	0.768354	38.2668	1394.15	1.0598	1.26615	0.640295	0.380821	0.416365	0.697231	0.0515816	1.56153	0.703678	3.63485	0.638373	38.1867	1387.11	1.06354	1.4258	1.56153	0.517951	0.220577	0.545676	1.35e-06	6	833	c
1055	652	87	14.1226	2.0994	10.7669	18.0308	922.15	272.98	35.8062	0.71979	1.2926	0.0645613	0.868239	0.878648	4.57737	0.713745	36.9992	1299.14	1.14252	1.38799	0.868239	0.426616	0.397658	0.705609	0.0453047	2.19828	0.684535	4.48418	0.570655	36.8776	1289.9	1.12617	1.52278	2.19828	0.578486	0.207648	0.545258	1.77e-06	6	1076	c
1056	575	81	13.2383	2.3767	7.99621	17.8741	753.708	275.395	34.4751	0.753327	-1.19275	0.0420731	1.05285	0.877568	5.29975	0.678958	35.7279	1209.33	1.18543	1.48774	1.05285	0.450046	0.355877	0.689087	0.0305756	2.53892	0.697505	5.19663	0.533049	35.5489	1196.94	1.15861	1.62004	2.53892	0.597703	0.17838	0.521416	1.76e-06	5	771	c
1057	737	97	15.2888	3.9194	8.49645	23.1702	982.377	507.671	44.6483	0.865063	1.54293	0.0617393	0.6819	0.898847	4.37065	0.74023	37.837	1361.39	1.11385	1.33039	0.6819	0.385587	0.434606	0.722687	0.0419401	1.75116	0.734248	4.29472	0.592077	37.6244	1345.4	1.10089	1.48502	1.75116	0.538129	0.244297	0.581819	1.15e-06	8	911	c
1058	643	103	14.2941	2.26491	10.1195	20.359	892.823	529.505	32.9174	0.542353	-0.258399	0.07221	0.633473	0.895083	4.01893	0.762594	37.0845	1306.07	1.10358	1.31743	0.633473	0.378746	0.419588	0.709354	0.0558466	1.44821	0.742956	3.81705	0.644842	36.8982	1292.94	1.07757	1.43928	1.44821	0.504267	0.232462	0.561397	1.12e-06	7	3329	c
1059	794	109	15.9472	4.28537	9.40928	24.7044	873.311	544.836	46.7757	0.869771	1.33513	0.084948	0.555965	0.874185	3.20946	0.777017	38.9105	1443.32	1.02864	1.21169	0.555965	0.355866	0.413266	0.684128	0.0610714	1.22631	0.706938	3.09223	0.654222	38.9066	1443.03	1.01351	1.33813	1.22631	0.475189	0.217716	0.52807	1.03e-06	6	3329	c
1060	790	105	15.9437	3.9427	9.76179	22.5409	852.178	547.624	46.1711	0.86534	1.38991	0.0699178	0.616493	0.888754	3.77084	0.753704	38.6929	1425.53	1.0756	1.27902	0.616493	0.369961	0.406702	0.692458	0.0498691	1.50935	0.722937	3.72384	0.617867	38.5597	1415.13	1.06651	1.43136	1.50935	0.509852	0.206705	0.530148	1.03e-06	5	3329	c
1061	615	89	13.9175	3.6468	8.30206	20.6532	696.092	542.366	40.8461	0.873588	-1.53791	0.080864	0.749567	0.78735	2.76244	0.725563	38.6023	1420.2	1.0004	1.24256	0.749567	0.40041	0.301418	0.597162	0.0594209	1.80734	0.469186	2.70242	0.592839	38.5853	1420.77	0.958603	1.37623	1.80734	0.541545	0.0978169	0.363291	1.34e-06	9	1955	c
1062	429	75	11.6295	3.46923	6.15245	17.7576	617.483	530.686	35.6012	0.89603	1.44237	0.124854	0.546658	0.781913	2.2533	0.783417	34.2175	1115.84	0.880239	1.06103	0.546658	0.35661	0.315111	0.572346	0.0915951	1.08523	0.580513	2.29352	0.684993	34.2045	1114.84	0.876597	1.18027	1.08523	0.460642	0.15543	0.424704	1.54e-06	6	3509	c
1063	389	73	10.7647	2.61912	5.07493	15.9082	590.701	543.041	29.1655	0.74689	1.45316	0.157651	0.371308	0.762756	1.78255	0.825316	35.045	1176.06	0.791452	0.913942	0.371308	0.297821	0.342677	0.561008	0.123881	0.705167	0.534591	1.75758	0.720365	35.0091	1174.08	0.778188	1.00848	0.705167	0.378785	0.143865	0.380424	1.53e-06	7	3509	c
1064	547	101	12.7802	2.7847	6.91047	18.8636	564.921	545.577	34.8864	0.761651	1.15897	0.0432546	0.809453	0.905622	5.28837	0.694975	37.4612	1334.03	1.16118	1.41801	0.809453	0.400885	0.403826	0.715564	0.0292398	2.24781	0.723079	5.05857	0.54366	37.0504	1303.47	1.14108	1.5948	2.24781	0.578248	0.190674	0.534296	1.52e-06	6	3509	c
1065	559	86	13.2514	3.66455	7.25734	19.5131	484.874	525.187	39.7517	0.885738	1.5197	0.101702	0.821446	0.732237	2.5339	0.722547	36.36	1260.94	0.925184	1.17082	0.821446	0.418378	0.248739	0.53192	0.0763635	1.8832	0.36858	2.49124	0.578845	36.2357	1254.3	0.877256	1.28067	1.8832	0.546172	0.0545065	0.263147	1.68e-06	8	2038	c
1066	611	85	13.6938	2.15011	8.47688	18.6859	430.541	420.859	33.0536	0.590285	-1.28223	0.0536557	0.996075	0.915148	6.86947	0.686699	34.7545	1149.57	1.1824	1.44819	0.996075	0.446727	0.411337	0.726362	0.0374758	2.95514	0.729633	6.46506	0.523118	34.3533	1120	1.17057	1.60597	2.95514	0.63029	0.204057	0.55296	1.75e-06	7	4233	c
1067	645	89	14.5114	3.48996	8.23142	20.4493	446.894	390.238	41.1499	0.861845	-0.874303	0.063964	0.639934	0.887001	3.83158	0.749979	38.5771	1415.62	1.09459	1.313	0.639934	0.376351	0.397821	0.692109	0.0440581	1.55694	0.717707	3.75766	0.601157	38.3648	1399.71	1.07893	1.46696	1.55694	0.503841	0.204792	0.533331	1.45e-06	6	4233	c
1068	698	102	15.1545	3.55715	8.55721	22.5595	469.659	397.984	39.6841	0.769596	-1.16528	0.0885398	0.440444	0.900701	3.21777	0.8	39.2853	1472.03	1.0283	1.1771	0.440444	0.320561	0.461941	0.711976	0.0621048	1.03284	0.761263	3.16314	0.674713	39.1117	1458.11	1.02636	1.33191	1.03284	0.44951	0.248804	0.561328	1.4e-06	7	4233	c
1069	416	67	11.0696	1.42621	6.67678	13.3751	30.1113	222.483	26.0079	0.567624	1.17019	0.120317	0.479301	0.78252	2.10195	0.790621	40.6371	1584.88	0.875958	1.03628	0.479301	0.332378	0.331231	0.580746	0.0885851	1.05949	0.521	2.10594	0.660623	40.3626	1563.78	0.860511	1.17018	1.05949	0.44906	0.118588	0.370339	4.84e-07	4	2716	c
1070	606	86	13.7533	3.74884	6.04357	19.214	83.9505	383.667	40.3073	0.87016	0.528219	0.129908	0.453345	0.773376	2.00021	0.795511	39.7923	1518.43	0.870724	1.02454	0.453345	0.324388	0.328959	0.576144	0.0836162	1.0226	0.546969	2.12862	0.658192	39.6968	1510.11	0.881641	1.19139	1.0226	0.438201	0.130246	0.391075	5.84e-07	4	811	c
1071	387	76	11.2457	4.12293	4.9307	18.496	213.234	494.091	38.2175	0.935856	-0.0265986	0.236143	0.32981	0.685455	1.52426	0.84778	33.1825	1059.01	0.66722	0.777984	0.32981	0.28443	0.295249	0.486029	0.188501	0.621875	0.359791	1.48568	0.760312	33.1406	1056.73	0.653572	0.847493	0.621875	0.368029	0.0987792	0.290341	8.44e-07	5	8730	c
1072	707	106	16.242	5.9368	7.13019	26.5389	192.749	512.943	53.1281	0.942741	0.40618	0.0677381	0.799168	0.825405	3.28863	0.721997	36.4641	1262.3	1.053	1.30911	0.799168	0.410212	0.334328	0.639338	0.0467053	1.99355	0.582212	3.38584	0.565015	36.329	1252.83	1.04047	1.46816	1.99355	0.555363	0.145794	0.454054	8.7e-07	5	8730	c
1073	521	95	13.0216	3.92081	5.54528	19.798	334.373	587.384	39.7217	0.888401	-0.0331602	0.23903	0.239063	0.765439	1.50959	0.880469	35.5526	1220.52	0.642481	0.714446	0.239063	0.238861	0.39965	0.547823	0.185826	0.450575	0.554107	1.50525	0.791264	35.4391	1211.28	0.658172	0.804073	0.450575	0.320023	0.173243	0.376099	9.63e-07	5	16334	c
1074	621	82	13.7218	2.40454	9.68352	17.7486	493.736	650.544	36.5638	0.775331	-0.176047	0.0660032	0.711662	0.902873	4.66357	0.733362	35.2576	1178.91	1.12591	1.33102	0.711662	0.392207	0.452554	0.73547	0.0437888	1.94756	0.720492	4.4839	0.57663	35.0687	1164.95	1.11343	1.47958	1.94756	0.548858	0.242647	0.579148	6.56e-07	2	761	c
1075	645	85	14.0503	2.29743	10.0167	19.1659	729.952	307.305	35.3528	0.702729	1.43855	0.110954	0.53805	0.84641	2.75158	0.782312	37.1888	1318.33	0.969162	1.14243	0.53805	0.353423	0.397971	0.658115	0.0864798	1.11586	0.650554	2.59662	0.661885	36.9376	1300.14	0.953333	1.24617	1.11586	0.459229	0.194879	0.485706	1.4e-06	3	818	c
1076	490	74	12.494	2.4126	7.85935	16.446	1171.92	232.337	33.4362	0.800717	0.574542	0.150906	0.429519	0.713877	1.75059	0.806468	33.503	1073.28	0.781426	0.927859	0.429519	0.318347	0.284288	0.514497	0.124204	0.855746	0.419915	1.7376	0.710024	33.3643	1065.93	0.74789	1.00945	0.855746	0.420751	0.0912033	0.303245	1.11e-06	9	7228	c
1077	722	87	14.7853	1.89875	10.6186	17.6223	915.496	289.22	34.8863	0.630162	-0.999368	0.114428	0.503297	0.829627	2.47704	0.798462	37.9011	1370.91	0.948386	1.1198	0.503297	0.342879	0.383911	0.64233	0.0795334	1.12753	0.613304	2.4579	0.666985	37.8865	1370.16	0.93435	1.25126	1.12753	0.446613	0.190446	0.481194	1.72e-06	8	41442	c
1078	777	117	15.2329	2.58312	9.39295	20.1799	1076.87	519.892	37.9655	0.62697	0.946528	0.0627318	0.640469	0.907784	4.47267	0.751741	35.6057	1201.84	1.12978	1.34113	0.640469	0.376415	0.436363	0.725908	0.0428697	1.60767	0.756064	4.29526	0.59663	35.3864	1186.64	1.10715	1.47919	1.60767	0.513677	0.237604	0.573502	1.74e-06	9	20420	c
1079	642	105	14.4599	4.28305	6.94574	22.8989	1157.01	67.6496	39.0747	0.751753	-0.454137	0.18616	0.319614	0.77384	1.70661	0.844729	35.4276	1204.24	0.761509	0.863843	0.319614	0.277126	0.365055	0.565746	0.135418	0.688889	0.530696	1.73395	0.742222	35.3296	1196.84	0.766762	0.997027	0.688889	0.389196	0.139089	0.37211	8.8e-07	5	7076	c
1080	371	62	10.5356	1.45262	8.21899	13.1776	631.96	665.424	27.5319	0.721162	-1.0392	0.0286755	1.75436	0.88463	8.60318	0.571999	30.0073	854.143	1.27602	1.65211	1.75436	0.52865	0.348045	0.708168	0.0218233	5.09779	0.648779	8.25723	0.401066	29.5584	825.818	1.24076	1.77832	5.09779	0.719964	0.175277	0.537954	5.12e-07	2	805	c
1081	479	70	12.0034	1.53209	9.52669	14.5017	669.388	644.647	30.6279	0.701538	-0.571393	0.0488788	1.68767	0.854553	6.80167	0.639645	28.7094	777.482	1.21465	1.52993	1.68767	0.535542	0.371761	0.709037	0.0347598	4.36867	0.61982	6.74554	0.495574	28.3687	757.096	1.19365	1.66289	4.36867	0.691844	0.194714	0.549021	6.44e-07	4	575	c
1082	361	59	10.321	1.02362	8.12545	12.373	934.192	576.811	24.7742	0.569489	0.626087	0.0432036	1.50523	0.865152	6.5812	0.628781	31.2436	923.1	1.20566	1.54971	1.50523	0.51466	0.341257	0.686635	0.034584	3.8328	0.644097	6.38461	0.485215	31.0418	910.127	1.16838	1.66388	3.8328	0.678881	0.172315	0.518936	1.33e-06	6	7062	c
1083	359	62	10.2273	0.935789	8.41908	12.1008	1181.13	109.617	23.5325	0.331499	0.943287	0.0342311	2.60241	0.871741	11.1451	0.551288	29.9729	859.999	1.30199	1.73062	2.60241	0.606891	0.320015	0.694837	0.0328494	7.13245	0.629402	10.6229	0.422202	29.3709	822.262	1.24787	1.76502	7.13245	0.777968	0.183883	0.548197	9.19e-07	8	400	c
1084	521	79	12.5078	1.77689	9.57943	16.1467	1046.47	134.484	31.7378	0.683252	0.537699	0.0348812	1.5308	0.898141	8.51432	0.622199	33.0657	1040.29	1.25747	1.62329	1.5308	0.514323	0.347724	0.703581	0.0278855	4.4967	0.696544	8.40915	0.465727	32.7253	1016.68	1.23656	1.75923	4.4967	0.701748	0.17193	0.530783	1.3e-06	2	647	c
1085	725	102	15.3952	3.82158	7.94481	22.8894	247.98	135.013	43.3919	0.830617	0.681537	0.0710041	0.725872	0.866317	3.71491	0.735655	36.4264	1258.74	1.09079	1.32746	0.725872	0.397121	0.372996	0.675215	0.0497811	1.7937	0.653513	3.58841	0.594377	36.1559	1239.74	1.06775	1.47123	1.7937	0.538477	0.171149	0.490616	1.97e-06	11	12177	c
1086	670	99	14.654	3.35444	9.01342	21.5099	142.866	147.161	40.3381	0.816294	1.42795	0.0374831	1.61873	0.898593	8.98134	0.654585	34.939	1163.87	1.27061	1.62868	1.61873	0.511627	0.363997	0.718015	0.0257021	4.13823	0.750921	9.30706	0.500445	34.599	1140.6	1.25967	1.75973	4.13823	0.686266	0.218795	0.592448	1.87e-06	8	12177	c
1087	685	101	14.4369	1.83215	10.6984	17.9816	113.11	164.82	34.0883	0.59258	-1.51668	0.059963	0.753409	0.892887	4.51688	0.72504	35.5801	1199.8	1.13464	1.37739	0.753409	0.398204	0.395829	0.702319	0.0405925	2.20539	0.680175	4.4478	0.553704	35.266	1177.56	1.11968	1.55631	2.20539	0.566131	0.177637	0.511566	1.81e-06	9	12177	c
1088	397	86	10.3712	3.70697	2.03432	17.1749	88.9599	170.819	32.3875	0.827544	1.14191	0.148031	0.415911	0.728944	1.76721	0.804606	33.3538	1063.17	0.788162	0.924596	0.415911	0.310205	0.298944	0.526741	0.10507	0.981651	0.368355	1.77706	0.674312	33.2385	1056.89	0.761355	1.06022	0.981651	0.436543	0.0723116	0.276515	1.71e-06	5	12177	c
1089	777	119	15.1792	3.67142	6.71724	21.6827	203.885	429.601	41.2101	0.761111	-0.608261	0.112533	0.537056	0.767773	2.15632	0.778214	39.11	1464.39	0.8961	1.0823	0.537056	0.351974	0.305998	0.568878	0.0709714	1.39797	0.442041	2.25276	0.626679	39.0796	1462.57	0.883326	1.26248	1.39797	0.498055	0.0832881	0.322357	2.09e-06	6	7896	c
1090	738	102	15.7075	4.72289	7.05989	23.3259	280.909	450.96	48.2008	0.899309	-0.674569	0.0555964	0.690253	0.90419	4.60221	0.732801	36.3798	1256.59	1.12539	1.35229	0.690253	0.383889	0.413692	0.711373	0.0369739	1.85781	0.736055	4.51931	0.576733	36.0297	1231.56	1.11058	1.52261	1.85781	0.543762	0.208564	0.54635	1.71e-06	4	7896	c
1091	759	132	16.7225	5.37549	5.89246	24.8613	98.8815	342.581	50.8987	0.89748	1.45628	0.0642139	0.814525	0.862574	3.9635	0.728159	36.2656	1248.7	1.08519	1.34518	0.814525	0.417342	0.359858	0.667705	0.0482309	2.17574	0.621727	3.87589	0.590955	35.8802	1221.77	1.06005	1.4914	2.17574	0.574629	0.156971	0.473648	1.65e-06	8	17400	c
1092	615	95	13.6901	3.75739	4.67456	19.5	71.2215	357.59	38.742	0.805143	1.51466	0.0808444	0.738334	0.819652	3.04697	0.731313	38.911	1444.66	1.00051	1.24605	0.738334	0.399534	0.314365	0.609687	0.0530033	1.83799	0.557368	3.0762	0.587277	38.7095	1430.51	0.972993	1.39886	1.83799	0.543083	0.133821	0.426353	1.77e-06	9	17400	c
1093	689	96	14.3482	2.1623	9.3149	18.7555	96.7573	377.705	35.7597	0.687875	-0.311247	0.0953033	0.457962	0.881735	2.93616	0.79659	38.995	1449.81	1.01436	1.1675	0.457962	0.325861	0.434173	0.690378	0.066395	1.09244	0.714126	2.9107	0.658784	38.7697	1432.98	1.00167	1.31536	1.09244	0.44874	0.217039	0.523472	1.99e-06	10	17400	c
1094	721	96	14.454	2.48394	7.25183	17.1994	53.7663	386.972	36.0633	0.652358	1.36884	0.06294	0.752483	0.867791	3.84581	0.723943	37.4373	1331.82	1.08919	1.33359	0.752483	0.398939	0.368712	0.672866	0.0421413	2.04814	0.635296	3.80794	0.565502	37.1879	1313.87	1.06751	1.49699	2.04814	0.558244	0.15592	0.472912	1.91e-06	9	17400	c
1095	519	74	12.4441	1.16502	10.2524	14.8489	23.3381	402.358	28.6996	0.532374	-1.50746	0.0674393	0.662558	0.87902	3.7383	0.749388	37.3662	1326.83	1.08202	1.2984	0.662558	0.381362	0.396779	0.688562	0.0460983	1.49451	0.733925	3.80843	0.613135	37.1297	1309.3	1.08031	1.4491	1.49451	0.506309	0.218802	0.5473	1.74e-06	5	17400	c
1096	599	110	14.2645	3.46561	8.80828	21.8621	58.3405	418.821	38.3009	0.756967	-1.15271	0.0516615	0.741716	0.910496	5.14346	0.722833	37.3945	1329.61	1.14835	1.3928	0.741716	0.39558	0.407757	0.714147	0.0344269	2.0502	0.739732	4.93863	0.561783	36.9779	1299.12	1.12528	1.56823	2.0502	0.559961	0.203317	0.546605	2.02e-06	11	17400	c
1097	626	98	13.5704	2.32056	7.39342	17.6857	79.3441	449.332	32.5	0.576427	0.879733	0.108804	0.451267	0.835298	2.36995	0.801675	38.7424	1435.03	0.927078	1.08091	0.451267	0.325729	0.381312	0.631711	0.0795668	1.01093	0.641846	2.41131	0.686885	38.5956	1424.31	0.917073	1.21381	1.01093	0.449731	0.186115	0.469561	1.99e-06	11	17400	c
1098	731	99	15.0508	3.49997	6.72704	21.958	167.442	488.283	40.803	0.787774	-1.56731	0.079184	0.54321	0.882427	3.31009	0.769789	38.0029	1374.61	1.0447	1.23011	0.54321	0.349268	0.416839	0.690497	0.0542571	1.38022	0.702027	3.31601	0.624757	37.7913	1359.22	1.03086	1.38542	1.38022	0.495487	0.194109	0.507516	1.61e-06	7	1918	c
1099	489	82	12.2237	2.45131	7.6317	17.073	199.405	491.404	31.9681	0.739113	0.454542	0.0597	0.840972	0.84624	3.73469	0.709153	36.9481	1295.62	1.09397	1.36145	0.840972	0.414856	0.34351	0.656844	0.0377679	2.14461	0.616839	3.79857	0.546102	36.6544	1275.14	1.07231	1.53251	2.14461	0.560323	0.154119	0.47517	1.53e-06	5	1918	c
1100	470	74	11.8821	2.15732	8.5913	16.0985	493.556	79.1407	30.7868	0.752607	-1.493	0.192393	0.331995	0.733399	1.62265	0.841571	35.4123	1204.43	0.738485	0.84769	0.331995	0.283338	0.332709	0.535751	0.12797	0.669975	0.510597	1.68448	0.733499	35.3846	1200.84	0.761308	0.985326	0.669975	0.378071	0.128724	0.356052	1.54e-06	8	7796	c
1101	678	87	14.6821	3.01346	8.52985	20.7198	558.942	47.6538	39.9827	0.814464	-0.981437	0.0506635	0.847928	0.899065	5.20038	0.725795	36.9621	1296.37	1.17912	1.43778	0.847928	0.416849	0.408283	0.722314	0.0322541	2.43961	0.719189	5.34387	0.563956	36.868	1288.63	1.1791	1.62714	2.43961	0.583076	0.211063	0.564653	1.51e-06	3	7796	c
1102	682	115	15.4303	3.9009	6.44174	22.8673	660.641	44.9803	41.84	0.815105	-1.27793	0.0537852	0.718639	0.902667	4.69165	0.735068	38.2762	1393.49	1.13538	1.36719	0.718639	0.38897	0.411108	0.712123	0.0358024	1.89273	0.74282	4.67979	0.578598	37.9135	1366	1.12805	1.53853	1.89273	0.538887	0.214705	0.556152	1.78e-06	7	13644	c
1103	653	99	14.2527	2.54276	9.49646	20.2477	719.013	89.8436	36.0932	0.70362	1.32056	0.0859914	0.540385	0.878127	3.21701	0.770152	38.105	1383.59	1.02044	1.19622	0.540385	0.349406	0.416731	0.68356	0.0599497	1.44714	0.657702	3.11386	0.620685	37.9255	1370.48	1.00029	1.35105	1.44714	0.503749	0.180127	0.484428	2.55e-06	8	13644	c
1104	759	119	15.2687	3.55284	9.2791	23.3213	777.702	75.2606	40.9606	0.771195	1.21249	0.105267	0.522631	0.823832	2.48333	0.778571	38.7284	1432.97	0.945309	1.12309	0.522631	0.346303	0.352948	0.618096	0.0774649	1.32219	0.536126	2.42516	0.631879	38.6201	1426.72	0.906067	1.25	1.32219	0.48487	0.116086	0.377849	2.56e-06	12	13644	c
1105	779	110	15.6413	2.73357	11.1891	22.1834	803.16	77.2746	38.8088	0.70765	-1.30257	0.100866	0.487705	0.862656	2.77549	0.789754	38.2725	1396.11	0.996579	1.161	0.487705	0.335318	0.410475	0.671554	0.0773248	1.15147	0.632753	2.56771	0.655026	38.1426	1387.78	0.958491	1.28562	1.15147	0.46308	0.172153	0.463763	2.59e-06	12	13644	c
1106	750	107	15.3064	3.77075	9.80553	22.7596	853.162	100.585	44.3168	0.842092	1.45115	0.0525099	0.781663	0.916064	5.6563	0.728461	35.7413	1212.41	1.17879	1.42486	0.781663	0.403126	0.417394	0.726898	0.0333463	2.10106	0.778143	5.73517	0.561532	35.6697	1207.35	1.16585	1.60345	2.10106	0.555809	0.229113	0.582748	2.78e-06	7	13644	c
1107	683	100	14.9121	4.01658	7.18311	22.1296	901.475	154.434	43.7691	0.863333	1.55993	0.060156	0.659891	0.902782	4.39386	0.747928	36.903	1293.28	1.1209	1.33856	0.659891	0.382306	0.418152	0.712189	0.0429676	1.71157	0.735712	4.23808	0.596084	36.475	1262.17	1.10644	1.48145	1.71157	0.529465	0.21481	0.547625	2.89e-06	10	2985	c
1108	513	93	12.9789	3.29058	6.61692	20.2051	1021.93	188.843	35.5232	0.824174	1.48969	0.0632724	0.630688	0.917581	4.82611	0.758307	37.5407	1341.19	1.11936	1.32806	0.630688	0.374908	0.447014	0.731063	0.0438193	1.59346	0.782143	4.65713	0.618389	37.5	1336.88	1.11536	1.46996	1.59346	0.51646	0.262588	0.598956	2.2e-06	12	11073	c
1109	632	93	14.1714	3.38963	7.72607	20.8598	1039.31	180.401	39.2426	0.807017	1.32115	0.0781804	0.516293	0.887734	3.29941	0.777402	37.7105	1352.04	1.05872	1.23372	0.516293	0.342692	0.429421	0.700469	0.0547345	1.26095	0.717265	3.22991	0.633974	37.5858	1343.3	1.03938	1.38021	1.26095	0.475459	0.217046	0.534231	2.01e-06	8	11073	c
1110	625	112	13.4749	3.36629	5.90827	19.4963	1061.11	193.69	37.0385	0.766807	1.23734	0.0632576	0.628099	0.893966	3.96179	0.751196	38.7342	1428.96	1.08139	1.29314	0.628099	0.373031	0.402975	0.69232	0.0456019	1.5963	0.728244	3.93701	0.600545	38.8778	1440.31	1.06038	1.44065	1.5963	0.513335	0.198036	0.520978	1.83e-06	5	11073	c
1111	739	102	15.1824	1.93791	11.7817	18.8452	1072.66	254.146	33.5963	0.409245	-1.51016	0.112461	0.752886	0.850512	3.51822	0.752027	35.5891	1205.1	1.00901	1.2337	0.752886	0.405867	0.357554	0.644658	0.0995267	1.54711	0.675201	3.38165	0.664447	35.5015	1200.09	0.974513	1.30858	1.54711	0.519777	0.192547	0.493267	1.57e-06	5	11073	c
1112	541	85	12.9298	3.10964	8.63765	19.1799	371.638	27.6282	36.6609	0.84069	-0.0974194	0.184245	0.408549	0.712267	1.70995	0.820775	36.2425	1260.47	0.773687	0.910686	0.408549	0.314274	0.312298	0.534897	0.136805	0.819533	0.4443	1.73739	0.715074	36.1996	1257.34	0.770664	1.03623	0.819533	0.415297	0.102888	0.326054	1.01e-06	8	26730	c
1113	463	81	11.7635	3.02179	5.46087	16.8865	558.246	74.3797	32.9529	0.792672	0.190066	0.109072	0.464789	0.824584	2.32482	0.792958	37.4953	1342.85	0.916366	1.07336	0.464789	0.328477	0.37543	0.625376	0.072303	1.15842	0.587985	2.40579	0.655096	37.3861	1334.61	0.915037	1.23281	1.15842	0.46316	0.16393	0.444513	7.94e-07	7	26730	c
1114	516	83	12.9413	3.78733	5.46602	20.0664	634.563	216.291	38.4651	0.8776	-0.229064	0.188458	0.406397	0.703633	1.68563	0.816938	40.1295	1553.16	0.749015	0.886357	0.406397	0.311279	0.279057	0.499828	0.142824	0.863946	0.351942	1.66657	0.698639	40.0703	1550.89	0.711846	0.968876	0.863946	0.40957	0.0736638	0.267248	1.08e-06	7	26730	c
1115	588	107	14.6188	5.41815	1.83199	23.1299	67.5542	344.603	47.2439	0.903332	1.47577	0.0637368	0.728994	0.839494	3.27093	0.711958	40.6653	1577.89	1.04792	1.29196	0.728994	0.385177	0.332867	0.634861	0.0416436	2.04637	0.559425	3.32238	0.547848	40.4173	1559.55	1.01807	1.46771	2.04637	0.556383	0.109459	0.395344	1.01e-06	6	1052	c
1116	671	98	14.339	3.36733	8.30009	19.6197	49.2632	487.432	39.3823	0.804421	0.979461	0.0647633	0.684548	0.85933	3.43316	0.733627	40.4884	1563.8	1.058	1.28813	0.684548	0.382941	0.360359	0.657516	0.0416239	1.91237	0.628099	3.57107	0.572004	40.2766	1547.57	1.04407	1.47276	1.91237	0.541717	0.147906	0.457829	1.1e-06	11	42315	c
1117	775	148	16.9013	6.72802	6.4979	30.453	166.326	624.668	57.0947	0.931413	0.322774	0.052473	0.829982	0.880139	4.46227	0.699295	39.7266	1503.95	1.11408	1.37934	0.829982	0.408462	0.363044	0.676488	0.0347731	2.14985	0.688771	4.45381	0.53802	39.5229	1488.47	1.09372	1.54475	2.14985	0.560848	0.167878	0.496537	8.73e-07	5	42315	c
1118	719	118	16.4021	6.47055	4.78014	27.678	384.476	671.048	57.1204	0.948797	-0.00372108	0.0631358	0.829541	0.86549	4.08356	0.715927	37.5285	1340.05	1.07929	1.33116	0.829541	0.418332	0.361844	0.666782	0.0495181	2.26829	0.620718	3.99025	0.58038	37.2764	1321.59	1.05633	1.44885	2.26829	0.58067	0.151613	0.459942	8.58e-07	2	1172	c
1119	650	96	14.1994	2.65113	8.7913	19.5947	848.294	422.788	34.8355	0.647219	-0.264957	0.0399055	0.935086	0.915637	6.54203	0.678389	37.5366	1341.16	1.20581	1.48384	0.935086	0.427658	0.39805	0.722251	0.026371	2.79857	0.741853	6.4205	0.505574	37.098	1308.18	1.19133	1.65677	2.79857	0.609599	0.194387	0.547755	4.3e-07	4	6944	c
1120	534	87	12.5114	3.15532	4.07158	17.6252	656.912	605.075	33.1713	0.715258	1.38738	0.156333	0.467408	0.689784	1.75336	0.793583	40.4442	1574.67	0.794136	0.955604	0.467408	0.329929	0.261689	0.500026	0.124596	0.946903	0.33513	1.7121	0.677876	40.3894	1574.05	0.739084	1.03812	0.946903	0.427804	0.0615949	0.252677	1.16e-06	9	9210	c
1121	708	108	15.6205	5.55101	5.89498	24.9561	527.873	877.07	51.8589	0.92078	0.876461	0.0627661	0.686223	0.890027	4.11996	0.739553	38.1631	1386.95	1.08004	1.30147	0.686223	0.386965	0.403935	0.694626	0.0394666	1.74375	0.731551	4.24783	0.578456	38.1656	1385.8	1.09068	1.47528	1.74375	0.528499	0.211323	0.542513	1.21e-06	5	37018	c
1122	679	121	15.3957	4.99827	6.7925	25.5072	671.124	1103.14	46.1785	0.873732	0.470946	0.0570842	0.8	0.879201	4.31129	0.72192	40.5568	1568.69	1.10751	1.36274	0.8	0.410074	0.372758	0.681456	0.0423845	2.04966	0.680743	4.21004	0.575365	40.4366	1559.45	1.08362	1.50557	2.04966	0.563436	0.176745	0.503145	8.27e-07	5	37018	c
1123	648	101	14.9015	4.85937	7.63431	22.7171	316.635	23.8661	47.6949	0.92489	0.25857	0.0434759	1.13666	0.870236	5.37975	0.667273	37.6486	1347.05	1.17029	1.49632	1.13666	0.461923	0.330304	0.668422	0.027504	3.4313	0.630668	5.64528	0.499391	37.5322	1338.09	1.15988	1.6858	3.4313	0.648172	0.14677	0.48409	5.3e-07	6	15585	c
1124	609	86	13.815	3.00905	9.4947	20.2653	233.978	32.6596	38.5269	0.829529	-0.0749983	0.129621	0.543728	0.739533	2.04376	0.779549	33.2222	1051.28	0.854729	1.0409	0.543728	0.35488	0.282629	0.538591	0.0843169	1.20075	0.476284	2.14638	0.640525	33.1557	1047.11	0.849036	1.18738	1.20075	0.463352	0.103845	0.349219	4.83e-07	2	1536	c
1125	602	80	13.5182	1.3255	10.6981	16.1617	88.3732	64.4198	30.4376	0.508006	-0.380103	0.205225	0.316704	0.741518	1.61262	0.852873	38.2356	1410.49	0.707521	0.81378	0.316704	0.278908	0.336676	0.529784	0.143866	0.770713	0.417861	1.66197	0.734875	38.185	1405.63	0.718316	0.959194	0.770713	0.408828	0.0913882	0.296249	4.43e-07	9	7170	c
1126	694	92	14.5277	2.08525	10.6501	19.3871	46.8178	119.092	36.1299	0.659499	-1.40569	0.0535604	1.27911	0.865343	5.74953	0.660881	34.5888	1135.28	1.15887	1.47247	1.27911	0.488317	0.335937	0.669455	0.0352389	3.79538	0.57053	5.41868	0.495795	34.0429	1097.04	1.1315	1.63865	3.79538	0.66959	0.120005	0.434472	3.87e-07	6	7170	c
1127	527	74	12.5231	1.31556	9.33509	15.2611	72.218	303.255	29.2926	0.560896	1.07702	0.108851	0.387734	0.869218	2.48237	0.81404	33.1237	1040.76	0.94884	1.0748	0.387734	0.300054	0.4435	0.676759	0.0767534	0.898925	0.702306	2.50981	0.692473	32.8989	1026.25	0.944123	1.22171	0.898925	0.425306	0.235793	0.527833	3.78e-07	3	1978	c
1128	566	96	12.7418	3.28349	4.05317	18.3181	171.503	396.824	34.467	0.736152	1.27004	0.0827853	0.612118	0.815085	2.65513	0.748903	39.7982	1513.22	0.975386	1.18016	0.612118	0.364853	0.331095	0.611484	0.0564826	1.53617	0.536578	2.65742	0.593267	39.5574	1495.27	0.954614	1.34181	1.53617	0.499283	0.112466	0.38441	5.83e-07	5	1852	c
1129	528	80	12.5853	1.89995	8.16241	15.6852	325.053	444.153	30.7885	0.670058	0.360627	0.200655	0.336211	0.698307	1.55721	0.837989	36.7181	1298.03	0.716236	0.824623	0.336211	0.283898	0.302375	0.504522	0.145921	0.669584	0.416269	1.57354	0.730853	36.6608	1293.92	0.712349	0.938267	0.669584	0.376254	0.0933613	0.296297	7.53e-07	5	1352	c
1130	621	85	13.6576	1.56631	10.3528	17.4664	355.084	420.272	31.8245	0.590792	0.0515977	0.100097	0.561697	0.780916	2.28192	0.765938	39.4212	1485.89	0.933204	1.12174	0.561697	0.355403	0.31651	0.586625	0.0752662	1.12915	0.530096	2.20147	0.634686	39.3469	1482.38	0.892979	1.22994	1.12915	0.448056	0.117462	0.37721	7.24e-07	4	1676	c
1131	537	90	12.5322	2.61115	7.29492	19.0051	369.146	442.717	31.449	0.649691	0.349638	0.184004	0.337865	0.740125	1.65005	0.836506	34.0952	1115.17	0.734828	0.843381	0.337865	0.283985	0.325625	0.52883	0.129126	0.672489	0.524371	1.70695	0.716157	33.9563	1104.74	0.75109	0.971082	0.672489	0.36546	0.1355	0.362816	7.9e-07	4	1676	c
1132	504	80	12.4293	2.90817	7.57003	17.4078	387.741	403.322	34.3593	0.805847	0.0879976	0.076998	0.706133	0.837789	3.17658	0.736533	38.5483	1416.45	1.01894	1.25504	0.706133	0.391184	0.342338	0.636014	0.0561886	1.48485	0.661497	3.19326	0.598176	38.3427	1401.67	1.00121	1.37494	1.48485	0.49827	0.168978	0.473427	7.14e-07	6	3365	c
1133	667	84	14.1693	1.12319	12.3053	16.8415	508.089	393.363	32.0094	0.53269	-0.148995	0.179989	0.373513	0.695752	1.61383	0.819905	39.6019	1511.34	0.752733	0.87364	0.373513	0.295411	0.284138	0.501242	0.131998	0.775128	0.375728	1.62083	0.690119	39.4906	1504.21	0.72846	0.985595	0.775128	0.382459	0.0741168	0.270286	8.75e-07	8	1930	c
1134	665	100	14.1471	4.23606	3.41563	21.2068	528.866	325.007	41.8772	0.85152	0.122477	0.0823752	0.61635	0.812897	2.64709	0.753501	38.4172	1407.76	0.976738	1.18034	0.61635	0.370126	0.336971	0.616591	0.0554316	1.45098	0.565917	2.67132	0.607696	38.1961	1391.87	0.958577	1.34703	1.45098	0.499475	0.129364	0.412288	7.12e-07	6	1110	c
1135	604	100	13.0484	3.18936	6.10725	18.8536	600.369	262.101	35.1597	0.713843	1.44362	0.0896233	0.652542	0.784159	2.51163	0.747056	38.5482	1418.2	0.960857	1.18361	0.652542	0.378725	0.298755	0.583203	0.0590621	1.64461	0.495393	2.6296	0.596019	38.5066	1415.78	0.944636	1.35713	1.64461	0.520585	0.100822	0.366322	6.62e-07	5	782	c
1136	661	86	14.1518	1.87473	10.441	17.3082	595.041	228.228	34.3953	0.676287	0.709588	0.0967272	0.537475	0.808725	2.40498	0.772144	38.5206	1416.65	0.94976	1.13564	0.537475	0.349413	0.338515	0.60865	0.0639451	1.27645	0.547947	2.41184	0.623891	38.4266	1410.48	0.928485	1.2881	1.27645	0.47367	0.11555	0.382259	5.93e-07	4	1020	c
1137	762	103	16.0164	4.16528	9.45766	23.3874	71.8069	552.336	45.8553	0.867234	1.29194	0.0679201	1.03904	0.719632	2.853	0.67907	34.7007	1141.29	1.01214	1.32623	1.03904	0.451485	0.22539	0.534798	0.0476224	2.59636	0.318537	2.90499	0.535095	34.5175	1131.14	0.959855	1.45864	2.59636	0.604116	0.0595526	0.292644	4.83e-07	3	1509	c
1138	628	90	14.2042	2.73631	9.30346	19.7591	25.0752	664.955	37.5877	0.780414	-0.372268	0.0348754	1.27856	0.867031	5.80772	0.649784	32.2484	981.006	1.21531	1.56145	1.27856	0.484148	0.330435	0.678984	0.0247609	3.20324	0.663312	5.75699	0.496169	32.0665	969.212	1.18958	1.70544	3.20324	0.638928	0.157048	0.502224	3.28e-07	2	977	c
1139	469	72	11.8312	1.89988	8.79447	15.4761	586.23	472.965	30.428	0.734697	0.186978	0.0954397	0.535429	0.797535	2.32228	0.767943	29.7731	837.265	0.919864	1.09965	0.535429	0.344876	0.327807	0.591802	0.0716076	1.16877	0.519145	2.2153	0.633249	29.5919	827.945	0.882146	1.21836	1.16877	0.454785	0.109407	0.362656	9.4e-07	5	3479	c
1140	630	92	13.5654	2.67682	6.35112	18.0371	393.446	609.141	34.3934	0.683259	0.926195	0.0936738	0.629771	0.763313	2.33039	0.747141	32.5831	1006.7	0.928666	1.13737	0.629771	0.368083	0.292048	0.567664	0.0689736	1.3842	0.476505	2.32208	0.613824	32.5691	1007.28	0.893071	1.26071	1.3842	0.489886	0.0930415	0.340228	7.88e-07	2	15831	c
1141	653	107	13.7788	2.9138	4.54664	18.8362	453.758	696.8	35.1204	0.646182	-1.47888	0.0385205	1.03462	0.901634	6.25904	0.679335	34.2053	1107.92	1.22174	1.5289	1.03462	0.448214	0.374583	0.711149	0.0272152	2.87433	0.714571	6.03511	0.518507	33.8546	1084.38	1.18785	1.67459	2.87433	0.616064	0.180644	0.531883	7.67e-07	7	15831	c
1142	520	102	12.5203	4.01742	2.69085	18.8103	501.734	733.725	35.7766	0.754927	0.295173	0.142158	0.459103	0.743368	1.89448	0.800211	34.2976	1123.56	0.824574	0.984141	0.459103	0.329309	0.299702	0.541434	0.0939335	0.983834	0.497266	1.97848	0.674365	34.3233	1124.36	0.835588	1.14029	0.983834	0.43482	0.113879	0.358658	7.15e-07	6	15831	c
1143	631	80	13.7423	1.19544	11.4796	16.6352	552.918	850.975	31.837	0.564859	0.0152106	0.0986844	0.577246	0.816525	2.57309	0.762762	36.9366	1299.95	0.96114	1.15172	0.577246	0.360006	0.344097	0.616754	0.0740571	1.19573	0.583313	2.43481	0.649822	36.8505	1294.96	0.928175	1.25732	1.19573	0.470836	0.1443	0.421436	6.88e-07	5	15831	c
1144	794	105	15.4548	2.0103	11.6306	19.1123	577.57	868.351	36.8953	0.620754	-0.816275	0.0580899	0.84752	0.839317	3.63725	0.711715	36.682	1276.5	1.08982	1.36133	0.84752	0.420185	0.330869	0.645818	0.0410315	2.0159	0.593918	3.48213	0.558382	36.4292	1259.2	1.05563	1.50346	2.0159	0.55065	0.134607	0.44165	6.28e-07	6	15831	c
1145	644	108	13.5507	2.7121	6.51453	18.0907	665.506	912.566	30.9264	0.39933	-1.06297	0.111438	0.483221	0.805157	2.24003	0.78104	39.6653	1506.44	0.910132	1.07315	0.483221	0.32921	0.339206	0.595744	0.0824512	1.04909	0.558531	2.18818	0.64538	39.6382	1506.1	0.877408	1.18811	1.04909	0.433631	0.1375	0.401123	4.48e-07	5	4747	c
1146	568	77	13.0294	0.915762	11.6119	15.6414	705.847	912.472	28.6553	0.435623	0.745995	0.143088	0.455269	0.715784	1.80092	0.804403	32.3354	997.054	0.802757	0.959288	0.455269	0.329249	0.284292	0.521852	0.101064	0.936759	0.435217	1.82931	0.683399	32.3913	1000.71	0.794877	1.07667	0.936759	0.429553	0.0933775	0.31637	4.2e-07	4	4747	c
1147	766	115	15.5454	2.73104	10.0072	21.3496	736.625	918.324	36.0997	0.533071	0.576626	0.0712271	0.680977	0.838028	3.10215	0.738674	37.1927	1316.06	1.02185	1.2478	0.680977	0.38429	0.342907	0.635098	0.0480236	1.62665	0.608427	3.07707	0.589742	37.1113	1310.29	1.00576	1.40416	1.62665	0.516035	0.140114	0.436672	3.97e-07	3	4747	c
1148	624	101	13.7609	3.15057	8.38194	20.8079	803.88	672.251	37.7401	0.799118	0.263879	0.157325	0.383355	0.765742	1.81823	0.824881	32.9784	1038.28	0.801032	0.931217	0.383355	0.304066	0.34007	0.563208	0.115716	0.834862	0.487899	1.81513	0.712477	33.0037	1040.73	0.780954	1.04179	0.834862	0.415128	0.119929	0.352785	5.15e-07	4	12227	c
1149	713	103	15.1372	3.60589	7.92435	22.1247	584.867	50.9905	41.2983	0.807095	0.771274	0.0738387	0.684644	0.827311	2.9823	0.740824	37.6779	1350.66	1.02523	1.25185	0.684644	0.384837	0.341902	0.635023	0.0479442	1.63867	0.586159	2.97983	0.589816	37.4675	1335.94	1.00306	1.40329	1.63867	0.518871	0.134199	0.427545	7.53e-07	6	1913	c
1150	649	93	14.0274	2.21815	10.227	18.2766	570.093	69.1178	32.9182	0.541102	1.05282	0.0742432	0.63543	0.842654	3.01921	0.740485	37.8315	1361.99	1.0273	1.2372	0.63543	0.369037	0.353671	0.642117	0.0511249	1.70069	0.620868	3.24288	0.572695	37.763	1357.26	1.02071	1.40468	1.70069	0.521869	0.149721	0.450933	8.01e-07	9	1913	c
1151	231	53	8.21608	1.59958	4.90798	11.8151	517.744	99.9229	21.4422	0.72505	0.388224	0.168612	0.445247	0.6857	1.70831	0.794705	34.7485	1156.96	0.76953	0.919989	0.445247	0.319638	0.25896	0.489307	0.130969	0.962366	0.379046	1.77491	0.680108	34.6935	1153.82	0.75712	1.03614	0.962366	0.426794	0.0844227	0.295436	8e-07	11	15585	c
1152	652	109	14.8766	4.47119	5.50615	23.5149	728.431	116.66	44.8994	0.875158	0.00603164	0.0427875	0.961093	0.896271	5.63269	0.691512	35.4611	1190.9	1.20719	1.49412	0.961093	0.437658	0.38797	0.716137	0.0280432	2.62591	0.700581	5.38502	0.527997	35.0091	1159.34	1.17969	1.67258	2.62591	0.605137	0.17927	0.529736	7.11e-07	3	2946	c
1153	547	93	12.0018	3.97525	0.649893	17.9854	758.932	137.639	33.0533	0.650111	0.267343	0.10953	0.64668	0.699939	2.07758	0.745639	29.8915	845.587	0.875558	1.08488	0.64668	0.37691	0.241543	0.507669	0.0768436	1.50753	0.366579	2.18999	0.604643	29.7699	839.148	0.858042	1.22181	1.50753	0.505354	0.0607165	0.271391	7.22e-07	2	2946	c
1154	631	85	13.7666	1.92738	9.49799	16.9834	767.393	199.669	33.7746	0.688134	0.0536455	0.111225	0.454737	0.817843	2.2482	0.799411	38.8893	1447.86	0.898145	1.0536	0.454737	0.327042	0.367503	0.614591	0.0719785	1.15669	0.564868	2.32913	0.662251	38.9137	1448.69	0.906771	1.23531	1.15669	0.469755	0.137745	0.40868	7.39e-07	3	9046	c
1155	728	91	15.1067	2.0293	11.4143	19.648	704.79	245.691	36.3883	0.651584	0.54235	0.0612015	0.718545	0.887474	4.1928	0.730618	34.7833	1144.81	1.12685	1.3491	0.718545	0.392772	0.408321	0.706765	0.0428705	1.8179	0.666535	3.72577	0.567772	34.4992	1126.48	1.07181	1.4828	1.8179	0.529543	0.180785	0.505222	7.58e-07	5	9046	c
1156	700	126	14.8161	2.96468	8.06388	19.4462	786.595	337.05	38.4981	0.755837	0.397182	0.111859	0.394339	0.869171	2.50707	0.814463	38.9604	1453.58	0.908544	1.03773	0.394339	0.304496	0.427154	0.65641	0.0780079	0.978114	0.684105	2.54817	0.676599	38.8872	1447.26	0.912935	1.18992	0.978114	0.437225	0.199736	0.481722	9.08e-07	6	3399	c
1157	701	86	14.681	2.57724	10.4854	19.3785	889.254	329.216	39.3352	0.784382	0.376121	0.0437803	1.14399	0.8922	6.30606	0.670369	32.2378	982.461	1.21559	1.52196	1.14399	0.468568	0.372577	0.708417	0.0305565	3.45912	0.669862	6.2389	0.506377	32.0189	968.198	1.18542	1.68013	3.45912	0.64617	0.172912	0.521922	8.32e-07	5	836	c
1158	733	94	14.9338	2.90173	9.60091	20.1628	890.446	434.647	41.2562	0.78548	0.293004	0.0517809	1.21978	0.905471	7.45187	0.676693	30.4525	878.343	1.23345	1.51092	1.21978	0.483288	0.429043	0.749595	0.0351833	3.57919	0.720542	7.40381	0.526282	30.2428	864.036	1.22561	1.66931	3.57919	0.659173	0.237552	0.601972	7.95e-07	1	868	c
1159	765	93	15.4403	2.3624	11.5304	20.7464	993.039	412.602	38.2456	0.703362	1.06656	0.0388335	1.14148	0.877528	5.66015	0.669525	34.5873	1132.3	1.1987	1.52131	1.14148	0.464368	0.34752	0.687488	0.0260882	3.1312	0.666601	5.69586	0.517002	34.3207	1114.48	1.17215	1.68547	3.1312	0.633929	0.166794	0.513938	7.59e-07	6	931	c
1160	770	88	15.1902	0.530799	14.1373	16.3512	1051.07	466.344	32.1725	0.23014	-1.3277	0.076056	0.596857	0.859493	3.12394	0.764298	37.1168	1309.35	1.04119	1.24622	0.596857	0.367593	0.38362	0.668225	0.0515402	1.58006	0.638714	3.18671	0.62695	37.0772	1307.1	1.02268	1.40609	1.58006	0.52089	0.184445	0.498506	7e-07	2	952	c
1161	487	71	12.0312	1.08863	9.97219	14.2293	1197.94	578.784	27.6054	0.52692	-0.047974	0.110312	0.469846	0.840573	2.47355	0.795998	36.8361	1294.24	0.936033	1.09756	0.469846	0.331804	0.38443	0.637861	0.077081	1.05607	0.638432	2.46041	0.668224	36.785	1290.73	0.925023	1.24379	1.05607	0.451973	0.1732	0.458367	6.28e-07	3	4079	c
1162	604	79	13.4968	1.46308	11.4571	16.9929	1225.87	597.007	32.5445	0.649461	-0.0203516	0.0664715	0.613087	0.894253	3.89883	0.763549	35.1489	1170.36	1.09922	1.30379	0.613087	0.372557	0.429988	0.714419	0.0470916	1.39548	0.750921	3.80128	0.644167	34.9548	1157.42	1.07842	1.43165	1.39548	0.500748	0.250158	0.579578	6.7e-07	3	4079	c
1163	684	108	13.7874	3.61119	4.92874	19.675	1235.51	634.372	36.724	0.694291	-1.10797	0.0940832	0.524108	0.839268	2.63038	0.776989	36.7295	1285.71	0.956403	1.13169	0.524108	0.345695	0.367847	0.632115	0.0675297	1.19728	0.620397	2.57701	0.658263	36.6156	1277.96	0.938576	1.27239	1.19728	0.473925	0.163115	0.449737	7.37e-07	4	1154	c
1164	694	94	14.4264	1.72109	9.80291	17.9672	1155.39	686.618	32.4772	0.420705	-1.28212	0.04995	1.16597	0.840145	4.64694	0.662416	33.9484	1090.05	1.13634	1.45224	1.16597	0.470268	0.309933	0.642608	0.033397	3.0625	0.558169	4.46569	0.495865	33.8894	1086.06	1.09828	1.60888	3.0625	0.629259	0.104936	0.403988	7.13e-07	3	1791	c
1165	738	85	14.8956	0.647206	13.8491	16.5073	1127.33	669.14	32.7556	0.427779	0.903894	0.0487975	1.2162	0.806214	4.13799	0.64814	34.9629	1157.02	1.1149	1.44717	1.2162	0.476166	0.277927	0.610896	0.0371098	3.24225	0.470421	4.06115	0.50617	34.9291	1155.28	1.07234	1.58821	3.24225	0.646651	0.0780543	0.34789	6.6e-07	3	1791	c
1166	671	86	14.4001	2.59066	9.71183	18.7311	1048.26	878.409	38.0439	0.789577	-0.50207	0.182457	0.487179	0.742704	1.94673	0.810375	26.1566	646.844	0.788432	0.951438	0.487179	0.340945	0.312191	0.544702	0.151175	1.00169	0.418662	1.86154	0.711994	26.0898	644.331	0.754342	1.01893	1.00169	0.450341	0.099439	0.318017	5.71e-07	4	11367	c
1167	524	85	12.3536	2.6887	6.25303	16.1877	1037.67	915.793	33.0407	0.748822	-1.44706	0.0818405	0.639302	0.802705	2.62017	0.745613	37.7506	1359.35	0.960588	1.17376	0.639302	0.37391	0.319673	0.600168	0.0622172	1.3296	0.568862	2.54196	0.628159	37.6749	1355.99	0.91685	1.264	1.3296	0.488147	0.138077	0.413458	4.21e-07	3	11367	c
1168	601	93	13.9455	4.27102	6.88475	21.043	1189.06	850.957	44.1197	0.90184	0.142153	0.0747963	0.777382	0.884262	4.35836	0.728851	33.1772	1042.01	1.09369	1.31925	0.777382	0.409275	0.401755	0.696292	0.058685	1.95802	0.695695	4.21719	0.589874	33.0382	1032.75	1.07192	1.44662	1.95802	0.560398	0.211456	0.538234	6.18e-07	3	911	c
1169	518	78	12.7885	3.02725	8.2319	18.0319	1236.88	863.603	36.8243	0.851116	0.341241	0.0435788	1.69576	0.815355	5.59197	0.60529	30.9365	902.574	1.17237	1.54621	1.69576	0.533926	0.274181	0.623029	0.031622	4.32965	0.498189	5.31402	0.463409	30.75	890.363	1.12844	1.65398	4.32965	0.698043	0.0974499	0.39479	5.64e-07	5	800	c
1170	687	84	14.524	1.81523	11.5875	18.1937	1270.83	889.323	35.5594	0.703246	0.578527	0.0658545	0.980769	0.751982	2.97722	0.687145	34.1808	1106.34	1.02343	1.31941	0.980769	0.441267	0.247191	0.557444	0.0592106	1.87113	0.451777	2.70654	0.587679	34.1876	1109.87	0.947286	1.36036	1.87113	0.545509	0.08329	0.333926	4.55e-07	4	862	c
1171	678	89	14.4793	2.10069	11.1408	18.8324	1471.78	831.934	36.3893	0.731995	0.904787	0.0907197	0.531948	0.852298	2.80075	0.775421	35.8028	1219.15	0.982128	1.16085	0.531948	0.347477	0.383454	0.650741	0.0669217	1.10083	0.673309	2.68481	0.653418	35.6992	1212.31	0.962026	1.277	1.10083	0.451394	0.190746	0.485857	4.25e-07	3	5932	c
1172	752	108	15.5108	3.3306	9.01692	22.0876	1395.41	837.634	42.3978	0.816499	1.40746	0.100816	0.473442	0.914065	3.75465	0.793449	36.4706	1268.21	1.00707	1.16578	0.473442	0.330914	0.448691	0.700371	0.0699429	1.04361	0.811146	3.76301	0.665865	36.4	1262.35	1.0115	1.3095	1.04361	0.446362	0.278894	0.588075	5.53e-07	7	5932	c
1173	527	81	12.9399	2.9614	7.7769	18.6408	1402.62	894.409	35.9	0.83953	0.320087	0.0695083	0.777947	0.817669	3.13334	0.723831	34.0137	1094.93	1.04136	1.28653	0.777947	0.407518	0.326903	0.628596	0.0537018	1.60398	0.584166	2.92863	0.603267	33.9181	1090.32	0.990859	1.3737	1.60398	0.518483	0.143802	0.437856	3.71e-07	3	5932	c
1174	699	90	14.7307	1.63206	12.2265	18.0806	1441.74	750.678	35.1038	0.646188	1.14616	0.0725239	0.731829	0.805997	2.88613	0.726817	35.5207	1198.32	1.00245	1.23738	0.731829	0.39555	0.315	0.608589	0.0566903	1.48304	0.574876	2.74424	0.603554	35.496	1198	0.963235	1.32614	1.48304	0.50242	0.146289	0.434576	6.48e-07	2	3224	c
1175	637	93	13.6618	1.92888	6.96537	16.3615	1487.09	775.822	30.5263	0.355698	-1.56779	0.11682	0.53772	0.797509	2.32777	0.784451	35.2879	1186.45	0.912412	1.09323	0.53772	0.353968	0.340119	0.600923	0.0953382	1.13167	0.544446	2.24208	0.687754	35.1779	1180.22	0.879482	1.1721	1.13167	0.470239	0.15075	0.41707	4.86e-07	2	3224	c
1176	620	96	13.507	3.47952	5.9254	18.7663	1492.44	512.119	38.3262	0.793852	0.343656	0.0483644	0.991778	0.88548	5.33016	0.688844	34.0043	1096.37	1.14033	1.43508	0.991778	0.442719	0.35555	0.67997	0.037446	2.52533	0.701627	5.23184	0.565699	33.8649	1088.17	1.09653	1.54668	2.52533	0.59222	0.188386	0.524466	4.4e-07	4	845	c
1177	756	87	15.097	1.40422	12.3383	18.1489	1413.23	454.06	35.0043	0.59073	-0.185283	0.199686	0.368072	0.73119	1.68463	0.838132	29.7895	846.292	0.739154	0.861936	0.368072	0.298881	0.329374	0.536786	0.160255	0.645066	0.502576	1.64841	0.749926	29.7732	845.979	0.720988	0.918737	0.645066	0.37849	0.13583	0.353991	5.59e-07	3	6197	c
1178	799	101	15.6185	2.81982	9.69036	20.8512	1367.48	452.255	38.992	0.676066	-0.523844	0.040819	1.24462	0.891614	6.74159	0.668456	31.0619	910.253	1.25366	1.57465	1.24462	0.481647	0.379554	0.722334	0.0314505	3.02601	0.688073	5.85051	0.52271	30.6647	884.588	1.19931	1.68566	3.02601	0.626261	0.191479	0.547892	6.03e-07	4	6197	c
1179	473	75	11.8526	1.84689	7.58671	15.7539	1324.68	500.505	28.6242	0.632447	-0.838916	0.149224	0.429469	0.744476	1.84037	0.807196	31.9657	974.952	0.788497	0.932971	0.429469	0.318682	0.301681	0.531152	0.119733	0.912409	0.453931	1.83543	0.689781	31.9635	975.653	0.766969	1.03954	0.912409	0.424316	0.100623	0.322946	6.28e-07	2	6197	c
1180	457	73	11.9862	2.87348	6.91276	16.8918	1404.81	204.75	34.5662	0.85858	0.380918	0.096025	0.670975	0.795344	2.63928	0.757579	24.0964	540.661	0.971164	1.18418	0.670975	0.386863	0.334909	0.615599	0.0776286	1.35844	0.509157	2.38378	0.654836	23.8312	529.478	0.911705	1.24604	1.35844	0.485361	0.141736	0.41606	6.75e-07	4	11397	c
1181	766	90	15.5818	2.55069	10.6688	19.936	1332.94	226.01	39.7001	0.767315	-0.857853	0.0707089	0.852566	0.782183	2.95707	0.715915	35.3548	1185.85	1.02002	1.29035	0.852566	0.422269	0.28121	0.586869	0.0492454	2.05378	0.475701	2.9586	0.581397	35.3096	1184.15	0.982249	1.42812	2.05378	0.56284	0.0934582	0.361458	7.08e-07	5	11397	c
1182	421	64	11.393	1.72157	8.07776	14.3679	1348.79	315.352	29.2015	0.751927	0.888167	0.063837	0.89598	0.808507	3.33945	0.700484	35.5622	1199.61	1.0492	1.32144	0.89598	0.426249	0.299414	0.609971	0.0491766	2.04098	0.566198	3.35243	0.563575	35.4617	1193.93	1.01518	1.43846	2.04098	0.544515	0.130178	0.426039	6.38e-07	3	11397	c
1183	564	79	13.2165	2.4507	9.91168	17.818	1444.17	290.016	35.1957	0.792666	-1.32388	0.115056	0.580553	0.703166	1.97791	0.753765	29.6902	833.933	0.870023	1.06369	0.580553	0.35614	0.252549	0.514476	0.096755	0.983402	0.455801	1.90353	0.662656	29.7344	838.594	0.821411	1.12512	0.983402	0.430565	0.0896109	0.3165	5.58e-07	5	11397	c
1184	659	108	14.9587	5.26473	5.26709	22.9448	1229.88	73.5664	47.9569	0.910984	-0.438157	0.0586608	0.717436	0.875716	3.88627	0.725071	35.7113	1208.72	1.10078	1.34371	0.717436	0.390049	0.373875	0.678908	0.0383416	1.93849	0.668176	3.92096	0.567053	35.5448	1198.04	1.07316	1.50818	1.93849	0.546976	0.164999	0.487396	5.47e-07	4	2882	c
1185	616	122	13.5534	3.64655	6.7477	21.6179	1252.86	82.6912	37.3132	0.705031	-0.0716732	0.052914	0.821413	0.87985	4.41827	0.703376	34.9805	1159.37	1.12022	1.3742	0.821413	0.410329	0.381398	0.690441	0.0369875	2.28083	0.680123	4.56517	0.543354	34.74	1142.86	1.1115	1.54337	2.28083	0.581596	0.184698	0.519159	5.59e-07	2	2882	c
1186	565	88	13.3915	3.28492	6.716	19.9736	1165.25	130.228	37.9986	0.818283	-1.08059	0.0444122	1.0275	0.868631	4.91074	0.687973	34.2252	1107.84	1.16121	1.46755	1.0275	0.447431	0.35309	0.683389	0.0313055	2.23347	0.705365	4.79024	0.544528	33.9855	1091.66	1.14146	1.59855	2.23347	0.562941	0.197988	0.544247	7.16e-07	6	10219	c
1187	710	113	14.0401	3.53659	6.2105	19.4585	1218.14	208.883	36.5219	0.666578	-1.46577	0.104465	0.52518	0.78386	2.21491	0.78103	30.5434	883.117	0.89908	1.07909	0.52518	0.348452	0.321273	0.581684	0.0739831	1.13644	0.555036	2.277	0.657143	30.5746	885.153	0.889942	1.20837	1.13644	0.453334	0.143371	0.412606	7.35e-07	7	10219	c
1188	742	92	15.2027	2.40484	10.9021	20.162	1273.44	183.364	38.2474	0.736035	-0.729734	0.0752687	0.688168	0.855564	3.38226	0.745095	35.4465	1191.05	1.06329	1.28857	0.688168	0.386607	0.368941	0.66464	0.0577779	1.59016	0.663555	3.36318	0.603985	35.3458	1185.14	1.03426	1.4211	1.59016	0.516359	0.176522	0.490442	7.26e-07	4	10219	c
1189	728	90	14.7829	1.13667	12.3313	17.2451	1286.36	126.186	33.5423	0.495941	0.886979	0.0667517	0.862845	0.824563	3.45913	0.70727	33.2242	1042.37	1.07776	1.33882	0.862845	0.420882	0.325209	0.636746	0.0477795	1.97031	0.558651	3.23215	0.567299	33.0516	1032.78	1.02307	1.4655	1.97031	0.551415	0.121305	0.415236	6.54e-07	3	10219	c
1190	652	83	13.9372	0.847585	11.8956	15.5202	1271.12	147.897	30.9897	0.447942	0.453224	0.0544842	0.829545	0.868454	4.15307	0.715403	34.4026	1118.57	1.13412	1.39904	0.829545	0.413635	0.365405	0.681912	0.0352988	2.12034	0.658017	4.10007	0.55035	34.3441	1114.85	1.10895	1.57564	2.12034	0.56371	0.156964	0.485164	6.96e-07	4	10219	c
1191	754	93	15.2854	2.35974	10.0597	20.6367	902.187	33.9216	38.4308	0.704075	0.903869	0.0569931	0.692038	0.906344	4.69459	0.743112	35.6103	1202.52	1.13669	1.36074	0.692038	0.3829	0.429036	0.724176	0.0368589	1.83013	0.746601	4.61117	0.580652	35.4579	1191.09	1.12896	1.53684	1.83013	0.531366	0.229865	0.573675	6.15e-07	8	6791	c
1192	629	94	14.182	3.86302	6.79024	20.2894	916.121	77.9064	41.0077	0.858948	0.871121	0.0886202	0.554894	0.831433	2.64591	0.772596	37.9566	1374.02	0.970291	1.16284	0.554894	0.356185	0.358507	0.63108	0.0600289	1.36431	0.604264	2.72377	0.636278	37.7621	1359.91	0.960253	1.33024	1.36431	0.495504	0.149647	0.439991	7.66e-07	7	6791	c
1193	545	82	12.863	1.49685	9.77292	15.9671	883.419	66.0493	29.6652	0.546231	0.184415	0.0780418	0.631139	0.844127	3.02454	0.748084	36.4907	1264.52	1.03576	1.24974	0.631139	0.371998	0.361452	0.651029	0.0494271	1.76507	0.580084	3.1017	0.587502	36.4137	1259.51	1.01788	1.43598	1.76507	0.529019	0.13861	0.438796	7.3e-07	10	6791	c
1194	725	94	15.3533	4.21277	9.39364	22.3151	801.241	84.469	46.0759	0.891875	0.343699	0.0454606	1.0472	0.850227	4.49597	0.682405	35.2982	1179.21	1.1474	1.45847	1.0472	0.45352	0.327781	0.659903	0.0302434	2.98905	0.598433	4.72173	0.520237	35.1268	1167.59	1.1313	1.64594	2.98905	0.627092	0.137772	0.464922	7.26e-07	4	876	c
1195	767	119	14.4955	3.70148	4.44608	18.9642	1027.81	213.432	38.0538	0.687375	0.455703	0.14619	0.411806	0.758755	1.8535	0.812539	39.2648	1482.01	0.806948	0.946129	0.411806	0.312707	0.329007	0.55771	0.111635	0.852761	0.479118	1.81857	0.693252	39.089	1469.4	0.78774	1.04415	0.852761	0.413567	0.107503	0.334454	7.9e-07	5	2031	c
1196	783	93	15.5695	2.39055	12.0619	20.1288	1034.46	277.801	39.0311	0.74318	0.334807	0.0994291	0.66442	0.796181	2.62993	0.747844	36.2473	1251.24	0.957343	1.16925	0.66442	0.383845	0.318249	0.597989	0.0807666	1.61048	0.497196	2.6015	0.624288	36.1969	1249.45	0.91728	1.27518	1.61048	0.519563	0.114285	0.378436	7.56e-07	7	1660	c
1197	612	86	13.6893	2.62526	8.97817	19.1561	1085.46	266.603	36.6546	0.798908	0.190507	0.0652387	0.801218	0.818577	3.20815	0.72147	37.244	1319.26	1.03312	1.2896	0.801218	0.411209	0.309614	0.613598	0.051186	2.00936	0.531075	3.14252	0.581103	37.0543	1306.82	0.995181	1.39905	2.00936	0.556112	0.109213	0.386311	7.4e-07	4	7932	c
1198	508	79	12.4472	3.12372	5.95281	16.9715	1110.58	293.05	35.6432	0.844124	0.37063	0.077467	0.712401	0.778565	2.6086	0.726755	37.5673	1345.07	0.970211	1.2054	0.712401	0.388702	0.290777	0.580031	0.0521823	1.76734	0.473977	2.6799	0.579813	37.4318	1335.84	0.950461	1.36131	1.76734	0.531111	0.0951748	0.356635	7.13e-07	4	7932	c
1199	619	93	13.6115	1.98053	8.47308	17.4219	1088.19	358.522	31.083	0.493102	0.472452	0.188785	0.303201	0.771767	1.66423	0.850995	39.7582	1524.21	0.747181	0.842526	0.303201	0.269632	0.368736	0.562805	0.14158	0.602941	0.540273	1.65576	0.744853	39.739	1522.01	0.751865	0.952344	0.602941	0.359472	0.146367	0.373678	7.04e-07	5	1407	c
1200	511	72	12.2833	0.587913	10.8056	13.522	769.753	440.19	27.7376	0.364586	-0.281418	0.0577873	1.77917	0.865321	7.60521	0.6306	29.6646	836.166	1.17731	1.51289	1.77917	0.546869	0.339257	0.678997	0.0439073	5.30176	0.597338	7.58339	0.498114	29.3062	813.525	1.15491	1.65228	5.30176	0.727637	0.143889	0.475387	8.83e-07	1	592	c
1201	688	93	14.4977	2.09154	10.4202	17.9594	150.614	21.2819	36.0147	0.681311	-0.544157	0.0564244	0.860725	0.900753	5.33629	0.722769	32.3306	987.4	1.17112	1.41843	0.860725	0.425807	0.415178	0.724154	0.0404906	2.02291	0.745315	4.9714	0.587197	32.0982	971.541	1.15182	1.54341	2.02291	0.553024	0.234891	0.580401	3.61e-07	3	4264	c
1202	420	66	11.1314	1.23771	8.97304	13.8247	107.903	63.822	26.8509	0.614609	1.49752	0.0987456	0.490711	0.8587	2.73642	0.790775	27.1941	694.79	0.957973	1.11906	0.490711	0.335098	0.395967	0.651527	0.0768243	1.04249	0.694905	2.70847	0.669122	27.0425	687.606	0.930904	1.22486	1.04249	0.449609	0.202678	0.491298	5.33e-07	4	4264	c
1203	397	70	10.8706	1.89798	7.82842	13.9016	124.584	228.005	28.8492	0.760875	0.251146	0.0368983	1.11588	0.883091	5.77245	0.667152	33.5262	1062.44	1.20803	1.51983	1.11588	0.457495	0.35922	0.697119	0.0281889	3.03881	0.679765	5.74466	0.511115	33.3672	1052.19	1.17634	1.63719	3.03881	0.608689	0.197602	0.549191	6.82e-07	7	1195	c
1204	464	69	11.7681	1.35886	8.69769	14.3657	73.8185	257.054	27.7242	0.584617	1.08558	0.170379	0.341027	0.819067	1.94241	0.842643	30.7796	902.323	0.798013	0.908012	0.341027	0.288781	0.410162	0.611612	0.135833	0.609756	0.656026	1.88634	0.762439	30.8	902.266	0.81117	1.00158	0.609756	0.371052	0.23002	0.478747	6.81e-07	6	1667	c
1205	443	69	11.475	1.47482	7.85593	14.281	170.602	269.152	26.5065	0.445707	-0.234531	0.041763	1.02726	0.88094	5.31402	0.669576	33.5239	1061.98	1.18581	1.48499	1.02726	0.438036	0.360032	0.692102	0.0282936	2.71835	0.688991	5.3702	0.514937	33.3592	1051.21	1.16523	1.64923	2.71835	0.60789	0.177035	0.523533	7.39e-07	4	4006	c
1206	560	86	13.0373	2.1386	9.02782	16.8265	184.972	292.085	30.7061	0.520135	-0.574865	0.121656	0.427273	0.862344	2.55195	0.809904	36.8694	1298.91	0.909276	1.05252	0.427273	0.319089	0.424316	0.657799	0.0928346	0.932377	0.704544	2.57786	0.698566	36.7439	1289.21	0.913227	1.18216	0.932377	0.436356	0.224404	0.50823	7.73e-07	5	4006	c
1207	711	100	14.7906	2.67473	9.55955	20.0181	103.786	298.429	37.9535	0.720216	-0.223857	0.0439024	1.11527	0.859587	4.97139	0.669875	33.0606	1031.81	1.16951	1.48477	1.11527	0.459825	0.331174	0.667295	0.0305234	2.74478	0.643163	4.84599	0.514156	32.8957	1021.24	1.13719	1.63118	2.74478	0.610841	0.147362	0.478076	8.09e-07	3	918	c
1208	749	123	15.5601	3.72908	8.66731	23.2442	27.2598	377.134	40.7788	0.710631	0.47704	0.0489721	1.15341	0.850083	4.8468	0.68188	33.2538	1044.97	1.14861	1.46	1.15341	0.468092	0.32727	0.659704	0.0360499	2.85407	0.620523	4.76053	0.546813	33.1275	1037.35	1.10934	1.57653	2.85407	0.60943	0.153818	0.480654	7.11e-07	7	5362	c
1209	599	80	13.4198	1.87498	9.16826	16.4608	211.357	339.632	32.6513	0.637901	-0.387012	0.167918	0.46965	0.804314	2.20001	0.809304	25.689	621.47	0.846664	1.00176	0.46965	0.334651	0.373368	0.607156	0.155711	0.895636	0.576332	2.057	0.727246	25.5825	617.358	0.803006	1.05474	0.895636	0.434016	0.177032	0.430389	8.4e-07	4	4006	c
1210	529	90	13.2703	4.4502	6.34949	21.2745	251.502	345.33	42.6995	0.910588	-0.0529907	0.0861592	0.611026	0.818001	2.67865	0.766769	26.4191	653.206	0.980887	1.19041	0.611026	0.373136	0.346413	0.626673	0.0614662	1.322	0.585234	2.59366	0.642804	26.2063	643.1	0.946751	1.29876	1.322	0.483208	0.148027	0.432993	8.42e-07	4	1167	c
1211	716	105	15.3691	4.78117	5.22962	23.7606	129.626	358.1	46.7767	0.870906	-0.121015	0.0533507	0.786513	0.883162	4.36581	0.715387	35.5153	1196.18	1.11325	1.36857	0.786513	0.405802	0.372241	0.682086	0.0382705	1.87582	0.727093	4.43673	0.58146	35.2647	1178.77	1.10485	1.52805	1.87582	0.54743	0.199067	0.535413	9.28e-07	2	1081	c
1212	558	88	13.5674	3.59181	6.0979	20.299	277.429	373.789	37.2496	0.764374	-0.149075	0.0487782	1.51732	0.867464	6.72422	0.642306	30.8715	902.249	1.19206	1.53015	1.51732	0.517732	0.338682	0.681278	0.0346232	4.52749	0.619526	6.94981	0.485667	30.6823	890.023	1.17379	1.65614	4.52749	0.701076	0.165971	0.508914	9e-07	3	649	c
1213	622	97	13.747	2.55272	9.12895	18.2222	171.828	378.708	34.8161	0.677276	1.49966	0.0522415	0.742019	0.894659	4.52199	0.717515	35.2476	1176.07	1.1489	1.39556	0.742019	0.391972	0.396042	0.705696	0.0335886	1.95247	0.724111	4.5385	0.548398	35.0932	1165.59	1.13161	1.57518	1.95247	0.543161	0.195577	0.537836	9.47e-07	2	840	c
1214	684	102	15.9697	5.37763	5.94	25.4271	207.482	438.456	50.2604	0.915613	0.600113	0.0579732	1.51604	0.85186	6.11691	0.648867	31.1381	917.322	1.16529	1.50207	1.51604	0.517604	0.313419	0.654063	0.0478555	3.73266	0.620559	5.91862	0.520285	30.819	897.928	1.12071	1.62189	3.73266	0.667935	0.137222	0.46103	1e-06	6	3135	c
1215	538	74	13.1087	1.13414	10.4383	15.7818	234.672	472.961	29.7461	0.489668	0.0701887	0.110484	0.527919	0.757226	2.08727	0.776244	30.2345	865.445	0.881088	1.06295	0.527919	0.347447	0.2991	0.558489	0.0743871	1.17131	0.496228	2.16254	0.643041	30.2377	865.737	0.873449	1.21079	1.17131	0.462717	0.103164	0.351283	1.01e-06	6	3135	c
1216	409	85	12.4022	4.93168	4.15639	20.2692	163.138	464.955	44.3841	0.952028	-0.333473	0.0375869	1.45259	0.814707	4.91971	0.620048	33.9045	1086.29	1.16213	1.52634	1.45259	0.504296	0.291388	0.637056	0.0308331	3.89645	0.52801	5.12768	0.455177	33.7485	1076.58	1.13004	1.61946	3.89645	0.671195	0.122046	0.435678	1.09e-06	7	1621	c
1217	534	80	12.8271	2.26725	7.95213	17.5196	158.972	516.089	32.897	0.735308	1.11033	0.0378433	1.59589	0.800187	4.99348	0.626025	32.0325	966.089	1.18274	1.5692	1.59589	0.521602	0.273471	0.625866	0.0285047	3.45312	0.503033	4.4742	0.487711	31.6719	944.369	1.11168	1.65687	3.45312	0.649659	0.112532	0.423409	1.13e-06	2	757	c
1218	781	101	16.3751	4.66242	8.34756	24.3666	344.884	17.0196	49.38	0.900734	-0.533631	0.0721766	0.75594	0.865276	3.80552	0.737616	32.4796	996.347	1.08089	1.31599	0.75594	0.403583	0.376849	0.676188	0.0522449	1.82714	0.662073	3.70346	0.601009	32.3214	985.975	1.06461	1.45586	1.82714	0.545814	0.179551	0.499626	2.27e-07	3	18658	c
1219	702	88	15.1102	3.52084	9.38756	21.1851	426.325	38.9438	43.3279	0.854779	-1.02067	0.0739213	1.1234	0.868248	5.26328	0.699239	28.7204	777.447	1.12477	1.38609	1.1234	0.469116	0.380532	0.691866	0.0547352	2.94118	0.651624	5.22126	0.571067	28.5851	768.893	1.10872	1.51243	2.94118	0.627663	0.194351	0.527155	3.92e-07	2	18658	c
1220	503	84	12.9517	3.47639	6.18372	19.6044	497.323	58.7859	37.8707	0.875956	-0.664854	0.0999332	0.559677	0.839915	2.74807	0.784032	26.2414	645.581	0.960018	1.14972	0.559677	0.36015	0.381984	0.647235	0.0814402	1.05189	0.686365	2.67693	0.691648	26.1368	640.153	0.947568	1.2353	1.05189	0.458193	0.208224	0.499571	5.5e-07	3	18658	c
1221	433	70	11.3217	1.6123	8.58933	14.241	545.468	35.1536	28.4234	0.700103	-0.0706779	0.108997	0.481068	0.804985	2.23341	0.79671	28.3644	758.727	0.900312	1.06212	0.481068	0.337002	0.356665	0.60776	0.0759175	1.15718	0.551083	2.28886	0.665312	28.2737	753.735	0.892394	1.20069	1.15718	0.469717	0.141491	0.408757	5.08e-07	4	18658	c
1222	779	102	15.7184	2.72339	10.2098	22.2456	646.688	132.416	37.077	0.501451	1.54679	0.0503837	0.930296	0.906172	5.95744	0.72283	30.6379	885.622	1.19773	1.46476	0.930296	0.434685	0.409307	0.727617	0.0348605	2.32656	0.742995	5.52629	0.572248	30.2627	862.246	1.16859	1.60952	2.32656	0.580476	0.208976	0.559571	8.73e-07	5	18658	c
1223	446	75	11.8639	2.62981	7.92879	17.4107	382.123	176.932	31.5872	0.761508	1.19519	0.117213	0.574029	0.755525	2.174	0.784345	25.2925	599.741	0.887175	1.07799	0.574029	0.364553	0.312682	0.573904	0.0933934	1.09211	0.485494	2.06131	0.684102	25.1974	595.923	0.850501	1.1509	1.09211	0.453389	0.129002	0.383082	7.62e-07	5	1618	c
1224	639	102	14.0641	2.96924	6.64149	19.3844	470.905	176.675	34.7634	0.587135	-0.356439	0.0950645	0.469864	0.850964	2.57634	0.788497	28.0887	742.005	0.95626	1.1142	0.469864	0.328116	0.390414	0.646181	0.0633459	1.09156	0.665247	2.6304	0.645454	28.079	741.156	0.954719	1.2719	1.09156	0.442461	0.185362	0.478361	9.03e-07	5	4717	c
[truncated: 1,644 more rows]
