# Supplementary material for: Characteristics of auto-quantified tumor-infiltrating lymphocytes and the prognostic value in adenocarcinoma of the esophagogastric junction, gastric adenocarcinoma, and esophageal squamous cell carcinoma
Source: publisher site journal article supplement (doi:10.18632/aging.205999), 2024-07-05
Supplement: Supplementary file [file aging-v16i13-205999-supplementary-material-SD2.pdf]

## SUPPLEMENTARY TABLES

**Supplementary Table 1. Classification accuracy by 2-fold cross-validation for cancer cells, lymphocytes, and stromal cells based on the AEGJ, GAC, and ESCC training and testing sets.**

| Classes       | SVM Prediction (Training set) |            |         |            | SVM Prediction (Testing set) |            |         |            |
|---------------|-------------------------------|------------|---------|------------|------------------------------|------------|---------|------------|
|               | Cancer                        | Lymphocyte | Stromal | Recall (%) | Cancer                       | Lymphocyte | Stromal | Recall (%) |
| <b>AEGJ</b>   |                               |            |         |            |                              |            |         |            |
| Cancer        | 426                           | 28         | 34      | 87.30      | 463                          | 14         | 35      | 90.43      |
| Lymphocyte    | 23                            | 425        | 7       | 93.41      | 18                           | 408        | 3       | 95.78      |
| Stromal       | 58                            | 4          | 187     | 75.10      | 38                           | 4          | 209     | 83.27      |
| Precision (%) | 84.02                         | 93.00      | 82.02   |            | 89.21                        | 95.77      | 84.62   |            |
| <b>GAC</b>    |                               |            |         |            |                              |            |         |            |
| Cancer        | 530                           | 1          | 4       | 99.07      | 523                          | 3          | 5       | 98.40      |
| Lymphocyte    | 9                             | 748        | 1       | 98.68      | 4                            | 729        | 0       | 99.45      |
| Stromal       | 12                            | 0          | 189     | 94.03      | 10                           | 0          | 220     | 95.65      |
| Precision (%) | 96.19                         | 99.87      | 97.42   |            | 97.39                        | 99.59      | 97.78   |            |
| <b>ESCC</b>   |                               |            |         |            |                              |            |         |            |
| Cancer        | 410                           | 4          | 98      | 80.08      | 438                          | 4          | 91      | 82.18      |
| Lymphocyte    | 3                             | 166        | 48      | 76.50      | 4                            | 167        | 34      | 81.46      |
| Stromal       | 11                            | 7          | 594     | 97.06      | 19                           | 15         | 569     | 94.36      |
| Precision (%) | 96.70                         | 93.79      | 80.27   |            | 95.01                        | 89.78      | 81.99   |            |

The confusion matrix of the real classes of the cells (columns) and the predicted classes (rows) are shown, where Precision was calculated by true positives/(true positives + false positives) and Recall was calculated by true positives/(true positives + false negatives).

**Supplementary Table 2. The comparison of TILs proportion in the 214 AEGJ, 256 GAC, and 752 ESCC cases.**

| Variables                            | TILs proportion, Median (IQR) |                    |                   | P-value |
|--------------------------------------|-------------------------------|--------------------|-------------------|---------|
|                                      | AEGJ (%)                      | GAC (%)            | ESCC (%)          |         |
| <b>All patients</b>                  | 4.82 (1.90, 11.18)            | 1.92 (0.44, 8.66)  | 0.12 (0.02, 0.75) | <0.001  |
| <b>Age</b>                           |                               |                    |                   |         |
| <60                                  | 3.82 (1.57, 11.05)            | 1.86 (0.16, 9.16)  | 0.15 (0.03, 0.92) | <0.001  |
| ≥60                                  | 4.88 (2.01, 11.21)            | 1.93 (0.47, 8.16)  | 0.12 (0.02, 0.73) | <0.001  |
| <b>Sex</b>                           |                               |                    |                   |         |
| Man                                  | 4.55 (1.71, 10.80)            | 2.38 (0.52, 9.14)  | 0.12 (0.02, 0.67) | <0.001  |
| Woman                                | 5.19 (2.41, 12.45)            | 1.27 (0.30, 6.54)  | 0.13 (0.02, 1.10) | <0.001  |
| <b>BMI</b>                           |                               |                    |                   |         |
| <18.5                                | 5.02 (1.32, 8.99)             | 1.83 (0.33, 6.88)  | 0.08 (0.02, 0.56) | <0.001  |
| 18.5-24                              | 4.56 (1.99, 11.21)            | 2.34 (0.51, 8.08)  | 0.11 (0.02, 0.62) | <0.001  |
| ≥24                                  | 4.97 (2.09, 10.82)            | 1.86 (0.43, 9.15)  | 0.23 (0.02, 1.20) | <0.001  |
| <b>Tea drinking</b>                  |                               |                    |                   |         |
| Never                                | 4.65 (1.56, 11.01)            | 1.51 (0.29, 7.93)  | 0.12 (0.02, 0.72) | <0.001  |
| Ever                                 | 5.36 (3.02, 11.11)            | 2.74 (1.14, 10.47) | 0.12 (0.02, 0.75) | <0.001  |
| <b>Times of tooth brushing daily</b> |                               |                    |                   |         |
| <2                                   | 4.94 (2.03, 11.21)            | 2.18 (0.46, 9.09)  | 0.12 (0.02, 0.75) | <0.001  |
| ≥2                                   | 3.98 (1.29, 6.62)             | 1.79 (0.33, 8.08)  | 0.12 (0.02, 0.75) | <0.001  |

|                                    |                    |                    |                   |                |  |
|------------------------------------|--------------------|--------------------|-------------------|----------------|--|
| <b>Wealth scores</b>               |                    |                    |                   |                |  |
| Q1                                 | 4.99 (2.47, 11.56) | 2.13 (0.37, 8.91)  | 0.12 (0.02, 0.69) | < <b>0.001</b> |  |
| Q2                                 | 2.94 (1.36, 5.60)  | 1.27 (0.36, 4.56)  | 0.13 (0.02, 0.96) | < <b>0.001</b> |  |
| Q3                                 | 5.22 (2.24, 13.93) | 2.55 (0.38, 2.55)  | 0.09 (0.01, 0.45) | < <b>0.001</b> |  |
| Q4                                 | 4.26 (1.23, 10.69) | 2.38 (0.67, 2.38)  | 0.13 (0.02, 0.51) | < <b>0.001</b> |  |
| Q5                                 | 5.71 (3.41, 13.55) | 2.41 (0.93, 4.74)  | 0.25 (0.03, 2.05) | < <b>0.001</b> |  |
| <b><i>Helicobacter pylori</i></b>  |                    |                    |                   |                |  |
| HP+                                | 4.62 (1.84, 11.24) | 2.28 (0.45, 9.66)  | 0.13 (0.02, 0.77) | < <b>0.001</b> |  |
| HP-                                | 5.24 (2.99, 11.10) | 1.83 (0.39, 6.87)  | 0.12 (0.02, 0.60) | < <b>0.001</b> |  |
| <b>Gastric atrophy</b>             |                    |                    |                   |                |  |
| Yes                                | 4.62 (1.84, 11.24) | 2.28 (0.45, 9.66)  | 0.13 (0.02, 0.77) | < <b>0.001</b> |  |
| No                                 | 5.24 (2.99, 11.10) | 1.83 (0.39, 6.87)  | 0.12 (0.02, 0.60) | < <b>0.001</b> |  |
| <b>First-line treatment method</b> |                    |                    |                   |                |  |
| Radiotherapy                       | 2.77 (0.40, 7.72)  | 0.82 (0.27, 2.74)  | 0.09 (0.02, 0.68) | < <b>0.001</b> |  |
| Chemotherapy                       | 4.10 (1.56, 5.30)  | 1.32 (0.30, 13.71) | 0.10 (0.02, 0.48) | < <b>0.001</b> |  |
| Surgery                            | 5.72 (3.14, 11.94) | 2.78 (0.73, 11.12) | 0.15 (0.03, 0.80) | < <b>0.001</b> |  |
| Combination therapy                | 4.64 (1.81, 10.42) | 1.32 (0.35, 3.21)  | 0.10 (0.02, 0.92) | < <b>0.001</b> |  |
| Untreated                          | 1.83 (1.05, 3.49)  | 0.66 (0.18, 1.61)  | 0.03 (0.02, 0.43) | <b>0.002</b>   |  |
| <b>TNM staging</b>                 |                    |                    |                   |                |  |
| 0+I+II                             | 6.92 (3.12, 13.39) | 2.64 (0.49, 10.91) | 0.14 (0.02, 0.76) | < <b>0.001</b> |  |
| III+IV                             | 5.34 (2.99, 11.56) | 2.47 (0.74, 11.12) | 0.15 (0.02, 0.92) | < <b>0.001</b> |  |
| <b>Grade of differentiation</b>    |                    |                    |                   |                |  |
| Gx Grading cannot be evaluated     | 4.04 (1.77, 12.42) | 2.38 (0.82, 10.20) | 0.16 (0.02, 1.30) | < <b>0.001</b> |  |
| G1 Highly differentiated           | 8.67 (2.55, 14.28) | 1.60 (0.68, 10.19) | 0.13 (0.03, 0.69) | <b>0.008</b>   |  |
| G2 Medium differentiation          | 7.72 (3.89, 13.39) | 2.78 (1.13, 9.15)  | 0.13 (0.02, 0.84) | < <b>0.001</b> |  |
| G3 Poorly differentiated           | 7.17 (1.97, 12.81) | 2.10 (0.26, 11.47) | 0.11 (0.02, 0.56) | < <b>0.001</b> |  |
| G4 Undifferentiated                | 4.34 (2.42, 5.17)  | 0.85 (0.35, 3.50)  | 0.13 (0.05, 0.35) | < <b>0.001</b> |  |

**Supplementary Table 3. Univariable and multivariable Cox regression analyses of basic characteristics with OS in GAC of Taixing dataset (Discovery, N = 256).**

| Characteristics             | No. of patients (%) | Median survival (years) | Univariable analysis |                      | Multivariable analysis |                           |
|-----------------------------|---------------------|-------------------------|----------------------|----------------------|------------------------|---------------------------|
|                             |                     |                         | P-value              | HR (95% CI)          | P-value                | aHR <sup>a</sup> (95% CI) |
| <b>TILs, Median (IQR)</b>   | 1.92 (0.44, 8.66)   |                         | <b>0.030</b>         | 0.979 (0.961, 0.998) | <b>0.016</b>           | 0.972 (0.949, 0.995)      |
| <b>Age, mean (range)</b>    | 67.52 (41–85)       |                         | <b>0.023</b>         | 1.022 (1.003, 1.041) | <b>0.919</b>           | 1.001 (0.977, 1.026)      |
| <b>Sex</b>                  |                     |                         |                      |                      |                        |                           |
| Woman                       | 67 (26.17)          | 2.16                    |                      | Ref.                 |                        | Ref.                      |
| Man                         | 189 (73.83)         | 2.65                    | 0.061                | 0.711 (0.500, 1.016) | 0.574                  | 0.854 (0.493, 1.479)      |
| <b>Marriage</b>             |                     |                         |                      |                      |                        |                           |
| Divorce/widow               | 61 (23.83)          | 2.56                    |                      | Ref.                 |                        | Ref.                      |
| Unmarried                   | 9 (3.52)            | 0.98                    | 0.103                | 1.955 (0.874, 4.375) | 0.390                  | 1.790 (0.475, 6.746)      |
| Married                     | 186 (72.66)         | 2.71                    | 0.108                | 0.740 (0.512, 1.068) | 0.665                  | 1.135 (0.640, 2.011)      |
| <b>Educational level</b>    |                     |                         |                      |                      |                        |                           |
| High school and above       | 18 (7.03)           | 3.47                    |                      | Ref.                 |                        | Ref.                      |
| Primary or Secondary school | 158 (61.72)         | 2.64                    | 0.095                | 2.038 (0.883, 4.705) | <b>0.027</b>           | 3.871 (1.163, 12.881)     |
| Illiteracy                  | 80 (31.25)          | 2.16                    | <b>0.027</b>         | 2.602 (1.113, 6.079) | 0.077                  | 3.272 (0.881, 12.148)     |

|                                    |             |      |                  |                       |                  |  |                       |
|------------------------------------|-------------|------|------------------|-----------------------|------------------|--|-----------------------|
| <b>Cigarette smoking</b>           |             |      |                  |                       |                  |  |                       |
| Never                              | 103 (40.23) | 2.16 |                  | Ref.                  |                  |  | Ref.                  |
| Ever or still                      | 144 (56.25) | 2.73 | 0.077            | 0.737 (0.525, 1.034)  | 0.497            |  | 0.776 (0.373, 1.614)  |
| Missing                            | 9 (3.52)    |      |                  |                       |                  |  |                       |
| <b>Alcohol drinking</b>            |             |      |                  |                       |                  |  |                       |
| Never                              | 125 (48.83) | 2.64 |                  | Ref.                  |                  |  | Ref.                  |
| Ever or still                      | 122 (47.66) | 2.62 | 0.536            | 0.899 (0.642, 1.259)  | 0.552            |  | 1.189 (0.673, 2.101)  |
| Missing                            | 9 (3.52)    |      |                  |                       |                  |  |                       |
| <b>Tea drinking</b>                |             |      |                  |                       |                  |  |                       |
| Never                              | 170 (66.41) | 2.64 |                  | Ref.                  |                  |  | Ref.                  |
| Ever                               | 77 (30.08)  | 2.48 | 0.856            | 0.967 (0.672, 1.391)  | 0.070            |  | 1.671 (0.960, 2.909)  |
| Missing                            | 9 (3.52)    |      |                  |                       |                  |  |                       |
| <b>BMI</b>                         |             |      |                  |                       |                  |  |                       |
| ≥24                                | 66 (25.78)  | 3.01 |                  | Ref.                  |                  |  | Ref.                  |
| 18.5–24                            | 158 (61.72) | 2.55 | 0.434            | 1.176 (0.783, 1.766)  | 0.489            |  | 1.230 (0.684, 2.211)  |
| <18.5                              | 32 (12.50)  | 2.25 | 0.107            | 1.564 (0.908, 2.695)  | 0.103            |  | 1.938 (0.875, 4.294)  |
| Missing                            | 0 (0.00)    |      |                  |                       |                  |  |                       |
| <b>Wealth scores</b>               |             |      |                  |                       |                  |  |                       |
| Q5                                 | 40 (15.63)  | 2.64 |                  | Ref.                  |                  |  | Ref.                  |
| Q4                                 | 47 (18.36)  | 2.68 | 0.448            | 0.792 (0.434, 1.447)  | 0.903            |  | 1.056 (0.438, 2.548)  |
| Q3                                 | 62 (24.42)  | 3.14 | 0.453            | 0.810 (0.468, 1.403)  | 0.850            |  | 1.081 (0.484, 2.415)  |
| Q2                                 | 55 (21.48)  | 1.99 | 0.508            | 1.202 (0.697, 2.070)  | 0.532            |  | 1.296 (0.574, 2.926)  |
| Q1                                 | 52 (20.31)  | 2.40 | 0.321            | 1.309 (0.769, 2.227)  | 0.990            |  | 1.005 (0.461, 2.188)  |
| <b>First-line treatment method</b> |             |      |                  |                       |                  |  |                       |
| Untreated                          | 11 (4.30)   | 0.81 |                  | Ref.                  |                  |  | Ref.                  |
| Combination therapy                | 57 (22.27)  | 2.32 | <b>0.003</b>     | 0.344 (0.169, 0.698)  | <b>0.007</b>     |  | 0.175 (0.049, 0.620)  |
| Surgery                            | 151 (58.98) | 3.00 | <b>&lt;0.001</b> | 0.193 (0.098, 0.380)  | <b>&lt;0.001</b> |  | 0.140 (0.043, 0.451)  |
| Chemotherapy                       | 27 (10.55)  | 0.86 | 0.658            | 0.844 (0.399, 1.786)  | 0.241            |  | 0.472 (0.135, 1.656)  |
| Radiotherapy                       | 9 (3.52)    | 1.21 | 0.413            | 0.681 (0.271, 1.709)  | 0.778            |  | 0.817 (0.202, 3.314)  |
| Missing                            | 1 (0.39)    |      |                  |                       |                  |  |                       |
| <b>Grade of differentiation</b>    |             |      |                  |                       |                  |  |                       |
| G1 Highly differentiated           | 7 (2.73)    | 3.59 |                  | Ref.                  |                  |  | Ref.                  |
| G2 Medium differentiation          | 63 (24.61)  | 3.14 | 0.762            | 0.795 (0.181, 3.503)  | 0.799            |  | 0.822 (0.183, 3.694)  |
| G3 Poorly differentiated           | 48 (18.75)  | 2.40 | 0.162            | 2.786 (0.663, 11.711) | 0.162            |  | 2.835 (0.657, 12.237) |
| G4 Undifferentiated                | 9 (3.52)    | 3.48 | 0.320            | 2.300 (0.446, 11.868) | 0.435            |  | 1.979 (0.357, 10.977) |
| Gx Grading cannot be evaluated     | 47 (18.36)  | 1.99 | 0.071            | 3.733 (0.893, 15.603) | 0.242            |  | 2.467 (0.543, 11.209) |
| Missing                            | 82 (32.03)  |      |                  |                       |                  |  |                       |
| <b>Helicobacter pylori</b>         |             |      |                  |                       |                  |  |                       |
| HP–                                | 68 (26.56)  | 2.27 |                  | Ref.                  |                  |  | Ref.                  |
| HP+                                | 181 (70.70) | 2.65 | 0.138            | 0.761 (0.531, 1.092)  | 0.543            |  | 0.836 (0.470, 1.488)  |
| Missing                            | 7 (2.73)    |      |                  |                       |                  |  |                       |
| <b>Gastric atrophy</b>             |             |      |                  |                       |                  |  |                       |
| No                                 | 157 (61.33) | 2.71 |                  | Ref.                  |                  |  | Ref.                  |
| Yes                                | 51 (19.92)  | 2.10 | <b>0.017</b>     | 1.623(1.091, 2.414)   | <b>0.006</b>     |  | 2.183 (1.246, 3.826)  |
| Missing                            | 48 (18.75)  |      |                  |                       |                  |  |                       |

<sup>a</sup>aHR with adjustment for TILs, age, sex, grade of differentiation, first-line treatment method, BMI.

**Supplementary Table 4. Univariable and multivariable Cox regression analyses of basic characteristics with OS in ESCC of Taixing dataset (Discovery,  $N = 752$ ).**

| Characteristics                    | No. of patients (%) | Median survival (years) | Univariable analysis |                      | Multivariable analysis |                           |
|------------------------------------|---------------------|-------------------------|----------------------|----------------------|------------------------|---------------------------|
|                                    |                     |                         | <i>P</i> -value      | HR (95% CI)          | <i>P</i> -value        | aHR <sup>a</sup> (95% CI) |
| <b>TILs, Median (IQR)</b>          | 0.12 (0.02, 0.75)   |                         | <b>0.008</b>         | 0.960 (0.931, 0.990) | <b>0.032</b>           | 0.967 (0.938, 0.997)      |
| <b>Age, mean (range)</b>           | 66.96 (42–85)       |                         | <b>&lt;0.001</b>     | 1.033 (1.021, 1.045) | <b>&lt;0.001</b>       | 1.022 (1.010, 1.035)      |
| <b>Sex</b>                         |                     |                         |                      |                      |                        |                           |
| Woman                              | 260 (34.57)         | 2.62                    |                      | Ref.                 |                        | Ref.                      |
| Man                                | 492 (65.43)         | 2.35                    | <b>0.107</b>         | 1.180 (0.965, 1.444) | <b>0.020</b>           | 1.289 (1.040, 1.599)      |
| <b>Marriage</b>                    |                     |                         |                      |                      |                        |                           |
| Divorce/widow                      | 136 (18.09)         | 2.54                    |                      | Ref.                 |                        | Ref.                      |
| Unmarried                          | 25 (3.32)           | 1.31                    | <b>0.003</b>         | 2.105 (1.286, 3.445) | <b>0.037</b>           | 1.798 (1.036, 3.121)      |
| Married                            | 591 (78.59)         | 2.46                    | 0.938                | 0.990 (0.773, 1.269) | 0.346                  | 1.137 (0.870, 1.486)      |
| <b>Educational level</b>           |                     |                         |                      |                      |                        |                           |
| High school and above              | 47 (6.25)           | 2.43                    |                      | Ref.                 |                        | Ref.                      |
| Primary or Secondary school        | 429 (57.05)         | 2.61                    | 0.796                | 1.057 (0.694, 1.609) | 0.880                  | 1.034 (0.669, 1.598)      |
| Illiteracy                         | 276 (36.70)         | 2.06                    | 0.135                | 1.385 (0.903, 2.122) | 0.190                  | 1.374 (0.854, 2.210)      |
| <b>Cigarette smoking</b>           |                     |                         |                      |                      |                        |                           |
| Never                              | 313 (41.62)         | 2.59                    |                      | Ref.                 |                        | Ref.                      |
| Ever or still                      | 405 (53.86)         | 2.40                    | 0.600                | 1.053 (0.867, 1.280) | 0.423                  | 0.884 (0.653, 1.120)      |
| Missing                            | 34 (4.52)           |                         |                      |                      |                        |                           |
| <b>Alcohol drinking</b>            |                     |                         |                      |                      |                        |                           |
| Never                              | 351 (46.68)         | 2.43                    |                      | Ref.                 |                        | Ref.                      |
| Ever or still                      | 366 (48.67)         | 2.45                    | 0.523                | 0.939 (0.775, 1.139) | 0.208                  | 0.849 (0.658, 1.096)      |
| Missing                            | 35 (4.65)           |                         |                      |                      |                        |                           |
| <b>Tea drinking</b>                |                     |                         |                      |                      |                        |                           |
| Never                              | 493 (65.56)         | 2.51                    |                      | Ref.                 |                        | Ref.                      |
| Ever                               | 225 (29.92)         | 2.33                    | 0.483                | 1.076 (0.876, 1.322) | 0.181                  | 1.180 (0.926, 1.504)      |
| Missing                            | 34 (4.52)           |                         |                      |                      |                        |                           |
| <b>BMI</b>                         |                     |                         |                      |                      |                        |                           |
| ≥24                                | 201 (26.73)         | 2.77                    |                      | Ref.                 |                        | Ref.                      |
| 18.5-24                            | 466 (61.97)         | 2.22                    | <b>0.007</b>         | 1.377 (1.093, 1.735) | 0.058                  | 1.259 (0.993, 1.598)      |
| <18.5                              | 85 (11.30)          | 1.75                    | <b>0.001</b>         | 1.771 (1.281, 2.449) | 0.063                  | 1.378 (0.983, 1.932)      |
| Missing                            | 0 (0.00)            |                         |                      |                      |                        |                           |
| <b>Wealth scores</b>               |                     |                         |                      |                      |                        |                           |
| Q5                                 | 62 (8.24)           | 2.67                    |                      | Ref.                 |                        | Ref.                      |
| Q4                                 | 138 (18.35)         | 2.63                    | 0.232                | 1.262 (0.862, 1.848) | 0.287                  | 1.235 (0.837, 1.822)      |
| Q3                                 | 161 (21.41)         | 2.49                    | 0.240                | 1.253 (0.860, 1.826) | 0.580                  | 1.114 (0.760, 1.635)      |
| Q2                                 | 139 (18.48)         | 2.31                    | 0.158                | 1.318 (0.898, 1.935) | 0.112                  | 1.373 (0.928, 2.029)      |
| Q1                                 | 232 (30.85)         | 2.18                    | <b>0.030</b>         | 1.480 (1.039, 2.109) | 0.254                  | 1.235 (0.859, 1.776)      |
| <b>First-line treatment method</b> |                     |                         |                      |                      |                        |                           |
| Untreated                          | 21 (2.79)           | 0.89                    |                      | Ref.                 |                        | Ref.                      |
| Radiotherapy                       | 88 (11.70)          | 1.68                    | <b>&lt;0.001</b>     | 0.328 (0.199, 0.540) | <b>0.001</b>           | 0.391 (0.224, 0.683)      |
| Chemotherapy                       | 93 (12.37)          | 1.49                    | <b>&lt;0.001</b>     | 0.368 (0.225, 0.602) | <b>0.004</b>           | 0.448 (0.259, 0.775)      |
| Surgery                            | 377 (50.13)         | 2.88                    | <b>&lt;0.001</b>     | 0.166 (0.105, 0.263) | <b>&lt;0.001</b>       | 0.236 (0.140, 0.399)      |
| Combination therapy                | 170 (22.61)         | 1.84                    | <b>&lt;0.001</b>     | 0.291 (0.182, 0.466) | <b>0.001</b>           | 0.400 (0.236, 0.678)      |
| Missing                            | 3 (0.40)            |                         |                      |                      |                        |                           |

|                                   |             |      |              |                      |              |  |                       |
|-----------------------------------|-------------|------|--------------|----------------------|--------------|--|-----------------------|
| <b>Grade of differentiation</b>   |             |      |              |                      |              |  |                       |
| G1 Highly differentiated          | 60 (7.98)   | 2.85 |              | Ref.                 |              |  | Ref.                  |
| G2 Medium differentiation         | 452 (60.11) | 2.61 | 0.091        | 1.426 (0.945, 2.152) | 0.142        |  | 1.366 (0.9005, 2.073) |
| G3 Poorly differentiated          | 134 (17.82) | 2.05 | <b>0.003</b> | 1.966 (1.260, 3.069) | 0.101        |  | 1.463 (0.929, 2.303)  |
| G4 Undifferentiated               | 45 (5.98)   | 1.51 | <b>0.003</b> | 2.215 (1.302, 3.770) | 0.087        |  | 1.607 (0.933, 2.768)  |
| Gx Grading cannot be evaluated    | 40 (5.32)   | 1.68 | <b>0.003</b> | 2.250 (1.317, 3.845) | <b>0.031</b> |  | 1.814 (1.055, 3.117)  |
| Missing                           | 21 (2.79)   |      |              |                      |              |  |                       |
| <b><i>Helicobacter pylori</i></b> |             |      |              |                      |              |  |                       |
| HP-                               | 234 (31.12) | 2.45 |              | Ref.                 |              |  | Ref.                  |
| HP+                               | 484 (64.36) | 2.38 | 0.271        | 1.124 (0.913, 1.383) | 0.355        |  | 1.108 (0.892, 1.376)  |
| Missing                           | 34 (4.52)   |      |              |                      |              |  |                       |
| <b>Gastric atrophy</b>            |             |      |              |                      |              |  |                       |
| No                                | 520 (69.15) | 2.47 |              | Ref.                 |              |  | Ref.                  |
| Yes                               | 98 (13.03)  | 2.31 | 0.635        | 1.070 (0.808, 1.418) | 0.468        |  | 1.114 (0.832, 1.490)  |
| Missing                           | 134 (17.82) |      |              |                      |              |  |                       |

<sup>a</sup>aHR with adjustment for TILs, age, sex, grade of differentiation, first-line treatment method, BMI.

**Supplementary Table 5. Univariable and multivariable Cox regression analyses of basic characteristics with OS in AEGJ of Taixing dataset (Discovery, *N* = 117).**

| Characteristics             | No. of patients (%) | Median survival (years) | Univariable analysis |                      | Multivariable analysis |                           |  |
|-----------------------------|---------------------|-------------------------|----------------------|----------------------|------------------------|---------------------------|--|
|                             |                     |                         | <i>P</i> -value      | HR (95% CI)          | <i>P</i> -value        | aHR <sup>a</sup> (95% CI) |  |
| <b>TILs, Median (IQR)</b>   | 5.42 (3.04, 12.86)  |                         | <b>0.009</b>         | 0.957 (0.926, 0.989) | <b>0.009</b>           | 0.946 (0.907, 0.986)      |  |
| <b>Age, mean (range)</b>    | 69 (49–84)          |                         | 0.546                | 1.010 (0.978, 1.044) | 0.553                  | 1.012 (0.973, 1.053)      |  |
| <b>Sex</b>                  |                     |                         |                      |                      |                        |                           |  |
| Woman                       | 35 (29.91)          | 2.56                    |                      | Ref.                 |                        | Ref.                      |  |
| Man                         | 82 (70.09)          | 2.82                    | 0.628                | 0.874 (0.507, 1.506) | 0.605                  | 0.849 (0.458, 1.577)      |  |
| <b>Marriage</b>             |                     |                         |                      |                      |                        |                           |  |
| Divorce/widow               | 28 (23.93)          | 3.05                    |                      | Ref.                 |                        | Ref.                      |  |
| Unmarried                   | 9 (7.69)            | 2.56                    | 0.579                | 0.703 (0.202, 2.448) | 0.073                  | 0.149 (0.019, 1.194)      |  |
| Married                     | 80 (68.38)          | 2.71                    | 0.600                | 1.175 (0.643, 2.147) | 0.712                  | 0.857 (0.379, 1.938)      |  |
| <b>Educational level</b>    |                     |                         |                      |                      |                        |                           |  |
| High school and above       | 6 (5.13)            | 2.59                    |                      | Ref.                 |                        | Ref.                      |  |
| Primary or Secondary school | 66 (56.41)          | 2.83                    | 0.285                | 0.597 (0.232, 1.537) | 0.407                  | 0.637 (0.219, 1.851)      |  |
| Illiteracy                  | 45 (38.46)          | 2.70                    | 0.520                | 0.729 (0.278, 1.909) | 0.608                  | 0.720 (0.205, 2.524)      |  |
| <b>Cigarette smoking</b>    |                     |                         |                      |                      |                        |                           |  |
| Never                       | 45 (38.46)          | 3.26                    |                      | Ref.                 |                        | Ref.                      |  |
| Ever or still               | 70 (59.83)          | 2.53                    | 0.331                | 1.298 (0.767, 2.198) | 0.322                  | 1.364 (0.738, 2.522)      |  |
| Missing                     | 2 (1.71)            |                         |                      |                      |                        |                           |  |
| <b>Alcohol drinking</b>     |                     |                         |                      |                      |                        |                           |  |
| Never                       | 70 (59.83)          | 3.11                    |                      | Ref.                 |                        | Ref.                      |  |
| Ever or still               | 45 (38.46)          | 2.53                    | 0.790                | 1.073 (0.637, 1.809) | 0.755                  | 0.912 (0.511, 1.628)      |  |
| Missing                     | 2 (1.71)            |                         |                      |                      |                        |                           |  |
| <b>Tea drinking</b>         |                     |                         |                      |                      |                        |                           |  |
| Never                       | 88 (75.21)          | 2.84                    |                      | Ref.                 |                        | Ref.                      |  |
| Ever                        | 27 (23.08)          | 2.17                    | 0.480                | 1.235 (0.688, 2.218) | 0.822                  | 1.079 (0.555, 2.101)      |  |
| Missing                     | 2 (1.71)            |                         |                      |                      |                        |                           |  |

|                                    |            |      |              |                       |       |                       |  |
|------------------------------------|------------|------|--------------|-----------------------|-------|-----------------------|--|
| <b>BMI</b>                         |            |      |              |                       |       |                       |  |
| ≥24                                | 27 (23.08) | 2.93 |              | Ref.                  |       | Ref.                  |  |
| 18.5-24                            | 78 (66.67) | 2.75 | 0.792        | 0.925 (0.519, 1.649)  | 0.434 | 0.841 (0.423, 1.674)  |  |
| <18.5                              | 11 (9.40)  | 2.70 | 0.493        | 0.681 (0.228, 2.040)  | 0.435 | 0.625 (0.193, 2.030)  |  |
| Missing                            | 1 (0.85)   |      |              |                       |       |                       |  |
| <b>Wealth scores</b>               |            |      |              |                       |       |                       |  |
| Q5                                 | 14 (11.97) | 2.98 |              | Ref.                  |       | Ref.                  |  |
| Q4                                 | 24 (20.51) | 2.25 | 0.391        | 1.521 (0.584, 3.963)  | 0.636 | 0.769 (0.260, 2.279)  |  |
| Q3                                 | 24 (20.51) | 2.60 | 0.572        | 1.322 (0.502, 3.481)  | 0.959 | 0.972 (0.327, 2.894)  |  |
| Q2                                 | 22 (18.80) | 3.67 | 0.621        | 1.277 (0.485, 3.365)  | 0.893 | 0.931 (0.328, 2.642)  |  |
| Q1                                 | 33 (28.21) | 2.88 | 0.987        | 1.008 (0.391, 2.600)  | 0.661 | 0.792 (0.279, 2.247)  |  |
| <b>First-line treatment method</b> |            |      |              |                       |       |                       |  |
| Untreated                          | 1 (0.85)   | 1.58 |              | Ref.                  |       | Ref.                  |  |
| Radiotherapy                       | 4 (3.42)   | 1.16 | 0.744        | 0.684 (0.070, 6.676)  | 0.969 | 0.946 (0.059, 15.110) |  |
| Chemotherapy                       | 4 (3.42)   | 2.08 | 0.859        | 0.819 (0.091, 7.400)  | 0.990 | 1.015 (0.108, 9.568)  |  |
| Surgery                            | 82 (70.09) | 2.82 | 0.226        | 0.291 (0.039, 2.150)  | 0.900 | 1.153 (0.125, 10.65)  |  |
| Combination therapy                | 26 (22.22) | 3.03 | 0.102        | 0.176 (0.022, 1.415)  | 0.731 | 0.663 (0.064, 6.916)  |  |
| Missing                            | 0 (0.00)   |      |              |                       |       |                       |  |
| <b>TNM staging</b>                 |            |      |              |                       |       |                       |  |
| 0+I+II                             | 55 (47.01) | 2.94 |              | Ref.                  |       | Ref.                  |  |
| III+IV                             | 62 (52.99) | 2.14 | <b>0.027</b> | 1.795 (1.068, 3.014)  | 0.200 | 1.462 (0.813, 2.611)  |  |
| <b>Grade of differentiation</b>    |            |      |              |                       |       |                       |  |
| G1 Highly differentiated           | 4 (3.42)   | 2.19 |              | Ref.                  |       | Ref.                  |  |
| G2 Medium differentiation          | 61 (52.14) | 3.00 | 0.574        | 0.661 (0.156, 2.797)  | 0.771 | 0.804 (0.184, 3.512)  |  |
| G3 Poorly differentiated           | 26 (22.22) | 2.73 | 0.979        | 0.980 (0.223, 4.319)  | 0.919 | 1.082 (0.234, 4.998)  |  |
| G4 Undifferentiated                | 8 (6.84)   | 0.68 | 0.087        | 3.971 (0.819, 19.250) | 0.100 | 4.242 (0.757, 23.762) |  |
| Gx Grading cannot be evaluated     | 14 (11.97) | 1.70 | 0.378        | 1.971 (0.436, 8.907)  | 0.365 | 2.128 (0.416, 10.891) |  |
| Missing                            | 4 (3.42)   |      |              |                       |       |                       |  |
| <b>Helicobacter pylori</b>         |            |      |              |                       |       |                       |  |
| HP-                                | 19 (16.24) | 2.70 |              | Ref.                  |       | Ref.                  |  |
| HP+                                | 95 (81.20) | 2.80 | 0.987        | 0.994 (0.503, 1.964)  | 0.968 | 0.983 (0.419, 2.251)  |  |
| Missing                            | 3 (2.56)   |      |              |                       |       |                       |  |
| <b>Gastric atrophy</b>             |            |      |              |                       |       |                       |  |
| No                                 | 70 (59.83) | 2.66 |              | Ref.                  |       | Ref.                  |  |
| Yes                                | 29 (24.79) | 2.76 | 0.461        | 1.234 (0.706, 2.159)  | 0.786 | 0.914 (0.475, 1.755)  |  |
| Missing                            | 18 (15.38) |      |              |                       |       |                       |  |

<sup>a</sup>aHR with adjustment for TILs, age, sex, grade of differentiation, TNM staging, first-line treatment method, BMI.

**Supplementary Table 6. Univariable and multivariable Cox regression analyses of basic characteristics with OS in GAC of Taixing dataset (Discovery, N = 148).**

| Characteristics    | No. of patients (%) | Median survival (years) | Univariable analysis |                      | Multivariable analysis |                           |
|--------------------|---------------------|-------------------------|----------------------|----------------------|------------------------|---------------------------|
|                    |                     |                         | P-value              | HR (95% CI)          | P-value                | aHR <sup>a</sup> (95% CI) |
| TILs, Median (IQR) | 2.55 (0.51, 11.06)  |                         | 0.192                | 0.983 (0.958, 1.009) | <b>0.016</b>           | 0.961 (0.931, 0.993)      |
| Age, mean (range)  | 65.22 (44–85)       |                         | 0.853                | 1.003 (0.974, 1.032) | 0.600                  | 0.990 (0.955, 1.027)      |

|                                    |             |      |                  |                      |              |                       |      |
|------------------------------------|-------------|------|------------------|----------------------|--------------|-----------------------|------|
| <b>Sex</b>                         |             |      |                  |                      |              |                       |      |
| Woman                              | 39 (26.35)  | 2.88 |                  | Ref.                 |              |                       | Ref. |
| Man                                | 109 (73.65) | 2.75 | 0.982            | 0.993 (0.568, 1.736) | 0.896        | 0.955 (0.483, 1.891)  |      |
| <b>Marriage</b>                    |             |      |                  |                      |              |                       |      |
| Divorce/widow                      | 31 (20.95)  | 2.88 |                  | Ref.                 |              |                       | Ref. |
| Unmarried                          | 3 (2.03)    | 2.01 | 0.364            | 1.987 (0.452, 8.740) | 0.321        | 0.319 (0.034, 3.046)  |      |
| Married                            | 114 (77.03) | 2.87 | 0.608            | 0.858 (0.478, 1.540) | 0.766        | 1.131 (0.503, 2.546)  |      |
| <b>Educational level</b>           |             |      |                  |                      |              |                       |      |
| High school and above              | 14 (9.46)   | 3.42 |                  | Ref.                 |              |                       | Ref. |
| Primary or Secondary school        | 95 (64.19)  | 2.81 | 0.262            | 1.962 (0.605, 6.362) | <b>0.045</b> | 4.728 (1.032, 21.662) |      |
| Illiteracy                         | 39 (26.35)  | 2.82 | 0.111            | 2.679 (0.798, 9.001) | <b>0.043</b> | 5.534 (1.056, 28.992) |      |
| <b>Cigarette smoking</b>           |             |      |                  |                      |              |                       |      |
| Never                              | 59 (39.86)  | 2.87 |                  | Ref.                 |              |                       | Ref. |
| Ever or still                      | 88 (59.46)  | 2.82 | 0.746            | 0.920 (0.555, 1.524) | 0.101        | 0.496 (0.214, 1.148)  |      |
| Missing                            | 1 (0.68)    |      |                  |                      |              |                       |      |
| <b>Alcohol drinking</b>            |             |      |                  |                      |              |                       |      |
| Never                              | 75 (50.68)  | 2.98 |                  | Ref.                 |              |                       | Ref. |
| Ever or still                      | 72 (48.65)  | 2.64 | 0.492            | 1.191 (0.723, 1.961) | 0.440        | 1.390 (0.602, 3.210)  |      |
| Missing                            | 1 (0.68)    |      |                  |                      |              |                       |      |
| <b>Tea drinking</b>                |             |      |                  |                      |              |                       |      |
| Never                              | 100 (67.57) | 2.91 |                  | Ref.                 |              |                       | Ref. |
| Ever                               | 47 (31.76)  | 2.46 | 0.139            | 1.477 (0.882, 2.473) | 0.299        | 1.475 (0.708, 3.070)  |      |
| Missing                            | 1 (0.68)    |      |                  |                      |              |                       |      |
| <b>BMI</b>                         |             |      |                  |                      |              |                       |      |
| ≥24                                | 43 (29.05)  | 3.14 |                  | Ref.                 |              |                       | Ref. |
| 18.5-24                            | 90 (60.81)  | 2.64 | 0.513            | 1.215 (0.677, 2.181) | 0.188        | 1.678 (0.777, 3.626)  |      |
| <18.5                              | 15 (10.14)  | 2.75 | 0.369            | 1.477 (0.631, 3.454) | 0.135        | 2.193 (0.783, 6.143)  |      |
| Missing                            | 0 (0.00)    |      |                  |                      |              |                       |      |
| <b>Wealth scores</b>               |             |      |                  |                      |              |                       |      |
| Q5                                 | 22 (14.86)  | 2.62 |                  | Ref.                 |              |                       | Ref. |
| Q4                                 | 30 (20.27)  | 2.97 | 0.479            | 0.733 (0.311, 1.731) | 0.648        | 0.792 (0.291, 2.158)  |      |
| Q3                                 | 40 (27.03)  | 3.34 | 0.174            | 0.564 (0.246, 1.289) | 0.187        | 0.518 (0.195, 1.376)  |      |
| Q2                                 | 30 (20.27)  | 2.44 | 0.744            | 0.869 (0.375, 2.015) | 0.477        | 0.698 (0.259, 1.881)  |      |
| Q1                                 | 26 (17.57)  | 2.41 | 0.527            | 1.291 (0.585, 2.848) | 0.416        | 0.668 (0.252, 1.768)  |      |
| <b>First-line treatment method</b> |             |      |                  |                      |              |                       |      |
| Untreated                          | 2 (1.35)    | 1.19 |                  | Ref.                 |              |                       | Ref. |
| Radiotherapy                       | 3 (2.03)    | 0.98 | 0.997            | 1.004 (0.167, 6.039) | 0.070        | 0.043 (0.001, 1.276)  |      |
| Chemotherapy                       | 11 (7.43)   | 0.93 | 0.942            | 0.945 (0.206, 4.342) | <b>0.031</b> | 0.026 (0.001, 0.723)  |      |
| Surgery                            | 106 (7.16)  | 3.11 | <b>0.004</b>     | 0.120 (0.028, 0.509) | <b>0.002</b> | 0.007 (0.001, 0.161)  |      |
| Combination therapy                | 25 (16.89)  | 2.64 | <b>0.028</b>     | 0.180 (0.039, 0.828) | <b>0.005</b> | 0.010 (0.001, 0.253)  |      |
| Missing                            | 1 (0.68)    |      |                  |                      |              |                       |      |
| <b>TNM staging</b>                 |             |      |                  |                      |              |                       |      |
| 0-I+II                             | 98 (66.22)  | 3.27 |                  | Ref.                 |              |                       | Ref. |
| III+IV                             | 50 (33.78)  | 1.85 | <b>&lt;0.001</b> | 4.568 (2.733, 7.633) | <b>0.001</b> | 3.115 (1.546, 6.278)  |      |
| <b>Grade of differentiation</b>    |             |      |                  |                      |              |                       |      |
| G1 Highly differentiated           | 7 (4.73)    | 3.59 |                  | Ref.                 |              |                       | Ref. |
| G2 Medium differentiation          | 60 (40.54)  | 3.14 | 0.755            | 0.789 (0.178, 3.501) | 0.643        | 0.696 (0.151, 3.218)  |      |

|                                   |             |      |              |                       |              |                       |
|-----------------------------------|-------------|------|--------------|-----------------------|--------------|-----------------------|
| G3 Poorly differentiated          | 40 (27.03)  | 2.55 | 0.225        | 2.460 (0.575, 10.519) | 0.673        | 1.407 (0.288, 6.878)  |
| G4 Undifferentiated               | 7 (4.73)    | 3.48 | 0.315        | 2.460 (0.575, 10.519) | 0.438        | 2.045 (0.335, 12.482) |
| Gx Grading cannot be evaluated    | 23 (15.54)  | 1.79 | 0.093        | 3.576 (0.809, 15.801) | 0.922        | 1.089 (0.199, 5.957)  |
| Missing                           | 11 (7.43)   |      |              |                       |              |                       |
| <b><i>Helicobacter pylori</i></b> |             |      |              |                       |              |                       |
| HP-                               | 34 (22.97)  | 2.52 |              | Ref.                  |              | Ref.                  |
| HP+                               | 108 (72.97) | 2.87 | 0.763        | 0.914 (0.510, 1.639)  | 0.721        | 1.141 (0.554, 2.349)  |
| Missing                           | 6 (4.05)    |      |              |                       |              |                       |
| <b>Gastric atrophy</b>            |             |      |              |                       |              |                       |
| No                                | 90 (60.81)  | 3.14 |              | Ref.                  |              | Ref.                  |
| Yes                               | 30 (20.27)  | 2.10 | <b>0.002</b> | 2.547 (1.407, 4.609)  | <b>0.047</b> | 2.196 (1.011, 4.771)  |
| Missing                           | 28 (18.92)  |      |              |                       |              |                       |

<sup>a</sup>aHR with adjustment for TILs, age, sex, grade of differentiation, TNM staging, first-line treatment method, BMI.

**Supplementary Table 7. Univariable and multivariable Cox regression analyses of basic characteristics with OS in ESCC of Taixing dataset (Discovery, *N* = 418).**

| Characteristics             | No. of patients (%) | Median survival (years) | Univariable analysis |                      | Multivariable analysis |                           |
|-----------------------------|---------------------|-------------------------|----------------------|----------------------|------------------------|---------------------------|
|                             |                     |                         | <i>P</i> -value      | HR (95% CI)          | <i>P</i> -value        | aHR <sup>a</sup> (95% CI) |
| <b>TILs, Median (IQR)</b>   | 0.14 (0.02, 0.84)   |                         | <b>0.045</b>         | 0.958 (0.918, 0.999) | <b>0.041</b>           | 0.954 (0.911, 0.998)      |
| <b>Age, mean (range)</b>    | 65.60 (42–85)       |                         | <b>0.003</b>         | 1.024 (1.008, 1.041) | <b>0.016</b>           | 1.021 (1.004, 1.039)      |
| <b>Sex</b>                  |                     |                         |                      |                      |                        |                           |
| Woman                       | 152 (36.36)         | 2.89                    |                      | Ref.                 |                        | Ref.                      |
| Man                         | 266 (63.64)         | 2.54                    | <b>0.023</b>         | 0.716 (0.537, 0.954) | <b>0.004</b>           | 1.574 (1.157, 2.140)      |
| <b>Marriage</b>             |                     |                         |                      |                      |                        |                           |
| Divorce/widow               | 70 (16.75)          | 2.58                    |                      | Ref.                 |                        | Ref.                      |
| Unmarried                   | 9 (2.15)            | 0.99                    | <b>0.019</b>         | 2.649 (1.172, 5.986) | <b>0.005</b>           | 3.765 (1.504, 9.424)      |
| Married                     | 339 (81.10)         | 2.74                    | 0.697                | 1.076 (0.745, 1.553) | 0.147                  | 1.341 (0.902, 1.993)      |
| <b>Educational level</b>    |                     |                         |                      |                      |                        |                           |
| High school and above       | 25 (5.98)           | 2.81                    |                      | Ref.                 |                        | Ref.                      |
| Primary or Secondary school | 252 (60.29)         | 2.71                    | 0.583                | 1.188 (0.642, 2.200) | 0.787                  | 1.091 (0.579, 2.055)      |
| Illiteracy                  | 141 (33.73)         | 2.61                    | 0.416                | 1.300 (0.690, 2.449) | 0.340                  | 1.398 (0.702, 2.786)      |
| <b>Cigarette smoking</b>    |                     |                         |                      |                      |                        |                           |
| Never                       | 180 (43.06)         | 2.76                    |                      | Ref.                 |                        | Ref.                      |
| Ever or still               | 219 (52.39)         | 2.61                    | 0.223                | 1.187 (0.901, 1.564) | 0.179                  | 0.745 (0.485, 1.144)      |
| Missing                     | 19 (4.55)           |                         |                      |                      |                        |                           |
| <b>Alcohol drinking</b>     |                     |                         |                      |                      |                        |                           |
| Never                       | 194 (46.41)         | 2.61                    |                      | Ref.                 |                        | Ref.                      |
| Ever or still               | 205 (49.04)         | 2.76                    | 0.914                | 1.015 (0.773, 1.333) | 0.094                  | 0.735 (0.513, 1.053)      |
| Missing                     | 199 (4.55)          |                         |                      |                      |                        |                           |
| <b>Tea drinking</b>         |                     |                         |                      |                      |                        |                           |
| Never                       | 285 (68.18)         | 2.70                    |                      | Ref.                 |                        | Ref.                      |
| Ever                        | 115 (27.51)         | 2.55                    | 0.268                | 1.178 (0.881, 1.576) | 0.749                  | 1.058 (0.749, 1.493)      |
| Missing                     | 18 (4.31)           |                         |                      |                      |                        |                           |
| <b>BMI</b>                  |                     |                         |                      |                      |                        |                           |
| ≥24                         | 122 (29.19)         | 2.82                    |                      | Ref.                 |                        | Ref.                      |
| 18.5–24                     | 248 (59.33)         | 2.61                    | 0.095                | 1.308 (0.955, 1.791) | 0.564                  | 0.564 (0.796, 1.521)      |



|                                    |             |      |                  |                      |                  |                      |
|------------------------------------|-------------|------|------------------|----------------------|------------------|----------------------|
| <18.5                              | 48 (11.48)  | 2.09 | <b>0.047</b>     | 1.579 (1.006, 2.479) | 0.406            | 0.406 (0.765, 1.937) |
| Missing                            | 0 (0.00)    |      |                  |                      |                  |                      |
| <b>Wealth scores</b>               |             |      |                  |                      |                  |                      |
| Q5                                 | 46 (11.00)  | 2.92 |                  | Ref.                 |                  | Ref.                 |
| Q4                                 | 84 (20.10)  | 2.66 | 0.149            | 1.489 (0.867, 2.558) | 0.332            | 1.316 (0.755, 2.295) |
| Q3                                 | 78 (18.66)  | 2.57 | 0.429            | 1.258 (0.712, 2.223) | 0.918            | 1.031 (0.575, 1.849) |
| Q2                                 | 85 (20.33)  | 2.62 | 0.259            | 1.373 (0.791, 2.382) | 0.201            | 1.445 (0.822, 2.542) |
| Q1                                 | 125 (29.90) | 2.68 | 0.068            | 1.615 (0.964, 2.706) | 0.245            | 1.373 (0.804, 2.343) |
| <b>First-line treatment method</b> |             |      |                  |                      |                  |                      |
| Untreated                          | 2 (0.47)    | 0.38 |                  | Ref.                 |                  | Ref.                 |
| Radiotherapy                       | 39 (9.33)   | 2.25 | <b>&lt;0.001</b> | 0.063 (0.014, 0.282) | <b>&lt;0.001</b> | 0.059 (0.128, 0.274) |
| Chemotherapy                       | 46 (11.00)  | 1.53 | <b>&lt;0.001</b> | 0.078 (0.018, 0.343) | <b>&lt;0.001</b> | 0.063 (0.139, 0.283) |
| Surgery                            | 250 (59.81) | 2.89 | <b>&lt;0.001</b> | 0.040 (0.009, 0.171) | <b>&lt;0.001</b> | 0.054 (0.125, 0.236) |
| Combination therapy                | 81 (19.38)  | 2.55 | <b>&lt;0.001</b> | 0.048 (0.011, 0.211) | <b>&lt;0.001</b> | 0.059 (1.331, 0.263) |
| Missing                            | 0 (0.00)    |      |                  |                      |                  |                      |
| <b>TNM staging</b>                 |             |      |                  |                      |                  |                      |
| 0+I+II                             | 256 (61.24) | 3.04 |                  | Ref.                 |                  | Ref.                 |
| III+IV                             | 162(38.76)  | 1.56 | <b>&lt;0.001</b> | 2.435 (1.863, 3.182) | <b>&lt;0.001</b> | 2.273 (1.684, 3.070) |
| <b>Grade of differentiation</b>    |             |      |                  |                      |                  |                      |
| G1 Highly differentiated           | 39 (9.33)   | 3.13 |                  | Ref.                 |                  | Ref.                 |
| G2 Medium differentiation          | 283 (67.70) | 2.76 | 0.067            | 1.701 (0.963, 3.003) | 0.115            | 1.596 (0.893, 2.852) |
| G3 Poorly differentiated           | 51 (12.20)  | 1.75 | <b>0.003</b>     | 2.611 (1.373, 4.966) | 0.131            | 1.671 (0.859, 3.251) |
| G4 Undifferentiated                | 34 (8.13)   | 2.32 | <b>0.009</b>     | 2.505 (1.253, 5.010) | 0.589            | 1.223 (0.589, 2.542) |
| Gx Grading cannot be evaluated     | 9 (2.15)    | 1.59 | <b>0.011</b>     | 3.286 (1.309, 8.247) | 0.121            | 2.145 (0.818, 5.625) |
| Missing                            | 2 (0.48)    |      |                  |                      |                  |                      |
| <b>Helicobacter pylori</b>         |             |      |                  |                      |                  |                      |
| HP-                                | 135 (32.30) | 2.61 |                  | Ref.                 |                  | Ref.                 |
| HP+                                | 263 (62.92) | 2.66 | 0.328            | 1.156 (0.864, 1.547) | 0.519            | 1.103 (0.818, 1.488) |
| Missing                            | 20 (4.78)   |      |                  |                      |                  |                      |
| <b>Gastric atrophy</b>             |             |      |                  |                      |                  |                      |
| No                                 | 289 (69.14) | 2.68 |                  | Ref.                 |                  | Ref.                 |
| Yes                                | 54 (12.92)  | 2.50 | 0.849            | 1.040 (0.695, 1.556) | 0.750            | 1.071 (0.701, 1.638) |
| Missing                            | 75 (17.94)  |      |                  |                      |                  |                      |

<sup>a</sup>aHR with adjustment for TILs, age, sex, grade of differentiation, TNM staging, first-line treatment method, BMI.

**Supplementary Table 8. Univariable and multivariable Cox regression analyses of basic characteristics with OS in AEGJ of TCGA dataset (Validation, N = 169).**

| Characteristics           | No. of patients (%) | Median survival (years) | Univariable analysis |                      | Multivariable analysis |                           |
|---------------------------|---------------------|-------------------------|----------------------|----------------------|------------------------|---------------------------|
|                           |                     |                         | P-value              | HR (95% CI)          | P-value                | aHR <sup>a</sup> (95% CI) |
| <b>TILs, Median (IQR)</b> | 1.99 (0.63, 6.38)   |                         | <b>0.003</b>         | 0.897 (0.835, 0.964) | <b>0.002</b>           | 0.812 (0.712, 0.925)      |
| <b>Age, mean (range)</b>  | 65.43 (27–90)       |                         | 0.806                | 1.003 (0.982, 1.024) | 0.344                  | 1.014 (0.985, 1.045)      |
| <b>Sex</b>                |                     |                         |                      |                      |                        |                           |
| Woman                     | 46 (27.22)          | 0.97                    |                      | Ref.                 |                        | Ref.                      |
| Man                       | 123 (72.78)         | 1.36                    | 0.530                | 1.207 (0.671, 2.169) | 0.444                  | 1.325 (0.646, 2.718)      |

| <b>First-line treatment method</b> |            |      |              |                      |       |                      |  |
|------------------------------------|------------|------|--------------|----------------------|-------|----------------------|--|
| Pharmaceutical Therapy             | 89 (52.66) | 1.25 |              | Ref.                 |       | Ref.                 |  |
| Radiotherapy                       | 80 (47.34) | 1.26 | 0.613        | 0.887 (0.559, 1.409) | 0.234 | 1.447 (0.788, 2.657) |  |
| <b>Grade of differentiation</b>    |            |      |              |                      |       |                      |  |
| Grade 1–2                          | 46 (27.22) | 1.45 |              | Ref.                 |       | Ref.                 |  |
| Grade 3                            | 72 (42.60) | 1.08 | 0.073        | 1.787 (0.948, 3.366) | 0.125 | 1.676 (0.866, 3.240) |  |
| Missing                            | 51 (30.18) |      |              |                      |       |                      |  |
| <b>TNM staging</b>                 |            |      |              |                      |       |                      |  |
| I+II                               | 71 (42.01) | 1.28 |              | Ref.                 |       | Ref.                 |  |
| III+IV                             | 85 (50.30) | 1.35 | <b>0.014</b> | 1.921 (1.140, 3.236) | 0.644 | 1.167 (0.606, 2.249) |  |
| Missing                            | 13 (7.69)  |      |              |                      |       |                      |  |

<sup>a</sup>aHR with adjustment for TILs proportion, age, sex, first-line treatment method, grade of differentiation, and TNM staging.

**Supplementary Table 9. Univariable and multivariable Cox regression analyses of basic characteristics with OS in GAC of TCGA dataset (Validation, N = 222).**

| Characteristics                    | No. of patients (%) | Median survival (years) | Univariable analysis |                      | Multivariable analysis |                           |  |
|------------------------------------|---------------------|-------------------------|----------------------|----------------------|------------------------|---------------------------|--|
|                                    |                     |                         | P-value              | HR (95% CI)          | P-value                | aHR <sup>a</sup> (95% CI) |  |
| <b>TILs, Median (IQR)</b>          | 4.14 (1.17, 12.99)  |                         | <b>0.004</b>         | 0.961 (0.935, 0.988) | <b>0.025</b>           | 0.969 (0.942, 0.996)      |  |
| <b>Age, mean (range)</b>           | 65.52 (30–90)       |                         | <b>0.019</b>         | 1.027 (1.004, 1.050) | <b>0.002</b>           | 1.039 (1.014, 1.064)      |  |
| <b>Sex</b>                         |                     |                         |                      |                      |                        |                           |  |
| Woman                              | 80 (27.22)          | 1.72                    |                      | Ref.                 |                        | Ref.                      |  |
| Man                                | 142 (72.78)         | 1.17                    | 0.492                | 1.172 (0.746, 1.841) | 0.797                  | 1.064 (0.662, 1.711)      |  |
| <b>First-line treatment method</b> |                     |                         |                      |                      |                        |                           |  |
| Pharmaceutical Therapy             | 109 (49.10)         | 1.30                    |                      | Ref.                 |                        | Ref.                      |  |
| Radiotherapy                       | 113 (50.90)         | 1.44                    | 0.873                | 0.966 (0.627, 1.486) | 0.912                  | 1.026 (0.646, 1.631)      |  |
| <b>Grade of differentiation</b>    |                     |                         |                      |                      |                        |                           |  |
| Grade 1–2                          | 83 (37.39)          | 1.44                    |                      | Ref.                 |                        | Ref.                      |  |
| Grade 3                            | 133 (59.91)         | 1.18                    | 0.085                | 1.510 (0.944, 2.414) | 0.119                  | 1.486 (0.904, 2.442)      |  |
| Missing                            | 6 (2.70)            |                         |                      |                      |                        |                           |  |
| <b>TNM staging</b>                 |                     |                         |                      |                      |                        |                           |  |
| I+II                               | 95 (42.79)          | 1.66                    |                      | Ref.                 |                        | Ref.                      |  |
| III+IV                             | 123 (55.41)         | 1.10                    | <b>0.001</b>         | 2.780 (1.704, 4.533) | <b>0.001</b>           | 2.464 (1.468, 4.134)      |  |
| Missing                            | 4 (1.80)            |                         |                      |                      |                        |                           |  |

<sup>a</sup>aHR with adjustment for TILs proportion, age, sex, first-line treatment method, grade of differentiation, and TNM staging.

**Supplementary Table 10. Univariable and multivariable Cox regression analyses of basic characteristics with OS in ESCC of TCGA dataset (Validation, N = 70).**

| Characteristics    | No. of patients (%) | Median survival (years) | Univariable analysis |                       | Multivariable analysis |                           |  |
|--------------------|---------------------|-------------------------|----------------------|-----------------------|------------------------|---------------------------|--|
|                    |                     |                         | P-value              | HR (95% CI)           | P-value                | aHR <sup>a</sup> (95% CI) |  |
| TILs, Median (IQR) | 33.00 (9.77, 62.62) |                         | 0.080                | 0.986 (0.970, 1.002)  | 0.133                  | 0.985 (0.965, 1.005)      |  |
| Age, mean (range)  | 57.01 (36–90)       |                         | <b>0.031</b>         | 1.052 (1.005, 1.102)  | 0.058                  | 1.063 (0.998, 1.132)      |  |
| <b>Sex</b>         |                     |                         |                      |                       |                        |                           |  |
| Woman              | 11 (27.22)          | 1.95                    |                      | Ref.                  |                        | Ref.                      |  |
| Man                | 59 (72.78)          | 1.04                    | <b>0.045</b>         | 4.546 (1.032, 20.040) | 0.070                  | 6.690 (0.854, 52.415)     |  |

|                                    |            |      |              |                      |       |                      |
|------------------------------------|------------|------|--------------|----------------------|-------|----------------------|
| <b>First-line treatment method</b> |            |      |              |                      |       |                      |
| Pharmaceutical Therapy             | 36 (70.00) | 1.06 |              | Ref.                 |       | Ref.                 |
| Radiotherapy                       | 34 (50.90) | 1.05 | 0.542        | 0.777 (0.346, 1.746) | 0.187 | 0.492 (0.171, 1.411) |
| <b>Grade of differentiation</b>    |            |      |              |                      |       |                      |
| Grade 1-2                          | 49 (70.00) | 1.05 |              | Ref.                 |       | Ref.                 |
| Grade 3                            | 15 (21.43) | 1.10 | 0.290        | 0.516 (0.152, 1.758) | 0.182 | 0.357 (0.079, 1.619) |
| Missing                            | 6 (8.57)   |      |              |                      |       |                      |
| <b>TNM staging</b>                 |            |      |              |                      |       |                      |
| I+II                               | 43 (61.43) | 1.10 |              | Ref.                 |       | Ref.                 |
| III+IV                             | 26 (31.17) | 1.02 | <b>0.048</b> | 2.258 (1.006, 5.067) | 0.150 | 2.125 (0.762, 5.922) |
| Missing                            | 1 (1.80)   |      |              |                      |       |                      |

<sup>a</sup>aHR with adjustment for TILs proportion, age, sex, first-line treatment method, grade of differentiation, and TNM staging.
